# Supplementary material
Source: PubMed Central journal article supplement (PMC4677329)

## Mechanistic, Crystallographic, and Computational Studies on the Catalytic, Enantioselective Sulfenofunctionalisation of Alkenes

Scott E. Denmark,\* Eduard Hartmann, David J. P. Kornfilt, Hao Wang

*Department of Chemistry, University of Illinois Urbana-Champaign, Urbana, Illinois 61801*

### SUPPORTING INFORMATION

| TABLE OF CONTENTS                                                                 | PAGE |
|-----------------------------------------------------------------------------------|------|
| General Experimental                                                              | S2   |
| Literature Preparations                                                           | S3   |
| Experimental Procedures                                                           | S5   |
| Kinetic Studies                                                                   | S10  |
| Studies of the Catalytically Active Species <b>5</b>                              | S13  |
| Synthesis of Sulfenylating Agents                                                 | S20  |
| Synthesis of Thiophenols                                                          | S20  |
| General Procedure 1                                                               | S24  |
| Synthesis of Sulfenylating Agents                                                 | S24  |
| Thioetherifications (Table 1)                                                     | S39  |
| General Procedure 2                                                               | S39  |
| Sulfenylating Agent Survey                                                        | S40  |
| Substrate Scope Survey (Table 2)                                                  | S55  |
| General Procedure 3                                                               | S55  |
| Sulfenofunctionalisation Using Sterically Demanding Sulfenylating Agents          | S56  |
| Calculations of the Transition Structures                                         | S74  |
| X-ray Crystal Structure of <b>S5</b> <sup>2+</sup> 2SbCl <sub>6</sub>             | S93  |
| X-ray Crystal Structure of <b>5b</b> <sup>+</sup> BARF <sub>24</sub> <sup>-</sup> | S112 |
| References                                                                        | S145 |
| NMR Spectra                                                                       | S148 |

## General Experimental

All reactions were performed in oven (160 °C) and/or flamed-dried glassware under an atmosphere of dry argon unless otherwise noted. Reaction solvents tetrahydrofuran (Fisher, HPLC grade), ether (Fisher, ACS grade, BHT stabilized), and dichloromethane (Fisher, unstabilized HPLC grade) were dried by percolation through two columns packed with neutral alumina under a positive pressure of argon. Reaction solvents hexanes (Fisher, Optima grade) and toluene (Fisher, ACS grade) were dried by percolation through a column packed with neutral alumina and a column packed with Q5 reactant (supported copper catalyst for scavenging oxygen) under a positive pressure of argon. Solvents for filtration, transfers, and chromatography were certified ACS grade. “Brine” refers to a saturated solution of sodium chloride in H<sub>2</sub>O. All reaction temperatures correspond to internal temperatures measured with Teflon coated thermocouples. A ThermoNesLab CC-100 cryocool with an attached cryotrol was used for reactions at subambient temperatures.

<sup>1</sup>H and <sup>13</sup>C NMR spectra were recorded on Varian Unity (400 MHz, <sup>1</sup>H; 101 MHz, <sup>13</sup>C) or Inova (500 MHz, <sup>1</sup>H; 126 MHz, <sup>13</sup>C) spectrometers. <sup>31</sup>P NMR and <sup>19</sup>F spectra were recorded on Inova (202 MHz) and Inova (470 MHz) spectrometers respectively. Acquisition times were 4.096 s for <sup>1</sup>H NMR, and 1.024 s for <sup>13</sup>C NMR, 0.655 s for <sup>31</sup>P NMR, and 0.328 s for <sup>19</sup>F NMR. Spectra are referenced to residual chloroform ( $\delta = 7.26$  ppm, <sup>1</sup>H; 77.0 ppm, <sup>13</sup>C). Chemical shifts are reported in parts per million, multiplicities are indicated by s (singlet), d (doublet), t (triplet), q (quartet), pentet (pent), heptet (hept), m (multiplet), and br (broad). Coupling constants, *J*, are reported in Hertz, and integration is provided and assignments are indicated. Assignments were confirmed through 2-D COSY and HSQC experiments. Elemental analysis was performed by the University of Illinois Microanalysis Laboratory or Robertson Microlit Laboratories. Mass spectrometry (MS) was performed by the University of Illinois Mass Spectrometry Laboratory. Electron Impact (EI) spectra were performed at 70 eV using methane as the carrier gas on a Finnegan-MAT C5 spectrometer. Chemical Ionization (CI) spectra were performed with methane reagent gas on a Micromass 70-VSE spectrometer. Electrospray Ionization (ESI) spectra were performed on a Micromass Q-ToF Ultima spectrometer. Data are reported in the form of *m/z* (intensity relative to the base peak = 100). Infrared spectra (IR) were recorded on a Perkin-Elmer FT-IR system with NaCl salt plates or as neat. The peaks are reported in cm<sup>-1</sup> with indicated relative intensities: s (strong, 0–33% T); m (medium, 34–66% T), w (weak, 67–100%), and br (broad). Melting points (mp) were determined on a Thomas-Hoover capillary melting point

apparatus in sealed tubes and are corrected.

Analytical thin-layer chromatography was performed on Merck silica gel 60 F<sub>254</sub> or Merck silica gel 60 RP-18 F<sub>254s</sub> plates. Visualization was accomplished with UV light and/or potassium permanganate (KMnO<sub>4</sub>) solution or ceric ammonium molybdenat (CAM) solution. R<sub>f</sub> values reported were measured using a 10 × 2 cm TLC plate in a developing chamber containing the solvent system described. Flash chromatography was performed using Merck silica gel 60 230–400 mesh (60–63 μ, 60 Å pore size) unless otherwise stated.

Analytical supercritical fluid chromatography (SFC) was performed on an Agilent 1100 HPLC equipped with an Aurora Systems A-5 supercritical CO<sub>2</sub> adapter for supercritical fluid chromatography and a UV detector (220 nm or 254 nm) using Daicel Chiralcel OD, OJ, OB or Chiralpak AD, and AS columns. Normal-Phase HPLC was performed on an Agilent 1100 HPLC using a Chiralpak AD-H or a Regis (*R,R*)-Whelk-O1 column. Reverse-Phase HPLC was performed on an Agilent 1100 HPLC using a Chiralpak AD-RH or a Chiralcel OJ-RH column.

Commercial reagents were purified by distillation or recrystallization prior to use unless otherwise stated. Solvents for chromatography, filtration and recrystallization were dichloromethane (Aldrich, ACS grade), ethyl acetate (Fisher, ACS grade), diethyl ether (Fisher, ACS grade), hexane (Fisher, Optima) and methanol (Fisher, Optima). Methanesulfonic acid (Aldrich) was dried following an established procedure.<sup>1</sup> Phthalimide (Aldrich), 4-methoxythiophenol (**S14**) (Matrix Scientific), 4-(trifluoromethyl)thiophenol (**S15**) (Oakwood Products), 4-nitrobenzenesulfonyl chloride (**S16**) (Aldrich), 2-methylthiophenol (**S17**) (Aldrich), 2-ethylthiophenol (**S19**) (Oakwood Products), 2-isopropylthiophenol (**S20**) (TCI), 2,6-dimethylthiophenol (**S18**) (Oakwood Products), sulfur powder (Fisher Chemicals), selenium powder (Aldrich) *m*-Chloroperbenzoic acid (70–77%, Acros).

## Literature Preparations

The following compounds were prepared according to literature procedures: (*R*)-6,6-dimethyl-2,2-di(methylamino)-1,1-biphenyl (**S1**)<sup>2</sup>, (*E*)-5-(2-fluorophenyl)-pent-4-en-1-ol (**1a**)<sup>3</sup>, (±)-*N,N'*-dimethyl-[1,1'-binaphthalene]-2,2'-diamine ((±)-**S2**)<sup>4</sup>, 1,1-dichloro-*N,N*-diisopropylphosphanamine (*i*-Pr<sub>2</sub>N–PCl<sub>2</sub>)<sup>5</sup>, 1,1-dimethyl-2-phenyldisulfan-1-ium hexachloroantimonate ([PhS(SMe<sub>2</sub>)]SbCl<sub>6</sub>)<sup>6</sup>, benzenesulfonyl chloride (PhSOCl)<sup>7</sup>, sodium tetrakis[3,5-bis(trifluoromethyl)phenyl]borate (NaBArF<sub>24</sub>)<sup>8</sup>, 1-bromo-2,6-diethylbenzene (**S6**)<sup>9</sup>, 1-bromo-2,6-diisopropylbenzene (**S8**)<sup>10</sup>, 1-bromo-3,5-diisopropylbenzene (**S10**)<sup>11</sup>, 1,3-diisopropoxybenzene

(**S12**)<sup>12</sup>, 1-naphthalenethiol (**S21**)<sup>13</sup>, 2-naphthalenethiol (**S22**)<sup>13</sup>, (*E*)-5-phenylpent-4-en-1-ol (**1b**)<sup>14</sup>, catalyst (*R*)-**3c**<sup>15</sup>, (*E*)-5-phenyl-*N*-tosylpent-4-enamide (**1f**)<sup>15</sup>,

## Experimental Procedures

### Preparation of 6-(Azepan-1-yl)-1,5,7,11-tetramethyl-5,7-dihydrodibenzo[d,f][1,3,2]-diazaphosphepine 6-selenide ((*R*)-**3a**)

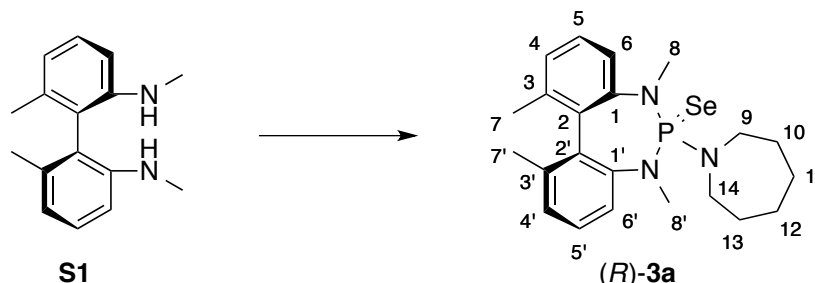

To a dry, 20-mL Schlenk flask under argon was added 6,6-dimethyl-2,2-di(methylamino)-1,1-biphenyl<sup>2</sup> (580 mg, 2.45 mmol), THF (9 mL) and Et<sub>3</sub>N (780  $\mu$ L, 5.63 mmol, 2.30 equiv). The solution was cooled to 0 °C. Neat, distilled PCl<sub>3</sub> (630  $\mu$ L, 7.36 mmol, 3.00 equiv) was added via syringe, and the reaction was allowed to stir for 3 h at room temperature. The resulting precipitate was filtered off via cannula with the filtrate being transferred to a 100-mL Schlenk flask. The THF was removed by stirring under vacuum. Azepane (310  $\mu$ L, 2.80 mmol, 1.10 equiv), CH<sub>2</sub>Cl<sub>2</sub> (15 mL) and Et<sub>3</sub>N (500  $\mu$ L, 3.60 mmol, 1.48 equiv) were added and the reaction allowed to stir for 16 h. Selenium powder (580 mg, 7.36 mmol, 3.00 equiv) was added and the reaction stirred at room temperature for 24 h. The excess selenium was filtered off through a pad of Celite and the filtrate was concentrated to yield an orange foam. The material was dissolved in a minimal amount CH<sub>2</sub>Cl<sub>2</sub> and purified by chromatography (SiO<sub>2</sub>, 140 g, 20 mm  $\varnothing$   $\times$  18 cm, hexane/CH<sub>2</sub>Cl<sub>2</sub>, 6:1). The resulting off-white powder was filtered through a silica plug washing with hexane/Et<sub>2</sub>O (1:1) to yield 880 mg (82%) of (*R*)-**3a** (Note: The use of ether is important to remove all traces of selenium). An analytically pure sample was obtained by recrystallization from hexane (ca. 10 mL/g).

#### Data for (*R*)-**3a**:

mp: 105–107 °C (hexane)

<sup>1</sup>H NMR: (500 MHz, CDCl<sub>3</sub>)

$\delta$  7.27 (t,  $J$  = 7.8 Hz, 1H, H(C5)), 7.22 (t,  $J$  = 7.7 Hz, 1H, H(C5')), 7.15 (dd,  $J$  = 8.1, 3.1 Hz, 2H, HC(4), HC(4')), 7.09 (d,  $J$  = 7.5 Hz, 1H, H(C6)), 7.06 (d,  $J$  = 7.6 Hz, 1H, H(C6')), 3.18 (tt,  $J$  = 9.5, 4.6 Hz, 2H, HC(9)), 3.07 (d,  $J$  = 12.5 Hz, 3H, H(C8)), 2.95 (ddd,  $J$  = 14.3, 10.3, 4.6 Hz, 2H, H(C9')), 2.75 (d,  $J$  = 13.4 Hz, 3H, H(C8')),

2.13 (s, 3H, HC(7)), 2.03 (s, 3H, H(C7')), 1.59 (s, 8H, HC(10), C(11)).

$^{13}\text{C}$  NMR: (125 MHz,  $\text{CDCl}_3$ )

$\delta$  144.6 (d,  $J = 5.5$  Hz, C(1)), 143.6 (C(1')), 137.4 (C(3)), 136.8 (C(3')), 134.6 (C(2)), 132.5 (d,  $J = 2.6$  Hz, C(2')), 127.8 (d,  $J = 2.1$  Hz, C(5)), 127.4 (C(5')), 127.2 (C(6)), 126.9 (d,  $J = 2.5$  Hz, C(6')), 122.0 (C(4)), 120.3 (d,  $J = 3.6$  Hz, C(4')), 49.6 (d,  $J = 2.0$  Hz, C(9)), 38.7 (d,  $J = 10.1$  Hz, C(8)), 35.5 (d,  $J = 6.3$  Hz, C(8')), 30.3 (d,  $J = 4.7$  Hz, C(7)), 26.7 (C(7)), 20.0 (C(10)), 19.8 (C(11))

$^{31}\text{P}$  NMR: (202 MHz,  $\text{CDCl}_3$ )

$\delta$  89.4,  $J_{\text{P-Se}} = 818$  Hz

IR: (ATR,  $\text{cm}^{-1}$ )

2934 (w), 2858 (w), 1665 (m), 1590 (w), 1510 (w), 1451 (m), 1380 (w), 1278 (s), 1239 (s), 1223 (s), 1155 (s), 1088 (m), 1055(m), 1027 (s), 1001 (m), 920 (m), 892 (w), 846 (w), 819 (s), 784 (m), 755 (m), 734 (m), 701 (s), 688 (m), 636 (s), 615 (s)

HRMS: calcd for  $\text{C}_{22}\text{H}_{31}\text{N}_3\text{PSe}$ : 448.1425, found: 448.1421

TLC:  $R_f = 0.52$  (hexane/EtOAc, 4:1)

Analysis:  $\text{C}_{22}\text{H}_{30}\text{N}_3\text{PSe}$  (446.44)

Calcd: C, 59.19; H, 6.77; N, 9.41

Found: C, 59.50; H, 6.65; N, 9.12

### Preparation of 4-(Diisopropylamino)-3,5-dimethyl-3,5-dihydrodinaphtho[2,1-*d*:1',2'-*f*][1,3,2] diazaphosphepine 4-sulfide (( $\pm$ )-**3b**)

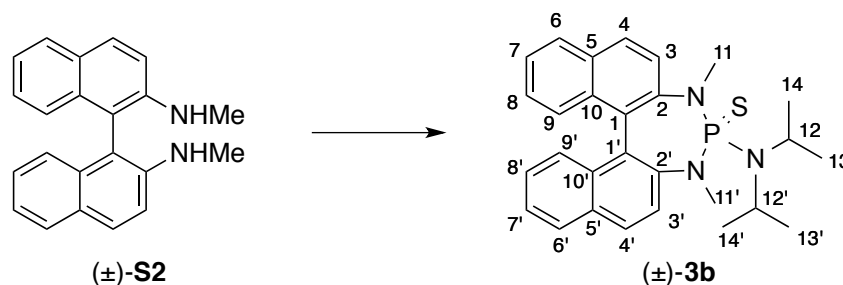

By analogy to a literature procedure,<sup>15</sup> a flame-dried Schlenk flask equipped with a magnetic stir bar and an argon inlet was evacuated and backfilled with argon (2  $\times$ ). The flask was charged with ( $\pm$ )-dimethyl BINAM (( $\pm$ )-**S2**) (960 mg, 3.07 mmol) and THF (20.5 mL), and the solution was cooled to  $-72$   $^{\circ}\text{C}$  (internal temperature) using a dry-ice/acetone bath. *n*-BuLi

(1.55 M solution in hexane, 4.00 mL, 6.20 mmol, 2.02 equiv) was added dropwise over 10 min yielding a yellow-black suspension. The mixture was warmed to 22 °C (internal temperature), stirred at this temperature for 30 min and cooled again to -72 °C. To the cooled mixture was added a freshly prepared solution of *i*-Pr<sub>2</sub>N-PCl<sub>2</sub><sup>5</sup> (655 mg, 3.24 mmol, 1.06 equiv) and THF (5.2 mL) dropwise over 10 min and the mixture was warmed to 22 °C. After 45 min, sulfur powder (296 mg, 9.23 mmol, 3.00 equiv) was added at room temperature and stirring under argon was continued for 52 h. The resulting brown solution was filtered through a pad of Celite<sup>®</sup>, which was rinsed with EtOAc (100 mL). The filtrate was concentrated in vacuo (20–23 °C, 20 mmHg) yielding a brown solid. Purification by flash column chromatography (SiO<sub>2</sub>, 140 g, 45 mm Ø, hexane/Et<sub>2</sub>O = 60:1→30:1) afforded an off-white solid (671 mg), which was recrystallized from EtOAc/hexane to give (±)-**3b** (616 mg, 42%) as a white, crystalline compound. Traces EtOAc could not be removed from the product even when using Abderhalden's drying pistol. The product was dissolved in a minimal amount of benzene and EtOAc was removed azeotropically. Traces benzene (4%) could not be removed from the product.

Data for (±)-**3b**:

mp: 272–274 °C (benzene)

<sup>1</sup>H NMR: (500 MHz, CDCl<sub>3</sub>)

δ 7.99 (d, *J* = 8.9 Hz, 1H, HC(4,4')), 7.92 (d, *J* = 8.9 Hz, 1H, HC(4',4)), 7.90 (d, *J* = 8.5 Hz, 1H, HC(6)), 7.87 (d, *J* = 8.1 Hz, 1H, HC(6)), 7.70 (d, *J* = 8.8 Hz, 1H, HC(3)), 7.66 (d, *J* = 9.0 Hz, 1H, HC(3')), 7.42 (t, *J* = 7.2 Hz, 1H, HC(7)), 7.35 (t, *J* = 7.2 Hz, 1H, HC(7')), 7.29 (d, *J* = 8.5 Hz, 1H, HC(9)), 7.23 (ddd, *J* = 8.4, 6.7, 1.3 Hz, 1H, HC(8)), 7.11 (ddd, *J* = 8.4, 6.9, 1.4 Hz, 1H, HC(8')), 6.98 (d, *J* = 8.6 Hz, 1H, HC(9')), 3.57–3.34 (m, 2H, HC(12), HC(12')), 3.28 d, *J* = 11.7 Hz, 3H, HC(11)), 3.12 d, *J* = 13.3 Hz, 3H, HC(11')), 1.67–1.00 (br, 12H, HC(13), HC(13'), HC(14), HC(14'))

<sup>13</sup>C NMR: (125 MHz, CDCl<sub>3</sub>)

δ 143.7 (d, *J* = 4.4 Hz, C(2,2')), 142.3 (d, *J* = 2.0 Hz, C(2',2)), 132.7 (C(aryl)), 132.3 (C(aryl)), 131.3 (C(aryl)), 130.6 (C(aryl)), 129.1 (C(4,4')), 128.3 (C(4',4)), 128.2 (C(6,6')), 128.1 (C(6',6)), 127.73 (C(9)), 127.67 (d, *J* = 2.5 Hz, C(1,1')), 127.62 (d, *J* = 3.9 Hz, C(1',1)), 127.4 (C(9')), 125.9 (C(8)), 125.6 (C(8')), 124.9 (C(7)), 124.7

(C(7')), 122.8 (d,  $J = 2.1$  Hz, C(3,3')), 122.5 (C(3',3)), 47.6 (br, C(12), C(12')), 36.8 (d,  $J = 11.1$  Hz, C(11,11')), 36.3 (d,  $J = 5.3$  Hz, C(11',11)), 24.7 (C(13,13')), 22.3 (br, C(14,14'))

<sup>31</sup>P NMR: (202 MHz, CDCl<sub>3</sub>)

δ 82.5

IR: 2975 (w), 2924 (w), 1616 (w), 1593 (w), 1505 (w), 1465 (w), 1407 (w), 1363 (w), 1326 (w), 1277 (w), 1259 (w), 1244 (w), 1177 (m), 1143 (m), 1117 (m), 1086 (m), 1025 (w), 1002 (w), 988 (s), 932 (s), 921 (s), 851 (m), 815 (s), 747 (s), 703 (s), 678 (s)

MS: (ESI)

474 (M+H)

HRMS: calcd for C<sub>28</sub>H<sub>33</sub>N<sub>3</sub>PS<sup>+</sup>: 474.2133, found: 474.2130

TLC:  $R_f$  0.42 (hexanes/EtOAc, 10:1)

Analysis: C<sub>28</sub>H<sub>32</sub>N<sub>3</sub>PS (473.62)

Calcd: C, 71.01; H, 6.81; N, 8.87

Found: C, 71.21; H, 6.84; N, 8.62

**Preparation of (2*S*,3*R*)-2-(2-Fluorophenyl)-3-(phenylthio)tetrahydro-2H-pyran (**4a**) and (S)-2-((*R*)-(2-fluorophenyl)(phenylthio)methyl)tetrahydrofuran (**4a'**)**

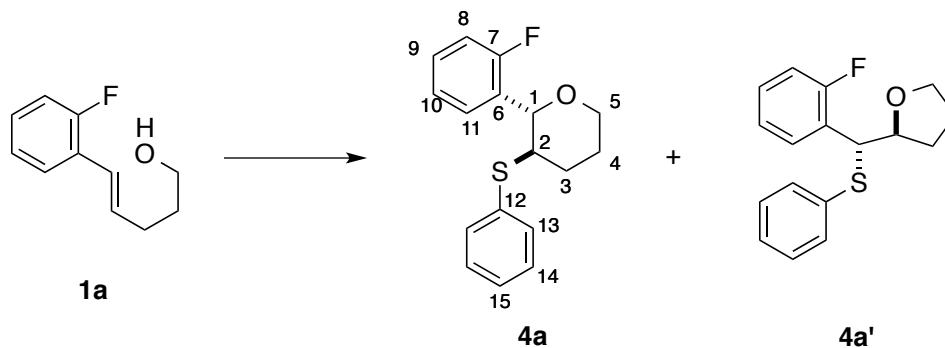

To a 10-mL Schlenk flask was added 5-(2-fluorophenyl)pent-4-en-1-ol (**1a**)<sup>3</sup> (180 mg, 1.00 mmol), sulfenylating agent **2a** (256 mg, 1.00 mmol, 1.00 equiv), (*S*)-**3c** (52.2 mg, 0.100 mmol, 0.100 equiv). To this was added CH<sub>2</sub>Cl<sub>2</sub> (7 mL) and the flask was cooled to 0 °C. Neat, dry MsOH (48 μL, 0.75 mmol, 0.75 equiv) was added via syringe. The reaction was stirred for 24 h at 0 °C and then was quenched with Et<sub>3</sub>N (200 μL). The resulting white suspension was concentrated in vacuo (20–23 °C, 20 mmHg). The residue was taken up in a minimal amount of



chloroform and the compound was purified by column chromatography (SiO<sub>2</sub>, 140 g, 20 mm Ø × 22 cm, hexane/EtOAc, 20:1) to afford 227 mg (79%) of a 20:1 mixture of **4a** and **4a'**. An analytically pure sample was obtained by Kugelrohr distillation.

Data for 4a:

bp: 130 °C (ABT), 0.4 mmHg

<sup>1</sup>H NMR: (500 MHz, CDCl<sub>3</sub>)

δ 7.36 (td, *J* = 7.4, 1.8 Hz, 1H, HC(11)), 7.25–7.10 (m, 6H, HC(9), HC(13), HC(14), HC(15)), 7.05 (td, *J* = 7.6, 1.2 Hz, 1H, H(C(10))), 6.96 (ddd, *J* = 9.6, 8.3, 1.2 Hz, 1H, HC(8)), 4.57 (d, *J* = 10.3 Hz, 1H, HC(1)), 4.08 (ddt, *J* = 11.4, 4.8, 1.7 Hz, 1H, HC(5)), 3.57 (td, *J* = 11.8, 2.2 Hz, 1H, HC(5)), 3.33 (ddd, *J* = 12.0, 10.3, 4.0 Hz, 1H, HC(2)), 2.33 (dtd, *J* = 12.9, 4.7, 2.7 Hz, 1H, HC(3)), 1.91–1.82 (m, 1H, HC(4)), 1.75–1.71 (m, 1H, HC(4)), 1.68 (dd, *J* = 12.5, 4.1 Hz, 1H, HC(3))

<sup>13</sup>C NMR: (125 MHz, CDCl<sub>3</sub>)

δ 160.5 (d, *J* = 247 Hz, C(7)), 133.5 (C(12)), 133.2 (C(14)), 129.6 (d, *J* = 8.7 Hz, HC(11)), 128.8 (d, *J* = 4.2 Hz, HC(10)), 128.5 (C(13)), 127.3 (d, *J* = 11.3 Hz, C(6)), 127.2 (C(15)), 124.0 (d, *J* = 3.8 Hz, C(9)), 115.3 (d, *J* = 22.5 Hz, C(8)), 78.4 (C(1)), 68.6 (C(5)), 50.0 (C(2)), 32.2 (C(3)), 27.0 (C(4))

<sup>19</sup>F NMR: (476 MHz, CDCl<sub>3</sub>)

δ 117.4

IR: (NaCl plate)

3059 (w), 2941 (m), 2850 (m), 1619 (w), 1584 (m), 1493 (s), 1453 (m), 1438 (m), 1371 (w), 1300 (w), 1260 (w), 1232 (s), 1190 (m), 1076 (s), 1025 (s), 970 (m), 959 (m), 829 (m), 798 (m), 757 (s)

HRMS: calcd for C<sub>17</sub>H<sub>18</sub>FOS: 289.1062, found: 289.1062

TLC: *R<sub>f</sub>* = 0.46 (hexane/EtOAc, 4:1)

Opt. Rot. : [α]<sub>D</sub><sup>24</sup> +14.2 (c = 0.97, CHCl<sub>3</sub>)

Analysis: C<sub>17</sub>H<sub>17</sub>FOS (288.38)

Calcd: C, 70.80; H, 5.94;

Found: C, 70.56; H, 5.96;

SFC: (2*S*,3*R*)-**4a**, *t<sub>R</sub>* 5.88 min (90.4%); (2*R*,3*S*)-**4a'**, *t<sub>R</sub>* 5.33 min (9.6%) (Chiralpak AD, 5% MeOH in CO<sub>2</sub>, 2 mL/min, 200 bar, 40 °C)

Data for 4a':<sup>1</sup>H NMR: (500 MHz, CDCl<sub>3</sub>)Diagnostic signals: δ 4.62 (d, *J* = 6.9 Hz, 1H), 4.38 (dq, *J* = 0.8, 6.7 Hz, 1H), 3.87–3.68 (m, 2H), 2.21–2.12(m, 2H), 1.90–1.82 (m, 2H)<sup>19</sup>F NMR: (476 MHz, CDCl<sub>3</sub>)

δ 118.90

**Kinetic Studies (Figure 2)**

General Procedure for kinetic experiments: To a dried 5-mm NMR tube, electrophile **2a** and substrate **1a** were added. To this was added 300 μL of a freshly prepared stock solution of a measured amount of catalyst **3a** and fluorobenzene standard (1.0 equiv of standard with respect to substrate) in CDCl<sub>3</sub>, followed by 400 μL of neat CDCl<sub>3</sub>. The sample was then inserted into a 400 MHz spectrometer that had been pre-cooled to the appropriate temperature and then allowed to equilibrate for 20 minutes. The sample was then ejected, the corresponding amount of MsOH was added, the sample was shaken for ca. 10 s, reinserted and <sup>19</sup>F data collection was begun immediately. Data acquisition parameters were as follows:

Spectral Window : –100 ppm to –130 ppm

pw = 16 μs

Acquisition Time: 1 s

Delay Time: 9 s

Scans per data point: 4

A delay parameter of 20 s was introduced after each data point such that one data point was collected every minute. The reactions were followed to a minimum of 12% conversion, of which the initial 10% was used to determine the initial rate of the reaction. Each experiment was repeated three times and the rates and standard deviations were calculated. Uncertainties are given to one standard deviation. The raw data files are attached as individual Microsoft<sup>®</sup> Excel sheets.

Dependence of Rate of Reaction on Substrate: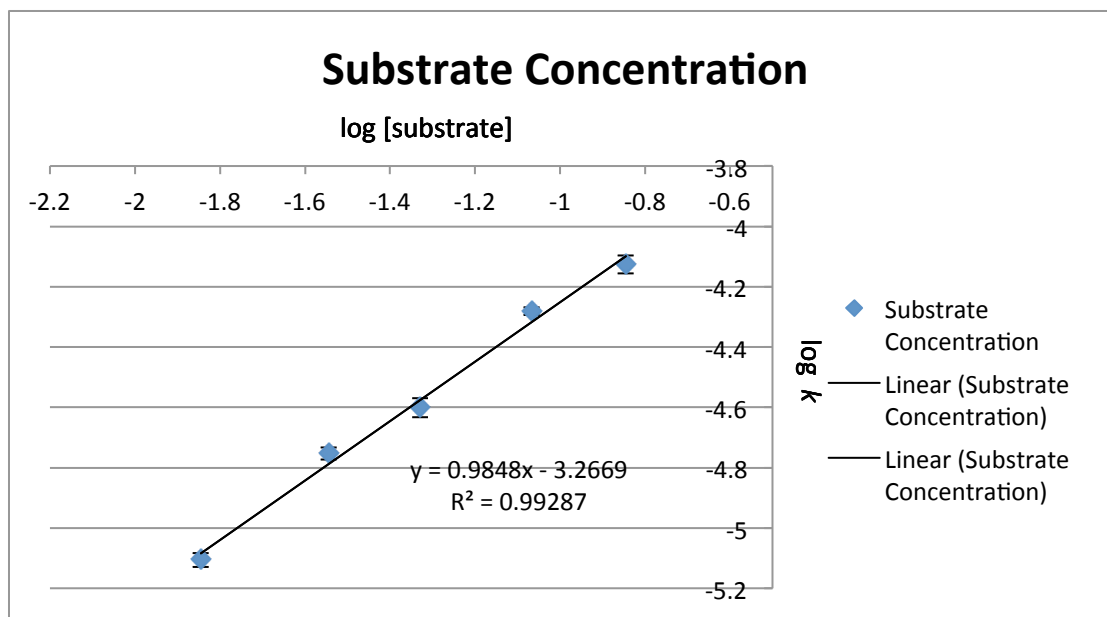

The reaction was found to be first order in substrate.

Dependence of Rate of Reaction on Electrophile: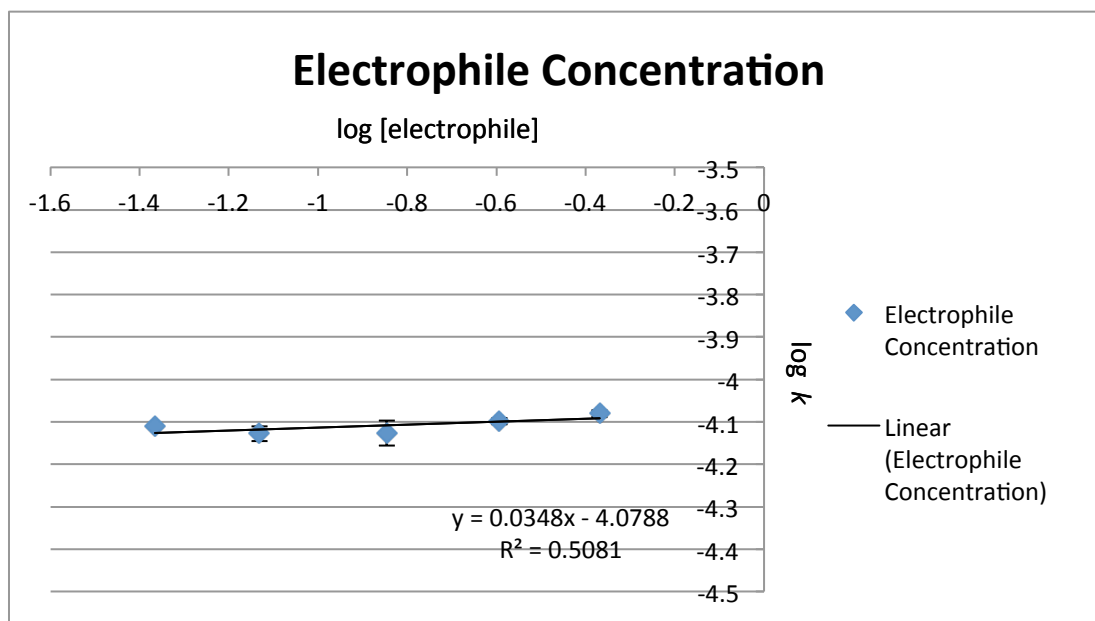

The reaction was found to be zeroth order in electrophile.

Dependence of Rate of Reaction on Catalyst: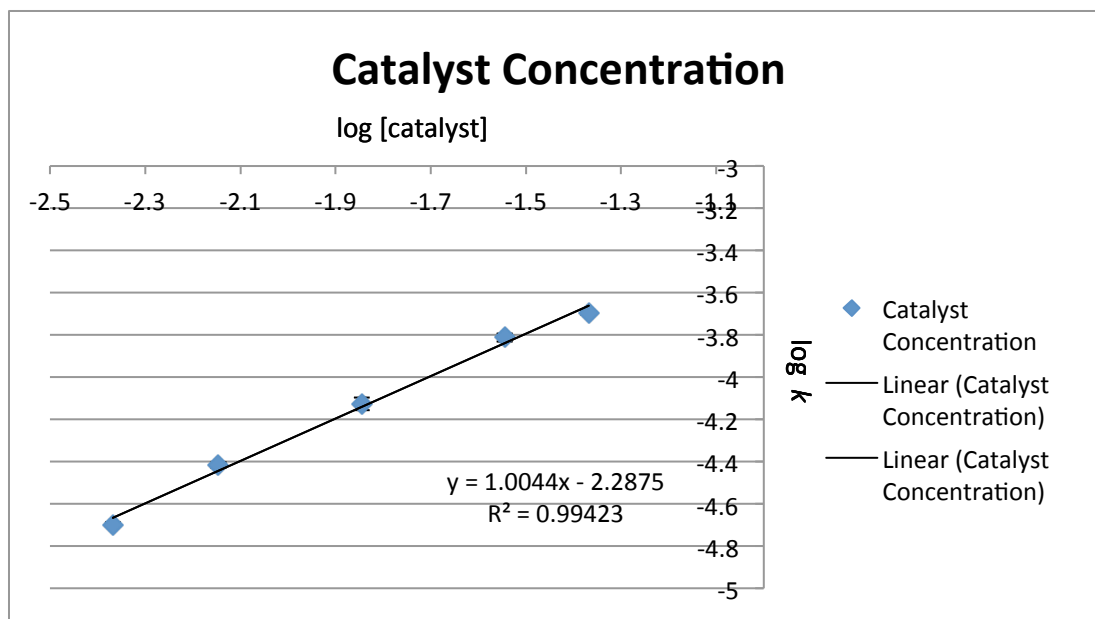

The reaction was found to be first order in catalyst.

Dependence of Rate of Reaction on Acid Concentration: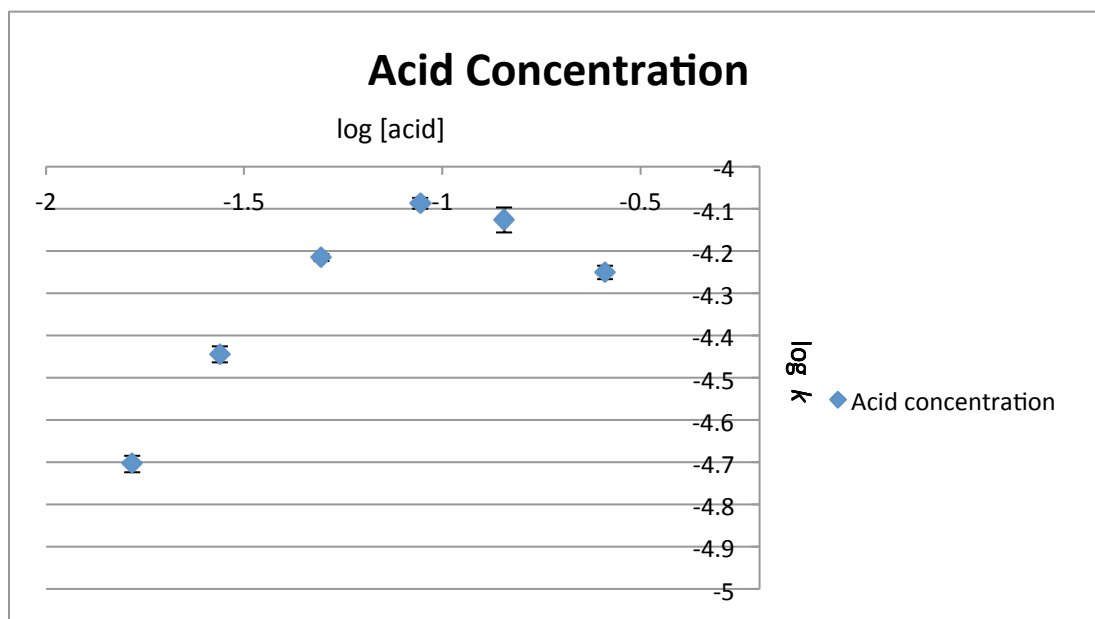

The reaction was found to have a complicated dependence on the acid concentration, possibly as result of a buffering effect of the alcoholic substrate on free MsOH.

## Eyring Analysis of the Activation Energy

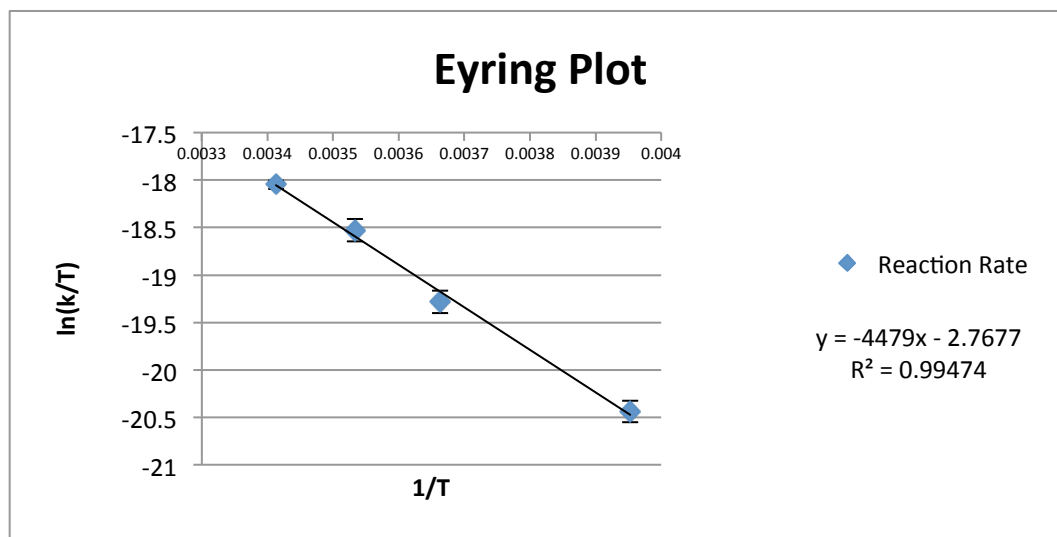

The rates at different temperatures were graphed against  $\ln(k/T)$ . The enthalpy of activation was  $8.9 \pm 0.2$  kcal/mol and the entropy was  $52.7 \pm 0.6$  e.u.

Studies of the Catalytically Active Species **5** (Equations (1)–(3))Reaction of Selenophosphoramidate **S3** with  $[\text{PhS}(\text{SMe}_2)]\text{SbCl}_6$  (Equation (1))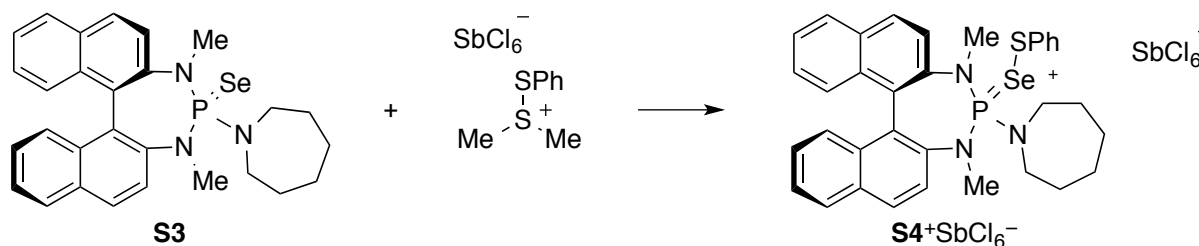

To a solution of **S3** (30 mg 0.06 mmol) in DME (200  $\mu\text{L}$ ) was added  $[\text{PhS}(\text{SMe}_2)]\text{SbCl}_6$  (30 mg, 0.058 mmol). The solution was layered with benzene (1 mL). Precipitation was observed. The solids were partially dissolved in  $\text{CDCl}_3$ . A 4:1 ratio of two  $^{31}\text{P}$  NMR resonances at 62.4 ppm and 58.3 ppm respectively was observed.

**Disproportionation Upon Attempted Crystallization of Active Species S4 (Equation (2))**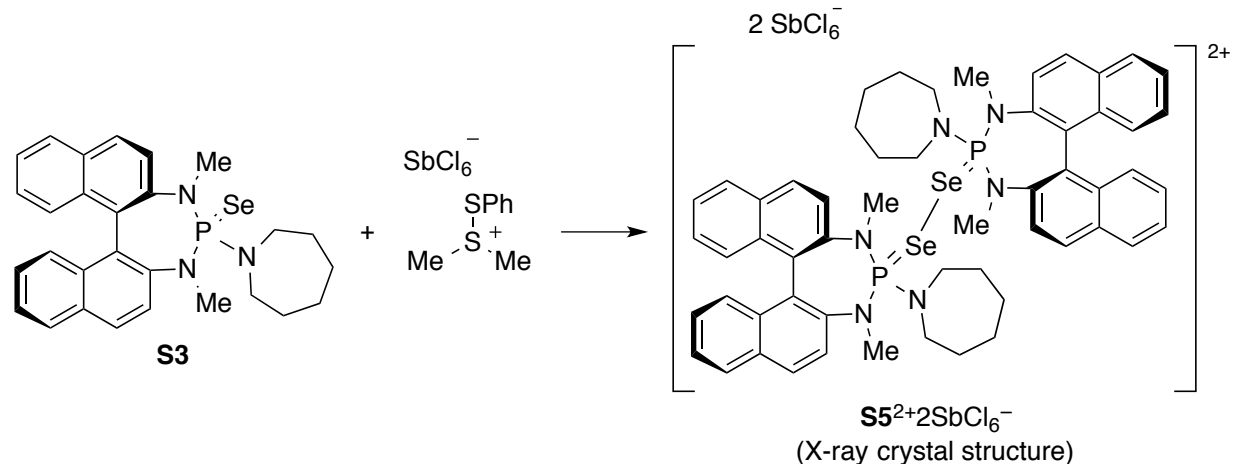

In a glovebox, **S3** (50 mg, 0.098 mmol) and  $[\text{PhS}(\text{SMe}_2)]\text{SbCl}_6$  (48 mg, 0.097 mmol) were added to a 5-mm NMR tube. The material was dissolved in DME (250  $\mu\text{L}$ ) and layered with benzene (1 mL). Upon standing for 24 h, orange, air-stable crystals were observed. These were harvested and submitted for X-ray analysis.

**Reactions of Thiophosphoramidate ( $\pm$ )-**3b** with  $[\text{PhS}(\text{SMe}_2)]\text{SbCl}_6$  (Equation (3))**

With 1.0 equiv  $[\text{PhS}(\text{SMe}_2)]\text{SbCl}_6$ :

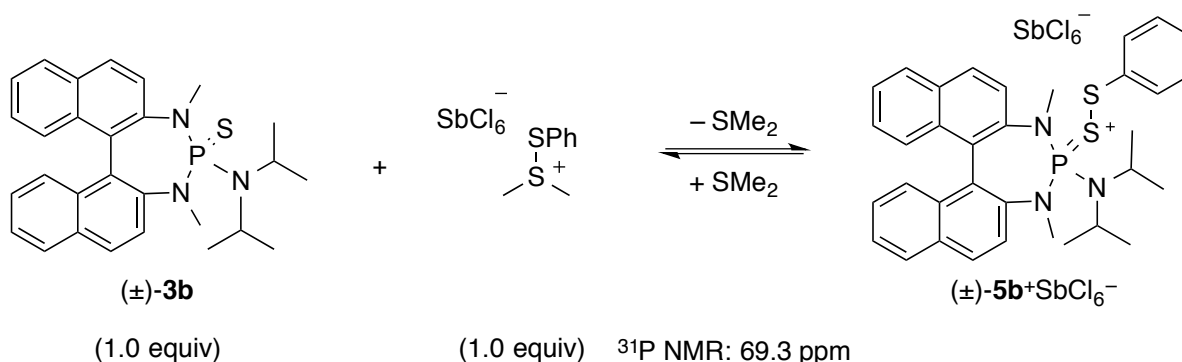

In a glove box, an oven-dried 6 dram vial was charged with ( $\pm$ )-**3b** (15.2 mg, 32.1  $\mu\text{mol}$ ) and  $[\text{PhS}(\text{SMe}_2)]\text{SbCl}_6$  (16.4 mg, 32.4  $\mu\text{mol}$ , 1.01 equiv) and capped with a septum. Outside of the glove box, the vial was connected to a Schlenk line, and  $\text{CD}_3\text{CN}$  (0.50 mL) as well as  $\text{CDCl}_3$  (0.25 mL) were added at room temperature resulting in the formation of a yellow solution. Using a syringe, the mixture was transferred into an oven-dried, 5-mm NMR tube, which had

previously been evacuated and backfilled with argon (2 ×). After 10 min  $^1\text{H}$  and  $^{31}\text{P}$  NMR spectra were recorded.

Data for the equilibrium:

$^1\text{H}$  NMR: (500 MHz,  $\text{CD}_3\text{CN}/\text{CDCl}_3$ , 2:1)

$\delta$  8.13 (d,  $J = 9.6$  Hz, 1H, HC(aryl)), 8.11 (d,  $J = 9.7$  Hz, 1H, H(C-aryl)), 8.02 (d,  $J = 8.4$  Hz, 1H, HC(aryl)), 8.00 (d,  $J = 8.4$  Hz, 1H, HC(aryl)), 7.85 (d,  $J = 9.0$  Hz, 1H, HC(aryl)), 7.72 (d,  $J = 8.9$  Hz, 1H, HC(aryl)), 7.56–7.40 (m, 2H, HC(aryl)), 7.37–7.24 (m, 3H, HC(aryl)), 7.18 (t,  $J = 7.8$  Hz, 2H, HC(aryl)), 7.07 (d,  $J = 8.6$  Hz, 1H, HC(aryl)), 7.04 (d,  $J = 8.6$  Hz, 1H, HC(aryl)), 6.94 (d,  $J = 7.8$  Hz, 2H, HC(aryl)), 3.74–3.59 (m, 2H,  $2 \times \text{NCH}(\text{CH}_3)_2$ ), 3.29 (d,  $J = 13.4$  Hz, 3H,  $\text{NCH}_3$ ), 2.85 (d,  $J = 12.9$  Hz, 3H,  $\text{NCH}_3$ ), 2.23 (s, 6H,  $\text{S}(\text{CH}_3)_2$ ), 1.36 (d,  $J = 7.1$  Hz, 6H,  $\text{NCH}(\text{CH}_3)_2$ ), 1.34 (d,  $J = 6.9$  Hz, 6H,  $\text{NCH}(\text{CH}_3)_2$ )

$^{31}\text{P}$  NMR: (202 MHz,  $\text{CDCl}_3$ )

$\delta$  69.3

With 5.0 equiv  $[\text{PhS}(\text{SMe}_2)]\text{SbCl}_6^-$ :

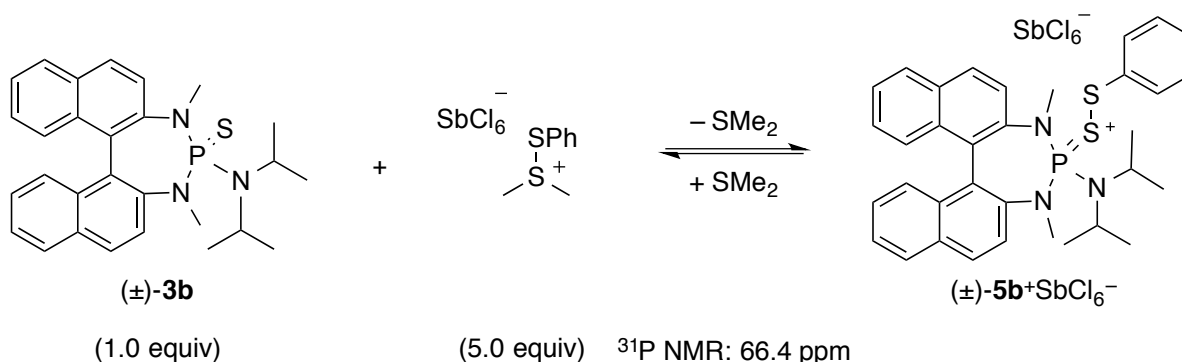

In a glove box, an oven-dried 6 dram vial was charged with  $(\pm)\text{-3b}$  (7.10 mg, 15.0  $\mu\text{mol}$ ) and  $[\text{PhS}(\text{SMe}_2)]\text{SbCl}_6^-$  (37.9 mg, 74.9  $\mu\text{mol}$ , 4.99 equiv) and capped with a septum. Outside of the glove box, the vial was connected to a Schlenk line, and  $\text{CD}_3\text{CN}$  (0.50 mL) as well as  $\text{CDCl}_3$  (0.25 mL) were added at room temperature resulting in the formation of a turbid, yellow solution. Using a syringe, the mixture was transferred into an oven-dried, 5-mm NMR tube, which had previously been evacuated and backfilled with argon (2 ×). After 10 min  $^1\text{H}$  and  $^{31}\text{P}$  NMR spectra were recorded.

Data for the equilibrium: $^1\text{H}$  NMR: (500 MHz,  $\text{CD}_3\text{CN}/\text{CDCl}_3$ , 2:1)

$\delta$  8.18 (d,  $J = 9.5$  Hz, 1H, HC(aryl)), 8.16 (d,  $J = 10.0$  Hz, 1H, HC(aryl)), 7.91 (d,  $J = 8.9$  Hz, 1H, HC(aryl)), 7.74 (d,  $J = 9.0$  Hz, 1H, HC(aryl)), 7.71–7.48 (m, 24H, HC(aryl)), 7.37–7.26 (m, 3H, HC(aryl)), 7.07 (d,  $J = 8.4$  Hz, 1H, HC(aryl)), 7.06 (d,  $J = 8.3$  Hz, 1H, HC(aryl)), 3.79–3.67 (m, 2H,  $2 \times \text{NCH}(\text{CH}_3)_2$ ), 3.34 (d,  $J = 13.5$  Hz, 3H,  $\text{NCH}_3$ ), 2.76 (d,  $J = 13.2$  Hz, 3H,  $\text{NCH}_3$ ), 2.71 (s, 30H,  $\text{S}(\text{CH}_3)_2$ ), 1.36 (d,  $J = 6.8$  Hz, 6H,  $\text{NCH}(\text{CH}_3)_2$ ), 1.35 (d,  $J = 6.7$  Hz, 6H,  $\text{NCH}(\text{CH}_3)_2$ )

 $^{31}\text{P}$  NMR: (202 MHz,  $\text{CDCl}_3$ ) $\delta$  66.4With 0.2 equiv  $[\text{PhS}(\text{SMe}_2)]\text{SbCl}_6^-$ :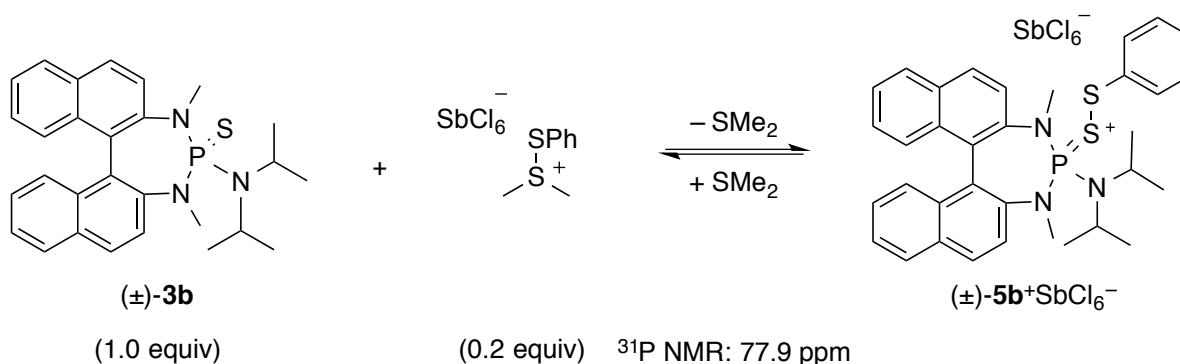

In a glove box, an oven-dried 6 dram vial was charged with  $(\pm)\text{-3b}$  (35.7 mg, 75.3  $\mu\text{mol}$ ) and  $[\text{PhS}(\text{SMe}_2)]\text{SbCl}_6^-$  (7.6 mg, 15  $\mu\text{mol}$ , 0.20 equiv) and capped with a septum. Outside of the glove box, the vial was connected to a Schlenk line, and  $\text{CD}_3\text{CN}$  (0.50 mL) as well as  $\text{CDCl}_3$  (0.25 mL) were added at room temperature resulting in the formation of a turbid, yellow suspension. Using a syringe, the mixture was transferred into an oven-dried, 5-mm NMR tube that had previously been evacuated and backfilled with argon ( $2 \times$ ). After 10 min  $^1\text{H}$  and  $^{31}\text{P}$  NMR spectra were recorded. Since  $(\pm)\text{-3b}$  did not completely dissolve under these conditions, the actual ratio of the two reactants in solution was determined to be:  $(\pm)\text{-3b}/[\text{PhS}(\text{SMe}_2)]\text{SbCl}_6^- \approx 3.5:1$ .

Data for the equilibrium:



$^1\text{H}$  NMR: (500 MHz,  $\text{CD}_3\text{CN}/\text{CDCl}_3$ , 2:1)

$\delta$  8.05 (d,  $J = 8.0$  Hz, 1H, HC(aryl)), 8.04 (d,  $J = 7.9$  Hz, 1H, HC(aryl)), 7.96 (d,  $J = 8.0$  Hz, 1H, HC(aryl)), 7.95 (d,  $J = 7.4$  Hz, 1H, HC(aryl)), 7.75 (d,  $J = 8.8$  Hz, 1H, HC(aryl)), 7.74 (d,  $J = 8.9$  Hz, 1H, HC(aryl)), 7.48–7.37 (m, 2H, H(C-aryl)), 7.30–7.07 (m, 4H, HC(aryl)), 6.96 (d,  $J = 8.4$  Hz, HC(aryl)), 6.82 (d,  $J = 7.7$  Hz, HC(aryl)), 3.59–3.42 (m, 2H,  $2 \times \text{NCH}(\text{CH}_3)_2$ ), 3.17 (d,  $J = 13.4$  Hz, 3H,  $\text{NCH}_3$ ), 3.09 (d,  $J = 12.2$  Hz, 3H,  $\text{NCH}_3$ ), 2.11 (s,  $\text{S}(\text{CH}_3)_2$ ), 1.39 (br s, 6H,  $\text{NCH}(\text{CH}_3)_2$ ), 1.31 (br s, 6H,  $\text{NCH}(\text{CH}_3)_2$ )

$^{31}\text{P}$  NMR: (202 MHz,  $\text{CDCl}_3$ )

$\delta$  77.9

**Preparation of *N,N*-Diisopropyl-3,5-dimethyl-4-(2-phenyl- $1\lambda^3$ -disulfanyl-*idene*)-3,5-dihydro-4 $\lambda^5$ -dinaphtho[2,1-*d*:1',2'-*f*][1,3,2]diazaphosphepin-4-amine, tetrakis(3,5-bis(trifluoromethyl) phenyl)borate salt (( $\pm$ )-**5b**<sup>+</sup>BARF<sub>24</sub><sup>-</sup>) (Figure 3a)**

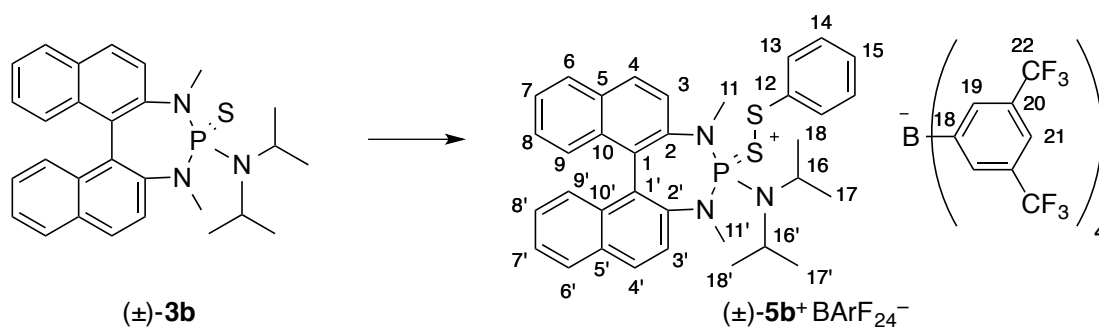

An oven-dried, two-necked, round-bottomed flask equipped with a magnetic stir bar was charged with ( $\pm$ )-**3b** (146 mg, 0.308 mmol) and  $\text{NaBARF}_{24}$  (273 mg, 0.308 mmol, 1.00 equiv). The flask was evacuated, backfilled with argon (2  $\times$ ) and  $\text{CH}_2\text{Cl}_2$  (5.0 mL) was added resulting in the formation of a white suspension. The reaction mixture was cooled to 0  $^\circ\text{C}$  (external temperature) using an ice/water bath, and  $\text{PhSCl}$  (35.0  $\mu\text{L}$ , 0.304 mmol, 0.99 equiv) was added neat affording a brown, turbid solution. The mixture was stirred at 0  $^\circ\text{C}$  for 10 min and warmed to room temperature. Stirring was continued for 1 h during which the formation of a fine precipitate ( $\text{NaCl}$ ) was observed. A second oven-dried, two-neck round-bottom flask was evacuated and backfilled with argon (1  $\times$ ) and used as a receiver flask for transferring the supernatant from the reaction flask. The transfer of the supernatant was accomplished using a

syringe cannula. For that purpose, the end of the cannula (where usually the syringe is attached) was wrapped with a glass fiber filter (Fisher brand, G6), which was tied up with Teflon tape. This end was put into the reaction flask (without touching the suspension yet) and the sharp end was placed into the receiver flask. To moisten the glass fiber filter, CH<sub>2</sub>Cl<sub>2</sub> (2.0 mL) was added to the receiver flask and transferred into the reaction flask. After this, the supernatant was transferred from the reaction flask into the receiver flask (by applying vacuum to the receiver flask). The reaction flask was rinsed with CH<sub>2</sub>Cl<sub>2</sub> (2 × 3 mL) and the washings were transferred to the receiver flask. The cannula was removed from the receiver flask and the solvent was evaporated slowly (using the vacuum from the Schlenk line) to give a brown oil. Pentane (5.0 mL) was added and removed on high vacuum to give (±)-**5b**<sup>+</sup> BArF24<sup>-</sup> (399 mg, 90%) as a pale yellow, fluffy solid. Crystals suitable for single crystal X-ray diffraction were obtained by dissolving (±)-**5b**<sup>+</sup> BArF24<sup>-</sup> (120 mg) in CH<sub>2</sub>Cl<sub>2</sub> (70 μL) followed by slow evaporation of the solvent at room temperature.

Data for (±)-**5b**<sup>+</sup> BArF24<sup>-</sup>:

<sup>1</sup>H NMR: (500 MHz, CDCl<sub>3</sub>)

δ 8.13 (d, *J* = 9.0 Hz, 1H, HC(4,4')), 8.05 (d, *J* = 9.0 Hz, 1H, HC(4',4)), 8.01 (d, *J* = 8.1 Hz, 1H, HC(6,6')), 7.93 (d, *J* = 8.1 Hz, 1H, HC(6',6)), 7.74 (d, *J* = 9.2 Hz, 1H, HC(aryl)), 7.75 (br s, 8H, HC(19)), 7.61–7.48 (m, 3H, HC(aryl)), 7.55 (br s, 4H, HC(21)), 7.39 (t, *J* = 7.7 Hz, 1H, HC(aryl)), 7.32 (t, *J* = 7.6 Hz, 1H, HC(aryl)), 7.19 (t, *J* = 7.5 Hz, 1H, HC(aryl)), 7.12 (t, *J* = 8.4 Hz, 2H, HC(aryl)), 7.03 (t, *J* = 7.8 Hz, 2H, HC(aryl)), 6.71 (d, *J* = 7.8 Hz, 2H, HC(aryl)), 3.72–3.57 (m, 2H, HC(16), HC(16')), 3.33 (d, *J* = 13.4 Hz, 3H, HC(11,11')), 2.69 (d, *J* = 13.2 Hz, 3H, HC(11',11)), 1.32 (d, *J* = 6.8 Hz, 6H, HC(17,17')), 1.30 (d, *J* = 6.9 Hz, 6H, HC(18,18'))

<sup>13</sup>C NMR: (125 MHz, CDCl<sub>3</sub>)

δ 161.8 (q, *J* = 49.9 Hz, C(20)), 138.7 (C(aryl)), 137.4 (C(aryl)), 134.8 (C(aryl)), 134.2 (C(aryl)), 132.8 (C(aryl)), 132.6 (C(aryl)), 132.5 (C(aryl)), 132.1 (C(aryl)), 131.8 (C(aryl)), 131.6 (C(aryl)), 131.5 (C(aryl)), 131.4 (C(aryl)), 130.6 (C(aryl)), 129.7 (C(aryl)), 128.9 (qq, *J* = 32.8, 2.9 Hz, C(19)), 128.6 (C(aryl)), 128.4 (C(aryl)), 127.9 (C(aryl)), 127.6 (C(aryl)), 127.2 (C(aryl)), 125.7 (C(aryl)), 124.6 (q, *J* = 272 Hz, C(22)), 122.3 (C(aryl)), 120.4 (C(aryl)), 117.5 (C(aryl)), 50.5 (C(16), C(16')),

37.9 (br s, C(11,11')), 37.7 (d,  $J = 11.0$  Hz, C(11',11)), 23.8 (C(17)), 23.0 (C(18))

$^{31}\text{P}$  NMR: (202 MHz,  $\text{CDCl}_3$ )

$\delta$  65.8

### Stoichiometric Sulfoetherification of **1b** Using Active Species $(\pm)\text{-5b}^+\text{BARF}_{24}^-$ (Figure 3a)

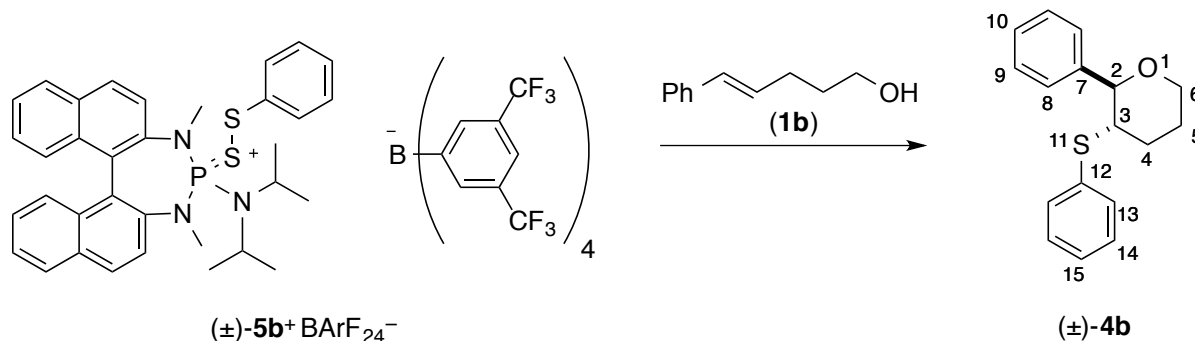

An oven-dried, 5-mm NMR tube was charged with  $(\pm)\text{-5b}^+\text{BARF}_{24}^-$  (95 mg, 66  $\mu\text{mol}$ , 1.1 equiv) and  $\text{CDCl}_3$  (0.70 mL) affording a brown solution. At room temperature, substrate **1b** (10 mg, 62  $\mu\text{mol}$ ) was added neat using a syringe, and the tube was shaken well. The reaction mixture was kept at room temperature and conversion was monitored by the appearance of a diagnostic  $^1\text{H}$  NMR resonance for the product at 4.14 ppm (doublet) with respect to the alkene peaks of the substrate at 6.23 and 6.43 ppm. After 17 h at room temperature, the reaction proceeded to 90% conversion, and no further consumption of substrate **1b** was observed. The reaction was quenched by addition of  $\text{Et}_3\text{N}$  (0.10 mL) and the crude product was purified by flash column chromatography ( $\text{SiO}_2$ , 8.0 g, 10 mm  $\varnothing$ , hexane/ $\text{EtOAc}$ , 60:1) to give 12 mg of a 5:1 mixture of  $(\pm)\text{-4b}$  and Lewis base  $(\pm)\text{-3b}$ . The spectroscopic data of  $(\pm)\text{-4b}$  match those published in the literature.<sup>16</sup>

#### Data for $(\pm)\text{-4b}$ :

$^1\text{H}$  NMR: (500 MHz,  $\text{CDCl}_3$ )

$\delta$  7.39–7.35 (m, 2H, HC(8)), 7.31–7.23 (m, 3H, HC(9), HC(10)), 7.16–7.09 (m, 5H, HC(aryl)), 4.20 (d,  $J = 10.1$  Hz, 1H, HC(2)), 4.12–4.06 (m, 1H, HC(6)), 3.57 (ddd,  $J = 12.9, 12.1, 2.1$  Hz, 1H, HC(6)), 3.24 (ddd,  $J = 11.5, 10.1, 4.0$  Hz, 1H, HC(3)), 2.33–2.26 (m, 1H, HC(4)), 1.92–1.80 (m, 1H, HC(5)), 1.76–1.63 (m, 2H, HC(4), HC(5))

## Synthesis of Sulfenylating Agents

### Synthesis of Thiophenols

#### Preparation of 2,6-Diethylthiophenol (S7)

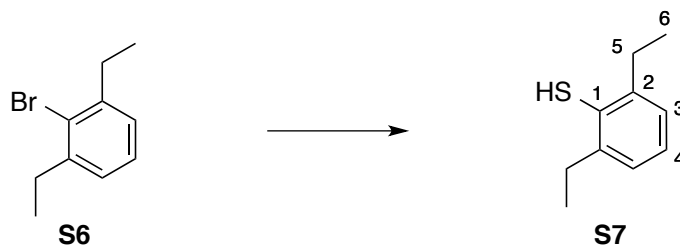

Thiophenol **S7** was prepared by analogy to a literature procedure used for the synthesis of sterically hindered thiophenols.<sup>17</sup> An oven-dried, three-necked, round-bottomed flask equipped with a magnetic stir bar, a condenser, a dropping funnel and an argon inlet was charged with magnesium filings (502 mg, 20.7 mmol, 1.10 equiv). The apparatus was evacuated, backfilled with argon, and the magnesium filings were covered with THF (6.0 mL). After the addition of a chip of I<sub>2</sub>, a solution of 1-bromo-2,6-diethylbenzene (**S6**)<sup>9</sup> (4.00 g, 18.8 mmol) in THF (30 mL) was added dropwise at a rate to maintain the reaction mixture warm. After complete addition, the mixture was heated to reflux for 3 h and then was cooled to room temperature. Sulfur powder (632 mg, 19.7 mmol, 1.05 equiv) was added in several portions over 10 min and the mixture was heated to reflux for another 1.5 h. Upon cooling to room temperature, a suspension of LiAlH<sub>4</sub> (358 mg, 9.38 mmol, 0.50 equiv) in THF (6.0 mL) was added dropwise to the brown-yellow reaction mixture until decoloration occurred. The mixture was heated to reflux for 30 min, then was cooled to 0 °C and quenched by *cautious* addition of H<sub>2</sub>O. Aqueous HCl (2.0 M) was added until good phase separation was observed. The phases were separated and the aqueous phase extracted with Et<sub>2</sub>O (3 × 20 mL). The combined organic layers were washed with brine (30 mL), dried over MgSO<sub>4</sub> and concentrated in vacuo (20–23 °C, 20 mmHg). Purification by fractional distillation afforded **S7** (2.47 g, 79%) as a colorless oil. The analytical data match those published in the literature.<sup>18</sup>

#### Data for **S7**:

bp: 79 °C (0.3 mm Hg)

<sup>1</sup>H NMR: (500 MHz, CDCl<sub>3</sub>)

δ 7.14–7.06 (m, 3H, HC(3), HC(4)), 3.26 (s, 1H, HS), 2.78 (q, *J* = 7.5 Hz, 4H, HC(5)), 1.28 (t, *J* = 7.5 Hz, 6H, HC(6))

$^{13}\text{C}$  NMR: (125 MHz,  $\text{CDCl}_3$ )

$\delta$  142.6 (C(2)), 129.2 (C(1)), 126.2 (C(3)), 125.7 (C(4)), 28.5 (C(5)), 14.0 (C(6))

MS: ( $\text{ES}^+$ , 70 eV)

166 (100,  $\text{M}^+$ ), 151 (69), 136 (37), 117 (17), 105 (14), 91 (11), 77 (7)

### Preparation of 2,6-Diisopropylthiophenol (**S9**)

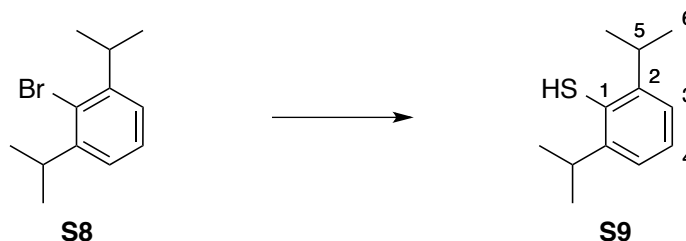

Following the protocol described above for the synthesis of thiophenol **S7**, the Grignard reagent was prepared from magnesium filings (1.78 g, 73.3 mmol, 1.10 equiv) in THF (21 mL) and a solution of 1-bromo-2,6-diisopropylbenzene (**S8**)<sup>10</sup> (16.1 g, 66.8 mmol) in THF (107 mL). After addition of sulfur powder (2.25 g, 70.2 mmol, 1.05 equiv), the mixture was heated to reflux for 2 h. Upon cooling to room temperature, a suspension of  $\text{LiAlH}_4$  (1.27 g, 33.4 mmol, 0.50 equiv) in THF (21 mL) was added dropwise to the brown-yellow reaction mixture until decoloration occurred. The mixture was refluxed for another 30 min and worked up as described above (adjusting the amounts of HCl,  $\text{Et}_2\text{O}$  and brine proportionally to the given scale). Purification by fractional distillation afforded **S7** (10.6 g, 82%) as a colorless oil. The spectroscopic data match those published in the literature.<sup>19</sup>

Data for **S9**:

bp: 81 °C (0.3 mm Hg)

$^1\text{H}$  NMR: (500 MHz,  $\text{CDCl}_3$ )

$\delta$  7.23–7.13 (m, 3H, HC(3), HC(4)), 3.49 (hept,  $J = 6.9$  Hz, 2H, HC(5)), 3.23 (s, 1H, HS), 1.28 (d,  $J = 6.9$  Hz, 12H, HC(6))

$^{13}\text{C}$  NMR: (125 MHz,  $\text{CDCl}_3$ )

$\delta$  147.8 (C(2)), 127.7(C(1)), 126.4(C(4)), 123.1(C(3)), 31.8 (C(5)), 23.1 (C(6))

MS: ( $\text{ES}^+$ , 70 eV)

194 (79,  $\text{M}^+$ ), 179 (100), 151 (14), 137 (52), 115 (10), 91 (6)

**Preparation of 3,5-Diisopropylthiophenol (S11)**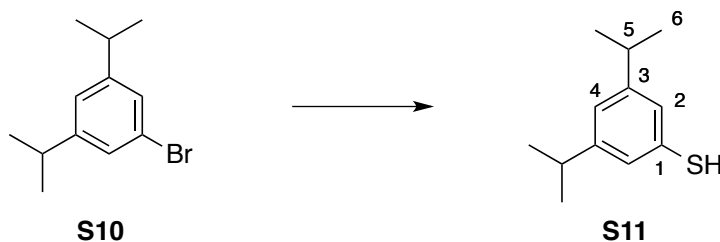

Following the protocol described above for the synthesis of thiophenol **S7**, the Grignard reagent was prepared from magnesium filings (134 mg, 5.51 mmol, 1.10 equiv) in THF (1.6 mL) and a solution of 1-bromo-3,5-diisopropylbenzene (**S10**)<sup>11</sup> (1.20 g, 5.00 mmol) in THF (8.0 mL). After addition of sulfur powder (168 mg, 5.25 mmol, 1.05 equiv), the mixture was heated to reflux for 2 h. Upon cooling to room temperature, a suspension of LiAlH<sub>4</sub> (95 mg, 2.5 mmol, 0.50 equiv) in THF (1.6 mL) was added dropwise to the brown/yellow reaction mixture until decoloration occurred. The mixture was refluxed for another 30 min and worked up as described above (adjusting the amounts of HCl, Et<sub>2</sub>O and brine proportionally to the given scale). Purification by flash column chromatography (SiO<sub>2</sub>, 42 g, 35 mm Ø, hexane) afforded pure **S11** (628 mg, 65%) as a colorless oil.

**Data for S11:**

<sup>1</sup>H NMR: (500 MHz, CDCl<sub>3</sub>)

δ 6.98 (d, *J* = 1.5 Hz, 2H, HC(2)), 6.88 (d, *J* = 1.6 Hz, 1H, HC(4)), 3.41 (s, 1H, HS), 2.84 (hept, *J* = 6.9 Hz, 2H, HC(5)), 1.24 (d, *J* = 6.9 Hz, 12H, HC(6))

<sup>13</sup>C NMR: (125 MHz, CDCl<sub>3</sub>)

δ 149.9 (C(3)), 129.9 (C(1)), 125.0 (C(2)), 122.6 (C(4)), 34.1 (C(5)), 23.9 (C(6))

MS: (ES<sup>+</sup>, 70 eV)

194 (86, M<sup>+</sup>), 179 (100), 161 (16), 151 (19), 137 (27), 115 (8), 91 (9)

**Preparation of 2,6-Diisopropoxythiophenol (S13)**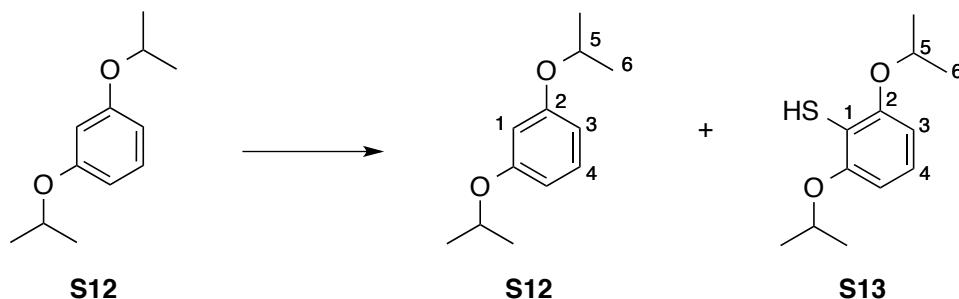

An oven-dried, three-necked, round-bottomed flask equipped with a magnetic stir bar, a condenser and an argon inlet was evacuated and backfilled with argon (2 ×). The flask was charged with 1,3-diisopropoxybenzene<sup>12</sup> (1.00 g, 5.15 mmol, 1.10) and hexane (10 mL). At room temperature, *n*-BuLi (2.45 M solution in hexanes, 2.29 mL, 5.62 mmol, 1.20 equiv) was added dropwise, and the mixture was heated to reflux for 2.5 h. After cooling to room temperature, a suspension of sulfur powder (150 mg, 4.68 mmol, 1.00 equiv) in toluene (4 mL) was added and the mixture was heated to reflux for 16 h. Upon cooling to room temperature, H<sub>2</sub>O (15 mL) and then aqueous HCl (2.0 M) was added, the phases were separated and the aqueous phase was extracted with EtOAc (3 × 20 mL). The combined organic layers were washed with brine (20 mL), dried over MgSO<sub>4</sub> and concentrated in vacuo (20–23 °C, 20 mmHg) affording 1.00 g of a 2:1 mixture of thiophenol **S13** and starting material **S12**. Attempts to separate the mixture by flash column chromatography were unsuccessful so that the mixture was used for the synthesis of corresponding sulfenylating agent **2k**.

Data for **S13**:

<sup>1</sup>H NMR: (500 MHz, CDCl<sub>3</sub>)

δ 6.98 (t, *J* = 8.3 Hz, 1H, HC(4)), 6.52 (d, *J* = 8.3 Hz, 2H, HC(3)), 4.57 (hept, *J* = 6.1 Hz, 2H, HC(5)), 4.10 (s, 1H, HS), 1.37 (d, *J* = 6.1 Hz, 12H, HC(6))

<sup>13</sup>C NMR: (125 MHz, CDCl<sub>3</sub>)

δ 154.0 (C(2)), 126.4 (C(1)), 124.4 (C(4)), 106.5 (C(3)), 71.5 (C(5)), 22.3 (C(6))

MS: (ES<sup>+</sup>, 70 eV)

226 (31, M<sup>+</sup>), 184 (5), 142 (100), 113 (8)

**Data for S12:**

<sup>1</sup>H NMR: (500 MHz, CDCl<sub>3</sub>)

δ 7.14 (t, *J* = 8.1 Hz, 1H, HC(4)), 6.49–6.40 (m, 3H, HC(1)), HC(3)), 4.52 (hept, *J* = 6.1 Hz, 2H, HC(5)), 1.33 (d, *J* = 6.0 Hz, 12H, HC(6))

<sup>13</sup>C NMR: (125 MHz, CDCl<sub>3</sub>)

δ 159.1 (C(2)), 129.7 (C(4)), 107.9 (C(3)), 104.0 (C(1)), 69.8 (C(5)), 22.1 (C(6))

**General Procedure 1: Synthesis of Sulfenylating Agents**

The synthesis of sulfenylating agents was accomplished following a procedure from Reese<sup>20</sup> (conditions and yields have not been optimized for the individual sulfenylating agent). An oven-dried, three-necked, round-bottomed flask equipped with a magnetic stir bar, a dropping funnel and a gas outlet (to the rear of the hood) was charged with phthalimide and the corresponding thiophenol (1.05 equiv). MeCN (2.6 M) and pyridine (1.3 M) were added and the white suspension was heated to 80 °C (bath temperature) for 5 min resulting in a colorless solution. The mixture was cooled to 0 °C (internal temperature: 5 °C) forming a white suspension again. At this point, a solution of Br<sub>2</sub> (1.10 equiv) in MeCN (2.2 M) was added dropwise over a period of 1 h maintaining the internal temperature below 8 °C. Upon complete addition, the reaction mixture was stirred at 0 °C for the indicated time. Then, H<sub>2</sub>O was added dropwise over 30 min, stirring was stopped, and the mixture was allowed to stand for 20 min at 0 °C. The resulting suspension was filtered using a glass frit and the solid product was washed with pre-cooled MeOH (0 °C, 4 ×) affording the crude product. Purification was accomplished by silica gel column chromatography and/or recrystallization.

**Preparation of 2-((4-Methoxyphenyl)thio)isoindoline-1,3-dione (2b)**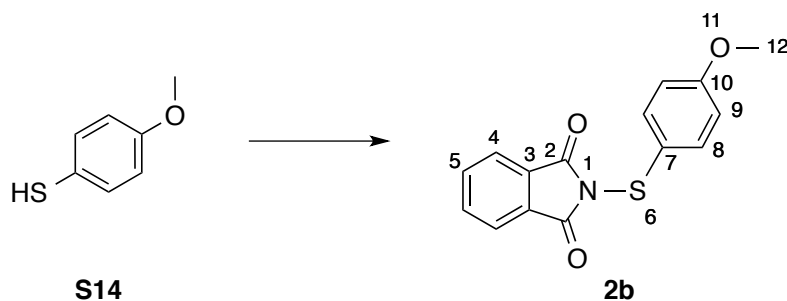

Following General Procedure 1, a suspension of phthalimide (999 mg, 6.79 mmol) and 4-methoxythiophenol (**S14**) (1.00 g, 7.13 mmol, 1.05 equiv) in MeCN (4.5 mL) and pyridine



(5.7 mL) was treated with a solution of Br<sub>2</sub> (0.40 mL, 7.8 mmol, 1.1 equiv) in MeCN (3.5 mL). Upon complete addition of the Br<sub>2</sub> solution, the mixture was stirred for 1 h at 0 °C and was subsequently quenched by dropwise addition of H<sub>2</sub>O (25 mL). Filtration of the suspension and washing of the precipitate with pre-cooled MeOH (0 °C, 4 × 8 mL) yielded pure **2b** (1.76 g, 91%) as a yellow solid. Further purification was achieved by recrystallization from a hexane/CH<sub>2</sub>Cl<sub>2</sub> mixture. The spectroscopic data match those published in the literature.<sup>21</sup>

Data for **2b**:

mp: 202–204 °C (hexane/CH<sub>2</sub>Cl<sub>2</sub>)

<sup>1</sup>H NMR: (500 MHz, CDCl<sub>3</sub>)

δ 7.88 (dd, *J* = 5.5, 3.1 Hz, 2H, HC(4)), 7.76 (d, *J* = 8.8 Hz, 2H, HC(8)), 7.73 (dd, *J* = 5.5, 3.1 Hz, 2H, HC(5)), 6.84 (d, *J* = 8.8 Hz, 2H, HC(9)), 3.77 (s, 3H, HC(12))

<sup>13</sup>C NMR: (125 MHz, CDCl<sub>3</sub>)

δ 167.8 (C(2)), 161.4 (C(10)), 136.6 (C(8)), 134.5 (C(5)), 132.1 (C(3)), 125.4 (C(7)), 123.8 (C(4)), 114.6 (C(9)), 55.4 (C(12))

IR: (neat)

1778 (m), 1729 (s), 1704 (s), 1588 (m), 1567 (m), 1492 (m), 1466 (m), 1447 (m), 1408 (w), 1362 (w), 1345 (m), 1299 (m), 1276 (s), 1252 (s), 1171 (m), 1104 (w), 1089 (m), 1047 (s), 1025 (s), 866 (m), 831 (s), 800 (m), 711 (s)

MS: (ES<sup>+</sup>, 70 eV)

285 (100, M<sup>+</sup>), 270 (11), 139 (32)

HRMS: calcd for C<sub>15</sub>H<sub>12</sub>NO<sub>3</sub>S<sup>+</sup>: 286.0538, found: 286.0538

TLC: R<sub>f</sub> 0.24 (hexane/EtOAc, 4:1) [CAM]

**Preparation of 2-((4-(Trifluoromethyl)phenyl)thio)isoindoline-1,3-dione (**2c**)**

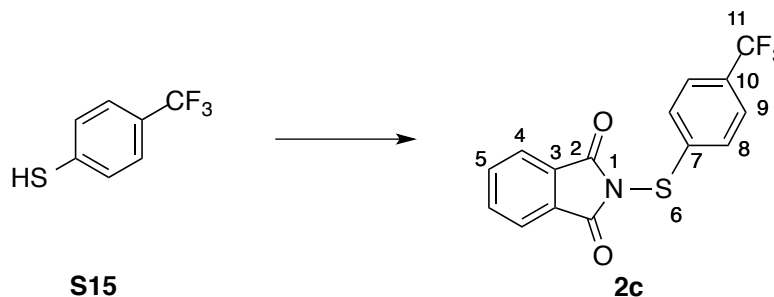

Following General Procedure 1, a suspension of phthalimide (547 mg, 3.72 mmol) and 4-(trifluoromethyl)thiophenol (**S15**) (696 mg, 3.91 mmol, 1.05 equiv) in MeCN (2.5 mL) and

pyridine (3.0 mL) was treated with a solution of Br<sub>2</sub> (0.23 mL, 4.5 mmol, 1.2 equiv) in MeCN (1.8 mL). Upon complete addition of the Br<sub>2</sub> solution, the mixture was stirred for 1 h at 0 °C and subsequently quenched by dropwise addition of H<sub>2</sub>O (15 mL). Filtration of the suspension and washing of the precipitate with pre-cooled MeOH (0 °C, 3 × 6 mL) afforded the crude product that was purified by column chromatography (SiO<sub>2</sub>, 65 g, 45 mm Ø, hexane/EtOAc/CH<sub>2</sub>Cl<sub>2</sub>, 5:1:1) yielding pure **2c** (516 mg, 43%) as an off-white solid. Further purification was achieved by recrystallization from a hexane/CH<sub>2</sub>Cl<sub>2</sub> mixture.

Data for 2c:

mp: 152–154 °C (hexane/CH<sub>2</sub>Cl<sub>2</sub>)

<sup>1</sup>H NMR: (500 MHz, CDCl<sub>3</sub>)

δ 7.97 (dd, *J* = 5.5, 3.1 Hz, 2H, HC(4)), 7.83 (dd, *J* = 5.5, 3.1 Hz, 2H, HC(5)), 7.59–7.48 (m, 4H, HC(8), HC(9))

<sup>13</sup>C NMR: (125 MHz, CDCl<sub>3</sub>)

δ 167.3 (C(2)), 140.1 (C(7)), 135.0 (C(5)), 131.8 (C(3)), 130.3 (q, *J* = 32.8 Hz, C(10)), 127.9 (C(8)), 126.20 (q, *J* = 3.7 Hz, C(9)), 124.3 (C(4)), 123.7 (q, *J* = 272 Hz, C(11))

<sup>19</sup>F NMR: (470 MHz, CDCl<sub>3</sub>)

δ –63.2

IR: (neat)

1790 (m), 1744 (s), 1716 (s), 1607 (m), 1499 (w), 1468 (m), 1403 (m), 1357 (w), 1324 (s), 1274 (s), 1263 (m), 1167 (m), 1110 (s), 1090 (s), 1062 (s), 1036 (s), 1009 (m), 970 (w), 950 (w), 866 (m), 833 (m), 825 (m), 788 (m), 707 (s)

MS: (ES<sup>+</sup>, 70 eV)

323 (58, M<sup>+</sup>), 281 (64), 253 (13), 207 (100), 191 (15), 178 (25), 157 (11), 147 (12), 96 (20)

HRMS: calcd for C<sub>15</sub>H<sub>9</sub>NO<sub>2</sub>SF<sub>3</sub><sup>+</sup>: 324.0306, found: 324.0297

TLC: R<sub>f</sub> 0.29 (hexane/EtOAc, 4:1) [KMnO<sub>4</sub>]

**Preparation of 2-((4-Nitrophenyl)thio)isoindoline-1,3-dione (2d)**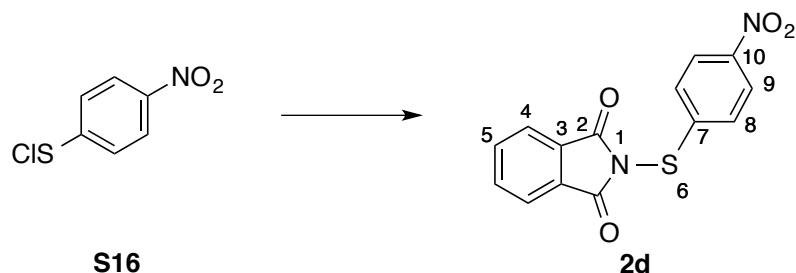

Synthesis of title compound **2d** from 4-nitrothiophenol and phthalimide following General Procedure 1 did not provide satisfactory results with regard to yield and level of purity. Therefore, a different procedure using 4-nitrobenzenesulfonyl chloride (**S16**) as the starting material was employed: An oven-dried, three-necked, round-bottomed flask equipped with a magnetic stir bar and a gas inlet was evacuated and backfilled with argon. The flask was charged with phthalimide (234 mg, 1.58 mmol), Et<sub>3</sub>N (0.29 mL, 2.05 mmol, 1.30 equiv) and CH<sub>2</sub>Cl<sub>2</sub> (2.0 mL), and a solution of 4-nitrobenzenesulfonyl chloride (**S16**) (360 mg, 1.90 mmol, 1.20 equiv) in CH<sub>2</sub>Cl<sub>2</sub> (1.5 mL) was added dropwise using a syringe. The reaction mixture was stirred for 36 h at room temperature and then was quenched with H<sub>2</sub>O (5.0 mL). Phases were separated, the aqueous phase was extracted with CH<sub>2</sub>Cl<sub>2</sub> (3 × 5 mL), the combined organic phases were washed with brine (10 mL) and dried over MgSO<sub>4</sub>. After removal of the volatiles in vacuo (20–23 °C, 20 mmHg), the crude product was recrystallized from pentane/CH<sub>2</sub>Cl<sub>2</sub> affording **2d** (247 mg, 52%) as pale red crystals. Compound **2d** has been previously synthesized.<sup>22</sup>

Data for **2d**:

mp: 212–214 °C (pentane/CH<sub>2</sub>Cl<sub>2</sub>)

<sup>1</sup>H NMR: (500 MHz, CDCl<sub>3</sub>)

δ 8.15 (d, *J* = 8.8 Hz, 2H, HC(9)), 8.00 (dd, *J* = 5.5, 3.1 Hz, 2H, HC(4)), 7.87 (dd, *J* = 5.6, 3.1 Hz, 2H, HC(5)), 7.39 (d, *J* = 8.8 Hz, 2H, HC(8))

<sup>13</sup>C NMR: (125 MHz, CDCl<sub>3</sub>)

δ 167.0 (C(2)), 146.9 (C(aryl)), 144.6 (C(aryl)), 135.3 (C(5)), 131.7 (C(3)), 125.8 (C(aryl)), 124.5 (C(aryl)), 124.4 (C(aryl))

IR: (neat)

1788 (m), 1744 (s), 1716 (s), 1600 (m), 1580 (m), 1516 (m), 1469 (m), 1341 (s), 1318 (w), 1288 (m), 1273 (s), 1263 (s), 1171 (m), 1118 (w), 1087 (m), 1034 (s), 949

(w), 866 (m), 855 (m), 843 (m), 816 (w), 789 (m), 738 (s), 709 (s), 694 (m)

MS (ESI)

637 (11), 620 (11), 486 (18), 355 (33), 333 (48), 301 (13, M+H), 163 (100)

HRMS: calcd for  $C_{14}H_9N_2O_4S^+$ : 301.0283, found: 301.0281

TLC:  $R_f$  0.25 (hexane/EtOAc, 3:1) [ $KMnO_4$ ]

### Preparation of 2-(2-Methylphenylthio)isoindoline-1,3-dione (**2e**)

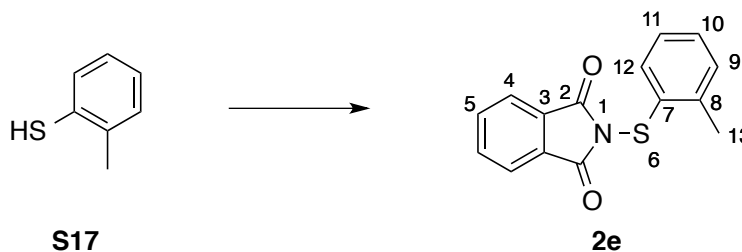

Following General Procedure 1, a suspension of phthalimide (1.07 g, 7.27 mmol) and 2-methylthiophenol (**S17**) (1.00 g, 8.05 mmol, 1.11 equiv) in MeCN (4.0 mL) and pyridine (5.0 mL) was treated with a solution of  $Br_2$  (0.45 mL, 8.8 mmol, 1.2 equiv) in MeCN (3.0 mL). Upon complete addition of the  $Br_2$  solution, the mixture was stirred for 1 h at 0 °C and was subsequently quenched by dropwise addition of  $H_2O$  (15 mL). Filtration of the suspension and washing of the precipitate with pre-cooled MeOH (0 °C, 4 × 6 mL) afforded 1.72 g of crude product. Recrystallization from EtOH/ $CH_2Cl_2$  afforded **2e** (1.54 g, 71%) as yellow needles. The analytical data match those published in the literature.<sup>23</sup>

#### Data for 2e:

mp: 169–171 °C (EtOH/ $CH_2Cl_2$ )

$^1H$  NMR: (400 MHz,  $CDCl_3$ )

$\delta$  7.93 (dd,  $J = 5.5, 3.1$  Hz, 1H, HC(4)), 7.78 (dd,  $J = 5.5, 3.1$  Hz, 1H, HC(5)), 7.40 (d,  $J = 7.7$  Hz, 1H, HC(aryl)), 7.23–7.16 (m, 2H, HC(aryl)), 7.15–7.08 (m, 1H, HC(aryl)), 2.62 (s, 3H, HC(13))

$^{13}C$  NMR: (125 MHz,  $CDCl_3$ )

$\delta$  167.7 (C(2)), 138.2 (C(8)), 134.6 (C(4)), 134.1 (C(7)), 132.0 (C(3)), 130.6 (C(aryl)), 130.4 (C(aryl)), 128.9 (C(aryl)), 126.8 (C(aryl)), 124.0 (C(5)), 20.1 (C(13))

IR: (neat)

1785 (m), 1738 (s), 1712 (s), 1607 (w), 1367 (w), 1464 (m), 1367 (w), 1344 (m),

1280 (s), 1171 (w), 1041 (s), 933 (w), 864 (m), 793 (m), 738 (s), 714 (s), 686 (m), 678 (m)

MS: (ES<sup>+</sup>, 70 eV)

269 (99, M<sup>+</sup>), 252 (14), 236 (49), 122 (100)

HRMS: calcd for C<sub>15</sub>H<sub>12</sub>NO<sub>2</sub>S<sup>+</sup>: 270.0589, found: 270.0589

TLC: R<sub>f</sub> 0.32 (hexane/EtOAc, 5:1) [CAM]

### Preparation of 2-((2,6-Dimethylphenyl)thio)isoindoline-1,3-dione (**2f**)

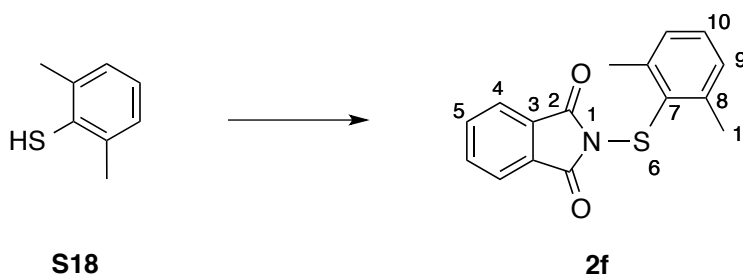

Following General Procedure 1, a suspension of phthalimide (1.47 g, 10.0 mmol) and 2,6-dimethylthiophenol (**S18**) (1.45 g, 10.5 mmol, 1.05 equiv) in MeCN (3.8 mL) and pyridine (7.7 mL) was treated with a solution of Br<sub>2</sub> (0.56 mL, 11 mmol, 1.1 equiv) in MeCN (5.0 mL). Upon complete addition of the Br<sub>2</sub> solution, the mixture was stirred for 3 h at 0 °C and was subsequently quenched by dropwise addition of H<sub>2</sub>O (15.0 mL). Filtration of the suspension and washing of the precipitate with pre-cooled MeOH (0 °C, 4 × 5 mL) afforded 2.63 g of crude product. Recrystallization from a hot MeOH/CH<sub>2</sub>Cl<sub>2</sub> mixture (3:1, 107 mL) afforded **2f** (2.28 g, 80%) as pale yellow crystals. An analytically pure sample was obtained by sublimation (145°–150 °C, 0.3 mmHg).

#### Data for 2f:

mp: 164–165 °C (MeOH/CH<sub>2</sub>Cl<sub>2</sub>)

<sup>1</sup>H NMR: (500 MHz, CDCl<sub>3</sub>)

δ 7.83 (dd, *J* = 5.5, 3.1 Hz, 2H, HC(4)), 7.72 (dd, *J* = 5.5, 3.1 Hz, 2H, HC(5)), 7.19 (t, *J* = 7.5 Hz, 1H, HC(10)), 7.10 (d, *J* = 7.5 Hz, 2H, HC(9)), 2.74 (s, 6H, HC(11))

<sup>13</sup>C NMR: (125 MHz, CDCl<sub>3</sub>)

δ 167.8 (C(2)), 144.1 (C(8)), 134.4 (C(5)), 132.0 (C(3)), 131.7 (C(7)), 130.7 (C(10)), 128.5 (C(9)), 123.6 (C(4)), 22.2 (C(11))

IR: (neat)

1782 (w), 1729 (s), 1704 (m), 1604 (w), 1466 (m), 1433 (w), 1362 (w), 1343 (m), 1279 (s), 1264 (m), 1147 (m), 1109 (w), 1055 (s), 895 (w), 867 (m), 798 (m), 783 (m), 722 (m)

MS: (ES<sup>+</sup>, 70 eV)

283 (55, M<sup>+</sup>), 250 (57), 207 (6), 136 (100), 121 (8), 91 (16), 77 (10)

HRMS: calcd for C<sub>16</sub>H<sub>14</sub>NO<sub>2</sub>S<sup>+</sup>: 284.0745, found: 284.0746

TLC: R<sub>f</sub> 0.39 (hexanes/EtOAc, 5:1) [KMnO<sub>4</sub>]

Analysis: C<sub>16</sub>H<sub>13</sub>NO<sub>2</sub>S (283.34)

Calcd: C, 67.82; H, 4.62; N, 4.94

Found: C, 67.56; H, 4.40; N, 4.97

### Preparation of 2-((2-Ethylphenyl)thio)isoindoline-1,3-dione (**2g**)

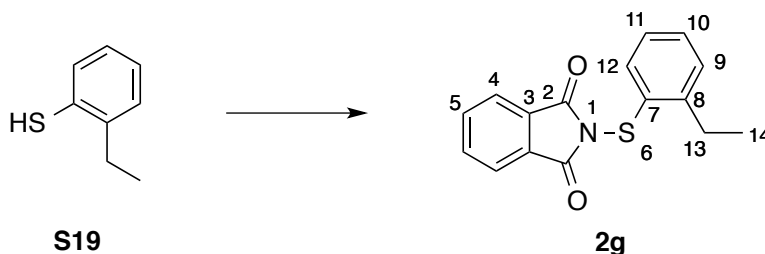

Following General Procedure 1, a suspension of phthalimide (500 mg, 3.40 mmol) and 2-ethylthiophenol (**S19**) (493 mg, 3.57 mmol, 1.05 equiv) in MeCN (2.0 mL) and pyridine (2.5 mL) was treated with a solution of Br<sub>2</sub> (0.21 mL, 4.1 mmol, 1.2 equiv) in MeCN (1.5 mL). Upon complete addition of the Br<sub>2</sub> solution, the mixture was stirred for 1 h at 0 °C and was subsequently quenched by dropwise addition of H<sub>2</sub>O (8.0 mL). Filtration of the suspension and washing of the precipitate with pre-cooled MeOH (0 °C, 4 × 3 mL) afforded pure **2g** (560 mg, 58%) as a pale yellow solid. Further purification was achieved by recrystallization from a hexane/CH<sub>2</sub>Cl<sub>2</sub> mixture.

Data for **2g**:

mp: 117–119 °C (hexane/CH<sub>2</sub>Cl<sub>2</sub>)

<sup>1</sup>H NMR: (500 MHz, CDCl<sub>3</sub>)

δ 7.93 (dd, *J* = 5.5, 3.1 Hz, 2H, HC(4)), 7.78 (dd, *J* = 5.5, 3.1 Hz, 2H, HC(5)), 7.43 (d, *J* = 7.8 Hz, 1H, HC(aryl)), 7.25–7.21 (m, 2H, HC(aryl)), 7.15–7.08 (m, 1H, HC(aryl)), 3.06 (q, *J* = 7.5 Hz, 2H, HC(13)), 1.31 (t, *J* = 7.5 Hz, 3H, HC(14))

$^{13}\text{C}$  NMR: (125 MHz,  $\text{CDCl}_3$ )

$\delta$  167.8 (C(2)), 144.3 (C(8)), 134.6 (C(5)), 133.8 (C(7)), 132.0 (C(3)), 130.8 (C(aryl)), 129.1 (C(aryl)), 128.9 (C(aryl)), 126.8 (C(aryl)), 124.0 (C(4)), 26.7 (C(13)), 15.5 (C(14))

IR: (neat)

2883 (w), 1784 (m), 1741 (s), 1715 (s), 1589 (w), 1467 (m), 1444 (m), 1425 (w), 1354 (m), 1338 (m), 1275 (s), 1171 (w), 1060 (w), 1038 (s), 941 (w), 865 (m), 793 (m), 744 (s), 709 (s), 695 (m), 681 (m)

MS: ( $\text{ES}^+$ , 70 eV)

283 (26,  $\text{M}^+$ ), 250 (13), 207 (6), 136 (100)

HRMS: calcd for  $\text{C}_{16}\text{H}_{14}\text{NO}_2\text{S}^+$ : 284.0745, found: 284.0733

TLC:  $R_f$  0.33 (hexane/EtOAc, 5:1) [CAM]

### Preparation of 2-((2,6-Diethylphenyl)thio)isoindoline-1,3-dione (**2h**)

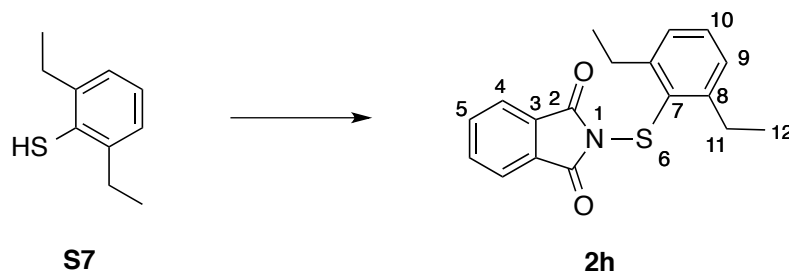

Following General Procedure 1, a suspension of phthalimide (1.47 g, 10.0 mmol) and 2,6-diethylbenzenethiol (**S7**) (1.75 g, 10.5 mmol, 1.05 equiv) in MeCN (3.8 mL) and pyridine (7.7 mL) was treated with a solution of  $\text{Br}_2$  (0.56 mL, 11 mmol, 1.1 equiv) in MeCN (5.0 mL). Upon complete addition of the  $\text{Br}_2$  solution, the mixture was stirred for 1 h at 0 °C and 2.5 h at room temperature. Subsequently, the mixture was cooled to 0 °C and quenched by dropwise addition of  $\text{H}_2\text{O}$  (15.0 mL). Filtration of the suspension and washing of the precipitate with pre-cooled MeOH (0 °C,  $4 \times 7$  mL) afforded 2.33 g of crude product. Recrystallization from a hot MeOH/ $\text{CH}_2\text{Cl}_2$  mixture (9:1, 65 mL) afforded **2h** (2.10 g, 67%) as off-white crystals. An analytically pure sample was obtained by sublimation (100°–105 °C, 0.3 mmHg).

Data for **2h**:

mp: 109–110 °C (MeOH/ $\text{CH}_2\text{Cl}_2$ )

$^1\text{H}$  NMR: (500 MHz,  $\text{CDCl}_3$ )

$\delta$  7.83 (dd,  $J = 5.5, 3.1$  Hz, 2H, HC(4)), 7.72 (dd,  $J = 5.5, 3.1$  Hz, 2H, HC(5)), 7.30 (t,  $J = 7.3$  Hz, 1H, HC(10)), 7.15 (d,  $J = 7.6$  Hz, 2H, HC(9)), 3.28 (q,  $J = 7.5$  Hz, 4H, HC(11)), 1.22 (t,  $J = 7.5$  Hz, 6H, HC(12))

$^{13}\text{C}$  NMR: (500 MHz,  $\text{CDCl}_3$ )

$\delta$  167.8 (C(2)), 150.1 (C(8)), 134.4 (C(5)), 132.1 (C(3)), 131.2 (C(10)), 130.8 (C(7))  
126.9 (C(9)) 123.6 (C(4)) 28.1 (C(11)), 16.4 (C(12))

IR: (neat)

2971 (w), 1779 (w), 1729 (s), 1704 (m), 1607 (w), 1463 (m), 1431 (m), 1361 (w),  
1343 (m), 1274 (s), 1262 (m), 1164 (m), 1050 (s), 864 (m), 807 (m), 758 (m)

MS: ( $\text{ES}^+$ , 70 eV)

311 (10,  $\text{M}^+$ ), 274 (15), 207 (10), 164 (100), 149 (42), 135 (92), 115 (11), 104 (10),  
91 (12), 76 (11)

HRMS: calcd for  $\text{C}_{18}\text{H}_{18}\text{NO}_2\text{S}^+$ : 312.1058, found: 312.1055

TLC:  $R_f$  0.44 (hexanes/EtOAc, 5:1) [ $\text{KMnO}_4$ ]

Analysis:  $\text{C}_{18}\text{H}_{17}\text{NO}_2\text{S}$  (311.40)

Calcd: C, 69.43; H, 5.50; N, 4.50

Found: C, 69.42; H, 5.30; N, 4.87

### Preparation of 2-((2-Isopropylphenyl)thio)isoindoline-1,3-dione (**4i**)

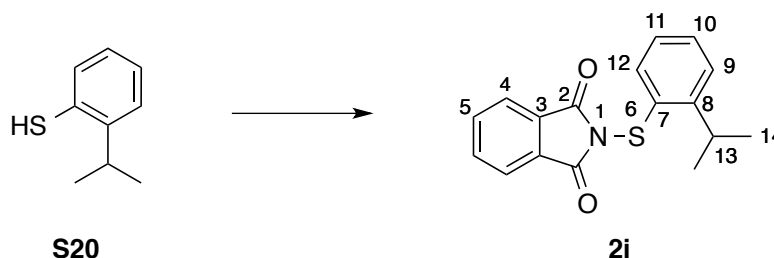

Following General Procedure 1, a suspension of phthalimide (704 mg, 4.78 mmol) and 2-isopropylthiophenol (**S20**) (761 mg, 5.00 mmol, 1.05 equiv) in MeCN (2.5 mL) and pyridine (3.1 mL) was reacted with a solution of  $\text{Br}_2$  (0.29 mL, 5.7 mmol, 1.2 equiv) in MeCN (1.8 mL). Upon complete addition of the  $\text{Br}_2$  solution, the mixture was stirred for 2.5 h at 0 °C and was subsequently quenched by dropwise addition of  $\text{H}_2\text{O}$  (10 mL). Filtration of the suspension and washing of the precipitate with pre-cooled MeOH (0 °C, 4 × 6 mL) afforded pure **2i** (1.19 g,



84%) as a pale yellow solid. Further purification was achieved by recrystallization from a hexane/CH<sub>2</sub>Cl<sub>2</sub> mixture.

Data for 2i:

mp: 149–151 °C (hexane/CH<sub>2</sub>Cl<sub>2</sub>)

<sup>1</sup>H NMR: (500 MHz, CDCl<sub>3</sub>)

δ 7.92 (dd, *J* = 5.5, 3.1 Hz, 2H, HC(4)), 7.77 (dd, *J* = 5.6, 3.1 Hz, 2H, HC(5)), 7.43 (d, *J* = 7.9 Hz, 1H, HC(aryl)), 7.34–7.22 (m, 2H, HC(aryl)), 7.13–7.07 (m, 1H, HC(aryl)), 3.90 (hept, *J* = 6.8 Hz, 1H, HC(13)), 1.30 (d, *J* = 6.8 Hz, 6H, HC(14))

<sup>13</sup>C NMR: (125 MHz, CDCl<sub>3</sub>)

δ 167.8 (C(2)), 148.9 (C(8)), 134.6 (C(5)), 133.3 (C(7)), 132.0 (C(3)), 130.9 (C(aryl)), 129.3 (C(aryl)), 126.7 (C(aryl)), 126.0 (C(aryl)), 124.0 (C(4)), 30.4 (C(13)), 23.8 (C(14))

IR: (neat)

2957 (m), 1784 (m), 1738 (s), 1710 (s), 1606 (w), 1468 (m), 1433 (m), 1386 (w), 1368 (m), 1356 (m), 1337 (m), 1277 (s), 1265 (s), 1171 (w), 1041 (s), 866 (m), 794 (w), 761 (s) 751 (m), 734 (w), 710 (s), 695 (m), 688 (m)

MS: (ES<sup>+</sup>, 70 eV)

297 (17, M<sup>+</sup>), 207 (6), 149 (100), 78 (135), 104 (8), 91 (20)

HRMS: calcd for C<sub>17</sub>H<sub>16</sub>NO<sub>2</sub>S<sup>+</sup>: 298.0902, found: 298.0892

TLC: *R*<sub>f</sub> 0.35 (hexane/EtOAc, 5:1) [CAM]

**Preparation of 2-((2,6-Diisopropylphenyl)thio)isoindoline-1,3-dione (2j)**

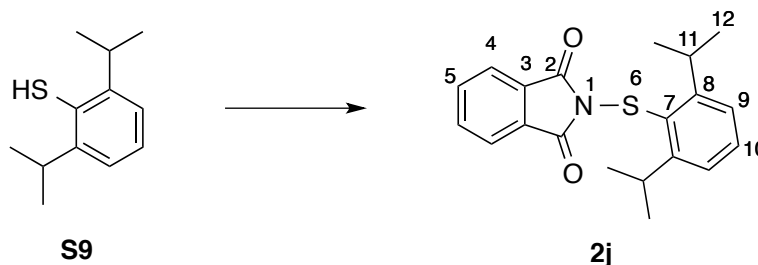

Following General Procedure 1, a suspension of phthalimide (4.33 g, 29.4 mmol) and 2,6-diisopropylthiophenol (**S9**) (6.00 g, 30.9 mmol, 1.05 equiv) in MeCN (3.8 mL) and pyridine (7.7 mL) was treated with a solution of Br<sub>2</sub> (1.66 mL, 32.3 mmol, 1.10 equiv) in MeCN (5.0 mL). Upon complete addition of the Br<sub>2</sub> solution, the mixture was stirred for 2.5 h at 0 °C and 1.5 h at

room temperature. Subsequently, the mixture was cooled to 0 °C and quenched by dropwise addition of H<sub>2</sub>O (40 mL). Filtration of the suspension and washing of the precipitate with pre-cooled MeOH (0 °C, 4 × 15 mL) afforded 7.40 g of crude product. Recrystallization from a hot MeOH/CH<sub>2</sub>Cl<sub>2</sub> mixture (9:1, 230 mL) afforded **2j** (5.74 g). A second crop (0.46 g) was collected from the mother liquor giving a combined yield of 6.20 g (62%) of **2j** as off-white crystals. An analytically pure sample was obtained by sublimation (145°–150 °C, 0.3 mmHg).

Data for **2j**:

mp: 161–162 °C (MeOH/CH<sub>2</sub>Cl<sub>2</sub>)

<sup>1</sup>H NMR: (500 MHz, CDCl<sub>3</sub>)

δ 7.83 (dd, *J* = 5.5, 3.1 Hz, 2H, HC(4)), 7.71 (dd, *J* = 5.5, 3.1 Hz, 2H, HC(5)), 7.39 (t, *J* = 7.7 Hz, 1H, HC(10)), 7.21 (d, *J* = 7.7 Hz, 2H, HC(9)), 4.51 (hept, *J* = 6.8 Hz, 2H, HC(11)), 1.22 (d, *J* = 6.8 Hz, 12H, HC(12))

<sup>13</sup>C NMR: (125 MHz, CDCl<sub>3</sub>)

δ 167.7 (C(2)), 154.5 (C(8)), 134.4 (C(5)), 132.0 (C(3)), 131.6 (C(10)), 129.9 (C(7))  
124.0 (C(4)) 123.6 (C(9)) 31.3 (C(11)) 24.6 (C(12))

IR: (neat)

2964 (m), 2866 (m), 1781 (m), 1728 (s), 1703 (s), 1609 (w), 1575 (w), 1465 (m), 1382 (m), 1361 (m), 1340 (m), 1276 (s), 1165 (m), 1102 (w), 1046 (s), 866 (m), 802 (m), 786 (m), 752 (m), 742 (m)

MS: (ES<sup>+</sup>, 70 eV)

339 (5, M<sup>+</sup>), 192 (60), 177 (15), 161 (4), 149 (100), 135 (121), 115 (6), 91 (6)

HRMS: calcd for C<sub>20</sub>H<sub>22</sub>NO<sub>2</sub>S<sup>+</sup>: 340.1371, found: 340.1371

TLC: *R<sub>f</sub>* 0.47 (hexanes/EtOAc, 5:1) [KMnO<sub>4</sub>]

Analysis: C<sub>20</sub>H<sub>21</sub>NO<sub>2</sub>S (339.45)

Calcd: C, 70.77; H, 6.24; N, 4.13

Found: C, 70.68; H, 6.19; N, 4.45

**Preparation of 2-((2,6-Diisopropoxyphenyl)thio)isoindoline-1,3-dione (2k)**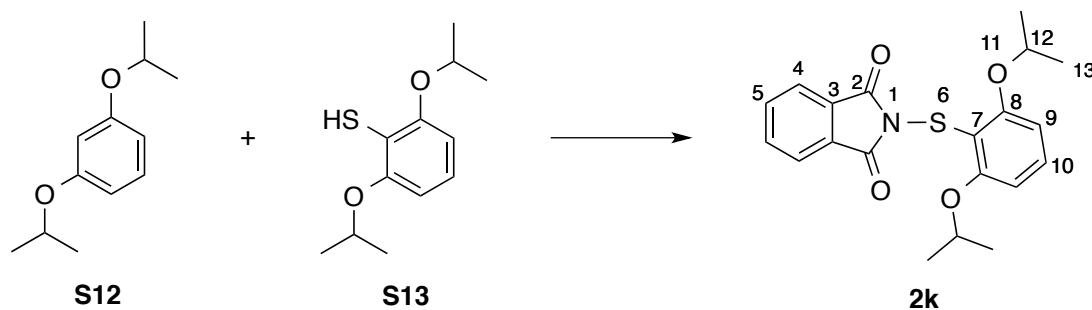

Following General Procedure 1, 950 mg of a 30:70 mixture of **S12** (calcd: 270 mg) and **S13** (calcd: 680 mg, 3.01 mmol, 1.10 equiv) and phthalimide (405 mg, 2.75 mmol) were suspended in MeCN (1.5 mL) and pyridine (1.9 mL). Upon complete addition of a solution of Br<sub>2</sub> (0.16 mL, 3.1 mmol, 1.1 equiv) in MeCN (1.1 mL), the mixture was stirred at 0 °C for 1.5 h followed by the addition of another solution of Br<sub>2</sub> (73 μL, 1.4 mmol, 0.52 equiv) in MeCN (0.5 mL). The reaction mixture was stirred for another 1 h at 0 °C and quenched with H<sub>2</sub>O (7.0 mL). In contrast to the other sulfenylating agents, compound **2k** did not precipitate, and a turbid solution was obtained instead. After addition of EtOAc (10 mL) and brine (15 mL), phase separation occurred and the phases were separated. The aqueous phase was extracted with EtOAc (3 × 10 mL), dried over MgSO<sub>4</sub> and concentrated in vacuo (20–23 °C, 20 mmHg). Column chromatography (SiO<sub>2</sub>, 35 g, 35 mm Ø, hexane/EtOAc, 10:1→5:1) afforded 653 mg of **2k** along with small impurities. Recrystallization from hexane/CH<sub>2</sub>Cl<sub>2</sub> (3:1, 2.4 mL) provided pure **2k** (300 mg, 29% based on the amount of phthalimide) as yellow crystals.

Data for **2k**:

mp: 131–133 °C (hexane/CH<sub>2</sub>Cl<sub>2</sub>)

<sup>1</sup>H NMR: (500 MHz, CDCl<sub>3</sub>)

δ 7.86 (dd, *J* = 5.5, 3.1 Hz, 2H, HC(4)), 7.72 (dd, *J* = 5.4, 3.1 Hz, 2H, HC(5)), 7.11 (t, *J* = 8.4 Hz, 1H, HC(10)), 6.46 (d, *J* = 8.4 Hz, 2H, HC(9)), 4.56 (hept, *J* = 6.1 Hz, 2H, HC(12)), 1.23 (d, *J* = 6.1 Hz, 12H, HC(13))

<sup>13</sup>C NMR: (125 MHz, CDCl<sub>3</sub>)

δ 167.7 (C(2)), 157.6 (C(8)), 134.1 (C(5)), 132.6 (C(3)), 129.6 (C(10)), 123.4 (C(4)), 112.2 (C(7)), 106.3 (C(9)), 71.2 (C(12)), 21.9 (C(13))

IR: (neat)

2978 (m), 1783 (m), 1740 (a), 1715 (a), 1584 (m), 1461 (m), 1374 (m), 1344 (m), 1286 (s), 1250 (s), 1172 (w), 1139 (w), 1108 (s), 1047 (s), 900 (m), 867 (m), 798

(m), 763 (m), 718 (s), 695 (m)

MS: (ESI)

781 (7), 760 (56), 410 (10), 389 (100), 372 (66, M+H), 225 (50), 183 (53)

HRMS: calcd for C<sub>18</sub>H<sub>12</sub>NO<sub>4</sub>S<sup>+</sup>: 372.1270, found: 372.1262TLC: R<sub>f</sub> 0.27 (hexane/EtOAc, 4:1) [CAM]**Preparation of 2-((3,5-Diisopropylphenyl)thio)isoindoline-1,3-dione (21)**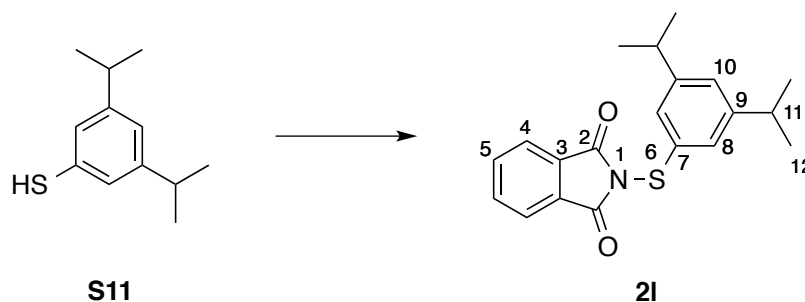

Following General Procedure 1, a suspension of phthalimide (406 mg, 2.76 mmol) and 3,5-diisopropylthiophenol (**S11**) (590 mg, 3.04 mmol, 1.10 equiv) in MeCN (1.5 mL) and pyridine (1.9 mL) was treated with a solution of Br<sub>2</sub> (0.16 mL, 3.1 mmol, 1.1 equiv) in MeCN (1.1 mL). Upon complete addition of the Br<sub>2</sub> solution, the mixture was stirred for 2 h at 0 °C and 1 h at room temperature. Subsequently, the reaction mixture was cooled to 0 °C and quenched by dropwise addition of H<sub>2</sub>O (5.0 mL). Filtration of the suspension and washing of the precipitate with pre-cooled (0 °C) MeOH (4 × 3 mL) afforded pure **21** (616 mg, 60%) as a pale yellow solid. Further purification was achieved by recrystallization from a hexane/CH<sub>2</sub>Cl<sub>2</sub> mixture.

Data for 21:mp: 116–118 °C (hexane/CH<sub>2</sub>Cl<sub>2</sub>)<sup>1</sup>H NMR: (500 MHz, CDCl<sub>3</sub>)

δ 7.93 (dd, *J* = 5.5, 3.1 Hz, 2H, HC(4)), 7.55 (dd, *J* = 5.5, 3.0 Hz, 2H, HC(5)), 7.34 (d, *J* = 1.7 Hz, 2H, HC(8)), 7.04 (t, *J* = 1.8 Hz, 1H, HC(10)), 2.85 (hept, *J* = 6.8 Hz, 2H, HC(11)), 1.20 (d, *J* = 6.9 Hz, 12H, HC(12))

<sup>13</sup>C NMR: (125 MHz, CDCl<sub>3</sub>)

δ 167.9 (C(2)), 150.2 (C(9)), 134.6 (C(5)), 134.2 (C(7)), 132.0 (C(3)), 127.5 (C(8)), 126.3 (C(10)), 124.0 (C(4)), 34.0 (C(11)), 23.9 (C(12))

IR: (neat)

2958 (m), 1781 (m), 1740 (s), 1710 (s), 1594 (m), 1464 (m), 1433 (m), 1364 (m),

1347 (m), 1278 (s), 1170 (w), 1065 (m), 1045 (s), 877 (m), 865 (m), 719 (s), 701 (m), 686 (m)

MS: (ESI)

698 (40), 637 (12), 544 (18), 528 (33), 394 (13), 372 (36), 357 (100), 340 (92, M+H), 298 (20), 219 (13), 210 (10), 163 (16)

HRMS: calcd for  $C_{20}H_{22}NO_2S^+$ : 340.1371, found: 340.1369

TLC:  $R_f$  0.40 (hexane/EtOAc, 5:1) [CAM]

### Preparation of 2-(1-Naphthalenylthio)isoindoline-1,3-dione (**2m**)

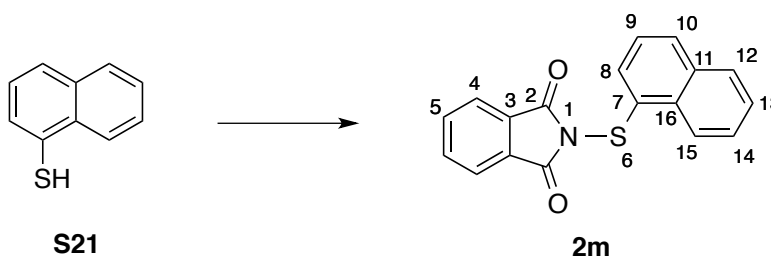

Following General Procedure 1, a suspension of phthalimide (874 mg, 5.94 mmol) and 1-naphthalenethiol (**S21**)<sup>13</sup> (1.00 g, 6.24 mmol, 1.05 equiv) in MeCN (4.0 mL) and pyridine (5.0 mL) was treated with a solution of Br<sub>2</sub> (0.35 mL, 6.8 mmol, 1.1 equiv) in MeCN (3.0 mL). Upon complete addition of the Br<sub>2</sub> solution, the mixture was stirred for 1 h at 0 °C and was subsequently quenched by dropwise addition of H<sub>2</sub>O (25 mL). Filtration of the suspension and washing of the precipitate with pre-cooled MeOH (0 °C, 4 × 6 mL) yielded 1.55 g of crude product. Recrystallization from pentane/CH<sub>2</sub>Cl<sub>2</sub> afforded **2m** (1.05 g, 55%) as orange plates.

#### Data for 2m:

mp: 176–178 °C (pentane/CH<sub>2</sub>Cl<sub>2</sub>)

<sup>1</sup>H NMR: (500 MHz, CDCl<sub>3</sub>)

δ 8.97 (d,  $J = 8.5$  Hz, 1H, HC(aryl)), 8.12 (d,  $J = 7.4$  Hz, 1H, HC(aryl)), 7.93–7.81 (m, 4H, HC(aryl)), 7.76–7.65 (m, 3H, HC(aryl)), 7.54 (t,  $J = 7.5$  Hz, 1H, HC(aryl)), 7.44 (t,  $J = 7.7$  Hz, 1H, HC(aryl))

<sup>13</sup>C NMR: (125 MHz, CDCl<sub>3</sub>)

δ 167.9 (C(2)), 134.54 (C(aryl)), 134.49 (C(aryl)), 134.0 (C(aryl)), 133.1 (C(aryl)), 132.0 (C(aryl)), 131.4 (C(aryl)), 131.1 (C(aryl)), 128.3 (C(aryl)), 127.4 (C(aryl)), 126.6 (C(aryl)), 125.8 (C(aryl)), 125.5 (C(aryl)), 123.9 (C(aryl))

IR: neat

3060 (w), 1780 (m), 1731 (s), 1703 (m), 1586 (w), 1500 (w), 1466 (m), 1360 (m), 1343 (m), 1275 (s), 1264 (m), 1222 (w), 1198 (w), 1165 (m), 1052 (s), 1018 (w), 963 (w), 865 (s), 824 (w), 799 (m), 774 (s), 740 (m), 710 (s)

MS: (ESI)

630 (21), 477 (27), 323 (67), 306 (100, M+H), 163 (7), 159 (30)

HRMS: calcd for C<sub>18</sub>H<sub>12</sub>NO<sub>2</sub>S<sup>+</sup>: 306.0589, found: 306.0579

TLC: R<sub>f</sub> 0.38 (hexane/EtOAc, 3:1) [CAM]

### Preparation of 2-(2-Naphthalenylthio)isoindoline-1,3-dione (**2n**)

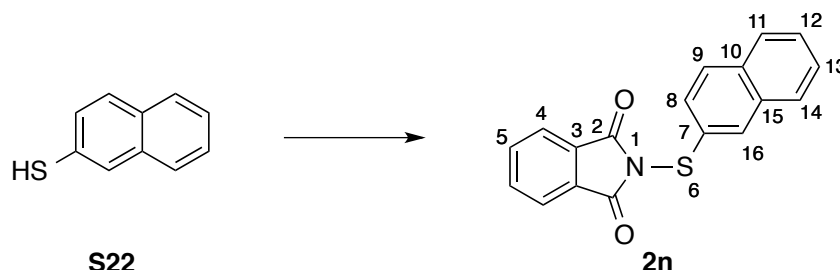

Following General Procedure 1, a suspension of phthalimide (874 mg, 5.94 mmol) and 2-naphthalenethiol (**S22**)<sup>13</sup> (1.00 g, 6.24 mmol, 1.05 equiv) in MeCN (4.0 mL) and pyridine (5.0 mL) was treated with a solution of Br<sub>2</sub> (0.35 mL, 6.8 mmol, 1.1 equiv) in MeCN (3.0 mL). Upon complete addition of the Br<sub>2</sub> solution, the mixture was stirred for 1 h at 0 °C and was subsequently quenched by dropwise addition of H<sub>2</sub>O (25 mL). Filtration of the suspension and washing of the precipitate with pre-cooled MeOH (0 °C, 4 × 6 mL) yielded the crude product that was purified by column chromatography (SiO<sub>2</sub>, 110 g, 60 mm Ø, hexane/ EtOAc/CH<sub>2</sub>Cl<sub>2</sub>, 5:1:1). Recrystallization from pentane/CH<sub>2</sub>Cl<sub>2</sub> afforded **2n** (350 mg, 18%) as pale yellow crystals.

Data for 2n:

mp: 208–210 °C (pentane/CH<sub>2</sub>Cl<sub>2</sub>)

<sup>1</sup>H NMR: (400 MHz, CDCl<sub>3</sub>,)

δ 8.15 (s, 1H, HC(16)), 7.93 (dd, *J* = 5.5, 3.1 Hz, 2H, H(C(4))), 7.87–7.73 (m, 5H, HC(aryl)), 7.66 (dd, *J* = 8.6, 1.9 Hz, 1H, HC(aryl)), 7.49 (dd, *J* = 6.3, 3.2 Hz, 2H, HC(aryl))

<sup>13</sup>C NMR: (125 MHz, CDCl<sub>3</sub>)

δ 167.8 (C(2)), 134.7 (C(5)), 133.3 (C(aryl)), 133.2 (C(aryl)), 132.1 (C(aryl)), 132.0

(C(aryl)), 131.1 (C(aryl)), 129.2 (C(aryl)), 128.1 (C(aryl)), 127.9 (C(aryl)), 127.7 (C(aryl)), 127.2 (C(aryl)), 126.84 (C(aryl)), 124.1 (C(4))

IR: (neat)

3060 (w), 1779 (m), 1730 (s), 1703 (m), 1582 (w), 1496 (w), 1361 (m), 1342 (m), 1276 (s), 1263 (m), 1169 (w), 1149 (w), 1128 (w), 1071 (w), 1054 (s), 1009 (w), 952 (w), 897 (w), 864 (s), 822 (m), 795 (w), 765 (w), 749 (m), 711 (s)

MS: (ESI)

637 (36), 477 (26), 306 (100, M+H), 159 (9)

HRMS: calcd for  $C_{18}H_{12}NO_2S^+$ : 306.0589, found: 306.0586

TLC:  $R_f$  0.37 (hexane/EtOAc, 3:1) [CAM]

## Thioetherifications (Table 1)

### General Procedure 2: Sulfenylating Agent Survey

An oven-dried, 5-mm NMR tube was charged with (*R*)-**3c** (3.6 mg, 7.0  $\mu$ mol, 0.10 equiv) and the corresponding sulfenylating agent (74.0  $\mu$ mol, 1.05 equiv). In a 6 dram vial, (*E*)-5-phenyl-4-penten-1-ol (**1b**) (11.3 mg, 70.0  $\mu$ mol) was dissolved in  $CDCl_3$  (0.40 mL) and was transferred to the NMR tube washing with  $CDCl_3$  (0.25 mL). The NMR tube was capped with a septum, shaken well, and placed into a dry-ice/acetone bath ( $-78\text{ }^\circ\text{C}$ ) for 2 min. Methanesulfonic acid (4.5  $\mu$ L, 70  $\mu$ mol, 1.0 equiv) was added via syringe, the NMR tube was removed from the dry-ice/acetone bath and shaken again until the was homogeneous. The NMR tube was put in a freezer ( $-20\text{ }^\circ\text{C}$ ) for the indicated time. Conversion to the corresponding product was observed by the appearance of a diagnostic  $^1\text{H}$  NMR resonance for the product around 4.20 ppm (doublet) with respect to the alkene peaks of the substrate at 6.23 and 6.43 ppm. Besides the formation of small quantities of the *exo*-cyclization product (< 5%), no other products were observed in the  $^1\text{H}$  NMR spectra. Formation of phthalimide byproduct was visually confirmed by the precipitation out of the solution. After the indicated time the reaction was quenched with  $\text{Et}_3\text{N}$  (0.10 mL) and the crude mixture was purified by silica gel column chromatography.

## Sulfonylating Agent Survey

Table 1 Entry 1: (2*R*,3*S*)-2-Phenyl-3-(phenylthio)tetrahydro-2*H*-pyran (**4ba**)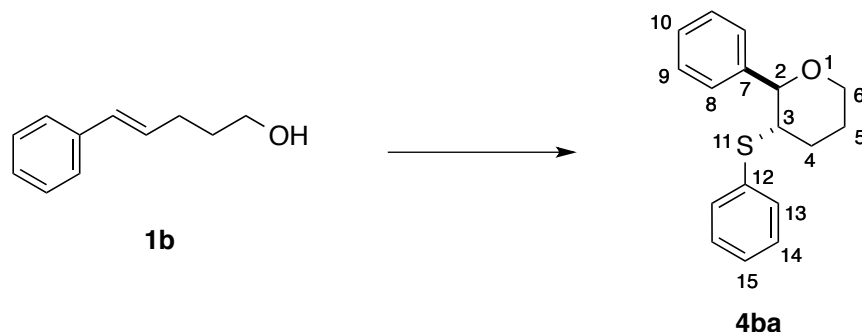

Following General Procedure 2, an oven-dried, 5-mm NMR tube was charged with (*R*)-**3c** (3.7 mg, 7.1  $\mu\text{mol}$ , 0.10 equiv) and sulfonylating agent **2a** (18.9 mg, 74.1  $\mu\text{mol}$ , 1.06 equiv). To this was added **1b** (11.3 mg, 69.7  $\mu\text{mol}$ ) in  $\text{CDCl}_3$  (0.65 mL) and the NMR tube was cooled in a dry-ice/acetone bath.  $\text{MsOH}$  (4.5  $\mu\text{L}$ , 70  $\mu\text{mol}$ , 1.0 equiv) was added via syringe and the reaction mixture was kept at  $-20\text{ }^\circ\text{C}$  for 24 h. At this point, the reaction proceeded to 93% conversion by  $^1\text{H}$  NMR analysis and was quenched with  $\text{Et}_3\text{N}$  (0.10 mL). Purification by column chromatography ( $\text{SiO}_2$ , 8.0 g, 10 mm  $\varnothing$ , hexane/ $\text{EtOAc}$ , 60:1) afforded 18 mg of **4ba** along with 10% Lewis base contaminant. The spectroscopic data match those published in the literature.<sup>16</sup>

Data for **4ba**:

$^1\text{H}$  NMR: (500 MHz,  $\text{CDCl}_3$ )

$\delta$  7.39–7.35 (m, 2H, HC(8)), 7.31–7.23 (m, 3H, HC(9), HC(10)), 7.16–7.09 (m, 5H, HC(aryl)), 4.20 (d,  $J = 10.1$  Hz, 1H, HC(2)), 4.12–4.06 (m, 1H, HC(6)), 3.57 (ddd,  $J = 12.9, 12.1, 2.1$  Hz, 1H, HC(6)), 3.24 (ddd,  $J = 11.5, 10.1, 4.0$  Hz, 1H, HC(3)), 2.33–2.26 (m, 1H, HC(4)), 1.92–1.80 (m, 1H, HC(5)), 1.76–1.63 (m, 2H, HC(4), HC(5)).

SFC: (2*R*,3*S*)-**4ba**,  $t_{\text{R}}$  7.06 min (95.3%); (2*S*,3*R*)-**4ba**,  $t_{\text{R}}$  9.78 min (4.7%) (Chiralpak AD, 5% MeOH in  $\text{CO}_2$ , 2.0 mL/min, 220 nm, 40  $^\circ\text{C}$ )



**Table 1 Entry 2: (2*R*,3*S*)-3-((4-Methoxyphenyl)thio)-2-phenyltetrahydro-2*H*-pyran (**4bb**)**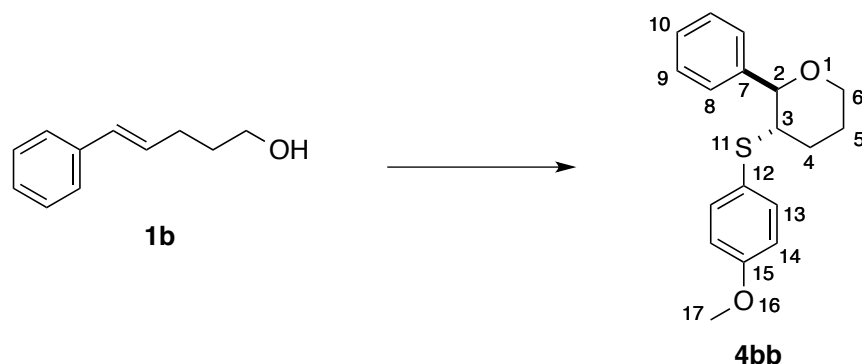

Following General Procedure 2, an oven-dried, 5-mm NMR tube was charged with (*R*)-**3c** (3.6 mg, 6.9  $\mu\text{mol}$ , 0.10 equiv) and sulfenylating agent **2b** (21.7 mg, 76.1  $\mu\text{mol}$ , 1.10 equiv). To this was added **1b** (11.2 mg, 69.0  $\mu\text{mol}$ ) in  $\text{CDCl}_3$  (0.65 mL) and the NMR tube was cooled in a dry-ice/acetone bath. MsOH (4.5  $\mu\text{L}$ , 70  $\mu\text{mol}$ , 1.0 equiv) was added via syringe and the reaction mixture was kept at  $-20\text{ }^\circ\text{C}$  for 21 h. At this point, the reaction proceeded to full conversion by  $^1\text{H}$  NMR analysis and was quenched with  $\text{Et}_3\text{N}$  (0.10 mL). Purification by column chromatography ( $\text{SiO}_2$ , 8.0 g, 10 mm  $\varnothing$ , hexane/EtOAc, 60:1) afforded 17 mg of **4bb**.

Data for **4bb**: $^1\text{H}$  NMR: (500 MHz,  $\text{CDCl}_3$ )

$\delta$  7.39–7.24 (m, 5H, HC(aryl)), 7.09–7.04 (m, 2H, HC(aryl)), 6.72–6.67 (m, 2H, HC(aryl)), 4.14 (d,  $J = 10.2$  Hz, 1H, HC(2)), 4.09–4.02 (m, 1H, HC(6)), 3.76 (s, 3H, HC(17)), 3.53 (ddd,  $J = 12.3, 11.4, 2.3$  Hz, 1H, HC(6)), 3.07 (ddd,  $J = 11.7, 10.2, 4.0$  Hz, 1H, HC(3)), 2.27–2.17 (m, 1H, HC(4)), 1.88–1.77 (m, 1H, HC(5)), 1.74–1.59 (m, 2H, HC(4), HC(5))

 $^{13}\text{C}$  NMR: (125 MHz,  $\text{CDCl}_3$ )

$\delta$  159.4 (C(15)), 140.1 (C(aryl)), 136.1 (C(aryl)), 128.18 (C(aryl)), 128.16 (C(aryl)) 127.8 (C(aryl)), 123.7 (C(aryl)), 114.1 (C(14)), 85.1 (C(2)), 68.5 (C(6)), 55.2 (C(17)), 51.2 (C(3)), 32.2 (C(4)), 27.1 (C(5))

MS: ( $\text{ES}^+$ , 70 eV)

300 (100,  $\text{M}^+$ ), 229 (27), 161 (46), 151 (16), 139 (20), 121 (8), 105 (23), 91 (32), 77 (10)

HRMS: calcd for  $\text{C}_{18}\text{H}_{21}\text{O}_2\text{S}^+$ : 301.1262, found: 301.1255TLC:  $R_f$  0.45 (hexane/EtOAc, 5:1) [CAM]

SFC: (2*R*,3*S*)-**4bb**,  $t_R$  9.22 min (95.1%); (2*S*,3*R*)-**4bb**,  $t_R$  12.62 min (4.9%) (Chiralpak AD, 5% MeOH in CO<sub>2</sub>, 2.0 mL/min, 220 nm, 40 °C)

**Table 1 Entry 3: (2*R*,3*S*)-2-Phenyl-3-((4-(trifluoromethyl)phenyl)thio)tetrahydro-2*H*-pyran (**4bc**)**

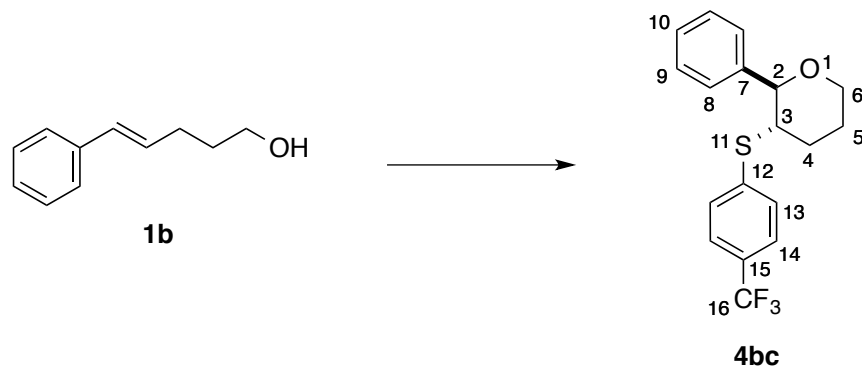

Following General Procedure 2, an oven-dried, 5-mm NMR tube was charged with (*R*)-**3c** (3.8 mg, 7.3  $\mu$ mol, 0.10 equiv) and sulfenylating agent **2c** (23.9 mg, 73.9  $\mu$ mol, 1.04 equiv). To this was added **1b** (11.5 mg, 70.9  $\mu$ mol) in CDCl<sub>3</sub> (0.65 mL) and the NMR tube was cooled in a dry-ice/acetone bath. MsOH (4.5  $\mu$ L, 70  $\mu$ mol, 0.99 equiv) was added via syringe and the reaction mixture was kept at  $-20$  °C for 24 h. At this point, the reaction proceeded to > 95% conversion by <sup>1</sup>H NMR analysis and was quenched with Et<sub>3</sub>N (0.10 mL). Purification by column chromatography (SiO<sub>2</sub>, 8.0 g, 10 mm  $\varnothing$ , hexane/EtOAc, 60:1) afforded 18 mg of **4bc** along with 1% Lewis base contaminant.

Data for **4bc**:

<sup>1</sup>H NMR: (500 MHz, CDCl<sub>3</sub>)

$\delta$  7.33–7.28 (m, 4H, HC(aryl)), 7.23–7.18 (m, 3H, HC(9), HC(10)), 7.09 (d,  $J$  = 8.1 Hz, 2H, HC(aryl)), 4.21 (d,  $J$  = 10.0 Hz, 1H, HC(2)), 4.14–4.09 (m, 1H, HC(6)), 3.60 (ddd,  $J$  = 12.2, 11.9, 2.1 Hz, 1H, HC(6)), 3.23 (ddd,  $J$  = 12.1, 10.1, 4.0 Hz, 1H, HC(3)), 2.39–2.30 (m, 1H, HC(4)), 1.97–1.84 (m, 1H, HC(5)), 1.82–1.68 (m, 2H, HC(4), HC(5))

<sup>13</sup>C NMR: (125 MHz, CDCl<sub>3</sub>)

$\delta$  139.60 (C(aryl)), 139.58 (C(aryl)), 131.1 C(aryl), 128.32 (q,  $J$  = 32.4 Hz, C(15)), 128.28 C(aryl), 128.2 C(aryl), 127.6 C(aryl), 125.2 (q,  $J$  = 3.7 Hz, C(14)), 124.0 (q,  $J$  = 272 Hz, C(16)), 85.4 (C(2)), 68.5 (C(6)), 50.6 (C(3)), 32.1 (C(4)), 27.0

(C(5))

MS: (ES<sup>+</sup>, 70 eV)338 (83, M<sup>+</sup>), 232 (10), 217 (27), 204 (100), 183 (13), 160 (38), 135 (63), 115 (8), 105 (18), 91 (30), 77 (13)HRMS: calcd for C<sub>18</sub>H<sub>18</sub>F<sub>3</sub>OS<sup>+</sup>: 339.1030, found: 339.1040TLC: R<sub>f</sub> 0.53 (hexane/EtOAc, 4:1) [CAM]SFC: (2*R*,3*S*)-**4bc**, t<sub>R</sub> 4.26 min (95.6%); (2*S*,3*R*)-**4bc**, t<sub>R</sub> 7.47 min (4.4%) (Chiralpak AD, 5% MeOH in CO<sub>2</sub>, 2.0 mL/min, 220 nm, 40 °C)**Table 1 Entry 4: (2*R*,3*S*)-3-((4-Nitrophenyl)thio)-2-phenyltetrahydro-2*H*-pyran (**4bd**)**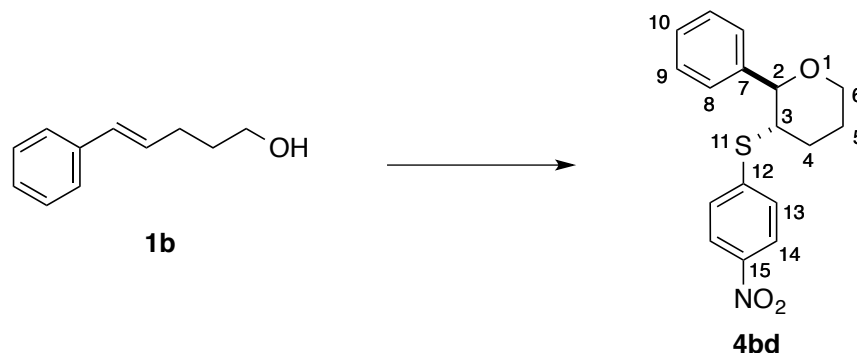

Following General Procedure 2, an oven-dried, 5-mm NMR tube was charged with (*R*)-**3c** (3.8 mg, 7.3 μmol, 0.10 equiv) and sulfenylating agent **2c** (22.8 mg, 75.9 μmol, 1.07 equiv). To this was added **1b** (11.5 mg, 70.9 μmol) in CDCl<sub>3</sub> (0.65 mL) and the NMR tube was cooled in a dry-ice/acetone bath. MsOH (4.5 μL, 70 μmol, 0.99 equiv) was added via syringe and the reaction mixture was kept at -20 °C for 51 h. At this point, the reaction proceeded to ca. 88% conversion by <sup>1</sup>H NMR analysis and was quenched with Et<sub>3</sub>N (0.10 mL). Purification by column chromatography (SiO<sub>2</sub>, 7.0 g, 10 mm Ø, hexane/EtOAc, 20:1→10:1) afforded 16 mg of **4bd**.

Data for **4bd**:<sup>1</sup>H NMR: (500 MHz, CDCl<sub>3</sub>)

δ 7.88–7.84 (m, 2H, HC(14)), 7.34–7.30 (m, 2H, HC(8)), 7.20–7.13 (m, 3H, HC(9), HC(10)), 7.04–6.99 (m, 2H, HC(13)), 4.24 (d, *J* = 9.9 Hz, 1H, HC(2)), 4.18–4.12 (m, 1H, HC(6)), 3.62 (ddd, *J* = 12.5, 12.0, 2.0 Hz, 1H, HC(6)), 3.23 (ddd, *J* = 12.0, 9.9, 4.0 Hz, 1H, HC(3)), 2.43–2.26 (m, 1H, HC(4)), 2.02–1.90 (m, 1H, HC(5)), 1.84–1.71 (m, 2H, HC(4), HC(5))

$^{13}\text{C}$  NMR: (125 MHz,  $\text{CDCl}_3$ )

$\delta$  145.3 (C(aryl)), 145.0 (C(aryl)), 139.4 (C(aryl)), 129.1 (C(aryl)), 128.3 (C(aryl)), 128.2 (C(aryl)), 127.5 (C(aryl)), 123.3 (C(aryl)), 85.2 (C(2)), 68.5 (C(6)), 50.0 (C(3)), 31.8 (C(4)), 26.9 (C(5))

MS: (ESI)

650 (15), 500 (30), 338 (11,  $\text{M}+\text{Na}$ ), 333 (26), 316 (36,  $\text{M}+\text{H}$ ), 282 (30) 161 (100)

HRMS: calcd for  $\text{C}_{17}\text{H}_{18}\text{NO}_3\text{S}^+$ : 316.1007, found: 316.1012

TLC:  $R_f$  0.35 (hexane/EtOAc, 5:1) [CAM]

SFC: (2*R*,3*S*)-**4bd**,  $t_R$  9.00 min (95.7%); (2*S*,3*R*)-**4bd**,  $t_R$  17.44 min (4.3%) (Chiralpak AD, 10% MeOH in  $\text{CO}_2$ , 2.0 mL/min, 220 nm, 40 °C)

**Table 1 Entry 5: (2*R*,3*S*)-2-Phenyl-3-((2-methylphenyl)thio)tetrahydro-2*H*-pyran (**4be**)**

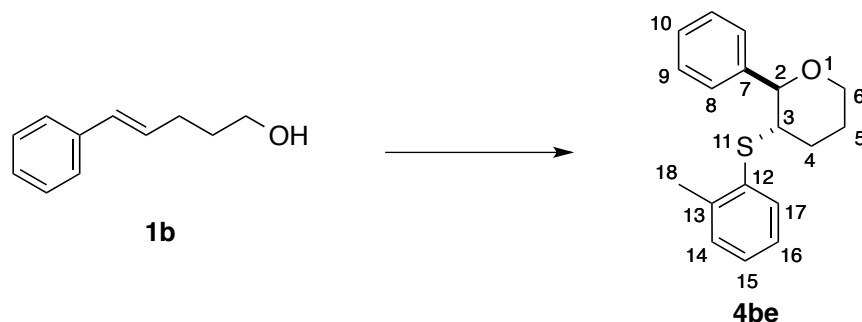

Following General Procedure 2, an oven-dried, 5-mm NMR tube was charged with (*R*)-**3c** (3.6 mg, 6.9  $\mu\text{mol}$ , 0.10 equiv) and sulfonylating agent **2e** (22.6 mg, 83.9  $\mu\text{mol}$ , 1.15 equiv). To this was added **1b** (11.8 mg, 72.7  $\mu\text{mol}$ ) in  $\text{CDCl}_3$  (0.65 mL) and the NMR tube was cooled in a dry-ice/acetone bath.  $\text{MsOH}$  (4.5  $\mu\text{L}$ , 70  $\mu\text{mol}$ , 0.96 equiv) was added via syringe and the reaction mixture was kept at  $-20\text{ }^\circ\text{C}$  for 21 h. At this point, the reaction proceeded to > 95% conversion by  $^1\text{H}$  NMR analysis and was quenched with  $\text{Et}_3\text{N}$  (0.10 mL). Purification by column chromatography ( $\text{SiO}_2$ , 8.0 g, 10 mm  $\varnothing$ , hexane/EtOAc, 60:1) afforded 15 mg of **4be** along with 1% Lewis base contaminant.

Data for **4be**:

$^1\text{H}$  NMR: (500 MHz,  $\text{CDCl}_3$ )

$\delta$  7.39–7.33 (m, 2H, H(8)), 7.30–7.22 (m, 3H, H(9), HC(10)), 7.09–7.02 (m, 3H, HC(aryl)), 6.99–6.94 (m, 1H, HC(aryl)), 4.23 (d,  $J = 10.1$  Hz, 1H, HC(2)), 4.13–4.06 (m, 1H, HC(6)), 3.60 (td,  $J = 11.8, 2.2$  Hz, 1H, HC(6)), 3.23 (ddd,  $J = 11.4,$

10.1, 4.1 Hz, 1H, HC(3)), 2.27–2.20 (m, 1H, HC(4)), 2.22 (s, 3H, HC(18)), 1.89–1.77 (m, 1H, HC(5)), 1.75–1.64 (m, 2H, HC(4), HC(5))

<sup>13</sup>C NMR: (125 MHz, CDCl<sub>3</sub>)

δ 140.4 (C(aryl)), 139.9 (C(aryl)), 133.4 (C(aryl)), 133.1 (C(aryl)), 130.0 (C(aryl)), 128.2 (C(aryl)), 128.1 (C(aryl)), 127.6 (C(aryl)), 127.2 (C(aryl)), 126.0 (C(aryl)), 85.2 (C(2)), 68.6 (C(6)), 50.1 (C(3)), 32.3 (C(4)), 27.0 (C(5)), 20.8 (C(18))

MS: (ES<sup>+</sup>, 70 eV)

284 (100, M<sup>+</sup>), 213 (15), 160 (57), 150 (45), 135 (88), 115 (11), 105 (27), 91 (51), 77 (17)

HRMS: calcd for C<sub>18</sub>H<sub>21</sub>OS<sup>+</sup>: 285.1313, found: 285.1319

TLC: R<sub>f</sub> 0.39 (hexane/EtOAc, 10:1) [CAM]

SFC: (2*R*,3*S*)-**4be**, t<sub>R</sub> 15.01 min (97.2%); (2*S*,3*R*)-**4b3**, t<sub>R</sub> 7.25 min (2.8%) (Chiralpak OD, 10% MeOH in CO<sub>2</sub>, 2.0 mL/min, 220 nm, 40 °C)

**Table 1 Entry 6: (2*R*,3*S*)-3-((2,6-Dimethylphenyl)thio)-2-phenyltetrahydro-2*H*-pyran (**4bf**)**

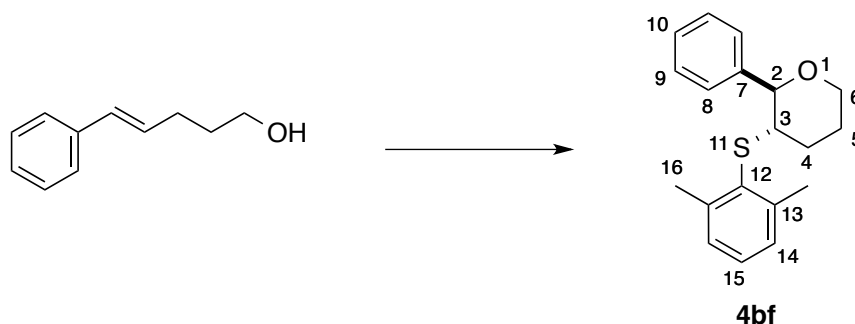

Following General Procedure 2, an oven-dried, 5-mm NMR tube was charged with (*R*)-**3c** (3.6 mg, 6.9 μmol, 0.10 equiv) and sulfenylating agent **2f** (20.9 mg, 73.8 μmol, 1.06 equiv). To this was added **1b** (11.3 mg, 69.7 μmol) in CDCl<sub>3</sub> (0.65 mL) and the NMR tube was cooled in a dry-ice/acetone bath. MsOH (4.5 μL, 70 μmol, 1.0 equiv) was added via syringe and the reaction mixture was kept at –20 °C for 21 h. At this point, the reaction proceeded to full conversion by <sup>1</sup>H NMR analysis and was quenched with Et<sub>3</sub>N (0.10 mL). Purification by column chromatography (SiO<sub>2</sub>, 8.0 g, 10 mm Ø, hexane/EtOAc, 60:1) afforded 18 mg of **4bf**.

Data for **4bf**:

<sup>1</sup>H NMR: (500 MHz, CDCl<sub>3</sub>)

δ 7.41–7.36 (m, 2H, HC(8)), 7.33–7.27 (m, 3H, HC(9), HC(10)), 7.07–7.02 (m, 1H,

HC(15)), 7.02–6.98 (m, 1H, HC(14)), 4.26 (d,  $J = 10.0$  Hz, 1H, HC(2)), 4.10–4.04 (m, 1H, HC(6)), 3.60 (td,  $J = 11.7, 2.4$  Hz, 1H, HC(6)), 3.18 (dt,  $J = 11.1, 4.3$  Hz, 1H, HC(3)), 2.33 (s, 3H, HC(16)), 1.94–1.87 (m, 1H, HC(4)), 1.78–1.68 (m, 1H, HC(5)), 1.67–1.56 (m, 2H, HC(4), HC(5))

SFC: (2*R*,3*S*)-**4bf**,  $t_R$  12.36 min (97.1%); (2*S*,3*R*)-**4bf**,  $t_R$  5.88 min (2.9%) (Chiralpak OD, 10% MeOH in CO<sub>2</sub>, 2.0 mL/min, 220 nm, 40 °C)

Full characterization of compound **4bf** is provided in section Table 2 Entry 2.

**Table 1 Entry 7: (2*R*,3*S*)-3-((2-Ethylphenyl)thio)-2-phenyltetrahydro-2*H*-pyran (**4bg**)**

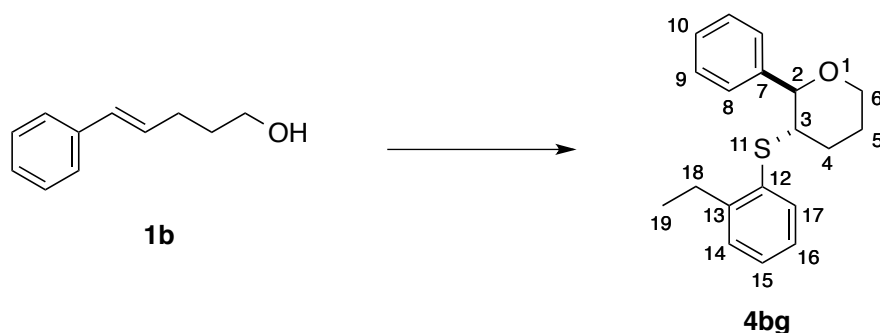

Following General Procedure 2, an oven-dried, 5-mm NMR tube was charged with (*R*)-**3c** (3.6 mg, 6.9  $\mu$ mol, 0.10 equiv) and sulfenylating agent **2g** (22.9 mg, 80.8  $\mu$ mol, 1.18 equiv). To this was added **1b** (11.1 mg, 68.4  $\mu$ mol) in CDCl<sub>3</sub> (0.65 mL) and the NMR tube was cooled in a dry-ice/acetone bath. MsOH (4.5  $\mu$ L, 70  $\mu$ mol, 1.0 equiv) was added via syringe and the reaction mixture was kept at  $-20$  °C for 42 h. At this point, the reaction proceeded to > 95% conversion by <sup>1</sup>H NMR analysis and was quenched with Et<sub>3</sub>N (0.10 mL). Purification by column chromatography (SiO<sub>2</sub>, 8.0 g, 10 mm  $\varnothing$ , hexane/EtOAc, 60:1) afforded 15 mg of **4bg**.

Data for **4bg**:

<sup>1</sup>H NMR: (500 MHz, CDCl<sub>3</sub>)

$\delta$  7.39–7.35 (m, 2H, HC(8)), 7.30–7.23 (m, 3H, HC(9), HC(10)), 7.13–7.06 (m, 3H, HC(aryl)), 7.01–6.96 (m, 1H, HC(aryl)), 4.23 (d,  $J = 10.1$  Hz, 1H, HC(2)), 4.12–4.07 (m, 1H, HC(6)), 3.60 (td,  $J = 11.8, 2.1$  Hz, 1H, HC(6)), 3.24 (ddd,  $J = 11.5, 10.1, 4.0$  Hz, 1H, HC(3)), 2.60 (qd,  $J = 7.4, 3.3$  Hz, 2H, HC(18)), 2.29–2.23 (m, 1H, HC(4)), 1.89–1.77 (m, 1H, HC(5)), 1.77–1.65 (m, 2H, HC(4), HC(5)), 1.09 (t,  $J = 7.5$  Hz, 3H, HC(19))

$^{13}\text{C}$  NMR: (125 MHz,  $\text{CDCl}_3$ )

$\delta$  146.3 (C(13)), 139.9 (C(7)), 133.6 (C(aryl)), 132.6 (C(aryl)), 128.4 (C(aryl)), 128.1 (C(aryl)), 128.1 (C(aryl)), 127.6 (C(aryl)), 127.4 (C(aryl)), 125.9 (C(aryl)), 85.1 (C(2)), 68.6 (C(6)), 50.8 (C(3)), 32.4 (C(4)), 27.1 (C(alkyl)), 27.0 (C(alkyl)), 15.1 (C(19))

MS: ( $\text{ES}^+$ , 70 eV)

298 (100,  $\text{M}^+$ ), 227 (13), 177 (10), 160 (52), 149 (94), 135 (35), 115 (10), 105 (24), 91 (43), 77 (23)

HRMS: calcd for  $\text{C}_{19}\text{H}_{23}\text{OS}^+$ : 299.1470, found: 299.1470

TLC:  $R_f$  0.41 (hexane/EtOAc, 10:1) [CAM]

SFC: (2*R*,3*S*)-**4bg**,  $t_R$  22.30 min (97.5%); (2*S*,3*R*)-**4bg**,  $t_R$  8.99 min (2.5%) (Chiralpak OD, 5% MeOH in  $\text{CO}_2$ , 2.0 mL/min, 220 nm, 40 °C)

**Table 1 Entry 8: (2*R*,3*S*)-3-((2,6-Diethylphenyl)thio)-2-phenyltetrahydro-2*H*-pyran (**4bh**)**

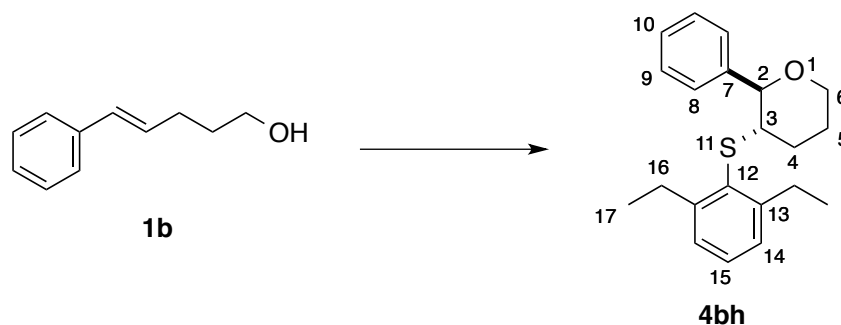

Following General Procedure 2, an oven-dried, 5-mm NMR tube was charged with (*R*)-**3c** (3.5 mg, 6.7  $\mu\text{mol}$ , 0.10 equiv) and sulfenylating agent **2h** (23.0 mg, 73.9  $\mu\text{mol}$ , 1.06 equiv). To this was added **1b** (11.3 mg, 69.7  $\mu\text{mol}$ ) in  $\text{CDCl}_3$  (0.65 mL) and the NMR tube was cooled in a dry-ice/acetone bath. MsOH (4.5  $\mu\text{L}$ , 70  $\mu\text{mol}$ , 1.0 equiv) was added via syringe and the reaction mixture was kept at  $-20\text{ }^\circ\text{C}$  for 24 h. At this point, the reaction proceeded to  $> 95\%$  conversion by  $^1\text{H}$  NMR analysis and was quenched with  $\text{Et}_3\text{N}$  (0.10 mL). Purification by column chromatography ( $\text{SiO}_2$ , 8.0 g, 10 mm  $\varnothing$ , hexane/EtOAc, 60:1) afforded 19 mg of **4bh**.

Data for **4bh**:

$^1\text{H}$  NMR: (400 MHz,  $\text{CDCl}_3$ )

$\delta$  7.42–7.38 (m, 2H, HC(8)), 7.36–7.28 (m, 3H, HC(9), HC(10)), 7.16 (t,  $J = 7.6$  Hz, 1H, HC(15)), 7.03 (d,  $J = 7.5$  Hz, 1H, HC(14)), 4.25 (d,  $J = 10.1$  Hz, 1H, HC(2)),

4.06 (ddd,  $J = 11.5, 4.1, 1.9$  Hz, 1H, HC(6)), 3.59 (td,  $J = 11.3, 2.3$  Hz, 1H, HC(6)), 3.10 (td,  $J = 10.6, 3.9$  Hz, 1H, HC(3)), 2.83–2.63 (m, 4H, HC(16)), 1.93–1.86 (m, 1H, HC(4)), 1.76–1.56 (m, 3H, HC(4), HC(5)), 1.10 (t,  $J = 7.5$  Hz, 6H, HC(17))

SFC: (2*R*,3*S*)-**4bh**,  $t_R$  22.39 min (98.0%); (2*S*,3*R*)-**4bh**,  $t_R$  8.01 min (2.0%) (Chiralpak OD, 5% MeOH in CO<sub>2</sub>, 2.0 mL/min, 220 nm, 40 °C)

Full characterization of compound **4bh** is provided in section Table 2 Entry 3.

**Table 1 Entry 9: (2*R*,3*S*)-3-((2-Isopropylphenyl)thio)-2-phenyltetrahydro-2*H*-pyran (**4bi**)**

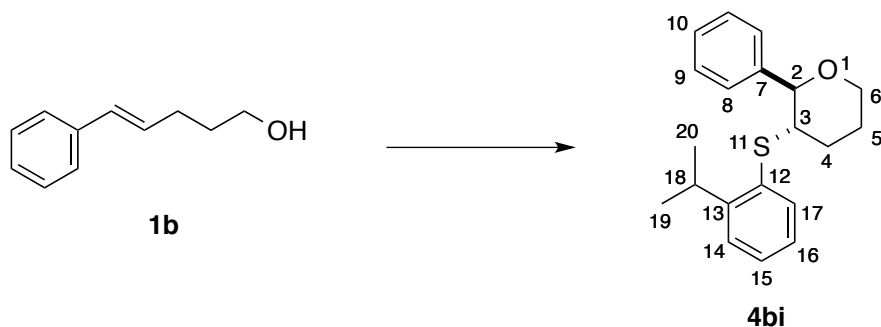

Following General Procedure 2, an oven-dried, 5-mm NMR tube was charged with (*R*)-**3c** (3.4 mg, 6.5  $\mu$ mol, 0.09 equiv) and sulfenylating agent **2i** (22.1 mg, 74.3  $\mu$ mol, 1.08 equiv). To this was added **1b** (11.2 mg, 69.0  $\mu$ mol) in CDCl<sub>3</sub> (0.65 mL) and the NMR tube was cooled in a dry-ice/acetone bath. MsOH (4.5  $\mu$ L, 70  $\mu$ mol, 1.0 equiv) was added via syringe and the reaction mixture was kept at  $-20$  °C for 48 h. At this point, the reaction proceeded to ca. 67% conversion by <sup>1</sup>H NMR analysis and was quenched with Et<sub>3</sub>N (0.10 mL). Purification by column chromatography (SiO<sub>2</sub>, 8.0 g, 10 mm  $\varnothing$ , hexane/EtOAc, 60:1) afforded 11 mg of **4bi**.

Data for **4bi**:

<sup>1</sup>H NMR: (500 MHz, CDCl<sub>3</sub>)

$\delta$  7.40–7.35 (m, 2H, HC(8)), 7.32–7.23 (m, 3H, HC(9), HC(10)), 7.17–7.10 (m, 3H, HC(aryl)), 7.01–6.94 (m, 1H, HC(aryl)), 4.22 (d,  $J = 10.1$  Hz, 1H, HC(2)), 4.11–4.06 (m, 1H, HC(6)), 3.60 (td,  $J = 11.8, 2.1$  Hz, 1H, HC(6)), 3.33 (hept,  $J = 6.9$  Hz, 1H, HC(18)), 3.19 (ddd,  $J = 11.5, 10.1, 4.0$  Hz, 1H, HC(3)), 2.27–2.18 (m, 1H, HC(4)), 1.89–1.77 (m, 1H, HC(5)), 1.77–1.63 (m, 2H, HC(4), HC(5)), 1.10 (d,  $J = 6.9$  Hz, 3H, HC(19)), 1.08 (d,  $J = 6.9$  Hz, 3H, HC(20))

<sup>13</sup>C NMR: (125 MHz, CDCl<sub>3</sub>)

$\delta$  150.9 (C(13)), 140.0 (C(7)), 134.0 (C(aryl)), 132.1 (C(aryl)), 128.2 (C(aryl)),



128.1 (C(aryl)), 127.7 (C(aryl)), 127.6 (C(aryl)), 125.7 (C(aryl)), 125.5 (C(aryl)), 85.0 (C(2)), 68.6 (C(6)), 51.3 (C(3)), 32.4 (C(4)), 30.2 (C(18)), 27.1 (C(5)), 23.8 (C(19)), 23.5 (C(20))

MS: (ES<sup>+</sup>, 70eV)

312 (100, M<sup>+</sup>), 241 (12), 207 (6), 191 (6), 163 (87), 149 (40), 135 (24), 115 (14), 105 (23), 91 (50), 77 (15)

HRMS: calcd for C<sub>20</sub>H<sub>25</sub>OS<sup>+</sup>: 313.1626, found: 313.1627

TLC: R<sub>f</sub> 0.43 (hexane/EtOAc, 10:1) [CAM]

SFC: (2*R*,3*S*)-**4bi**, t<sub>R</sub> 17.49 min (96.3%); (2*S*,3*R*)-**4bi**, t<sub>R</sub> 7.49 min (3.7%) (Chiralpak OD, 5% MeOH in CO<sub>2</sub>, 2.0 mL/min, 220 nm, 40 °C)

**Table 1 Entries 10–12: (2*R*,3*S*)-3-((2,6-Diisopropylphenyl)thio)-2-phenyltetrahydro-2*H*-pyran (**4bj**)**

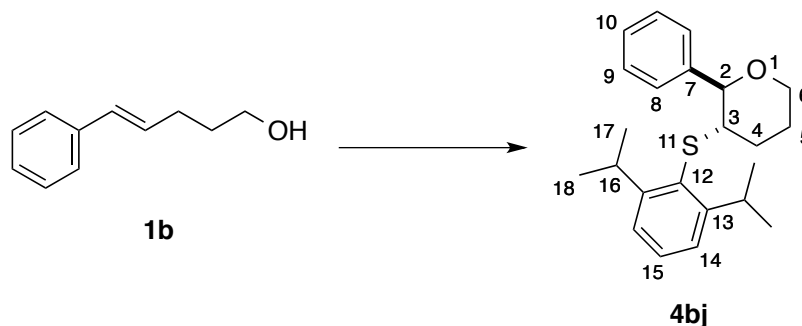

**Entry 10 (Reaction at –20 °C).** Following General Procedure 2, an oven-dried, 5-mm NMR tube was charged with (*R*)-**3c** (3.8 mg, 7.3 μmol, 0.11 equiv) and sulfenylating agent **2j** (25.5 mg, 75.1 μmol, 1.07 equiv). To this was added **1b** (11.3 mg, 69.7 μmol) in CDCl<sub>3</sub> (0.65 mL) and the NMR tube was cooled in a dry-ice/acetone bath. MsOH (4.5 μL, 70 μmol, 1.0 equiv) was added via syringe and the reaction mixture was kept at –20 °C for 65 h. At this point, the reaction proceeded to ca. 70% conversion by <sup>1</sup>H NMR analysis and was quenched with Et<sub>3</sub>N (0.10 mL). Purification by column chromatography (SiO<sub>2</sub>, 8.0 g, 10 mm Ø, hexane/EtOAc, 60:1) afforded 11 mg of **4bj** along with small impurities.

SFC: (2*R*,3*S*)-**4bj**, t<sub>R</sub> 15.83 min (99.1%); (2*S*,3*R*)-**4bj**, t<sub>R</sub> 6.54 min (0.9%) (Chiralpak OD, 5% MeOH in CO<sub>2</sub>, 2.0 mL/min, 220 nm, 40 °C)

**Entry 11 (Reaction at 0 °C).** Following General Procedure 2, an oven-dried, 5-mm NMR tube was charged with (*R*)-**3c** (3.5 mg, 6.7  $\mu$ mol, 0.10 equiv) and sulfenylating agent **2j** (22.2 mg, 65.4  $\mu$ mol). To this was added **1b** (10.7 mg, 66.0  $\mu$ mol, 1.00 equiv) in  $\text{CDCl}_3$  (0.65 mL) and the NMR tube was cooled in a dry-ice/acetone bath. MsOH (4.3  $\mu$ L, 67  $\mu$ mol, 1.0 equiv) was added via syringe and the reaction mixture was kept at 0 °C for 24 h. At this point, the reaction proceeded to ca. 80% conversion by  $^1\text{H}$  NMR analysis and was quenched with  $\text{Et}_3\text{N}$  (0.10 mL). Purification by column chromatography ( $\text{SiO}_2$ , 9.0 g, 10 mm  $\varnothing$ , hexane/EtOAc, 60:1) afforded 13 mg of **4bj** along with small impurities.

SFC: (*2R,3S*)-**4bj**,  $t_R$  15.52 min (99.0%); (*2S,3R*)-**4bj**,  $t_R$  6.49 min (1.0%) (Chiralpak OD, 5% MeOH in  $\text{CO}_2$ , 2.0 mL/min, 220 nm, 40 °C)

**Entry 12 (Reaction at room temperature).** Following General Procedure 2, an oven-dried, 5-mm NMR tube was charged with (*R*)-**3c** (3.4 mg, 6.5  $\mu$ mol, 0.10 equiv) and sulfenylating agent **2j** (22.9 mg, 67.4  $\mu$ mol, 1.03 equiv). To this was added **1b** (10.6 mg, 65.3  $\mu$ mol) in  $\text{CDCl}_3$  (0.65 mL) and the NMR tube was cooled in a dry-ice/acetone bath. MsOH (4.2  $\mu$ L, 65  $\mu$ mol, 1.0 equiv) was added via syringe and the reaction mixture was kept at 0 °C for 24 h. At this point, the reaction proceeded to ca. 80% conversion by  $^1\text{H}$  NMR analysis and was quenched with  $\text{Et}_3\text{N}$  (0.10 mL). Purification by column chromatography ( $\text{SiO}_2$ , 9.0 g, 10 mm  $\varnothing$ , hexane/EtOAc, 60:1) afforded 13 mg of **4bj** along with small impurities.

SFC: (*2R,3S*)-**4bj**,  $t_R$  15.38 min (98.0%); (*2S,3R*)-**4bj**,  $t_R$  6.42 min (2.0%) (Chiralpak OD, 5% MeOH in  $\text{CO}_2$ , 2.0 mL/min, 220 nm, 40 °C)

Full characterization of compound **4bj** is provided in section Table 2 Entry 4.

**Table 1 Entry 13: (*2R,3S*)-3-((2,6-Diisopropoxyphenyl)thio)-2-phenyltetrahydro-2*H*-pyran (**4bk**)**

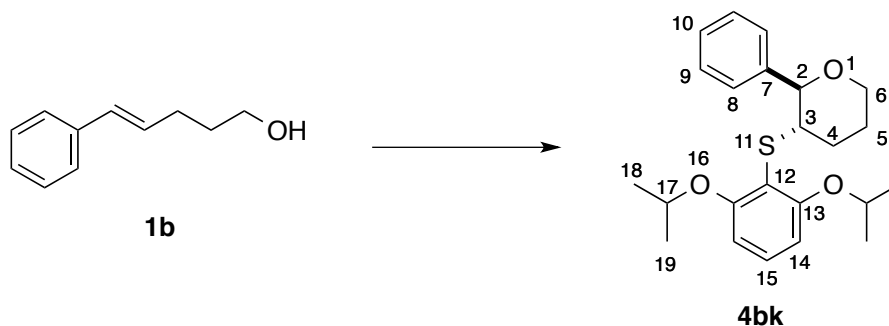

Following General Procedure 2, an oven-dried, 5-mm NMR tube was charged with (*R*)-**3c** (3.2 mg, 6.1  $\mu$ mol, 0.10 equiv) and sulfenylating agent **2k** (27.1 mg, 73.0  $\mu$ mol, 1.22 equiv). To this was added **1b** (9.7 mg, 60  $\mu$ mol) in  $\text{CDCl}_3$  (0.70 mL) and the NMR tube was cooled in a dry-ice/acetone bath. MsOH (4.5  $\mu$ L, 70  $\mu$ mol, 1.2 equiv) was added via syringe and the reaction mixture was kept at  $-20\text{ }^\circ\text{C}$  for 24 h. At this point, the reaction proceeded to ca. 80% conversion by  $^1\text{H}$  NMR analysis and was quenched with  $\text{Et}_3\text{N}$  (0.10 mL). Purification by column chromatography ( $\text{SiO}_2$ , 8.0 g, 10 mm  $\varnothing$ , hexane/EtOAc, 60:1 $\rightarrow$ 20:1) afforded 13 mg of **4bk**.

Data for **4bk**:

$^1\text{H}$  NMR: (400 MHz,  $\text{CDCl}_3$ )

$\delta$  7.41–7.34 (m, 2H, HC(8)), 7.24–7.15 (m, 3H, HC(9), HC(10)), 7.03 (t,  $J = 8.3$  Hz, 1H, HC(15)), 6.37 (d,  $J = 8.3$  Hz, 2H, HC(14)), 4.43 (hept,  $J = 6.1$  Hz, 2H, HC(17)), 4.26 (d,  $J = 10.2$  Hz, 1H, HC(2)), 4.08–4.02 (m, 1H, HC(6)), 3.60 (td,  $J = 11.0$ , 4.3 Hz, 1H, HC(6)), 3.58 (td,  $J = 11.7$ , 2.4 Hz, 1H, HC(3)), 2.07–1.99 (m, 1H, HC(4)), 1.83–1.53 (m, 3H, HC(4), HC(5)), 1.35 (d,  $J = 6.1$  Hz, 6H, HC(18)), 1.32 (d,  $J = 6.1$  Hz, 6H, HC(19))

$^{13}\text{C}$  NMR: (125 MHz,  $\text{CDCl}_3$ )

$\delta$  159.5 (C(13)), 139.9 (C(7)), 128.5 (C(aryl)), 127.9 (C(aryl)), 127.8 (C(aryl)), 127.7 (C(aryl)), 111.9 (C(12)), 106.5 (C(14)), 85.4 (C(2)), 70.9 (C(17)), 68.6 (C(6)), 46.6 (C(3)), 31.3 (C(4)), 27.1 (C(5)), 22.2 (C(18)), 22.1 (C(19))

MS: ( $\text{ES}^+$ , 70 eV)

315 (29), 273 (41), 226 (50), 194 (29), 184 (26), 168 (21), 161 (84), 153 (100), 142 (66), 131 (9), 115 (9), 105 (34), 91 (87), 77 (12)

HRMS: calcd for  $\text{C}_{23}\text{H}_{31}\text{O}_3\text{S}^+$ : 387.1994, found: 387.1995

TLC:  $R_f$  0.40 (hexane/EtOAc, 6:1) [CAM]

SFC: (*2R,3S*)-**4bk**,  $t_R$  13.15 min (98.0%); (*2S,3R*)-**4bk**,  $t_R$  7.40 min (2.0%) (Chiralpak OD, 5% MeOH in  $\text{CO}_2$ , 2.0 mL/min, 220 nm,  $40\text{ }^\circ\text{C}$ )

**Table 1 Entry 14: (2*R*,3*S*)-3-((3,5-Diisopropylphenyl)thio)-2-phenyltetrahydro-2*H*-pyran (4*bl*)**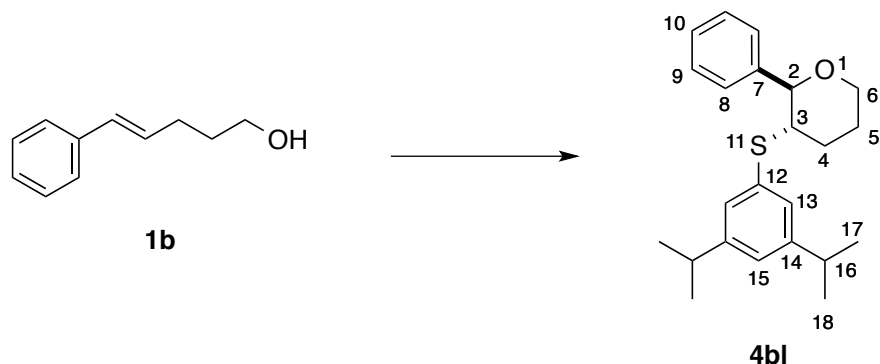

Following General Procedure 2, an oven-dried, 5-mm NMR tube was charged with (*R*)-**3c** (3.3 mg, 6.3  $\mu\text{mol}$ , 0.09 equiv) and sulfenylating agent **2i** (25.3 mg, 74.5  $\mu\text{mol}$ , 1.09 equiv). To this was added **1b** (11.1 mg, 68.4  $\mu\text{mol}$ ) in  $\text{CDCl}_3$  (0.65 mL) and the NMR tube was cooled in a dry-ice/acetone bath. MsOH (4.5  $\mu\text{L}$ , 70  $\mu\text{mol}$ , 1.0 equiv) was added via syringe and the reaction mixture was kept at  $-20^\circ\text{C}$  for 48 h. At this point, the reaction proceeded to ca. 80% conversion by  $^1\text{H}$  NMR analysis and was quenched with  $\text{Et}_3\text{N}$  (0.10 mL). Purification by column chromatography ( $\text{SiO}_2$ , 8.0 g, 10 mm  $\varnothing$ , hexane/EtOAc, 60:1) afforded 10 mg of **4bl**.

**Data for 4bl:**

$^1\text{H}$  NMR: (500 MHz,  $\text{CDCl}_3$ )

$\delta$  7.38–7.34 (m, 2H, HC(8)), 7.29–7.21 (m, 3H, HC(9), HC(10)), 6.84 (t,  $J = 1.6$  Hz, 1H, HC(15)), 6.75 (d,  $J = 1.6$  Hz, 2H, HC(13)), 4.18 (d,  $J = 10.1$  Hz, 1H, HC(2)), 4.11–4.06 (m, 1H, HC(6)), 3.56 (td,  $J = 11.7, 2.0$  Hz, 1H, HC(6)), 3.58 (ddd,  $J = 11.6, 10.1, 4.0$  Hz, 1H, HC(3)), 2.74 (hept,  $J = 6.8$  Hz, 2H, HC(16)), 2.38–2.30 (m, 1H, HC(4)), 1.93–1.82 (m, 1H, HC(5)), 1.77–1.65 (m, 2H, HC(4), HC(5)), 1.18 (d,  $J = 6.8$  Hz, 6H, HC(17)), 1.17 (d,  $J = 6.8$  Hz, 6H, HC(18))

$^{13}\text{C}$  NMR: (125 MHz,  $\text{CDCl}_3$ )

$\delta$  149.1 (C(14)), 140.1 (C(7)), 133.1 (C(aryl)), 128.4 (C(aryl)), 128.1 (C(aryl)), 128.1 (C(aryl)), 127.8 (C(aryl)), 123.8 (C(aryl)), 85.4 (C(2)), 68.5 (C(6)), 50.7 (C(3)), 33.9 (C(16)), 32.5 (C(4)), 27.1 (C(5)), 23.9 (C(17)), 23.8 (C(18))

MS: ( $\text{ES}^+$ , 70 eV)

283 (53), 220 (25), 205 (20), 195 (45), 177 (21), 160 (100), 149 (17), 135 (67), 115 (15), 105 (35), 91 (53), 77 (16)

HRMS: calcd for C<sub>23</sub>H<sub>31</sub>OS<sup>+</sup>: 355.2096, found: 355.2106

TLC: *R<sub>f</sub>* 0.48 (hexane/EtOAc, 10:1) [CAM]

SFC: (2*R*,3*S*)-**4bl**, *t<sub>R</sub>* 18.45 min (94.0%); (2*S*,3*R*)-**4bl**, *t<sub>R</sub>* 8.76 min (6.0%) (Chiralpak OD, 3% MeOH in CO<sub>2</sub>, 2.0 mL/min, 220 nm, 40 °C)

**Table 1 Entry 15: (2*R*,3*S*)-3-(1-Naphthalenylthio)-2-phenyltetrahydro-2*H*-pyran (**4bm**)**

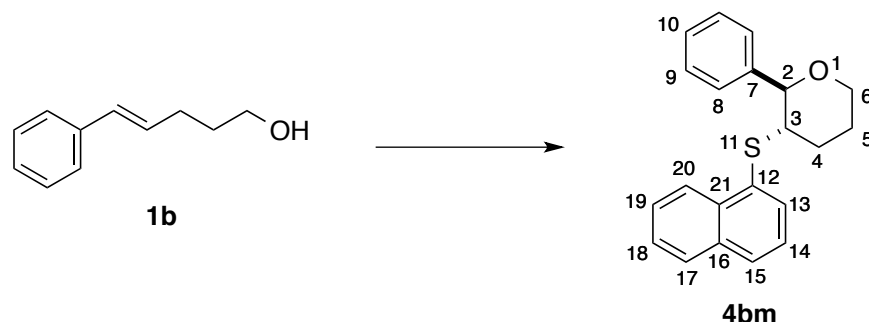

Following General Procedure 2, an oven-dried, 5-mm NMR tube was charged with (*R*)-**3c** (3.6 mg, 6.9 μmol, 0.10 equiv) and sulfenylating agent **2m** (22.6 mg, 74.0 μmol, 1.05 equiv). To this was added **1b** (11.3 mg, 69.7 μmol) in CDCl<sub>3</sub> (0.65 mL) and the NMR tube was cooled in a dry-ice/acetone bath. MsOH (4.5 μL, 70 μmol, 1.0 equiv) was added via syringe and the reaction mixture was kept at -20 °C for 21 h. At this point, the reaction proceeded to ca. 95% conversion by <sup>1</sup>H NMR analysis and was quenched with Et<sub>3</sub>N (0.10 mL). Purification by column chromatography (SiO<sub>2</sub>, 8.0 g, 10 mm Ø, hexane/EtOAc, 60:1) afforded 23 mg of **4bm** along with 10% Lewis base contaminant.

Data for **4bm**:

<sup>1</sup>H NMR: (500 MHz, CDCl<sub>3</sub>)

δ 8.16–8.11 (m, 1H, HC(aryl)), 7.82–7.78 (m, 1H, HC(aryl)), 7.72 (d, *J* = 8.2 Hz, 1H, HC(aryl)), 7.49–7.45 (m, 2H, HC(aryl)), 7.39–7.34 (m, 3H, HC(aryl)), 7.29–7.25 (m, 3H, HC(aryl)), 7.22 (dd, *J* = 8.2, 7.1 Hz, 1H, HC(aryl)), 4.29 (d, *J* = 10.2 Hz, 1H, HC(2)), 4.11–4.02 (m, 1H, HC(6)), 3.62–3.55 (m, 1H, HC(6)), 3.28–3.20 (m, 1H, HC(3)), 2.23–2.16 (m, 1H, HC(4)), 1.79–1.64 (m, 3H, HC(4), HC(5))

<sup>13</sup>C NMR: (125 MHz, CDCl<sub>3</sub>)

δ 140.0 (C(aryl)), 134.5 (C(aryl)), 134.0 (C(aryl)), 133.6 (C(aryl)), 130.8 (C(aryl)), 128.7 (C(aryl)), 128.4 (C(aryl)), 128.3 (C(aryl)), 128.2 (C(aryl)), 128.1 (C(aryl)), 127.7 (C(aryl)), 126.5 (C(aryl)), 126.0 (C(aryl)), 125.2 (C(aryl)), 85.2 (C(2)), 68.5

(C(6)), 50.9 (C(3)), 32.3 (C(4)), 27.0 (C(5))

MS: (ESI)

458 (100), 321 (58, M+H), 303 (69), 161 (27)

HRMS: calcd for C<sub>21</sub>H<sub>21</sub>OS<sup>+</sup>: 321.1313, found: 321.1315

TLC: *R<sub>f</sub>* 0.33 (hexane/EtOAc, 10:1) [CAM]

SFC: (2*R*,3*S*)-**4bm**, *t<sub>R</sub>* 19.36 min (92.6%); (2*S*,3*R*)-**4bm**, *t<sub>R</sub>* 11.89 min (7.4%) (Chiralpak OD, 15% MeOH in CO<sub>2</sub>, 2.0 mL/min, 220 nm, 40 °C)

**Table 1 Entry 16: (2*R*,3*S*)-3-(2-Naphthalenylthio)-2-phenyltetrahydro-2*H*-pyran (**4bn**)**

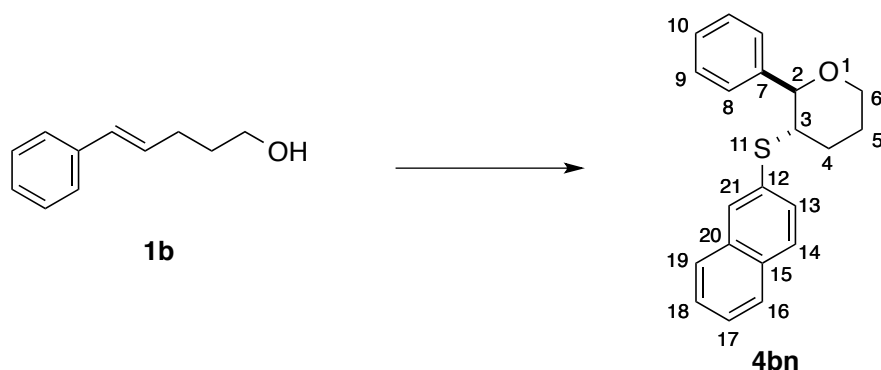

Following General Procedure 2, an oven-dried, 5-mm NMR tube was charged with (*R*)-**3c** (3.5 mg, 6.7 μmol, 0.10 equiv) and sulfonylating agent **2n** (22.6 mg, 74.0 μmol, 1.05 equiv). To this was added **1b** (11.3 mg, 69.7 μmol) in CDCl<sub>3</sub> (0.65 mL) and the NMR tube was cooled in a dry-ice/acetone bath. MsOH (4.5 μL, 70 μmol, 1.0 equiv) was added via syringe and the reaction mixture was kept at -20 °C for 48 h. At this point, the reaction proceeded to ca. 90% conversion by <sup>1</sup>H NMR analysis and was quenched with Et<sub>3</sub>N (0.10 mL). Purification by column chromatography (SiO<sub>2</sub>, 8.0 g, 10 mm Ø, hexane/EtOAc, 60:1) afforded 14 mg of **4bn** along with 1% Lewis base contaminant.

Data for **4bn**:

<sup>1</sup>H NMR: (500 MHz, CDCl<sub>3</sub>)

δ 7.77–7.70 (m, 1H, HC(aryl)), 7.64–7.59 (m, 2H, HC(aryl)), 7.50 (s, 1H, HC(21)), 7.46–7.36 (m, 4H, HC(aryl)), 7.27–7.16 (m, 4H, HC(aryl)), 4.24 (d, *J* = 10.1 Hz, 1H, HC(2)), 4.12–4.06 (m, 1H, HC(6)), 3.61–3.53 (m, 1H, HC(6)), 3.35–3.27 (m, 1H, HC(3)), 2.37–2.27 (m, 1H, HC(4)), 1.94–1.69 (m, 3H, HC(4), HC(5))

MS: (ESI)

458 (100), 369 (35), 321 (58, M+H), 303 (21), 161 (94)

HRMS: calcd for C<sub>21</sub>H<sub>21</sub>OS<sup>+</sup>: 321.1313, found: 321.1313

TLC: R<sub>f</sub> 0.41 (hexane/EtOAc, 6:1) [CAM]

SFC: (2*R*,3*S*)-**4bn**, t<sub>R</sub> 18.70 min (91.8%); (2*S*,3*R*)-**4bn**, t<sub>R</sub> 26.85 min (8.2%) (Chiralpak AD, 5% MeOH in CO<sub>2</sub>, 2.0 mL/min, 220 nm, 40 °C)

### Substrate Scope Survey (Table 2)

#### General Procedure 3: Sulfenofunctionalisation Using Sterically Demanding Sulfenylating Agents

Following the literature procedure,<sup>16</sup> an oven-dried Schlenk flask was charged with the sulfenylating agent (1.05 mmol, 1.05 equiv), catalyst (*R*)-**3c** (52.0 mg, 0.100 mmol, 0.100 equiv), the corresponding alkene (1.00 mmol), nucleophile (if indicated, 1.00 mmol, 1.00 equiv) and CH<sub>2</sub>Cl<sub>2</sub>. The flask was capped with a septum and placed into an *i*-PrOH bath, which was cooled to the appropriate temperature using a cryocool unit. The temperature of the mixture was monitored via a thermocouple digital temperature probe. After the temperature stabilized, MsOH (65 μL, 1.0 mmol, 1.0 equiv) was added via syringe and the mixture was allowed to stir for the indicated time. Upon complete reaction (TLC monitoring) the mixture was quenched while cold by the addition of Et<sub>3</sub>N (0.20 mL). The mixture was poured into aqueous HCl (1.0 M, 20 mL) in a separatory funnel, CH<sub>2</sub>Cl<sub>2</sub> (30 mL) was added and the layers were thoroughly mixed. The organic layer was poured into aqueous NaOH (1.0 M, 20 mL), and the layers were thoroughly mixed and then separated. The acidic layer was back-extracted with CH<sub>2</sub>Cl<sub>2</sub> (30 mL) which was poured into the basic layer and used to extract that layer as well. Both organic portions were combined, dried over MgSO<sub>4</sub>, filtered through glass wool and concentrated in vacuo (20–23 °C, 20 mmHg). The products were purified by silica gel column chromatography using silica gel.

## Sulfenofunctionalisation Using Sterically Demanding Sulfenylating Agents

Preparation of (2*R*,3*S*)-2-Phenyl-3-(phenylthio)tetrahydro-2*H*-pyran (**4ba**) (Table 2, Entry 1)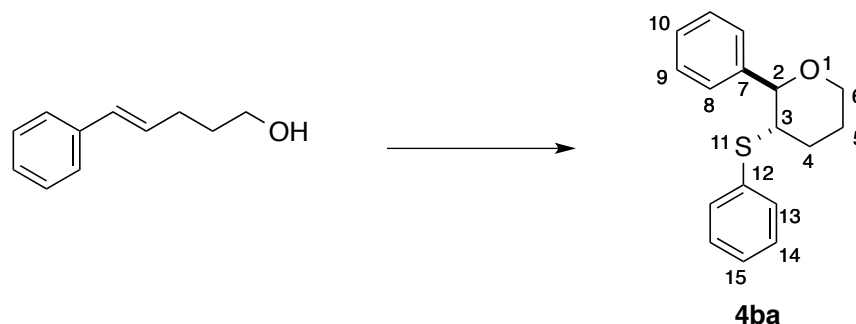

Since **4ba** is a known compound,<sup>16</sup> the thioetherification reaction was conducted on a 0.20 mmol scale. Following General Procedure 3, an oven-dried, 6 dram vial was charged with the sulfenylating agent (51 mg, 0.20 mmol, 1.0 equiv), catalyst (*R*)-**3c** (10.4 mg, 0.020 mmol, 0.100 equiv), **2a** (32 mg, 0.20 mmol) and CH<sub>2</sub>Cl<sub>2</sub> (1.0 mL). The vial was capped with a polypropylene open hole cap and cooled to -20 °C in an *i*-PrOH bath. After 15 min at this temperature, MsOH (12.9 μL, 20.0 μmol, 1.00 equiv) was added and the mixture was allowed to stir for 36 h. The reaction was worked up following the general procedure (the amounts of CH<sub>2</sub>Cl<sub>2</sub>, HCl and NaOH were proportionally decreased for the 0.20 mmol scale). Purification by chromatography (SiO<sub>2</sub>, 30 g, 20 mm Ø, hexane/MTBE, 60:1→30:1) afforded **4ba** (42 mg, 78%) as a yellowish oil, which solidified upon standing. The spectroscopic data match those published in the literature.<sup>16</sup>

Data for **4ba**:

<sup>1</sup>H NMR: (500 MHz, CDCl<sub>3</sub>)

δ 7.39–7.35 (m, 2H, H(C(8))), 7.31–7.23 (m, 3H, H(C(9), HC(10))), 7.16–7.09 (m, 5H, H(C(aryl))), 4.20 (d, *J* = 10.1 Hz, 1H, HC(2)), 4.12–4.06 (m, 1H, HC(6)), 3.57 (td, *J* = 12.1, 2.1 Hz, 1H, HC(6)), 3.24 (ddd, *J* = 11.5, 10.1, 4.0 Hz, 1H, HC(3)), 2.33–2.26 (m, 1H, HC(4)), 1.92–1.80 (m, 1H, HC(5)), 1.76–1.63 (m, 2H, HC(4), HC(5)).

SFC: (2*R*,3*S*)-**4ba**, *t*<sub>R</sub> 6.03 min (95.6%); (2*S*,3*R*)-**4ba**, *t*<sub>R</sub> 8.30 min (4.4%) (Chiralpak AD, 5% MeOH in CO<sub>2</sub>, 2.0 mL/min, 220 nm, 40 °C)



**Preparation of (2*R*,3*S*)-3-((2,6-Dimethylphenyl)thio)-2-phenyltetrahydro-2*H*-pyran (4**bf**)**  
**(Table 2, Entry 2)**

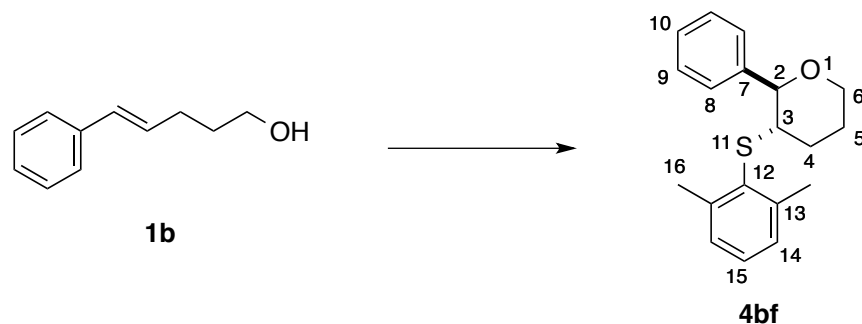

Following General Procedure 3, an oven-dried Schlenk flask was charged with **2f** (287 mg, 1.01 mmol, 1.01 equiv), catalyst (*R*)-**3c** (51.0 mg, 0.098 mmol, 0.098 equiv), **1b** (162 mg, 1.00 mmol), and CH<sub>2</sub>Cl<sub>2</sub> (5.0 mL). The mixture was cooled to –20 °C in an *i*-PrOH bath. MsOH (65 μL, 1.0 mmol, 1.0 equiv) was added via syringe and the mixture was allowed to stir for 36 h at –20 °C. The reaction was worked up following the general procedure. Purification by column chromatography (SiO<sub>2</sub>, 150 g, 40 mm Ø, hexane/EtOAc, 60:1→30:1) afforded 191 mg of pure **4bf** along with a mixed fraction containing **4bf** and catalyst (*R*)-**3c**. The mixed fraction was subjected to a second purification by column chromatography (SiO<sub>2</sub>, 65 g, 35 mm Ø, hexane/MTBE, 100:1→60:1) yielding another 60 mg of pure **4bf** (combined yield: 251 mg, 84%, pale yellow oil). An analytically pure sample was obtained by Kugelrohr distillation.

Data for **4bf**:

bp: 171 °C (ABT), 0.3 mmHg

<sup>1</sup>H NMR: (500 MHz, CDCl<sub>3</sub>)

δ 7.41–7.36 (m, 2H, HC(8)), 7.33–7.27 (m, 3H, HC(9), HC(10)), 7.07–7.02 (m, 1H, HC(15)), 7.02–6.98 (m, 2H, HC(14)), 4.26 (d, *J* = 10.0 Hz, 1H, HC(2)), 4.10–4.04 (m, 1H, HC(6)), 3.60 (td, *J* = 11.7, 2.4 Hz, 1H, HC(6)), 3.18 (dt, *J* = 11.1, 4.3 Hz, 1H, HC(3)), 2.33 (s, 6H, HC(16)), 1.94–1.87 (m, 1H, HC(4)), 1.78–1.68 (m, 1H, HC(5)), 1.67–1.56 (m, 2H, HC(4) and HC(5))

<sup>13</sup>C NMR: (125 MHz, CDCl<sub>3</sub>)

143.3 (C(13)), 139.8 (C(7)), 131.5 (C(12)), 128.3 (C(aryl)), 128.1 (C(aryl)), 127.9 (C(aryl)), 127.8 (C(aryl)), 127.5 (C(aryl)), 85.1 (C(2)), 68.6 (C(6)), 48.9 (C(3)), 31.6 (C(4)), 26.9 (C(5)), 22.1 (C(16))

IR: (NaCl plate)

3058 (m), 3031 (m), 2945 (s), 2848 (s), 2722 (m), 1941 (w), 1869 (w), 1801 (w), 1657 (w), 1582 (m), 1492 (m), 1459 (s), 1435 (m), 1374 (m), 1326 (m), 1286 (w), 1260 (m), 1226 (w), 1208 (w), 1178 (m), 1104 (s), 1079 (s), 1027 (s), 968 (m), 943 (m), 906 (m), 883 (m), 852 (w), 820 (m), 772 (s), 754 (s)

MS: (ES<sup>+</sup>, 70 eV)

298 (88, M<sup>+</sup>), 227 (21), 207 (5), 192 (5), 177 (20), 160 (69), 149 (100), 134 (15), 115 (10), 105 (35), 91 (60), 77 (25), 65 (5)

HRMS: calcd for C<sub>19</sub>H<sub>23</sub>OS<sup>+</sup>: 299.1470, found: 299.1468

TLC: R<sub>f</sub> 0.34 (hexane/EtOAc, 15:1) [CAM]

Opt. Rot. : [α]<sub>D</sub><sup>24</sup> -13.8 (c = 0.57, CHCl<sub>3</sub>)

SFC: (2*R*,3*S*)-**4bf**, t<sub>R</sub> 12.36 min (97.6%); (2*S*,3*R*)-**4bf**, t<sub>R</sub> 5.88 min (2.4%) (Chiralpak OD, 10% MeOH in CO<sub>2</sub>, 2.0 mL/min, 220 nm, 40 °C)

Analysis: C<sub>19</sub>H<sub>22</sub>OS (298.44)

Calcd: C, 76.47; H, 7.43;

Found: C, 76.65; H, 7.25;

**Preparation of (2*R*,3*S*)-3-((2,6-Diethylphenyl)thio)-2-phenyltetrahydro-2*H*-pyran (**4bh**) and (*R*)-2-((*S*)-((2,6-Diethylphenyl)thio)(phenyl)methyl)tetrahydrofuran (**4bh'**) (Table 2, Entry 3)**

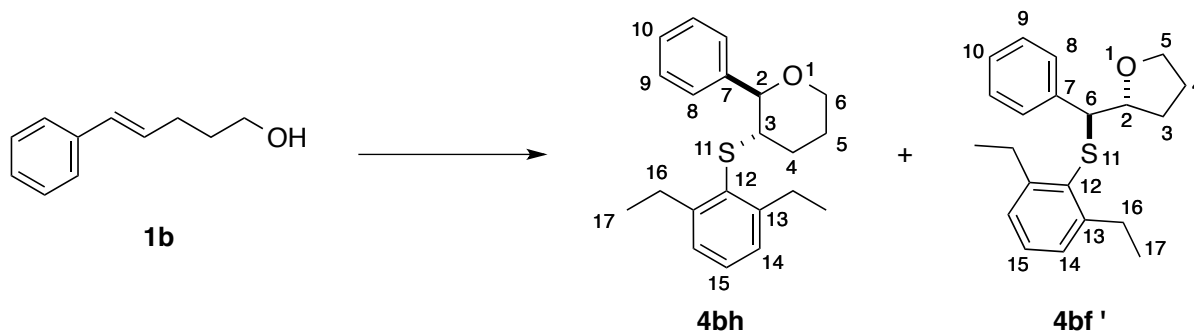

Following General Procedure 3, an oven-dried Schlenk flask was charged with **2h** (315 mg, 1.01 mmol, 1.02 equiv), catalyst (*R*)-**3c** (52.7 mg, 0.101 mmol, 0.101 equiv), **1b** (161 mg, 0.992 mmol), and CH<sub>2</sub>Cl<sub>2</sub> (5.0 mL). The mixture was cooled to -20 °C in an *i*-PrOH bath. MsOH (65 μL, 1.0 mmol, 1.0 equiv) was added via syringe and the mixture was allowed to stir for 36 h at -20 °C. The reaction was worked up following the general procedure. Purification

by column chromatography (SiO<sub>2</sub>, 65 g, 35 mm Ø, hexane/MTBE, 100:1) afforded 285 mg (87%) of a 97:3 mixture of **4bh** and **4bh'** as a pale yellow oil. An analytically pure sample was obtained by Kugelrohr distillation.

Data for isomer mixture:

bp: 171°C (ABT), 0.3 mmHg

IR: (NaCl plate)

3052 (m), 3032 (m), 2962 (s), 2850 (s), 2718 (w), 1941 (w), 1863 (w), 1797 (w), 1573 (m), 1493 (m), 1454 (s), 1433 (m), 1371 (m), 1326 (m), 1306 (m), 1260 (m), 1225 (w), 1170 (m), 1105 (s), 1079 (s), 1027 (s), 999 (w), 968 (m), 943 (m), 905 (w), 883 (m), 853 (w), 800 (m), 754 (s)

TLC: *R<sub>f</sub>* 0.39 (hexanes/EtOAc, 15:1) [CAM]

HRMS: calcd for C<sub>21</sub>H<sub>27</sub>OS<sup>+</sup>: 327.1783, found: 327.1781

Opt. Rot. : [ $\alpha$ ]<sub>D</sub><sup>24</sup> -3.6 (c = 0.57, CHCl<sub>3</sub>)

Analysis: C<sub>21</sub>H<sub>26</sub>OS (326.50)

Calcd: C, 77.25; H, 8.03;

Found: C, 77.09; H, 7.98;

Data for **4bh**:

<sup>1</sup>H NMR: (500 MHz, CDCl<sub>3</sub>)

$\delta$  7.42–7.38 (m, 2H, HC(8)), 7.36–7.28 (m, 3H, HC(9), HC(10)), 7.16 (t, *J* = 7.6 Hz, 1H, HC(15)), 7.03 (d, *J* = 7.5 Hz, 2H, HC(14)), 4.25 (d, *J* = 10.1 Hz, 1H, HC(2)), 4.06 (ddd, *J* = 11.5, 4.1, 1.9 Hz, 1H, HC(6)), 3.59 (td, *J* = 11.3, 2.3 Hz, 1H, HC(6)), 3.10 (td, *J* = 10.6, 3.9 Hz, 1H, HC(3)), 2.83–2.63 (m, 4H, HC(16)), 1.93–1.86 (m, 1H, HC(4)), 1.76–1.56 (m, 3H, HC(4), HC(5)), 1.10 (t, *J* = 7.5 Hz, 6H, HC(17))

<sup>13</sup>C NMR: (125 MHz, CDCl<sub>3</sub>)

149.4 (C(13)), 139.9 (C(7)), 130.3 (C(12)), 128.5 (C(aryl)), 128.3 (C(aryl)), 128.1 (C(aryl)), 127.5 (C(aryl)), 126.2 (C-(aryl)), 84.8 (C(2)), 68.6 (C(6)), 50.5 (C(3)), 31.7 (C(4)), 28.1 (C(16)), 26.9 (C(5)), 15.6 (C(17))

MS: (ES<sup>+</sup>, 70 eV)

326 (100, M<sup>+</sup>), 225 (19), 217 (6), 205 (5), 192 (17), 177 (56), 161 (61), 149 (31), 135 (27), 115 (16), 105 (31), 91 (55), 77 (15), 55 (5)

SFC: (2*R*,3*S*)-**4bh**,  $t_R$  13.69 min (98.4%); (2*S*,3*R*)-**4bh**,  $t_R$  5.87 min (1.6%) (Chiralpak OD, 10% MeOH in CO<sub>2</sub>, 2.0 mL/min, 220 nm, 40 °C)

Data for 4bh':

<sup>1</sup>H NMR: (500 MHz, CDCl<sub>3</sub>)

Diagnostic signals: δ 4.43–4.37 (m, 1H, HC(2)), 3.84–3.72 (m, 2H, HC(5))

MS: (ES<sup>+</sup>, 70 eV)

326 (9, M<sup>+</sup>), 281 (62), 255 (15), 207 (100), 191 (12), 161 (15), 91 (30)

**Preparation of (2*R*,3*S*)-3-((2,6-Diisopropylphenyl)thio)-2-phenyltetrahydro-2*H*-pyran (**4bj**) and (*R*)-2-((*S*)-((2,6-Diisopropylphenyl)thio)(phenyl)methyl)tetrahydrofuran (**4bj'**) (Table 2, Entry 4)**

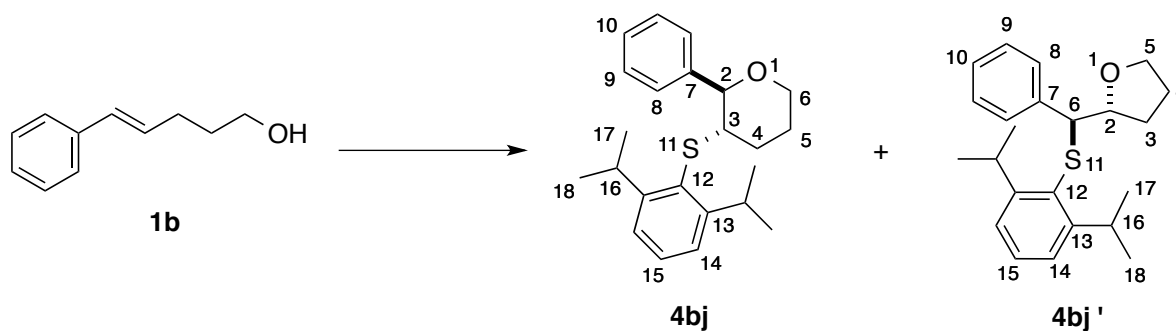

Following General Procedure 3, an oven-dried Schlenk flask was charged with **2j** (351 mg, 1.03 mmol, 1.03 equiv), catalyst (*R*)-**3c** (51.0 mg, 0.098 mmol, 0.098 equiv), **1b** (162 mg, 1.00 mmol), and CH<sub>2</sub>Cl<sub>2</sub> (5.0 mL). The mixture was cooled to 0 °C in an *i*-PrOH bath. MsOH (65 μL, 1.0 mmol, 1.0 equiv) was added via syringe and the mixture was allowed to stir for 48 h at 0 °C. The reaction was worked up following the general procedure. Purification by column chromatography (SiO<sub>2</sub>, 65 g, 35 mm Ø, hexane/MTBE, 60:1) afforded 310 mg (87%) of a 93:7 mixture of **4bj** and **4bj'** as a pale yellow oil. Partial separation of isomers was accomplished by column chromatography using high porosity silica gel (SiO<sub>2</sub>, 65 g, 35 mm Ø, hexane/MTBE, 80:1→5:1) yielding 271 mg of a 97:3 mixture of **4bj** and **4bj'** and 30 mg of a 60:40 mixture of **4bj** and **4bj'**.

Data for isomer mixture (4bj:4bj'= 97:3):

IR: (NaCl plate)

3054 (m), 3026 (m), 2960 (s), 2864 (s), 2718 (w), 2360 (w), 2333 (w), 1941 (w),

1866 (w), 1801 (w), 1573 (m), 1493 (m), 1454 (s), 1420 (m), 1381 (m), 1360 (m), 1325 (m), 1307 (m), 1260 (m), 1226 (w), 1178 (m), 1106 (s), 1079 (s), 1053 (m), 1028 (s), 969 (m), 943 (m), 905 (w), 883 (m), 820 (m), 801 (m), 773 (m), 754 (s)

HRMS: calcd for C<sub>23</sub>H<sub>31</sub>OS<sup>+</sup>: 355.2096, found: 355.2097

TLC: R<sub>f</sub> 0.44 **4bj** and **4bj'** and (hexanes/EtOAc, 15:1) [CAM]

Opt. Rot. :  $[\alpha]_{\text{D}}^{24} -9.7$  (c = 0.27, CHCl<sub>3</sub>)

Data for 4bj:

<sup>1</sup>H NMR: (500 MHz, CDCl<sub>3</sub>)

δ 7.45 (d, *J* = 7.9 Hz, 2H, HC(8)), 7.38 (t, *J* = 8.0 Hz, 2H, HC(9)), 7.36–7.32 (m, 1H, HC(10)), 7.26 (t, *J* = 7.4 Hz, 1H, HC(15)), 7.09 (d, *J* = 7.6 Hz, 2H, HC(14)), 4.25 (d, *J* = 10.1 Hz, 1H, HC(2)), 4.10–4.04 (m, 1H, HC(6)), 3.71–3.45 (m, 3H, HC(6), HC(16)), 3.0–2.91 (m, 1H, HC(3)), 1.95–1.85 (m, 1H, HC(4)), 1.72–1.60 (m, 3H, HC(4), and HC(5)), 1.12 (d, *J* = 6.9 Hz, 6H, HC(17)), 1.09 (br d, *J* = 6.5 Hz, 6H, HC(18))

<sup>13</sup>C NMR: (125 MHz, CDCl<sub>3</sub>)

153.8 (C(13)), 140.1 (C(7)), 129.1 (C(12)), 129.0 (C(15)), 128.3 (C(10)), 128.1 (C(9)), 127.4 (C(8)), 123.4 (C(14)), 84.3 (C(2)), 68.6 (C(6)), 51.9 (C(3)), 31.8 (C(4)), 31.3 (C(16)), 27.0 (C(5)), 24.6 (C(17)), 23.8 (C(18))

MS: (ES<sup>+</sup>, 70 eV)

311 (14), 283 (25), 263 (6), 247 (10), 205 (19), 192 (25), 177 (7), 161 (100), 149 (60), 135 (19), 115 (18), 105 (34), 91 (74), 77 (16), 55 (6)

SFC: (2*R*,3*S*)-**4bj**, *t*<sub>R</sub> 10.06 min (99.3%); (2*S*,3*R*)-**4bj**, *t*<sub>R</sub> 5.06 min (0.7%) (Chiralpak OD, 10% MeOH in CO<sub>2</sub>, 2.0 mL/min, 220 nm, 40 °C)

Data for 4bj':

<sup>1</sup>H NMR: (500 MHz, CDCl<sub>3</sub>)

Diagnostic signals: δ 4.44–4.36 (m, 1H, HC(2)), 3.88–3.72 (m, 2H, HC(5)), 3.70 (d, *J* = 6.7 Hz, 1H, HC(6)), 2.18–2.09 (m, 1H, H(C(alkyl))), 1.19 (d, *J* = 6.9 Hz, 6H, HC(17)), 0.98 (d, *J* = 6.8 Hz, HC(18))

MS: (ES<sup>+</sup>, 70 eV)

341 (9), 327 (7), 283 (7), 267 (9), 277 (7), 207 (100), 191 (10), 179 (10), 161 (49),

149 (13), 133 (7), 115 (18), 91 (80), 71 (13)

**Preparation of (*R*)-2-((Phenylthio)methyl)tetrahydrofuran (**4ca**) (Table 2, Entry 5)**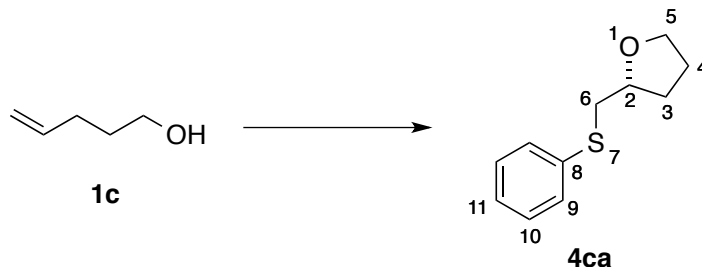

Since **4ca** is a known compound,<sup>16</sup> the thioetherification reaction was conducted on a 0.20 mmol scale: Following General Procedure 3, an oven-dried 6 dram vial was charged with the sulfenylating agent **2a** (56 mg, 0.22 mmol, 1.1 equiv), catalyst (*R*)-**3c** (11 mg, 0.021 mmol, 0.11 equiv), **1c** (17 mg, 0.20 mmol, 1.0 equiv), and CH<sub>2</sub>Cl<sub>2</sub> (1.0 mL). The vial was capped with a polypropylene open hole cap and cooled to 0 °C in an *i*-PrOH bath. After 15 min at this temperature, MsOH (13 μL, 0.20 mmol, 1.0 equiv) was added and the mixture was allowed to stir for 36 h. The reaction was worked up following the general procedure (the amounts of CH<sub>2</sub>Cl<sub>2</sub>, HCl and NaOH were proportionally decreased for the 0.20 mmol scale). Purification by chromatography (SiO<sub>2</sub>, 30 g, 20 mm Ø, hexane/EtOAc, 60:1) afforded **4ca** (36 mg, 83%) as a yellowish oil. The spectroscopic data match those published in the literature.<sup>16</sup>

**Data for 4ca:**

<sup>1</sup>H NMR: (500 MHz, CDCl<sub>3</sub>)

δ 7.37 (d, *J* = 8.0 Hz, 2H, HC(9)), 7.28 (t, *J* = 7.4 Hz, 2H, HC(10)), 7.17 (t, *J* = 7.3 Hz, 1H, HC(11)), 4.11–4.01 (m, 1H, HC(2)), 3.91 (dd, *J* = 15.0, 7.0 Hz, 1H, HC(5)), 3.77 (dd, *J* = 15.9, 7.3 Hz, 1H, HC(5)), 3.16 (dd, *J* = 13.0, 5.8 Hz, 1H, HC(6)), 2.97 (dd, *J* = 13.0, 6.8 Hz, 1H, HC(6)), 2.15–2.00 (m, 1H, HC(3)), 2.00–1.82 (m, 2H, HC(4)), 1.75–1.61 (m, 1H, HC(3)).

**SFC:** (*2R*)-**4ca**, *t*<sub>R</sub> 7.55 min (88.9%); (*2S*)-**4ca**, *t*<sub>R</sub> 6.05 min (11.1%) (Chiralpak AD, 4% MeOH in CO<sub>2</sub>, 2.0 mL/min, 220 nm, 40 °C)

**Preparation of (*R*)-2-(((2,6-Diisopropylphenyl)thio)methyl)tetrahydrofuran (**4cj**) (Table 2, Entry 6)**

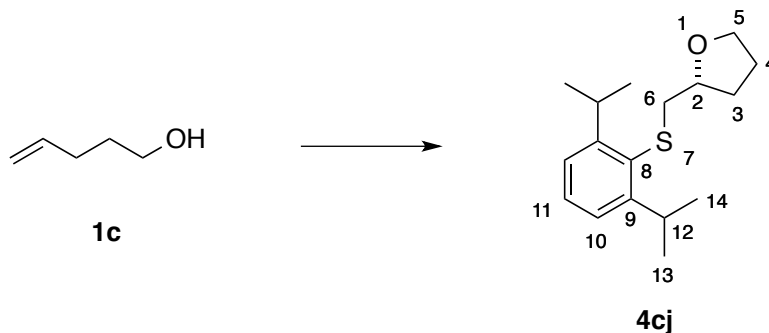

Following General Procedure 3, an oven-dried Schlenk flask was charged with **2j** (350 mg, 1.03 mmol, 1.03 equiv), catalyst (*R*)-**3c** (52.2 mg, 0.100 mmol, 0.100 equiv), **1c** (101  $\mu$ L, 86.1 mg, 1.00 mmol), and  $\text{CH}_2\text{Cl}_2$  (5.0 mL). The mixture was cooled to 0  $^\circ\text{C}$  in an *i*-PrOH bath. MsOH (65  $\mu$ L, 1.0 mmol, 1.0 equiv) was added via syringe and the mixture was allowed to stir for 36 h at 0  $^\circ\text{C}$ . The reaction was worked up following the general procedure. Purification by column chromatography ( $\text{SiO}_2$ , 65 g, 35 mm  $\varnothing$ , hexane/MTBE, 60:1) afforded **4cj** (261 mg, 94%) as a pale yellow oil. An analytically pure sample was obtained by Kugelrohr distillation.

Data for **4cj**:

bp: 140 $^\circ\text{C}$  (ABT), 0.3 mmHg

$^1\text{H}$  NMR: (500 MHz,  $\text{CDCl}_3$ )

$\delta$  7.30 (t,  $J = 7.7$  Hz, 1H, HC(11)), 7.15 (d,  $J = 7.7$  Hz, 2H, HC(10)), 4.03–3.93 (m, 3H, HC(12), HC(2)), 3.90 (dd,  $J = 15.6, 7.5$  Hz, 1H, HC(5)), 3.75 (dd,  $J = 15.5, 7.6$  Hz, 1H, HC(5)), 2.83 (dd,  $J = 12.4, 6.1$  Hz, 1H, HC(6)), 2.68 (dd,  $J = 12.4, 6.7$  Hz, 1H, HC(6)), 2.08–1.99 (m, 1H, HC(3)), 1.98–1.83 (m, 2H, HC(4)), 1.68–1.60 (m, 1H, HC(3)), 1.24 (d,  $J = 6.9$  Hz, 6H, HC(13)), 1.23 (d,  $J = 6.9$  Hz, 6H, HC(14))

$^{13}\text{C}$  NMR: (125 MHz,  $\text{CDCl}_3$ )

$\delta$  153.2 (C(9)), 131.5 (C(8)), 129.1 (C(11)), 123.6 (C(10)), 77.9 (C(2)), 68.2 (C(5)), 42.9 (C(6)), 31.5 (C(12)), 31.0 (C(3)), 25.8 (C(4)), 24.43 (C(13)), 24.40 (C(14))

IR: (NaCl plate)

3054 (m), 2961 (s), 2867 (s), 1574 (m), 1461 (s), 1420 (m), 1382 (m), 1361 (m), 1307 (m), 1246 (m), 1178 (m), 1100 (m), 1054 (s), 928 (m), 800 (s), 745 (m)

MS: ( $\text{ES}^+$ , 70 eV)

278 (80,  $\text{M}^+$ ), 219 (18), 192 (28), 177 (23), 161 (84), 149 (66), 135 (20), 115 (16),

105 (6), 91 (16), 71 (100)

HRMS: calcd for C<sub>17</sub>H<sub>27</sub>OS<sup>+</sup>: 279.1783, found: 279.1779TLC: R<sub>f</sub> 0.25 (hexanes/EtOAc, 30:1) [CAM]Opt. Rot.: [α]<sub>D</sub><sup>24</sup> -0.7 (c = 0.66, CHCl<sub>3</sub>)HPLC: (2*R*)-**4cj**, t<sub>R</sub> 13.47 min (98.6%); (2*S*)-**4cj**, t<sub>R</sub> 14.97 min (1.4%) ((*R,R*)-Whelk-O1, hexane:*i*-PrOH = 99:1, 0.4 mL/min, 220 nm, 0 °C)Analysis: C<sub>17</sub>H<sub>26</sub>OS (278.45)

Calcd: C, 73.33; H, 9.41;

Found: C, 73.13; H, 9.41;

**Preparation of (4*S*,5*R*)-5-(Methoxyoctan-4-yl)(phenyl)sulfane (4da) (Table 2, Entry 7)**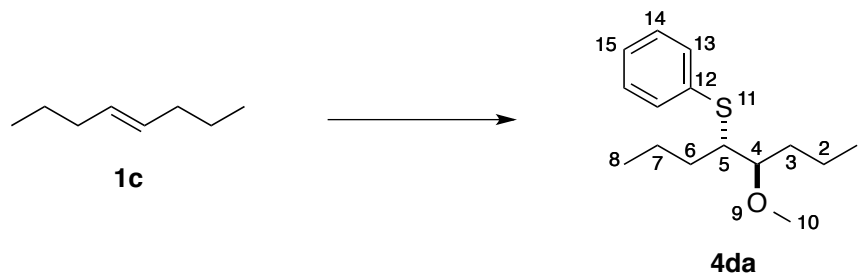

Since **4da** is a known compound,<sup>16</sup> the thioetherification reaction was conducted on a 0.20 mmol scale: Following General Procedure 3, an oven-dried 6 dram vial was charged with the sulfenylating agent **2a** (55.0 mg, 0.215 mmol, 1.10 equiv), catalyst (*R*)-**3c** (10.7 mg, 20.6 μmol, 0.105 equiv), **1d** (31.5 μL, 22.4 mg, 0.196 mmol), and CH<sub>2</sub>Cl<sub>2</sub> (1.0 mL). MeOH (9.7 μL, 0.24 mmol, 1.2 equiv) was added, the vial was capped with a polypropylene open hole cap and cooled to -20 °C in an *i*-PrOH bath. After 15 min at this temperature, MsOH (14.5 μL, 0.22 mmol, 1.1 equiv) was added and the mixture was allowed to stir for 48 h. The reaction was worked up following the general procedure (the amounts of CH<sub>2</sub>Cl<sub>2</sub>, HCl and NaOH were proportionally decreased for the 0.20 mmol scale). Purification by chromatography (SiO<sub>2</sub>, 30 g, 20 mm Ø, hexane/EtOAc, 100:1) afforded **4da** (39 mg, 77%) as a yellowish oil. The spectroscopic data match those published in the literature.<sup>16</sup>

Data for 4da:<sup>1</sup>H NMR: (500 MHz, CDCl<sub>3</sub>)

δ 7.42 (d, *J* = 7.9 Hz, 2H, HC(13)), 7.27 (t, *J* = 7.9 Hz, 2H, HC(14)), 7.20 (t, *J* = 7.7 Hz, 1H, HC(15)), 3.37 (s, 3H, HC(10)), 3.30 (dt, *J* = 8.2, 4.2 Hz, 1H, HC(4)), 3.20



(dt,  $J = 9.3, 3.9$  Hz, 1H, HC(5)), 1.74–1.24 (m, 8H, HC(2), HC(3), HC(6) and HC(7)), 0.92 (t,  $J = 7.3$  Hz, 3H, HC(1,8)), 0.89 (t,  $J = 7.3$  Hz, 3H, HC(8,1))

HPLC: (4*S*,5*R*)-**4da**,  $t_R$  24.08 min (97.4%); (4*R*,5*S*)-**4da**,  $t_R$  21.62 min (2.6%) (Chiralpak AD-RH, 50% MeCN in H<sub>2</sub>O, 1.0 mL/min, 220 nm, 40 °C)

**Preparation of (2,6-Diisopropylphenyl)((4*S*,5*R*)-5-methoxyoctan-4-yl)sulfane (**4dj**) (Table 2, Entry 8)**

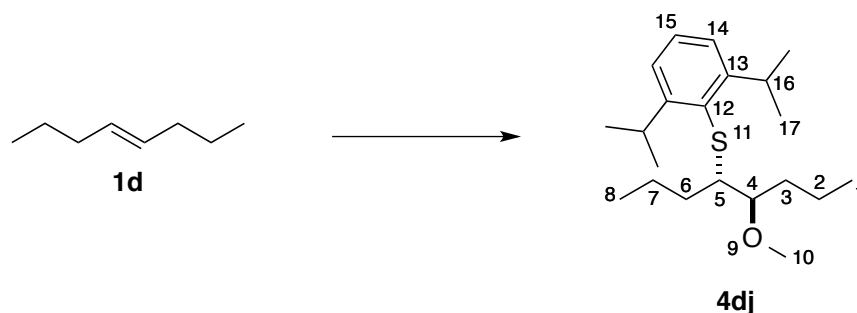

Following General Procedure 3, an oven-dried Schlenk flask was charged with **2j** (351 mg, 1.03 mmol, 1.03 equiv), catalyst (*R*)-**3c** (51.9 mg, 0.100 mmol, 0.100 equiv), substrate **1d** (157  $\mu$ L, 112 mg, 1.00 mmol), and CH<sub>2</sub>Cl<sub>2</sub> (5.0 mL). MeOH (50.0  $\mu$ L, 1.23 mmol, 1.23 equiv) was added and the mixture was cooled to 0 °C in an *i*-PrOH bath. MsOH (65  $\mu$ L, 1.00 mmol, 1.00 equiv) was added via syringe and the mixture was allowed to stir for 36 h at 0 °C. The reaction was worked up following the general procedure. Purification by column chromatography (SiO<sub>2</sub>, 65 g, 35 mm  $\varnothing$ , hexane/MTBE, 60:1) afforded pure **4dj** (285 mg, 85%) as a pale yellow oil.

Data for **4dj**:

<sup>1</sup>H NMR: (500 MHz, CDCl<sub>3</sub>)

$\delta$  7.29 (t,  $J = 7.7$  Hz, 1H, HC(15)), 7.14 (d,  $J = 7.7$  Hz, 2H, HC(14)), 4.01 (hept,  $J = 6.9$  Hz, 2H, HC(16)), 3.32 (s, 3H, HC(10)), 3.22 (ddd,  $J = 7.5, 5.4, 3.1$  Hz, 1H, HC(4)), 2.93 (ddd,  $J = 7.1, 5.7, 3.1$  Hz, 1H, HC(5)), 1.71–1.17 (m, 8H, HC(2), HC(3), HC(6) and HC(7)), 1.23 (d,  $J = 6.9$  Hz, 6H, HC(17)), 1.22 (d,  $J = 6.9$  Hz, 6H, HC(18)), 0.86 (t,  $J = 7.2$  Hz, 3H, HC(1,8)), 0.83 (t,  $J = 7.5$  Hz, 3H, HC(8,1))

<sup>13</sup>C NMR: (125 MHz, CDCl<sub>3</sub>)

$\delta$  153.6 (C(13)), 131.4 (C(12)), 128.8 (C(14)), 123.4 (C(15)), 82.4 (C(4)), 57.3 (C(10)), 53.6 (C(5)), 32.9 (C(3,6)), 32.5 (C(6,3)), 31.3 (C(16)), 24.5 (C(17) and

C(18)), 20.9 (C(2,7)), 19.3 (C(7,2)), 14.2 (C(1,8)), 14.0 (C(8,1))

**IR:** 3054 (m), 2959 (s), 2870 (s), 2816 (m), 1573 (m), 1462 (s), 1420 (w), 1381 (m), 1361 (m), 1302 (w), 1244 (w), 1224 (w), 1178 (m), 1095 (s), 1053 (m), 1025 (m), 963 (w), 928 (w), 799 (m), 744 (m)

**MS:** (ES<sup>+</sup>, 70 eV)  
336 (20, M<sup>+</sup>), 281 (5), 249 (100), 207 (13), 194 (5), 151 (16), 87 (5)

**HRMS:** calcd for C<sub>21</sub>H<sub>37</sub>OS<sup>+</sup>: 337.2565, found: 337.2567

**TLC:** R<sub>f</sub> 0.53 (hexanes/EtOAc, 30:1) [CAM]

**Opt. Rot.:** [α]<sub>D</sub><sup>24</sup> -7.4 (c = 0.36, CHCl<sub>3</sub>)

The enantiomeric purity of product **4dj** was determined after its oxidation to the sulfone (see below)

### Preparation of ((4*S*,5*R*)-5-Methoxyoctan-4-yl)(2,6-diisopropylphenyl)sulfone (**S23**)

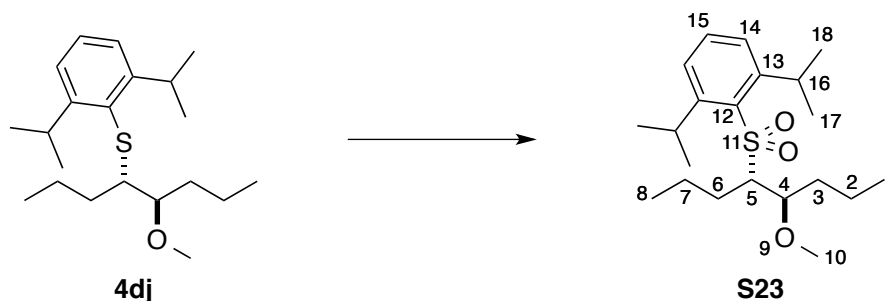

A round-bottom flask equipped with a magnetic stir bar was charged with **4dj** (36 mg, 0.11 mmol) and CH<sub>2</sub>Cl<sub>2</sub> (2.5 mL). At room temperature, *m*-Chloroperbenzoic acid (70–75%, 74 mg, 2.8–3.0 equiv) was added in three portions and the reaction mixture was stirred at room temperature for 3 h. TLC monitoring indicated full conversion and the reaction was quenched by the addition of a mixture of saturated aqueous Na<sub>2</sub>S<sub>2</sub>O<sub>3</sub> and H<sub>2</sub>O (4:1, 5.0 mL). The quenched mixture was poured into a separatory funnel, the flask was rinsed with CH<sub>2</sub>Cl<sub>2</sub> (5.0 mL) and the layers were separated. The aqueous phase was extracted with CH<sub>2</sub>Cl<sub>2</sub> (5.0 mL) and the combined organic layers were washed with aqueous NaOH (1.0 M, 2 × 5.0 mL). After phase separation, the alkaline layer was extracted with CH<sub>2</sub>Cl<sub>2</sub> (2 × 5.0 mL) and the combined organic layers were dried over MgSO<sub>4</sub>. The solvent was removed in vacuo (20–23 °C, 20 mmHg) and the crude product was purified by column chromatography (SiO<sub>2</sub>, 6 g, 10 mm Ø, hexane/EtOAc, 20:1) affording 33 mg (84%) of pure **S23** as an off-white solid.

Data for S23:<sup>1</sup>H NMR: (500 MHz, CDCl<sub>3</sub>)

δ 7.49 (t, *J* = 7.8 Hz, 1H, HC(15)), 7.35 (d, *J* = 7.8 Hz, 2H, HC(14)), 4.18 (m, 2H, HC(16)), 4.02 (ddd, *J* = 7.7, 5.7, 1.9 Hz, 1H, HC(5)), 3.47 (s, 3H, HC(10)), 3.04 (ddd, *J* = 6.7, 5.0, 1.9 Hz, 1H, HC(4)), 2.00–1.71 (m, 3H, H(C-alkyl)), 1.47–1.21 (m, 4H, H(C-alkyl)), 1.29 (d, *J* = 7.4 Hz, 6H, HC(17)), 1.27 (d, *J* = 7.4 Hz, 6H, HC(18)), 1.19–1.05 (m, 1H, H(C-alkyl)), 0.93 (t, *J* = 7.1 Hz, 3H, HC(1)), 0.78 (t, *J* = 7.3 Hz, 3H, HC(8))

<sup>13</sup>C NMR: (125 MHz, CDCl<sub>3</sub>)

151.1 (C(13)), 135.3 (C(12)), 132.8 (C(15)), 126.1 (C(14)), 77.1 (C(4)), 68.7 (C(5)), 58.7 (C(10)), 36.6 (C(alkyl)), 29.6 (C(alkyl)), 26.2 (C(alkyl)), 25.3 (br, C(17)), 24.7 (br, C(18)), 21.9 (C(2,7)), 19.2 (C(7,2)), 14.0 (C(1,8)), 13.9 (C(8,1))

MS: (ES<sup>+</sup>, 70 eV)

336 (6), 319 (70), 293 (7), 281 (17), 271 (15), 225 (100), 209 (28), 193 (34), 160 (17), 145 (42), 131 (10), 111 (11), 87 (36), 69 (34), 55 (15)

HRMS: calcd for C<sub>21</sub>H<sub>37</sub>O<sub>3</sub>S<sup>+</sup>: 369.2463, found: 369.2460TLC: *R*<sub>f</sub> 0.43 (hexanes/EtOAc, 15:1) [CAM]HPLC: (4*S*,5*R*)-**S21**, *t*<sub>R</sub> 33.36 min (99.2%); (4*R*,5*S*)-**S21**, *t*<sub>R</sub> 28.64 min (0.8%) (Chiralpak AD-RH, 50% MeCN in H<sub>2</sub>O, 0.5 mL/min, 220 nm, 40 °C)**Preparation of (*R*)-(2-Methoxyoctyl)(phenyl)sulfane (4ea) and (*S*)-(1-methoxyoctan-2-yl)-(phenyl)sulfane (4ea') (Table 2, Entry 9)**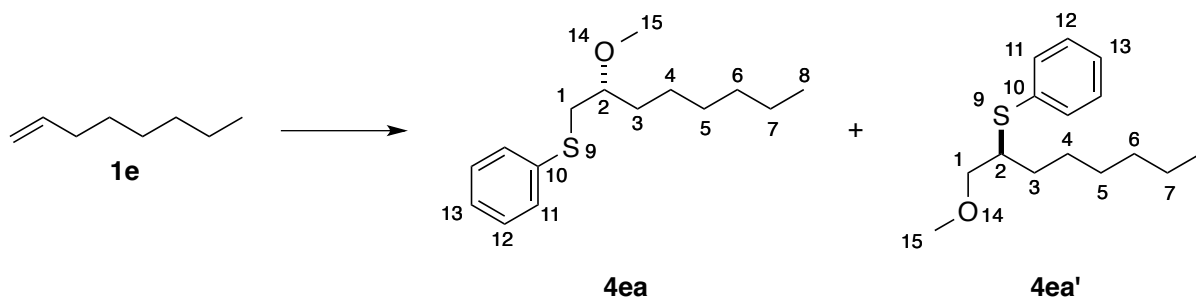

Since **4ea** is a known compound,<sup>16</sup> the thioetherification reaction was conducted on a 0.20 mmol scale: Following General Procedure 3, an oven-dried 6 dram vial was charged with the sulfenylating agent **2a** (53.6 mg, 0.210 mmol, 1.05 equiv), catalyst (*R*)-**3c** (10.8 mg, 20.7 μmol, 0.106 equiv), **1e** (31.5 μL, 22.4 mg, 0.196 mmol), and CH<sub>2</sub>Cl<sub>2</sub> (1.0 mL). MeOH

(9.7  $\mu\text{L}$ , 0.24 mmol, 1.2 equiv) was added, the vial was capped with a polypropylene open hole cap and MsOH (14.5  $\mu\text{L}$ , 0.22 mmol, 1.1 equiv) was added at room temperature. The reaction was stirred at room temperature for 24 h and worked up following the general procedure (the amounts of  $\text{CH}_2\text{Cl}_2$ , HCl and NaOH were proportionally decreased for the 0.20 mmol scale). Purification by chromatography ( $\text{SiO}_2$ , 30 g, 20 mm  $\varnothing$ , hexane/EtOAc, 100:1) afforded 38 mg (75%) of an inseparable 82:18 mixture of **4ea** and **4ea'** as a yellowish oil. The spectroscopic data match those published in the literature.<sup>16</sup>

Data for **4ea**:

$^1\text{H}$  NMR: (500 MHz,  $\text{CDCl}_3$ )

$\delta$  7.37 (d,  $J = 8.2$  Hz, 2H, HC(11)), 7.28 (t,  $J = 8.0$  Hz, 2H, HC(12)), 7.18 (t,  $J = 7.6$  Hz, 1H, HC(13)), 3.36 (s, 3H, HC(15)), 3.37–3.32 (m, 1H, HC(2)), 3.11 (dd,  $J = 13.1, 5.6$  Hz, 1H, HC(1)), 2.99 (dd,  $J = 13.1, 6.1$  Hz, 1H, HC(1)), 1.69–1.52 (m, 2H, HC(3)), 1.49–1.16 (m, 8H, HC(4), HC(5), HC(6), HC(7)), 0.88 (t,  $J = 7.1$  Hz, 3H, HC(8))

HPLC: (*R*)-**4ea**,  $t_{\text{R}}$  5.02 min (87.8%); (*S*)-**4ea'**,  $t_{\text{R}}$  5.36 min (12.2%) (Chiralpak AD-H, hexane:*i*-PrOH = 99:1, 0.8 mL/min, 220 nm, 25  $^\circ\text{C}$ )

Data for **4ea'**:

$^1\text{H}$  NMR: (500 MHz,  $\text{CDCl}_3$ )

$\delta$  7.42 (d,  $J = 8.1$  Hz, 2H, HC(11)), 7.33–7.25 (2H, HC(12)), 7.22 (t,  $J = 7.3$  Hz, 1H, HC(13)), 3.48 (dd,  $J = 9.8, 5.1$  Hz, 1H, HC(1)), 3.40 (dd,  $J = 9.8, 7.3$  Hz, 1H, HC(1)), 3.33 (s, 3H, HC(15)), 3.25–3.18 (m, 1H, HC(2)), 1.88–1.72 (m, 1H, HC(3)), 1.68–1.52 (m, 1H, HC(3)), 1.52–1.14 (m, 8H, HC(4), HC(5), HC(6), HC(7)), 0.88 (t,  $J = 7.1$  Hz, 3H, HC(8))

**Preparation of (*R*)-(2,6-Diisopropylphenyl)(2-methoxyoctyl)sulfane (**4ej**) and (*S*)-(2,6-Diisopropylphenyl)(1-methoxyoctan-2-yl)sulfane (**4ej'**) (Table 2, Entry 10)**

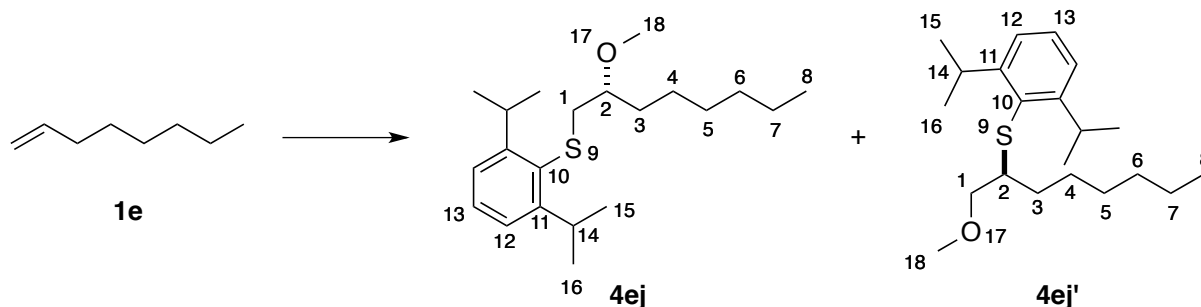

Following General Procedure 3, an oven-dried Schlenk flask was charged with **2j** (344 mg, 1.01 mmol, 1.01 equiv), catalyst (*R*)-**3c** (51.3 mg, 0.099 mmol, 0.099 equiv), substrate **1e** (157  $\mu$ L, 112 mg, 1.00 mmol), and  $\text{CH}_2\text{Cl}_2$  (5.0 mL). MeOH (50.0  $\mu$ L, 1.23 mmol, 1.23 equiv) was added, followed by the addition of MsOH (48  $\mu$ L, 0.75 mmol, 0.75 equiv) and the mixture was allowed to stir for 24 h at room temperature. The reaction was worked up following the general procedure. Purification by column chromatography ( $\text{SiO}_2$ , 65 g, 35 mm  $\varnothing$ , hexane/MTBE, 60:1) afforded 284 mg (84%) of an inseparable 79:21 mixture of **4ej'** and **4ej** as yellowish oil.

Data for isomer mixture:

bp: 140  $^\circ\text{C}$  (ABT), 0.3 mmHg

IR: 3055 (m), 2960 (s), 2926 (s), 2862 (s), 2821 (m), 1574 (m), 1461 (s), 1420 (m), 1381 (m), 1361 (m), 1338 (w), 1307 (w), 1246 (w), 1178 (m), 1097 (s), 1053 (m), 929 (w), 800 (m), 744 (m)

HRMS: calcd for  $\text{C}_{21}\text{H}_{37}\text{OS}^+$ : 337.2565, found: 337.2565

TLC:  $R_f$  0.44, **4ej'**; 0.47, **4ej** (hexanes/EtOAc, 30:1) [CAM]

Opt. Rot.:  $[\alpha]_D^{24}$  11.0 (c = 0.80,  $\text{CHCl}_3$ )

Data for **4ej**:

$^1\text{H}$  NMR: (500 MHz,  $\text{CDCl}_3$ )

$\delta$  7.32 (t,  $J = 7.7$  Hz, 1H, HC(13)), 7.18 (d,  $J = 7.6$  Hz, 2H, HC(12)), 3.99 (hept,  $J = 7.0$  Hz, 2H, HC(14)), 3.36–3.31 (m, 1H, HC(2)), 3.35 (s, 3H, HC(18)), 2.82 (dd,  $J = 12.5, 5.5$  Hz, 1H, HC(1)), 2.73 (dd,  $J = 12.4, 6.0$  Hz, 1H, HC(1)), 1.71–1.46 (m, 2H,

HC(3)), 1.42–1.17 (m, 8H, HC(4), HC(5), HC(6), HC(7)), 1.27 (d,  $J = 6.8$  Hz, 12H, HC(15), HC(16)), 0.91 (t,  $J = 7.2$  Hz, 3H, HC(8))

$^{13}\text{C}$  NMR: (125 MHz,  $\text{CDCl}_3$ )

$\delta$  153.1 (C(11)), 132.1 (C(10)), 129.0 (C(13)), 123.6 (C(12)), 80.4 (C(2)), 56.8 (C(18)), 41.6 (C(1)), 33.4 (C(alkyl)), 31.8 (C(alkyl)), 31.5 (C(14)), 29.3 (C(alkyl)), 25.2 (C(alkyl)), 24.5 (C(15)), 24.4 (C(16)), 22.6 (C(alkyl)), 14.1 (C(8))

MS: ( $\text{ES}^+$ , 70 eV)

336 (83,  $\text{M}^+$ ), 208 (31), 192 (31), 177 (18), 161 (30), 149 (55), 129 (100), 115 (9), 97 (90), 69 (12), 55 (31)

HPLC: (2*R*)-**4ej**,  $t_{\text{R}}$  61.45 min (98.6%); (2*S*)-**4ej**,  $t_{\text{R}}$  56.39 min (1.4%) (Chiralpak AD-RH, 50% MeCN in  $\text{H}_2\text{O}$ , 0.5 mL/min, 220 nm, 40 °C)

Data for **4ej**':

$^1\text{H}$  NMR: (500 MHz,  $\text{CDCl}_3$ )

$\delta$  7.33 (t,  $J = 7.8$  Hz, 1H, HC(13)), 7.18 (d,  $J = 7.6$  Hz, 2H, HC(12)), 3.99 (hept,  $J = 7.0$  Hz, 2H, HC(14)), 3.38 (dd,  $J = 9.6, 7.1$  Hz, 1H, HC(1)), 3.36–3.29 (m, 1H, HC(1)), 3.29 (s, 3H, HC(18)), 2.92–2.86 (m, 1H, HC(2)), 1.86–1.78 (m, 1H, HC(3)), 1.70–1.48 (m, 1H, HC(3)), 1.42–1.21 (m, 8H, HC(4), HC(5), HC(6), HC(7)), 1.23 (d,  $J = 7.0$  Hz, 12H, HC(15), HC(16)), 0.91 (t,  $J = 7.2$  Hz, 3H, HC(8))

$^{13}\text{C}$  NMR: (125 MHz,  $\text{CDCl}_3$ )

$\delta$  153.7 (C(11)), 130.5 (C(10)), 129.0 (C(13)), 123.5 (C(12)), 74.5 (C(1)), 58.7 (C(18)), 50.2 (C(2)), 31.9 (C(alkyl)), 31.7 (C(alkyl)), 31.4 (C(alkyl)), 26.8 (C(alkyl)), 24.7 (C(alkyl)), 24.1 (C(alkyl)), 22.6 (C(alkyl)), 14.1 (C(8))

MS: ( $\text{ES}^+$ , 70 eV)

336 (42,  $\text{M}^+$ ), 291 (100), 207 (16), 194 (14), 179 (8), 161 (14), 151 (20), 135 (5), 123 (5), 69 (7), 55 (4)

**Preparation of (5*S*,6*R*)-5-((2,6-Diisopropylphenyl)thio)-6-phenyl-1-tosylpiperidin-2-one (4*fj*) and (*R*)-5-((*S*)-((2,6-Diisopropylphenyl)thio)(phenyl)methyl)dihydrofuran-2(3*H*)-one (4*fj'*) (Table 2, Entry 12)**

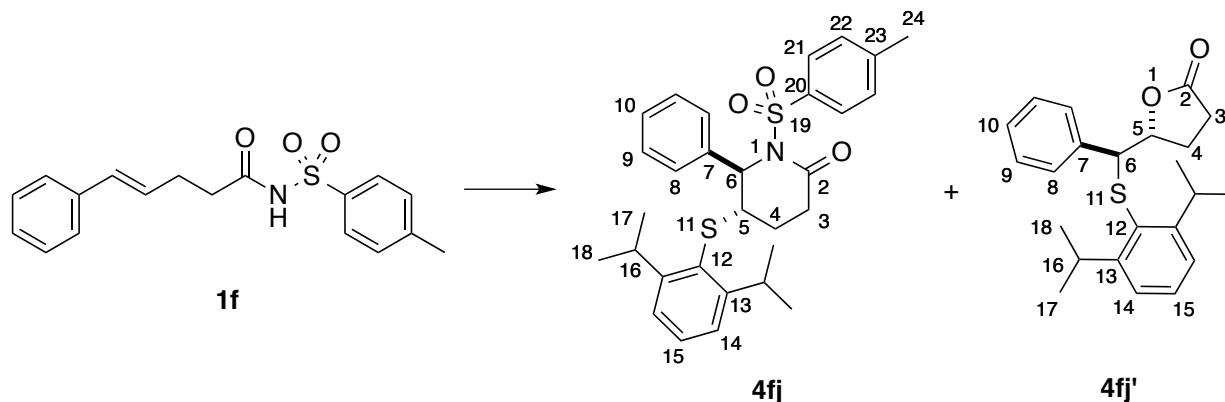

Following General Procedure 3, an oven-dried Schlenk flask was charged with **2j** (352 mg, 1.04 mmol, 1.04 equiv), catalyst (*R*)-**3c** (54.3 mg, 0.104 mmol, 0.104 equiv), **1f**<sup>15</sup> (329 mg, 1.00 mmol), and CH<sub>2</sub>Cl<sub>2</sub> (5.0 mL). MsOH (32 μL, 0.50 mmol, 0.50 equiv)<sup>15</sup> was added via syringe and the mixture was allowed to stir for 24 h at room temperature. The mixture was quenched by the addition of Et<sub>3</sub>N (0.20 mL) and was poured into saturated aqueous NaHCO<sub>3</sub> (10 mL) in a separatory funnel. CH<sub>2</sub>Cl<sub>2</sub> (20 mL) was added and the layers were thoroughly mixed. The phases were separated and the aqueous layer was extracted with CH<sub>2</sub>Cl<sub>2</sub> (2 × 20 mL). The combined organic layers were dried over MgSO<sub>4</sub>, filtered through glass wool and concentrated in vacuo (20–23 °C, 20 mmHg). Purification by column chromatography (SiO<sub>2</sub>, 65 g, 35 mm Ø, hexane/EtOAc, 30:1→5:1) afforded 441 mg of a 89:11 mixture of **4fj** and **4fj'** as a white solid. Separation of the mixture was accomplished by column chromatography using C-18 reversed phase silica gel (C-18 reversed-phase silica gel, 30 × 160 mm Ø, MeOH/water, 80:20→93:7) yielding 375 mg (72%) of **4fj** as a white solid and 33 mg (9%) of **4fj'** as a white solid, respectively. Analytically pure **4fj** was obtained by recrystallization from hexane/Et<sub>2</sub>O.

Data for **4fj**:

mp: 128–131 °C (hexane/Et<sub>2</sub>O)

<sup>1</sup>H NMR: (500 MHz, CDCl<sub>3</sub>)

δ 7.77 (d, *J* = 8.1 Hz, 2H, HC(21)), 7.36 (t, *J* = 7.7 Hz, 1H, HC(aryl)), 7.33–7.26 (m, 3H, HC(aryl)), 7.25–7.19 (m, 4H, HC(aryl)), 7.05 (d, *J* = 7.5 Hz, 2H, HC(14)), 5.85 (br s, 1H, HC(6)), 3.85 (hept, *J* = 7.0 Hz, 2H, HC(16)), 3.22 (m, 1H, HC(5)), 2.84 (ddd, *J* = 18.6, 11.0, 7.6 Hz, 1H, HC(3)), 2.52 (ddd, *J* = 18.6, 6.9, 2.3 Hz, 1H,

HC(3)), 2.41 (s, 3H, HC(24)), 1.91 (dddd,  $J = 14.5, 10.7, 6.9, 3.5$  Hz, 1H, HC(4)), 1.71–1.64 (m, 1H, HC(4)), 1.26 (d,  $J = 6.9$  Hz, 6H, HC(17)), 1.23 (d,  $J = 6.9$  Hz, 6H, HC(18))

$^{13}\text{C}$  NMR: (125 MHz,  $\text{CDCl}_3$ )

$\delta$  169.6 (C(2)), 153.5 (C(13)), 144.7 (C(20)), 139.9 (C(7)), 135.7 (C(23)), 129.8 (C(15)), 129.6 (C(18)), 129.4 (C(12)), 128.8 (2  $\times$ , C(9), C(22)), 128.0 (C(10)), 126.1 (C(8)), 124.1 (C(14)), 65.1 (C(6)), 52.4 (C(5)), 31.8 (C(16)), 30.1 (C(3)), 24.6 (C(18)), 24.5 (C(17)), 21.7 (C(24)), 20.8 (C(4))

IR: (neat)

2960 (m), 2928 (w), 1695 (s), 1596 (w), 1495 (m), 1449 (m), 1351 (s), 1283 (m), 1253 (m), 1166 (s), 1149 (s), 1125 (s), 1089 (s), 1026 (m), 966 (m), 893 (w), 823 (m), 810 (s), 780 (m), 748 (m)

MS: (ESI)

544 (15, M+Na), 522.2 (100, M+H), 328 (70)

HRMS: calcd for  $\text{C}_{30}\text{H}_{36}\text{NO}_3\text{S}^+$ : 522.2137, found: 522.2132

TLC: normal phase:  $R_f$  0.25 (hexanes/EtOAc, 5:1) [CAM]

reversed phase:  $R_f$  0.23 (MeOH/ $\text{H}_2\text{O}$ , 9:1) [CAM]

Opt. Rot.:  $[\alpha]_{\text{D}}^{24} -16.5$  ( $c = 0.39$ ,  $\text{CHCl}_3$ )

HPLC: Prior to recrystallization: (5*S*,6*R*)-**4fj**,  $t_{\text{R}}$  18.24 min (94.3%); (5*R*,6*S*)-**4fj**,  $t_{\text{R}}$  31.53 min (5.7%) (Chiralcel AD-H, hexane:*i*-PrOH, 95:5, 0.8 mL/min, 220 nm, 25 °C)

Analysis:  $\text{C}_{30}\text{H}_{35}\text{NO}_3\text{S}$  (521.73)

Calcd: C, 69.06; H, 6.76; N, 2.68;

Found: C, 69.13; H, 6.89; N, 2.67

Data for **4fj'**:

$^1\text{H}$  NMR: (500 MHz,  $\text{CDCl}_3$ )

$\delta$  7.32–7.21 (m, 6H, HC(aryl)), 7.13 (d,  $J = 7.7$  Hz, 2H, HC(14)), 4.85 (m, 1H, HC(5)), 3.89–3.75 (m, 2H, HC(16)), 3.79 (d,  $J = 5.0$  Hz, 1H, HC(6)), 2.44–2.29 (m, 2H, HC(alkyl)), 2.20–2.09 (m, 1H, HC(alkyl)), 2.05–1.98 (m, 1H, HC(alkyl)), 1.20 (d,  $J = 6.9$  Hz, 6H, HC(17)), 1.05 (d,  $J = 6.9$  Hz, 6H, HC(18))



$^{13}\text{C}$  NMR: (125 MHz,  $\text{CDCl}_3$ )

$\delta$  176.4 (C(2)), 153.9 (C(13)), 136.9 (C(7)), 129.7 (C(aryl)), 129.4 (C(12)), 128.8 (C(aryl)), 128.5 (C(aryl)), 128.0 (C(aryl)), 123.8 (C(14)), 80.9 (C(5)), 59.4 (C(6)), 31.5 (C(16)), 28.4 (C(alkyl)), 25.9 (C(alkyl)), 24.3 (br, C(alkyl))

MS: (ESI)

391 (44, M+Na), 386 (50), 369 (100, M+H), 351 (6), 327 (6), 309 (12), 204 (15), 177 (15)

HRMS: calcd for  $\text{C}_{23}\text{H}_{29}\text{O}_2\text{S}^+$ : 369.1888, found: 369.1884

TLC: normal phase:  $R_f$  0.25 (hexanes/EtOAc, 5:1) [CAM]

reversed phase:  $R_f$  0.35 (MeOH/ $\text{H}_2\text{O}$ , 9:1) [CAM]

**Calculations of the Transition States (Figure 5)**

- (a) Optimized structures and energies of **H-TS-major1, H-TS-major2, H-TS-minor1, H-TS-minor-2** S74
- (b) Cartesian coordinates of **H-TS-major1, H-TS-major2, H-TS-minor1, H-TS-minor-2** S?
- (c) Optimized structures and energies of **Me-TS-major1, Me-TS-major2, Me-TS-minor1, Me-TS-minor-2** S?
- (d) Cartesian coordinates of **Me-TS-major1, Me-TS-major2, Me-TS-minor1, Me-TS-minor-2** S?
- (e) Distorsion Interaction and NBO analysis for the diastereomeric TSs S?

All geometry optimizations and frequency calculations were performed in Gaussian 09<sup>24</sup> at the B3LYP/6-31G\* level in gas phase. The transition states were characterized by one imaginary frequency. Figures for the transition state structures are prepared with CYLview. The Cartesian coordinates (Å), total SCF energies, enthalpies at 253.15K (-20°C), and Gibbs free energies at 253.15K (-20°C) for the optimized structures are given below. Donor-acceptor orbital interactions and the corresponding second order perturbation stabilization energies were calculated using Natural Bond Orbital (NBO)<sup>25</sup> method at B3LYP/6-31G\* level of theory. Data given in parentheses have been computed using CPCM solvent model (UFF radii, CH<sub>2</sub>Cl<sub>2</sub>). Solvation free energy corrections were computed by singlet point CPCM<sup>26,27</sup> calculations on gas-phase optimized geometries, UFF atomic radii were used and dichloromethane was specified as the solvent.

**Optimized Structures and Energies for Transition States with the Phenylsulfenyl Group  
(R = H) H-TS-major1, H-TS-major2, H-TS-minor1, H-TS-minor-2**

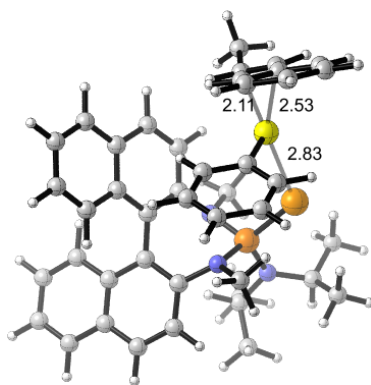**H-TS-major1** $\Delta\Delta G$  (253K) = 0.0 (0.0) kcal/mol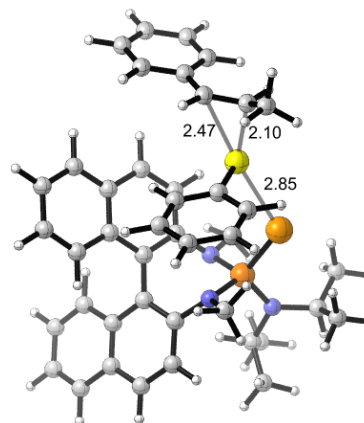**H-TS-major2** $\Delta\Delta G$  (253K) = 1.5 (1.1) kcal/mol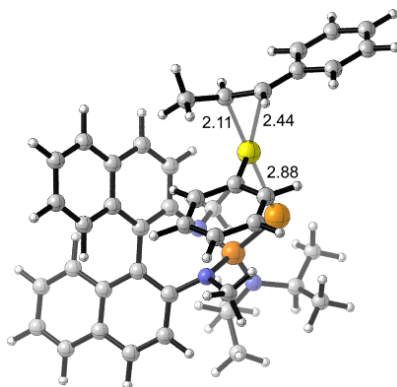**H-TS-minor1** $\Delta\Delta G$  (253K) = 1.7 (1.4) kcal/mol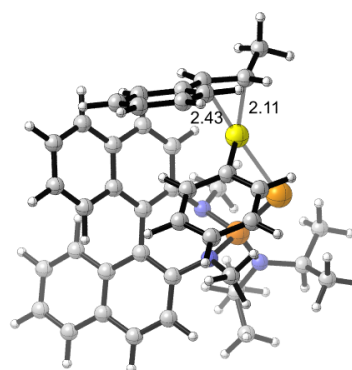**H-TS-minor2** $\Delta\Delta G$  (253K) = 3.0 (2.3) kcal/mol

Data given in parentheses have been computed using CPCM solvent model (UFF radii, CH<sub>2</sub>Cl<sub>2</sub>)

**Cartesian Coordinates of H-TS-major2, H-TS-major1, H-TS-minor2, H-TS-minor1****H-TS-major1**

|    |             |             |             |
|----|-------------|-------------|-------------|
| S  | 0.47445255  | 0.48905109  | 0.00000000  |
| N  | 4.59084455  | 0.68854909  | -2.06317900 |
| N  | 5.01284355  | 0.59938209  | 0.55870800  |
| N  | 5.75780055  | -1.58937591 | -0.81348100 |
| C  | 0.49361455  | 1.25219109  | -1.61405800 |
| C  | 1.06543755  | 2.52082409  | -1.78757700 |
| H  | 1.50251955  | 3.04199809  | -0.94166500 |
| C  | 1.08851755  | 3.10015609  | -3.05655800 |
| H  | 1.53500555  | 4.08177609  | -3.18674500 |
| C  | 0.55602055  | 2.41294109  | -4.15115600 |
| H  | 0.57731155  | 2.86567709  | -5.13849300 |
| C  | 0.00053155  | 1.14186909  | -3.97895300 |
| H  | -0.40850345 | 0.60546809  | -4.83026000 |
| C  | -0.03380545 | 0.55841009  | -2.71326600 |
| H  | -0.46101545 | -0.42928591 | -2.57260600 |
| C  | 5.66750455  | 1.62622809  | -2.21605100 |
| C  | 5.83364055  | 2.64570809  | -1.28508800 |
| C  | 7.01175755  | 3.47194009  | -1.35632500 |
| C  | 7.89804255  | 3.33954509  | -2.47496700 |
| C  | 7.60347355  | 2.37521109  | -3.47347900 |
| H  | 8.25569755  | 2.29626709  | -4.33944900 |
| C  | 6.53543955  | 1.52531509  | -3.33792000 |
| H  | 6.34929655  | 0.77143609  | -4.09383500 |
| C  | 4.42620955  | 1.90759109  | 0.65212000  |
| C  | 4.79186755  | 2.89733909  | -0.25398400 |
| C  | 4.12952655  | 4.17630809  | -0.19926800 |
| C  | 3.23530355  | 4.46518509  | 0.88377000  |
| C  | 2.98081355  | 3.45463709  | 1.84565400  |
| H  | 2.32854455  | 3.67959009  | 2.68630000  |
| C  | 3.52644655  | 2.20242209  | 1.71394700  |
| H  | 3.28288855  | 1.43759109  | 2.44113400  |
| C  | 5.15134355  | -0.13075191 | 1.83664000  |
| H  | 5.57849355  | 0.54647409  | 2.57912600  |
| H  | 5.82577055  | -0.97231891 | 1.69657000  |
| H  | 4.18976155  | -0.51950191 | 2.19537400  |
| C  | 3.86515555  | 0.29893809  | -3.28824900 |
| H  | 3.60428755  | 1.20622209  | -3.83743200 |
| H  | 2.95214255  | -0.22084691 | -2.99887200 |
| H  | 4.45119755  | -0.36243991 | -3.93878400 |
| C  | 5.53209055  | -3.07681791 | -0.89044800 |
| H  | 6.54337255  | -3.47272791 | -1.00477400 |
| C  | 7.18420155  | -1.14457691 | -1.00629000 |
| H  | 7.17161155  | -0.05367391 | -0.96638000 |
| C  | -0.86689545 | 1.78747109  | 0.99106400  |
| C  | -1.94643945 | 1.07010909  | 0.42618400  |
| Se | 2.59963055  | -1.29089491 | -0.57868300 |
| P  | 4.57394955  | -0.39909391 | -0.75455100 |
| C  | 7.73982955  | -1.56092091 | -2.37687900 |
| H  | 8.70788255  | -1.07579691 | -2.54100700 |
| H  | 7.90019255  | -2.64225191 | -2.44517100 |
| H  | 7.07194055  | -1.26271991 | -3.18865700 |
| C  | 8.10845655  | -1.62421191 | 0.12396700  |
| H  | 8.15794655  | -2.71660391 | 0.18382700  |
| H  | 9.12497255  | -1.26303791 | -0.06639200 |

|                                               |             |             |              |
|-----------------------------------------------|-------------|-------------|--------------|
| H                                             | 7.79893855  | -1.23887091 | 1.09857700   |
| C                                             | 4.98195555  | -3.67722691 | 0.41085600   |
| H                                             | 5.62559555  | -3.42498191 | 1.26006000   |
| H                                             | 3.96984855  | -3.32576291 | 0.62285800   |
| H                                             | 4.95367855  | -4.76919891 | 0.32410100   |
| C                                             | 4.75523055  | -3.52502091 | -2.13739800  |
| H                                             | 5.22314955  | -3.13868891 | -3.04889800  |
| H                                             | 4.75565755  | -4.61921491 | -2.19449000  |
| H                                             | 3.71695355  | -3.18667691 | -2.10796300  |
| C                                             | 2.60956555  | 5.73888709  | 0.96191100   |
| C                                             | 4.30792455  | 5.18038509  | -1.19393500  |
| C                                             | 3.67039055  | 6.39848009  | -1.10174800  |
| C                                             | 2.82230955  | 6.69105709  | -0.00752800  |
| C                                             | 7.35432955  | 4.41100009  | -0.34402200  |
| C                                             | 9.05168555  | 4.16320409  | -2.55925500  |
| C                                             | 9.34409355  | 5.07078609  | -1.56755300  |
| H                                             | 10.23250355 | 5.69158309  | -1.63683100  |
| C                                             | 8.48967355  | 5.18462509  | -0.44618500  |
| H                                             | 9.70692455  | 4.05361809  | -3.41979300  |
| H                                             | 8.73443555  | 5.88645909  | 0.34601600   |
| H                                             | 6.71848755  | 4.50639809  | 0.52866300   |
| H                                             | 3.82399755  | 7.14432409  | -1.87660800  |
| H                                             | 4.95321055  | 4.97916809  | -2.04069900  |
| H                                             | 2.33880255  | 7.66131809  | 0.05952300   |
| H                                             | 1.95257455  | 5.94429209  | 1.80381000   |
| H                                             | -0.64212045 | 2.76901509  | 0.57992500   |
| C                                             | -0.54950345 | 1.62533809  | 2.46136200   |
| H                                             | -1.23605445 | 2.24296609  | 3.05320100   |
| H                                             | -0.66743645 | 0.58654409  | 2.78736800   |
| H                                             | 0.47270755  | 1.94567309  | 2.67462200   |
| C                                             | -2.74863445 | 1.40905409  | -0.71652400  |
| C                                             | -3.72072145 | 0.47528009  | -1.15041100  |
| C                                             | -2.64636445 | 2.64519209  | -1.39855400  |
| C                                             | -4.55421945 | 0.76273109  | -2.22276300  |
| H                                             | -3.81134245 | -0.47480691 | -0.63023300  |
| C                                             | -3.48163045 | 2.92638809  | -2.47049900  |
| H                                             | -1.91839145 | 3.38432209  | -1.08251200  |
| C                                             | -4.43578845 | 1.98910709  | -2.88527500  |
| H                                             | -5.29775145 | 0.03914209  | -2.54231000  |
| H                                             | -3.39908745 | 3.87967809  | -2.98335700  |
| H                                             | -5.09103845 | 2.21834209  | -3.72060800  |
| H                                             | -2.22179745 | 0.14984709  | 0.93923600   |
| Sum of electronic and zero-point Energies=    |             |             | -4969.096617 |
| Sum of electronic and thermal Energies=       |             |             | -4969.049364 |
| Sum of electronic and thermal Enthalpies=     |             |             | -4969.048420 |
| Sum of electronic and thermal Free Energies=  |             |             | -4969.179411 |
| Imaginary frequency: -110.65 cm <sup>-1</sup> |             |             |              |

**H-TS-major2**

|   |             |             |             |
|---|-------------|-------------|-------------|
| S | -0.40145985 | 0.03649635  | 0.00000000  |
| N | -4.94036885 | 0.84301235  | 0.66045500  |
| N | -4.46309085 | 1.15908035  | -1.92033600 |
| N | -5.94402785 | -0.99585365 | -1.25839800 |
| C | -0.82544785 | 0.41812135  | 1.69901200  |
| C | -1.01932185 | 1.75299035  | 2.07864000  |
| H | -0.90803185 | 2.54752135  | 1.34782900  |

|    |             |             |             |
|----|-------------|-------------|-------------|
| C  | -1.36991485 | 2.05163435  | 3.39673300  |
| H  | -1.51934985 | 3.08689735  | 3.68885200  |
| C  | -1.53461585 | 1.02500935  | 4.32876700  |
| H  | -1.80437585 | 1.26055635  | 5.35424500  |
| C  | -1.36156085 | -0.30788565 | 3.94206700  |
| H  | -1.50200885 | -1.10771265 | 4.66339400  |
| C  | -1.01370085 | -0.61640565 | 2.62839300  |
| H  | -0.90910085 | -1.65028065 | 2.31589100  |
| C  | -5.80171085 | 1.99242935  | 0.63334600  |
| C  | -5.42658285 | 3.12421435  | -0.08158900 |
| C  | -6.36962285 | 4.20326735  | -0.22699500 |
| C  | -7.60670085 | 4.15943235  | 0.49548400  |
| C  | -7.88226585 | 3.03667335  | 1.31862700  |
| H  | -8.80619585 | 3.01636735  | 1.89089600  |
| C  | -7.01832185 | 1.97258735  | 1.36892900  |
| H  | -7.26431985 | 1.10776135  | 1.97397800  |
| C  | -3.61548585 | 2.27080435  | -1.57864100 |
| C  | -4.06152885 | 3.21743935  | -0.66402700 |
| C  | -3.16728785 | 4.27070635  | -0.25726100 |
| C  | -1.89793985 | 4.40964635  | -0.90955700 |
| C  | -1.53083985 | 3.46971835  | -1.90637000 |
| H  | -0.57327985 | 3.57892335  | -2.40842200 |
| C  | -2.34912185 | 2.41108335  | -2.20806000 |
| H  | -2.02826185 | 1.67947235  | -2.93965800 |
| C  | -4.33592285 | 0.66508535  | -3.30700800 |
| H  | -4.33870285 | 1.52519535  | -3.97980100 |
| H  | -5.18681785 | 0.02982335  | -3.54252800 |
| H  | -3.41869985 | 0.08142135  | -3.45860600 |
| C  | -4.74909485 | 0.17927435  | 1.96356200  |
| H  | -4.50909685 | 0.94099735  | 2.70904700  |
| H  | -3.91183885 | -0.51303065 | 1.87722900  |
| H  | -5.63373685 | -0.38078765 | 2.29142300  |
| C  | -5.96799085 | -2.49175965 | -1.42893600 |
| H  | -7.00365485 | -2.69037465 | -1.71390300 |
| C  | -7.28226785 | -0.31217665 | -1.36023700 |
| H  | -7.09877785 | 0.74762635  | -1.17302700 |
| C  | 1.83175815  | 1.09326435  | 0.07019600  |
| C  | 1.65872615  | -0.31034365 | 0.15847500  |
| H  | 1.80022315  | 1.63801535  | 1.01217000  |
| H  | 1.81276015  | -0.87633265 | -0.75905000 |
| Se | -2.87424285 | -1.30000765 | -0.46166000 |
| P  | -4.64442385 | -0.06299565 | -0.74641500 |
| C  | 2.12821415  | 1.87925735  | -1.10244800 |
| C  | 2.34465815  | 3.26634535  | -0.93654200 |
| C  | 2.25744115  | 1.32620335  | -2.39741200 |
| C  | 2.68896115  | 4.06805435  | -2.01899400 |
| H  | 2.25061715  | 3.70312435  | 0.05418300  |
| C  | 2.58618615  | 2.13383935  | -3.47796600 |
| H  | 2.10173015  | 0.26405035  | -2.55832300 |
| C  | 2.80637115  | 3.50477335  | -3.29331600 |
| H  | 2.86996515  | 5.12871035  | -1.87271700 |
| H  | 2.68314215  | 1.69763535  | -4.46751200 |
| H  | 3.07524315  | 4.12892135  | -4.14040600 |
| C  | 2.04499115  | -1.06441965 | 1.40743800  |
| H  | 1.80846615  | -0.50680465 | 2.31683100  |
| H  | 1.55196315  | -2.03951965 | 1.45018200  |
| H  | 3.12840015  | -1.23794865 | 1.38662000  |
| C  | -8.26814685 | -0.81558265 | -0.29509900 |

|                                               |             |             |              |
|-----------------------------------------------|-------------|-------------|--------------|
| H                                             | -9.16284885 | -0.18398965 | -0.29561900  |
| H                                             | -8.59249985 | -1.84360465 | -0.48882400  |
| H                                             | -7.82956885 | -0.78044465 | 0.70572300   |
| C                                             | -7.89358085 | -0.41822565 | -2.76589300  |
| H                                             | -8.08171485 | -1.45599565 | -3.06068400  |
| H                                             | -8.85702885 | 0.10288735  | -2.77816400  |
| H                                             | -7.25853185 | 0.04599235  | -3.52439500  |
| C                                             | -5.72146385 | -3.26904565 | -0.12693300  |
| H                                             | -5.88014385 | -4.33880765 | -0.30319300  |
| H                                             | -4.69959985 | -3.13108765 | 0.23413700   |
| H                                             | -6.41496785 | -2.94911765 | 0.65745000   |
| C                                             | -5.10239585 | -2.98591765 | -2.59627800  |
| H                                             | -5.37790785 | -2.48158065 | -3.52827800  |
| H                                             | -4.03888385 | -2.82017165 | -2.40978700  |
| H                                             | -5.26109785 | -4.06104265 | -2.73620600  |
| C                                             | -1.02509885 | 5.46572135  | -0.53050700  |
| C                                             | -3.47582785 | 5.18163735  | 0.79308600   |
| C                                             | -2.60042085 | 6.18361035  | 1.15007100   |
| C                                             | -1.36616585 | 6.33933235  | 0.47591500   |
| C                                             | -6.13826985 | 5.31458935  | -1.08440400  |
| C                                             | -8.53365385 | 5.22739235  | 0.36624800   |
| C                                             | -8.27027985 | 6.29350835  | -0.46245700  |
| C                                             | -7.06414485 | 6.32822735  | -1.20030200  |
| H                                             | -0.07644385 | 5.56398135  | -1.05252200  |
| H                                             | -0.69230085 | 7.14309135  | 0.75871400   |
| H                                             | -2.86133185 | 6.86253235  | 1.95705200   |
| H                                             | -4.41408885 | 5.07830435  | 1.32485200   |
| H                                             | -5.22447685 | 5.35437535  | -1.66613800  |
| H                                             | -6.86830785 | 7.16091835  | -1.86991800  |
| H                                             | -8.98839685 | 7.10235635  | -0.56041500  |
| H                                             | -9.46322485 | 5.18024035  | 0.92798600   |
| Sum of electronic and zero-point Energies=    |             |             | -4969.094035 |
| Sum of electronic and thermal Energies=       |             |             | -4969.046748 |
| Sum of electronic and thermal Enthalpies=     |             |             | -4969.045804 |
| Sum of electronic and thermal Free Energies=  |             |             | -4969.177083 |
| Imaginary frequency: -114.73 cm <sup>-1</sup> |             |             |              |

**H-TS-minor1**

|   |             |             |             |
|---|-------------|-------------|-------------|
| S | -0.15328467 | 0.73722627  | 0.00000000  |
| N | 4.21187033  | 1.94341027  | 1.01207000  |
| N | 3.98761633  | 2.04069027  | -1.62933000 |
| N | 4.31103733  | 4.41141827  | -0.39511700 |
| C | 0.39231033  | 0.19213627  | 1.61615400  |
| C | 1.46137833  | -0.70750473 | 1.73533200  |
| H | 1.96720633  | -1.07412673 | 0.84929500  |
| C | 1.87879533  | -1.11931973 | 3.00146700  |
| H | 2.70207433  | -1.82245673 | 3.08873300  |
| C | 1.24470033  | -0.62850073 | 4.14528200  |
| H | 1.57115633  | -0.95305273 | 5.12910500  |
| C | 0.19300633  | 0.28470327  | 4.02568800  |
| H | -0.29446167 | 0.67480227  | 4.91442200  |
| C | -0.23436467 | 0.69875827  | 2.76490600  |
| H | -1.04356667 | 1.41586027  | 2.66746700  |
| C | 5.50737133  | 1.33986227  | 0.87645900  |
| C | 5.72373833  | 0.36338027  | -0.09061600 |
| C | 7.06622633  | -0.10689573 | -0.32052900 |

|    |             |             |             |
|----|-------------|-------------|-------------|
| C  | 8.11937533  | 0.31017727  | 0.55740500  |
| C  | 7.81544033  | 1.20322327  | 1.61747000  |
| H  | 8.60605233  | 1.49669127  | 2.30333000  |
| C  | 6.55468833  | 1.72450827  | 1.75843500  |
| H  | 6.35295033  | 2.43638027  | 2.55017000  |
| C  | 3.76277933  | 0.62145127  | -1.62263300 |
| C  | 4.58100933  | -0.20140673 | -0.85706700 |
| C  | 4.29322733  | -1.61258773 | -0.79694900 |
| C  | 3.27649033  | -2.16372773 | -1.64556000 |
| C  | 2.53309633  | -1.28974773 | -2.47964500 |
| H  | 1.77631833  | -1.70767573 | -3.13944600 |
| C  | 2.74163133  | 0.06559627  | -2.44170100 |
| H  | 2.13332633  | 0.71664727  | -3.05733800 |
| C  | 3.65299033  | 2.72872527  | -2.89408100 |
| H  | 4.07467333  | 2.15422627  | -3.72158100 |
| H  | 4.09656933  | 3.72164227  | -2.89154500 |
| H  | 2.56960733  | 2.83698427  | -3.03314400 |
| C  | 3.72173733  | 2.18502527  | 2.38366500  |
| H  | 3.86841133  | 1.27533627  | 2.96975400  |
| H  | 2.65645233  | 2.41165727  | 2.33179800  |
| H  | 4.23265733  | 3.02012527  | 2.87944800  |
| C  | 3.65831633  | 5.76234927  | -0.26395400 |
| H  | 4.49700533  | 6.45257827  | -0.37948700 |
| C  | 5.81379733  | 4.42650227  | -0.48154500 |
| H  | 6.12693333  | 3.38204827  | -0.53024600 |
| C  | -1.25572167 | -0.94824973 | -0.63851000 |
| C  | -2.34456967 | -0.34170273 | 0.03552000  |
| Se | 1.42911233  | 3.14096227  | 0.07305500  |
| P  | 3.56322433  | 2.91632727  | -0.22642100 |
| H  | -2.44529367 | -0.58913273 | 1.09126800  |
| H  | -1.20171267 | -0.79711273 | -1.71527400 |
| C  | -3.37397667 | 0.50566727  | -0.51315200 |
| C  | -4.35931967 | 1.01237627  | 0.36474800  |
| C  | -3.46058367 | 0.82842127  | -1.88695900 |
| C  | -5.39191967 | 1.81112427  | -0.11003200 |
| H  | -4.30525167 | 0.76677427  | 1.42225800  |
| C  | -4.49067267 | 1.63207127  | -2.35551400 |
| H  | -2.72514467 | 0.44582427  | -2.58766000 |
| C  | -5.45785367 | 2.12511727  | -1.47069800 |
| H  | -6.14436367 | 2.18979527  | 0.57472600  |
| H  | -4.54931467 | 1.87348627  | -3.41237300 |
| H  | -6.26402967 | 2.74947927  | -1.84440100 |
| C  | -0.69662267 | -2.27069173 | -0.17542500 |
| H  | 0.32237833  | -2.42347373 | -0.53950000 |
| H  | -0.70110967 | -2.36201673 | 0.91324800  |
| H  | -1.32440067 | -3.07269473 | -0.58545700 |
| C  | 6.45617533  | 5.05397827  | 0.76474200  |
| H  | 7.53873633  | 4.89010727  | 0.74190100  |
| H  | 6.28915533  | 6.13524927  | 0.81293000  |
| H  | 6.06546433  | 4.60795327  | 1.68297700  |
| C  | 6.32546033  | 5.10437727  | -1.76226500 |
| H  | 6.02647333  | 6.15610027  | -1.82526400 |
| H  | 7.42052833  | 5.07707927  | -1.76998700 |
| H  | 5.97714133  | 4.59207227  | -2.66249300 |
| C  | 2.68349433  | 6.07958927  | -1.40607800 |
| H  | 3.17561333  | 5.97941727  | -2.37908800 |
| H  | 1.81122633  | 5.42264027  | -1.38524000 |
| H  | 2.33536733  | 7.11412427  | -1.31012800 |



|                                               |             |             |              |
|-----------------------------------------------|-------------|-------------|--------------|
| C                                             | 3.06346233  | 6.03569627  | 1.12595400   |
| H                                             | 3.80933133  | 5.87025527  | 1.91006900   |
| H                                             | 2.73727333  | 7.08014627  | 1.18468200   |
| H                                             | 2.19996033  | 5.39727027  | 1.32618600   |
| C                                             | 3.01921133  | -3.56166373 | -1.61960300  |
| C                                             | 4.96760033  | -2.50053973 | 0.08970700   |
| C                                             | 4.67979233  | -3.84788573 | 0.10720300   |
| C                                             | 3.70663533  | -4.39124173 | -0.76421500  |
| C                                             | 7.40603933  | -0.95812073 | -1.40868100  |
| C                                             | 9.44104733  | -0.16351973 | 0.34484200   |
| C                                             | 9.73015333  | -0.99792273 | -0.71012100  |
| H                                             | 10.74536733 | -1.34915673 | -0.86958800  |
| C                                             | 8.70123633  | -1.38733473 | -1.59889600  |
| H                                             | 10.22430233 | 0.15723027  | 1.02713400   |
| H                                             | 8.93599133  | -2.02788273 | -2.44430400  |
| H                                             | 6.63442633  | -1.25952473 | -2.10780300  |
| H                                             | 5.20843133  | -4.50091573 | 0.79580800   |
| H                                             | 5.71766933  | -2.10523673 | 0.76419000   |
| H                                             | 3.50190033  | -5.45779873 | -0.75067700  |
| H                                             | 2.26352133  | -3.96355473 | -2.29071000  |
| Sum of electronic and zero-point Energies=    |             |             | -4969.093795 |
| Sum of electronic and thermal Energies=       |             |             | -4969.046656 |
| Sum of electronic and thermal Enthalpies=     |             |             | -4969.045712 |
| Sum of electronic and thermal Free Energies=  |             |             | -4969.176641 |
| Imaginary frequency: -107.68 cm <sup>-1</sup> |             |             |              |

**H-TS-minor2**

|   |             |             |             |
|---|-------------|-------------|-------------|
| S | 0.53284671  | 0.67883211  | 0.00000000  |
| N | -3.42014929 | 2.04874911  | 1.74552800  |
| N | -3.85623829 | 2.00875011  | -0.87169200 |
| N | -5.32007829 | 0.28620511  | 0.59950800  |
| C | 0.63197771  | 1.20809011  | 1.70522800  |
| C | 0.45730071  | 2.56351511  | 2.01041000  |
| H | 0.29906771  | 3.28353111  | 1.21395700  |
| C | 0.48447371  | 2.97504111  | 3.34413000  |
| H | 0.35393171  | 4.02607011  | 3.58479600  |
| C | 0.67779371  | 2.04067311  | 4.36286000  |
| H | 0.69579671  | 2.36407211  | 5.39954500  |
| C | 0.84242971  | 0.68670611  | 4.05341000  |
| H | 0.98085971  | -0.04152189 | 4.84703600  |
| C | 0.81644371  | 0.26436111  | 2.72598900  |
| H | 0.91719171  | -0.78976489 | 2.48496600  |
| C | -4.02050629 | 3.34851011  | 1.81492100  |
| C | -3.74133129 | 4.29853811  | 0.83740800  |
| C | -4.47540529 | 5.53890711  | 0.83861800  |
| C | -5.34741429 | 5.84081811  | 1.93529400  |
| C | -5.48990429 | 4.89150011  | 2.98020200  |
| H | -6.12783529 | 5.13111511  | 3.82710900  |
| C | -4.86733429 | 3.67153211  | 2.91132200  |
| H | -5.01994529 | 2.94487411  | 3.70051000  |
| C | -2.77679129 | 2.94238711  | -1.03049900 |
| C | -2.68920529 | 4.04151811  | -0.18251400 |
| C | -1.56034629 | 4.92884611  | -0.30244400 |
| C | -0.64308629 | 4.76558511  | -1.39239600 |
| C | -0.83074129 | 3.68056411  | -2.28610400 |
| H | -0.15225229 | 3.56594511  | -3.12873200 |
| C | -1.84172729 | 2.77352911  | -2.08934100 |

|    |             |             |             |
|----|-------------|-------------|-------------|
| H  | -1.94233429 | 1.93390911  | -2.76636600 |
| C  | -4.30887229 | 1.35003311  | -2.11419100 |
| H  | -4.43084129 | 2.11329911  | -2.88582300 |
| H  | -5.26910129 | 0.87141011  | -1.93675300 |
| H  | -3.60262929 | 0.58399911  | -2.45988400 |
| C  | -2.94947429 | 1.45710311  | 3.01181600  |
| H  | -2.39827929 | 2.21878811  | 3.56821100  |
| H  | -2.28134129 | 0.62892911  | 2.77359900  |
| H  | -3.76608929 | 1.07777311  | 3.63959800  |
| C  | -5.64560829 | -1.18066189 | 0.69698600  |
| H  | -6.73150629 | -1.18523289 | 0.81717800  |
| C  | -6.47360229 | 1.22297811  | 0.82820300  |
| H  | -6.06541729 | 2.23282211  | 0.75462500  |
| C  | 2.69417271  | 1.61748711  | -0.61363500 |
| C  | 2.45619471  | 0.20409911  | -0.72626400 |
| Se | -2.24723129 | -0.54090289 | 0.34957400  |
| P  | -3.78514229 | 0.96035911  | 0.48079600  |
| C  | -7.07819929 | 1.05951911  | 2.23102000  |
| H  | -7.79990429 | 1.86200711  | 2.41719000  |
| H  | -7.60932029 | 0.10791311  | 2.34002900  |
| H  | -6.30831529 | 1.10924811  | 3.00541400  |
| C  | -7.56065729 | 1.10176211  | -0.25157400 |
| H  | -8.01939429 | 0.10745311  | -0.26990100 |
| H  | -8.35783229 | 1.82329211  | -0.04172600 |
| H  | -7.17255029 | 1.32050611  | -1.24942900 |
| C  | -5.06934329 | -1.86573289 | 1.94559700  |
| H  | -5.44672629 | -2.89284189 | 2.00544400  |
| H  | -3.97846529 | -1.90205589 | 1.91078000  |
| H  | -5.37432529 | -1.34092189 | 2.85694000  |
| C  | -5.35390729 | -1.95394789 | -0.59666500 |
| H  | -5.86664429 | -1.49694689 | -1.44957600 |
| H  | -4.28317029 | -1.99123389 | -0.80968800 |
| H  | -5.71960929 | -2.98202989 | -0.49630600 |
| C  | 0.43104671  | 5.68409711  | -1.55004200 |
| C  | -1.30486629 | 5.97856911  | 0.62595800  |
| C  | -0.24006029 | 6.83679111  | 0.46150900  |
| C  | 0.62952271  | 6.70380211  | -0.64668100 |
| C  | -4.39450229 | 6.48146011  | -0.22404500 |
| C  | -6.05832229 | 7.06999511  | 1.95093300  |
| C  | -5.94243129 | 7.96542711  | 0.91298300  |
| C  | -5.11001829 | 7.65824411  | -0.18831900 |
| H  | 1.09000471  | 5.57538811  | -2.40882600 |
| H  | 1.44658171  | 7.40696911  | -0.78279200 |
| H  | -0.07151129 | 7.62880211  | 1.18574900  |
| H  | -1.96265929 | 6.10162911  | 1.47819200  |
| H  | -3.77167029 | 6.25954211  | -1.08281500 |
| H  | -5.03874729 | 8.35544011  | -1.01838000 |
| H  | -6.49608229 | 8.89961311  | 0.92982600  |
| H  | -6.70779629 | 7.28397711  | 2.79615200  |
| C  | 2.33880671  | -0.42833789 | -2.09834200 |
| H  | 1.76665471  | 0.20258711  | -2.78621900 |
| H  | 3.34196071  | -0.56460089 | -2.51891500 |
| H  | 1.85275871  | -1.40553089 | -2.03660700 |
| H  | 2.93495871  | -0.43022289 | 0.01753800  |
| C  | 3.43858471  | 2.32352011  | 0.39500100  |
| C  | 3.43054471  | 3.73794511  | 0.34791800  |
| C  | 4.20586271  | 1.67844711  | 1.39237200  |
| C  | 4.16394871  | 4.48102911  | 1.26227500  |

|                                               |            |            |              |
|-----------------------------------------------|------------|------------|--------------|
| H                                             | 2.82890171 | 4.22819411 | -0.41267000  |
| C                                             | 4.94137471 | 2.42810111 | 2.30090000   |
| H                                             | 4.23711871 | 0.59522811 | 1.44663100   |
| C                                             | 4.92248871 | 3.82670511 | 2.23923700   |
| H                                             | 4.14946371 | 5.56552811 | 1.21690500   |
| H                                             | 5.53731771 | 1.92644911 | 3.05704200   |
| H                                             | 5.50323971 | 4.40582911 | 2.95130000   |
| H                                             | 2.32722071 | 2.22036011 | -1.44166500  |
| Sum of electronic and zero-point Energies=    |            |            | -4969.091537 |
| Sum of electronic and thermal Energies=       |            |            | -4969.044074 |
| Sum of electronic and thermal Enthalpies=     |            |            | -4969.043129 |
| Sum of electronic and thermal Free Energies=  |            |            | -4969.174739 |
| Imaginary frequency: -103.60 cm <sup>-1</sup> |            |            |              |

### Transitions State Structures with the 2,6-Dimethylphenylsulfenyl Group (R = Me)

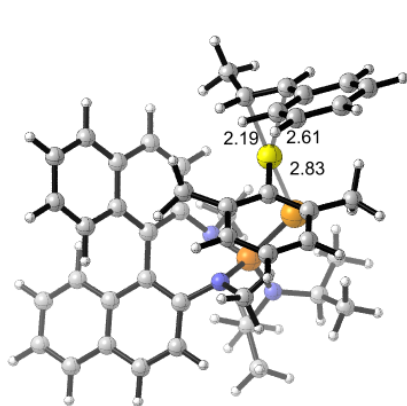

**Me-TS-major1**

$\Delta\Delta G$  (253K) = 0.0 (0.0) kcal/mol

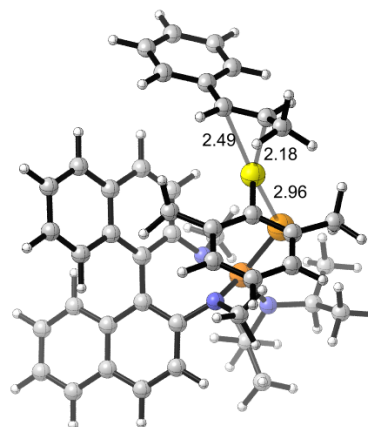

**Me-TS-major2**

$\Delta\Delta G$  (253K) = 1.8 (1.0) kcal/mol

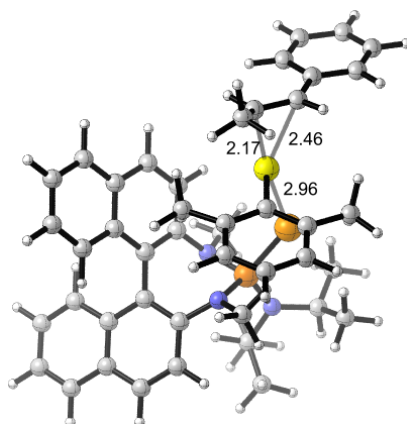

**Me-TS-minor1**

$\Delta\Delta G$  (253K) = 3.5 (2.2) kcal/mol

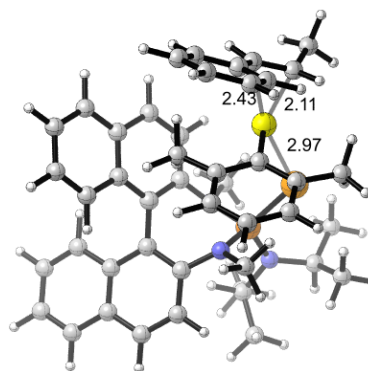

**Me-TS-minor2**

$\Delta\Delta G$  (253K) = 5.4 (4.6) kcal/mol

**Cartesian Coordinates of Me-TS-major1, Me-TS-major2, Me-TS-minor1, Me-TS-minor2****Me-TS-major1**

|    |             |             |             |
|----|-------------|-------------|-------------|
| S  | 0.19708029  | 0.10948905  | 0.00000000  |
| N  | 4.25665729  | -0.54020195 | -1.86434600 |
| N  | 5.01232129  | -0.53334395 | 0.67122600  |
| N  | 5.11039129  | -2.92447995 | -0.56858400 |
| C  | -0.02710071 | 0.22006005  | -1.76581500 |
| C  | 0.47001929  | 1.34357805  | -2.47808100 |
| C  | 0.26169129  | 1.39285305  | -3.86187400 |
| H  | 0.63284529  | 2.24922005  | -4.41888000 |
| C  | -0.39293371 | 0.36193105  | -4.53088100 |
| H  | -0.53862771 | 0.41925405  | -5.60609800 |
| C  | -0.84508071 | -0.75194195 | -3.82578500 |
| H  | -1.33713871 | -1.56324695 | -4.35480200 |
| C  | -0.67579871 | -0.84949095 | -2.44184100 |
| C  | 5.44117429  | 0.20018705  | -2.20563200 |
| C  | 5.87876329  | 1.23855505  | -1.38764500 |
| C  | 7.15567629  | 1.84809805  | -1.65777400 |
| C  | 7.86893129  | 1.49531705  | -2.84976000 |
| C  | 7.30805029  | 0.52828405  | -3.72315100 |
| H  | 7.83090529  | 0.28190105  | -4.64372200 |
| C  | 6.14337229  | -0.12019995 | -3.39991100 |
| H  | 5.75367629  | -0.88385495 | -4.06256800 |
| C  | 4.61364329  | 0.84840605  | 0.72967800  |
| C  | 5.02374529  | 1.72119005  | -0.27044700 |
| C  | 4.57446129  | 3.08990505  | -0.22938800 |
| C  | 3.83202429  | 3.55411605  | 0.90646000  |
| C  | 3.49626429  | 2.63296705  | 1.93173000  |
| H  | 2.94310429  | 2.98728805  | 2.79830200  |
| C  | 3.83963029  | 1.30847805  | 1.82831500  |
| H  | 3.53589429  | 0.61106805  | 2.59947700  |
| C  | 5.24634029  | -1.17997895 | 1.97962900  |
| H  | 5.84325929  | -0.50315495 | 2.59423900  |
| H  | 5.80066729  | -2.10413295 | 1.83175200  |
| H  | 4.31004629  | -1.41899295 | 2.50020600  |
| C  | 3.35304229  | -0.92419695 | -2.96555300 |
| H  | 3.15268929  | -0.04341795 | -3.57926600 |
| H  | 2.41943429  | -1.27650795 | -2.52737400 |
| H  | 3.76321429  | -1.71942295 | -3.60080700 |
| C  | 4.59414929  | -4.33307695 | -0.44083900 |
| H  | 5.48105529  | -4.94002495 | -0.63599300 |
| C  | 6.53747829  | -2.79903895 | -1.03514500 |
| H  | 6.74207529  | -1.72917695 | -1.10708100 |
| C  | -1.07509871 | 1.75202605  | 0.70090000  |
| C  | -2.20947771 | 0.93303805  | 0.58680400  |
| Se | 2.13682829  | -1.94593295 | 0.07110600  |
| P  | 4.21031929  | -1.51013695 | -0.46762500 |
| C  | 6.74110929  | -3.41375895 | -2.42793400 |
| H  | 7.73801329  | -3.15524795 | -2.80030400 |
| H  | 6.67123929  | -4.50658795 | -2.40859800 |
| H  | 6.00452129  | -3.03787895 | -3.14277300 |
| C  | 7.54293529  | -3.37999495 | -0.02896200 |
| H  | 7.40071529  | -4.45430495 | 0.12874300  |

|                                               |             |             |              |
|-----------------------------------------------|-------------|-------------|--------------|
| H                                             | 8.55803429  | -3.24044595 | -0.41632000  |
| H                                             | 7.48898429  | -2.87897095 | 0.94061900   |
| C                                             | 4.13706829  | -4.68455095 | 0.98117200   |
| H                                             | 4.92983229  | -4.48398295 | 1.70905300   |
| H                                             | 3.24660729  | -4.12059095 | 1.27013700   |
| H                                             | 3.89417929  | -5.75175295 | 1.03236200   |
| C                                             | 3.56126929  | -4.71426995 | -1.51105700  |
| H                                             | 3.94826929  | -4.52233295 | -2.51702800  |
| H                                             | 3.32974629  | -5.78243995 | -1.43436200  |
| H                                             | 2.63550229  | -4.15129095 | -1.37789200  |
| C                                             | 3.42201329  | 4.91302805  | 0.97186100   |
| C                                             | 4.81761929  | 4.01564305  | -1.28397400  |
| C                                             | 4.39013429  | 5.32254905  | -1.19946300  |
| C                                             | 3.69734429  | 5.78476605  | -0.05565200  |
| C                                             | 7.76294629  | 2.78009705  | -0.77066800  |
| C                                             | 9.12011129  | 2.10688405  | -3.12760300  |
| C                                             | 9.66975729  | 3.01619905  | -2.25381600  |
| H                                             | 10.63043729 | 3.47384905  | -2.47094100  |
| C                                             | 8.98574229  | 3.34462305  | -1.06001900  |
| H                                             | 9.64136329  | 1.83268705  | -4.04137100  |
| H                                             | 9.43252729  | 4.04582405  | -0.36091400  |
| H                                             | 7.25947529  | 3.03697905  | 0.15425400   |
| H                                             | 4.58905329  | 6.00644805  | -2.01981200  |
| H                                             | 5.34489629  | 3.68332805  | -2.17005300  |
| H                                             | 3.37869429  | 6.82148505  | 0.00301400   |
| H                                             | 2.87791329  | 5.24942405  | 1.85126600   |
| H                                             | -0.92763471 | 2.52078505  | -0.05223600  |
| C                                             | -0.49259571 | 2.06667305  | 2.05874200   |
| H                                             | -1.05374471 | 2.89317805  | 2.51289200   |
| H                                             | -0.55690971 | 1.20680505  | 2.73377800   |
| H                                             | 0.55455929  | 2.36734205  | 1.97508800   |
| C                                             | -3.17388871 | 0.88118505  | -0.47965000  |
| C                                             | -4.23814071 | -0.04616995 | -0.37060500  |
| C                                             | -3.13697771 | 1.73553205  | -1.60726200  |
| C                                             | -5.22392571 | -0.11792395 | -1.34561800  |
| H                                             | -4.28133971 | -0.70307595 | 0.49442500   |
| C                                             | -4.12238571 | 1.65597605  | -2.58183900  |
| H                                             | -2.33902271 | 2.46180005  | -1.71551100  |
| C                                             | -5.16685571 | 0.73252005  | -2.45476000  |
| H                                             | -6.03701771 | -0.83017895 | -1.24493200  |
| H                                             | -4.08509871 | 2.31782105  | -3.44160500  |
| H                                             | -5.93863771 | 0.68081905  | -3.21721300  |
| H                                             | -2.40200071 | 0.26622605  | 1.42650100   |
| C                                             | 1.22054029  | 2.47814405  | -1.82215300  |
| H                                             | 0.54313629  | 3.25670505  | -1.44525500  |
| H                                             | 1.82748329  | 2.14025905  | -0.98048800  |
| H                                             | 1.88154529  | 2.96699105  | -2.54318700  |
| C                                             | -1.13190271 | -2.09883395 | -1.72953600  |
| H                                             | -0.27593171 | -2.60822895 | -1.27386300  |
| H                                             | -1.84142371 | -1.87856795 | -0.92619700  |
| H                                             | -1.61103771 | -2.78849095 | -2.42951900  |
| Sum of electronic and zero-point Energies=    |             |             | -5047.674461 |
| Sum of electronic and thermal Energies=       |             |             | -5047.625032 |
| Sum of electronic and thermal Enthalpies=     |             |             | -5047.624087 |
| Sum of electronic and thermal Free Energies=  |             |             | -5047.757211 |
| Imaginary frequency: -153.55 cm <sup>-1</sup> |             |             |              |

**Me-TS-major2**

|    |             |             |             |
|----|-------------|-------------|-------------|
| S  | -0.10948905 | 0.22627737  | 0.00000000  |
| N  | -4.71375705 | 0.33720337  | 0.40097500  |
| N  | -4.66836405 | 0.98261437  | -2.14957000 |
| N  | -5.58617705 | -1.49031663 | -1.58548200 |
| C  | -0.54382405 | 0.00437037  | 1.71462700  |
| C  | -0.92994205 | 1.12490537  | 2.49423200  |
| C  | -1.24518405 | 0.91212537  | 3.84164900  |
| H  | -1.53192105 | 1.76177437  | 4.45519400  |
| C  | -1.20224305 | -0.36279463 | 4.39983400  |
| H  | -1.45005505 | -0.50459263 | 5.44806000  |
| C  | -0.85845505 | -1.46080163 | 3.61239600  |
| H  | -0.85348705 | -2.45654863 | 4.04674200  |
| C  | -0.52425505 | -1.30791763 | 2.26414800  |
| C  | -5.73635305 | 1.32705237  | 0.60133100  |
| C  | -5.64421505 | 2.57300537  | -0.01462700 |
| C  | -6.75798005 | 3.48113937  | 0.07819900  |
| C  | -7.86295705 | 3.15978537  | 0.93229600  |
| C  | -7.84482705 | 1.93274137  | 1.64409900  |
| H  | -8.66842405 | 1.69882437  | 2.31384200  |
| C  | -6.82651705 | 1.03128437  | 1.46526400  |
| H  | -6.85257005 | 0.08215237  | 1.98754400  |
| C  | -3.93529505 | 2.16463937  | -1.78060000 |
| C  | -4.40125505 | 2.95339037  | -0.73696100 |
| C  | -3.63091605 | 4.10238637  | -0.33514900 |
| C  | -2.46746005 | 4.46747137  | -1.09064800 |
| C  | -2.06132905 | 3.64778337  | -2.17514000 |
| H  | -1.17058005 | 3.91818137  | -2.73584500 |
| C  | -2.75451305 | 2.50740137  | -2.49040300 |
| H  | -2.40425005 | 1.86380537  | -3.28851100 |
| C  | -4.69929005 | 0.68554937  | -3.59534200 |
| H  | -4.93029105 | 1.61068537  | -4.12766700 |
| H  | -5.48164505 | -0.04260263 | -3.79774100 |
| H  | -3.74905105 | 0.28042237  | -3.96622100 |
| C  | -4.27625405 | -0.43676963 | 1.57658600  |
| H  | -4.07872505 | 0.25336437  | 2.39989800  |
| H  | -3.35248605 | -0.95318763 | 1.31525400  |
| H  | -5.01380905 | -1.18149663 | 1.90132500  |
| C  | -5.34048205 | -2.92647463 | -1.96041300 |
| H  | -6.34748305 | -3.31360863 | -2.13123600 |
| C  | -7.02980705 | -1.10145563 | -1.41584500 |
| H  | -7.03022505 | -0.04513963 | -1.13982700 |
| C  | 1.91058395  | 1.66931537  | -0.11739800 |
| C  | 2.06401095  | 0.29230537  | 0.15059000  |
| H  | 1.83316895  | 2.32224237  | 0.74927800  |
| H  | 2.32900595  | -0.35554063 | -0.68140900 |
| Se | -2.41494205 | -1.16363563 | -1.24073400 |
| P  | -4.43331105 | -0.35729363 | -1.12711500 |
| C  | 1.93746295  | 2.32426737  | -1.40170300 |
| C  | 1.89225195  | 3.73670537  | -1.43296400 |
| C  | 2.04978195  | 1.62225637  | -2.62399200 |
| C  | 1.97921395  | 4.42346637  | -2.63804100 |
| H  | 1.80027995  | 4.28609737  | -0.49988300 |
| C  | 2.11758795  | 2.31287137  | -3.82679300 |
| H  | 2.08290295  | 0.53745037  | -2.63226100 |
| C  | 2.08910995  | 3.71288737  | -3.83783300 |
| H  | 1.96502495  | 5.50917737  | -2.64676700 |

|                                               |             |             |              |
|-----------------------------------------------|-------------|-------------|--------------|
| H                                             | 2.20364495  | 1.76444037  | -4.75978900  |
| H                                             | 2.15763295  | 4.24787637  | -4.78051400  |
| C                                             | 2.58369895  | -0.15513763 | 1.49317900   |
| H                                             | 2.22991195  | 0.48534737  | 2.30518200   |
| H                                             | 2.31315995  | -1.18809363 | 1.71814300   |
| H                                             | 3.68018995  | -0.10005263 | 1.46974600   |
| C                                             | -7.70276605 | -1.88781163 | -0.28109500  |
| H                                             | -8.69540305 | -1.47076363 | -0.08036700  |
| H                                             | -7.83553805 | -2.94418163 | -0.53825600  |
| H                                             | -7.11832005 | -1.83368063 | 0.64133500   |
| C                                             | -7.83895605 | -1.21972463 | -2.71722600  |
| H                                             | -7.89471405 | -2.25028663 | -3.08358900  |
| H                                             | -8.86562405 | -0.88659863 | -2.53013900  |
| H                                             | -7.42994005 | -0.59308663 | -3.51362600  |
| C                                             | -4.73295705 | -3.76814663 | -0.82959300  |
| H                                             | -4.70591305 | -4.82185963 | -1.12888400  |
| H                                             | -3.71397605 | -3.44319863 | -0.61324600  |
| H                                             | -5.33024205 | -3.68973363 | 0.08452400   |
| C                                             | -4.58450905 | -3.08300663 | -3.28653600  |
| H                                             | -5.08863505 | -2.53946063 | -4.09225800  |
| H                                             | -3.55676305 | -2.71907763 | -3.20692300  |
| H                                             | -4.54930005 | -4.14236863 | -3.56432800  |
| C                                             | -1.72362805 | 5.62026537  | -0.72006700  |
| C                                             | -3.95486105 | 4.89265837  | 0.80481900   |
| C                                             | -3.20315705 | 5.99511837  | 1.14777600   |
| C                                             | -2.08228805 | 6.37514037  | 0.37237600   |
| C                                             | -6.82514505 | 4.68944337  | -0.67014100  |
| C                                             | -8.95464505 | 4.06187037  | 1.03857900   |
| C                                             | -8.97795805 | 5.22959937  | 0.31172700   |
| C                                             | -7.90544205 | 5.53683737  | -0.55783400  |
| H                                             | -0.85802105 | 5.89148637  | -1.31972500  |
| H                                             | -1.50764805 | 7.25555237  | 0.64592700   |
| H                                             | -3.47536305 | 6.57999437  | 2.02192500   |
| H                                             | -4.80726005 | 4.61938637  | 1.41512600   |
| H                                             | -6.01773505 | 4.93720237  | -1.34970000  |
| H                                             | -7.93697305 | 6.44837137  | -1.14796700  |
| H                                             | -9.82046705 | 5.91002337  | 0.39390500   |
| H                                             | -9.77954205 | 3.80467137  | 1.69837700   |
| C                                             | -1.01098305 | 2.52656937  | 1.94089400   |
| H                                             | -0.02399405 | 3.00621537  | 1.90569000   |
| H                                             | -1.41615005 | 2.54619537  | 0.92719500   |
| H                                             | -1.64515405 | 3.15230337  | 2.57434000   |
| C                                             | -0.24022005 | -2.53457963 | 1.43131800   |
| H                                             | -0.98695405 | -2.62520563 | 0.63461000   |
| H                                             | 0.73809495  | -2.49926663 | 0.94060300   |
| H                                             | -0.27565805 | -3.43653863 | 2.04787700   |
| Sum of electronic and zero-point Energies=    |             |             | -5047.669752 |
| Sum of electronic and thermal Energies=       |             |             | -5047.619390 |
| Sum of electronic and thermal Enthalpies=     |             |             | -5047.618446 |
| Sum of electronic and thermal Free Energies=  |             |             | -5047.754750 |
| Imaginary frequency: -137.17 cm <sup>-1</sup> |             |             |              |

**Me-TS-minor1**

|   |             |             |            |
|---|-------------|-------------|------------|
| S | -0.29927007 | -0.67883211 | 0.00000000 |
| N | 4.20525093  | 0.73381389  | 0.50755300 |

|    |             |             |             |
|----|-------------|-------------|-------------|
| N  | 4.12804493  | 0.90133989  | -2.11821200 |
| N  | 4.16157593  | 3.25365489  | -0.79641900 |
| C  | 0.15231193  | -0.79985311 | 1.71604700  |
| C  | 1.06163393  | -1.81772411 | 2.11029200  |
| C  | 1.37667893  | -1.92338211 | 3.46889300  |
| H  | 2.06580193  | -2.69907311 | 3.79127700  |
| C  | 0.83212593  | -1.04637711 | 4.40525900  |
| H  | 1.08489493  | -1.15164911 | 5.45660700  |
| C  | -0.01729507 | -0.01962211 | 3.99546600  |
| H  | -0.41029107 | 0.68113189  | 4.72672500  |
| C  | -0.36614207 | 0.13443589  | 2.65059800  |
| C  | 5.53595493  | 0.20151589  | 0.40850700  |
| C  | 5.84712293  | -0.73893711 | -0.57136600 |
| C  | 7.22102193  | -1.12923611 | -0.75168300 |
| C  | 8.21238093  | -0.67779811 | 0.17959500  |
| C  | 7.81605493  | 0.17145089  | 1.24480400  |
| H  | 8.56022393  | 0.49110789  | 1.96984300  |
| C  | 6.52327293  | 0.61972989  | 1.34247300  |
| H  | 6.24988993  | 1.30161789  | 2.13918200  |
| C  | 3.91989193  | -0.52291811 | -2.13575700 |
| C  | 4.76081593  | -1.33975411 | -1.39110300 |
| C  | 4.51696293  | -2.76007311 | -1.37287000 |
| C  | 3.48119493  | -3.30625211 | -2.20284100 |
| C  | 2.67745393  | -2.42709911 | -2.97304200 |
| H  | 1.88897693  | -2.84458511 | -3.59477300 |
| C  | 2.86719593  | -1.06988011 | -2.91672800 |
| H  | 2.21724493  | -0.40700011 | -3.47520000 |
| C  | 3.86927093  | 1.59151389  | -3.39730500 |
| H  | 4.35130493  | 1.02285889  | -4.19540000 |
| H  | 4.30229493  | 2.58901789  | -3.36310900 |
| H  | 2.79794993  | 1.68986189  | -3.61580900 |
| C  | 3.63332993  | 0.89815789  | 1.85619000  |
| H  | 3.80858093  | -0.01675611 | 2.42656000  |
| H  | 2.55931293  | 1.05377089  | 1.74751100  |
| H  | 4.05790193  | 1.74879489  | 2.40470900  |
| C  | 3.38327693  | 4.53578889  | -0.67945100 |
| H  | 4.16070993  | 5.30272789  | -0.70656000 |
| C  | 5.65835093  | 3.39825089  | -0.76330200 |
| H  | 6.06388193  | 2.38783589  | -0.84575100 |
| C  | -1.76190507 | -2.28156511 | -0.12502900 |
| C  | -2.67738507 | -1.21733111 | -0.30127400 |
| Se | 1.37106993  | 1.68620489  | -0.61711200 |
| P  | 3.53799493  | 1.69446489  | -0.73149500 |
| H  | -3.14680707 | -0.83684111 | 0.60411400  |
| H  | -1.41497807 | -2.80262711 | -1.01362600 |
| C  | -3.11193007 | -0.61760811 | -1.53594200 |
| C  | -4.04067207 | 0.44721489  | -1.47426300 |
| C  | -2.66895207 | -1.06063611 | -2.80413600 |
| C  | -4.51344507 | 1.04427389  | -2.63518500 |
| H  | -4.38650207 | 0.79507489  | -0.50440800 |
| C  | -3.13976307 | -0.45564511 | -3.96120200 |
| H  | -1.96272807 | -1.88097311 | -2.88123300 |
| C  | -4.06199907 | 0.59510789  | -3.88038700 |
| H  | -5.22992907 | 1.85748589  | -2.57528300 |
| H  | -2.79687907 | -0.80283311 | -4.93095900 |
| H  | -4.43097507 | 1.06056089  | -4.78961400 |
| C  | -1.85839407 | -3.13003811 | 1.11908300  |
| H  | -0.92741407 | -3.65423411 | 1.33855800  |



|                                               |             |             |              |
|-----------------------------------------------|-------------|-------------|--------------|
| H                                             | -2.14166907 | -2.54025311 | 1.99486000   |
| H                                             | -2.63423607 | -3.88997111 | 0.95569000   |
| C                                             | 6.14548593  | 4.00018089  | 0.56341200   |
| H                                             | 7.23755593  | 3.93813689  | 0.61850800   |
| H                                             | 5.87139593  | 5.05641189  | 0.65875100   |
| H                                             | 5.73114893  | 3.46273189  | 1.42053600   |
| C                                             | 6.20752093  | 4.19398889  | -1.95794100  |
| H                                             | 5.84470393  | 5.22705489  | -1.97368800  |
| H                                             | 7.30002693  | 4.23494889  | -1.88836900  |
| H                                             | 5.95549893  | 3.72598789  | -2.91276300  |
| C                                             | 2.47357793  | 4.80233789  | -1.88604200  |
| H                                             | 3.04241693  | 4.76552889  | -2.82084000  |
| H                                             | 1.65965193  | 4.07540089  | -1.94184000  |
| H                                             | 2.03351693  | 5.80209489  | -1.79787300  |
| C                                             | 2.65446893  | 4.69804289  | 0.66231000   |
| H                                             | 3.34620293  | 4.58030989  | 1.50292900   |
| H                                             | 2.21432493  | 5.69974689  | 0.72321400   |
| H                                             | 1.85447193  | 3.96176789  | 0.75941200   |
| C                                             | 3.25586193  | -4.70911411 | -2.21346100  |
| C                                             | 5.24273293  | -3.66088611 | -0.54215000  |
| C                                             | 4.98996593  | -5.01495811 | -0.56473200  |
| C                                             | 3.99624593  | -5.55135811 | -1.41716400  |
| C                                             | 7.65053193  | -1.93456011 | -1.84325800  |
| C                                             | 9.56549993  | -1.07532811 | 0.01274400   |
| C                                             | 9.94207793  | -1.86804111 | -1.04671200  |
| H                                             | 10.98047893 | -2.16138711 | -1.17018700  |
| C                                             | 8.97343593  | -2.29054811 | -1.98708400  |
| H                                             | 10.30168793 | -0.73007911 | 0.73443900   |
| H                                             | 9.27749393  | -2.89800911 | -2.83483700  |
| H                                             | 6.92379993  | -2.25918811 | -2.57924400  |
| H                                             | 5.56077493  | -5.67826111 | 0.07909500   |
| H                                             | 6.00543693  | -3.27242811 | 0.12160300   |
| H                                             | 3.81631993  | -6.62246711 | -1.43330600  |
| H                                             | 2.47929693  | -5.10474511 | -2.86394800  |
| C                                             | 1.74617193  | -2.72778011 | 1.11830600   |
| H                                             | 1.04245393  | -3.34249011 | 0.54772100   |
| H                                             | 2.31735793  | -2.15274511 | 0.38210800   |
| H                                             | 2.43859493  | -3.40225911 | 1.62834600   |
| C                                             | -1.21908207 | 1.30660089  | 2.23217600   |
| H                                             | -0.68922507 | 1.90244289  | 1.48070700   |
| H                                             | -2.17188907 | 0.99931189  | 1.78691400   |
| H                                             | -1.44178907 | 1.94645889  | 3.08999800   |
| Sum of electronic and zero-point Energies=    |             |             | -5047.668186 |
| Sum of electronic and thermal Energies=       |             |             | -5047.618544 |
| Sum of electronic and thermal Enthalpies=     |             |             | -5047.617599 |
| Sum of electronic and thermal Free Energies=  |             |             | -5047.751810 |
| Imaginary frequency: -140.01 cm <sup>-1</sup> |             |             |              |

**Me-TS-minor2**

|   |             |             |             |
|---|-------------|-------------|-------------|
| S | -0.27007299 | -0.29927007 | 0.00000000  |
| N | -4.36741499 | 0.20850993  | 1.85182300  |
| N | -5.00880799 | 0.22683893  | -0.71185400 |
| N | -5.88288599 | -1.90068107 | 0.70415900  |
| C | -0.11194399 | 0.03461493  | 1.73870300  |
| C | -0.39585499 | 1.35991693  | 2.14897600  |

|    |             |             |             |
|----|-------------|-------------|-------------|
| C  | -0.29755699 | 1.64711293  | 3.51778600  |
| H  | -0.49880399 | 2.65996493  | 3.85567100  |
| C  | 0.04277001  | 0.66513693  | 4.44284800  |
| H  | 0.11143401  | 0.91456093  | 5.49841200  |
| C  | 0.27139301  | -0.64384407 | 4.02088100  |
| H  | 0.50498501  | -1.41251707 | 4.75231800  |
| C  | 0.19170301  | -0.99774407 | 2.66905800  |
| C  | -5.27833999 | 1.29602893  | 2.07382400  |
| C  | -5.36338399 | 2.34577293  | 1.16349900  |
| C  | -6.41926499 | 3.31639093  | 1.31864200  |
| C  | -7.23627999 | 3.28797893  | 2.49656700  |
| C  | -7.00638199 | 2.28007593  | 3.46772200  |
| H  | -7.60493299 | 2.27422393  | 4.37516500  |
| C  | -6.07644599 | 1.29644193  | 3.25088900  |
| H  | -5.94968599 | 0.50738993  | 3.98306400  |
| C  | -4.21747999 | 1.41792693  | -0.85303100 |
| C  | -4.36798799 | 2.45679693  | 0.06223400  |
| C  | -3.55058499 | 3.63905693  | -0.08134200 |
| C  | -2.74519199 | 3.79735593  | -1.25870400 |
| C  | -2.66823199 | 2.72708893  | -2.18471300 |
| H  | -2.05287099 | 2.84131593  | -3.07354400 |
| C  | -3.35237399 | 1.55783993  | -1.97130200 |
| H  | -3.26005899 | 0.74570393  | -2.68191400 |
| C  | -5.38839299 | -0.43612607 | -1.97904000 |
| H  | -5.75841899 | 0.32545293  | -2.66853700 |
| H  | -6.18405599 | -1.15259607 | -1.78665900 |
| H  | -4.54883799 | -0.97191807 | -2.43984700 |
| C  | -3.64439099 | -0.32516307 | 3.02274200  |
| H  | -3.24205299 | 0.51237593  | 3.59614100  |
| H  | -2.81994099 | -0.94018207 | 2.65954600  |
| H  | -4.27766799 | -0.93906207 | 3.67648300  |
| C  | -5.83552099 | -3.40639607 | 0.70052000  |
| H  | -6.87307499 | -3.68502007 | 0.89764300  |
| C  | -7.20867699 | -1.30094507 | 1.08596400  |
| H  | -7.07014399 | -0.21822207 | 1.07318500  |
| C  | 1.92454001  | 0.59959693  | -0.55196400 |
| C  | 1.68039001  | -0.78915107 | -0.63860200 |
| Se | -2.74133099 | -1.94851407 | 0.14539400  |
| P  | -4.57794399 | -0.85498407 | 0.53703300  |
| C  | -7.63798299 | -1.70678407 | 2.50393100  |
| H  | -8.51771099 | -1.12653807 | 2.80170400  |
| H  | -7.90908899 | -2.76641607 | 2.56360000  |
| H  | -6.84432299 | -1.51710207 | 3.23111000  |
| C  | -8.31419099 | -1.61858607 | 0.06703200  |
| H  | -8.51411699 | -2.69252607 | -0.01041700 |
| H  | -9.24499499 | -1.13739007 | 0.38634500  |
| H  | -8.07238699 | -1.23992907 | -0.92943200 |
| C  | -5.00046399 | -4.00187807 | 1.84369500  |
| H  | -5.11154299 | -5.09205107 | 1.84966000  |
| H  | -3.94137399 | -3.76526107 | 1.72249900  |
| H  | -5.33721599 | -3.62189607 | 2.81380500  |
| C  | -5.48590099 | -4.00632207 | -0.66798500 |
| H  | -6.16724199 | -3.64008507 | -1.44263100 |
| H  | -4.46102399 | -3.76964807 | -0.96185900 |
| H  | -5.58435899 | -5.09662507 | -0.62219300 |
| C  | -2.02517099 | 5.00329193  | -1.46404600 |
| C  | -3.56661999 | 4.70982593  | 0.85509700  |
| C  | -2.84278099 | 5.86097893  | 0.63560800  |

|                                               |             |             |              |
|-----------------------------------------------|-------------|-------------|--------------|
| C                                             | -2.07221499 | 6.01958793  | -0.54076400  |
| C                                             | -6.71303599 | 4.30086193  | 0.33381200   |
| C                                             | -8.26453599 | 4.25270193  | 2.66525500   |
| C                                             | -8.50753099 | 5.20083093  | 1.69905700   |
| C                                             | -7.72898699 | 5.21290793  | 0.51841200   |
| H                                             | -1.43834699 | 5.10802493  | -2.37345700  |
| H                                             | -1.52347499 | 6.94132993  | -0.71044100  |
| H                                             | -2.86919399 | 6.65967093  | 1.37158900   |
| H                                             | -4.15305599 | 4.61167093  | 1.76010800   |
| H                                             | -6.13717599 | 4.32175793  | -0.58385300  |
| H                                             | -7.93828899 | 5.94640993  | -0.25510500  |
| H                                             | -9.30104299 | 5.93022093  | 1.83271300   |
| H                                             | -8.86594099 | 4.21844693  | 3.57022000   |
| C                                             | 1.47584501  | -1.44288907 | -1.98162300  |
| H                                             | 0.91193701  | -0.80181407 | -2.66690800  |
| H                                             | 2.46271001  | -1.62889207 | -2.42265000  |
| H                                             | 0.95558601  | -2.40044307 | -1.89067400  |
| H                                             | 2.11330501  | -1.43884507 | 0.11501800   |
| C                                             | 2.65963801  | 1.31453693  | 0.46531000   |
| C                                             | 2.78323101  | 2.71647793  | 0.33614800   |
| C                                             | 3.31547501  | 0.68293193  | 1.54875700   |
| C                                             | 3.52426901  | 3.45699393  | 1.24783800   |
| H                                             | 2.29358701  | 3.21921693  | -0.49490300  |
| C                                             | 4.05538401  | 1.42652093  | 2.45863400   |
| H                                             | 3.25924001  | -0.39231807 | 1.67514100   |
| C                                             | 4.16166801  | 2.81418093  | 2.31330100   |
| H                                             | 3.61085301  | 4.53270993  | 1.12931500   |
| H                                             | 4.55901101  | 0.92649993  | 3.28029400   |
| H                                             | 4.74618701  | 3.39075493  | 3.02416800   |
| H                                             | 1.61527901  | 1.19172293  | -1.41091000  |
| C                                             | -0.81656599 | 2.43529993  | 1.19689400   |
| H                                             | -0.07478299 | 2.59438093  | 0.39323500   |
| H                                             | -1.77739899 | 2.21205493  | 0.69264000   |
| H                                             | -0.95226799 | 3.39511793  | 1.72349800   |
| C                                             | 0.36959301  | -2.43660507 | 2.27983800   |
| H                                             | -0.55611199 | -2.81928507 | 1.81292200   |
| H                                             | 1.18491101  | -2.60871407 | 1.55889400   |
| H                                             | 0.58655801  | -3.05457207 | 3.16385100   |
| Sum of electronic and zero-point Energies=    |             |             | -5047.666985 |
| Sum of electronic and thermal Energies=       |             |             | -5047.618220 |
| Sum of electronic and thermal Enthalpies=     |             |             | -5047.617276 |
| Sum of electronic and thermal Free Energies=  |             |             | -5047.748274 |
| Imaginary frequency: -123.25 cm <sup>-1</sup> |             |             |              |

|                     | $\Delta E_{\text{dist\_A}}^a$ | $\Delta E_{\text{dist\_B}}^b$ | $\Delta E_{\text{d}}$ | $\Delta E_{\text{i}}$ | $\Delta E_{\text{act}}^c$ | $\Delta H$        | $\Delta G$        | $\pi(\text{C}=\text{C})\text{-}\sigma^*(\text{S-Se})^d$ |
|---------------------|-------------------------------|-------------------------------|-----------------------|-----------------------|---------------------------|-------------------|-------------------|---------------------------------------------------------|
| <b>H-TS-major1</b>  | <b>9.6</b>                    | <b>26.1</b>                   | <b>35.7</b>           | <b>-24.8</b>          | <b>10.9 (0.0)</b>         | <b>11.9 (0.0)</b> | <b>23.9 (0.0)</b> | <b>63.3 (6.7)</b>                                       |
| <b>H-TS-major2</b>  | 10.7                          | 27.4                          | 38.1                  | -25.6                 | 12.5 (1.6)                | 13.5 (1.6)        | 25.4 (1.5)        | 57.5 (0.9)                                              |
| <b>H-TS-minor1</b>  | <b>10.4</b>                   | <b>28.1</b>                   | <b>38.5</b>           | <b>-25.9</b>          | <b>12.6 (1.7)</b>         | <b>13.6 (1.7)</b> | <b>25.6 (1.7)</b> | <b>64.2 (7.6)</b>                                       |
| <b>H-TS-minor2</b>  | 13.3                          | 33.5                          | 46.8                  | -32.2                 | 14.6 (3.7)                | 15.2 (3.3)        | 26.9 (3.0)        | 56.6 (0.0)                                              |
| <b>Me-TS-major1</b> | <b>7.8</b>                    | <b>22.8</b>                   | <b>30.7</b>           | <b>-19.9</b>          | <b>10.8 (0.0)</b>         | <b>11.2 (0.0)</b> | <b>25.0 (0.0)</b> | <b>61.7 (7.3)</b>                                       |
| <b>Me-TS-major2</b> | 9.0                           | 27.2                          | 36.1                  | -22.4                 | 13.7 (2.9)                | 14.7 (3.5)        | 26.8 (1.8)        | 55.9 (1.5)                                              |
| <b>Me-TS-minor1</b> | <b>9.4</b>                    | <b>28.6</b>                   | <b>38.0</b>           | <b>-23.0</b>          | <b>15.0 (4.2)</b>         | <b>15.3 (4.1)</b> | <b>28.5 (3.5)</b> | <b>62.1 (7.7)</b>                                       |
| <b>Me-TS-minor2</b> | 9.1                           | 29.9                          | 39.0                  | -23.6                 | 15.4 (4.6)                | 15.5 (4.3)        | 30.4 (5.4)        | 54.4 (0.0)                                              |

<sup>a</sup> **A** =  $\beta$ -methylstyrene. <sup>b</sup> **B** = **5c** (H = C<sub>6</sub>H<sub>5</sub>; Me = 2,6-Me<sub>2</sub>C<sub>6</sub>H<sub>3</sub>) <sup>c</sup>  $\Delta E_{\text{act}} = \Delta E_{\text{d}} + \Delta E_{\text{i}}$ ;  $\Delta E_{\text{d}} = \Delta E_{\text{dist\_A}} + \Delta E_{\text{dist\_B}}$ . <sup>d</sup>  $\pi(\text{C}=\text{C})\text{-}\sigma^*(\text{S-Se})$  orbital interaction energy is calculated by NBO analysis.

Crystallographic Data for  $S5^{2+}$ 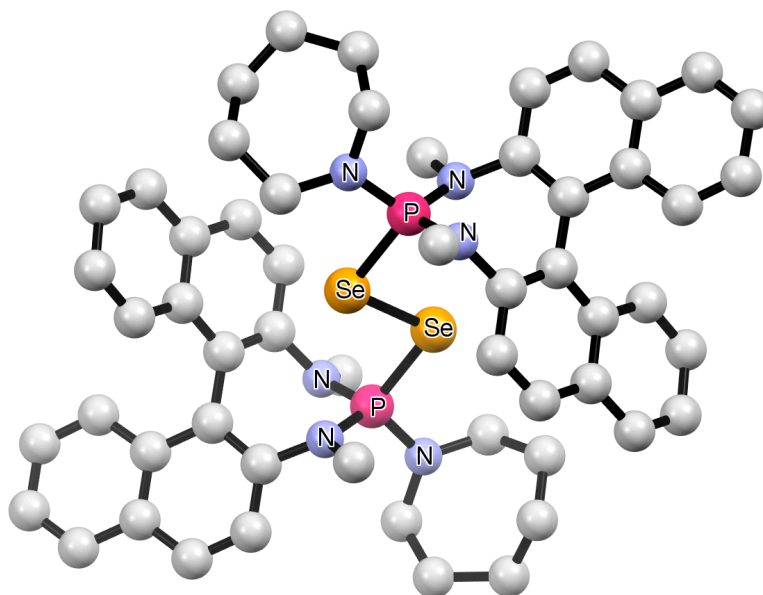

**Figure S1.** ORTEP image of the X-ray crystal structure of  $S5^{2+}$  (Hydrogens and  $SbCl_6^-$  counteranions omitted for clarity).

The crystallographic coordinates have been deposited with the Cambridge Crystallographic Data Centre; deposition no. 1006824. These data can be obtained free of charge via from the Cambridge Crystallographic Data Centre, 12 Union Road, Cambridge CB2 1EZ, UK; fax: (+44)1223-336-033; via [www.ccdc.cam.ac.uk/conts/retrieving.html](http://www.ccdc.cam.ac.uk/conts/retrieving.html) or [deposit@ccdc.cam.ac.uk](mailto:deposit@ccdc.cam.ac.uk).

**Table S1.** Crystal data and structure refinement for bc11tasq

|                      |                                        |                         |
|----------------------|----------------------------------------|-------------------------|
| Identification code  | bc11tasq                               |                         |
| Empirical formula    | $C_{66}H_{76}Cl_{12}N_6O_2P_2Sb_2Se_2$ |                         |
| Formula weight       | 1874.09                                |                         |
| Temperature          | 193(2) K                               |                         |
| Wavelength           | 1.54178 Å                              |                         |
| Crystal system       | Triclinic                              |                         |
| Space group          | P-1                                    |                         |
| Unit cell dimensions | $a = 12.0050(6)$ Å                     | $a = 67.081(2)^\circ$ . |
|                      | $b = 12.2783(6)$ Å                     | $b = 73.258(2)^\circ$ . |
|                      | $c = 14.5779(7)$ Å                     | $g = 88.706(2)^\circ$ . |

|                                   |                                             |
|-----------------------------------|---------------------------------------------|
| Volume                            | 1885.47(16) Å <sup>3</sup>                  |
| Z                                 | 1                                           |
| Density (calculated)              | 1.651 Mg/m <sup>3</sup>                     |
| Absorption coefficient            | 11.470 mm <sup>-1</sup>                     |
| F(000)                            | 934                                         |
| Crystal size                      | 0.374 x 0.215 x 0.172 mm <sup>3</sup>       |
| Theta range for data collection   | 3.45 to 67.82°.                             |
| Index ranges                      | -14<=h<=14, -14<=k<=14, -16<=l<=17          |
| Reflections collected             | 23671                                       |
| Independent reflections           | 6453 [R(int) = 0.0376]                      |
| Completeness to theta = 67.82°    | 94.4 %                                      |
| Absorption correction             | Integration                                 |
| Max. and min. transmission        | 0.3726 and 0.1241                           |
| Refinement method                 | Full-matrix least-squares on F <sup>2</sup> |
| Data / restraints / parameters    | 6453 / 499 / 556                            |
| Goodness-of-fit on F <sup>2</sup> | 1.047                                       |
| Final R indices [I>2sigma(I)]     | R1 = 0.0300, wR2 = 0.0805                   |
| R indices (all data)              | R1 = 0.0315, wR2 = 0.0816                   |
| Largest diff. peak and hole       | 0.511 and -0.432 e.Å <sup>-3</sup>          |

**Table S2.** Atomic coordinates ( $\times 10^4$ ) and equivalent isotropic displacement parameters ( $\text{Å}^2 \times 10^3$ ) for bc11tasq. U(eq) is defined as one third of the trace of the orthogonalized  $U^{ij}$  tensor.

|        | x         | y        | z        | U(eq)  |
|--------|-----------|----------|----------|--------|
| Sb(1)  | -127(5)   | 4413(4)  | 2512(3)  | 38(1)  |
| Cl(1)  | 1698(7)   | 3617(9)  | 2293(6)  | 101(2) |
| Cl(2)  | -476(8)   | 3773(6)  | 1285(4)  | 56(2)  |
| Cl(3)  | -1950(6)  | 5195(6)  | 2703(6)  | 69(1)  |
| Cl(4)  | 221(7)    | 5042(8)  | 3744(5)  | 74(2)  |
| Cl(5)  | -1008(8)  | 2579(4)  | 3876(4)  | 57(2)  |
| Cl(6)  | 771(8)    | 6246(6)  | 1151(5)  | 66(1)  |
| Sb(1B) | 56(8)     | 4348(7)  | 2492(7)  | 42(2)  |
| Cl(1B) | 1247(10)  | 2788(10) | 2581(8)  | 82(3)  |
| Cl(2B) | -635(15)  | 4023(14) | 1258(11) | 64(5)  |
| Cl(3B) | -1114(14) | 5917(11) | 2404(10) | 104(4) |

|        |          |           |          |        |
|--------|----------|-----------|----------|--------|
| Cl(4B) | 701(14)  | 4684(13)  | 3747(11) | 85(5)  |
| Cl(5B) | -1467(9) | 2969(11)  | 3835(8)  | 80(3)  |
| Cl(6B) | 1589(11) | 5721(12)  | 1136(9)  | 115(4) |
| Sb(1C) | 158(5)   | 4446(4)   | 2521(3)  | 37(1)  |
| Cl(1C) | 2013(5)  | 3720(6)   | 2244(6)  | 70(1)  |
| Cl(2C) | -203(6)  | 3843(7)   | 1287(5)  | 53(1)  |
| Cl(3C) | -1657(7) | 5240(9)   | 2754(7)  | 82(2)  |
| Cl(4C) | 545(8)   | 5059(7)   | 3742(5)  | 69(2)  |
| Cl(5C) | -684(6)  | 2591(5)   | 3866(5)  | 62(2)  |
| Cl(6C) | 1016(9)  | 6304(6)   | 1156(6)  | 78(2)  |
| Se(1)  | 137(1)   | 9337(1)   | 797(1)   | 41(1)  |
| P(1)   | 2029(1)  | 9990(1)   | 333(1)   | 33(1)  |
| N(2)   | 2168(2)  | 11434(2)  | -286(2)  | 37(1)  |
| N(3)   | 2920(2)  | 9529(2)   | -496(2)  | 34(1)  |
| N(1)   | 2366(6)  | 9525(7)   | 1411(3)  | 40(1)  |
| C(1)   | 1801(5)  | 8404(5)   | 2307(3)  | 47(1)  |
| C(2)   | 926(5)   | 8600(5)   | 3210(4)  | 59(1)  |
| C(3)   | 1201(5)  | 9687(6)   | 3379(5)  | 65(2)  |
| C(4)   | 2446(6)  | 9969(7)   | 3293(4)  | 69(2)  |
| C(5)   | 3234(8)  | 10677(7)  | 2164(5)  | 59(1)  |
| C(6)   | 3449(5)  | 10026(6)  | 1444(5)  | 49(1)  |
| N(1B)  | 2160(20) | 9400(20)  | 1498(9)  | 40(3)  |
| C(1B)  | 1409(18) | 8415(16)  | 2428(12) | 47(3)  |
| C(2B)  | 1381(17) | 8417(12)  | 3474(10) | 57(3)  |
| C(3B)  | 1474(18) | 9579(15)  | 3562(15) | 63(3)  |
| C(4B)  | 2600(20) | 10350(20) | 3123(16) | 64(3)  |
| C(5B)  | 3220(30) | 10740(20) | 1950(16) | 59(4)  |
| C(6B)  | 3290(18) | 9770(20)  | 1544(17) | 50(3)  |
| C(7)   | 1380(2)  | 12156(3)  | 179(2)   | 46(1)  |
| C(8)   | 3238(2)  | 12050(2)  | -1095(2) | 37(1)  |
| C(9)   | 3883(3)  | 12852(2)  | -916(2)  | 46(1)  |
| C(10)  | 4881(3)  | 13476(2)  | -1644(2) | 49(1)  |
| C(11)  | 5311(2)  | 13330(2)  | -2599(2) | 45(1)  |
| C(12)  | 6366(3)  | 13967(3)  | -3357(3) | 57(1)  |
| C(13)  | 6795(3)  | 13801(3)  | -4257(3) | 64(1)  |
| C(14)  | 6197(3)  | 12964(3)  | -4425(3) | 58(1)  |

|       |         |          |          |       |
|-------|---------|----------|----------|-------|
| C(15) | 5182(2) | 12320(3) | -3708(2) | 48(1) |
| C(16) | 4681(2) | 12501(2) | -2773(2) | 40(1) |
| C(17) | 3595(2) | 11872(2) | -2011(2) | 36(1) |
| C(18) | 2926(2) | 11009(2) | -2191(2) | 33(1) |
| C(19) | 2558(2) | 11330(2) | -3104(2) | 35(1) |
| C(20) | 2624(3) | 12522(2) | -3821(2) | 45(1) |
| C(21) | 2298(3) | 12791(3) | -4697(2) | 55(1) |
| C(22) | 1900(3) | 11872(3) | -4921(2) | 56(1) |
| C(23) | 1797(3) | 10730(3) | -4245(2) | 50(1) |
| C(24) | 2092(2) | 10422(2) | -3307(2) | 40(1) |
| C(25) | 1916(2) | 9237(2)  | -2565(2) | 42(1) |
| C(26) | 2173(2) | 8948(2)  | -1655(2) | 39(1) |
| C(27) | 2680(2) | 9845(2)  | -1476(2) | 33(1) |
| C(28) | 3479(2) | 8429(2)  | -109(2)  | 42(1) |

---

**Table S3.** Bond lengths [ $\text{\AA}$ ] and angles [ $^\circ$ ] for *bcl1tasq*.

---

|               |          |
|---------------|----------|
| Sb(1)-Cl(4)   | 2.350(4) |
| Sb(1)-Cl(2)   | 2.352(4) |
| Sb(1)-Cl(5)   | 2.356(4) |
| Sb(1)-Cl(3)   | 2.357(4) |
| Sb(1)-Cl(6)   | 2.358(4) |
| Sb(1)-Cl(1)   | 2.366(5) |
| Sb(1B)-Cl(3B) | 2.342(7) |
| Sb(1B)-Cl(2B) | 2.348(7) |
| Sb(1B)-Cl(1B) | 2.350(7) |
| Sb(1B)-Cl(4B) | 2.353(7) |
| Sb(1B)-Cl(5B) | 2.354(7) |
| Sb(1B)-Cl(6B) | 2.363(7) |
| Sb(1C)-Cl(2C) | 2.340(5) |
| Sb(1C)-Cl(4C) | 2.341(5) |
| Sb(1C)-Cl(5C) | 2.354(5) |
| Sb(1C)-Cl(3C) | 2.356(5) |
| Sb(1C)-Cl(1C) | 2.364(4) |
| Sb(1C)-Cl(6C) | 2.369(5) |



|               |           |
|---------------|-----------|
| Se(1)-P(1)    | 2.2441(6) |
| Se(1)-Se(1)#1 | 2.3728(5) |
| P(1)-N(1)     | 1.619(3)  |
| P(1)-N(1B)    | 1.621(8)  |
| P(1)-N(2)     | 1.633(2)  |
| P(1)-N(3)     | 1.638(2)  |
| N(2)-C(8)     | 1.445(3)  |
| N(2)-C(7)     | 1.483(3)  |
| N(3)-C(27)    | 1.440(3)  |
| N(3)-C(28)    | 1.475(3)  |
| N(1)-C(6)     | 1.472(5)  |
| N(1)-C(1)     | 1.480(5)  |
| C(1)-C(2)     | 1.527(6)  |
| C(1)-H(1A)    | 0.9900    |
| C(1)-H(1B)    | 0.9900    |
| C(2)-C(3)     | 1.507(7)  |
| C(2)-H(2A)    | 0.9900    |
| C(2)-H(2B)    | 0.9900    |
| C(3)-C(4)     | 1.500(8)  |
| C(3)-H(3A)    | 0.9900    |
| C(3)-H(3B)    | 0.9900    |
| C(4)-C(5)     | 1.544(6)  |
| C(4)-H(4A)    | 0.9900    |
| C(4)-H(4B)    | 0.9900    |
| C(5)-C(6)     | 1.515(6)  |
| C(5)-H(5A)    | 0.9900    |
| C(5)-H(5B)    | 0.9900    |
| C(6)-H(6A)    | 0.9900    |
| C(6)-H(6B)    | 0.9900    |
| N(1B)-C(6B)   | 1.466(10) |
| N(1B)-C(1B)   | 1.477(9)  |
| C(1B)-C(2B)   | 1.517(10) |
| C(1B)-H(1C)   | 0.9900    |
| C(1B)-H(1D)   | 0.9900    |
| C(2B)-C(3B)   | 1.491(10) |
| C(2B)-H(2C)   | 0.9900    |

|              |           |
|--------------|-----------|
| C(2B)-H(2D)  | 0.9900    |
| C(3B)-C(4B)  | 1.487(11) |
| C(3B)-H(3C)  | 0.9900    |
| C(3B)-H(3D)  | 0.9900    |
| C(4B)-C(5B)  | 1.535(10) |
| C(4B)-H(4C)  | 0.9900    |
| C(4B)-H(4D)  | 0.9900    |
| C(5B)-C(6B)  | 1.517(10) |
| C(5B)-H(5C)  | 0.9900    |
| C(5B)-H(5D)  | 0.9900    |
| C(6B)-H(6C)  | 0.9900    |
| C(6B)-H(6D)  | 0.9900    |
| C(7)-H(7A)   | 0.9800    |
| C(7)-H(7B)   | 0.9800    |
| C(7)-H(7C)   | 0.9800    |
| C(8)-C(17)   | 1.381(4)  |
| C(8)-C(9)    | 1.411(4)  |
| C(9)-C(10)   | 1.350(4)  |
| C(9)-H(9A)   | 0.9500    |
| C(10)-C(11)  | 1.419(4)  |
| C(10)-H(10A) | 0.9500    |
| C(11)-C(12)  | 1.415(4)  |
| C(11)-C(16)  | 1.421(4)  |
| C(12)-C(13)  | 1.358(5)  |
| C(12)-H(12A) | 0.9500    |
| C(13)-C(14)  | 1.400(5)  |
| C(13)-H(13A) | 0.9500    |
| C(14)-C(15)  | 1.367(4)  |
| C(14)-H(14A) | 0.9500    |
| C(15)-C(16)  | 1.423(4)  |
| C(15)-H(15A) | 0.9500    |
| C(16)-C(17)  | 1.439(4)  |
| C(17)-C(18)  | 1.488(3)  |
| C(18)-C(27)  | 1.377(3)  |
| C(18)-C(19)  | 1.431(4)  |
| C(19)-C(20)  | 1.417(4)  |

|                      |          |
|----------------------|----------|
| C(19)-C(24)          | 1.423(4) |
| C(20)-C(21)          | 1.360(4) |
| C(20)-H(20A)         | 0.9500   |
| C(21)-C(22)          | 1.417(5) |
| C(21)-H(21A)         | 0.9500   |
| C(22)-C(23)          | 1.347(5) |
| C(22)-H(22A)         | 0.9500   |
| C(23)-C(24)          | 1.417(4) |
| C(23)-H(23A)         | 0.9500   |
| C(24)-C(25)          | 1.409(4) |
| C(25)-C(26)          | 1.358(4) |
| C(25)-H(25A)         | 0.9500   |
| C(26)-C(27)          | 1.414(4) |
| C(26)-H(26A)         | 0.9500   |
| C(28)-H(28A)         | 0.9800   |
| C(28)-H(28B)         | 0.9800   |
| C(28)-H(28C)         | 0.9800   |
|                      |          |
| Cl(4)-Sb(1)-Cl(2)    | 179.7(3) |
| Cl(4)-Sb(1)-Cl(5)    | 89.3(2)  |
| Cl(2)-Sb(1)-Cl(5)    | 90.4(2)  |
| Cl(4)-Sb(1)-Cl(3)    | 90.4(2)  |
| Cl(2)-Sb(1)-Cl(3)    | 89.7(2)  |
| Cl(5)-Sb(1)-Cl(3)    | 90.4(2)  |
| Cl(4)-Sb(1)-Cl(6)    | 90.4(3)  |
| Cl(2)-Sb(1)-Cl(6)    | 89.8(2)  |
| Cl(5)-Sb(1)-Cl(6)    | 179.5(3) |
| Cl(3)-Sb(1)-Cl(6)    | 90.0(3)  |
| Cl(4)-Sb(1)-Cl(1)    | 90.7(3)  |
| Cl(2)-Sb(1)-Cl(1)    | 89.2(3)  |
| Cl(5)-Sb(1)-Cl(1)    | 89.6(3)  |
| Cl(3)-Sb(1)-Cl(1)    | 178.8(3) |
| Cl(6)-Sb(1)-Cl(1)    | 89.9(3)  |
| Cl(3B)-Sb(1B)-Cl(2B) | 89.7(5)  |
| Cl(3B)-Sb(1B)-Cl(1B) | 179.3(5) |
| Cl(2B)-Sb(1B)-Cl(1B) | 90.8(5)  |

|                      |            |
|----------------------|------------|
| Cl(3B)-Sb(1B)-Cl(4B) | 89.2(5)    |
| Cl(2B)-Sb(1B)-Cl(4B) | 178.6(6)   |
| Cl(1B)-Sb(1B)-Cl(4B) | 90.3(4)    |
| Cl(3B)-Sb(1B)-Cl(5B) | 91.5(5)    |
| Cl(2B)-Sb(1B)-Cl(5B) | 89.2(5)    |
| Cl(1B)-Sb(1B)-Cl(5B) | 89.0(4)    |
| Cl(4B)-Sb(1B)-Cl(5B) | 89.9(5)    |
| Cl(3B)-Sb(1B)-Cl(6B) | 88.9(5)    |
| Cl(2B)-Sb(1B)-Cl(6B) | 90.5(5)    |
| Cl(1B)-Sb(1B)-Cl(6B) | 90.7(5)    |
| Cl(4B)-Sb(1B)-Cl(6B) | 90.4(5)    |
| Cl(5B)-Sb(1B)-Cl(6B) | 179.5(5)   |
| Cl(2C)-Sb(1C)-Cl(4C) | 179.3(3)   |
| Cl(2C)-Sb(1C)-Cl(5C) | 90.5(3)    |
| Cl(4C)-Sb(1C)-Cl(5C) | 89.9(3)    |
| Cl(2C)-Sb(1C)-Cl(3C) | 90.6(2)    |
| Cl(4C)-Sb(1C)-Cl(3C) | 90.0(3)    |
| Cl(5C)-Sb(1C)-Cl(3C) | 91.5(3)    |
| Cl(2C)-Sb(1C)-Cl(1C) | 89.7(2)    |
| Cl(4C)-Sb(1C)-Cl(1C) | 89.8(2)    |
| Cl(5C)-Sb(1C)-Cl(1C) | 90.6(2)    |
| Cl(3C)-Sb(1C)-Cl(1C) | 177.9(3)   |
| Cl(2C)-Sb(1C)-Cl(6C) | 89.1(3)    |
| Cl(4C)-Sb(1C)-Cl(6C) | 90.5(3)    |
| Cl(5C)-Sb(1C)-Cl(6C) | 179.4(3)   |
| Cl(3C)-Sb(1C)-Cl(6C) | 88.9(3)    |
| Cl(1C)-Sb(1C)-Cl(6C) | 89.1(3)    |
| P(1)-Se(1)-Se(1)#1   | 94.31(2)   |
| N(1)-P(1)-N(2)       | 114.4(3)   |
| N(1B)-P(1)-N(2)      | 119.9(10)  |
| N(1)-P(1)-N(3)       | 109.8(3)   |
| N(1B)-P(1)-N(3)      | 113.4(12)  |
| N(2)-P(1)-N(3)       | 104.41(10) |
| N(1)-P(1)-Se(1)      | 105.4(2)   |
| N(1B)-P(1)-Se(1)     | 96.3(8)    |
| N(2)-P(1)-Se(1)      | 108.04(8)  |

|                  |            |
|------------------|------------|
| N(3)-P(1)-Se(1)  | 115.08(8)  |
| C(8)-N(2)-C(7)   | 116.9(2)   |
| C(8)-N(2)-P(1)   | 120.66(17) |
| C(7)-N(2)-P(1)   | 119.75(18) |
| C(27)-N(3)-C(28) | 117.9(2)   |
| C(27)-N(3)-P(1)  | 115.13(16) |
| C(28)-N(3)-P(1)  | 120.11(17) |
| C(6)-N(1)-C(1)   | 115.8(4)   |
| C(6)-N(1)-P(1)   | 120.2(4)   |
| C(1)-N(1)-P(1)   | 122.1(4)   |
| N(1)-C(1)-C(2)   | 113.3(5)   |
| N(1)-C(1)-H(1A)  | 108.9      |
| C(2)-C(1)-H(1A)  | 108.9      |
| N(1)-C(1)-H(1B)  | 108.9      |
| C(2)-C(1)-H(1B)  | 108.9      |
| H(1A)-C(1)-H(1B) | 107.7      |
| C(3)-C(2)-C(1)   | 116.4(4)   |
| C(3)-C(2)-H(2A)  | 108.2      |
| C(1)-C(2)-H(2A)  | 108.2      |
| C(3)-C(2)-H(2B)  | 108.2      |
| C(1)-C(2)-H(2B)  | 108.2      |
| H(2A)-C(2)-H(2B) | 107.3      |
| C(4)-C(3)-C(2)   | 117.3(5)   |
| C(4)-C(3)-H(3A)  | 108.0      |
| C(2)-C(3)-H(3A)  | 108.0      |
| C(4)-C(3)-H(3B)  | 108.0      |
| C(2)-C(3)-H(3B)  | 108.0      |
| H(3A)-C(3)-H(3B) | 107.2      |
| C(3)-C(4)-C(5)   | 114.2(5)   |
| C(3)-C(4)-H(4A)  | 108.7      |
| C(5)-C(4)-H(4A)  | 108.7      |
| C(3)-C(4)-H(4B)  | 108.7      |
| C(5)-C(4)-H(4B)  | 108.7      |
| H(4A)-C(4)-H(4B) | 107.6      |
| C(6)-C(5)-C(4)   | 115.7(5)   |
| C(6)-C(5)-H(5A)  | 108.4      |

|                   |           |
|-------------------|-----------|
| C(4)-C(5)-H(5A)   | 108.4     |
| C(6)-C(5)-H(5B)   | 108.4     |
| C(4)-C(5)-H(5B)   | 108.4     |
| H(5A)-C(5)-H(5B)  | 107.4     |
| N(1)-C(6)-C(5)    | 113.3(4)  |
| N(1)-C(6)-H(6A)   | 108.9     |
| C(5)-C(6)-H(6A)   | 108.9     |
| N(1)-C(6)-H(6B)   | 108.9     |
| C(5)-C(6)-H(6B)   | 108.9     |
| H(6A)-C(6)-H(6B)  | 107.7     |
| C(6B)-N(1B)-C(1B) | 117.8(10) |
| C(6B)-N(1B)-P(1)  | 113.0(15) |
| C(1B)-N(1B)-P(1)  | 128.2(13) |
| N(1B)-C(1B)-C(2B) | 115.6(10) |
| N(1B)-C(1B)-H(1C) | 108.4     |
| C(2B)-C(1B)-H(1C) | 108.4     |
| N(1B)-C(1B)-H(1D) | 108.4     |
| C(2B)-C(1B)-H(1D) | 108.4     |
| H(1C)-C(1B)-H(1D) | 107.4     |
| C(3B)-C(2B)-C(1B) | 118.8(11) |
| C(3B)-C(2B)-H(2C) | 107.6     |
| C(1B)-C(2B)-H(2C) | 107.6     |
| C(3B)-C(2B)-H(2D) | 107.6     |
| C(1B)-C(2B)-H(2D) | 107.6     |
| H(2C)-C(2B)-H(2D) | 107.0     |
| C(4B)-C(3B)-C(2B) | 122.3(13) |
| C(4B)-C(3B)-H(3C) | 106.8     |
| C(2B)-C(3B)-H(3C) | 106.8     |
| C(4B)-C(3B)-H(3D) | 106.8     |
| C(2B)-C(3B)-H(3D) | 106.8     |
| H(3C)-C(3B)-H(3D) | 106.6     |
| C(3B)-C(4B)-C(5B) | 117.2(12) |
| C(3B)-C(4B)-H(4C) | 108.0     |
| C(5B)-C(4B)-H(4C) | 108.0     |
| C(3B)-C(4B)-H(4D) | 108.0     |
| C(5B)-C(4B)-H(4D) | 108.0     |

|                    |           |
|--------------------|-----------|
| H(4C)-C(4B)-H(4D)  | 107.2     |
| C(6B)-C(5B)-C(4B)  | 115.2(13) |
| C(6B)-C(5B)-H(5C)  | 108.5     |
| C(4B)-C(5B)-H(5C)  | 108.5     |
| C(6B)-C(5B)-H(5D)  | 108.5     |
| C(4B)-C(5B)-H(5D)  | 108.5     |
| H(5C)-C(5B)-H(5D)  | 107.5     |
| N(1B)-C(6B)-C(5B)  | 113.3(13) |
| N(1B)-C(6B)-H(6C)  | 108.9     |
| C(5B)-C(6B)-H(6C)  | 108.9     |
| N(1B)-C(6B)-H(6D)  | 108.9     |
| C(5B)-C(6B)-H(6D)  | 108.9     |
| H(6C)-C(6B)-H(6D)  | 107.7     |
| N(2)-C(7)-H(7A)    | 109.5     |
| N(2)-C(7)-H(7B)    | 109.5     |
| H(7A)-C(7)-H(7B)   | 109.5     |
| N(2)-C(7)-H(7C)    | 109.5     |
| H(7A)-C(7)-H(7C)   | 109.5     |
| H(7B)-C(7)-H(7C)   | 109.5     |
| C(17)-C(8)-C(9)    | 121.7(2)  |
| C(17)-C(8)-N(2)    | 121.0(2)  |
| C(9)-C(8)-N(2)     | 117.2(2)  |
| C(10)-C(9)-C(8)    | 120.6(3)  |
| C(10)-C(9)-H(9A)   | 119.7     |
| C(8)-C(9)-H(9A)    | 119.7     |
| C(9)-C(10)-C(11)   | 120.8(3)  |
| C(9)-C(10)-H(10A)  | 119.6     |
| C(11)-C(10)-H(10A) | 119.6     |
| C(12)-C(11)-C(10)  | 121.0(3)  |
| C(12)-C(11)-C(16)  | 120.1(3)  |
| C(10)-C(11)-C(16)  | 118.9(2)  |
| C(13)-C(12)-C(11)  | 121.1(3)  |
| C(13)-C(12)-H(12A) | 119.5     |
| C(11)-C(12)-H(12A) | 119.5     |
| C(12)-C(13)-C(14)  | 119.4(3)  |
| C(12)-C(13)-H(13A) | 120.3     |

|                    |          |
|--------------------|----------|
| C(14)-C(13)-H(13A) | 120.3    |
| C(15)-C(14)-C(13)  | 121.4(3) |
| C(15)-C(14)-H(14A) | 119.3    |
| C(13)-C(14)-H(14A) | 119.3    |
| C(14)-C(15)-C(16)  | 120.9(3) |
| C(14)-C(15)-H(15A) | 119.6    |
| C(16)-C(15)-H(15A) | 119.6    |
| C(11)-C(16)-C(15)  | 117.1(2) |
| C(11)-C(16)-C(17)  | 119.9(2) |
| C(15)-C(16)-C(17)  | 123.0(2) |
| C(8)-C(17)-C(16)   | 117.9(2) |
| C(8)-C(17)-C(18)   | 121.7(2) |
| C(16)-C(17)-C(18)  | 120.2(2) |
| C(27)-C(18)-C(19)  | 118.1(2) |
| C(27)-C(18)-C(17)  | 119.5(2) |
| C(19)-C(18)-C(17)  | 122.4(2) |
| C(20)-C(19)-C(24)  | 117.9(2) |
| C(20)-C(19)-C(18)  | 123.0(2) |
| C(24)-C(19)-C(18)  | 119.1(2) |
| C(21)-C(20)-C(19)  | 121.3(3) |
| C(21)-C(20)-H(20A) | 119.4    |
| C(19)-C(20)-H(20A) | 119.4    |
| C(20)-C(21)-C(22)  | 120.2(3) |
| C(20)-C(21)-H(21A) | 119.9    |
| C(22)-C(21)-H(21A) | 119.9    |
| C(23)-C(22)-C(21)  | 120.1(3) |
| C(23)-C(22)-H(22A) | 119.9    |
| C(21)-C(22)-H(22A) | 119.9    |
| C(22)-C(23)-C(24)  | 121.1(3) |
| C(22)-C(23)-H(23A) | 119.5    |
| C(24)-C(23)-H(23A) | 119.5    |
| C(25)-C(24)-C(23)  | 121.3(2) |
| C(25)-C(24)-C(19)  | 119.5(2) |
| C(23)-C(24)-C(19)  | 119.2(3) |
| C(26)-C(25)-C(24)  | 121.3(2) |
| C(26)-C(25)-H(25A) | 119.4    |



|                     |          |
|---------------------|----------|
| C(24)-C(25)-H(25A)  | 119.4    |
| C(25)-C(26)-C(27)   | 119.1(2) |
| C(25)-C(26)-H(26A)  | 120.4    |
| C(27)-C(26)-H(26A)  | 120.4    |
| C(18)-C(27)-C(26)   | 122.5(2) |
| C(18)-C(27)-N(3)    | 119.1(2) |
| C(26)-C(27)-N(3)    | 118.4(2) |
| N(3)-C(28)-H(28A)   | 109.5    |
| N(3)-C(28)-H(28B)   | 109.5    |
| H(28A)-C(28)-H(28B) | 109.5    |
| N(3)-C(28)-H(28C)   | 109.5    |
| H(28A)-C(28)-H(28C) | 109.5    |
| H(28B)-C(28)-H(28C) | 109.5    |

Symmetry transformations used to generate equivalent atoms:

#1 -x,-y+2,-z

**Table S4.** Anisotropic displacement parameters ( $\text{\AA}^2 \times 10^3$ ) for bc11tasq. The anisotropic displacement factor exponent takes the form:  $-2p^2 [ h^2 a^* 2U^{11} + \dots + 2 h k a^* b^* U^{12} ]$

|        | U <sup>11</sup> | U <sup>22</sup> | U <sup>33</sup> | U <sup>23</sup> | U <sup>13</sup> | U <sup>12</sup> |
|--------|-----------------|-----------------|-----------------|-----------------|-----------------|-----------------|
| Sb(1)  | 48(1)           | 36(1)           | 27(1)           | -13(1)          | -9(1)           | 7(1)            |
| Cl(1)  | 65(3)           | 137(5)          | 66(2)           | -15(3)          | -7(2)           | 49(3)           |
| Cl(2)  | 99(4)           | 33(2)           | 32(2)           | -14(1)          | -13(2)          | -2(2)           |
| Cl(3)  | 65(2)           | 87(2)           | 72(2)           | -47(2)          | -24(2)          | 36(2)           |
| Cl(4)  | 85(3)           | 99(3)           | 52(2)           | -41(1)          | -24(2)          | -16(2)          |
| Cl(5)  | 80(4)           | 48(2)           | 29(1)           | -12(1)          | -1(2)           | -13(2)          |
| Cl(6)  | 95(3)           | 40(2)           | 49(2)           | 1(1)            | -29(2)          | -21(1)          |
| Sb(1B) | 46(4)           | 33(2)           | 38(3)           | -14(2)          | 3(2)            | -20(2)          |
| Cl(1B) | 94(5)           | 98(6)           | 73(5)           | -58(4)          | -22(4)          | 38(5)           |
| Cl(2B) | 98(8)           | 59(8)           | 43(5)           | -20(4)          | -30(5)          | -3(6)           |
| Cl(3B) | 122(7)          | 95(6)           | 102(6)          | -36(5)          | -50(5)          | 57(5)           |
| Cl(4B) | 90(7)           | 87(8)           | 104(7)          | -56(5)          | -43(5)          | 3(5)            |
| Cl(5B) | 72(5)           | 97(7)           | 55(4)           | -28(5)          | 1(4)            | -2(5)           |
| Cl(6B) | 123(7)          | 81(6)           | 101(6)          | -26(5)          | 11(5)           | -27(5)          |

|        |        |        |       |        |        |        |
|--------|--------|--------|-------|--------|--------|--------|
| Sb(1C) | 45(1)  | 34(1)  | 31(1) | -13(1) | -10(1) | 3(1)   |
| Cl(1C) | 45(2)  | 82(2)  | 62(2) | -16(1) | -5(2)  | 12(2)  |
| Cl(2C) | 61(2)  | 67(3)  | 41(2) | -36(2) | -11(1) | 13(2)  |
| Cl(3C) | 74(3)  | 129(4) | 73(2) | -65(2) | -33(2) | 59(3)  |
| Cl(4C) | 82(4)  | 76(3)  | 63(2) | -33(1) | -36(2) | -6(2)  |
| Cl(5C) | 67(3)  | 58(2)  | 39(1) | 0(1)   | -10(1) | -21(1) |
| Cl(6C) | 109(4) | 46(2)  | 61(2) | -10(2) | -12(2) | -19(2) |
| Se(1)  | 38(1)  | 44(1)  | 33(1) | -7(1)  | -8(1)  | -1(1)  |
| P(1)   | 36(1)  | 35(1)  | 30(1) | -15(1) | -9(1)  | 4(1)   |
| N(2)   | 41(1)  | 36(1)  | 36(1) | -20(1) | -8(1)  | 6(1)   |
| N(3)   | 39(1)  | 31(1)  | 33(1) | -13(1) | -9(1)  | 5(1)   |
| N(1)   | 40(3)  | 47(2)  | 32(2) | -15(2) | -12(1) | 2(2)   |
| C(1)   | 49(3)  | 53(2)  | 35(2) | -12(2) | -15(2) | 4(2)   |
| C(2)   | 57(2)  | 77(3)  | 34(2) | -17(2) | -6(2)  | -7(2)  |
| C(3)   | 57(3)  | 89(3)  | 47(3) | -34(2) | -3(2)  | -1(2)  |
| C(4)   | 72(3)  | 92(4)  | 50(3) | -38(3) | -15(2) | -5(3)  |
| C(5)   | 65(2)  | 74(3)  | 45(3) | -31(2) | -15(2) | -14(2) |
| C(6)   | 41(2)  | 65(3)  | 47(2) | -23(2) | -18(2) | -1(2)  |
| N(1B)  | 39(5)  | 49(5)  | 38(4) | -22(4) | -18(4) | 0(4)   |
| C(1B)  | 51(6)  | 54(5)  | 35(4) | -12(4) | -21(4) | -4(5)  |
| C(2B)  | 56(5)  | 70(4)  | 40(4) | -17(4) | -14(4) | -2(4)  |
| C(3B)  | 66(5)  | 84(5)  | 42(4) | -31(4) | -10(4) | -9(4)  |
| C(4B)  | 64(5)  | 79(5)  | 52(5) | -36(5) | -9(4)  | -13(5) |
| C(5B)  | 56(5)  | 75(5)  | 46(5) | -26(5) | -12(5) | -11(4) |
| C(6B)  | 50(5)  | 59(5)  | 42(4) | -23(4) | -11(4) | 0(4)   |
| C(7)   | 52(1)  | 46(2)  | 47(2) | -30(1) | -10(1) | 12(1)  |
| C(8)   | 42(1)  | 30(1)  | 38(1) | -15(1) | -11(1) | 4(1)   |
| C(9)   | 58(2)  | 38(1)  | 47(2) | -24(1) | -16(1) | 3(1)   |
| C(10)  | 57(2)  | 37(1)  | 58(2) | -25(1) | -18(1) | -4(1)  |
| C(11)  | 50(1)  | 34(1)  | 50(2) | -16(1) | -12(1) | -1(1)  |
| C(12)  | 56(2)  | 42(2)  | 60(2) | -15(1) | -7(1)  | -13(1) |
| C(13)  | 58(2)  | 55(2)  | 59(2) | -17(2) | 2(1)   | -16(1) |
| C(14)  | 56(2)  | 59(2)  | 49(2) | -22(1) | 2(1)   | -9(1)  |
| C(15)  | 51(1)  | 45(2)  | 43(2) | -21(1) | -5(1)  | -3(1)  |
| C(16)  | 44(1)  | 32(1)  | 41(1) | -14(1) | -10(1) | 1(1)   |
| C(17)  | 42(1)  | 30(1)  | 37(1) | -16(1) | -12(1) | 4(1)   |

|       |       |       |       |        |        |       |
|-------|-------|-------|-------|--------|--------|-------|
| C(18) | 35(1) | 32(1) | 31(1) | -17(1) | -4(1)  | 2(1)  |
| C(19) | 38(1) | 35(1) | 32(1) | -16(1) | -6(1)  | 4(1)  |
| C(20) | 58(2) | 37(1) | 40(1) | -15(1) | -13(1) | 4(1)  |
| C(21) | 71(2) | 46(2) | 43(2) | -9(1)  | -21(1) | 6(1)  |
| C(22) | 71(2) | 61(2) | 35(1) | -17(1) | -19(1) | 5(2)  |
| C(23) | 58(2) | 56(2) | 39(1) | -25(1) | -13(1) | -2(1) |
| C(24) | 42(1) | 43(1) | 35(1) | -20(1) | -5(1)  | 0(1)  |
| C(25) | 52(1) | 38(1) | 39(1) | -22(1) | -9(1)  | -4(1) |
| C(26) | 46(1) | 31(1) | 37(1) | -14(1) | -7(1)  | -1(1) |
| C(27) | 35(1) | 32(1) | 32(1) | -16(1) | -6(1)  | 5(1)  |
| C(28) | 42(1) | 36(1) | 45(1) | -14(1) | -10(1) | 10(1) |

**Table S5.** Hydrogen coordinates ( $\times 10^4$ ) and isotropic displacement parameters ( $\text{\AA}^2 \times 10^{-3}$ ) for bc11tasq.

|       | x    | y     | z    | U(eq) |
|-------|------|-------|------|-------|
| H(1A) | 2413 | 7939  | 2565 | 56    |
| H(1B) | 1393 | 7929  | 2065 | 56    |
| H(2A) | 151  | 8648  | 3091 | 71    |
| H(2B) | 858  | 7892  | 3862 | 71    |
| H(3A) | 967  | 10381 | 2865 | 78    |
| H(3B) | 706  | 9592  | 4083 | 78    |
| H(4A) | 2781 | 9215  | 3596 | 83    |
| H(4B) | 2455 | 10432 | 3715 | 83    |
| H(5A) | 2875 | 11410 | 1854 | 71    |
| H(5B) | 3999 | 10920 | 2194 | 71    |
| H(6A) | 3893 | 10583 | 729  | 59    |
| H(6B) | 3937 | 9375  | 1678 | 59    |
| H(1C) | 1678 | 7655  | 2406 | 56    |
| H(1D) | 601  | 8442  | 2383 | 56    |
| H(2C) | 642  | 7962  | 3993 | 68    |
| H(2D) | 2027 | 7974  | 3684 | 68    |
| H(3C) | 910  | 10065 | 3242 | 76    |

|        |      |       |       |    |
|--------|------|-------|-------|----|
| H(3D)  | 1190 | 9414  | 4317  | 76 |
| H(4C)  | 3140 | 9921  | 3508  | 76 |
| H(4D)  | 2447 | 11072 | 3268  | 76 |
| H(5C)  | 2816 | 11387 | 1559  | 71 |
| H(5D)  | 4029 | 11082 | 1798  | 71 |
| H(6C)  | 3859 | 10060 | 835   | 60 |
| H(6D)  | 3583 | 9075  | 2002  | 60 |
| H(7A)  | 1248 | 12863 | -381  | 69 |
| H(7B)  | 1740 | 12399 | 602   | 69 |
| H(7C)  | 631  | 11682 | 621   | 69 |
| H(9A)  | 3614 | 12955 | -278  | 55 |
| H(10A) | 5301 | 14019 | -1515 | 58 |
| H(12A) | 6781 | 14519 | -3233 | 68 |
| H(13A) | 7493 | 14249 | -4769 | 76 |
| H(14A) | 6503 | 12842 | -5052 | 70 |
| H(15A) | 4807 | 11744 | -3835 | 57 |
| H(20A) | 2902 | 13146 | -3687 | 55 |
| H(21A) | 2336 | 13598 | -5161 | 66 |
| H(22A) | 1706 | 12062 | -5550 | 67 |
| H(23A) | 1522 | 10122 | -4399 | 60 |
| H(25A) | 1612 | 8630  | -2704 | 50 |
| H(26A) | 2015 | 8153  | -1146 | 47 |
| H(28A) | 4019 | 8311  | -703  | 63 |
| H(28B) | 2877 | 7751  | 285   | 63 |
| H(28C) | 3912 | 8493  | 347   | 63 |

---

**Table S6.** Torsion angles [°] for bc11tasq.

|                          |           |
|--------------------------|-----------|
| Se(1)#1-Se(1)-P(1)-N(1)  | 162.8(3)  |
| Se(1)#1-Se(1)-P(1)-N(1B) | 164.4(12) |
| Se(1)#1-Se(1)-P(1)-N(2)  | 40.12(8)  |
| Se(1)#1-Se(1)-P(1)-N(3)  | -76.06(8) |
| N(1)-P(1)-N(2)-C(8)      | 93.6(3)   |
| N(1B)-P(1)-N(2)-C(8)     | 102.0(12) |
| N(3)-P(1)-N(2)-C(8)      | -26.4(2)  |

|                        |             |
|------------------------|-------------|
| Se(1)-P(1)-N(2)-C(8)   | -149.36(17) |
| N(1)-P(1)-N(2)-C(7)    | -67.3(4)    |
| N(1B)-P(1)-N(2)-C(7)   | -58.9(12)   |
| N(3)-P(1)-N(2)-C(7)    | 172.7(2)    |
| Se(1)-P(1)-N(2)-C(7)   | 49.7(2)     |
| N(1)-P(1)-N(3)-C(27)   | 177.5(3)    |
| N(1B)-P(1)-N(3)-C(27)  | 168.4(8)    |
| N(2)-P(1)-N(3)-C(27)   | -59.39(18)  |
| Se(1)-P(1)-N(3)-C(27)  | 58.85(17)   |
| N(1)-P(1)-N(3)-C(28)   | 27.2(3)     |
| N(1B)-P(1)-N(3)-C(28)  | 18.1(8)     |
| N(2)-P(1)-N(3)-C(28)   | 150.26(18)  |
| Se(1)-P(1)-N(3)-C(28)  | -91.49(18)  |
| N(1B)-P(1)-N(1)-C(6)   | -175(10)    |
| N(2)-P(1)-N(1)-C(6)    | -46.5(7)    |
| N(3)-P(1)-N(1)-C(6)    | 70.4(7)     |
| Se(1)-P(1)-N(1)-C(6)   | -165.1(5)   |
| N(1B)-P(1)-N(1)-C(1)   | 21(9)       |
| N(2)-P(1)-N(1)-C(1)    | 149.6(5)    |
| N(3)-P(1)-N(1)-C(1)    | -93.4(6)    |
| Se(1)-P(1)-N(1)-C(1)   | 31.1(7)     |
| C(6)-N(1)-C(1)-C(2)    | 89.3(7)     |
| P(1)-N(1)-C(1)-C(2)    | -106.2(8)   |
| N(1)-C(1)-C(2)-C(3)    | -33.0(8)    |
| C(1)-C(2)-C(3)-C(4)    | -42.3(7)    |
| C(2)-C(3)-C(4)-C(5)    | 84.0(8)     |
| C(3)-C(4)-C(5)-C(6)    | -66.2(9)    |
| C(1)-N(1)-C(6)-C(5)    | -78.5(7)    |
| P(1)-N(1)-C(6)-C(5)    | 116.7(8)    |
| C(4)-C(5)-C(6)-N(1)    | 52.9(8)     |
| N(1)-P(1)-N(1B)-C(6B)  | -2(8)       |
| N(2)-P(1)-N(1B)-C(6B)  | -57(2)      |
| N(3)-P(1)-N(1B)-C(6B)  | 66.9(19)    |
| Se(1)-P(1)-N(1B)-C(6B) | -172.2(17)  |
| N(1)-P(1)-N(1B)-C(1B)  | -170(12)    |
| N(2)-P(1)-N(1B)-C(1B)  | 135(2)      |

|                         |           |
|-------------------------|-----------|
| N(3)-P(1)-N(1B)-C(1B)   | -101(3)   |
| Se(1)-P(1)-N(1B)-C(1B)  | 20(3)     |
| C(6B)-N(1B)-C(1B)-C(2B) | 39(3)     |
| P(1)-N(1B)-C(1B)-C(2B)  | -153(2)   |
| N(1B)-C(1B)-C(2B)-C(3B) | 34(3)     |
| C(1B)-C(2B)-C(3B)-C(4B) | -75(2)    |
| C(2B)-C(3B)-C(4B)-C(5B) | 57(3)     |
| C(3B)-C(4B)-C(5B)-C(6B) | -45(3)    |
| C(1B)-N(1B)-C(6B)-C(5B) | -90(2)    |
| P(1)-N(1B)-C(6B)-C(5B)  | 100(3)    |
| C(4B)-C(5B)-C(6B)-N(1B) | 72(3)     |
| C(7)-N(2)-C(8)-C(17)    | -133.8(3) |
| P(1)-N(2)-C(8)-C(17)    | 64.8(3)   |
| C(7)-N(2)-C(8)-C(9)     | 45.0(3)   |
| P(1)-N(2)-C(8)-C(9)     | -116.4(2) |
| C(17)-C(8)-C(9)-C(10)   | 0.0(4)    |
| N(2)-C(8)-C(9)-C(10)    | -178.8(3) |
| C(8)-C(9)-C(10)-C(11)   | -0.7(5)   |
| C(9)-C(10)-C(11)-C(12)  | -178.9(3) |
| C(9)-C(10)-C(11)-C(16)  | -0.9(4)   |
| C(10)-C(11)-C(12)-C(13) | 178.1(3)  |
| C(16)-C(11)-C(12)-C(13) | 0.0(5)    |
| C(11)-C(12)-C(13)-C(14) | -1.6(6)   |
| C(12)-C(13)-C(14)-C(15) | 0.8(6)    |
| C(13)-C(14)-C(15)-C(16) | 1.6(5)    |
| C(12)-C(11)-C(16)-C(15) | 2.3(4)    |
| C(10)-C(11)-C(16)-C(15) | -175.8(3) |
| C(12)-C(11)-C(16)-C(17) | -178.7(3) |
| C(10)-C(11)-C(16)-C(17) | 3.2(4)    |
| C(14)-C(15)-C(16)-C(11) | -3.1(4)   |
| C(14)-C(15)-C(16)-C(17) | 177.9(3)  |
| C(9)-C(8)-C(17)-C(16)   | 2.3(4)    |
| N(2)-C(8)-C(17)-C(16)   | -178.9(2) |
| C(9)-C(8)-C(17)-C(18)   | 178.8(2)  |
| N(2)-C(8)-C(17)-C(18)   | -2.4(4)   |
| C(11)-C(16)-C(17)-C(8)  | -3.9(4)   |

|                         |             |
|-------------------------|-------------|
| C(15)-C(16)-C(17)-C(8)  | 175.0(3)    |
| C(11)-C(16)-C(17)-C(18) | 179.6(2)    |
| C(15)-C(16)-C(17)-C(18) | -1.5(4)     |
| C(8)-C(17)-C(18)-C(27)  | -54.7(3)    |
| C(16)-C(17)-C(18)-C(27) | 121.7(3)    |
| C(8)-C(17)-C(18)-C(19)  | 127.5(3)    |
| C(16)-C(17)-C(18)-C(19) | -56.1(3)    |
| C(27)-C(18)-C(19)-C(20) | 171.4(2)    |
| C(17)-C(18)-C(19)-C(20) | -10.7(4)    |
| C(27)-C(18)-C(19)-C(24) | -8.0(3)     |
| C(17)-C(18)-C(19)-C(24) | 169.8(2)    |
| C(24)-C(19)-C(20)-C(21) | -2.6(4)     |
| C(18)-C(19)-C(20)-C(21) | 178.0(3)    |
| C(19)-C(20)-C(21)-C(22) | -1.1(5)     |
| C(20)-C(21)-C(22)-C(23) | 2.8(5)      |
| C(21)-C(22)-C(23)-C(24) | -0.6(5)     |
| C(22)-C(23)-C(24)-C(25) | 175.9(3)    |
| C(22)-C(23)-C(24)-C(19) | -3.1(4)     |
| C(20)-C(19)-C(24)-C(25) | -174.4(2)   |
| C(18)-C(19)-C(24)-C(25) | 5.1(3)      |
| C(20)-C(19)-C(24)-C(23) | 4.6(4)      |
| C(18)-C(19)-C(24)-C(23) | -176.0(2)   |
| C(23)-C(24)-C(25)-C(26) | -178.4(3)   |
| C(19)-C(24)-C(25)-C(26) | 0.6(4)      |
| C(24)-C(25)-C(26)-C(27) | -3.1(4)     |
| C(19)-C(18)-C(27)-C(26) | 5.6(3)      |
| C(17)-C(18)-C(27)-C(26) | -172.3(2)   |
| C(19)-C(18)-C(27)-N(3)  | -172.90(19) |
| C(17)-C(18)-C(27)-N(3)  | 9.2(3)      |
| C(25)-C(26)-C(27)-C(18) | -0.1(4)     |
| C(25)-C(26)-C(27)-N(3)  | 178.5(2)    |
| C(28)-N(3)-C(27)-C(18)  | -136.4(2)   |
| P(1)-N(3)-C(27)-C(18)   | 72.6(2)     |
| C(28)-N(3)-C(27)-C(26)  | 45.0(3)     |
| P(1)-N(3)-C(27)-C(26)   | -106.0(2)   |

---

Symmetry transformations used to generate equivalent atoms: #1 -x,-y+2,-z

**Crystallographic Data for ( $\pm$ )-**5b**<sup>+</sup>**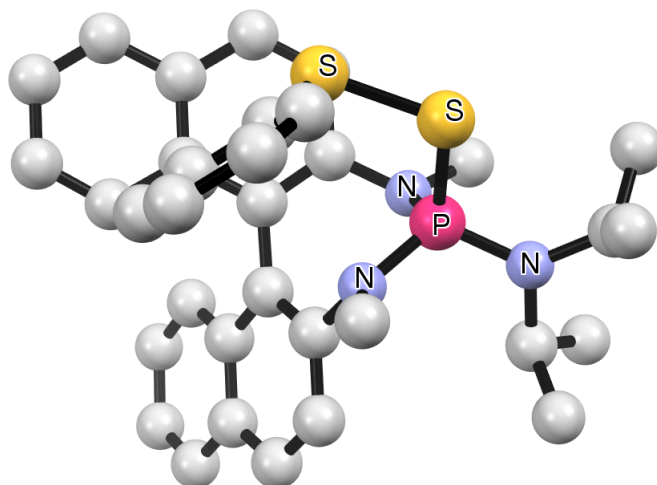

**Figure S2.** ORTEP image of the X-ray crystal structure of ( $\pm$ )-**5b**<sup>+</sup> (Hydrogens and BArF<sub>24</sub><sup>-</sup> counteranion omitted for clarity).

Crystals suitable for single crystal X-ray diffraction were obtained by dissolving ( $\pm$ )-**5b**<sup>+</sup> BArF<sub>24</sub><sup>-</sup> (120 mg) in CH<sub>2</sub>Cl<sub>2</sub> (70  $\mu$ L) followed by slow evaporation of the solvent at room temperature.

The crystallographic coordinates have been deposited with the Cambridge Crystallographic Data Centre; deposition no. 1006831. These data can be obtained free of charge via from the Cambridge Crystallographic Data Centre, 12 Union Road, Cambridge CB2 1EZ, UK; fax: (+44)1223-336-033; via [www.ccdc.cam.ac.uk/conts/retrieving.html](http://www.ccdc.cam.ac.uk/conts/retrieving.html) or [deposit@ccdc.cam.ac.uk](mailto:deposit@ccdc.cam.ac.uk).

**Table S7.** Crystal data and structure refinement for bm32zas:

|                      |                                                                                                 |                 |
|----------------------|-------------------------------------------------------------------------------------------------|-----------------|
| Identification code  | bm32zas                                                                                         |                 |
| Empirical formula    | C <sub>68</sub> H <sub>53</sub> BCl <sub>4</sub> F <sub>24</sub> N <sub>3</sub> PS <sub>2</sub> |                 |
| Formula weight       | 1615.83                                                                                         |                 |
| Temperature          | 167(2) K                                                                                        |                 |
| Wavelength           | 0.71073 Å                                                                                       |                 |
| Crystal system       | Triclinic                                                                                       |                 |
| Space group          | P-1                                                                                             |                 |
| Unit cell dimensions | a = 14.370(2) Å                                                                                 | a = 76.883(2)°. |
|                      | b = 15.135(2) Å                                                                                 | b = 70.416(2)°. |
|                      | c = 19.376(3) Å                                                                                 | g = 65.366(2)°. |



|                                   |                                             |
|-----------------------------------|---------------------------------------------|
| Volume                            | 3590.2(9) Å <sup>3</sup>                    |
| Z                                 | 2                                           |
| Density (calculated)              | 1.495 Mg/m <sup>3</sup>                     |
| Absorption coefficient            | 0.351 mm <sup>-1</sup>                      |
| F(000)                            | 1636                                        |
| Crystal size                      | 0.542 x 0.41 x 0.396 mm <sup>3</sup>        |
| Theta range for data collection   | 1.12 to 26.39°.                             |
| Index ranges                      | -17<=h<=17, -18<=k<=18, -24<=l<=24          |
| Reflections collected             | 42822                                       |
| Independent reflections           | 14547 [R(int) = 0.0441]                     |
| Completeness to theta = 26.39°    | 99.0 %                                      |
| Absorption correction             | Integration                                 |
| Max. and min. transmission        | 0.9985 and 0.9152                           |
| Refinement method                 | Full-matrix least-squares on F <sup>2</sup> |
| Data / restraints / parameters    | 14547 / 1164 / 1132                         |
| Goodness-of-fit on F <sup>2</sup> | 1.046                                       |
| Final R indices [I>2sigma(I)]     | R1 = 0.0746, wR2 = 0.2062                   |
| R indices (all data)              | R1 = 0.1075, wR2 = 0.2315                   |
| Largest diff. peak and hole       | 0.889 and -0.729 e.Å <sup>-3</sup>          |

**Table S8.** Atomic coordinates ( $\times 10^4$ ) and equivalent isotropic displacement parameters ( $\text{\AA}^2 \times 10^3$ ) for bm32zas.  $U(\text{eq})$  is defined as one third of the trace of the orthogonalized  $U^{ij}$  tensor.

|       | x       | y       | z       | U(eq) |
|-------|---------|---------|---------|-------|
| P(1)  | 4052(1) | 3634(1) | 1854(1) | 27(1) |
| S(1)  | 3965(1) | 2429(1) | 2627(1) | 35(1) |
| S(2)  | 4384(1) | 2638(1) | 3480(1) | 38(1) |
| N(1)  | 3343(3) | 4628(3) | 2272(2) | 28(1) |
| N(2)  | 5262(3) | 3662(3) | 1531(2) | 32(1) |
| N(3)  | 3629(3) | 3572(3) | 1191(2) | 33(1) |
| C(1)  | 3143(4) | 3229(4) | 4108(3) | 36(1) |
| C(2)  | 2982(5) | 4107(4) | 4328(3) | 45(1) |
| C(3)  | 2067(5) | 4563(5) | 4852(3) | 58(2) |
| C(4)  | 1306(5) | 4142(5) | 5151(3) | 62(2) |
| C(5)  | 1456(5) | 3276(6) | 4932(3) | 62(2) |
| C(6)  | 2385(5) | 2807(4) | 4411(3) | 46(1) |
| C(7)  | 3605(4) | 5494(3) | 2053(2) | 29(1) |
| C(8)  | 4553(4) | 5470(3) | 2105(2) | 28(1) |
| C(9)  | 4800(4) | 6343(3) | 1842(2) | 32(1) |
| C(10) | 5798(4) | 6364(4) | 1798(3) | 41(1) |
| C(11) | 5998(5) | 7205(4) | 1545(3) | 53(2) |
| C(12) | 5230(5) | 8062(4) | 1328(4) | 59(2) |
| C(13) | 4268(5) | 8069(4) | 1354(3) | 52(2) |
| C(14) | 4027(4) | 7214(3) | 1601(3) | 36(1) |
| C(15) | 3059(4) | 7192(4) | 1594(3) | 40(1) |
| C(16) | 2853(4) | 6358(3) | 1801(3) | 36(1) |
| C(17) | 5718(4) | 3715(3) | 2077(3) | 31(1) |
| C(18) | 5324(4) | 4568(3) | 2390(2) | 30(1) |
| C(19) | 5666(4) | 4569(4) | 3013(3) | 34(1) |
| C(20) | 5208(4) | 5372(4) | 3428(3) | 43(1) |
| C(21) | 5547(5) | 5339(5) | 4018(3) | 57(2) |
| C(22) | 6359(5) | 4507(6) | 4218(4) | 66(2) |
| C(23) | 6805(5) | 3715(5) | 3838(3) | 55(2) |
| C(24) | 6476(4) | 3713(4) | 3229(3) | 41(1) |
| C(25) | 6916(4) | 2886(4) | 2835(3) | 42(1) |
| C(26) | 6539(4) | 2874(4) | 2290(3) | 40(1) |
| C(27) | 6028(4) | 3083(4) | 910(3)  | 43(1) |

|        |          |          |         |       |
|--------|----------|----------|---------|-------|
| C(28)  | 2232(4)  | 4765(4)  | 2707(3) | 34(1) |
| C(29)  | 3476(4)  | 2718(4)  | 1032(3) | 39(1) |
| C(30)  | 2525(5)  | 2513(5)  | 1583(3) | 52(1) |
| C(31)  | 4470(5)  | 1819(4)  | 895(3)  | 50(1) |
| C(32)  | 3430(20) | 4479(10) | 648(9)  | 35(3) |
| C(33)  | 2250(20) | 4927(13) | 693(11) | 44(4) |
| C(34)  | 4120(20) | 4270(20) | -137(9) | 47(4) |
| C(32B) | 3140(30) | 4515(11) | 743(13) | 33(4) |
| C(33B) | 1970(20) | 4800(20) | 794(16) | 51(5) |
| C(34B) | 3810(30) | 4500(20) | -58(15) | 44(5) |
| B(1)   | 273(4)   | 396(4)   | 2330(3) | 27(1) |
| C(35)  | 787(3)   | 77(3)    | 1490(2) | 27(1) |
| C(36)  | 643(3)   | -639(3)  | 1232(2) | 28(1) |
| C(37)  | 1157(4)  | -897(3)  | 512(3)  | 31(1) |
| C(38)  | 1866(4)  | -487(4)  | 32(3)   | 35(1) |
| C(39)  | 2051(4)  | 200(4)   | 285(3)  | 35(1) |
| C(40)  | 1519(4)  | 469(3)   | 993(2)  | 30(1) |
| C(41)  | 966(4)   | -1657(4) | 264(3)  | 37(1) |
| F(1)   | -35(3)   | -1591(3) | 507(2)  | 68(1) |
| F(2)   | 1555(3)  | -2564(2) | 478(2)  | 63(1) |
| F(3)   | 1221(3)  | -1624(3) | -474(2) | 65(1) |
| C(42)  | 2813(4)  | 657(4)   | -199(3) | 51(1) |
| F(4)   | 3302(9)  | 392(8)   | -851(4) | 68(3) |
| F(5)   | 3667(6)  | 369(7)   | 104(4)  | 69(3) |
| F(6)   | 2499(7)  | 1586(5)  | -164(6) | 79(3) |
| F(4B)  | 3598(7)  | 78(6)    | -673(5) | 58(3) |
| F(5B)  | 3144(9)  | 1078(9)  | 114(5)  | 80(3) |
| F(6B)  | 2323(6)  | 1400(6)  | -671(5) | 82(3) |
| C(43)  | -855(4)  | 253(3)   | 2778(2) | 28(1) |
| C(44)  | -1579(4) | 244(3)   | 2447(3) | 29(1) |
| C(45)  | -2541(4) | 143(3)   | 2863(3) | 32(1) |
| C(46)  | -2821(4) | 61(4)    | 3619(3) | 42(1) |
| C(47)  | -2138(4) | 92(4)    | 3962(3) | 42(1) |
| C(48)  | -1185(4) | 188(4)   | 3551(3) | 35(1) |
| C(49)  | -3246(4) | 72(4)    | 2473(3) | 39(1) |
| F(7)   | -4229(3) | 220(3)   | 2898(2) | 64(1) |
| F(8)   | -2869(3) | -811(3)  | 2238(2) | 69(1) |
| F(9)   | -3334(3) | 713(2)   | 1873(2) | 50(1) |

|        |           |           |          |        |
|--------|-----------|-----------|----------|--------|
| C(50)  | -2376(6)  | -35(6)    | 4788(3)  | 64(2)  |
| F(10)  | -2357(4)  | 674(4)    | 5043(2)  | 101(2) |
| F(11)  | -3299(3)  | -148(4)   | 5118(2)  | 83(1)  |
| F(12)  | -1631(4)  | -840(4)   | 5036(2)  | 94(1)  |
| C(51)  | 1197(4)   | -288(3)   | 2750(2)  | 27(1)  |
| C(52)  | 1204(4)   | -1184(3)  | 3156(2)  | 28(1)  |
| C(53)  | 2013(4)   | -1791(3)  | 3488(2)  | 31(1)  |
| C(54)  | 2867(4)   | -1530(3)  | 3412(3)  | 33(1)  |
| C(55)  | 2889(4)   | -659(3)   | 3002(3)  | 32(1)  |
| C(56)  | 2070(4)   | -51(3)    | 2681(2)  | 30(1)  |
| C(57)  | 1959(4)   | -2723(3)  | 3928(3)  | 40(1)  |
| F(13)  | 2434(5)   | -3471(3)  | 3526(2)  | 75(2)  |
| F(14)  | 987(3)    | -2683(4)  | 4263(3)  | 77(2)  |
| F(15)  | 2465(4)   | -3006(3)  | 4450(3)  | 70(2)  |
| F(13B) | 2877(11)  | -3463(14) | 3854(15) | 79(7)  |
| F(14B) | 1341(17)  | -3043(16) | 3760(13) | 60(6)  |
| F(15B) | 1580(20)  | -2640(20) | 4639(6)  | 86(7)  |
| C(58)  | 3780(4)   | -335(4)   | 2912(3)  | 42(1)  |
| F(16)  | 4595(3)   | -1034(3)  | 3114(3)  | 85(1)  |
| F(17)  | 3459(3)   | 404(3)    | 3320(2)  | 68(1)  |
| F(18)  | 4148(3)   | 12(3)     | 2227(2)  | 52(1)  |
| C(59)  | 0(3)      | 1573(3)   | 2313(2)  | 28(1)  |
| C(60)  | 55(4)     | 1974(4)   | 2871(3)  | 32(1)  |
| C(61)  | -231(4)   | 2976(4)   | 2864(3)  | 38(1)  |
| C(62)  | -589(4)   | 3622(4)   | 2291(3)  | 38(1)  |
| C(63)  | -659(4)   | 3242(3)   | 1731(3)  | 35(1)  |
| C(64)  | -379(4)   | 2246(3)   | 1747(3)  | 30(1)  |
| C(65)  | -107(4)   | 3352(4)   | 3459(3)  | 50(1)  |
| F(19)  | -631(6)   | 3132(6)   | 4111(3)  | 70(2)  |
| F(20)  | 908(5)    | 3052(7)   | 3447(4)  | 84(2)  |
| F(21)  | -394(9)   | 4327(4)   | 3375(5)  | 102(3) |
| F(19B) | -1015(7)  | 3959(10)  | 3849(8)  | 87(4)  |
| F(20B) | 213(13)   | 2657(7)   | 3998(6)  | 91(4)  |
| F(21B) | 521(10)   | 3821(10)  | 3248(6)  | 71(3)  |
| C(66)  | -1032(4)  | 3909(3)   | 1101(3)  | 47(1)  |
| F(22)  | -1034(11) | 4790(5)   | 1022(6)  | 83(3)  |
| F(23)  | -463(8)   | 3568(6)   | 446(3)   | 79(3)  |
| F(24)  | -2001(6)  | 4013(8)   | 1111(5)  | 81(3)  |

|        |           |          |          |        |
|--------|-----------|----------|----------|--------|
| F(22B) | -1718(9)  | 4786(6)  | 1300(5)  | 80(3)  |
| F(23B) | -243(7)   | 4092(10) | 597(6)   | 96(4)  |
| F(24B) | -1502(10) | 3596(7)  | 798(6)   | 74(3)  |
| C(68)  | 8915(15)  | 6921(15) | 2729(13) | 120(5) |
| Cl(1)  | 9762(10)  | 7293(9)  | 2878(7)  | 114(3) |
| Cl(2)  | 9287(14)  | 6366(10) | 1988(8)  | 173(4) |
| C(68B) | 9010(20)  | 7203(18) | 2220(20) | 121(6) |
| Cl(1B) | 9816(15)  | 7183(15) | 2667(12) | 135(5) |
| Cl(2B) | 9448(12)  | 6271(8)  | 1736(9)  | 130(4) |
| C(69)  | 5459(9)   | 8361(11) | 4576(7)  | 81(4)  |
| Cl(3)  | 4702(3)   | 7627(3)  | 5032(2)  | 60(1)  |
| Cl(4)  | 6589(4)   | 7646(5)  | 3941(3)  | 115(3) |
| C(69B) | 5851(17)  | 7905(16) | 4289(10) | 103(5) |
| Cl(3B) | 4816(15)  | 7567(15) | 4917(10) | 282(8) |
| Cl(4B) | 6490(8)   | 7133(7)  | 3561(6)  | 168(4) |

---

**Table S9.** Bond lengths [ $\text{\AA}$ ] and angles [ $^\circ$ ] for bm32zas.

---

|             |            |
|-------------|------------|
| P(1)-N(3)   | 1.629(4)   |
| P(1)-N(1)   | 1.638(4)   |
| P(1)-N(2)   | 1.655(4)   |
| P(1)-S(1)   | 2.0993(16) |
| S(1)-S(2)   | 2.0625(17) |
| S(2)-C(1)   | 1.781(5)   |
| N(1)-C(7)   | 1.446(6)   |
| N(1)-C(28)  | 1.485(6)   |
| N(2)-C(17)  | 1.449(6)   |
| N(2)-C(27)  | 1.487(6)   |
| N(3)-C(29)  | 1.508(6)   |
| N(3)-C(32)  | 1.515(9)   |
| N(3)-C(32B) | 1.516(10)  |
| C(1)-C(6)   | 1.385(7)   |
| C(1)-C(2)   | 1.392(7)   |
| C(2)-C(3)   | 1.380(8)   |
| C(2)-H(2A)  | 0.9500     |
| C(3)-C(4)   | 1.387(10)  |
| C(3)-H(3A)  | 0.9500     |

|              |           |
|--------------|-----------|
| C(4)-C(5)    | 1.380(10) |
| C(4)-H(4A)   | 0.9500    |
| C(5)-C(6)    | 1.392(9)  |
| C(5)-H(5A)   | 0.9500    |
| C(6)-H(6A)   | 0.9500    |
| C(7)-C(8)    | 1.385(6)  |
| C(7)-C(16)   | 1.415(6)  |
| C(8)-C(9)    | 1.448(6)  |
| C(8)-C(18)   | 1.484(6)  |
| C(9)-C(10)   | 1.422(7)  |
| C(9)-C(14)   | 1.427(7)  |
| C(10)-C(11)  | 1.367(7)  |
| C(10)-H(10A) | 0.9500    |
| C(11)-C(12)  | 1.396(9)  |
| C(11)-H(11A) | 0.9500    |
| C(12)-C(13)  | 1.362(9)  |
| C(12)-H(12A) | 0.9500    |
| C(13)-C(14)  | 1.415(7)  |
| C(13)-H(13A) | 0.9500    |
| C(14)-C(15)  | 1.410(7)  |
| C(15)-C(16)  | 1.358(7)  |
| C(15)-H(15A) | 0.9500    |
| C(16)-H(16A) | 0.9500    |
| C(17)-C(18)  | 1.368(7)  |
| C(17)-C(26)  | 1.421(7)  |
| C(18)-C(19)  | 1.447(6)  |
| C(19)-C(20)  | 1.406(7)  |
| C(19)-C(24)  | 1.426(7)  |
| C(20)-C(21)  | 1.370(8)  |
| C(20)-H(20A) | 0.9500    |
| C(21)-C(22)  | 1.398(10) |
| C(21)-H(21A) | 0.9500    |
| C(22)-C(23)  | 1.354(10) |
| C(22)-H(22A) | 0.9500    |
| C(23)-C(24)  | 1.412(8)  |
| C(23)-H(23)  | 0.9500    |
| C(24)-C(25)  | 1.414(8)  |
| C(25)-C(26)  | 1.345(8)  |

|               |           |
|---------------|-----------|
| C(25)-H(25A)  | 0.9500    |
| C(26)-H(26A)  | 0.9500    |
| C(27)-H(27A)  | 0.9800    |
| C(27)-H(27B)  | 0.9800    |
| C(27)-H(27C)  | 0.9800    |
| C(28)-H(28A)  | 0.9800    |
| C(28)-H(28B)  | 0.9800    |
| C(28)-H(28C)  | 0.9800    |
| C(29)-C(31)   | 1.501(8)  |
| C(29)-C(30)   | 1.525(8)  |
| C(29)-H(29A)  | 1.0000    |
| C(30)-H(30A)  | 0.9800    |
| C(30)-H(30B)  | 0.9800    |
| C(30)-H(30C)  | 0.9800    |
| C(31)-H(31A)  | 0.9800    |
| C(31)-H(31B)  | 0.9800    |
| C(31)-H(31C)  | 0.9800    |
| C(32)-C(34)   | 1.530(12) |
| C(32)-C(33)   | 1.533(13) |
| C(32)-H(32A)  | 1.0000    |
| C(33)-H(33A)  | 0.9800    |
| C(33)-H(33B)  | 0.9800    |
| C(33)-H(33C)  | 0.9800    |
| C(34)-H(34A)  | 0.9800    |
| C(34)-H(34B)  | 0.9800    |
| C(34)-H(34C)  | 0.9800    |
| C(32B)-C(33B) | 1.529(14) |
| C(32B)-C(34B) | 1.529(13) |
| C(32B)-H(32B) | 1.0000    |
| C(33B)-H(33D) | 0.9800    |
| C(33B)-H(33E) | 0.9800    |
| C(33B)-H(33F) | 0.9800    |
| C(34B)-H(34D) | 0.9800    |
| C(34B)-H(34E) | 0.9800    |
| C(34B)-H(34F) | 0.9800    |
| B(1)-C(35)    | 1.637(7)  |
| B(1)-C(43)    | 1.641(7)  |
| B(1)-C(51)    | 1.642(6)  |

|              |          |
|--------------|----------|
| B(1)-C(59)   | 1.652(7) |
| C(35)-C(40)  | 1.403(6) |
| C(35)-C(36)  | 1.403(6) |
| C(36)-C(37)  | 1.400(6) |
| C(36)-H(36A) | 0.9500   |
| C(37)-C(38)  | 1.384(7) |
| C(37)-C(41)  | 1.494(6) |
| C(38)-C(39)  | 1.393(7) |
| C(38)-H(38A) | 0.9500   |
| C(39)-C(40)  | 1.387(7) |
| C(39)-C(42)  | 1.485(7) |
| C(40)-H(40A) | 0.9500   |
| C(41)-F(1)   | 1.322(6) |
| C(41)-F(2)   | 1.336(6) |
| C(41)-F(3)   | 1.346(6) |
| C(42)-F(5B)  | 1.275(7) |
| C(42)-F(4)   | 1.284(7) |
| C(42)-F(6)   | 1.297(7) |
| C(42)-F(4B)  | 1.315(7) |
| C(42)-F(6B)  | 1.379(7) |
| C(42)-F(5)   | 1.400(7) |
| C(43)-C(44)  | 1.399(6) |
| C(43)-C(48)  | 1.405(6) |
| C(44)-C(45)  | 1.400(6) |
| C(44)-H(44A) | 0.9500   |
| C(45)-C(46)  | 1.374(7) |
| C(45)-C(49)  | 1.500(7) |
| C(46)-C(47)  | 1.377(8) |
| C(46)-H(46A) | 0.9500   |
| C(47)-C(48)  | 1.384(7) |
| C(47)-C(50)  | 1.504(8) |
| C(48)-H(48A) | 0.9500   |
| C(49)-F(7)   | 1.328(6) |
| C(49)-F(9)   | 1.338(6) |
| C(49)-F(8)   | 1.340(6) |
| C(50)-F(10)  | 1.293(8) |
| C(50)-F(11)  | 1.331(7) |
| C(50)-F(12)  | 1.361(9) |



|              |          |
|--------------|----------|
| C(51)-C(56)  | 1.401(6) |
| C(51)-C(52)  | 1.403(6) |
| C(52)-C(53)  | 1.397(6) |
| C(52)-H(52A) | 0.9500   |
| C(53)-C(54)  | 1.394(7) |
| C(53)-C(57)  | 1.491(6) |
| C(54)-C(55)  | 1.383(7) |
| C(54)-H(54A) | 0.9500   |
| C(55)-C(56)  | 1.395(6) |
| C(55)-C(58)  | 1.497(7) |
| C(56)-H(56A) | 0.9500   |
| C(57)-F(14)  | 1.309(5) |
| C(57)-F(13B) | 1.315(9) |
| C(57)-F(15B) | 1.316(9) |
| C(57)-F(14B) | 1.324(9) |
| C(57)-F(13)  | 1.324(5) |
| C(57)-F(15)  | 1.332(5) |
| C(58)-F(16)  | 1.315(6) |
| C(58)-F(18)  | 1.328(6) |
| C(58)-F(17)  | 1.349(7) |
| C(59)-C(60)  | 1.392(6) |
| C(59)-C(64)  | 1.402(6) |
| C(60)-C(61)  | 1.394(7) |
| C(60)-H(60A) | 0.9500   |
| C(61)-C(62)  | 1.388(7) |
| C(61)-C(65)  | 1.485(7) |
| C(62)-C(63)  | 1.386(7) |
| C(62)-H(62A) | 0.9500   |
| C(63)-C(64)  | 1.384(7) |
| C(63)-C(66)  | 1.492(7) |
| C(64)-H(64A) | 0.9500   |
| C(65)-F(21B) | 1.282(7) |
| C(65)-F(19)  | 1.285(6) |
| C(65)-F(20)  | 1.328(6) |
| C(65)-F(19B) | 1.330(8) |
| C(65)-F(21)  | 1.342(6) |
| C(65)-F(20B) | 1.353(8) |
| C(66)-F(24B) | 1.297(7) |

|                   |            |
|-------------------|------------|
| C(66)-F(22)       | 1.306(6)   |
| C(66)-F(23B)      | 1.308(7)   |
| C(66)-F(24)       | 1.328(7)   |
| C(66)-F(22B)      | 1.330(7)   |
| C(66)-F(23)       | 1.339(7)   |
| C(68)-Cl(2)       | 1.646(11)  |
| C(68)-Cl(1)       | 1.662(11)  |
| C(68)-H(68A)      | 0.9900     |
| C(68)-H(68B)      | 0.9900     |
| C(68B)-Cl(2B)     | 1.652(12)  |
| C(68B)-Cl(1B)     | 1.654(12)  |
| C(68B)-H(68C)     | 0.9900     |
| C(68B)-H(68D)     | 0.9900     |
| C(69)-Cl(3)       | 1.765(11)  |
| C(69)-Cl(4)       | 1.767(12)  |
| C(69)-H(69A)      | 0.9900     |
| C(69)-H(69B)      | 0.9900     |
| C(69B)-Cl(3B)     | 1.759(12)  |
| C(69B)-Cl(4B)     | 1.785(13)  |
| C(69B)-H(69C)     | 0.9900     |
| C(69B)-H(69D)     | 0.9900     |
|                   |            |
| N(3)-P(1)-N(1)    | 114.1(2)   |
| N(3)-P(1)-N(2)    | 110.8(2)   |
| N(1)-P(1)-N(2)    | 104.11(19) |
| N(3)-P(1)-S(1)    | 106.36(15) |
| N(1)-P(1)-S(1)    | 108.19(14) |
| N(2)-P(1)-S(1)    | 113.44(15) |
| S(2)-S(1)-P(1)    | 103.49(7)  |
| C(1)-S(2)-S(1)    | 104.07(16) |
| C(7)-N(1)-C(28)   | 116.6(4)   |
| C(7)-N(1)-P(1)    | 122.4(3)   |
| C(28)-N(1)-P(1)   | 117.9(3)   |
| C(17)-N(2)-C(27)  | 115.6(4)   |
| C(17)-N(2)-P(1)   | 115.4(3)   |
| C(27)-N(2)-P(1)   | 119.0(3)   |
| C(29)-N(3)-C(32)  | 117.3(9)   |
| C(29)-N(3)-C(32B) | 112.7(10)  |

|                    |          |
|--------------------|----------|
| C(29)-N(3)-P(1)    | 128.4(3) |
| C(32)-N(3)-P(1)    | 114.2(9) |
| C(32B)-N(3)-P(1)   | 118.0(9) |
| C(6)-C(1)-C(2)     | 120.4(5) |
| C(6)-C(1)-S(2)     | 121.8(4) |
| C(2)-C(1)-S(2)     | 117.6(4) |
| C(3)-C(2)-C(1)     | 120.1(6) |
| C(3)-C(2)-H(2A)    | 119.9    |
| C(1)-C(2)-H(2A)    | 119.9    |
| C(2)-C(3)-C(4)     | 119.4(6) |
| C(2)-C(3)-H(3A)    | 120.3    |
| C(4)-C(3)-H(3A)    | 120.3    |
| C(5)-C(4)-C(3)     | 120.8(6) |
| C(5)-C(4)-H(4A)    | 119.6    |
| C(3)-C(4)-H(4A)    | 119.6    |
| C(4)-C(5)-C(6)     | 119.9(6) |
| C(4)-C(5)-H(5A)    | 120.0    |
| C(6)-C(5)-H(5A)    | 120.0    |
| C(1)-C(6)-C(5)     | 119.3(6) |
| C(1)-C(6)-H(6A)    | 120.3    |
| C(5)-C(6)-H(6A)    | 120.3    |
| C(8)-C(7)-C(16)    | 121.9(4) |
| C(8)-C(7)-N(1)     | 120.3(4) |
| C(16)-C(7)-N(1)    | 117.7(4) |
| C(7)-C(8)-C(9)     | 118.0(4) |
| C(7)-C(8)-C(18)    | 121.6(4) |
| C(9)-C(8)-C(18)    | 120.3(4) |
| C(10)-C(9)-C(14)   | 118.2(4) |
| C(10)-C(9)-C(8)    | 122.5(4) |
| C(14)-C(9)-C(8)    | 119.3(4) |
| C(11)-C(10)-C(9)   | 120.5(5) |
| C(11)-C(10)-H(10A) | 119.7    |
| C(9)-C(10)-H(10A)  | 119.7    |
| C(10)-C(11)-C(12)  | 121.0(6) |
| C(10)-C(11)-H(11A) | 119.5    |
| C(12)-C(11)-H(11A) | 119.5    |
| C(13)-C(12)-C(11)  | 120.2(5) |
| C(13)-C(12)-H(12A) | 119.9    |

|                    |          |
|--------------------|----------|
| C(11)-C(12)-H(12A) | 119.9    |
| C(12)-C(13)-C(14)  | 120.9(6) |
| C(12)-C(13)-H(13A) | 119.5    |
| C(14)-C(13)-H(13A) | 119.5    |
| C(15)-C(14)-C(13)  | 121.8(5) |
| C(15)-C(14)-C(9)   | 119.1(4) |
| C(13)-C(14)-C(9)   | 119.1(5) |
| C(16)-C(15)-C(14)  | 121.5(4) |
| C(16)-C(15)-H(15A) | 119.2    |
| C(14)-C(15)-H(15A) | 119.2    |
| C(15)-C(16)-C(7)   | 119.9(5) |
| C(15)-C(16)-H(16A) | 120.1    |
| C(7)-C(16)-H(16A)  | 120.1    |
| C(18)-C(17)-C(26)  | 121.6(4) |
| C(18)-C(17)-N(2)   | 119.0(4) |
| C(26)-C(17)-N(2)   | 119.4(4) |
| C(17)-C(18)-C(19)  | 118.5(4) |
| C(17)-C(18)-C(8)   | 120.9(4) |
| C(19)-C(18)-C(8)   | 120.6(4) |
| C(20)-C(19)-C(24)  | 118.5(4) |
| C(20)-C(19)-C(18)  | 122.6(4) |
| C(24)-C(19)-C(18)  | 118.8(5) |
| C(21)-C(20)-C(19)  | 120.7(5) |
| C(21)-C(20)-H(20A) | 119.6    |
| C(19)-C(20)-H(20A) | 119.6    |
| C(20)-C(21)-C(22)  | 120.6(6) |
| C(20)-C(21)-H(21A) | 119.7    |
| C(22)-C(21)-H(21A) | 119.7    |
| C(23)-C(22)-C(21)  | 120.2(5) |
| C(23)-C(22)-H(22A) | 119.9    |
| C(21)-C(22)-H(22A) | 119.9    |
| C(22)-C(23)-C(24)  | 121.2(6) |
| C(22)-C(23)-H(23)  | 119.4    |
| C(24)-C(23)-H(23)  | 119.4    |
| C(23)-C(24)-C(25)  | 122.0(5) |
| C(23)-C(24)-C(19)  | 118.7(5) |
| C(25)-C(24)-C(19)  | 119.3(4) |
| C(26)-C(25)-C(24)  | 121.1(5) |

|                     |           |
|---------------------|-----------|
| C(26)-C(25)-H(25A)  | 119.5     |
| C(24)-C(25)-H(25A)  | 119.5     |
| C(25)-C(26)-C(17)   | 120.3(5)  |
| C(25)-C(26)-H(26A)  | 119.9     |
| C(17)-C(26)-H(26A)  | 119.9     |
| N(2)-C(27)-H(27A)   | 109.5     |
| N(2)-C(27)-H(27B)   | 109.5     |
| H(27A)-C(27)-H(27B) | 109.5     |
| N(2)-C(27)-H(27C)   | 109.5     |
| H(27A)-C(27)-H(27C) | 109.5     |
| H(27B)-C(27)-H(27C) | 109.5     |
| N(1)-C(28)-H(28A)   | 109.5     |
| N(1)-C(28)-H(28B)   | 109.5     |
| H(28A)-C(28)-H(28B) | 109.5     |
| N(1)-C(28)-H(28C)   | 109.5     |
| H(28A)-C(28)-H(28C) | 109.5     |
| H(28B)-C(28)-H(28C) | 109.5     |
| C(31)-C(29)-N(3)    | 114.2(4)  |
| C(31)-C(29)-C(30)   | 113.2(5)  |
| N(3)-C(29)-C(30)    | 113.2(4)  |
| C(31)-C(29)-H(29A)  | 105.0     |
| N(3)-C(29)-H(29A)   | 105.0     |
| C(30)-C(29)-H(29A)  | 105.0     |
| C(29)-C(30)-H(30A)  | 109.5     |
| C(29)-C(30)-H(30B)  | 109.5     |
| H(30A)-C(30)-H(30B) | 109.5     |
| C(29)-C(30)-H(30C)  | 109.5     |
| H(30A)-C(30)-H(30C) | 109.5     |
| H(30B)-C(30)-H(30C) | 109.5     |
| C(29)-C(31)-H(31A)  | 109.5     |
| C(29)-C(31)-H(31B)  | 109.5     |
| H(31A)-C(31)-H(31B) | 109.5     |
| C(29)-C(31)-H(31C)  | 109.5     |
| H(31A)-C(31)-H(31C) | 109.5     |
| H(31B)-C(31)-H(31C) | 109.5     |
| N(3)-C(32)-C(34)    | 112.7(12) |
| N(3)-C(32)-C(33)    | 108.0(12) |
| C(34)-C(32)-C(33)   | 112.0(9)  |

|                      |           |
|----------------------|-----------|
| N(3)-C(32)-H(32A)    | 108.0     |
| C(34)-C(32)-H(32A)   | 108.0     |
| C(33)-C(32)-H(32A)   | 108.0     |
| N(3)-C(32B)-C(33B)   | 115.5(17) |
| N(3)-C(32B)-C(34B)   | 110.1(15) |
| C(33B)-C(32B)-C(34B) | 111.4(11) |
| N(3)-C(32B)-H(32B)   | 106.4     |
| C(33B)-C(32B)-H(32B) | 106.4     |
| C(34B)-C(32B)-H(32B) | 106.4     |
| C(32B)-C(33B)-H(33D) | 109.5     |
| C(32B)-C(33B)-H(33E) | 109.5     |
| H(33D)-C(33B)-H(33E) | 109.5     |
| C(32B)-C(33B)-H(33F) | 109.5     |
| H(33D)-C(33B)-H(33F) | 109.5     |
| H(33E)-C(33B)-H(33F) | 109.5     |
| C(32B)-C(34B)-H(34D) | 109.5     |
| C(32B)-C(34B)-H(34E) | 109.5     |
| H(34D)-C(34B)-H(34E) | 109.5     |
| C(32B)-C(34B)-H(34F) | 109.5     |
| H(34D)-C(34B)-H(34F) | 109.5     |
| H(34E)-C(34B)-H(34F) | 109.5     |
| C(35)-B(1)-C(43)     | 115.6(4)  |
| C(35)-B(1)-C(51)     | 104.2(4)  |
| C(43)-B(1)-C(51)     | 110.4(4)  |
| C(35)-B(1)-C(59)     | 109.8(4)  |
| C(43)-B(1)-C(59)     | 104.8(4)  |
| C(51)-B(1)-C(59)     | 112.2(3)  |
| C(40)-C(35)-C(36)    | 115.4(4)  |
| C(40)-C(35)-B(1)     | 118.7(4)  |
| C(36)-C(35)-B(1)     | 125.6(4)  |
| C(37)-C(36)-C(35)    | 121.5(4)  |
| C(37)-C(36)-H(36A)   | 119.2     |
| C(35)-C(36)-H(36A)   | 119.2     |
| C(38)-C(37)-C(36)    | 121.5(4)  |
| C(38)-C(37)-C(41)    | 119.3(4)  |
| C(36)-C(37)-C(41)    | 119.2(4)  |
| C(37)-C(38)-C(39)    | 118.0(4)  |
| C(37)-C(38)-H(38A)   | 121.0     |

|                    |          |
|--------------------|----------|
| C(39)-C(38)-H(38A) | 121.0    |
| C(40)-C(39)-C(38)  | 120.2(4) |
| C(40)-C(39)-C(42)  | 119.2(4) |
| C(38)-C(39)-C(42)  | 120.6(4) |
| C(39)-C(40)-C(35)  | 123.3(4) |
| C(39)-C(40)-H(40A) | 118.3    |
| C(35)-C(40)-H(40A) | 118.3    |
| F(1)-C(41)-F(2)    | 106.6(4) |
| F(1)-C(41)-F(3)    | 105.9(4) |
| F(2)-C(41)-F(3)    | 104.4(4) |
| F(1)-C(41)-C(37)   | 113.6(4) |
| F(2)-C(41)-C(37)   | 112.6(4) |
| F(3)-C(41)-C(37)   | 113.0(4) |
| F(5B)-C(42)-F(4)   | 122.3(8) |
| F(5B)-C(42)-F(6)   | 52.5(6)  |
| F(4)-C(42)-F(6)    | 114.1(7) |
| F(5B)-C(42)-F(4B)  | 111.8(7) |
| F(6)-C(42)-F(4B)   | 131.0(7) |
| F(5B)-C(42)-F(6B)  | 103.3(7) |
| F(4)-C(42)-F(6B)   | 73.6(7)  |
| F(6)-C(42)-F(6B)   | 53.6(6)  |
| F(4B)-C(42)-F(6B)  | 100.6(6) |
| F(4)-C(42)-F(5)    | 101.1(7) |
| F(6)-C(42)-F(5)    | 96.5(6)  |
| F(4B)-C(42)-F(5)   | 77.7(6)  |
| F(6B)-C(42)-F(5)   | 139.2(6) |
| F(5B)-C(42)-C(39)  | 116.8(6) |
| F(4)-C(42)-C(39)   | 118.2(6) |
| F(6)-C(42)-C(39)   | 114.7(5) |
| F(4B)-C(42)-C(39)  | 113.2(6) |
| F(6B)-C(42)-C(39)  | 109.3(5) |
| F(5)-C(42)-C(39)   | 108.6(5) |
| C(44)-C(43)-C(48)  | 115.0(4) |
| C(44)-C(43)-B(1)   | 124.8(4) |
| C(48)-C(43)-B(1)   | 120.1(4) |
| C(43)-C(44)-C(45)  | 121.9(4) |
| C(43)-C(44)-H(44A) | 119.0    |
| C(45)-C(44)-H(44A) | 119.0    |

|                    |          |
|--------------------|----------|
| C(46)-C(45)-C(44)  | 121.0(4) |
| C(46)-C(45)-C(49)  | 119.9(4) |
| C(44)-C(45)-C(49)  | 119.0(4) |
| C(45)-C(46)-C(47)  | 118.5(5) |
| C(45)-C(46)-H(46A) | 120.7    |
| C(47)-C(46)-H(46A) | 120.7    |
| C(46)-C(47)-C(48)  | 120.4(5) |
| C(46)-C(47)-C(50)  | 121.2(5) |
| C(48)-C(47)-C(50)  | 118.3(5) |
| C(47)-C(48)-C(43)  | 123.0(4) |
| C(47)-C(48)-H(48A) | 118.5    |
| C(43)-C(48)-H(48A) | 118.5    |
| F(7)-C(49)-F(9)    | 106.6(4) |
| F(7)-C(49)-F(8)    | 106.6(4) |
| F(9)-C(49)-F(8)    | 105.7(4) |
| F(7)-C(49)-C(45)   | 112.8(4) |
| F(9)-C(49)-C(45)   | 113.1(4) |
| F(8)-C(49)-C(45)   | 111.4(4) |
| F(10)-C(50)-F(11)  | 109.6(6) |
| F(10)-C(50)-F(12)  | 103.6(6) |
| F(11)-C(50)-F(12)  | 105.6(6) |
| F(10)-C(50)-C(47)  | 112.6(6) |
| F(11)-C(50)-C(47)  | 112.4(6) |
| F(12)-C(50)-C(47)  | 112.4(6) |
| C(56)-C(51)-C(52)  | 115.7(4) |
| C(56)-C(51)-B(1)   | 122.1(4) |
| C(52)-C(51)-B(1)   | 122.0(4) |
| C(53)-C(52)-C(51)  | 122.4(4) |
| C(53)-C(52)-H(52A) | 118.8    |
| C(51)-C(52)-H(52A) | 118.8    |
| C(54)-C(53)-C(52)  | 120.4(4) |
| C(54)-C(53)-C(57)  | 119.9(4) |
| C(52)-C(53)-C(57)  | 119.7(4) |
| C(55)-C(54)-C(53)  | 118.3(4) |
| C(55)-C(54)-H(54A) | 120.8    |
| C(53)-C(54)-H(54A) | 120.8    |
| C(54)-C(55)-C(56)  | 120.9(4) |
| C(54)-C(55)-C(58)  | 120.5(4) |



|                     |           |
|---------------------|-----------|
| C(56)-C(55)-C(58)   | 118.6(4)  |
| C(55)-C(56)-C(51)   | 122.3(4)  |
| C(55)-C(56)-H(56A)  | 118.8     |
| C(51)-C(56)-H(56A)  | 118.8     |
| F(14)-C(57)-F(13B)  | 131.0(12) |
| F(14)-C(57)-F(15B)  | 60.2(12)  |
| F(13B)-C(57)-F(15B) | 105.3(12) |
| F(14)-C(57)-F(14B)  | 48.8(10)  |
| F(13B)-C(57)-F(14B) | 104.6(11) |
| F(15B)-C(57)-F(14B) | 105.5(12) |
| F(14)-C(57)-F(13)   | 107.3(5)  |
| F(13B)-C(57)-F(13)  | 46.6(12)  |
| F(15B)-C(57)-F(13)  | 134.1(12) |
| F(14B)-C(57)-F(13)  | 62.8(11)  |
| F(14)-C(57)-F(15)   | 106.0(4)  |
| F(13B)-C(57)-F(15)  | 59.5(12)  |
| F(15B)-C(57)-F(15)  | 50.2(12)  |
| F(14B)-C(57)-F(15)  | 133.7(10) |
| F(13)-C(57)-F(15)   | 103.6(4)  |
| F(14)-C(57)-C(53)   | 113.7(4)  |
| F(13B)-C(57)-C(53)  | 114.9(12) |
| F(15B)-C(57)-C(53)  | 112.5(12) |
| F(14B)-C(57)-C(53)  | 113.2(10) |
| F(13)-C(57)-C(53)   | 112.6(4)  |
| F(15)-C(57)-C(53)   | 112.8(4)  |
| F(16)-C(58)-F(18)   | 107.3(5)  |
| F(16)-C(58)-F(17)   | 106.5(4)  |
| F(18)-C(58)-F(17)   | 104.7(4)  |
| F(16)-C(58)-C(55)   | 113.1(4)  |
| F(18)-C(58)-C(55)   | 113.3(4)  |
| F(17)-C(58)-C(55)   | 111.4(5)  |
| C(60)-C(59)-C(64)   | 115.6(4)  |
| C(60)-C(59)-B(1)    | 123.3(4)  |
| C(64)-C(59)-B(1)    | 121.0(4)  |
| C(59)-C(60)-C(61)   | 122.4(4)  |
| C(59)-C(60)-H(60A)  | 118.8     |
| C(61)-C(60)-H(60A)  | 118.8     |
| C(62)-C(61)-C(60)   | 120.6(4)  |

|                     |          |
|---------------------|----------|
| C(62)-C(61)-C(65)   | 119.6(4) |
| C(60)-C(61)-C(65)   | 119.7(5) |
| C(63)-C(62)-C(61)   | 118.1(4) |
| C(63)-C(62)-H(62A)  | 121.0    |
| C(61)-C(62)-H(62A)  | 121.0    |
| C(64)-C(63)-C(62)   | 120.7(4) |
| C(64)-C(63)-C(66)   | 119.4(4) |
| C(62)-C(63)-C(66)   | 119.9(4) |
| C(63)-C(64)-C(59)   | 122.6(4) |
| C(63)-C(64)-H(64A)  | 118.7    |
| C(59)-C(64)-H(64A)  | 118.7    |
| F(21B)-C(65)-F(19)  | 130.1(7) |
| F(21B)-C(65)-F(20)  | 49.9(6)  |
| F(19)-C(65)-F(20)   | 108.5(6) |
| F(21B)-C(65)-F(19B) | 104.6(8) |
| F(19)-C(65)-F(19B)  | 54.8(7)  |
| F(20)-C(65)-F(19B)  | 134.3(7) |
| F(21B)-C(65)-F(21)  | 53.7(7)  |
| F(19)-C(65)-F(21)   | 106.5(6) |
| F(20)-C(65)-F(21)   | 101.6(6) |
| F(19B)-C(65)-F(21)  | 56.2(7)  |
| F(21B)-C(65)-F(20B) | 106.7(8) |
| F(19)-C(65)-F(20B)  | 49.0(6)  |
| F(20)-C(65)-F(20B)  | 63.4(7)  |
| F(19B)-C(65)-F(20B) | 100.6(8) |
| F(21)-C(65)-F(20B)  | 132.6(7) |
| F(21B)-C(65)-C(61)  | 115.5(6) |
| F(19)-C(65)-C(61)   | 114.4(5) |
| F(20)-C(65)-C(61)   | 111.6(5) |
| F(19B)-C(65)-C(61)  | 113.9(6) |
| F(21)-C(65)-C(61)   | 113.3(5) |
| F(20B)-C(65)-C(61)  | 114.0(6) |
| F(24B)-C(66)-F(22)  | 127.9(7) |
| F(24B)-C(66)-F(23B) | 109.3(8) |
| F(22)-C(66)-F(23B)  | 62.7(7)  |
| F(22)-C(66)-F(24)   | 106.4(7) |
| F(23B)-C(66)-F(24)  | 134.2(7) |
| F(24B)-C(66)-F(22B) | 106.1(7) |

|                      |           |
|----------------------|-----------|
| F(23B)-C(66)-F(22B)  | 103.8(7)  |
| F(24)-C(66)-F(22B)   | 70.6(7)   |
| F(24B)-C(66)-F(23)   | 64.4(6)   |
| F(22)-C(66)-F(23)    | 104.8(7)  |
| F(23B)-C(66)-F(23)   | 48.6(6)   |
| F(24)-C(66)-F(23)    | 101.1(7)  |
| F(22B)-C(66)-F(23)   | 133.1(6)  |
| F(24B)-C(66)-C(63)   | 114.5(5)  |
| F(22)-C(66)-C(63)    | 116.1(5)  |
| F(23B)-C(66)-C(63)   | 110.6(6)  |
| F(24)-C(66)-C(63)    | 113.5(5)  |
| F(22B)-C(66)-C(63)   | 111.9(5)  |
| F(23)-C(66)-C(63)    | 113.4(5)  |
| Cl(2)-C(68)-Cl(1)    | 118.6(12) |
| Cl(2)-C(68)-H(68A)   | 107.7     |
| Cl(1)-C(68)-H(68A)   | 107.7     |
| Cl(2)-C(68)-H(68B)   | 107.7     |
| Cl(1)-C(68)-H(68B)   | 107.7     |
| H(68A)-C(68)-H(68B)  | 107.1     |
| Cl(2B)-C(68B)-Cl(1B) | 115.5(15) |
| Cl(2B)-C(68B)-H(68C) | 108.4     |
| Cl(1B)-C(68B)-H(68C) | 108.4     |
| Cl(2B)-C(68B)-H(68D) | 108.4     |
| Cl(1B)-C(68B)-H(68D) | 108.4     |
| H(68C)-C(68B)-H(68D) | 107.5     |
| Cl(3)-C(69)-Cl(4)    | 106.6(8)  |
| Cl(3)-C(69)-H(69A)   | 110.4     |
| Cl(4)-C(69)-H(69A)   | 110.4     |
| Cl(3)-C(69)-H(69B)   | 110.4     |
| Cl(4)-C(69)-H(69B)   | 110.4     |
| H(69A)-C(69)-H(69B)  | 108.6     |
| Cl(3B)-C(69B)-Cl(4B) | 109.3(12) |
| Cl(3B)-C(69B)-H(69C) | 109.8     |
| Cl(4B)-C(69B)-H(69C) | 109.8     |
| Cl(3B)-C(69B)-H(69D) | 109.8     |
| Cl(4B)-C(69B)-H(69D) | 109.8     |
| H(69C)-C(69B)-H(69D) | 108.3     |

---

Symmetry transformations used to generate equivalent atoms:

**Table S10.** Anisotropic displacement parameters ( $\text{\AA}^2 \times 10^3$ ) for bm32zas. The anisotropic displacement factor exponent takes the form:  $-2p^2[ h^2 a^*2U^{11} + \dots + 2 h k a^* b^* U^{12} ]$

|       | U <sup>11</sup> | U <sup>22</sup> | U <sup>33</sup> | U <sup>23</sup> | U <sup>13</sup> | U <sup>12</sup> |
|-------|-----------------|-----------------|-----------------|-----------------|-----------------|-----------------|
| P(1)  | 29(1)           | 28(1)           | 25(1)           | -2(1)           | -8(1)           | -11(1)          |
| S(1)  | 44(1)           | 31(1)           | 30(1)           | 0(1)            | -11(1)          | -16(1)          |
| S(2)  | 36(1)           | 46(1)           | 31(1)           | 0(1)            | -12(1)          | -14(1)          |
| N(1)  | 26(2)           | 30(2)           | 28(2)           | -4(2)           | -7(2)           | -10(2)          |
| N(2)  | 27(2)           | 29(2)           | 36(2)           | -8(2)           | -5(2)           | -8(2)           |
| N(3)  | 43(2)           | 31(2)           | 30(2)           | -2(2)           | -13(2)          | -16(2)          |
| C(1)  | 41(3)           | 41(3)           | 27(2)           | 1(2)            | -13(2)          | -17(2)          |
| C(2)  | 55(3)           | 42(3)           | 40(3)           | -3(2)           | -15(3)          | -20(3)          |
| C(3)  | 66(4)           | 54(4)           | 52(4)           | -16(3)          | -18(3)          | -12(3)          |
| C(4)  | 52(4)           | 77(5)           | 45(3)           | -23(3)          | -10(3)          | -7(3)           |
| C(5)  | 45(4)           | 100(5)          | 48(4)           | -9(3)           | -5(3)           | -40(4)          |
| C(6)  | 49(3)           | 60(3)           | 39(3)           | -5(3)           | -11(3)          | -29(3)          |
| C(7)  | 30(2)           | 31(2)           | 26(2)           | -4(2)           | -7(2)           | -12(2)          |
| C(8)  | 30(2)           | 30(2)           | 24(2)           | -4(2)           | -6(2)           | -10(2)          |
| C(9)  | 37(3)           | 34(2)           | 28(2)           | -6(2)           | -4(2)           | -18(2)          |
| C(10) | 45(3)           | 45(3)           | 37(3)           | -7(2)           | -5(2)           | -25(2)          |
| C(11) | 52(4)           | 57(4)           | 55(4)           | -12(3)          | 4(3)            | -37(3)          |
| C(12) | 68(4)           | 41(3)           | 63(4)           | -6(3)           | 7(3)            | -34(3)          |
| C(13) | 60(4)           | 31(3)           | 51(3)           | -3(2)           | 1(3)            | -16(3)          |
| C(14) | 40(3)           | 31(2)           | 31(2)           | -2(2)           | -3(2)           | -12(2)          |
| C(15) | 42(3)           | 29(2)           | 40(3)           | 1(2)            | -14(2)          | -5(2)           |
| C(16) | 31(3)           | 36(3)           | 38(3)           | -3(2)           | -14(2)          | -8(2)           |
| C(17) | 25(2)           | 33(2)           | 33(2)           | -1(2)           | -6(2)           | -12(2)          |
| C(18) | 24(2)           | 35(2)           | 32(2)           | 1(2)            | -8(2)           | -15(2)          |
| C(19) | 30(2)           | 46(3)           | 31(2)           | 0(2)            | -8(2)           | -20(2)          |
| C(20) | 42(3)           | 57(3)           | 36(3)           | -9(2)           | -12(2)          | -20(3)          |
| C(21) | 58(4)           | 75(4)           | 44(3)           | -18(3)          | -16(3)          | -23(3)          |
| C(22) | 57(4)           | 108(6)          | 47(4)           | -8(4)           | -26(3)          | -34(4)          |
| C(23) | 39(3)           | 77(4)           | 49(3)           | 8(3)            | -22(3)          | -22(3)          |
| C(24) | 29(3)           | 56(3)           | 40(3)           | 6(2)            | -16(2)          | -19(2)          |
| C(25) | 25(2)           | 44(3)           | 49(3)           | 4(2)            | -11(2)          | -7(2)           |

|        |       |        |       |        |        |        |
|--------|-------|--------|-------|--------|--------|--------|
| C(26)  | 32(3) | 33(3)  | 47(3) | -4(2)  | -7(2)  | -8(2)  |
| C(27)  | 36(3) | 47(3)  | 41(3) | -14(2) | 3(2)   | -15(2) |
| C(28)  | 23(2) | 37(3)  | 38(3) | -4(2)  | -5(2)  | -9(2)  |
| C(29)  | 50(3) | 39(3)  | 38(3) | -8(2)  | -13(2) | -21(2) |
| C(30)  | 55(4) | 64(4)  | 55(3) | -1(3)  | -19(3) | -38(3) |
| C(31)  | 66(4) | 40(3)  | 46(3) | -11(2) | -13(3) | -21(3) |
| C(32)  | 43(7) | 35(4)  | 29(5) | 4(4)   | -11(5) | -18(4) |
| C(33)  | 44(7) | 48(6)  | 36(6) | 5(5)   | -15(6) | -15(5) |
| C(34)  | 54(8) | 50(8)  | 29(5) | -4(5)  | -9(5)  | -15(7) |
| C(32B) | 44(8) | 35(5)  | 30(6) | -3(4)  | -16(6) | -19(5) |
| C(33B) | 45(9) | 56(8)  | 47(8) | 6(7)   | -18(7) | -16(7) |
| C(34B) | 45(9) | 40(8)  | 39(8) | 8(6)   | -12(6) | -13(7) |
| B(1)   | 26(3) | 31(3)  | 28(3) | -1(2)  | -9(2)  | -12(2) |
| C(35)  | 24(2) | 27(2)  | 30(2) | -2(2)  | -12(2) | -6(2)  |
| C(36)  | 26(2) | 27(2)  | 30(2) | 2(2)   | -13(2) | -8(2)  |
| C(37)  | 28(2) | 30(2)  | 36(3) | -6(2)  | -14(2) | -6(2)  |
| C(38)  | 38(3) | 40(3)  | 29(2) | -8(2)  | -9(2)  | -14(2) |
| C(39)  | 35(3) | 40(3)  | 30(2) | -3(2)  | -8(2)  | -15(2) |
| C(40)  | 28(2) | 36(2)  | 30(2) | -6(2)  | -8(2)  | -15(2) |
| C(41)  | 38(3) | 36(3)  | 42(3) | -9(2)  | -16(2) | -12(2) |
| F(1)   | 50(2) | 75(2)  | 97(3) | -39(2) | -13(2) | -32(2) |
| F(2)   | 84(2) | 35(2)  | 86(2) | -7(2)  | -50(2) | -15(2) |
| F(3)   | 97(3) | 70(2)  | 48(2) | -14(2) | -27(2) | -42(2) |
| C(42)  | 58(4) | 65(4)  | 36(3) | -17(3) | 5(3)   | -37(3) |
| F(4)   | 81(5) | 86(5)  | 49(4) | -13(4) | -4(4)  | -49(4) |
| F(5)   | 59(4) | 82(5)  | 79(4) | 6(4)   | -15(3) | -49(4) |
| F(6)   | 72(5) | 49(4)  | 93(5) | 2(3)   | 15(4)  | -35(3) |
| F(4B)  | 40(4) | 54(4)  | 59(4) | -1(3)  | 8(3)   | -17(3) |
| F(5B)  | 95(5) | 101(6) | 72(5) | -25(4) | -7(4)  | -67(4) |
| F(6B)  | 72(5) | 79(5)  | 84(5) | 28(4)  | -10(4) | -44(4) |
| C(43)  | 28(2) | 30(2)  | 29(2) | -2(2)  | -9(2)  | -12(2) |
| C(44)  | 28(2) | 30(2)  | 29(2) | -3(2)  | -8(2)  | -10(2) |
| C(45)  | 28(2) | 32(2)  | 38(3) | -4(2)  | -8(2)  | -11(2) |
| C(46)  | 34(3) | 50(3)  | 44(3) | -5(2)  | -2(2)  | -22(2) |
| C(47)  | 38(3) | 53(3)  | 34(3) | -4(2)  | -3(2)  | -22(3) |
| C(48)  | 33(3) | 44(3)  | 31(2) | -4(2)  | -8(2)  | -17(2) |
| C(49)  | 33(3) | 36(3)  | 51(3) | -7(2)  | -13(2) | -14(2) |
| F(7)   | 39(2) | 92(3)  | 71(2) | -3(2)  | -16(2) | -36(2) |

|        |        |        |        |        |        |        |
|--------|--------|--------|--------|--------|--------|--------|
| F(8)   | 76(2)  | 48(2)  | 103(3) | -21(2) | -53(2) | -13(2) |
| F(9)   | 50(2)  | 57(2)  | 55(2)  | 4(2)   | -29(2) | -25(2) |
| C(50)  | 63(4)  | 97(5)  | 39(3)  | -12(3) | 4(3)   | -46(4) |
| F(10)  | 128(4) | 133(4) | 57(2)  | -34(2) | -5(2)  | -67(3) |
| F(11)  | 71(3)  | 128(3) | 47(2)  | 0(2)   | 3(2)   | -53(2) |
| F(12)  | 89(3)  | 125(3) | 56(2)  | 21(2)  | -28(2) | -38(3) |
| C(51)  | 28(2)  | 31(2)  | 24(2)  | -2(2)  | -8(2)  | -12(2) |
| C(52)  | 28(2)  | 34(2)  | 26(2)  | -4(2)  | -7(2)  | -14(2) |
| C(53)  | 34(3)  | 31(2)  | 28(2)  | -1(2)  | -11(2) | -11(2) |
| C(54)  | 31(2)  | 36(3)  | 31(2)  | 2(2)   | -13(2) | -9(2)  |
| C(55)  | 29(2)  | 40(3)  | 31(2)  | 2(2)   | -13(2) | -16(2) |
| C(56)  | 33(2)  | 31(2)  | 29(2)  | 5(2)   | -13(2) | -14(2) |
| C(57)  | 40(3)  | 38(3)  | 37(3)  | 4(2)   | -14(2) | -13(2) |
| F(13)  | 116(4) | 42(2)  | 58(3)  | -5(2)  | -7(3)  | -34(2) |
| F(14)  | 43(2)  | 66(3)  | 90(3)  | 39(2)  | -7(2)  | -24(2) |
| F(15)  | 98(3)  | 65(3)  | 67(3)  | 33(2)  | -55(3) | -45(2) |
| F(13B) | 78(8)  | 71(8)  | 81(8)  | 2(6)   | -17(6) | -29(6) |
| F(14B) | 66(8)  | 53(7)  | 66(8)  | 5(5)   | -21(5) | -32(5) |
| F(15B) | 91(9)  | 79(8)  | 80(8)  | 2(6)   | -16(6) | -34(6) |
| C(58)  | 41(3)  | 49(3)  | 46(3)  | 10(2)  | -24(3) | -23(3) |
| F(16)  | 57(2)  | 83(3)  | 130(3) | 43(2)  | -62(2) | -39(2) |
| F(17)  | 77(2)  | 95(3)  | 61(2)  | -16(2) | -15(2) | -60(2) |
| F(18)  | 47(2)  | 70(2)  | 50(2)  | 3(2)   | -11(2) | -38(2) |
| C(59)  | 25(2)  | 35(2)  | 27(2)  | -2(2)  | -8(2)  | -13(2) |
| C(60)  | 27(2)  | 42(3)  | 30(2)  | -7(2)  | -7(2)  | -14(2) |
| C(61)  | 37(3)  | 44(3)  | 36(3)  | -16(2) | -5(2)  | -17(2) |
| C(62)  | 36(3)  | 35(3)  | 47(3)  | -10(2) | -8(2)  | -14(2) |
| C(63)  | 32(3)  | 32(2)  | 40(3)  | -3(2)  | -11(2) | -11(2) |
| C(64)  | 31(2)  | 32(2)  | 31(2)  | -4(2)  | -11(2) | -12(2) |
| C(65)  | 56(4)  | 51(3)  | 49(3)  | -20(3) | -12(3) | -20(3) |
| F(19)  | 82(4)  | 109(5) | 39(3)  | -22(3) | -4(3)  | -58(4) |
| F(20)  | 69(4)  | 125(5) | 87(4)  | -54(4) | -28(3) | -36(3) |
| F(21)  | 158(6) | 75(4)  | 95(4)  | -30(3) | -51(4) | -40(4) |
| F(19B) | 82(6)  | 106(6) | 90(6)  | -56(5) | -20(5) | -30(5) |
| F(20B) | 121(7) | 89(6)  | 80(6)  | -23(4) | -44(5) | -34(5) |
| F(21B) | 79(6)  | 92(6)  | 76(5)  | -22(4) | -14(4) | -61(5) |
| C(66)  | 49(3)  | 32(3)  | 56(4)  | 3(2)   | -19(3) | -12(2) |
| F(22)  | 120(6) | 54(4)  | 87(5)  | 17(3)  | -46(4) | -40(4) |

|        |         |         |         |        |        |        |
|--------|---------|---------|---------|--------|--------|--------|
| F(23)  | 92(5)   | 65(4)   | 42(3)   | 8(3)   | -21(3) | 3(3)   |
| F(24)  | 57(4)   | 99(5)   | 73(5)   | 26(4)  | -33(3) | -21(4) |
| F(22B) | 80(5)   | 56(4)   | 68(5)   | 0(3)   | -26(4) | 9(4)   |
| F(23B) | 79(5)   | 108(6)  | 75(5)   | 40(4)  | -21(4) | -35(4) |
| F(24B) | 101(6)  | 67(5)   | 77(5)   | 4(4)   | -56(4) | -34(4) |
| C(68)  | 123(8)  | 106(8)  | 121(8)  | -15(7) | -27(7) | -35(6) |
| Cl(1)  | 124(5)  | 96(4)   | 139(6)  | -30(4) | -24(4) | -57(4) |
| Cl(2)  | 221(8)  | 146(6)  | 166(7)  | -53(5) | -56(6) | -60(5) |
| C(68B) | 129(8)  | 104(8)  | 126(9)  | -26(8) | -29(8) | -35(7) |
| Cl(1B) | 103(6)  | 117(7)  | 154(9)  | -20(6) | -20(6) | -18(5) |
| Cl(2B) | 152(6)  | 66(4)   | 135(8)  | -14(4) | 13(6)  | -43(4) |
| C(69)  | 80(6)   | 82(6)   | 75(6)   | -4(5)  | -23(5) | -26(5) |
| Cl(3)  | 67(2)   | 59(2)   | 67(2)   | 6(1)   | -38(2) | -27(2) |
| Cl(4)  | 90(3)   | 120(4)  | 89(3)   | 11(3)  | -17(2) | -12(3) |
| C(69B) | 99(7)   | 107(7)  | 97(7)   | -6(5)  | -30(5) | -31(5) |
| Cl(3B) | 278(10) | 275(10) | 278(10) | -21(6) | -74(6) | -93(6) |
| Cl(4B) | 168(6)  | 156(6)  | 171(6)  | 8(4)   | -30(4) | -76(4) |

**Table S11.** Hydrogen coordinates ( $\times 10^4$ ) and isotropic displacement parameters ( $\text{\AA}^2 \times 10^{-3}$ ) for bm32zas.

|        | x    | y    | z    | U(eq) |
|--------|------|------|------|-------|
| H(2A)  | 3504 | 4394 | 4116 | 54    |
| H(3A)  | 1959 | 5158 | 5008 | 70    |
| H(4A)  | 674  | 4455 | 5511 | 74    |
| H(5A)  | 925  | 2999 | 5137 | 74    |
| H(6A)  | 2499 | 2204 | 4265 | 56    |
| H(10A) | 6331 | 5790 | 1945 | 49    |
| H(11A) | 6670 | 7206 | 1517 | 63    |
| H(12A) | 5378 | 8642 | 1161 | 70    |
| H(13A) | 3751 | 8656 | 1204 | 62    |
| H(15A) | 2540 | 7773 | 1440 | 48    |
| H(16A) | 2204 | 6355 | 1777 | 43    |
| H(20A) | 4657 | 5944 | 3297 | 52    |
| H(21A) | 5228 | 5887 | 4294 | 68    |

|        |       |       |      |    |
|--------|-------|-------|------|----|
| H(22A) | 6599  | 4497  | 4622 | 79 |
| H(23)  | 7349  | 3150  | 3984 | 66 |
| H(25A) | 7487  | 2329  | 2958 | 51 |
| H(26A) | 6823  | 2301  | 2047 | 48 |
| H(27A) | 6686  | 3213  | 757  | 65 |
| H(27B) | 5716  | 3269  | 496  | 65 |
| H(27C) | 6188  | 2385  | 1070 | 65 |
| H(28A) | 2023  | 5160  | 3109 | 51 |
| H(28B) | 2183  | 4126  | 2912 | 51 |
| H(28C) | 1756  | 5098  | 2387 | 51 |
| H(29A) | 3286  | 2931  | 554  | 47 |
| H(30A) | 1917  | 3131  | 1679 | 78 |
| H(30B) | 2707  | 2187  | 2044 | 78 |
| H(30C) | 2339  | 2091  | 1380 | 78 |
| H(31A) | 5027  | 1981  | 496  | 75 |
| H(31B) | 4323  | 1317  | 755  | 75 |
| H(31C) | 4709  | 1572  | 1344 | 75 |
| H(32A) | 3615  | 4959  | 807  | 42 |
| H(33A) | 2083  | 5564  | 400  | 66 |
| H(33B) | 1831  | 5011  | 1208 | 66 |
| H(33C) | 2062  | 4492  | 502  | 66 |
| H(34A) | 3854  | 4835  | -483 | 70 |
| H(34B) | 4102  | 3691  | -259 | 70 |
| H(34C) | 4861  | 4165  | -173 | 70 |
| H(32B) | 3177  | 5048  | 943  | 40 |
| H(33D) | 1704  | 5439  | 523  | 76 |
| H(33E) | 1551  | 4817  | 1311 | 76 |
| H(33F) | 1891  | 4309  | 579  | 76 |
| H(34D) | 3555  | 5145  | -325 | 66 |
| H(34E) | 3760  | 4014  | -289 | 66 |
| H(34F) | 4557  | 4323  | -73  | 66 |
| H(36A) | 187   | -957  | 1553 | 33 |
| H(38A) | 2215  | -668  | -455 | 42 |
| H(40A) | 1657  | 942   | 1149 | 36 |
| H(44A) | -1412 | 310   | 1925 | 35 |
| H(46A) | -3472 | -15   | 3899 | 51 |
| H(48A) | -732  | 211   | 3804 | 42 |
| H(52A) | 638   | -1385 | 3208 | 34 |



|        |      |       |      |     |
|--------|------|-------|------|-----|
| H(54A) | 3420 | -1939 | 3636 | 40  |
| H(56A) | 2106 | 545   | 2406 | 37  |
| H(60A) | 297  | 1549  | 3271 | 39  |
| H(62A) | -780 | 4305  | 2282 | 46  |
| H(64A) | -446 | 2009  | 1359 | 37  |
| H(68A) | 8725 | 6473  | 3162 | 144 |
| H(68B) | 8257 | 7499  | 2711 | 144 |
| H(68C) | 8323 | 7226  | 2582 | 145 |
| H(68D) | 8862 | 7813  | 1882 | 145 |
| H(69A) | 5676 | 8557  | 4933 | 97  |
| H(69B) | 5038 | 8959  | 4315 | 97  |
| H(69C) | 6373 | 7842  | 4543 | 124 |
| H(69D) | 5560 | 8595  | 4085 | 124 |

**Table S12.** Torsion angles [°] for bm32zas.

|                      |             |
|----------------------|-------------|
| N(3)-P(1)-S(1)-S(2)  | -175.10(17) |
| N(1)-P(1)-S(1)-S(2)  | -52.17(16)  |
| N(2)-P(1)-S(1)-S(2)  | 62.80(17)   |
| P(1)-S(1)-S(2)-C(1)  | 95.99(18)   |
| N(3)-P(1)-N(1)-C(7)  | -92.7(4)    |
| N(2)-P(1)-N(1)-C(7)  | 28.2(4)     |
| S(1)-P(1)-N(1)-C(7)  | 149.2(3)    |
| N(3)-P(1)-N(1)-C(28) | 66.5(4)     |
| N(2)-P(1)-N(1)-C(28) | -172.6(3)   |
| S(1)-P(1)-N(1)-C(28) | -51.6(3)    |
| N(3)-P(1)-N(2)-C(17) | -179.9(3)   |
| N(1)-P(1)-N(2)-C(17) | 57.1(3)     |
| S(1)-P(1)-N(2)-C(17) | -60.3(3)    |
| N(3)-P(1)-N(2)-C(27) | -35.8(4)    |
| N(1)-P(1)-N(2)-C(27) | -158.8(4)   |
| S(1)-P(1)-N(2)-C(27) | 83.8(4)     |
| N(1)-P(1)-N(3)-C(29) | -134.2(4)   |
| N(2)-P(1)-N(3)-C(29) | 108.7(4)    |
| S(1)-P(1)-N(3)-C(29) | -15.0(5)    |
| N(1)-P(1)-N(3)-C(32) | 49.9(11)    |
| N(2)-P(1)-N(3)-C(32) | -67.2(11)   |

|                         |           |
|-------------------------|-----------|
| S(1)-P(1)-N(3)-C(32)    | 169.1(11) |
| N(1)-P(1)-N(3)-C(32B)   | 34.0(15)  |
| N(2)-P(1)-N(3)-C(32B)   | -83.1(15) |
| S(1)-P(1)-N(3)-C(32B)   | 153.1(15) |
| S(1)-S(2)-C(1)-C(6)     | 58.3(4)   |
| S(1)-S(2)-C(1)-C(2)     | -126.0(4) |
| C(6)-C(1)-C(2)-C(3)     | 0.3(8)    |
| S(2)-C(1)-C(2)-C(3)     | -175.5(4) |
| C(1)-C(2)-C(3)-C(4)     | -0.8(8)   |
| C(2)-C(3)-C(4)-C(5)     | 0.2(9)    |
| C(3)-C(4)-C(5)-C(6)     | 0.7(10)   |
| C(2)-C(1)-C(6)-C(5)     | 0.6(8)    |
| S(2)-C(1)-C(6)-C(5)     | 176.3(4)  |
| C(4)-C(5)-C(6)-C(1)     | -1.1(9)   |
| C(28)-N(1)-C(7)-C(8)    | 137.1(4)  |
| P(1)-N(1)-C(7)-C(8)     | -63.5(5)  |
| C(28)-N(1)-C(7)-C(16)   | -41.6(6)  |
| P(1)-N(1)-C(7)-C(16)    | 117.9(4)  |
| C(16)-C(7)-C(8)-C(9)    | -4.5(7)   |
| N(1)-C(7)-C(8)-C(9)     | 176.8(4)  |
| C(16)-C(7)-C(8)-C(18)   | 178.2(4)  |
| N(1)-C(7)-C(8)-C(18)    | -0.4(6)   |
| C(7)-C(8)-C(9)-C(10)    | -173.1(4) |
| C(18)-C(8)-C(9)-C(10)   | 4.2(7)    |
| C(7)-C(8)-C(9)-C(14)    | 5.5(6)    |
| C(18)-C(8)-C(9)-C(14)   | -177.2(4) |
| C(14)-C(9)-C(10)-C(11)  | 1.3(7)    |
| C(8)-C(9)-C(10)-C(11)   | 180.0(5)  |
| C(9)-C(10)-C(11)-C(12)  | 0.2(8)    |
| C(10)-C(11)-C(12)-C(13) | -1.0(9)   |
| C(11)-C(12)-C(13)-C(14) | 0.1(9)    |
| C(12)-C(13)-C(14)-C(15) | -176.4(5) |
| C(12)-C(13)-C(14)-C(9)  | 1.5(8)    |
| C(10)-C(9)-C(14)-C(15)  | 175.8(5)  |
| C(8)-C(9)-C(14)-C(15)   | -2.9(7)   |
| C(10)-C(9)-C(14)-C(13)  | -2.2(7)   |
| C(8)-C(9)-C(14)-C(13)   | 179.2(5)  |
| C(13)-C(14)-C(15)-C(16) | 177.0(5)  |

|                         |           |
|-------------------------|-----------|
| C(9)-C(14)-C(15)-C(16)  | -0.9(7)   |
| C(14)-C(15)-C(16)-C(7)  | 2.0(8)    |
| C(8)-C(7)-C(16)-C(15)   | 0.8(7)    |
| N(1)-C(7)-C(16)-C(15)   | 179.5(4)  |
| C(27)-N(2)-C(17)-C(18)  | 142.9(4)  |
| P(1)-N(2)-C(17)-C(18)   | -71.8(5)  |
| C(27)-N(2)-C(17)-C(26)  | -39.0(6)  |
| P(1)-N(2)-C(17)-C(26)   | 106.4(4)  |
| C(26)-C(17)-C(18)-C(19) | -7.6(7)   |
| N(2)-C(17)-C(18)-C(19)  | 170.5(4)  |
| C(26)-C(17)-C(18)-C(8)  | 173.2(4)  |
| N(2)-C(17)-C(18)-C(8)   | -8.7(6)   |
| C(7)-C(8)-C(18)-C(17)   | 55.8(6)   |
| C(9)-C(8)-C(18)-C(17)   | -121.4(5) |
| C(7)-C(8)-C(18)-C(19)   | -123.4(5) |
| C(9)-C(8)-C(18)-C(19)   | 59.4(6)   |
| C(17)-C(18)-C(19)-C(20) | -171.9(5) |
| C(8)-C(18)-C(19)-C(20)  | 7.4(7)    |
| C(17)-C(18)-C(19)-C(24) | 6.2(6)    |
| C(8)-C(18)-C(19)-C(24)  | -174.6(4) |
| C(24)-C(19)-C(20)-C(21) | 1.3(8)    |
| C(18)-C(19)-C(20)-C(21) | 179.3(5)  |
| C(19)-C(20)-C(21)-C(22) | 0.2(9)    |
| C(20)-C(21)-C(22)-C(23) | -1.4(10)  |
| C(21)-C(22)-C(23)-C(24) | 0.9(10)   |
| C(22)-C(23)-C(24)-C(25) | -178.6(6) |
| C(22)-C(23)-C(24)-C(19) | 0.6(9)    |
| C(20)-C(19)-C(24)-C(23) | -1.7(7)   |
| C(18)-C(19)-C(24)-C(23) | -179.8(5) |
| C(20)-C(19)-C(24)-C(25) | 177.6(5)  |
| C(18)-C(19)-C(24)-C(25) | -0.5(7)   |
| C(23)-C(24)-C(25)-C(26) | 175.2(5)  |
| C(19)-C(24)-C(25)-C(26) | -4.0(8)   |
| C(24)-C(25)-C(26)-C(17) | 2.8(8)    |
| C(18)-C(17)-C(26)-C(25) | 3.2(7)    |
| N(2)-C(17)-C(26)-C(25)  | -174.9(4) |
| C(32)-N(3)-C(29)-C(31)  | 116.4(12) |
| C(32B)-N(3)-C(29)-C(31) | 132.0(14) |

|                          |            |
|--------------------------|------------|
| P(1)-N(3)-C(29)-C(31)    | -59.4(6)   |
| C(32)-N(3)-C(29)-C(30)   | -112.0(12) |
| C(32B)-N(3)-C(29)-C(30)  | -96.5(15)  |
| P(1)-N(3)-C(29)-C(30)    | 72.2(6)    |
| C(29)-N(3)-C(32)-C(34)   | -56.9(17)  |
| C(32B)-N(3)-C(32)-C(34)  | -132(7)    |
| P(1)-N(3)-C(32)-C(34)    | 119.5(11)  |
| C(29)-N(3)-C(32)-C(33)   | 67.3(14)   |
| C(32B)-N(3)-C(32)-C(33)  | -8(5)      |
| P(1)-N(3)-C(32)-C(33)    | -116.3(11) |
| C(29)-N(3)-C(32B)-C(33B) | 53(2)      |
| C(32)-N(3)-C(32B)-C(33B) | 165(7)     |
| P(1)-N(3)-C(32B)-C(33B)  | -116.7(15) |
| C(29)-N(3)-C(32B)-C(34B) | -74(2)     |
| C(32)-N(3)-C(32B)-C(34B) | 37(6)      |
| P(1)-N(3)-C(32B)-C(34B)  | 116.1(14)  |
| C(43)-B(1)-C(35)-C(40)   | 158.6(4)   |
| C(51)-B(1)-C(35)-C(40)   | -80.0(5)   |
| C(59)-B(1)-C(35)-C(40)   | 40.3(5)    |
| C(43)-B(1)-C(35)-C(36)   | -28.2(6)   |
| C(51)-B(1)-C(35)-C(36)   | 93.2(5)    |
| C(59)-B(1)-C(35)-C(36)   | -146.5(4)  |
| C(40)-C(35)-C(36)-C(37)  | -3.4(6)    |
| B(1)-C(35)-C(36)-C(37)   | -176.8(4)  |
| C(35)-C(36)-C(37)-C(38)  | 2.8(7)     |
| C(35)-C(36)-C(37)-C(41)  | -179.3(4)  |
| C(36)-C(37)-C(38)-C(39)  | -0.4(7)    |
| C(41)-C(37)-C(38)-C(39)  | -178.2(4)  |
| C(37)-C(38)-C(39)-C(40)  | -1.2(7)    |
| C(37)-C(38)-C(39)-C(42)  | 179.1(4)   |
| C(38)-C(39)-C(40)-C(35)  | 0.4(7)     |
| C(42)-C(39)-C(40)-C(35)  | -179.9(4)  |
| C(36)-C(35)-C(40)-C(39)  | 1.8(6)     |
| B(1)-C(35)-C(40)-C(39)   | 175.8(4)   |
| C(38)-C(37)-C(41)-F(1)   | -142.3(5)  |
| C(36)-C(37)-C(41)-F(1)   | 39.8(6)    |
| C(38)-C(37)-C(41)-F(2)   | 96.4(5)    |
| C(36)-C(37)-C(41)-F(2)   | -81.5(6)   |

|                         |           |
|-------------------------|-----------|
| C(38)-C(37)-C(41)-F(3)  | -21.6(6)  |
| C(36)-C(37)-C(41)-F(3)  | 160.5(4)  |
| C(40)-C(39)-C(42)-F(5B) | 17.5(10)  |
| C(38)-C(39)-C(42)-F(5B) | -162.8(8) |
| C(40)-C(39)-C(42)-F(4)  | 179.5(7)  |
| C(38)-C(39)-C(42)-F(4)  | -0.8(10)  |
| C(40)-C(39)-C(42)-F(6)  | -41.2(9)  |
| C(38)-C(39)-C(42)-F(6)  | 138.4(7)  |
| C(40)-C(39)-C(42)-F(4B) | 149.5(7)  |
| C(38)-C(39)-C(42)-F(4B) | -30.8(8)  |
| C(40)-C(39)-C(42)-F(6B) | -99.2(7)  |
| C(38)-C(39)-C(42)-F(6B) | 80.5(7)   |
| C(40)-C(39)-C(42)-F(5)  | 65.3(7)   |
| C(38)-C(39)-C(42)-F(5)  | -115.0(6) |
| C(35)-B(1)-C(43)-C(44)  | -25.1(6)  |
| C(51)-B(1)-C(43)-C(44)  | -143.0(4) |
| C(59)-B(1)-C(43)-C(44)  | 96.0(5)   |
| C(35)-B(1)-C(43)-C(48)  | 158.9(4)  |
| C(51)-B(1)-C(43)-C(48)  | 41.0(6)   |
| C(59)-B(1)-C(43)-C(48)  | -80.0(5)  |
| C(48)-C(43)-C(44)-C(45) | -2.2(7)   |
| B(1)-C(43)-C(44)-C(45)  | -178.4(4) |
| C(43)-C(44)-C(45)-C(46) | 1.0(7)    |
| C(43)-C(44)-C(45)-C(49) | -176.0(4) |
| C(44)-C(45)-C(46)-C(47) | 0.7(8)    |
| C(49)-C(45)-C(46)-C(47) | 177.6(5)  |
| C(45)-C(46)-C(47)-C(48) | -0.9(8)   |
| C(45)-C(46)-C(47)-C(50) | -177.5(6) |
| C(46)-C(47)-C(48)-C(43) | -0.4(8)   |
| C(50)-C(47)-C(48)-C(43) | 176.2(5)  |
| C(44)-C(43)-C(48)-C(47) | 1.9(7)    |
| B(1)-C(43)-C(48)-C(47)  | 178.3(5)  |
| C(46)-C(45)-C(49)-F(7)  | 18.6(7)   |
| C(44)-C(45)-C(49)-F(7)  | -164.4(4) |
| C(46)-C(45)-C(49)-F(9)  | 139.7(5)  |
| C(44)-C(45)-C(49)-F(9)  | -43.3(6)  |
| C(46)-C(45)-C(49)-F(8)  | -101.3(6) |
| C(44)-C(45)-C(49)-F(8)  | 75.7(6)   |

|                          |            |
|--------------------------|------------|
| C(46)-C(47)-C(50)-F(10)  | -126.0(7)  |
| C(48)-C(47)-C(50)-F(10)  | 57.4(8)    |
| C(46)-C(47)-C(50)-F(11)  | -1.6(9)    |
| C(48)-C(47)-C(50)-F(11)  | -178.1(6)  |
| C(46)-C(47)-C(50)-F(12)  | 117.4(6)   |
| C(48)-C(47)-C(50)-F(12)  | -59.2(8)   |
| C(35)-B(1)-C(51)-C(56)   | 81.1(5)    |
| C(43)-B(1)-C(51)-C(56)   | -154.1(4)  |
| C(59)-B(1)-C(51)-C(56)   | -37.6(6)   |
| C(35)-B(1)-C(51)-C(52)   | -94.2(5)   |
| C(43)-B(1)-C(51)-C(52)   | 30.6(6)    |
| C(59)-B(1)-C(51)-C(52)   | 147.1(4)   |
| C(56)-C(51)-C(52)-C(53)  | 1.5(7)     |
| B(1)-C(51)-C(52)-C(53)   | 177.1(4)   |
| C(51)-C(52)-C(53)-C(54)  | -1.3(7)    |
| C(51)-C(52)-C(53)-C(57)  | 178.6(4)   |
| C(52)-C(53)-C(54)-C(55)  | 0.0(7)     |
| C(57)-C(53)-C(54)-C(55)  | -179.8(4)  |
| C(53)-C(54)-C(55)-C(56)  | 0.8(7)     |
| C(53)-C(54)-C(55)-C(58)  | 179.0(5)   |
| C(54)-C(55)-C(56)-C(51)  | -0.5(7)    |
| C(58)-C(55)-C(56)-C(51)  | -178.7(5)  |
| C(52)-C(51)-C(56)-C(55)  | -0.7(7)    |
| B(1)-C(51)-C(56)-C(55)   | -176.2(4)  |
| C(54)-C(53)-C(57)-F(14)  | 147.9(5)   |
| C(52)-C(53)-C(57)-F(14)  | -31.9(7)   |
| C(54)-C(53)-C(57)-F(13B) | -38.5(15)  |
| C(52)-C(53)-C(57)-F(13B) | 141.6(14)  |
| C(54)-C(53)-C(57)-F(15B) | 81.9(15)   |
| C(52)-C(53)-C(57)-F(15B) | -97.9(15)  |
| C(54)-C(53)-C(57)-F(14B) | -158.6(13) |
| C(52)-C(53)-C(57)-F(14B) | 21.6(14)   |
| C(54)-C(53)-C(57)-F(13)  | -89.7(6)   |
| C(52)-C(53)-C(57)-F(13)  | 90.5(6)    |
| C(54)-C(53)-C(57)-F(15)  | 27.2(7)    |
| C(52)-C(53)-C(57)-F(15)  | -152.7(5)  |
| C(54)-C(55)-C(58)-F(16)  | 13.8(7)    |
| C(56)-C(55)-C(58)-F(16)  | -168.0(5)  |

|                          |           |
|--------------------------|-----------|
| C(54)-C(55)-C(58)-F(18)  | 136.1(5)  |
| C(56)-C(55)-C(58)-F(18)  | -45.7(7)  |
| C(54)-C(55)-C(58)-F(17)  | -106.2(5) |
| C(56)-C(55)-C(58)-F(17)  | 72.1(6)   |
| C(35)-B(1)-C(59)-C(60)   | -147.8(4) |
| C(43)-B(1)-C(59)-C(60)   | 87.4(5)   |
| C(51)-B(1)-C(59)-C(60)   | -32.5(6)  |
| C(35)-B(1)-C(59)-C(64)   | 36.7(6)   |
| C(43)-B(1)-C(59)-C(64)   | -88.1(5)  |
| C(51)-B(1)-C(59)-C(64)   | 152.1(4)  |
| C(64)-C(59)-C(60)-C(61)  | -0.9(7)   |
| B(1)-C(59)-C(60)-C(61)   | -176.6(4) |
| C(59)-C(60)-C(61)-C(62)  | 0.0(8)    |
| C(59)-C(60)-C(61)-C(65)  | -177.2(4) |
| C(60)-C(61)-C(62)-C(63)  | 0.4(7)    |
| C(65)-C(61)-C(62)-C(63)  | 177.7(5)  |
| C(61)-C(62)-C(63)-C(64)  | 0.0(7)    |
| C(61)-C(62)-C(63)-C(66)  | -179.6(5) |
| C(62)-C(63)-C(64)-C(59)  | -1.0(8)   |
| C(66)-C(63)-C(64)-C(59)  | 178.6(4)  |
| C(60)-C(59)-C(64)-C(63)  | 1.4(7)    |
| B(1)-C(59)-C(64)-C(63)   | 177.2(4)  |
| C(62)-C(61)-C(65)-F(21B) | -57.9(10) |
| C(60)-C(61)-C(65)-F(21B) | 119.4(9)  |
| C(62)-C(61)-C(65)-F(19)  | 123.8(6)  |
| C(60)-C(61)-C(65)-F(19)  | -58.9(7)  |
| C(62)-C(61)-C(65)-F(20)  | -112.5(7) |
| C(60)-C(61)-C(65)-F(20)  | 64.8(7)   |
| C(62)-C(61)-C(65)-F(19B) | 63.2(10)  |
| C(60)-C(61)-C(65)-F(19B) | -119.4(9) |
| C(62)-C(61)-C(65)-F(21)  | 1.4(8)    |
| C(60)-C(61)-C(65)-F(21)  | 178.8(7)  |
| C(62)-C(61)-C(65)-F(20B) | 177.9(9)  |
| C(60)-C(61)-C(65)-F(20B) | -4.8(10)  |
| C(64)-C(63)-C(66)-F(24B) | 29.0(9)   |
| C(62)-C(63)-C(66)-F(24B) | -151.4(8) |
| C(64)-C(63)-C(66)-F(22)  | -163.8(8) |
| C(62)-C(63)-C(66)-F(22)  | 15.8(9)   |

|                          |           |
|--------------------------|-----------|
| C(64)-C(63)-C(66)-F(23B) | -95.0(9)  |
| C(62)-C(63)-C(66)-F(23B) | 84.6(9)   |
| C(64)-C(63)-C(66)-F(24)  | 72.3(8)   |
| C(62)-C(63)-C(66)-F(24)  | -108.0(8) |
| C(64)-C(63)-C(66)-F(22B) | 149.9(8)  |
| C(62)-C(63)-C(66)-F(22B) | -30.5(9)  |
| C(64)-C(63)-C(66)-F(23)  | -42.3(8)  |
| C(62)-C(63)-C(66)-F(23)  | 137.3(7)  |

---

Symmetry transformations used to generate equivalent atoms:

**Table S13.** Hydrogen bonds for bm32zas [ $\text{\AA}$  and  $^\circ$ ].

---

| D-H...A | d(D-H) | d(H...A) | d(D...A) | $\angle$ (DHA) |
|---------|--------|----------|----------|----------------|
|---------|--------|----------|----------|----------------|

---



## References

- (1) Armarego, W. L. F. & Chai, C. L. L. *Purification of Laboratory Chemicals*, 6<sup>th</sup> Ed.; p. 159 (Elsevier: Oxford, 2009)
- (2) Denmark, S. E. & Wilson T. W. Construction of quaternary stereogenic carbon centers by the Lewis base catalyzed conjugate addition of silyl ketene imines to  $\alpha,\beta$ -unsaturated aldehydes and ketones. *Synlett*, 1723–1728 (2010).
- (3) Logan, A. W. J., Parker, J. S., Hallside, M. S. & Burton, J. W. Manganese(III) acetate mediated oxidative radical cyclizations. toward vicinal all-carbon quaternary stereocenters. *Org. Lett* **14**, 2940–2943 (2012).
- (4) Mimmi, M. C., Gullotti, M., Santagostini, L., Pagliarin, R., De Gioia, L., Monzani, E. & Casella, L. Synthesis and conformational studies of a chiral octadentate ligand derived from (*R*)-1,1'-binaphthyl-2,2'-diamine and its dinuclear zinc(II) and nickel(II) complexes. *Eur. J. Inorg. Chem.*, 3934–3934 (2003).
- (5) Nurminen, E. J., Mattinen, J. K. & Lönnberg, H. Kinetics and mechanism of tetrazole-catalyzed phosphoramidite alcoholysis. *J. Chem. Soc., Perkin Trans. 2*, 1621–1628 (1998).
- (6) Kal'yan, Y. B., Krimer, M. Z., Cherepanova, E. G., Bogdanov, V. S. & Smit, V. A. Arylthiosulfonium salts as transfer agents of the S-aryl group to double bonds. *Russ. Chem. Bull.* **31**, 342–349 (1982).
- (7) Smith, C. R., Zhang, A., Mans, D. J. & RajanBabu, T. V. (*R*)-3-Methyl-3-phenyl-1-pentene via catalytic asymmetric hydrovinylation. *Org. Synth.* **85**, 248–266 (2008).
- (8) Barrett, A. G. M., Dhanak, D., Graboski, G. G. & Taylor, S. J. (Phenylthio)nitromethane. *Org. Synth.* **68**, 8–11 (1990).
- (9) 1-bromo-2,6-diethylbenzene was prepared following a procedure described for the synthesis of 1-bromo-2,6-diisopropylbenzene.<sup>10</sup>
- (10) Wallasch, M. W., Weismann, D., Riehn, C., Ambrus, S., Wolmershäuser, G., Lagutschenkov, A., Niedner-Schatteburg, G. & Sitzmann, H. Reactive sigma-aryliron complexes or iron-promoted coupling of two phenyl anions to one bis(cyclohexadienylidene) ligand: synthesis, structure, mass spectrometry, and DFT calculations. *Organometallics* **29**, 806–813 (2010).

- (11) Diemer, V., Chaumeil, H., Defoin, A., Fort, A., Boeglin, A. & Carré, C. Syntheses of sterically hindered pyridinium phenoxides as model compounds in nonlinear optics. *Eur. J. Org. Chem.*, 2727–2738 (2006).
- (12) Milne, J. E. & Buchwald, S. L. An extremely active catalyst for the Negishi cross-coupling reaction. *J. Am. Chem. Soc.* **126**, 13028–13023 (2004).
- (13) Nakayama, J., Duan, S. & Hoshino, M. Reaction of 1,8-dehydronaphthalene with carbon disulphide. *J. Chem. Soc., Perkin Trans. 1*, 413–414 (1981).
- (14) The ester precursor was prepared using the method of Johnson: Johnson, W. S., Werthemann, L., Bartlett, W. R., Brocksom, T. J., Li, T., Faulkner, D. J. & Petersen, M. R. Simple stereoselective version of the Claisen rearrangement leading to trans-trisubstituted olefinic bonds. Synthesis of squalene. *J. Am. Chem. Soc.* **92**, 741–743 (1970). Reduction to the alcohol was carried out following a literature procedure: Hashem, A. & Weyerstahl, P. Reactivity of 1-cyclopropene-1-lactones dependent on the substitution degree. *Tetrahedron* **40**, 2003–2009 (1984). However, in contrast to the original procedure, the reduction was conducted at room temperature, not at reflux.
- (15) Denmark, S. E. & Chi, H. M. Catalytic, Enantioselective Intramolecular Sulfenoamination of Olefins. *J. Am. Chem. Soc.* **136**, dx.doi.org/10.1021/ja5046296 |(2014).
- (16) Denmark, S. E., Kornfilt, D. J. P. & Vogler, T. Catalytic asymmetric thiofunctionalization of unactivated alkenes. *J. Am. Chem. Soc.* **133**, 15308–15311 (2011).
- (17) Rundel, W. Notiz über die Darstellung tert.-butylierter Thiophenole, Diphenylsulfide und Thianthrene. *Chem. Ber* **101**, 2956–2962 (1968).
- (18) Kessler, H. & Rundel, W. Nachweis innermolekularer Beweglichkeit durch NMR-Spektroskopie, VI. Konformationen und gehinderte Rotation in Disulfiden und Diseleniden. *Chem. Ber.* **101**, 3350–3357 (1968).
- (19) Novakova, V., Miletin, M., Filandrova, T., Lenco, J., Ruzicka, A. & Zimcik, P. Role of Steric Hindrance in the Newman-Kwart Rearrangement and in the Synthesis and Photophysical Properties of Arylsulfanyl Tetrapyrazinoporphyrazines. *J. Org. Chem.* **79**, 2082–2093 (2014).
- (20) Klose, J., Reese, C. B. & Song, Q. Preparation of 2-(2-cyanoethyl)sulfanyl-1*H*-isoindole-1,3-(2*H*)-dione and related sulfur transfer agents. *Tetrahedron* **53**, 14411–14416 (1997).

- (21) Gillis, H. M.; Greene, L.; Thompson A. Preparation of sulfenyl pyrrols. *Synlett*, 112–116 (2009).
- (22) Bozkurt, Y. S. & Kutuk, H. The synthesis of sulfinylphthalimides and their reactions with some nucleophiles in dioxane. *Phosphorus, Sulfur and Silicon and the Related Elements* **186**, 2250–2257 (2011).
- (23) Büchel, K. H. & Conte, A. Über die Reaktion von *N*-Brom-Imiden mit Disulfiden zu Sulfenimiden. *Chem. Ber.* **100**, 1248–1251 (1967).
- (24) Gaussian 09, Revision B.01, M. J. Frisch, G. W. Trucks, H. B. Schlegel, G. E. Scuseria, M. A. Robb, J. R. Cheeseman, G. Scalmani, V. Barone, B. Mennucci, G. A. Petersson, H. Nakatsuji, M. Caricato, X. Li, H. P. Hratchian, A. F. Izmaylov, J. Bloino, G. Zheng, J. L. Sonnenberg, M. Hada, M. Ehara, K. Toyota, R. Fukuda, J. Hasegawa, M. Ishida, T. Nakajima, Y. Honda, O. Kitao, H. Nakai, T. Vreven, J. A. Montgomery, Jr., J. E. Peralta, F. Ogliaro, M. Bearpark, J. J. Heyd, E. Brothers, K. N. Kudin, V. N. Staroverov, R. Kobayashi, J. Normand, K. Raghavachari, A. Rendell, J. C. Burant, S. S. Iyengar, J. Tomasi, M. Cossi, N. Rega, J. M. Millam, M. Klene, J. E. Knox, J. B. Cross, V. Bakken, C. Adamo, J. Jaramillo, R. Gomperts, R. E. Stratmann, O. Yazyev, A. J. Austin, R. Cammi, C. Pomelli, J. W. Ochterski, R. L. Martin, K. Morokuma, V. G. Zakrzewski, G. A. Voth, P. Salvador, J. J. Dannenberg, S. Dapprich, A. D. Daniels, O. Farkas, J. B. Foresman, J. V. Ortiz, J. Cioslowski, and D. J. Fox, Gaussian, Inc., Wallingford CT, 2010.
- (25) (a) Reed, A. E.; Curtiss, L. A.; Weinhold, F. *Chem. Rev.* **88**, 899-926 (1988). (b) Glendening, E. D.; Reed, A. E.; Carpenter J. E.; Weinhold, F. NBO Version 3.1. (Theoretical Chemistry Institute, University of Wisconsin, Madison, WI, **2001**).
- (26) Barone, V.; Cossi, M. Quantum calculation of molecular energies and energy gradients in solution by a conductor solvent model. *J. Phys. Chem. A* **102**, 1995–2001 (1998).
- (27) Cossi, M., Rega, N., Scalmani, G. & Barone, V. Energies, structures, and electronic properties of molecules in solution with the C-PCM solvation model. *J. Comput. Chem.*, **24**, 669–681 (2003).

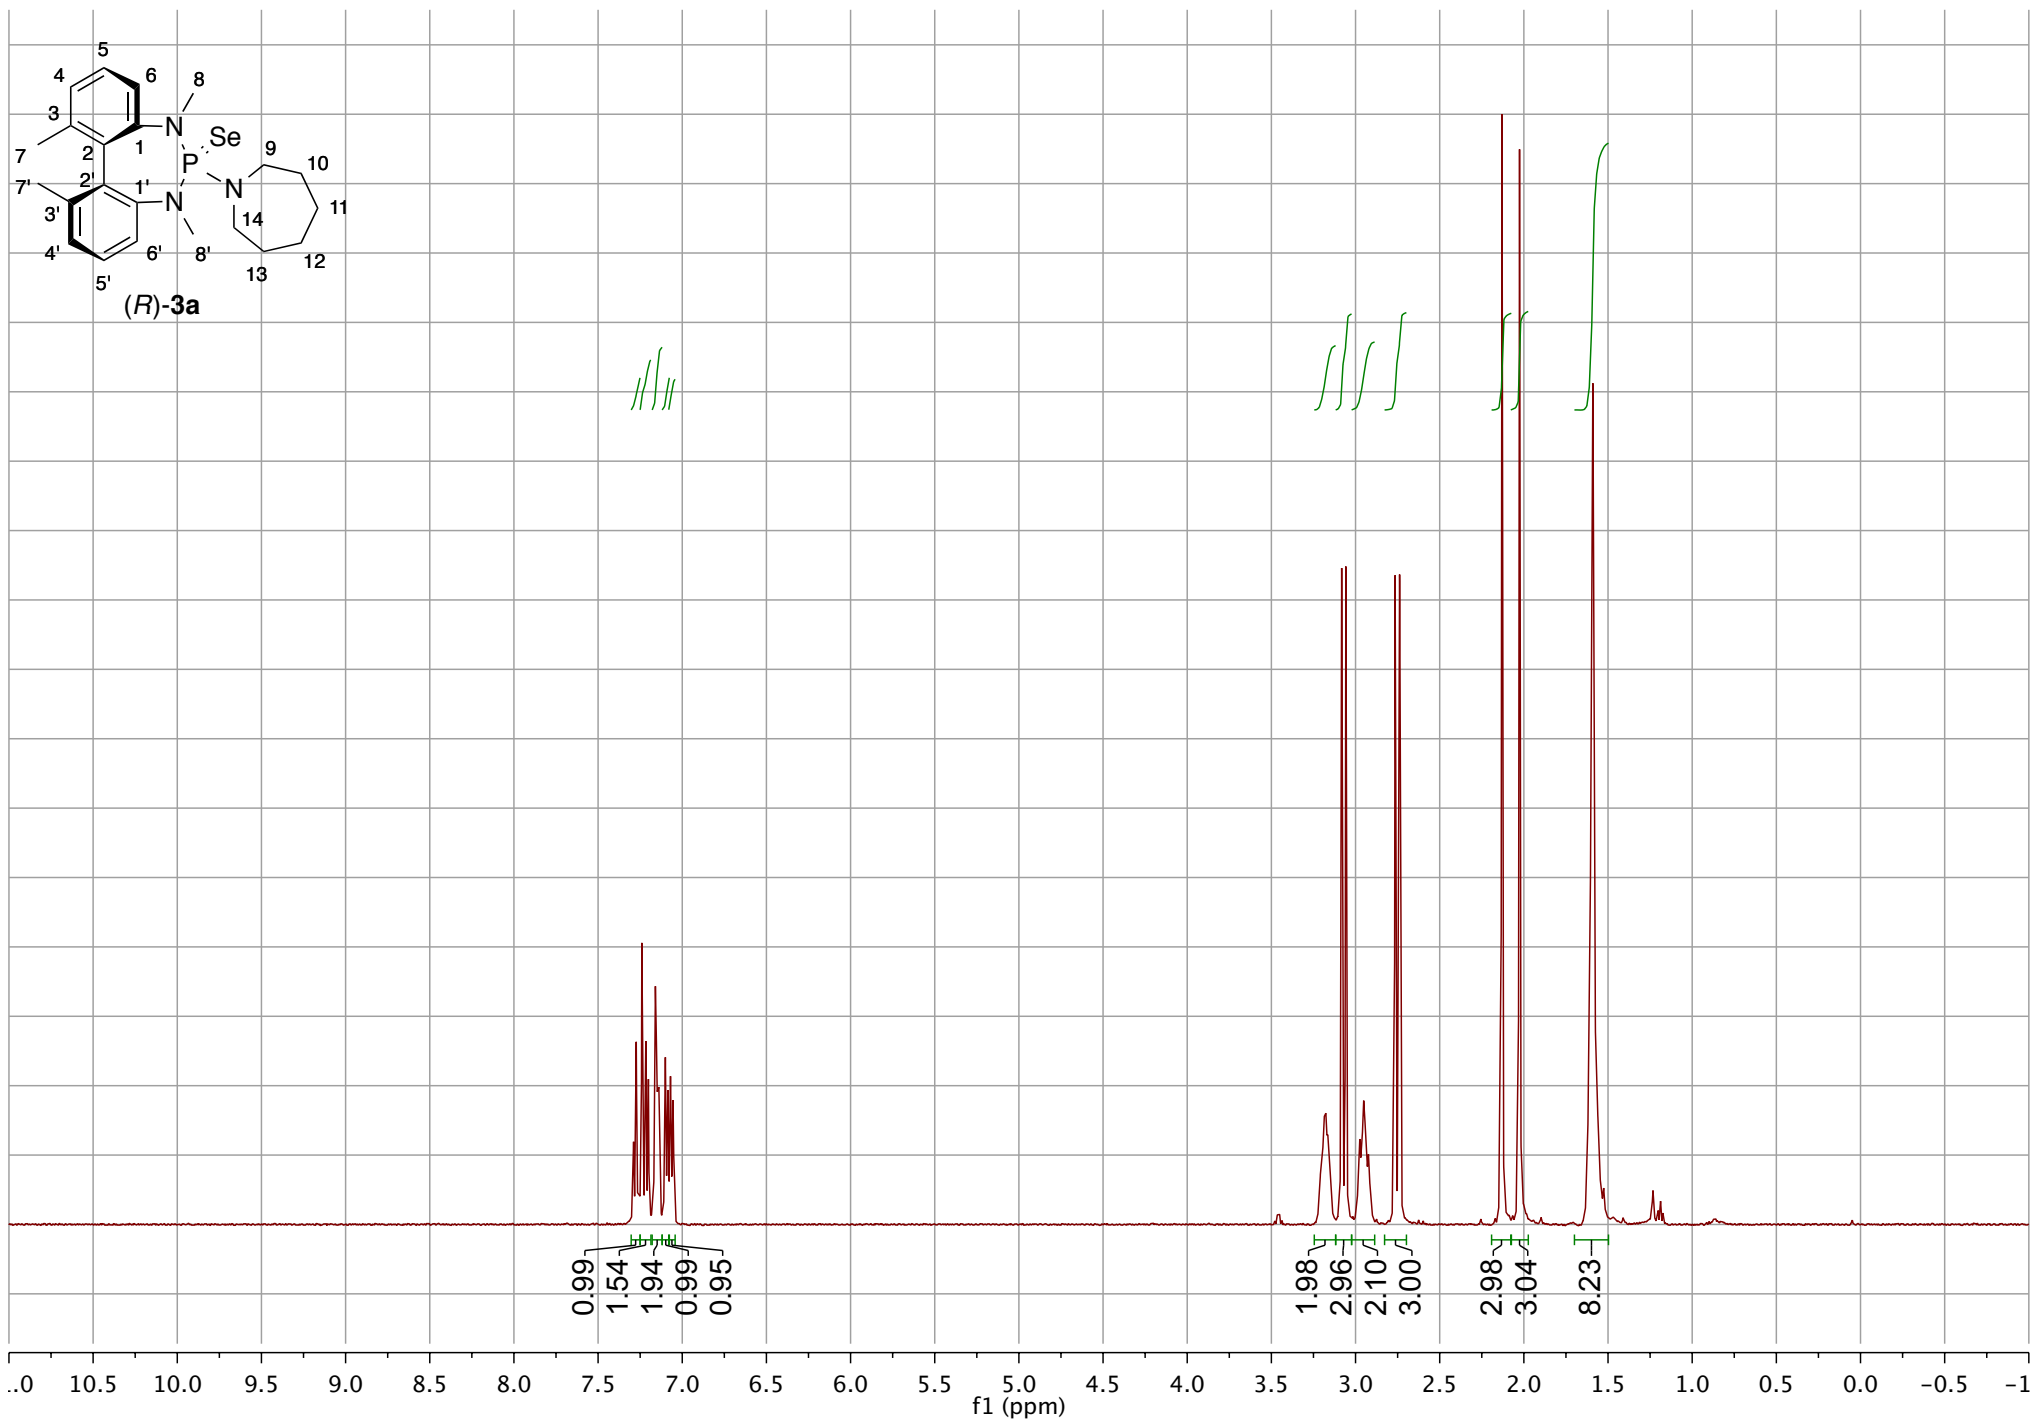

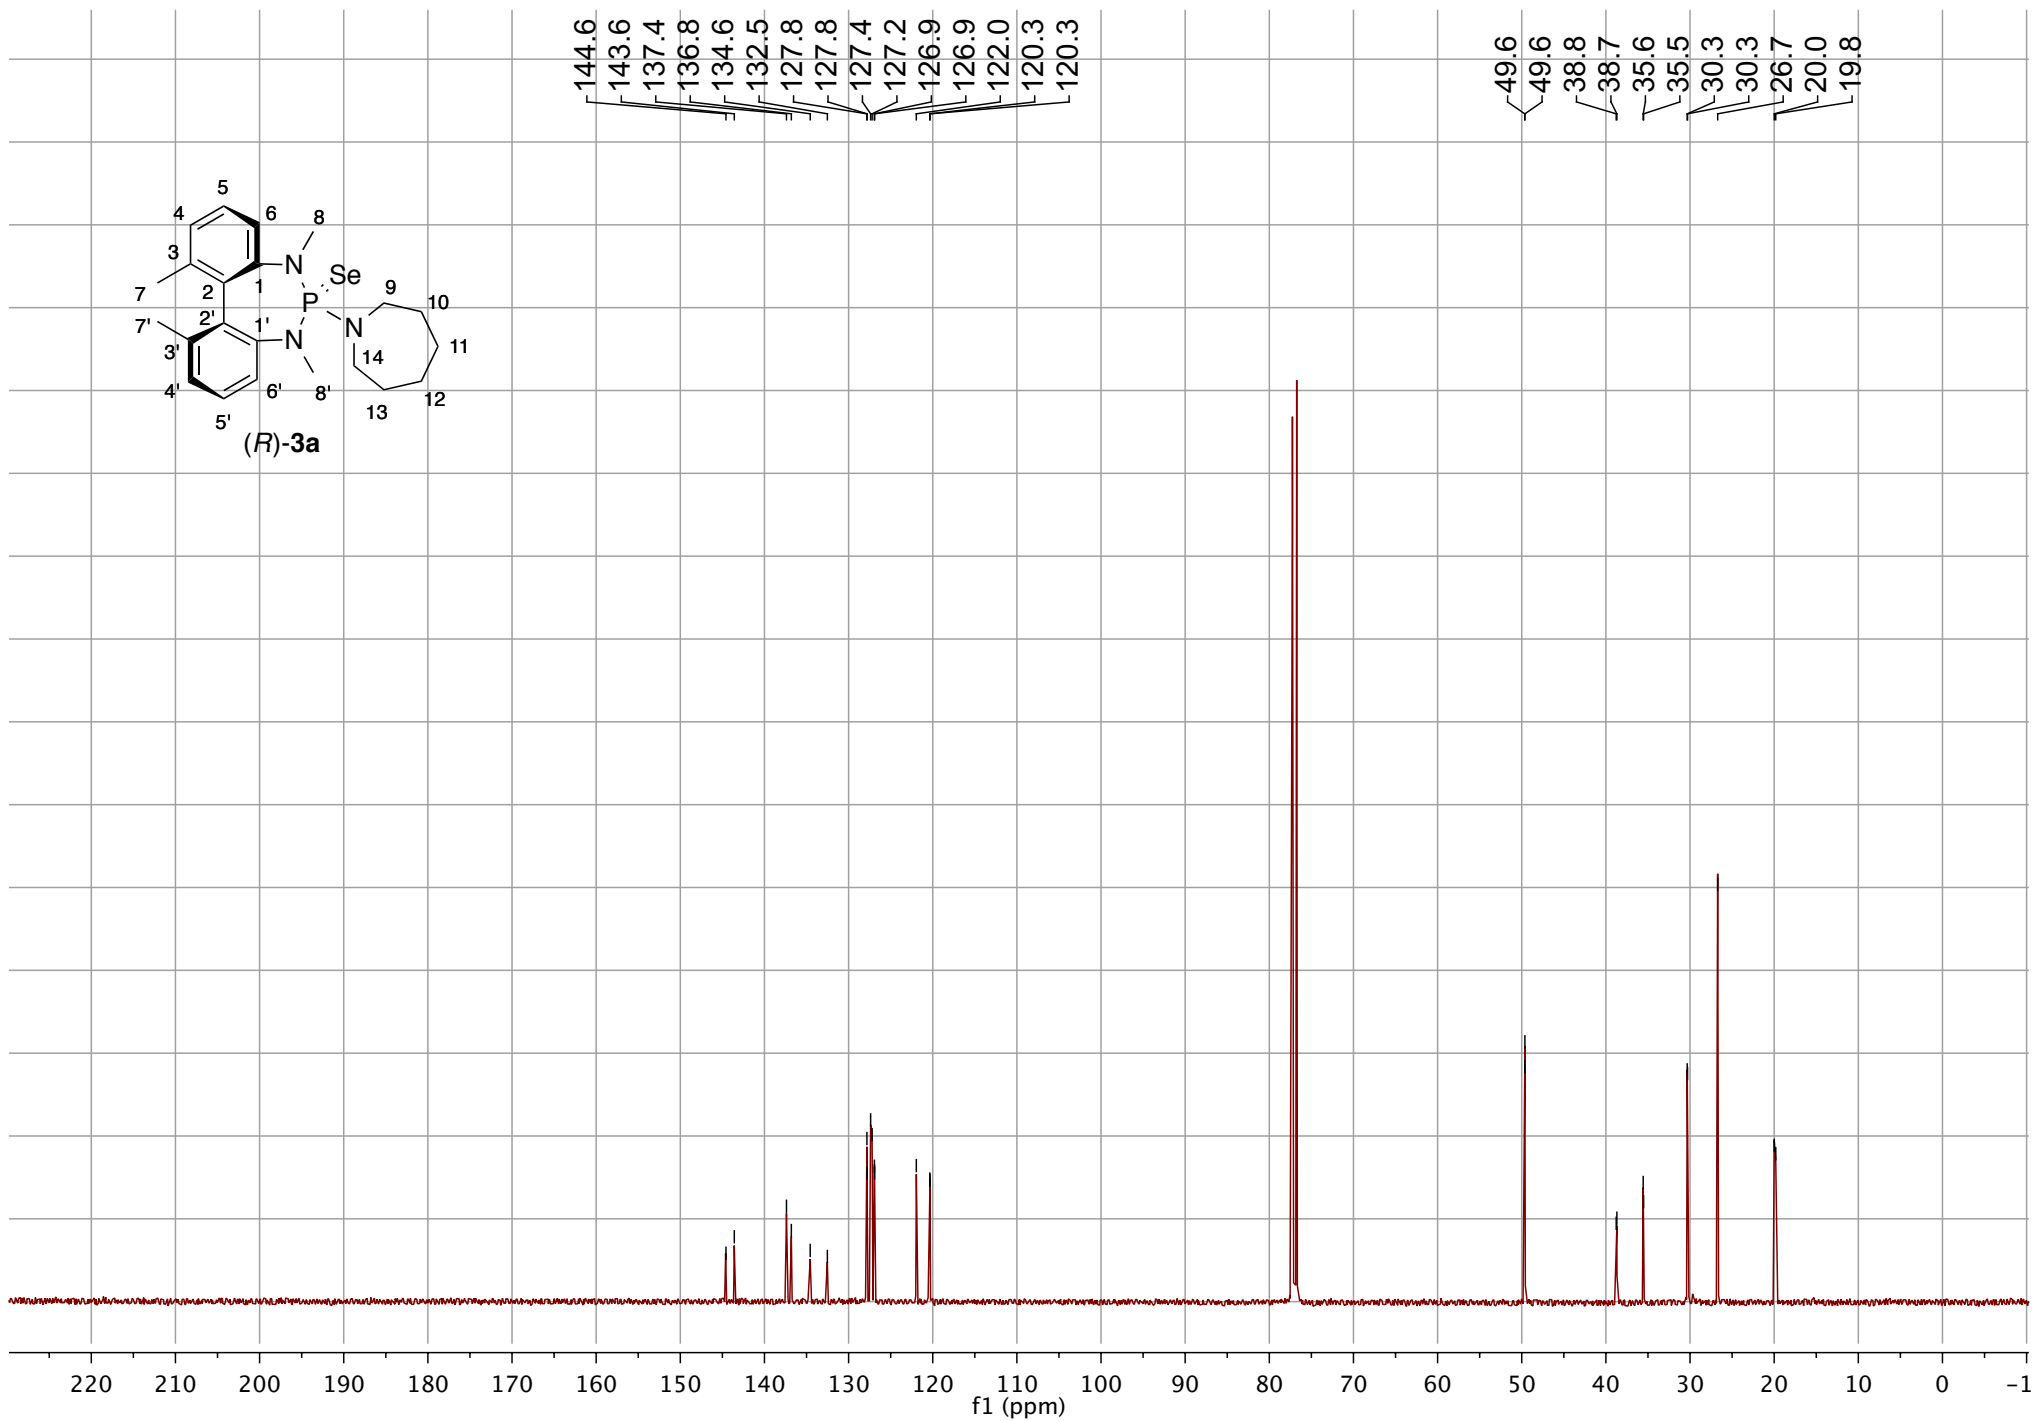

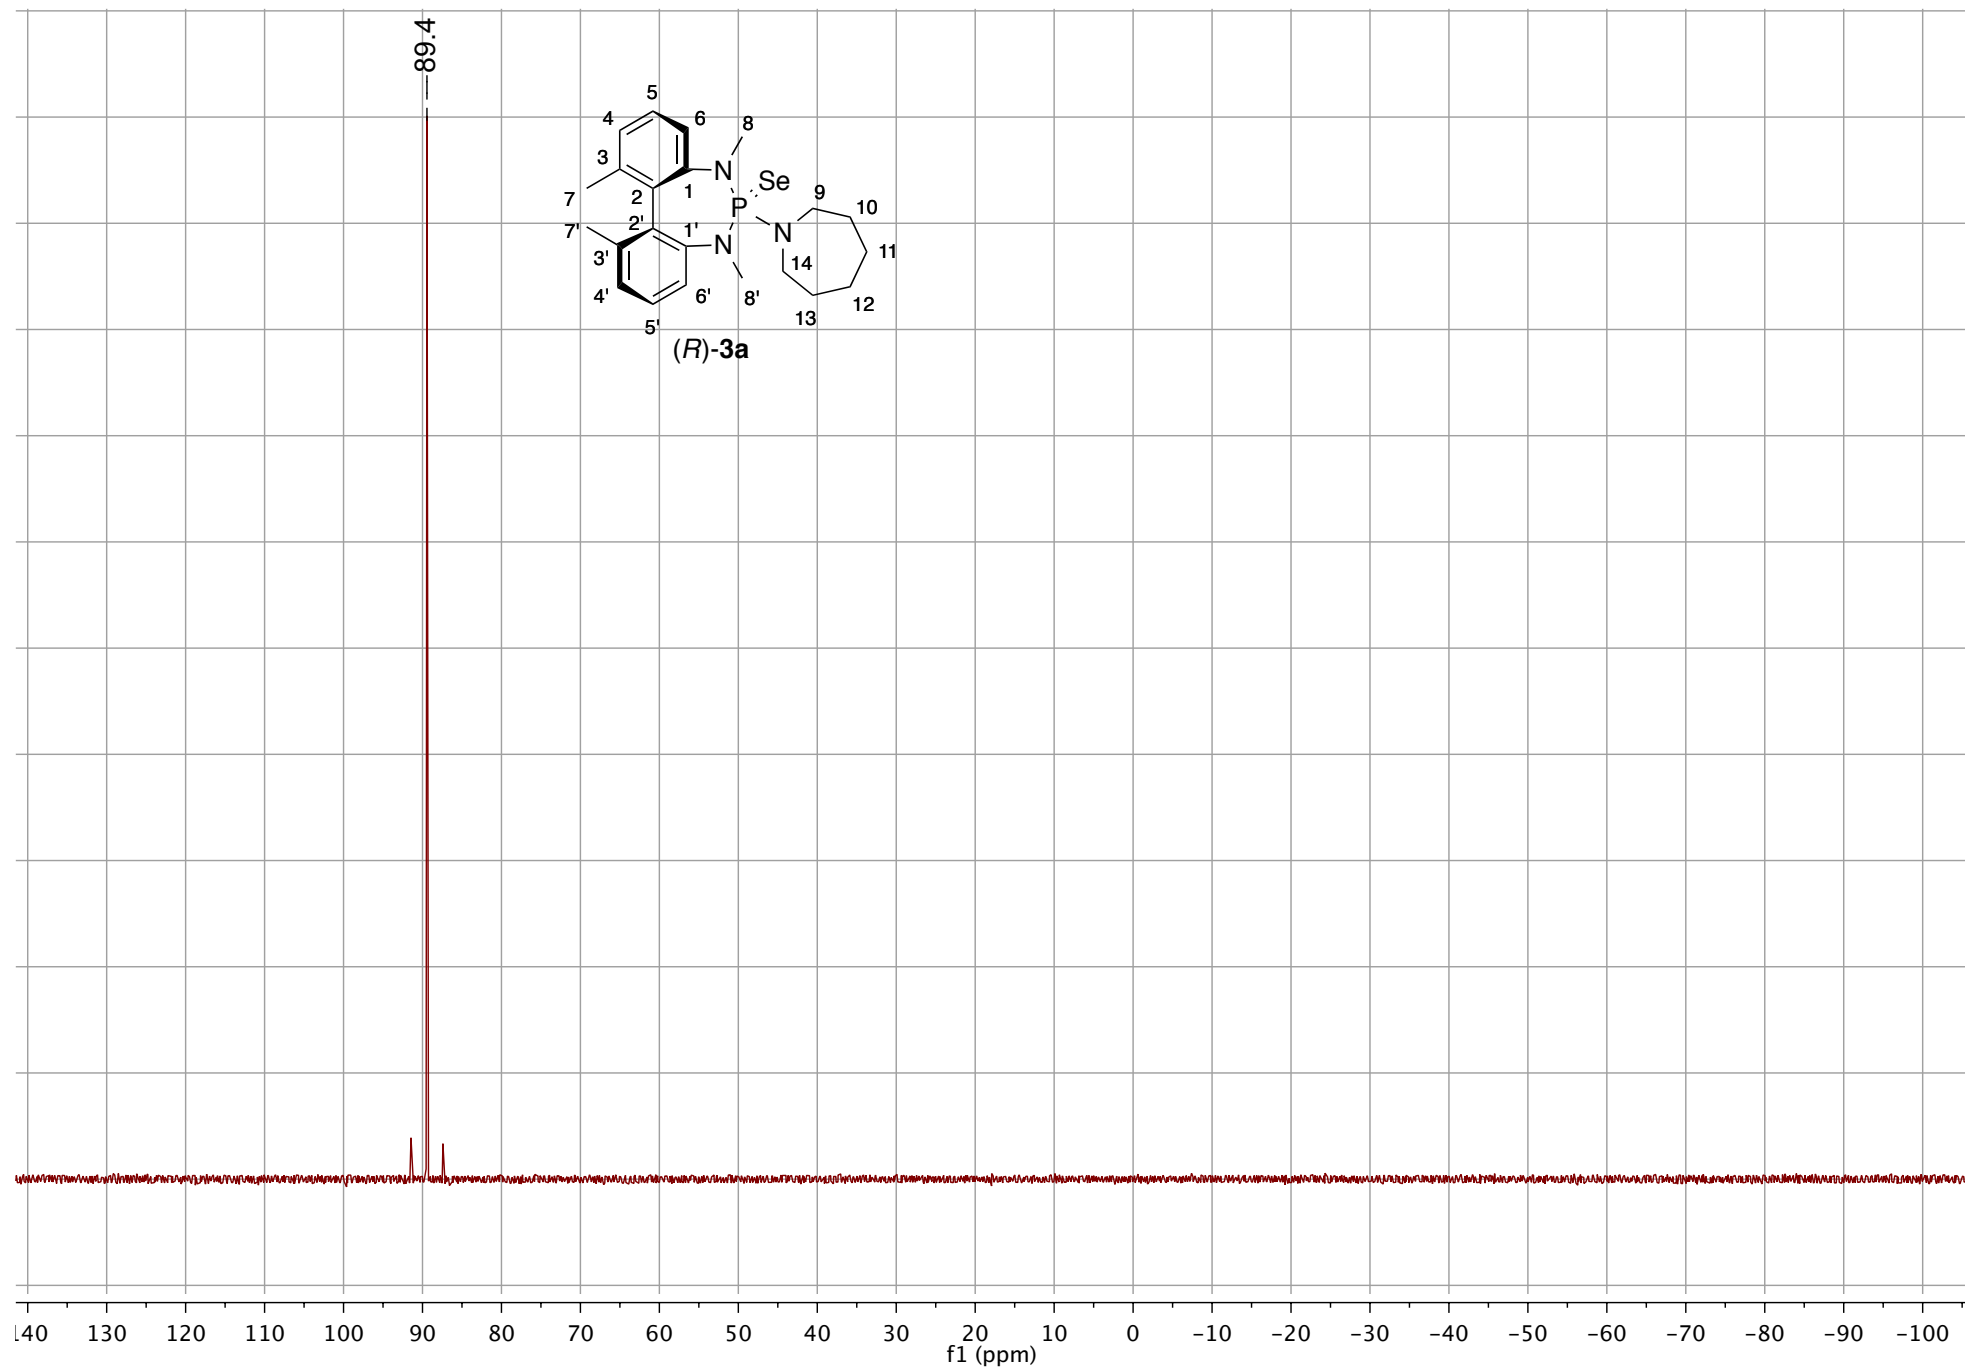

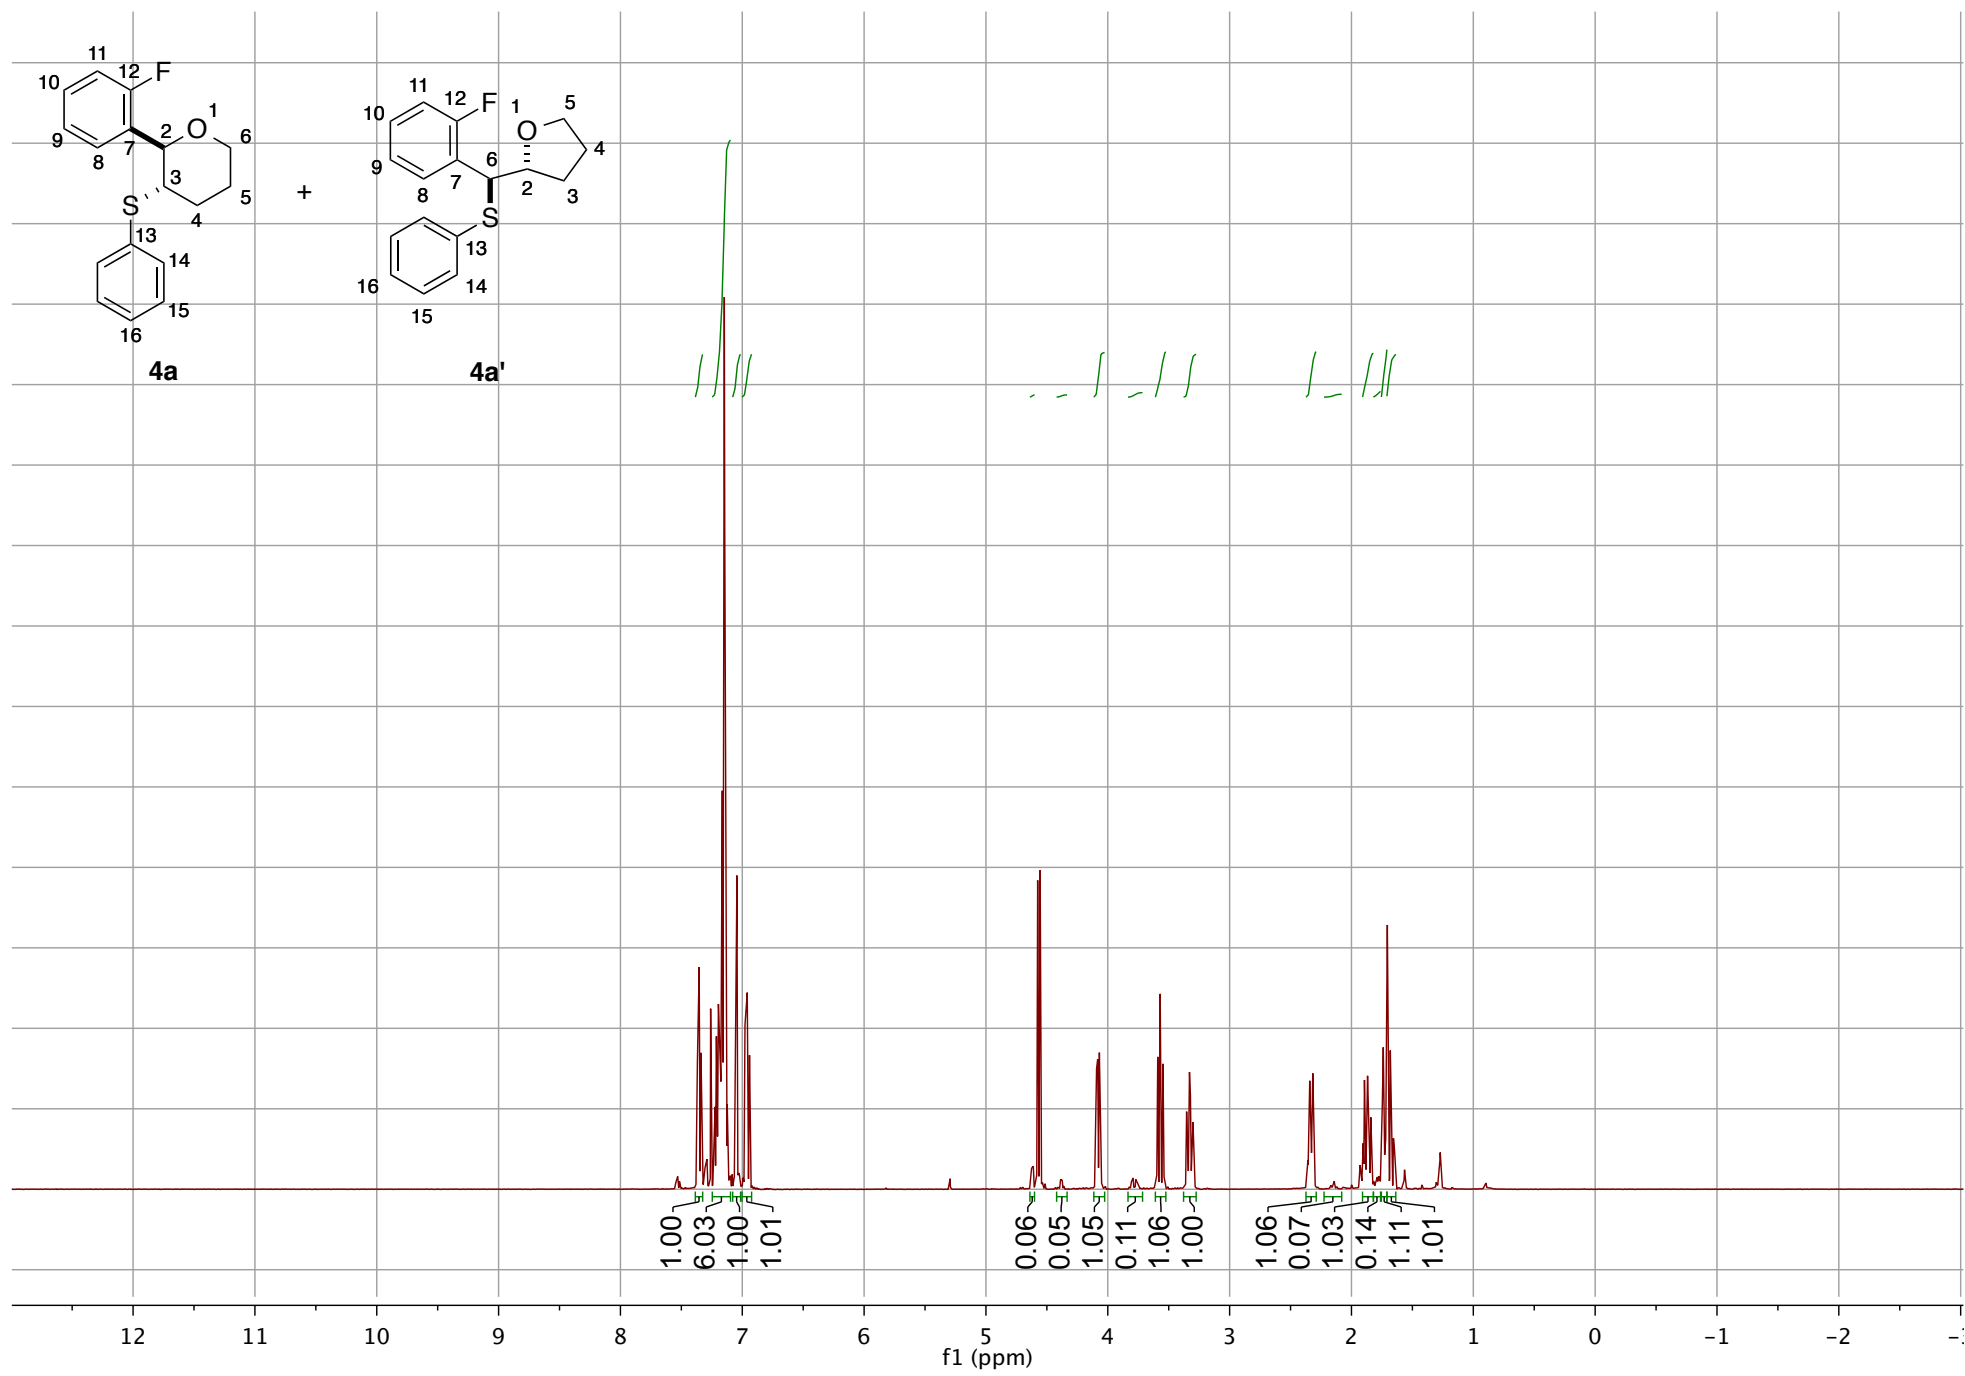

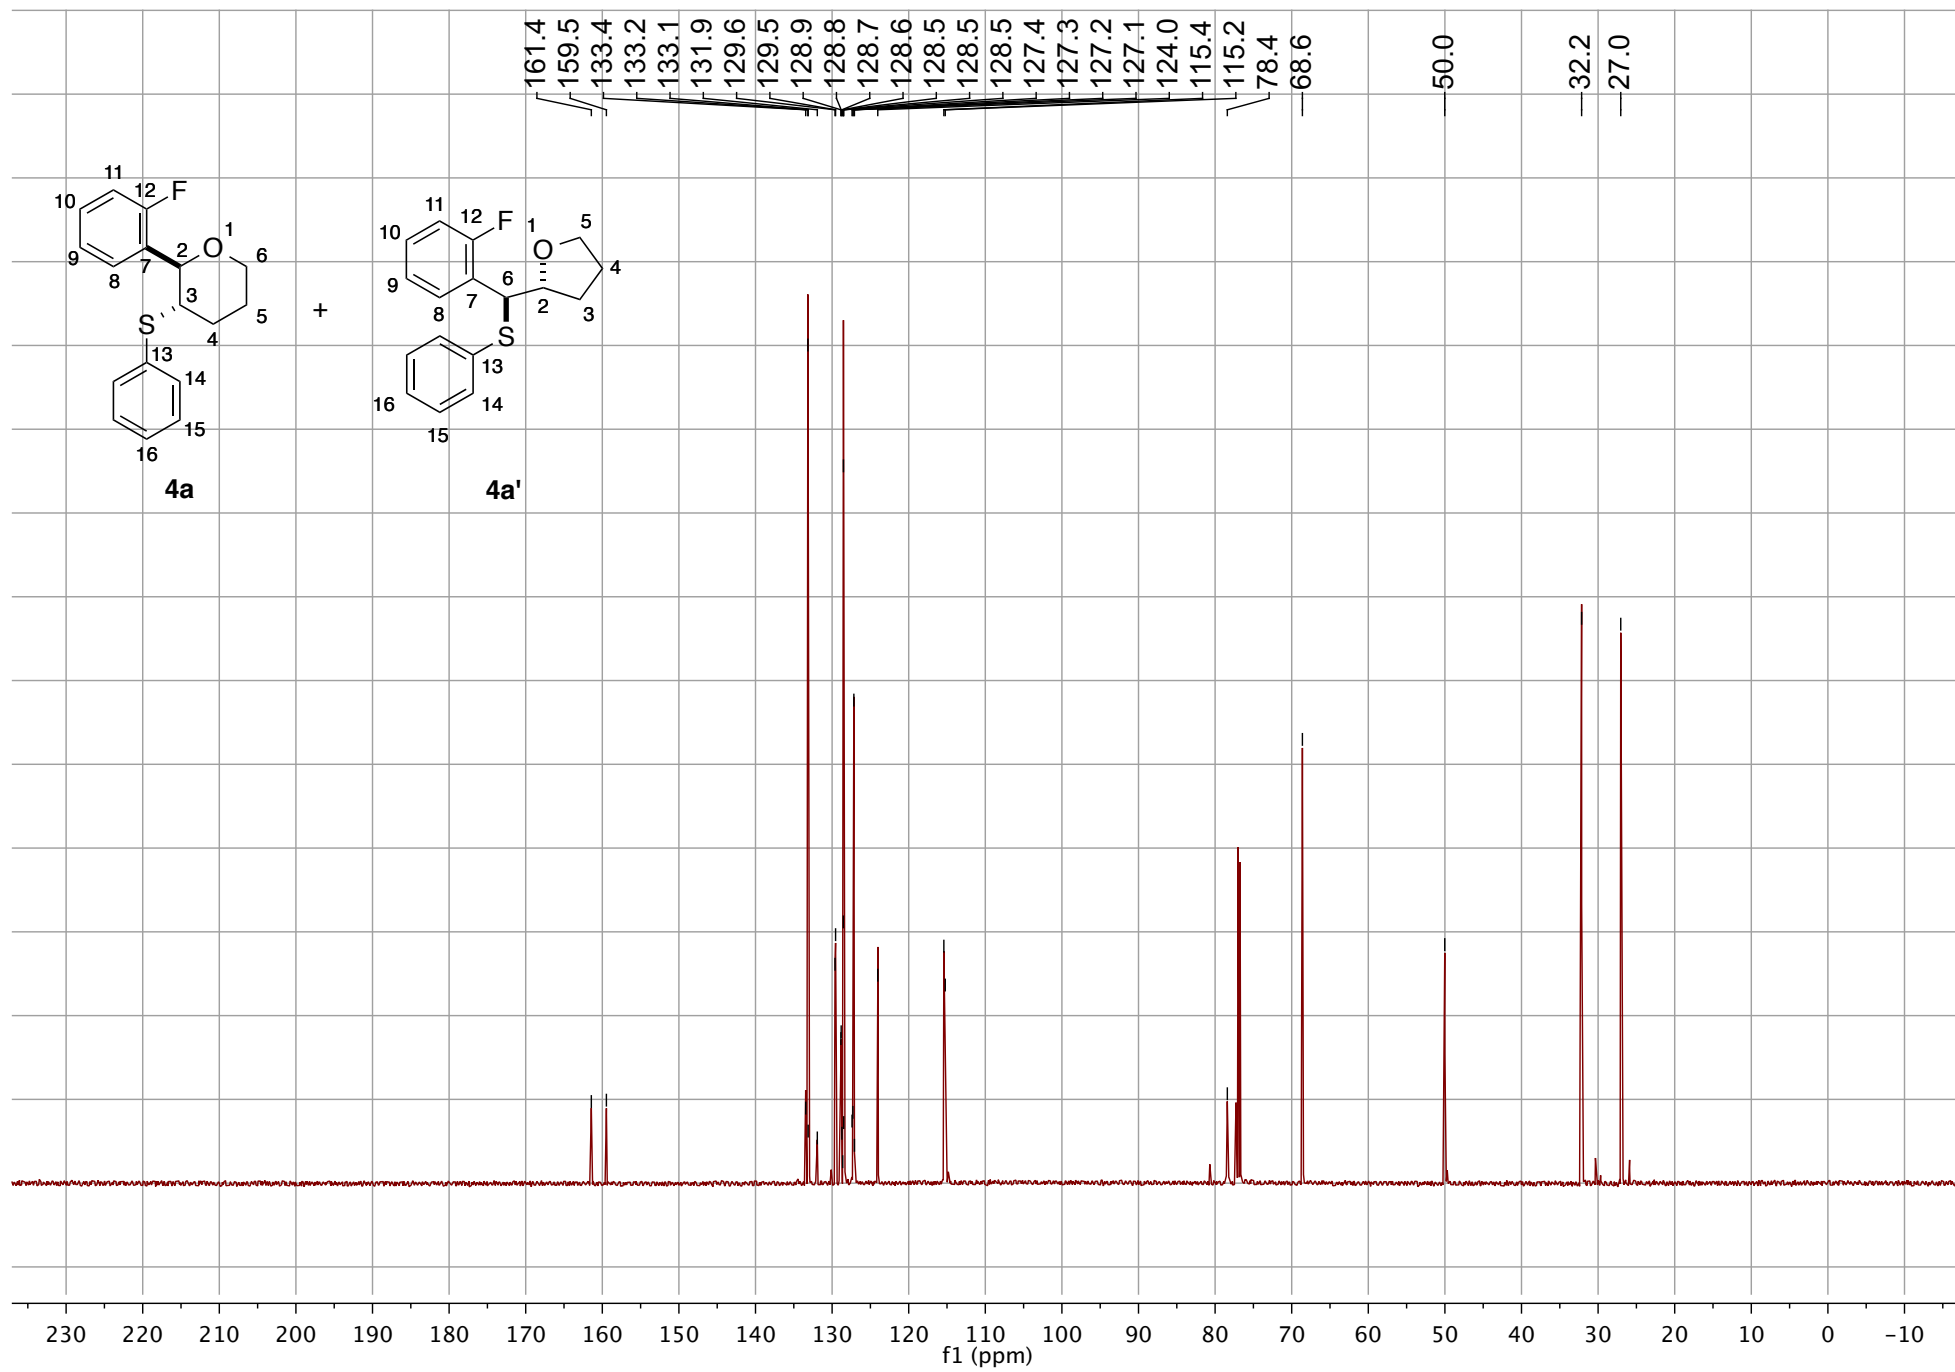



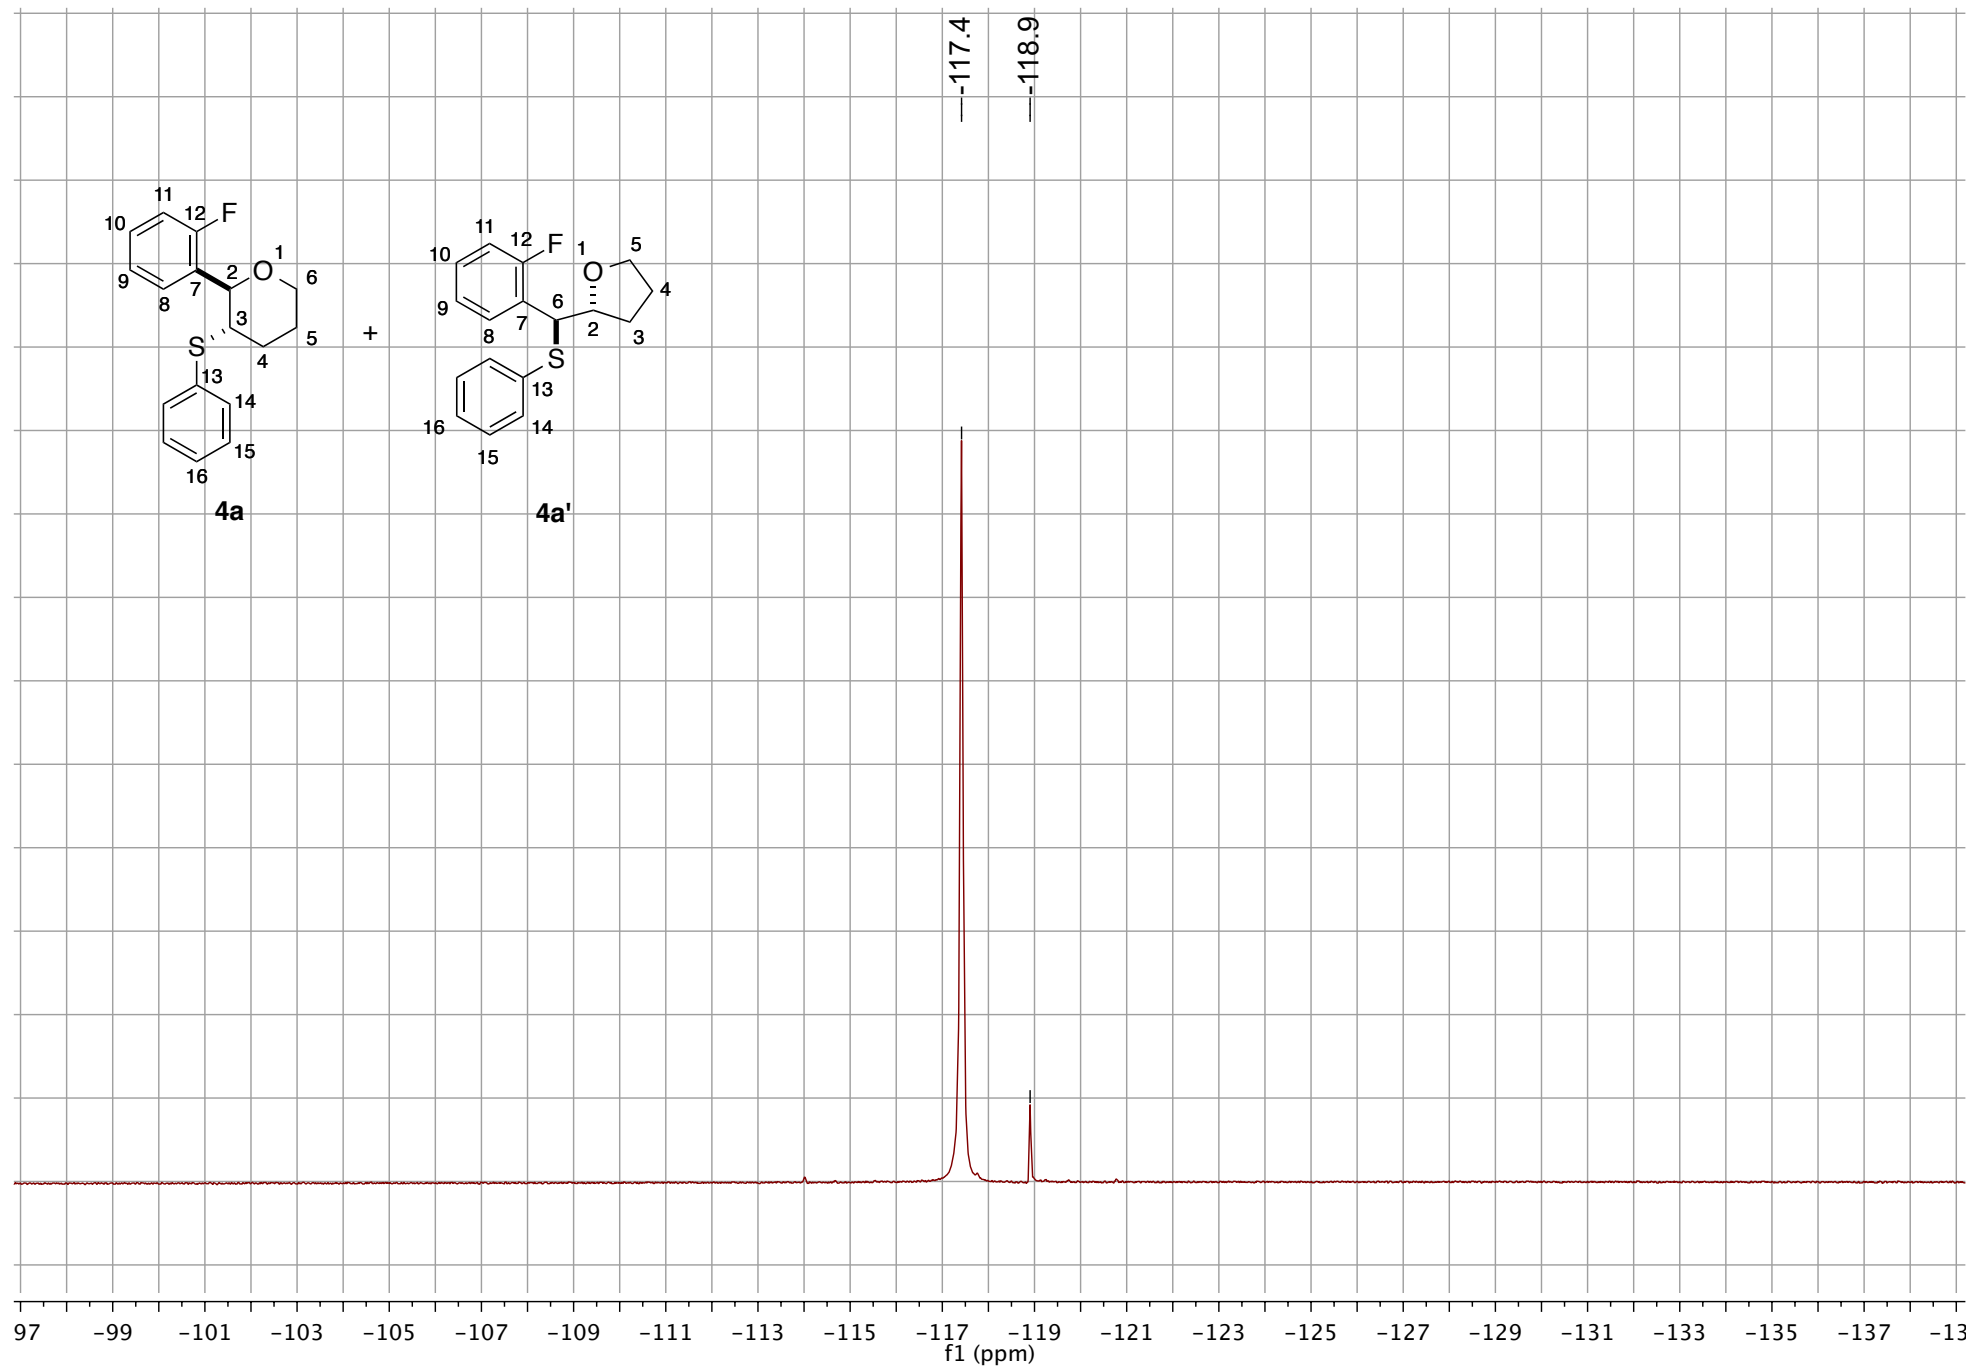

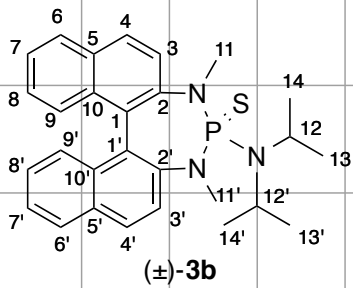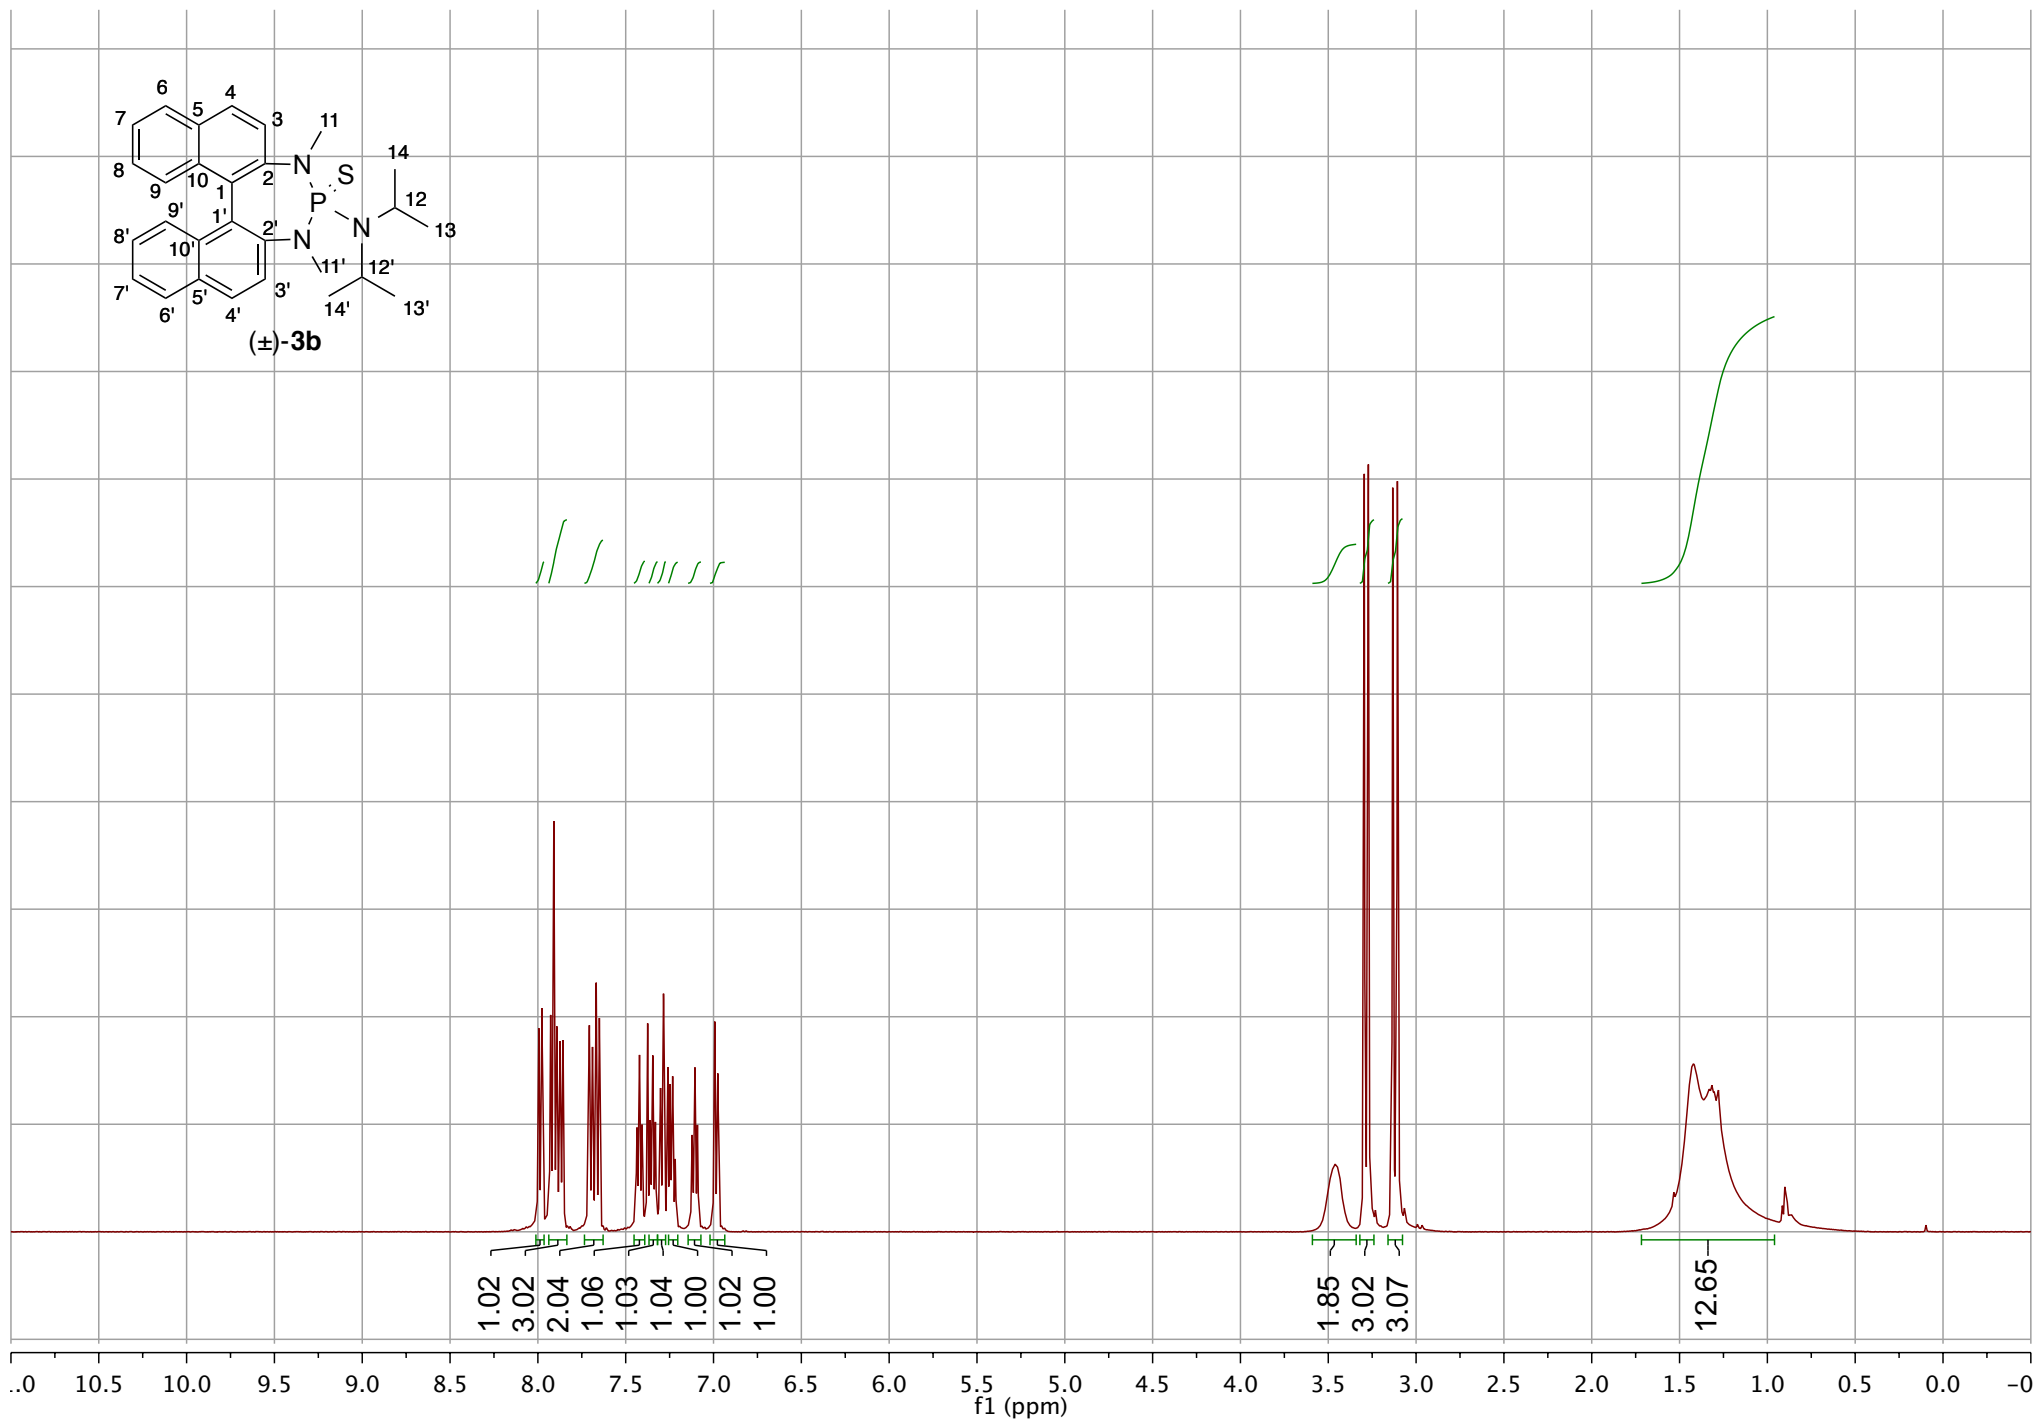

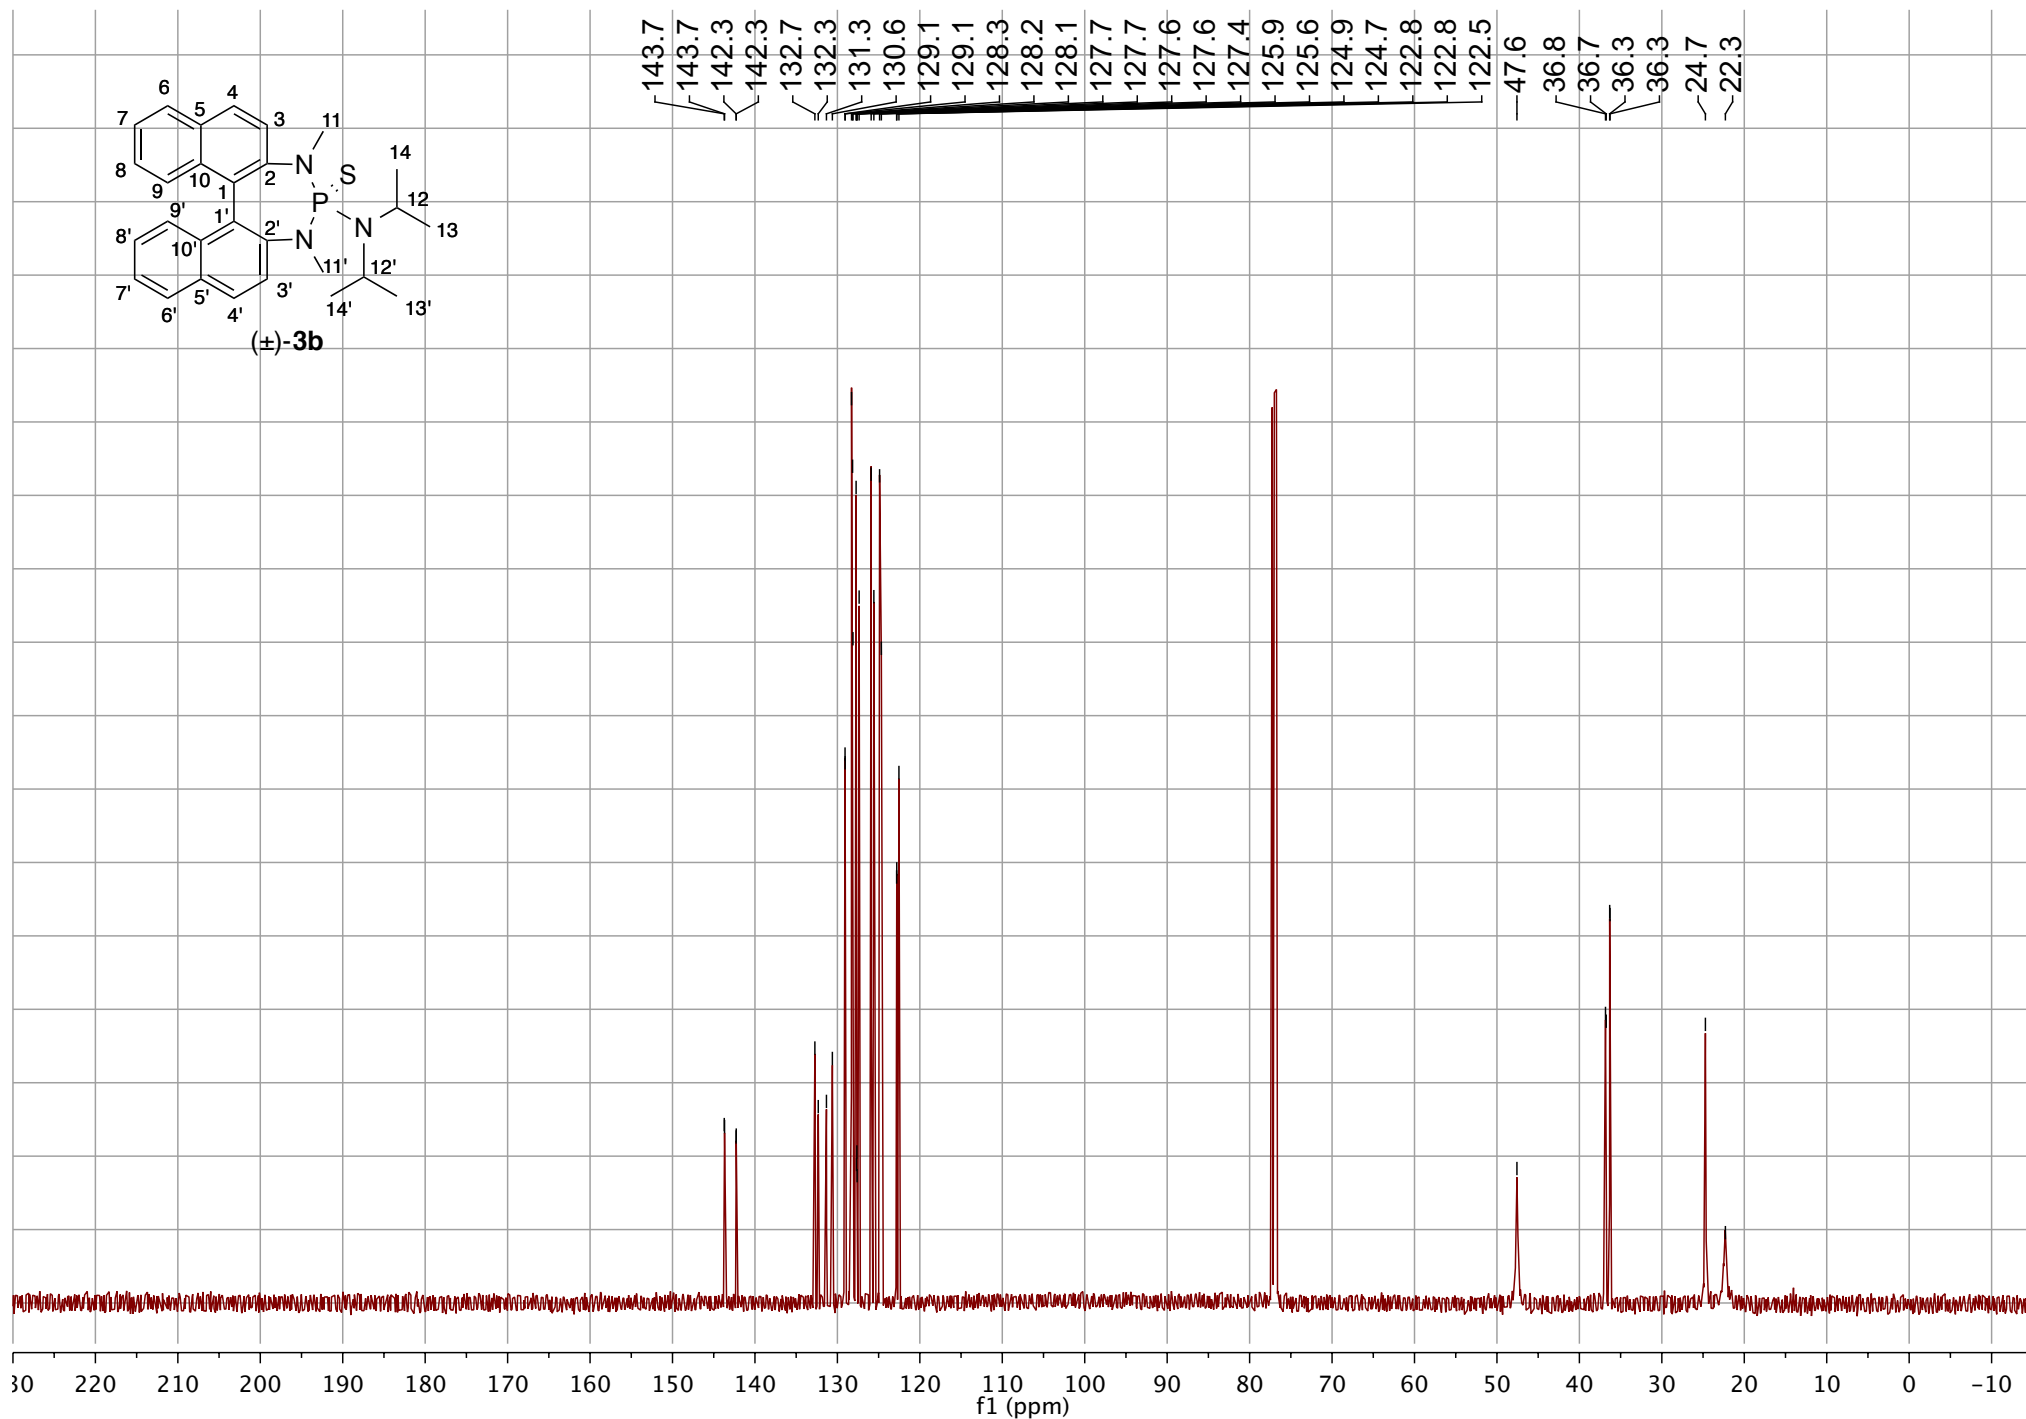

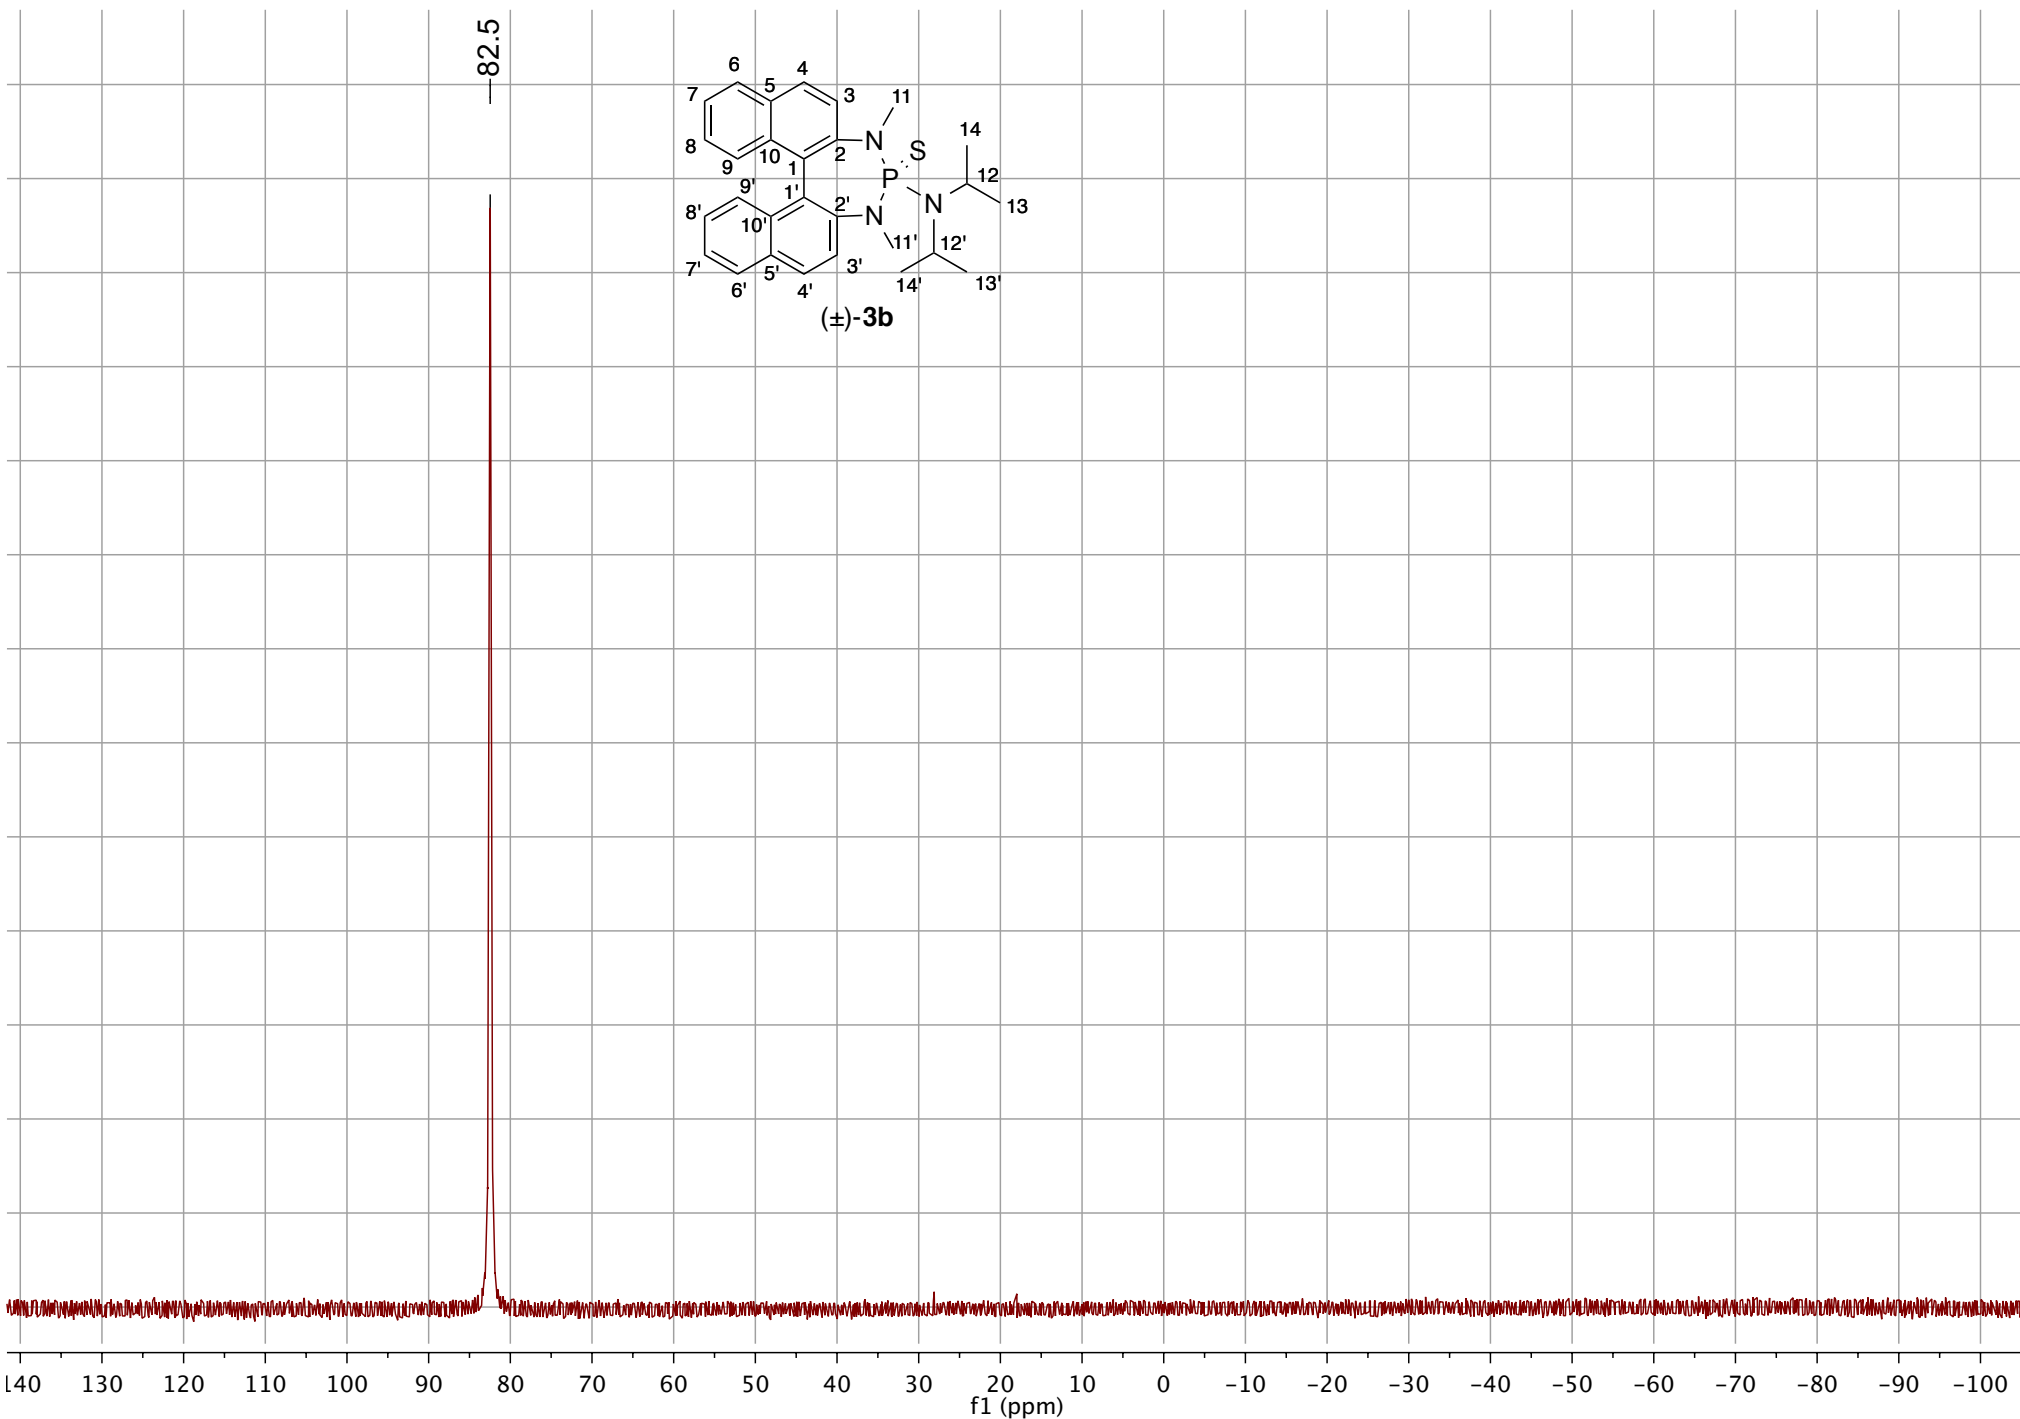

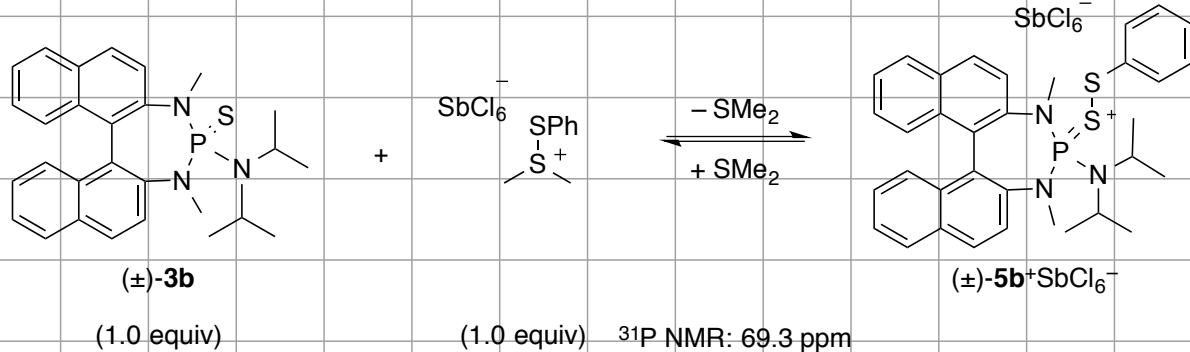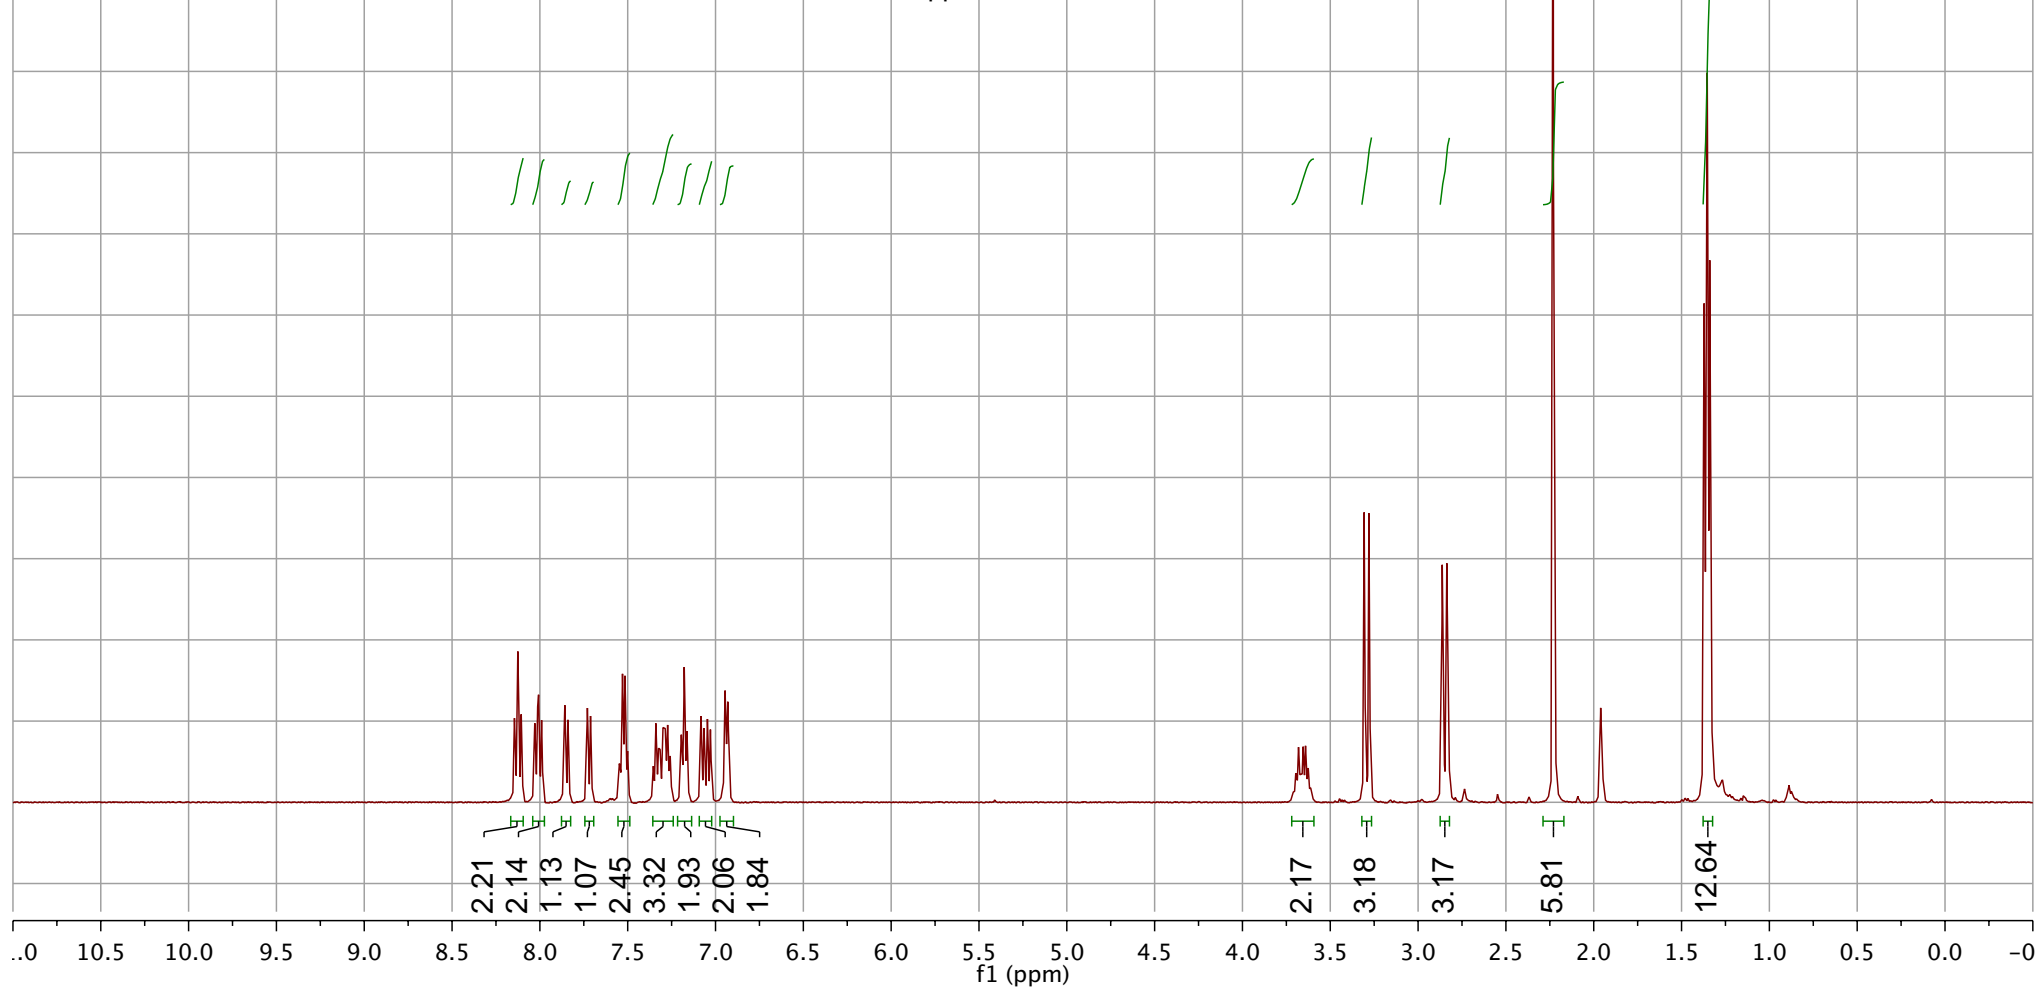

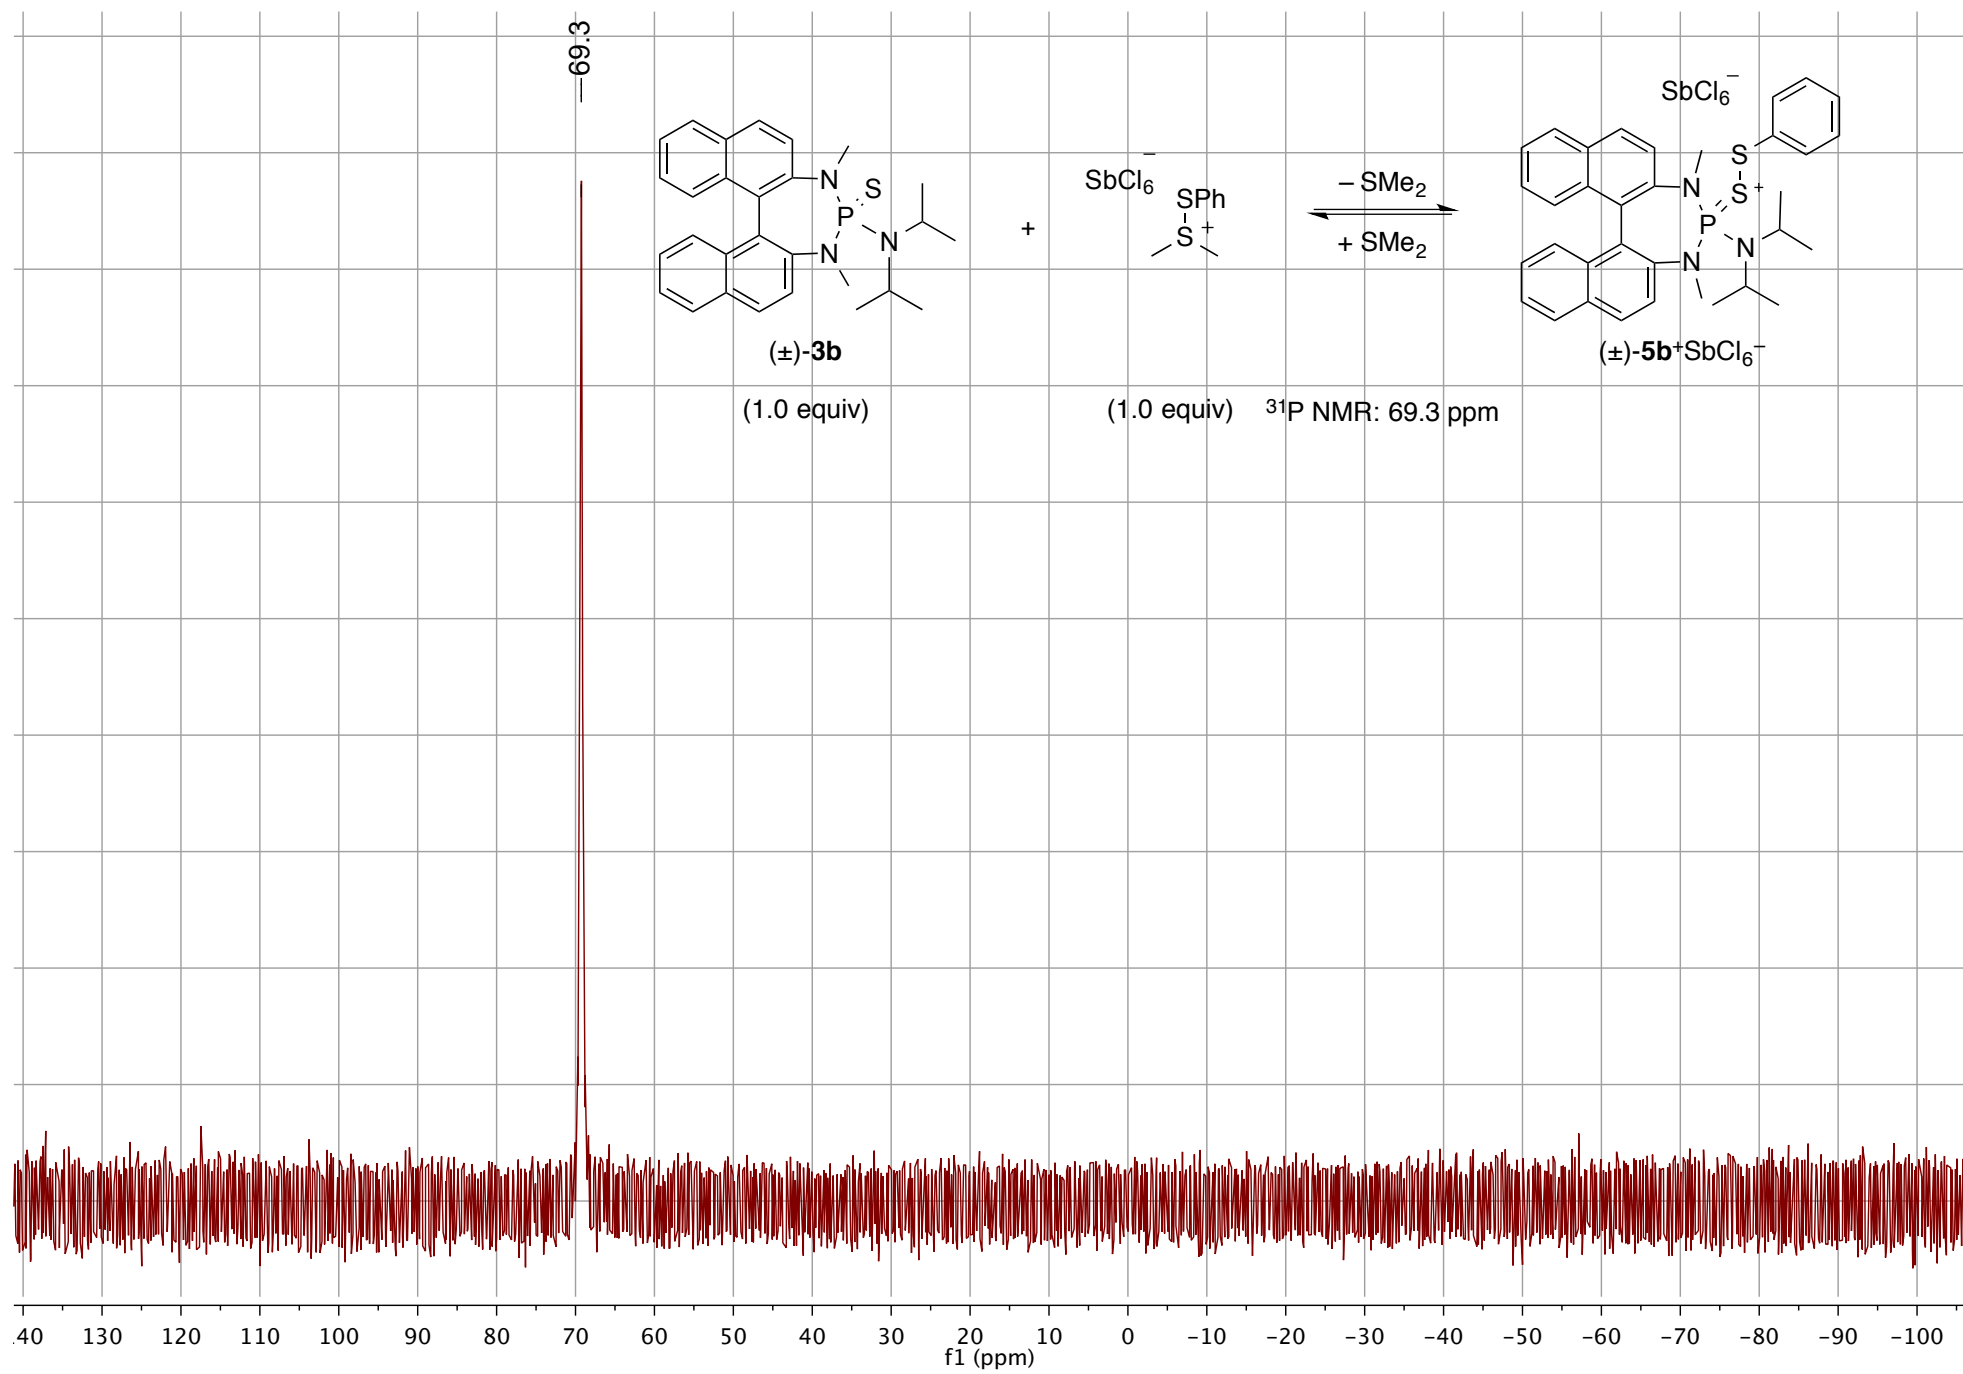

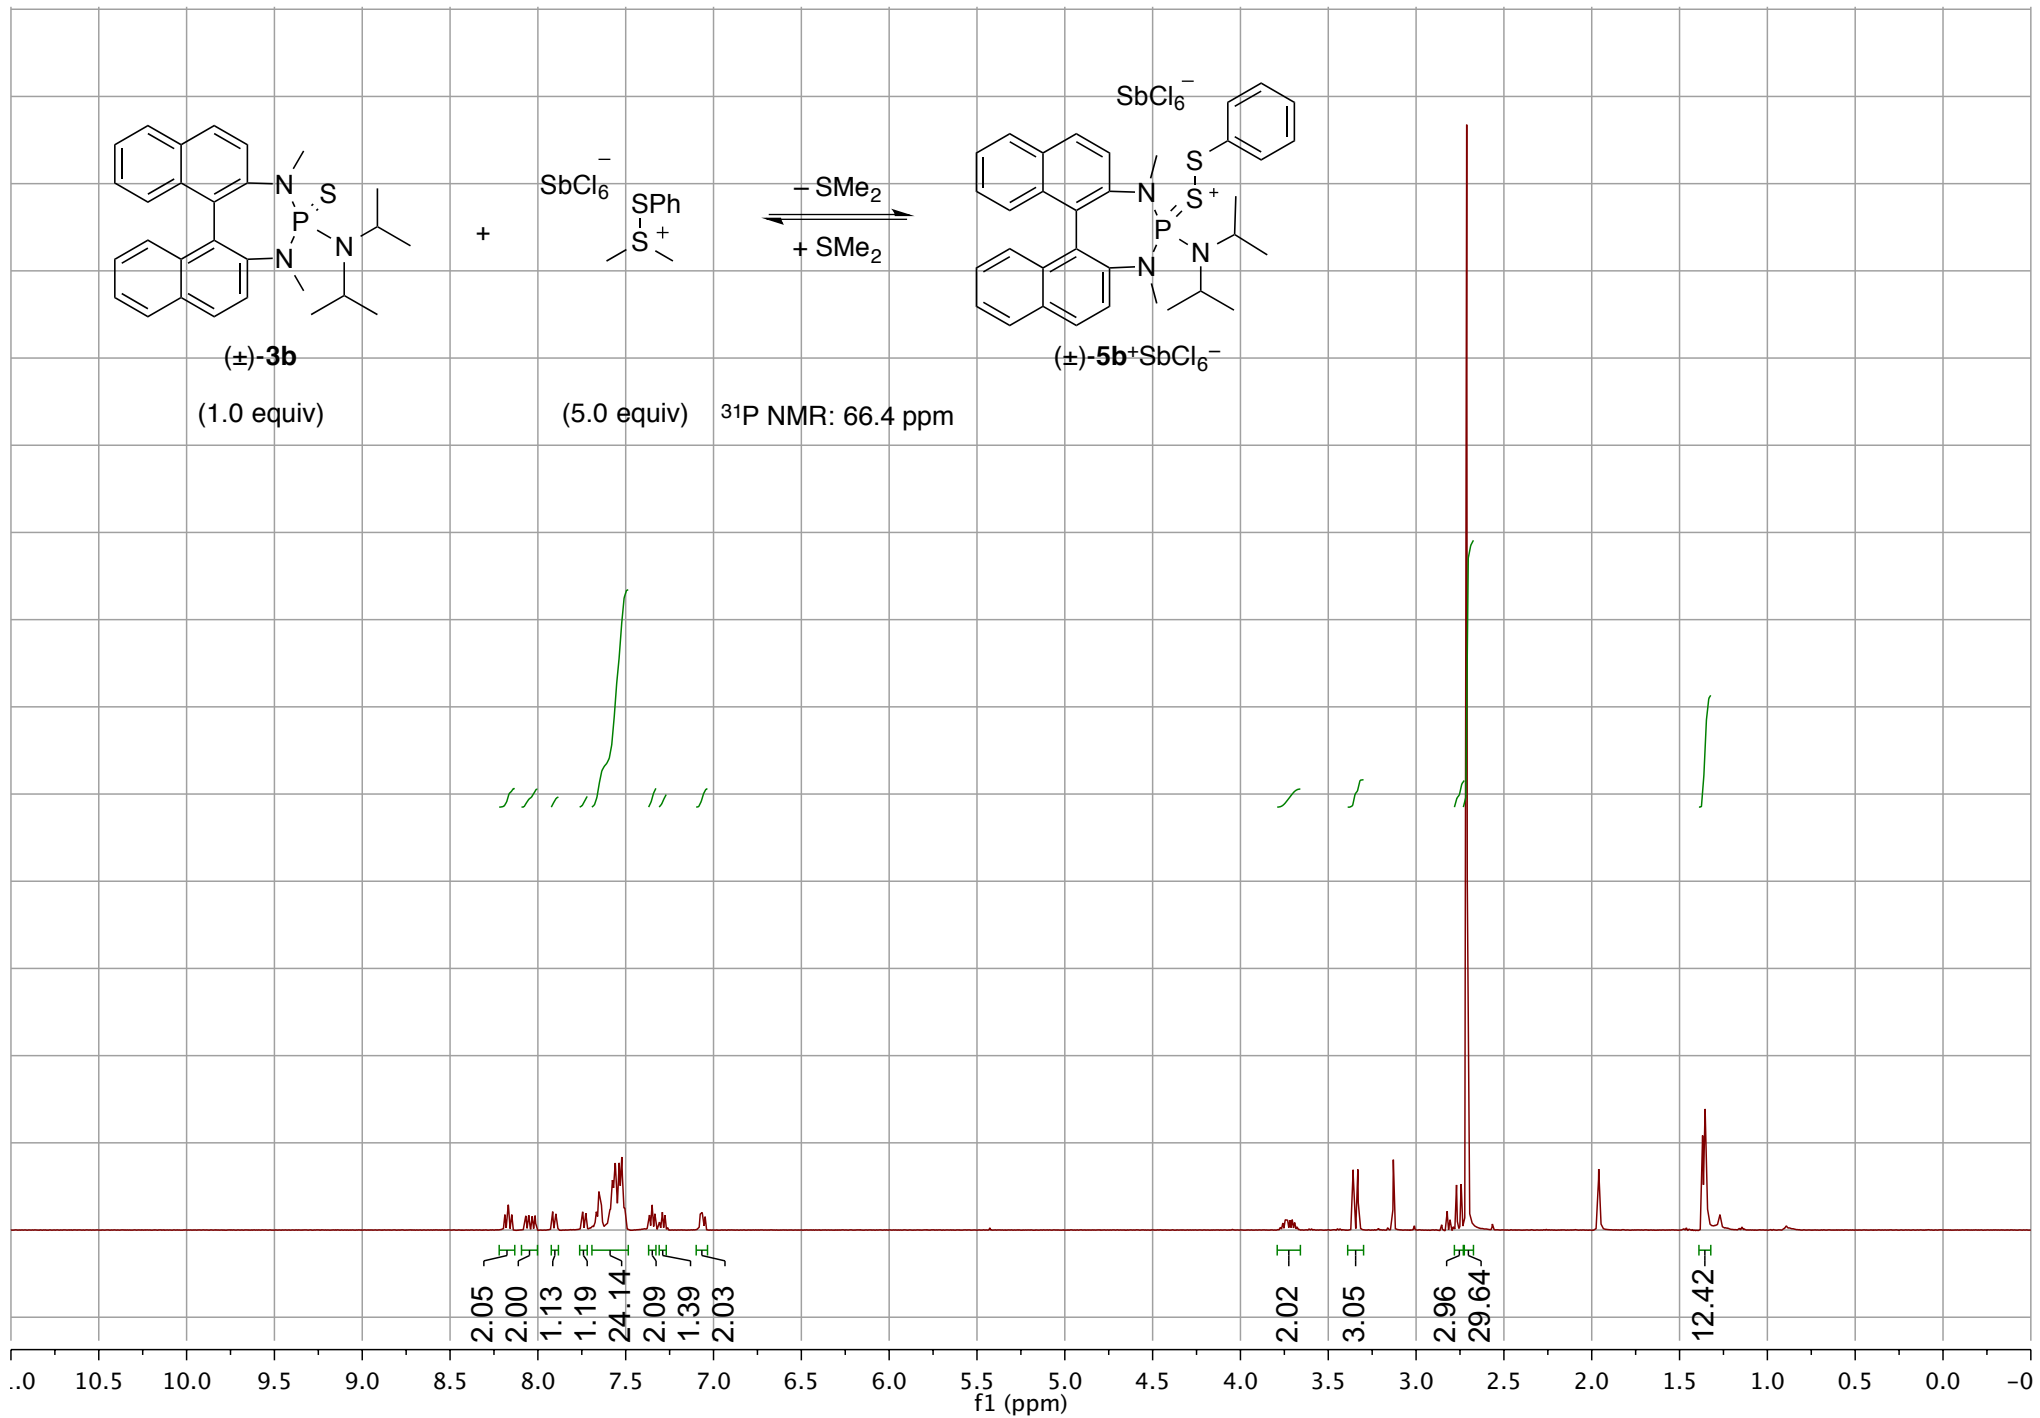

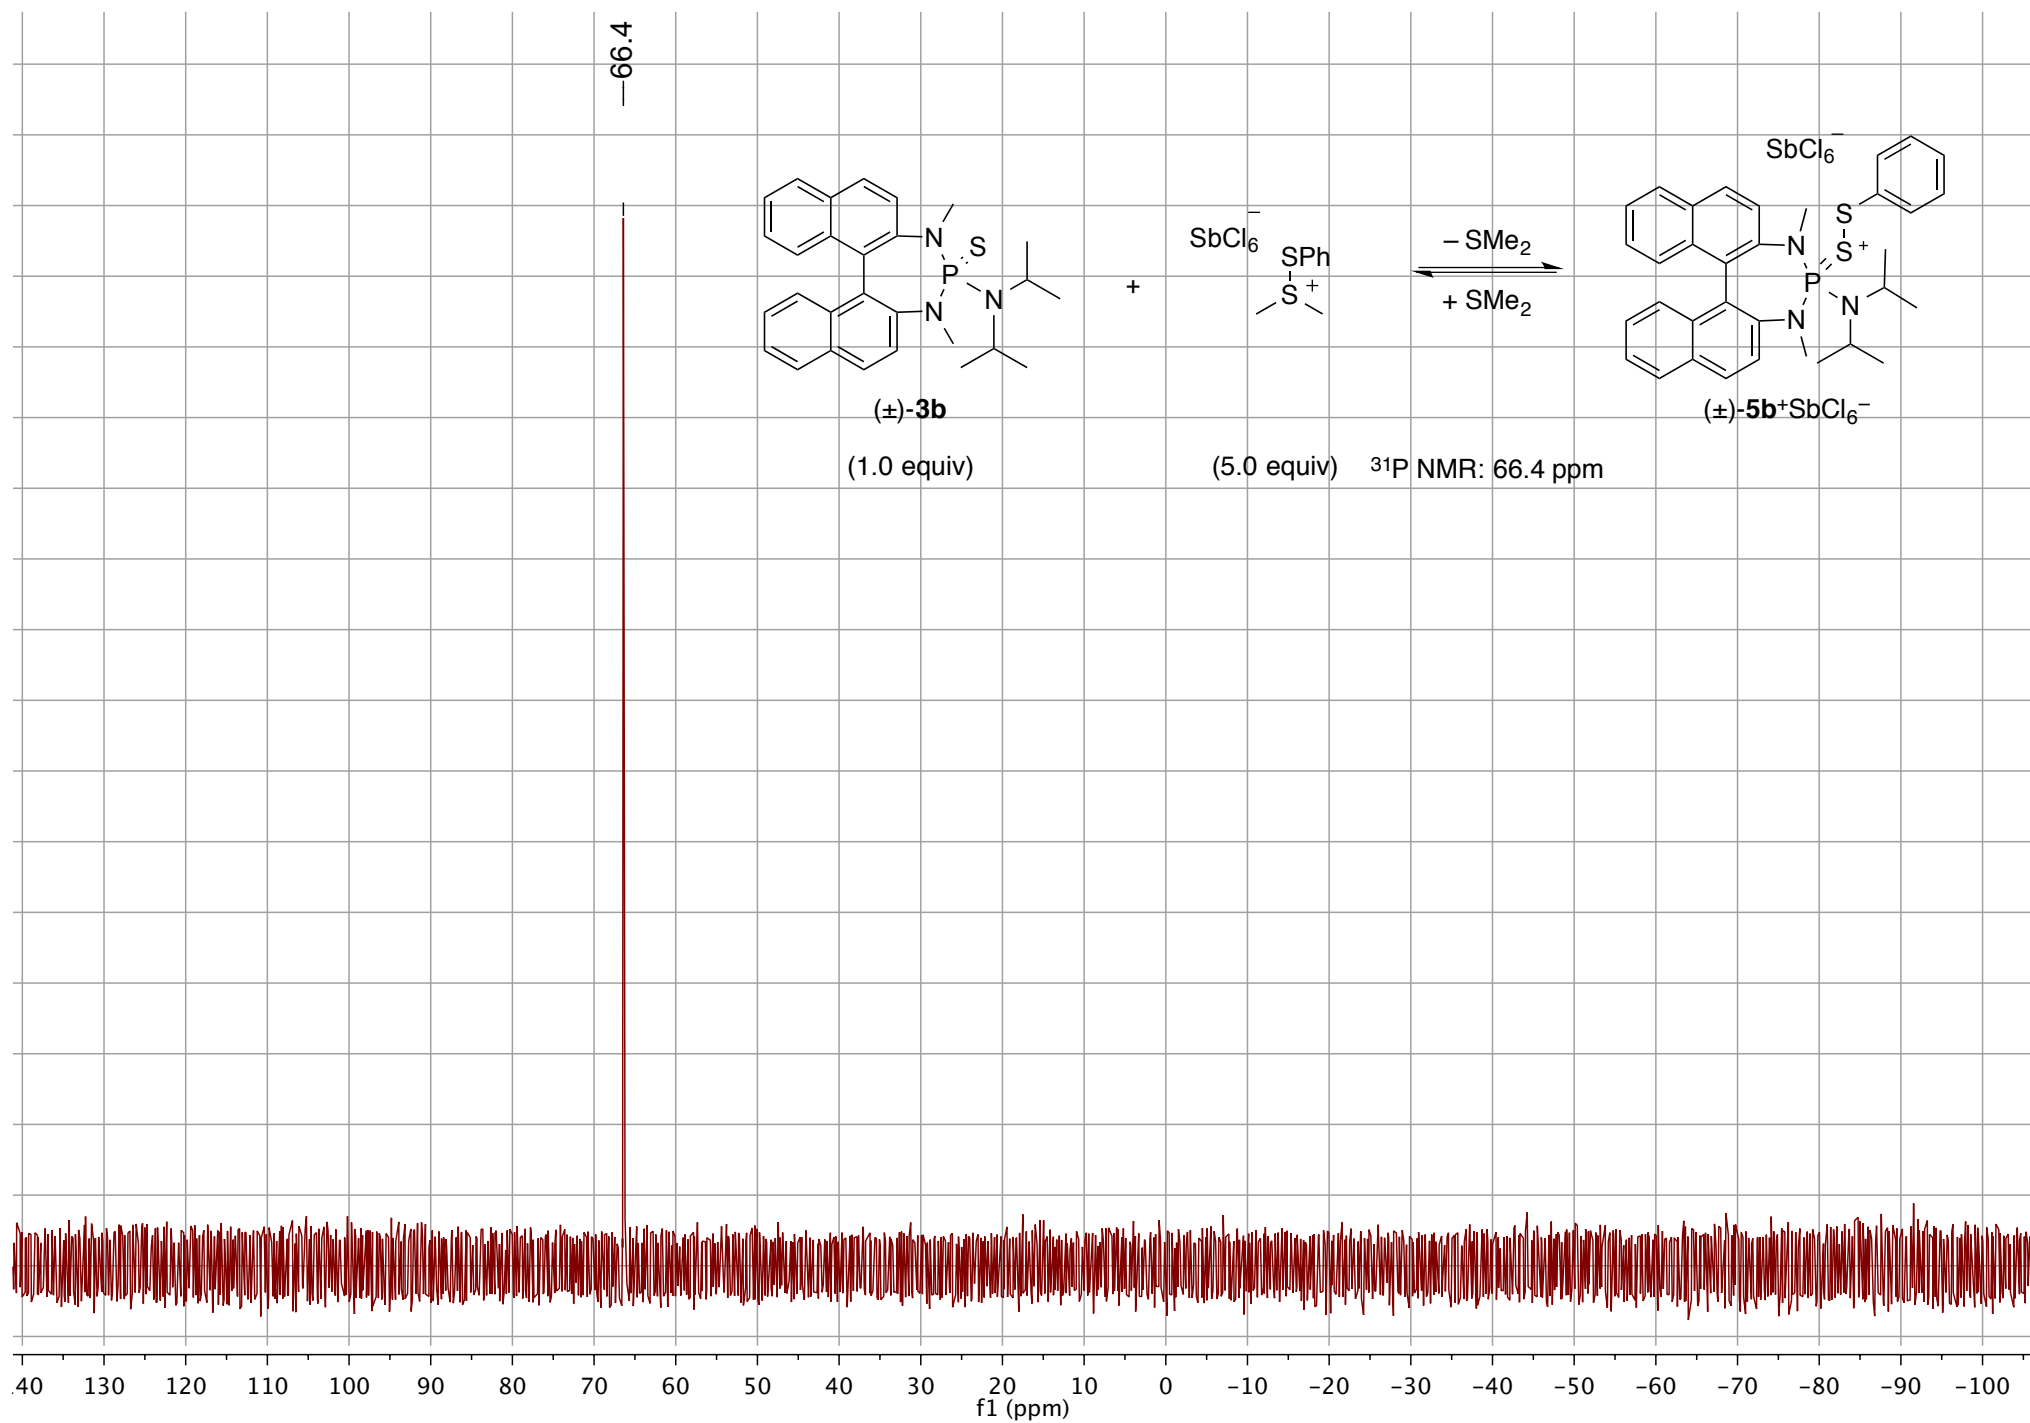



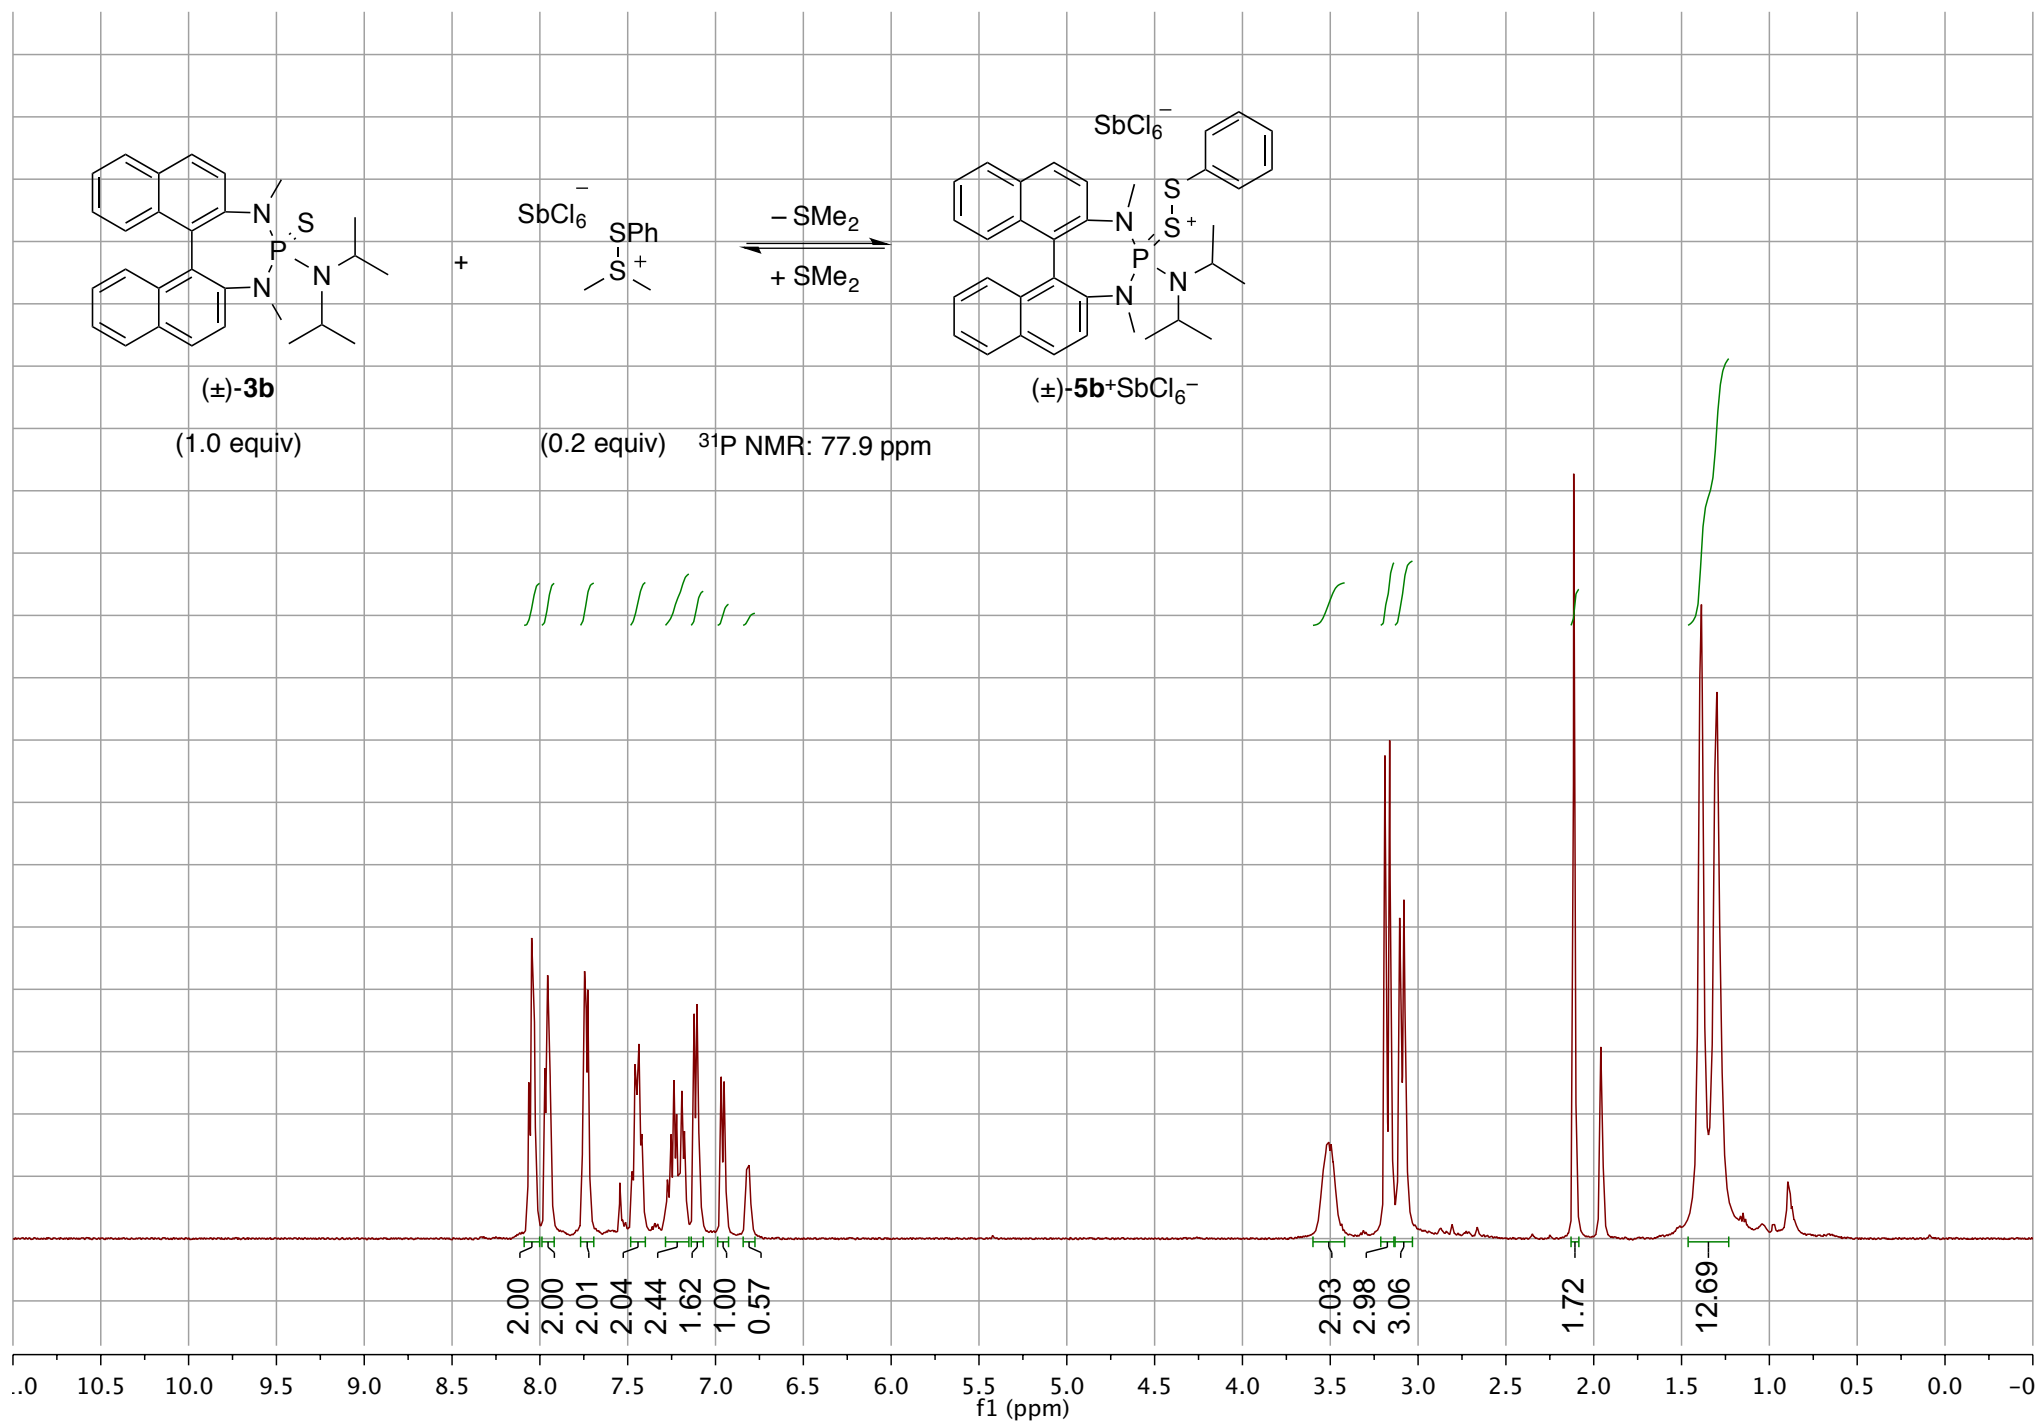

-77.9

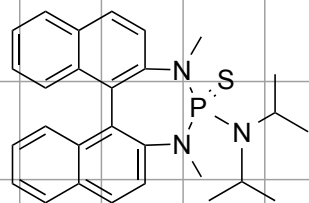

(±)-**3b**  
(1.0 equiv)

+

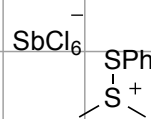

(0.2 equiv)  $^{31}\text{P}$  NMR: 77.9 ppm

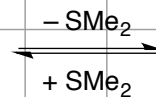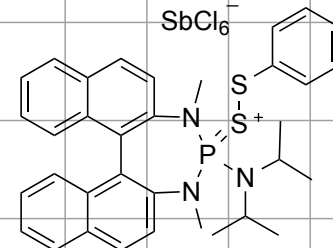

(±)-**5b**+ $\text{SbCl}_6^-$

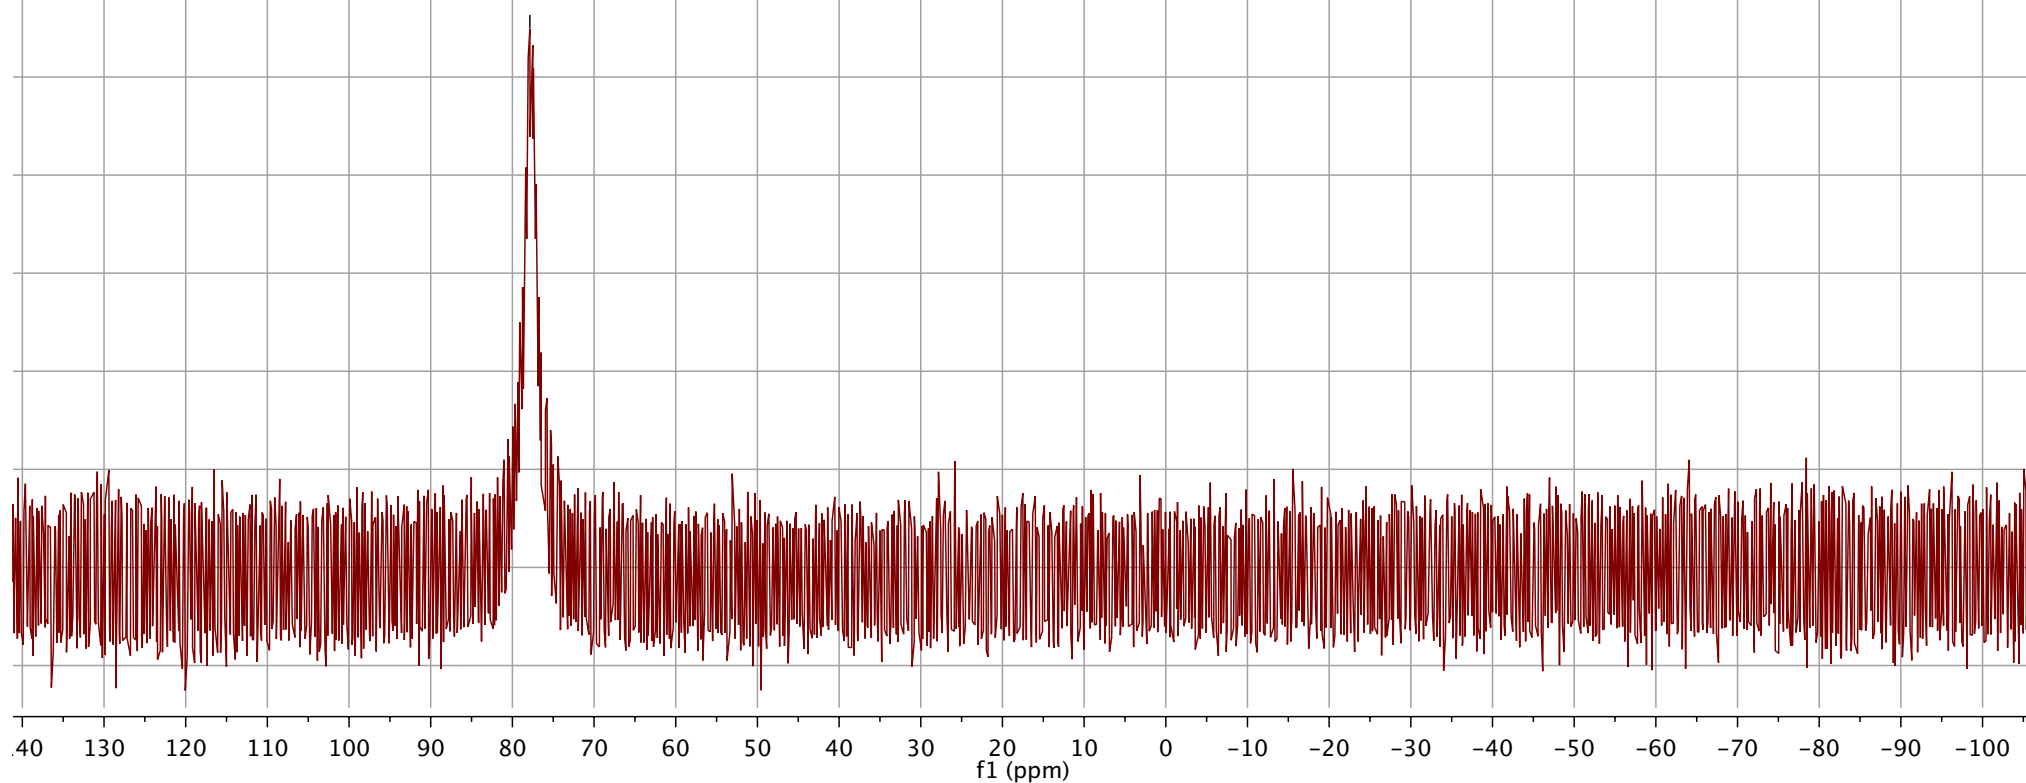

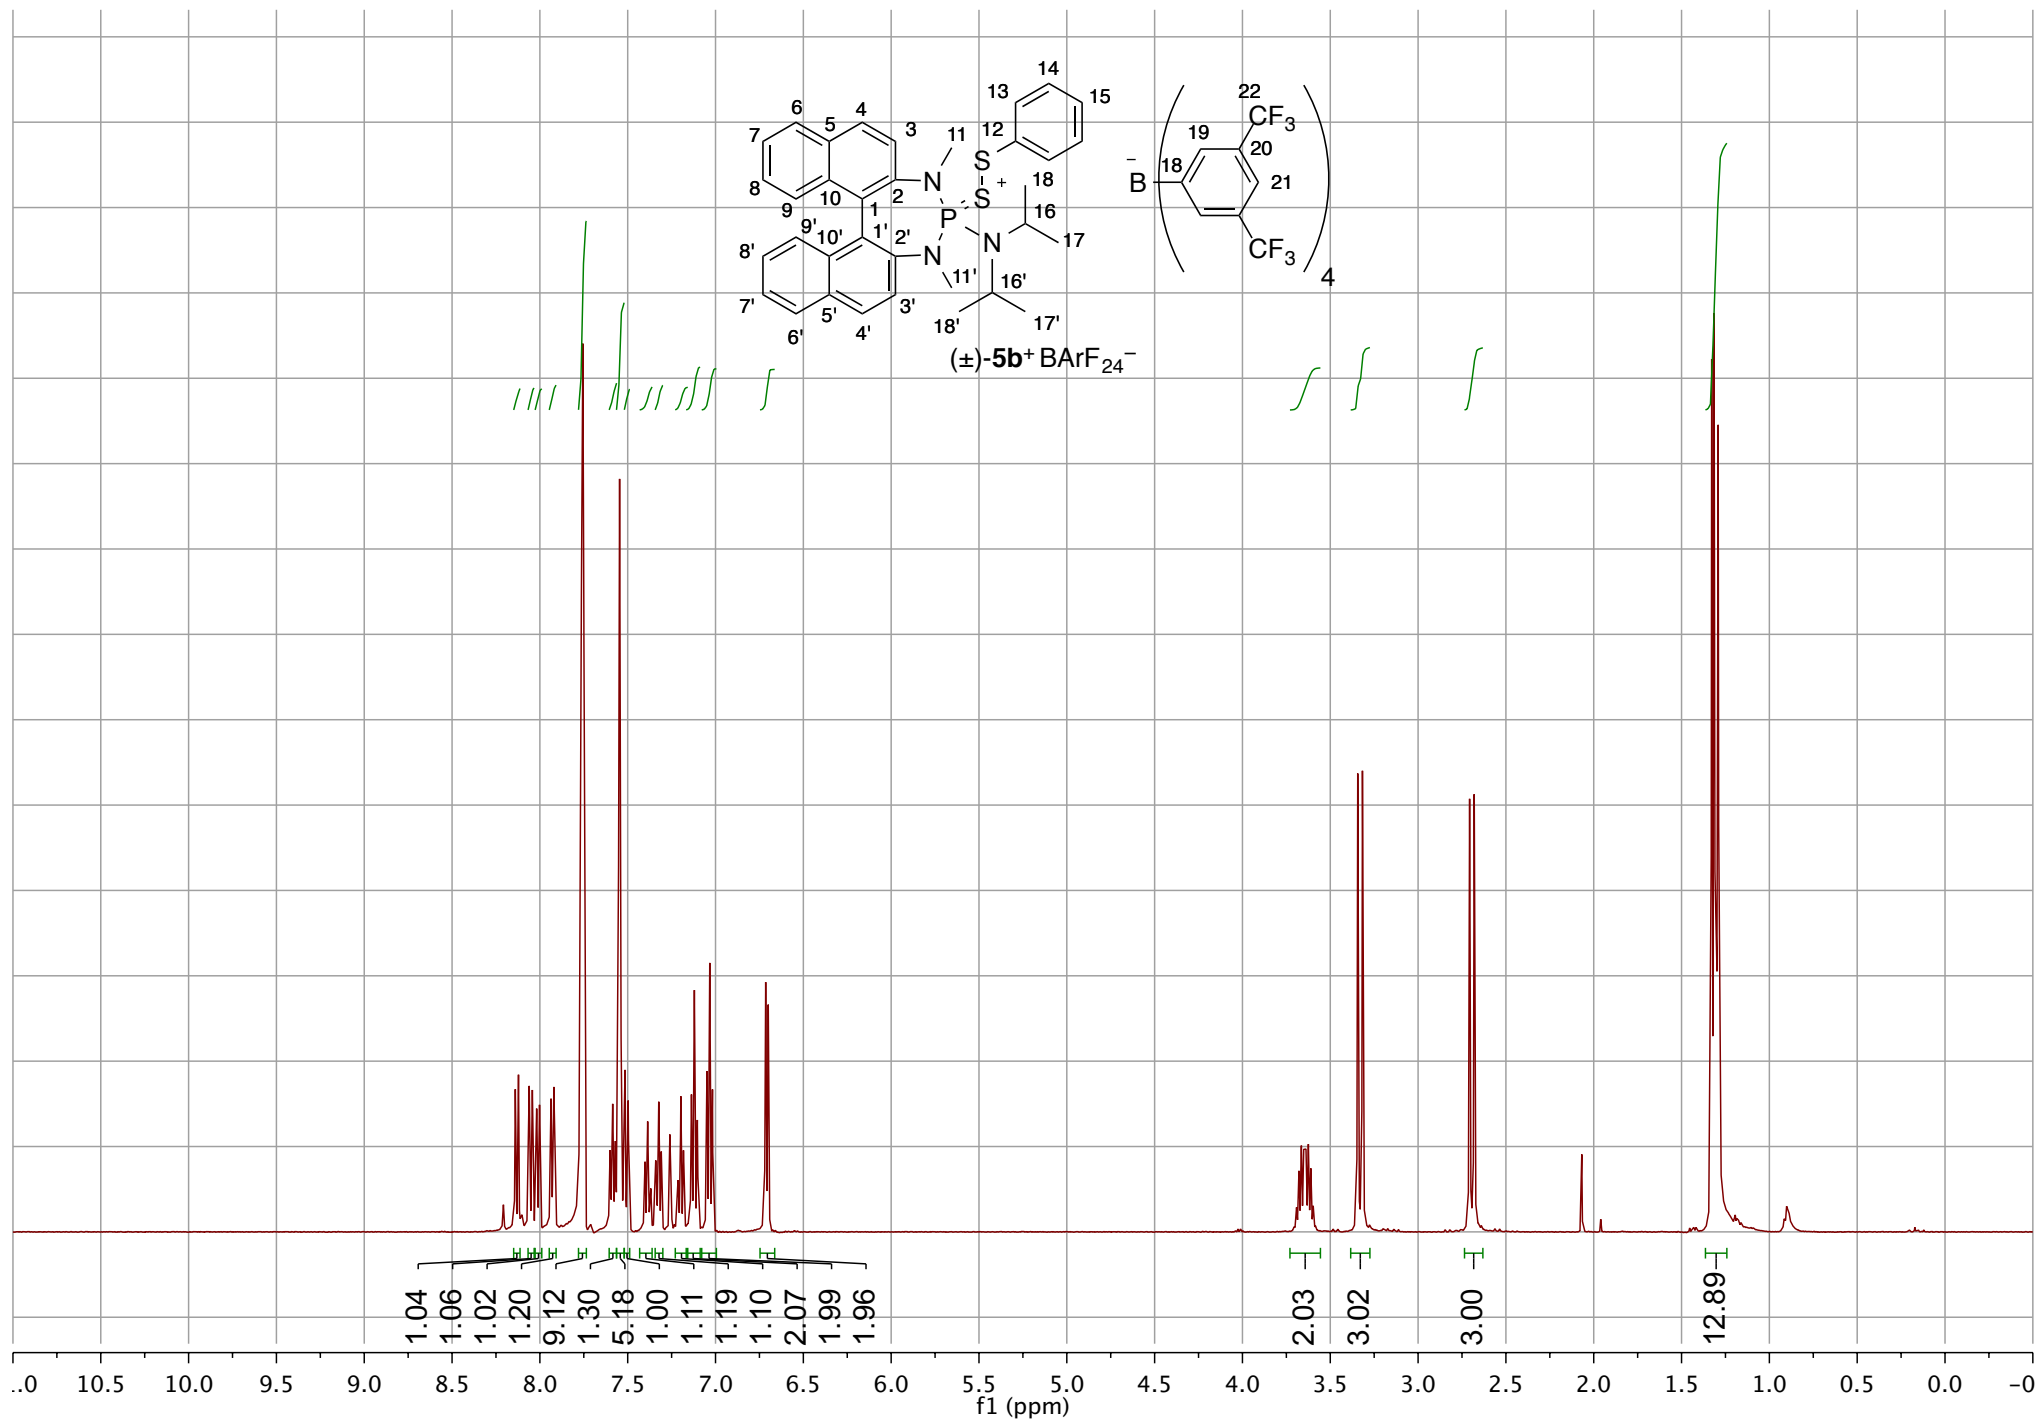

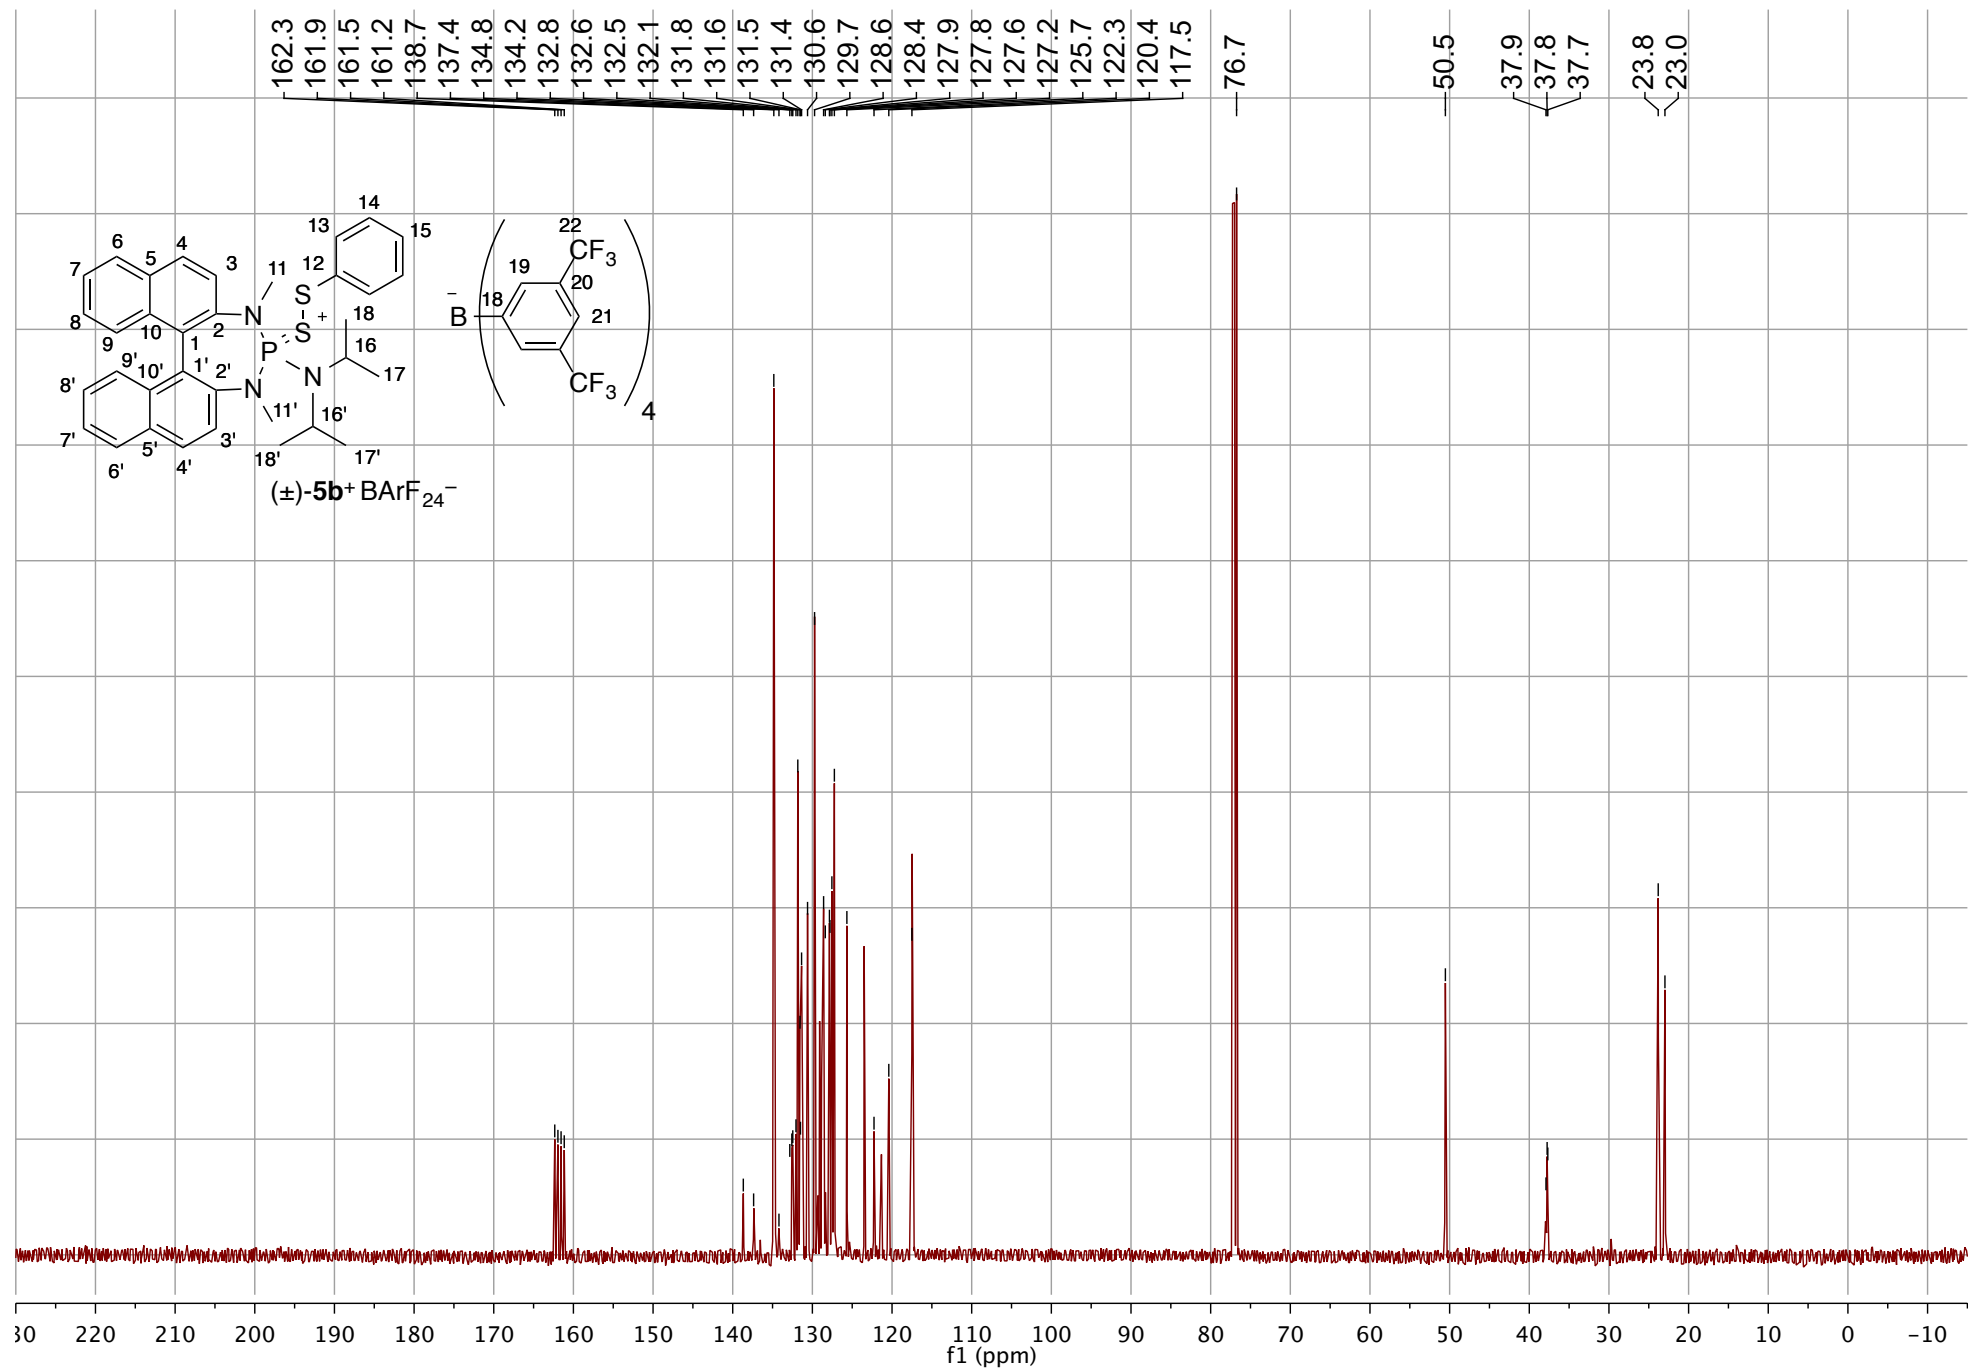

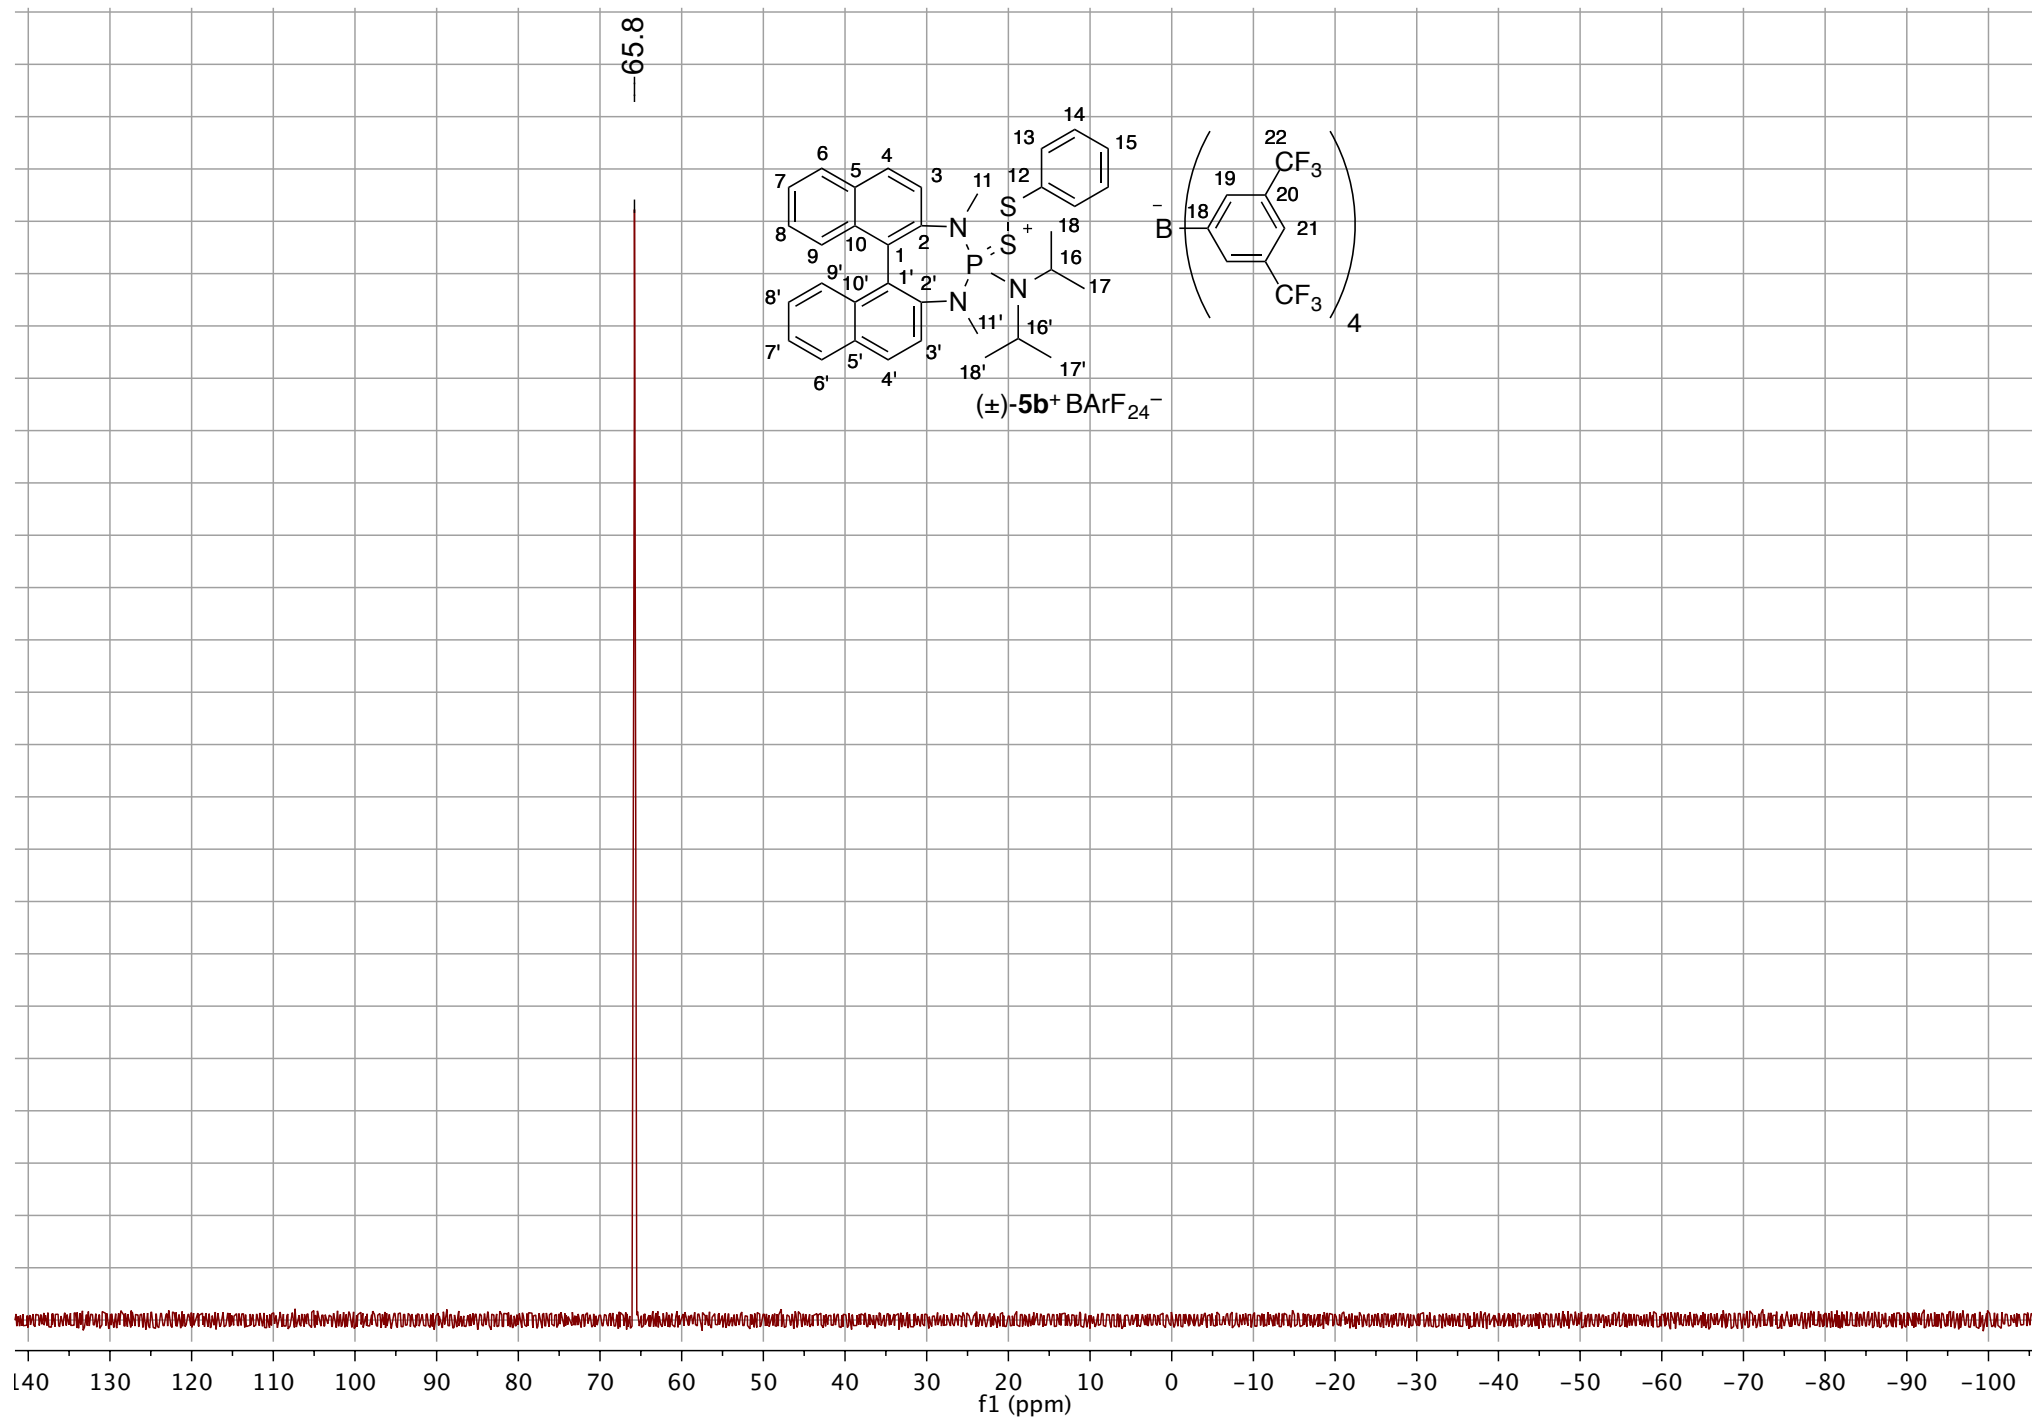

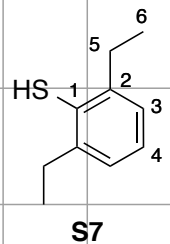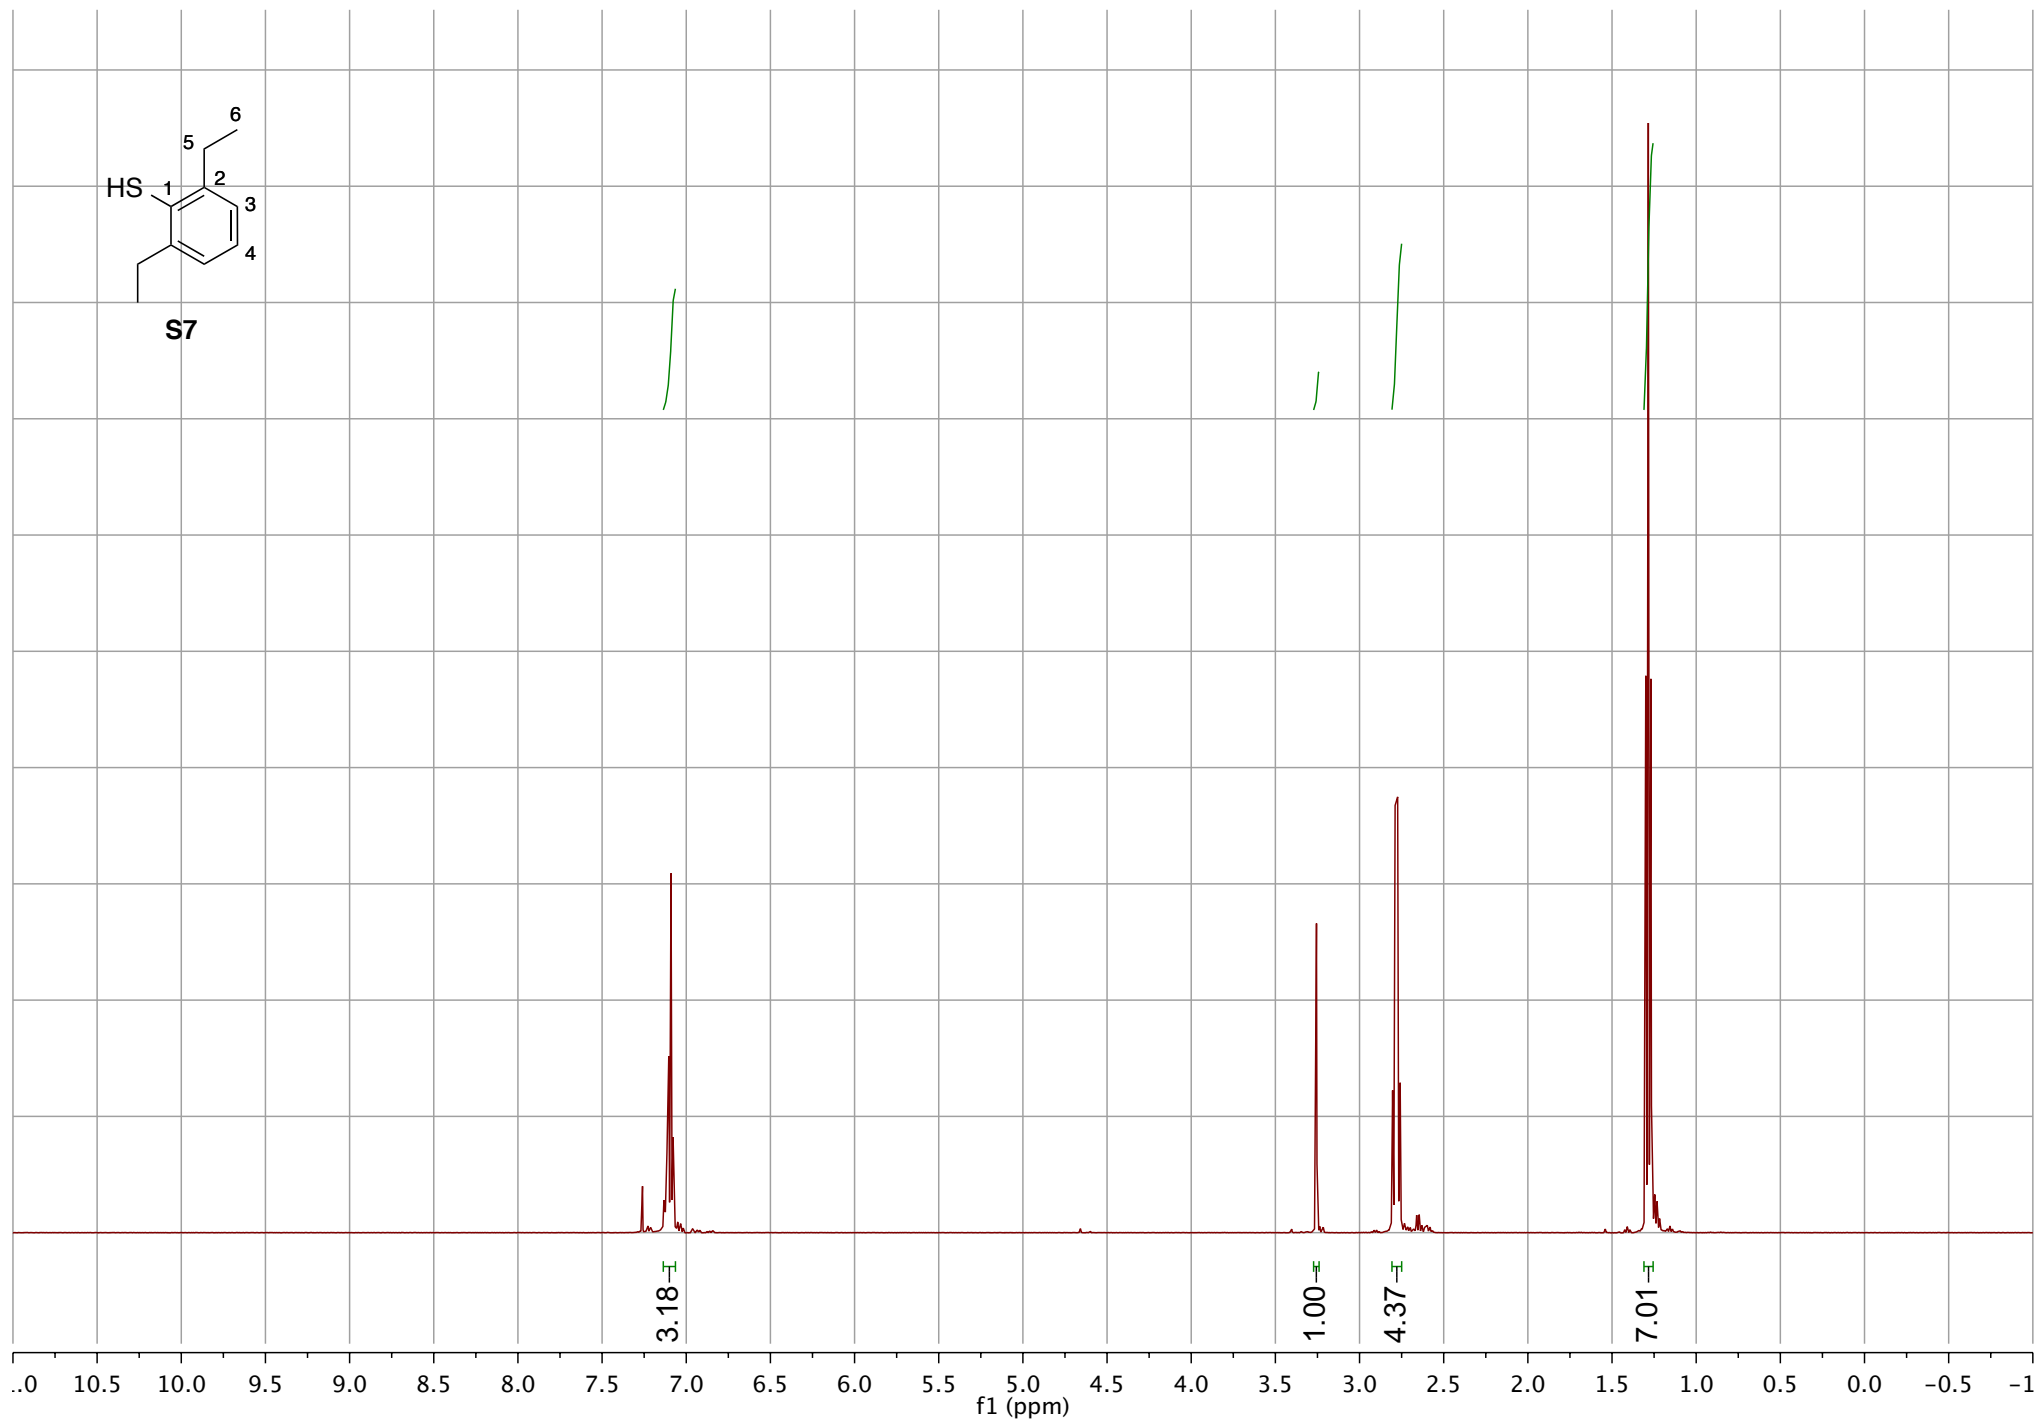

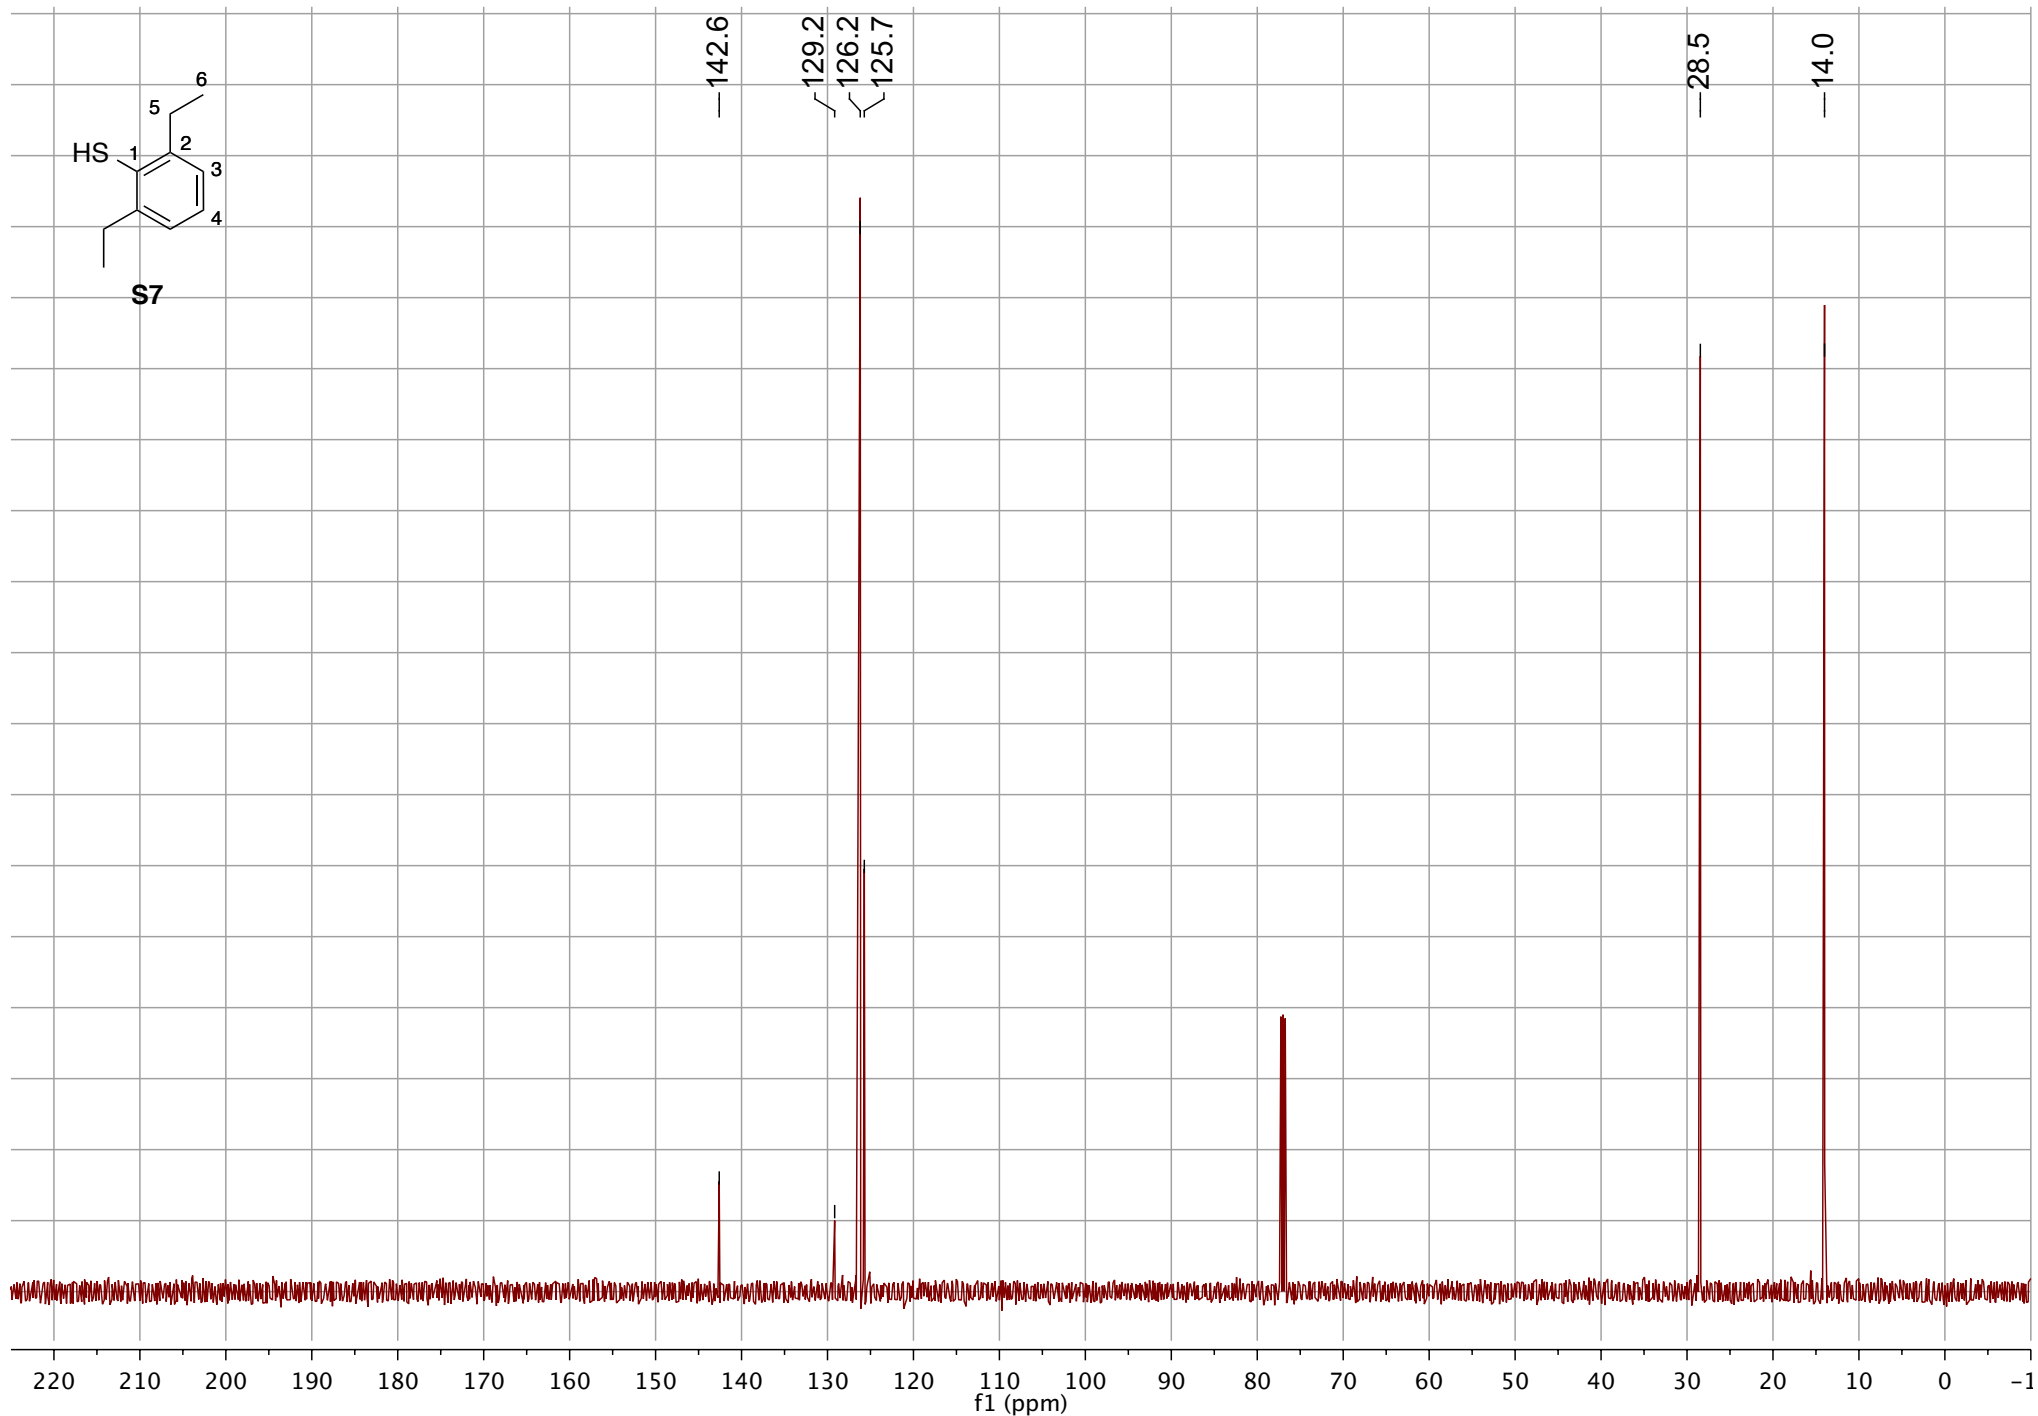

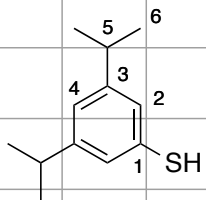

S11

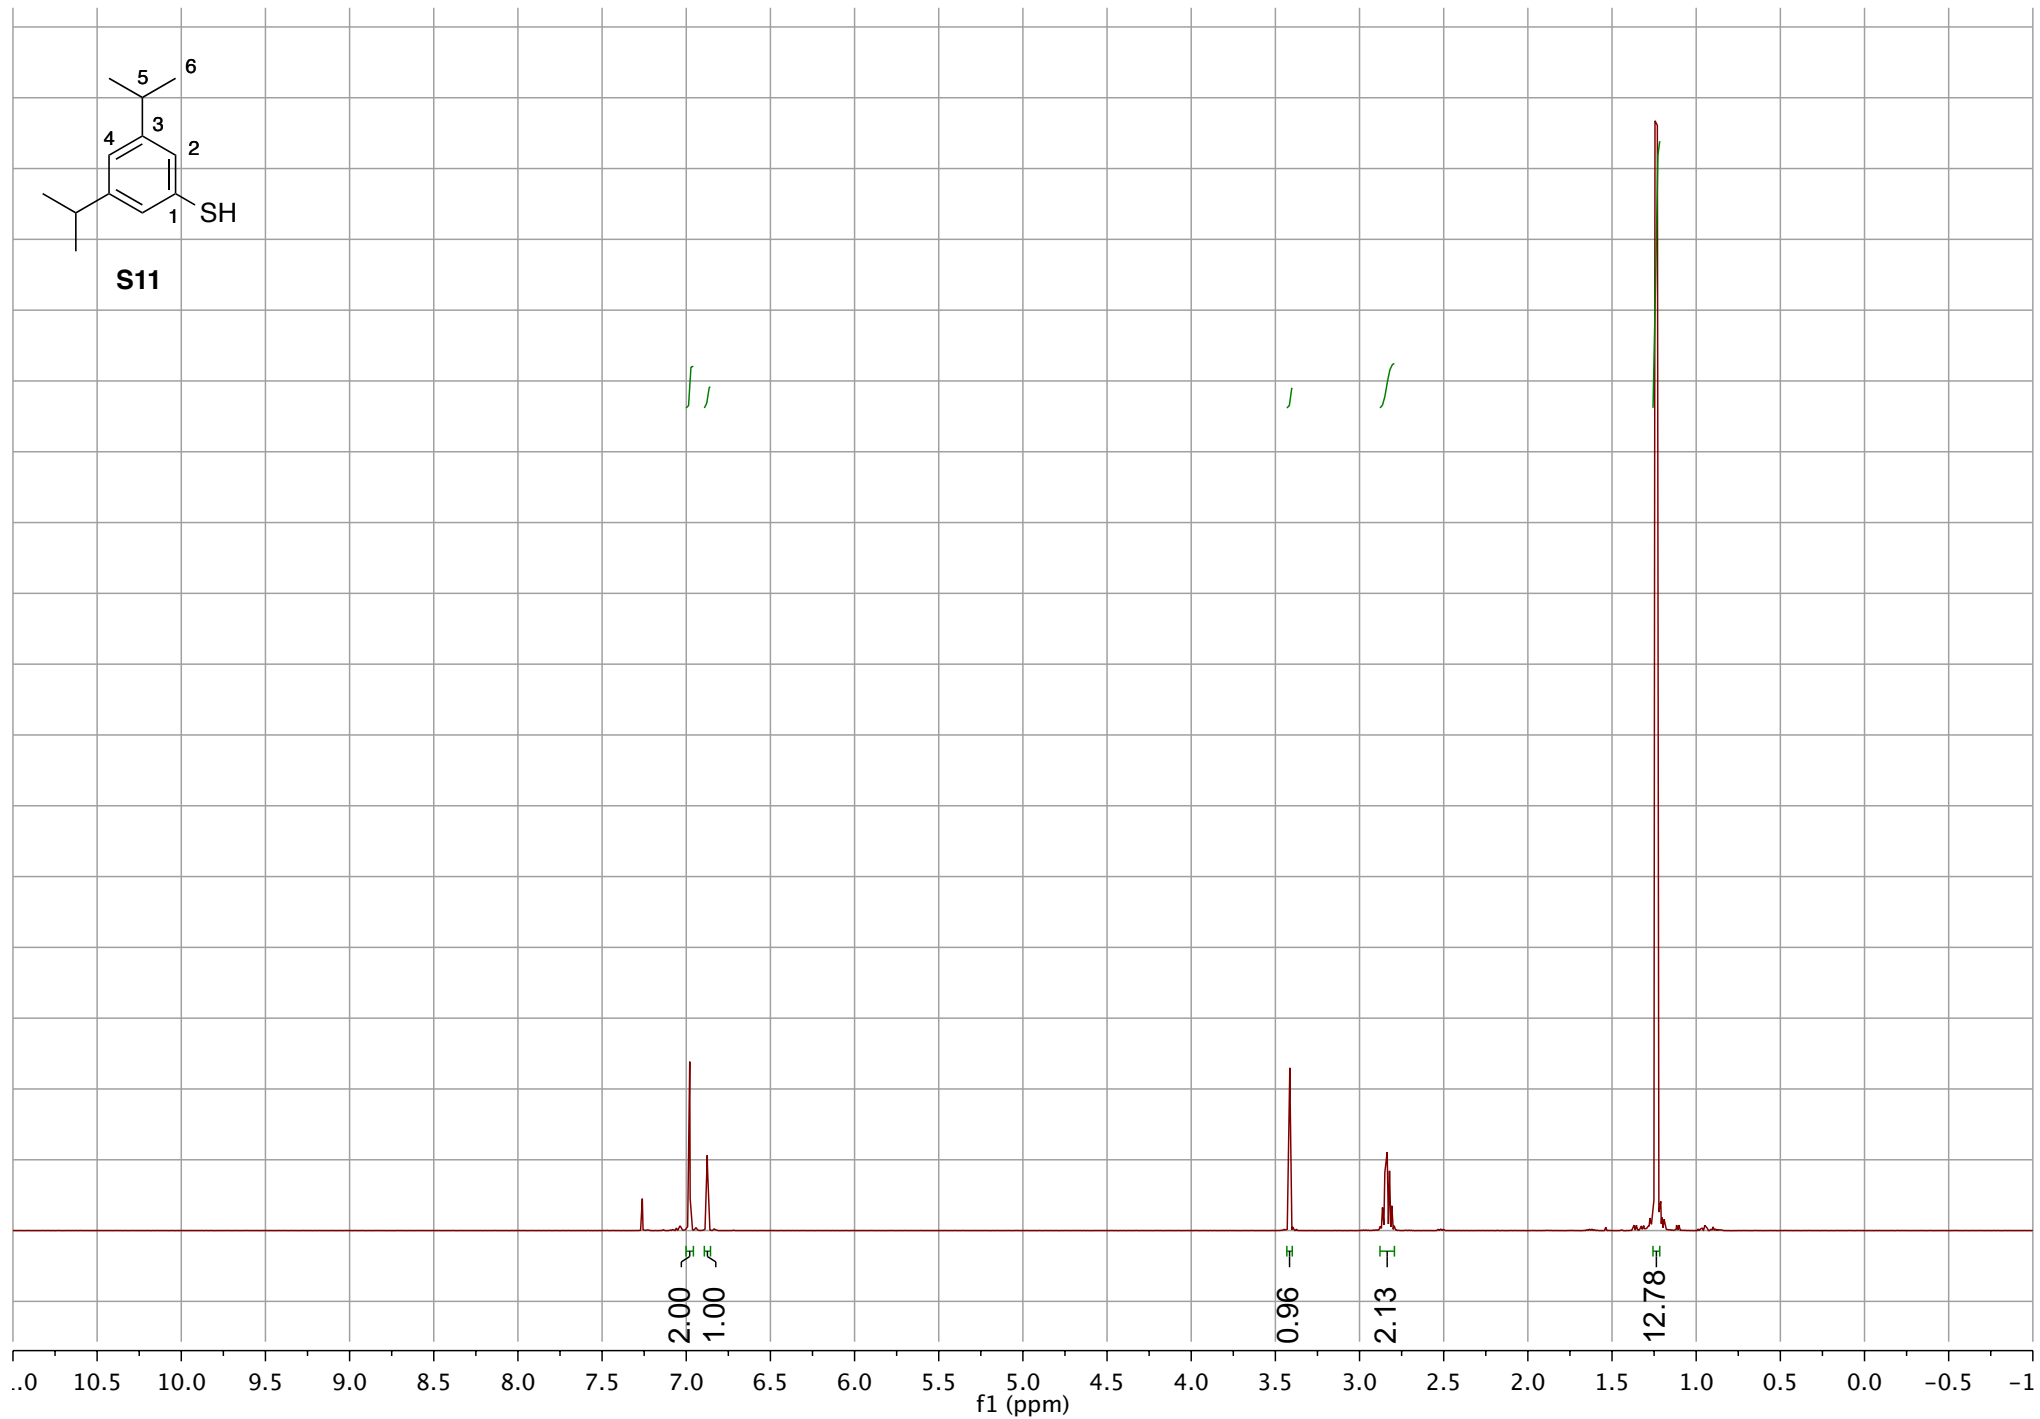



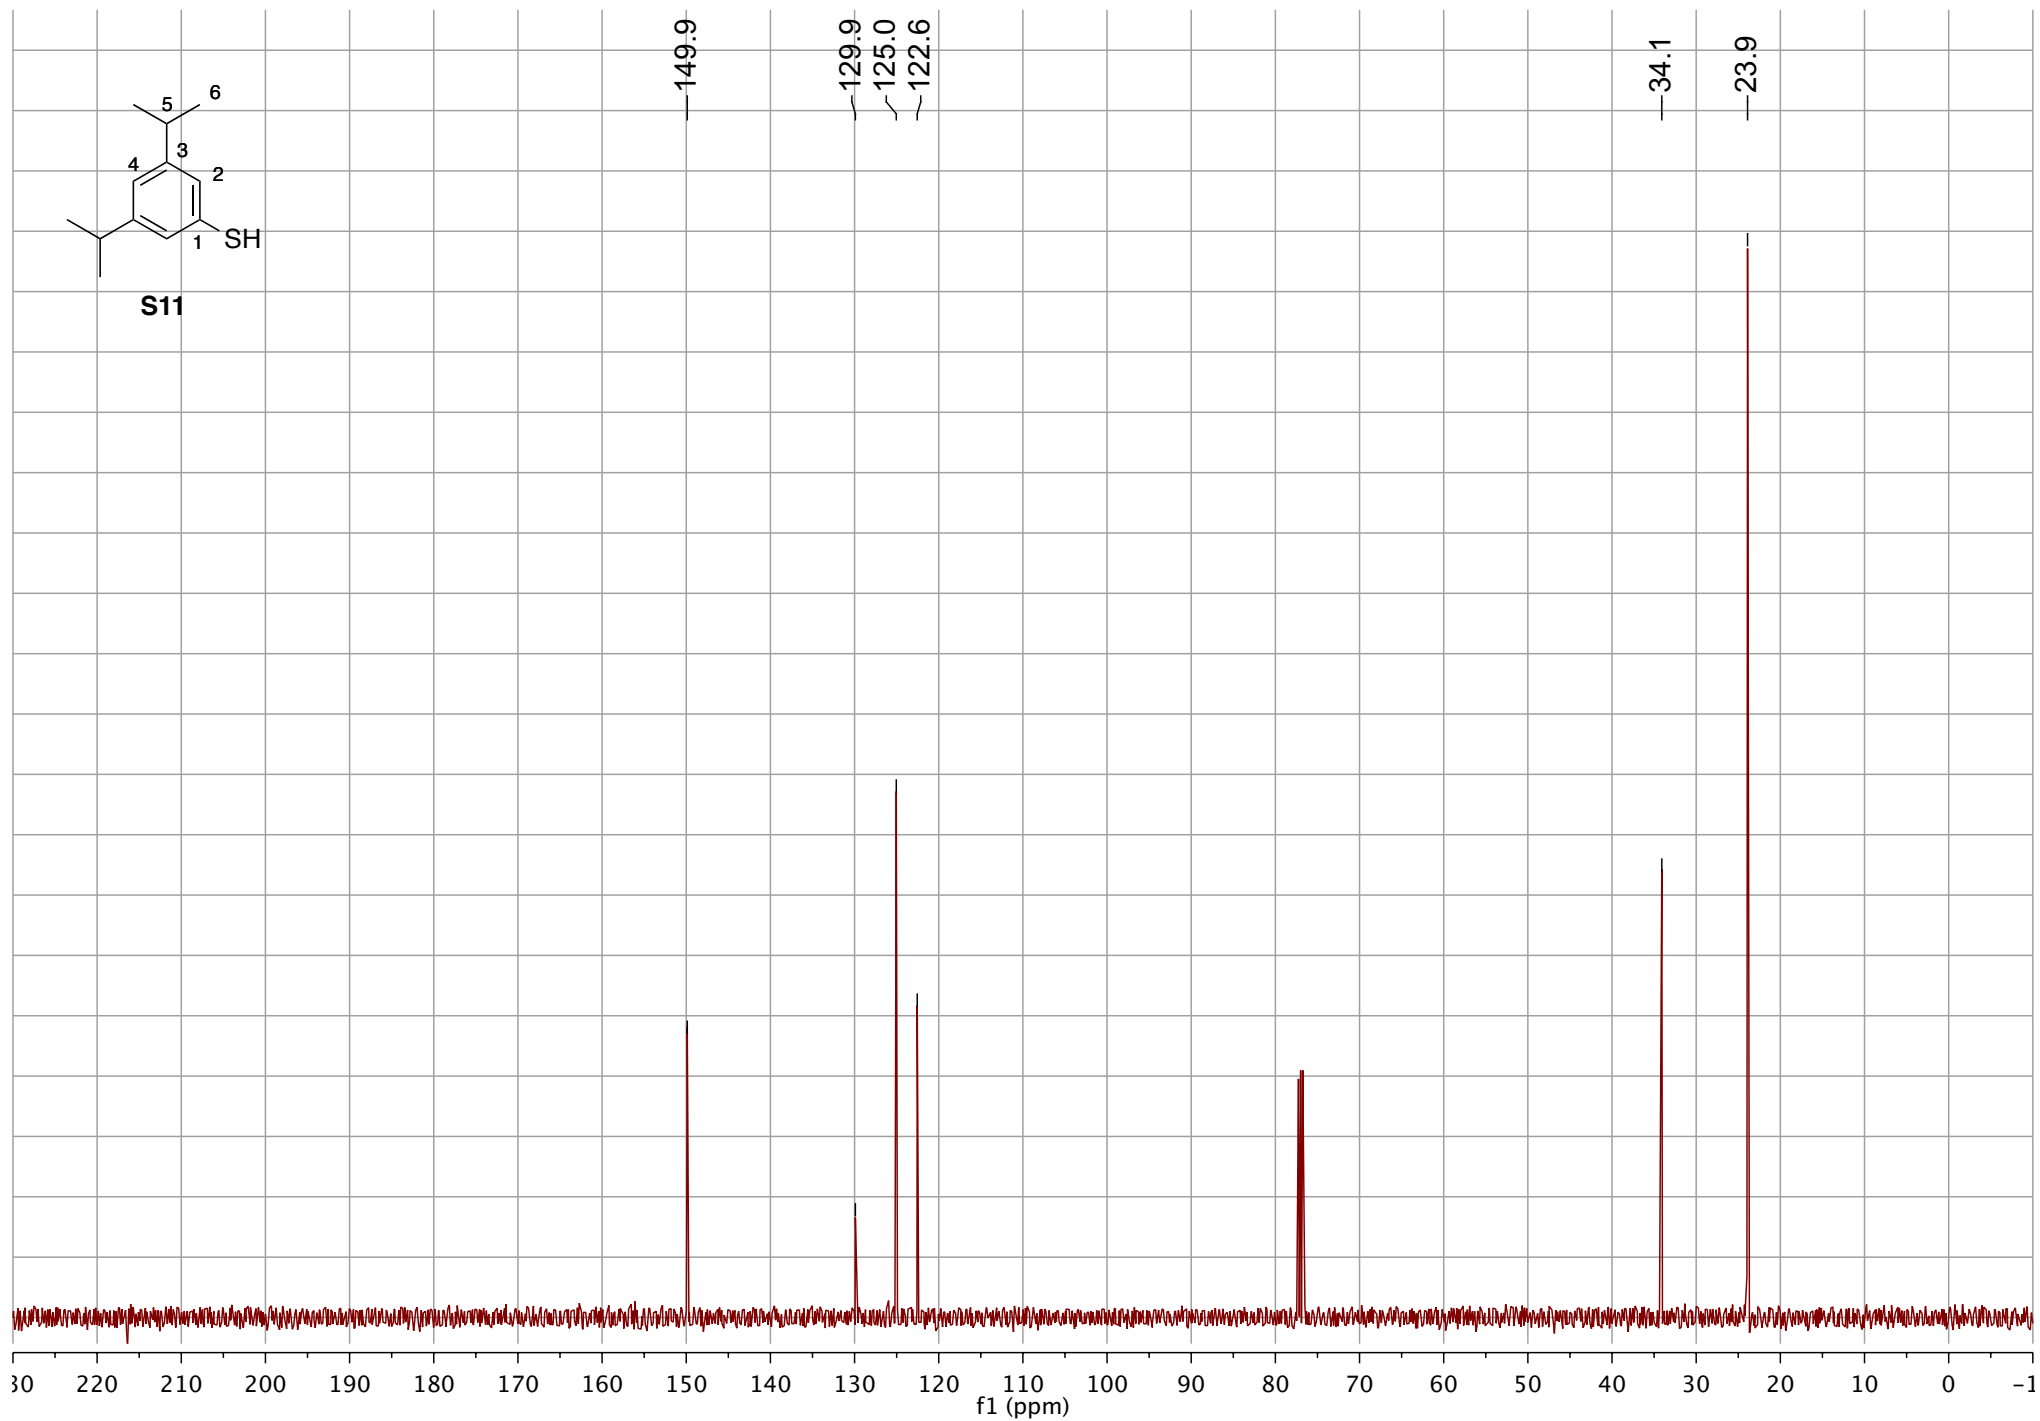

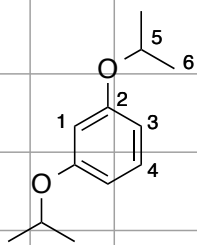

S12

+

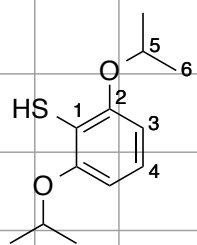

S13

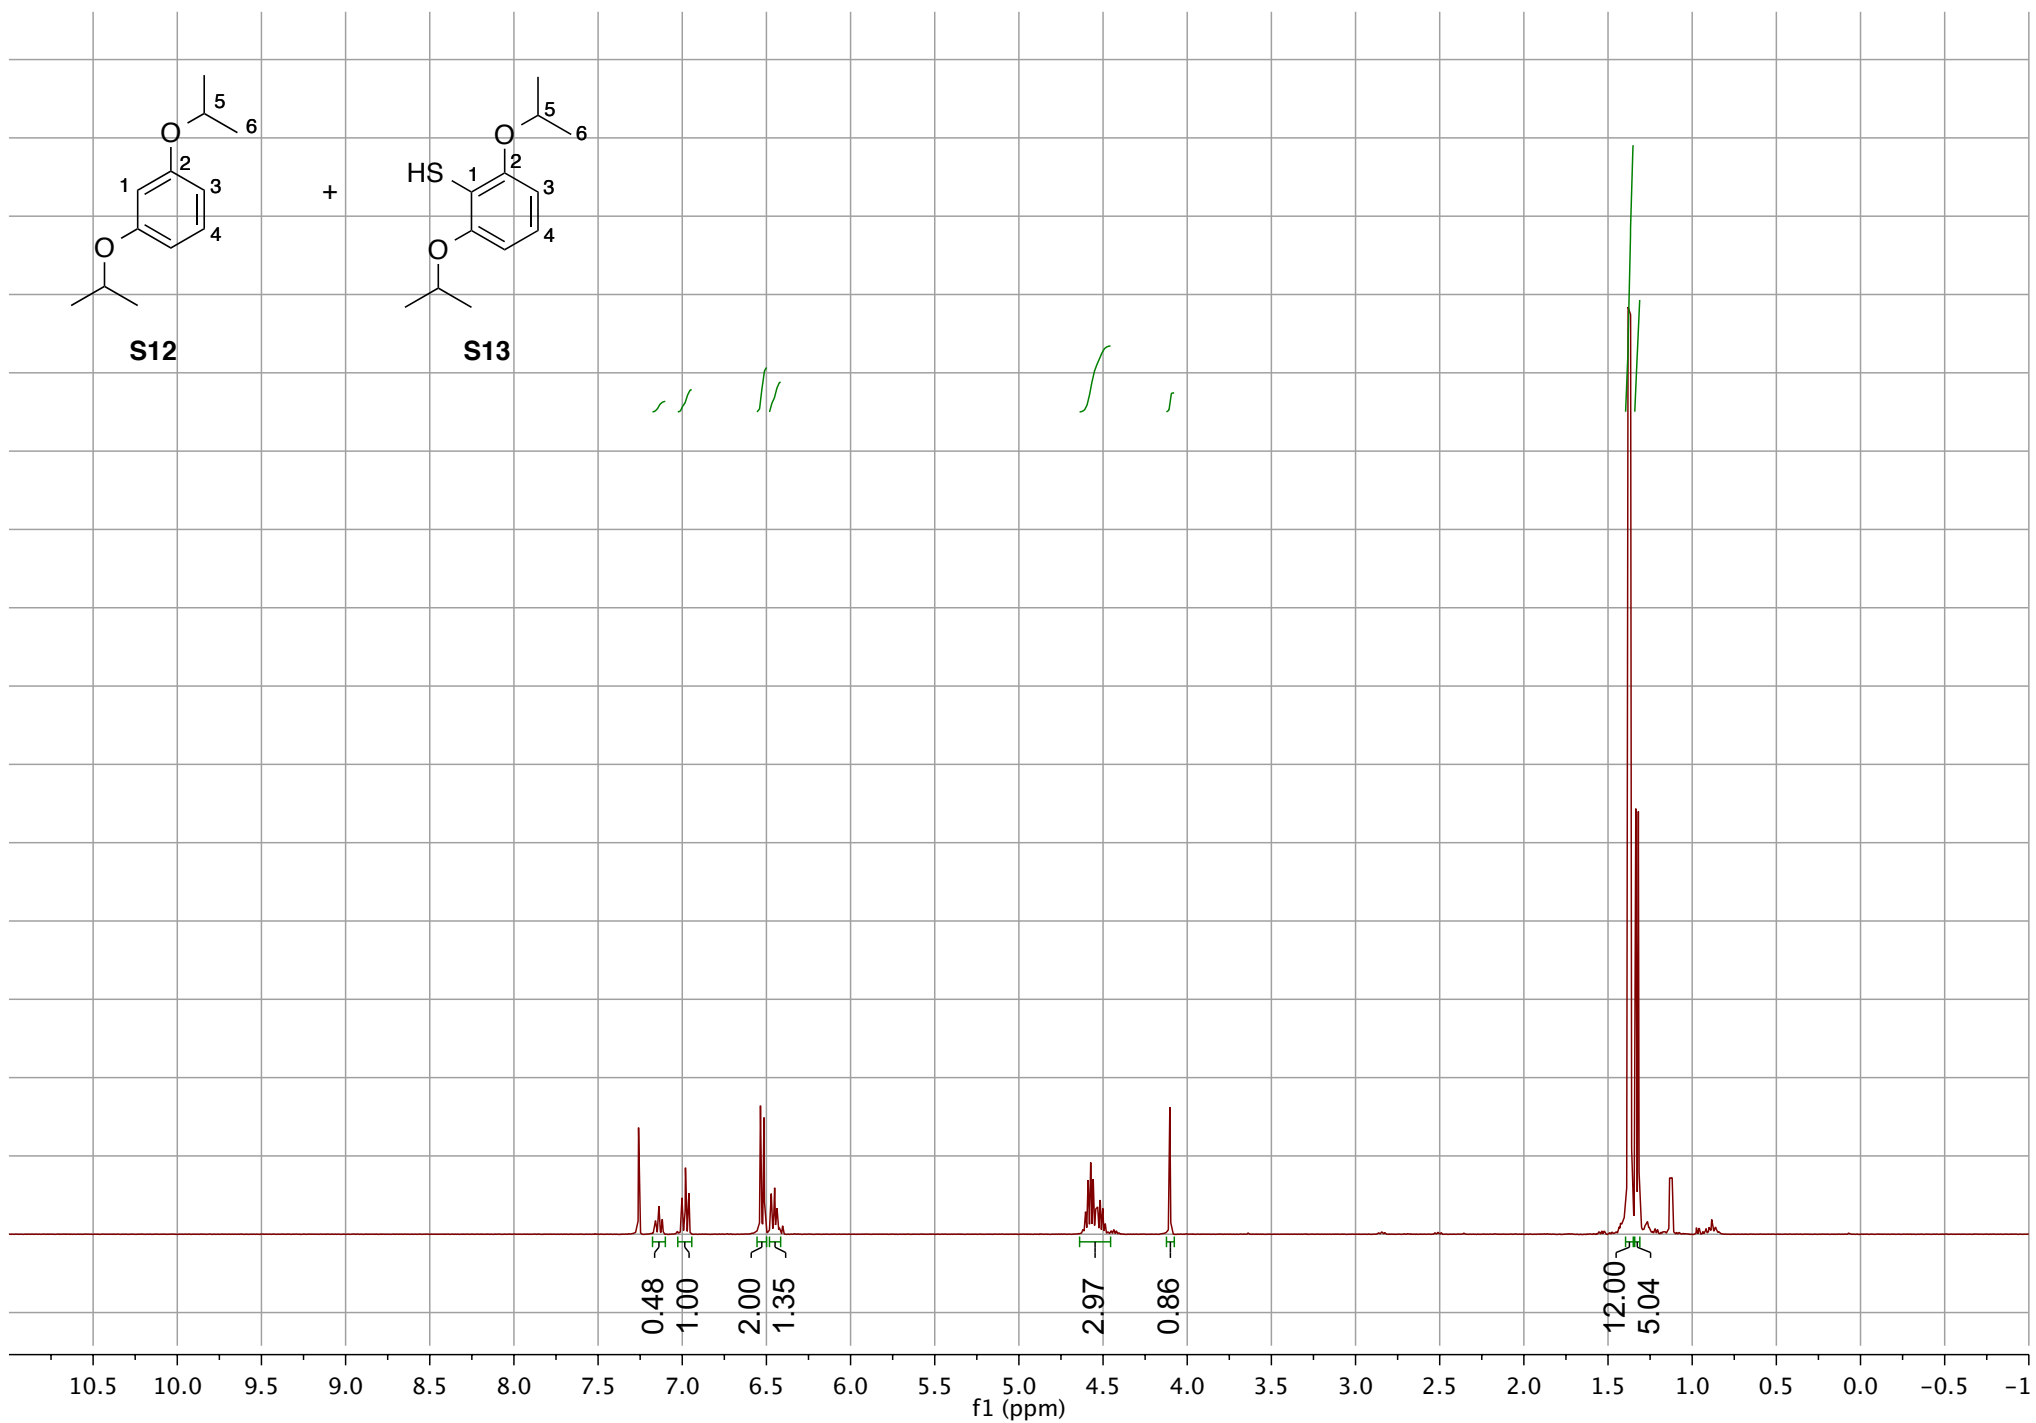

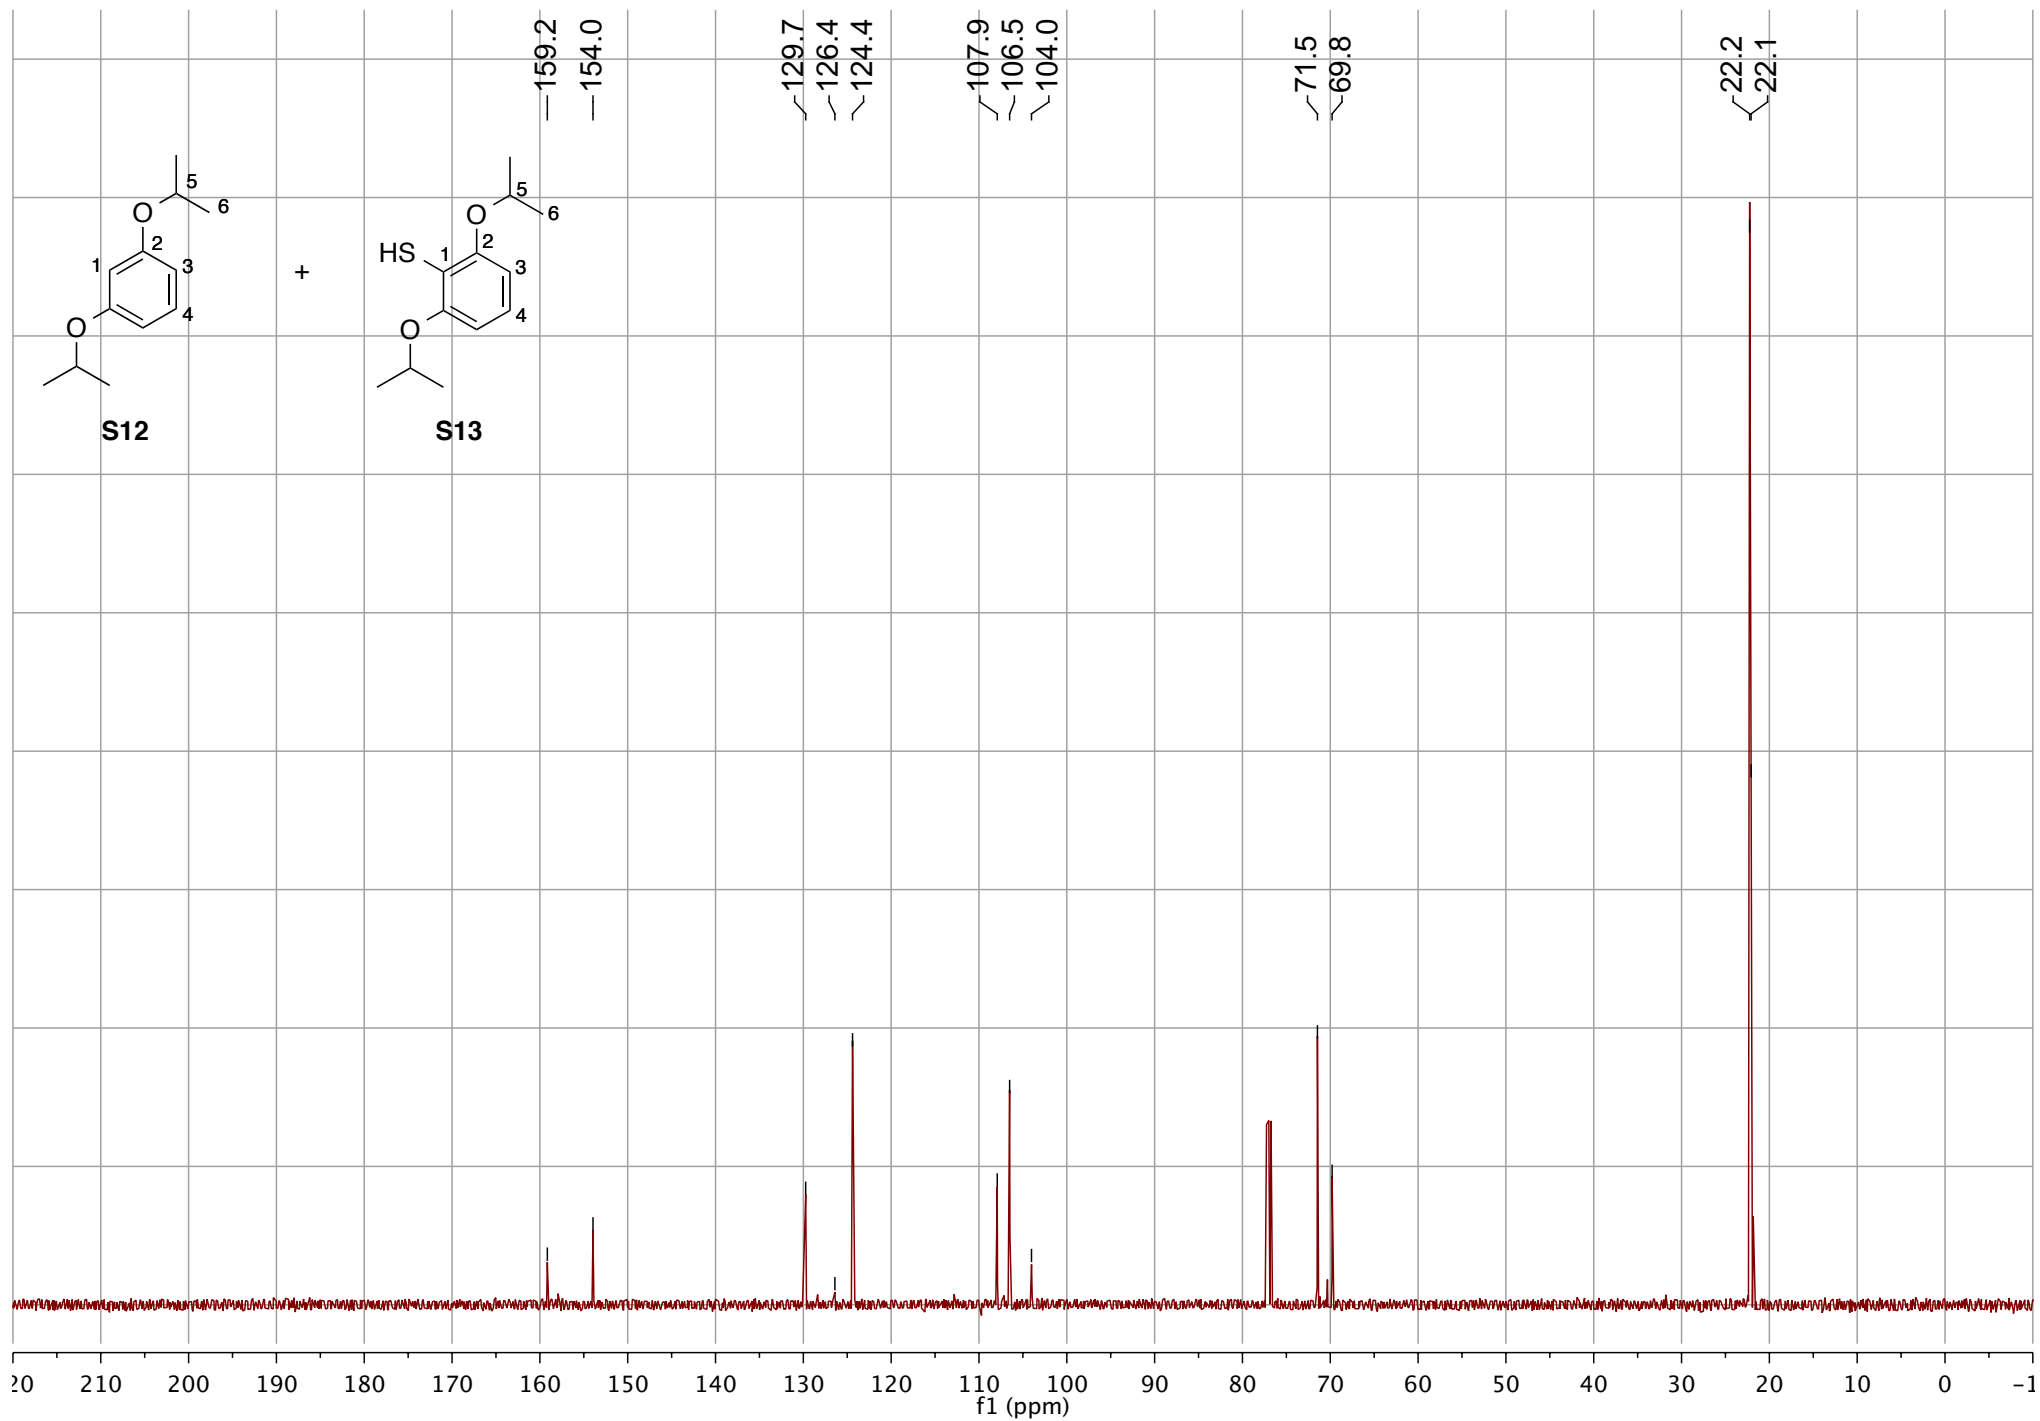

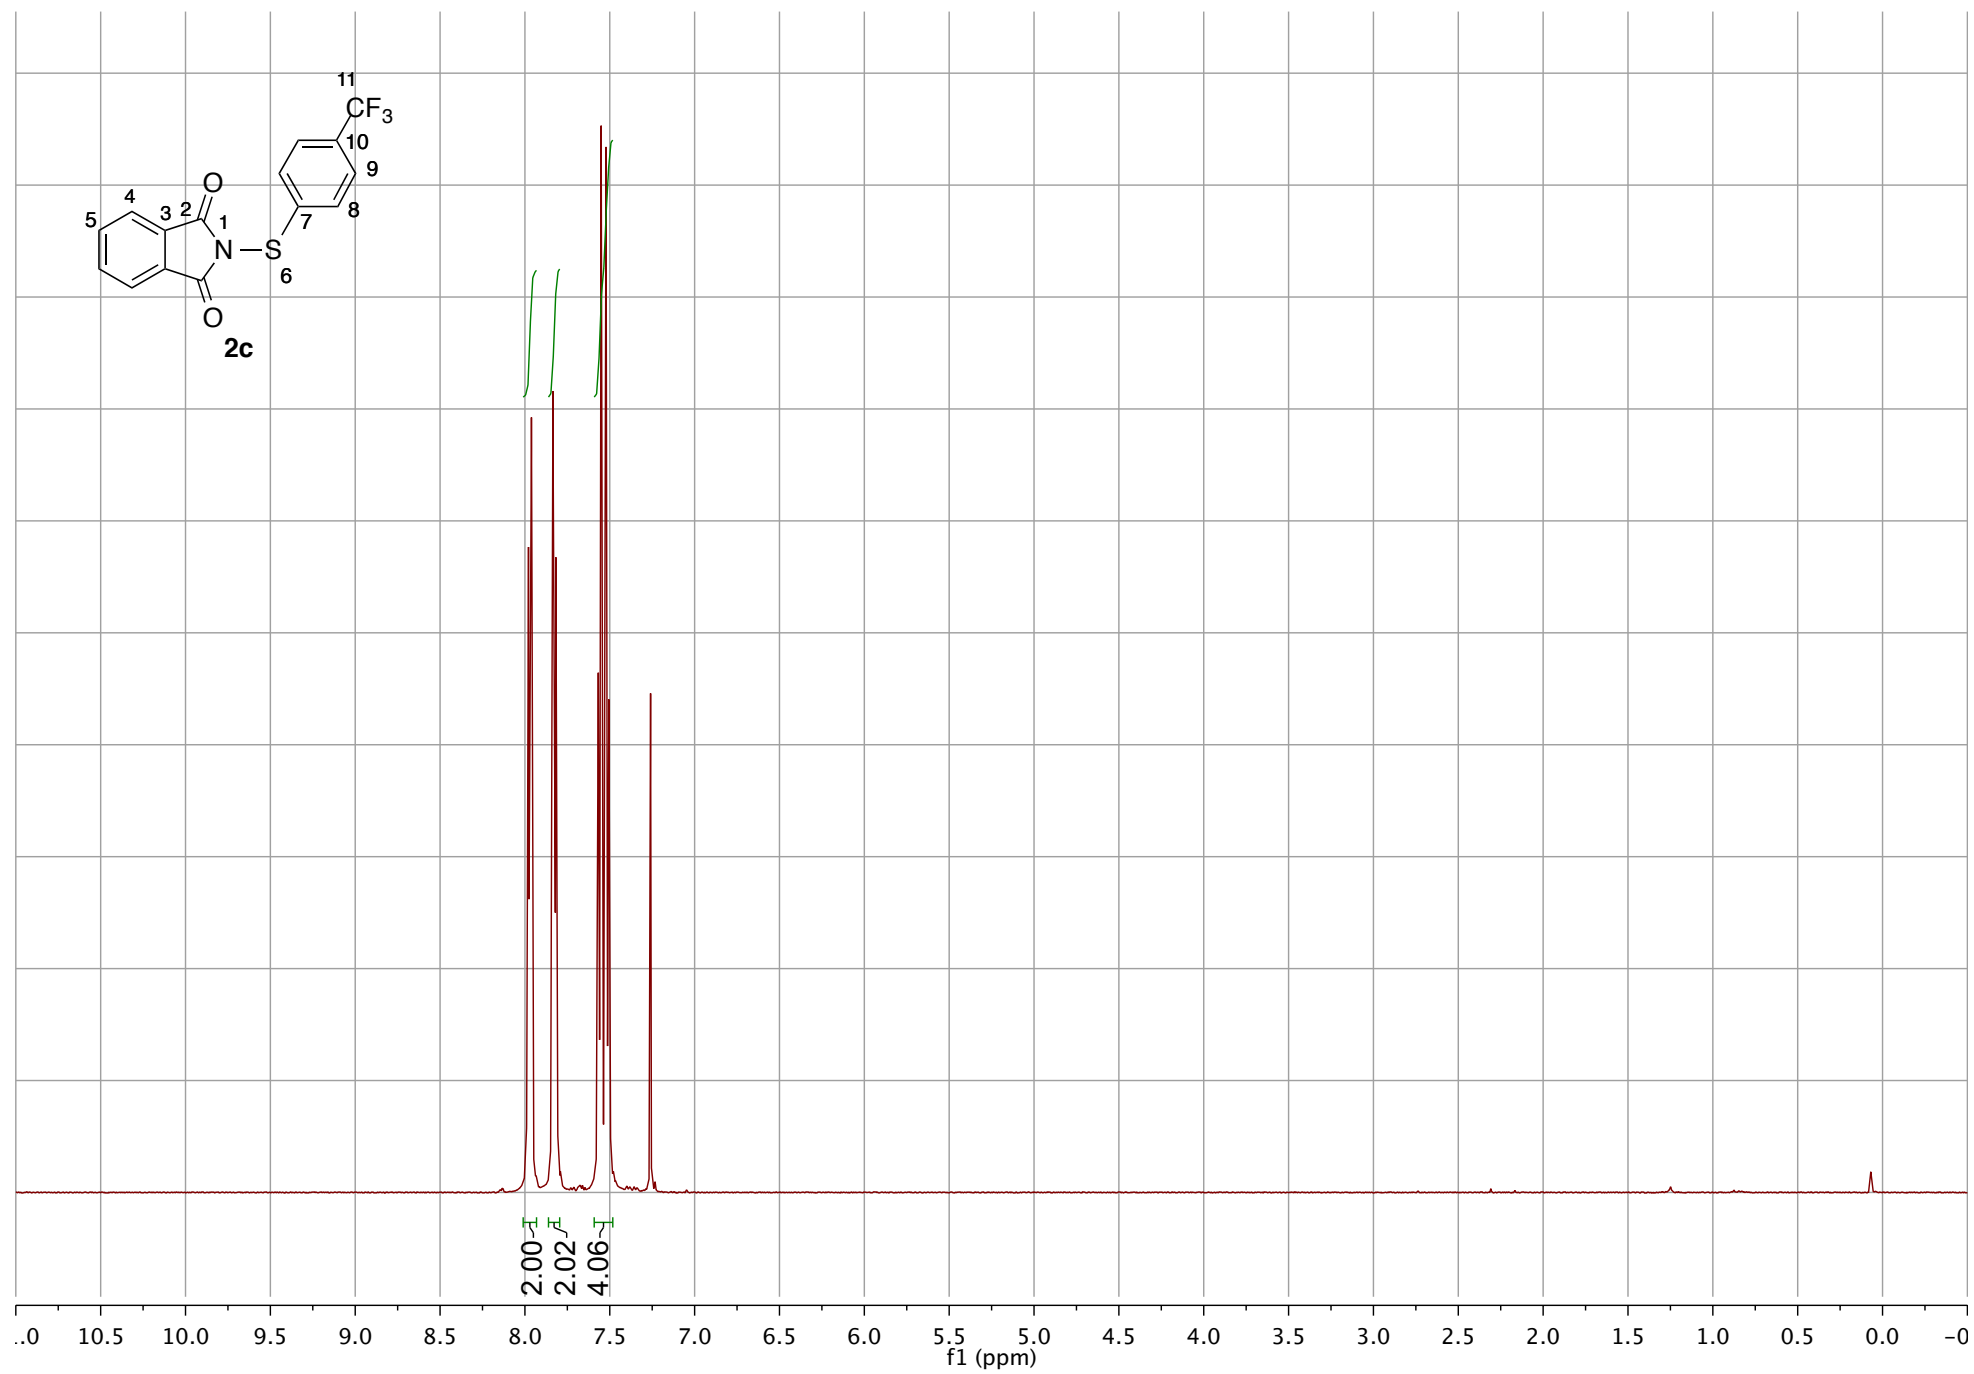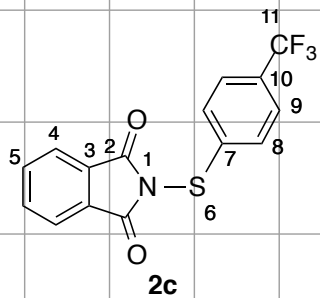

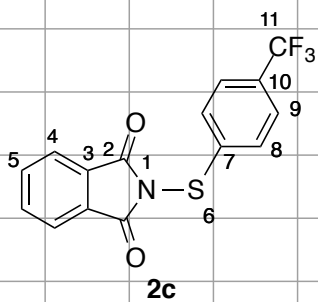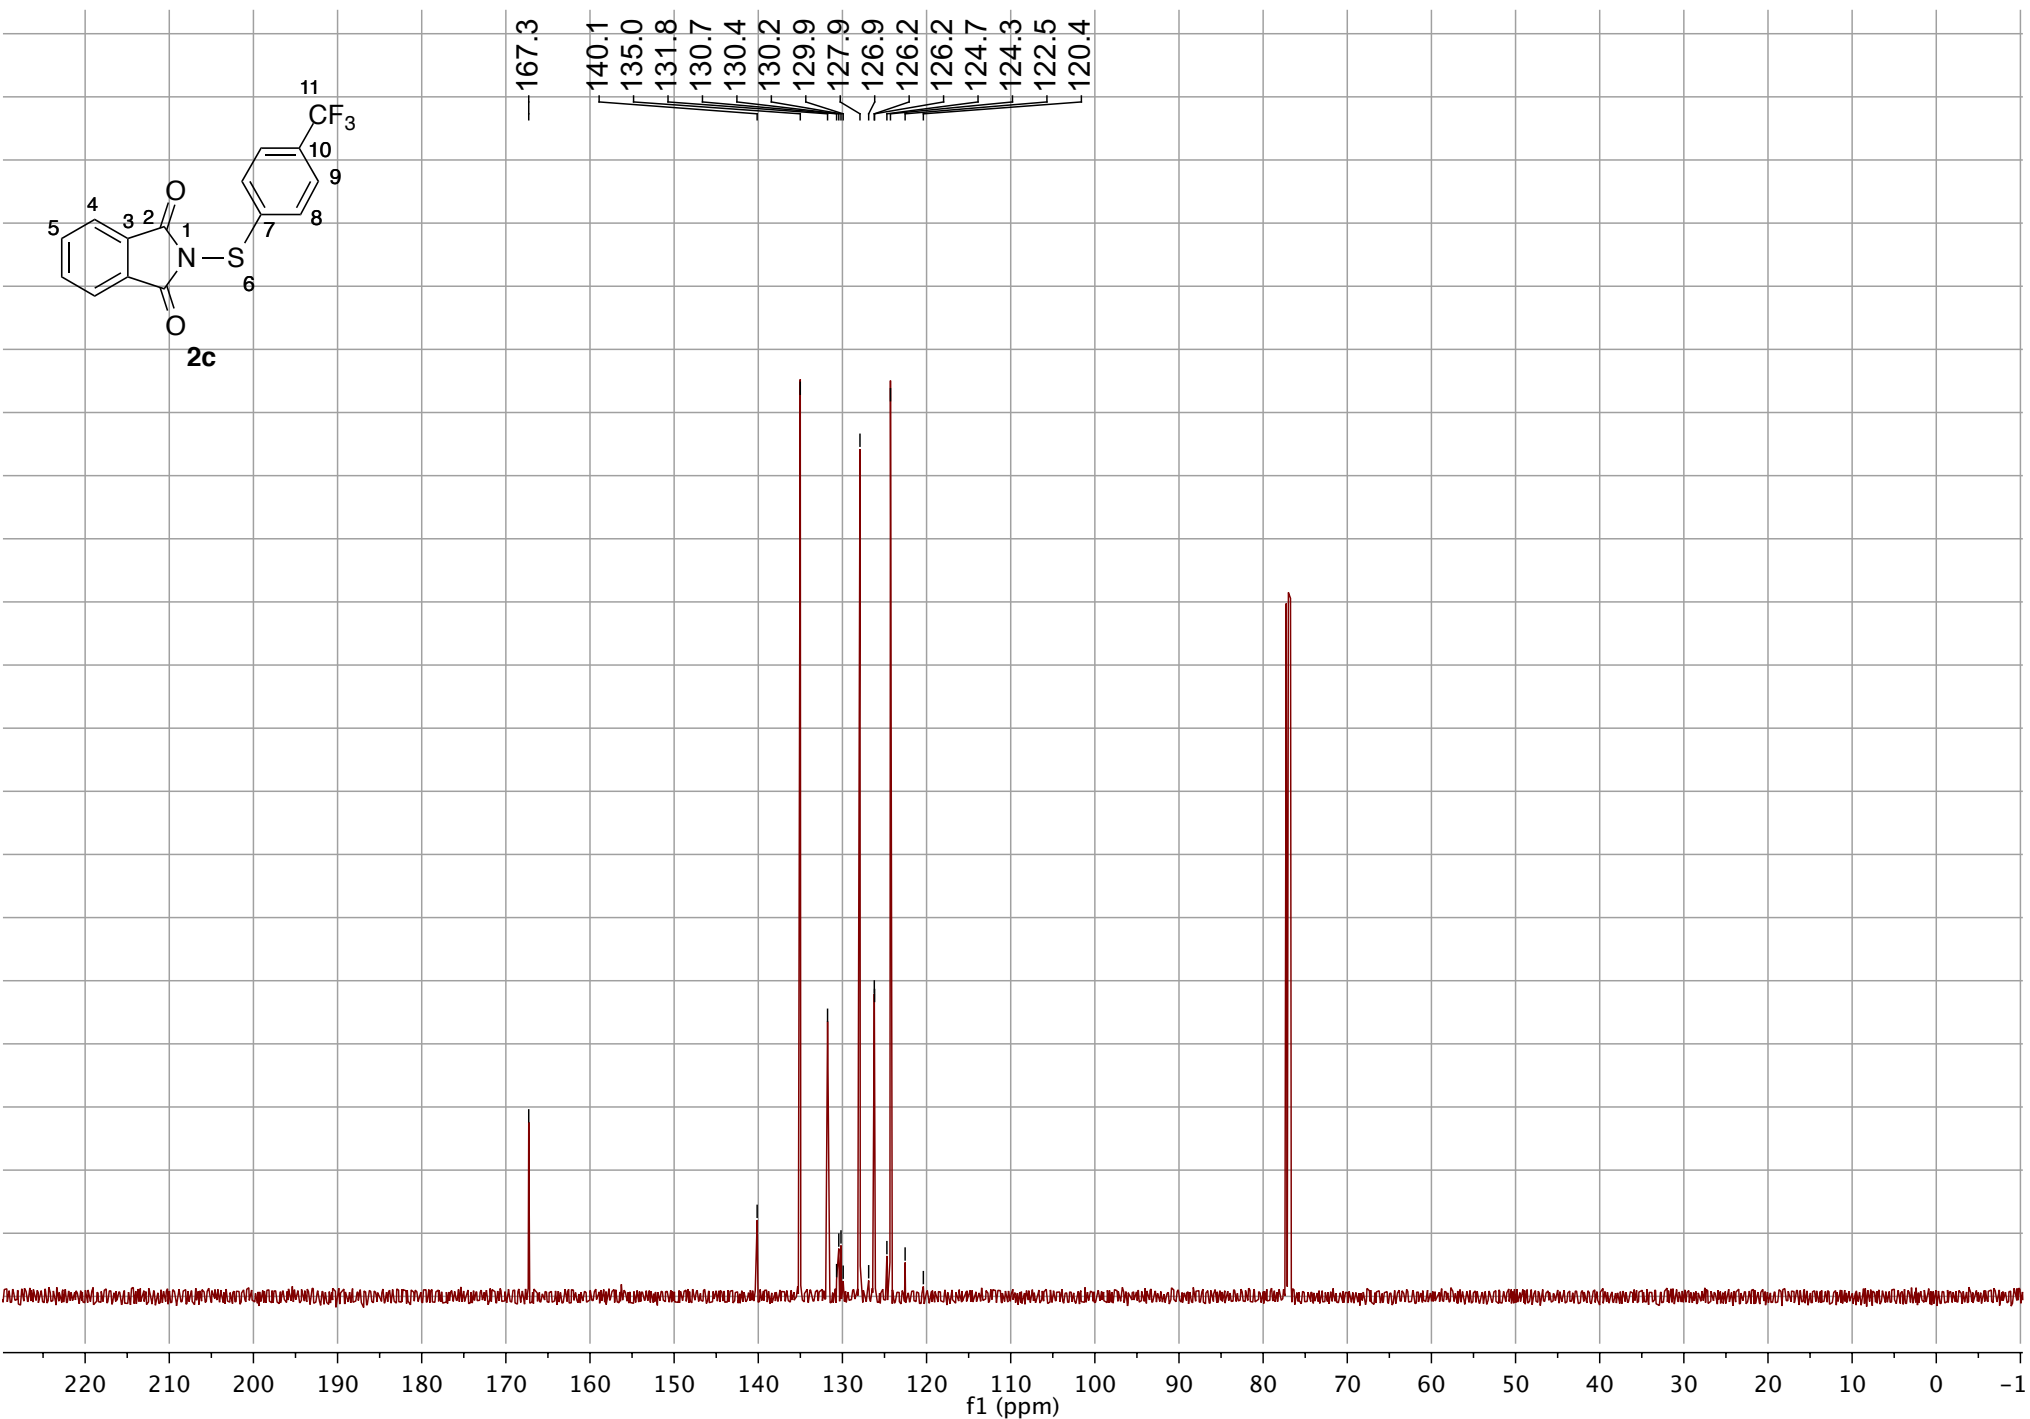

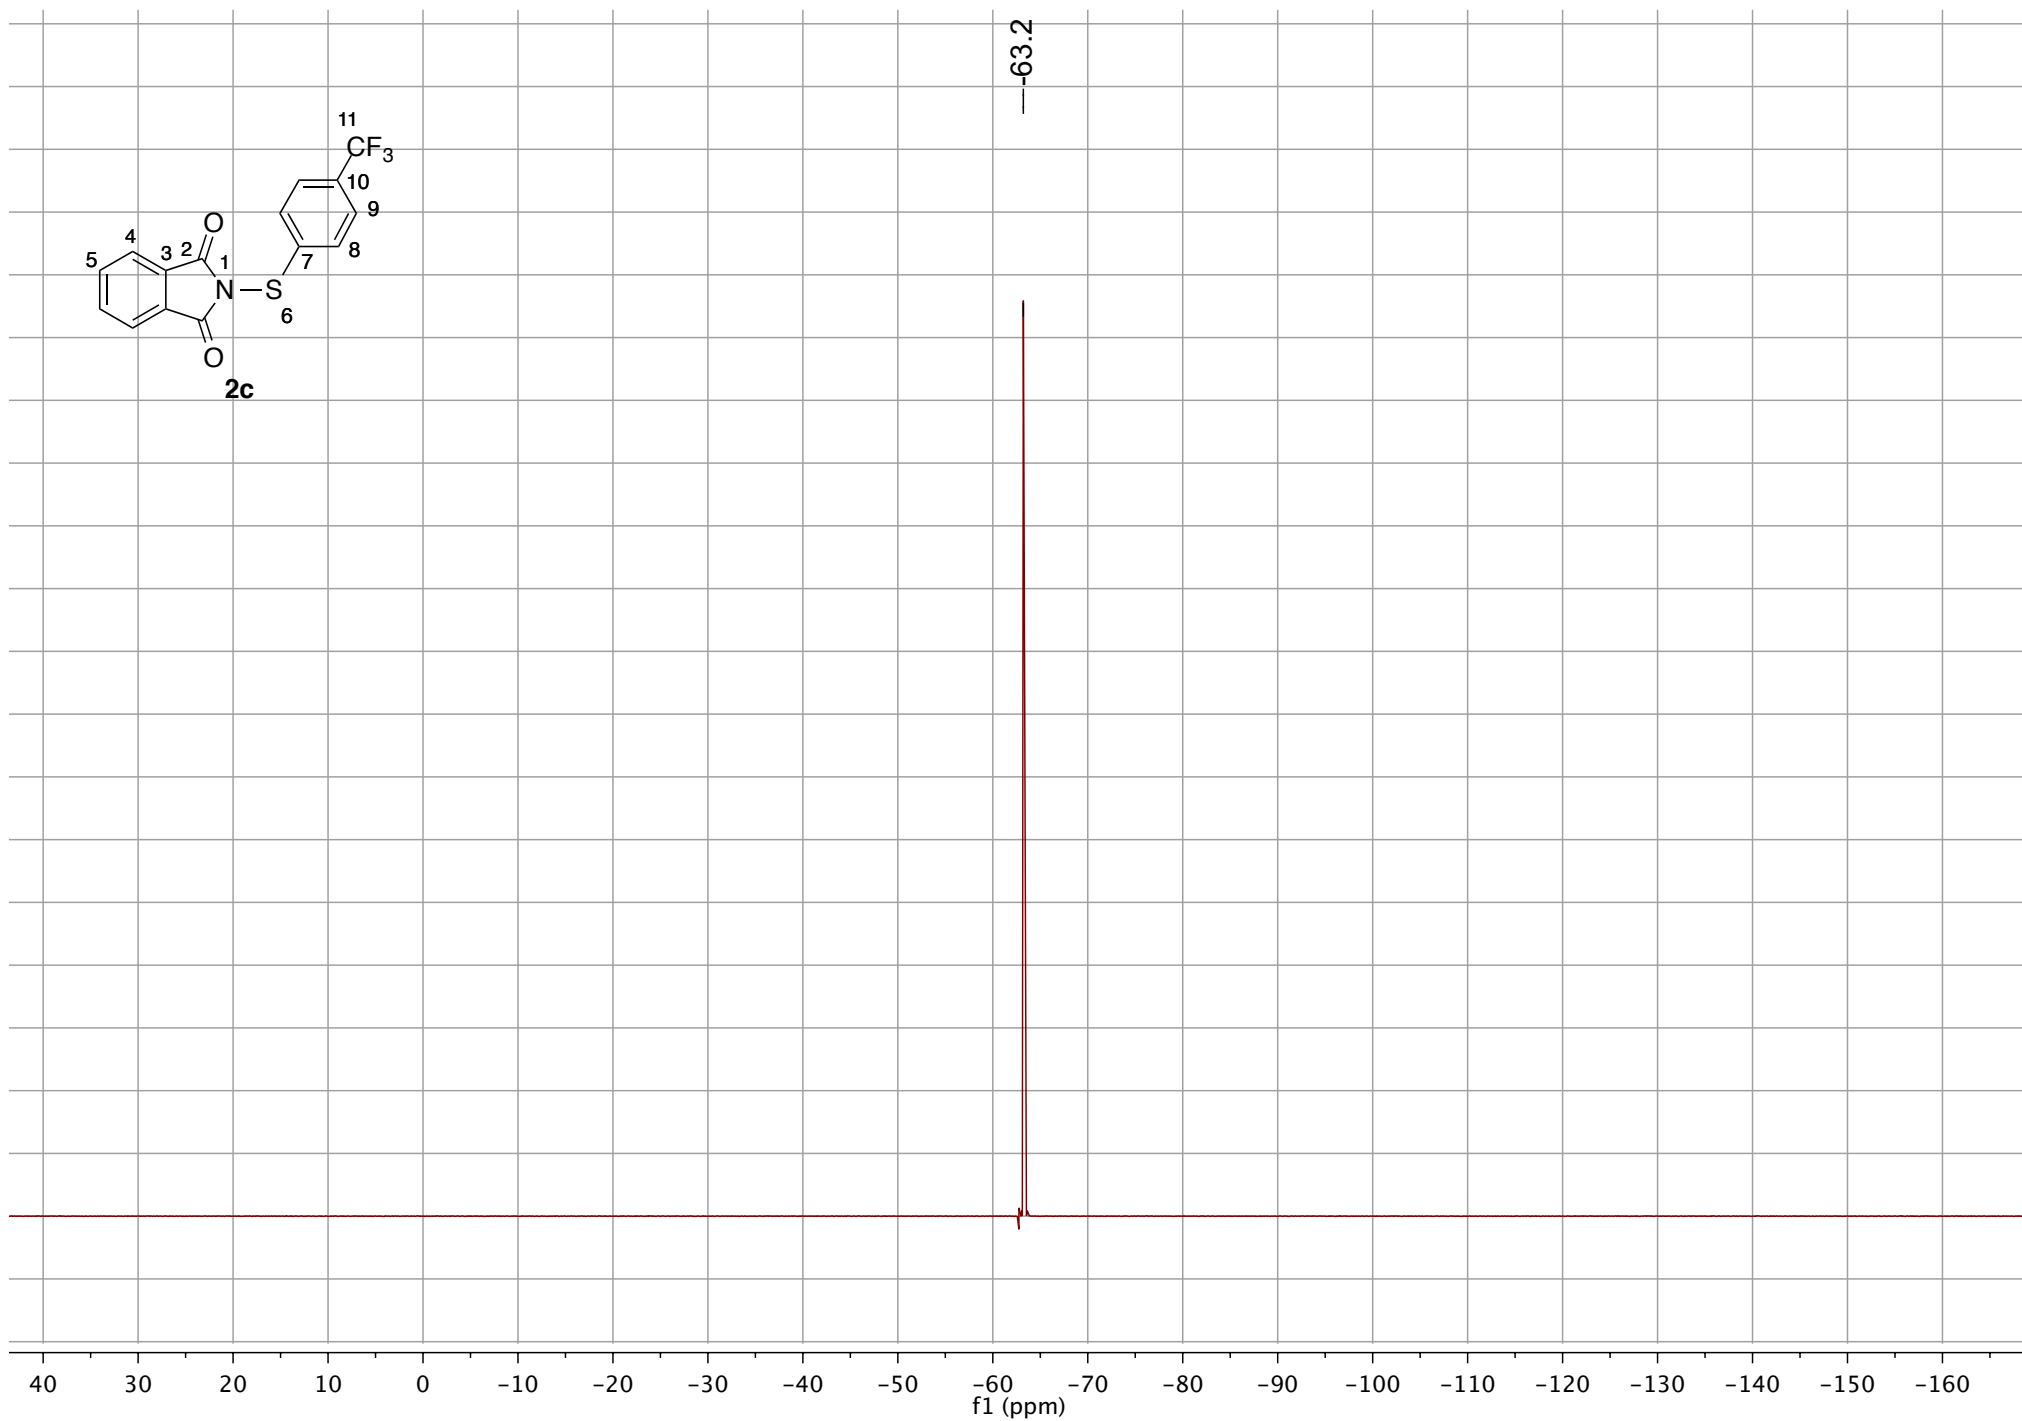

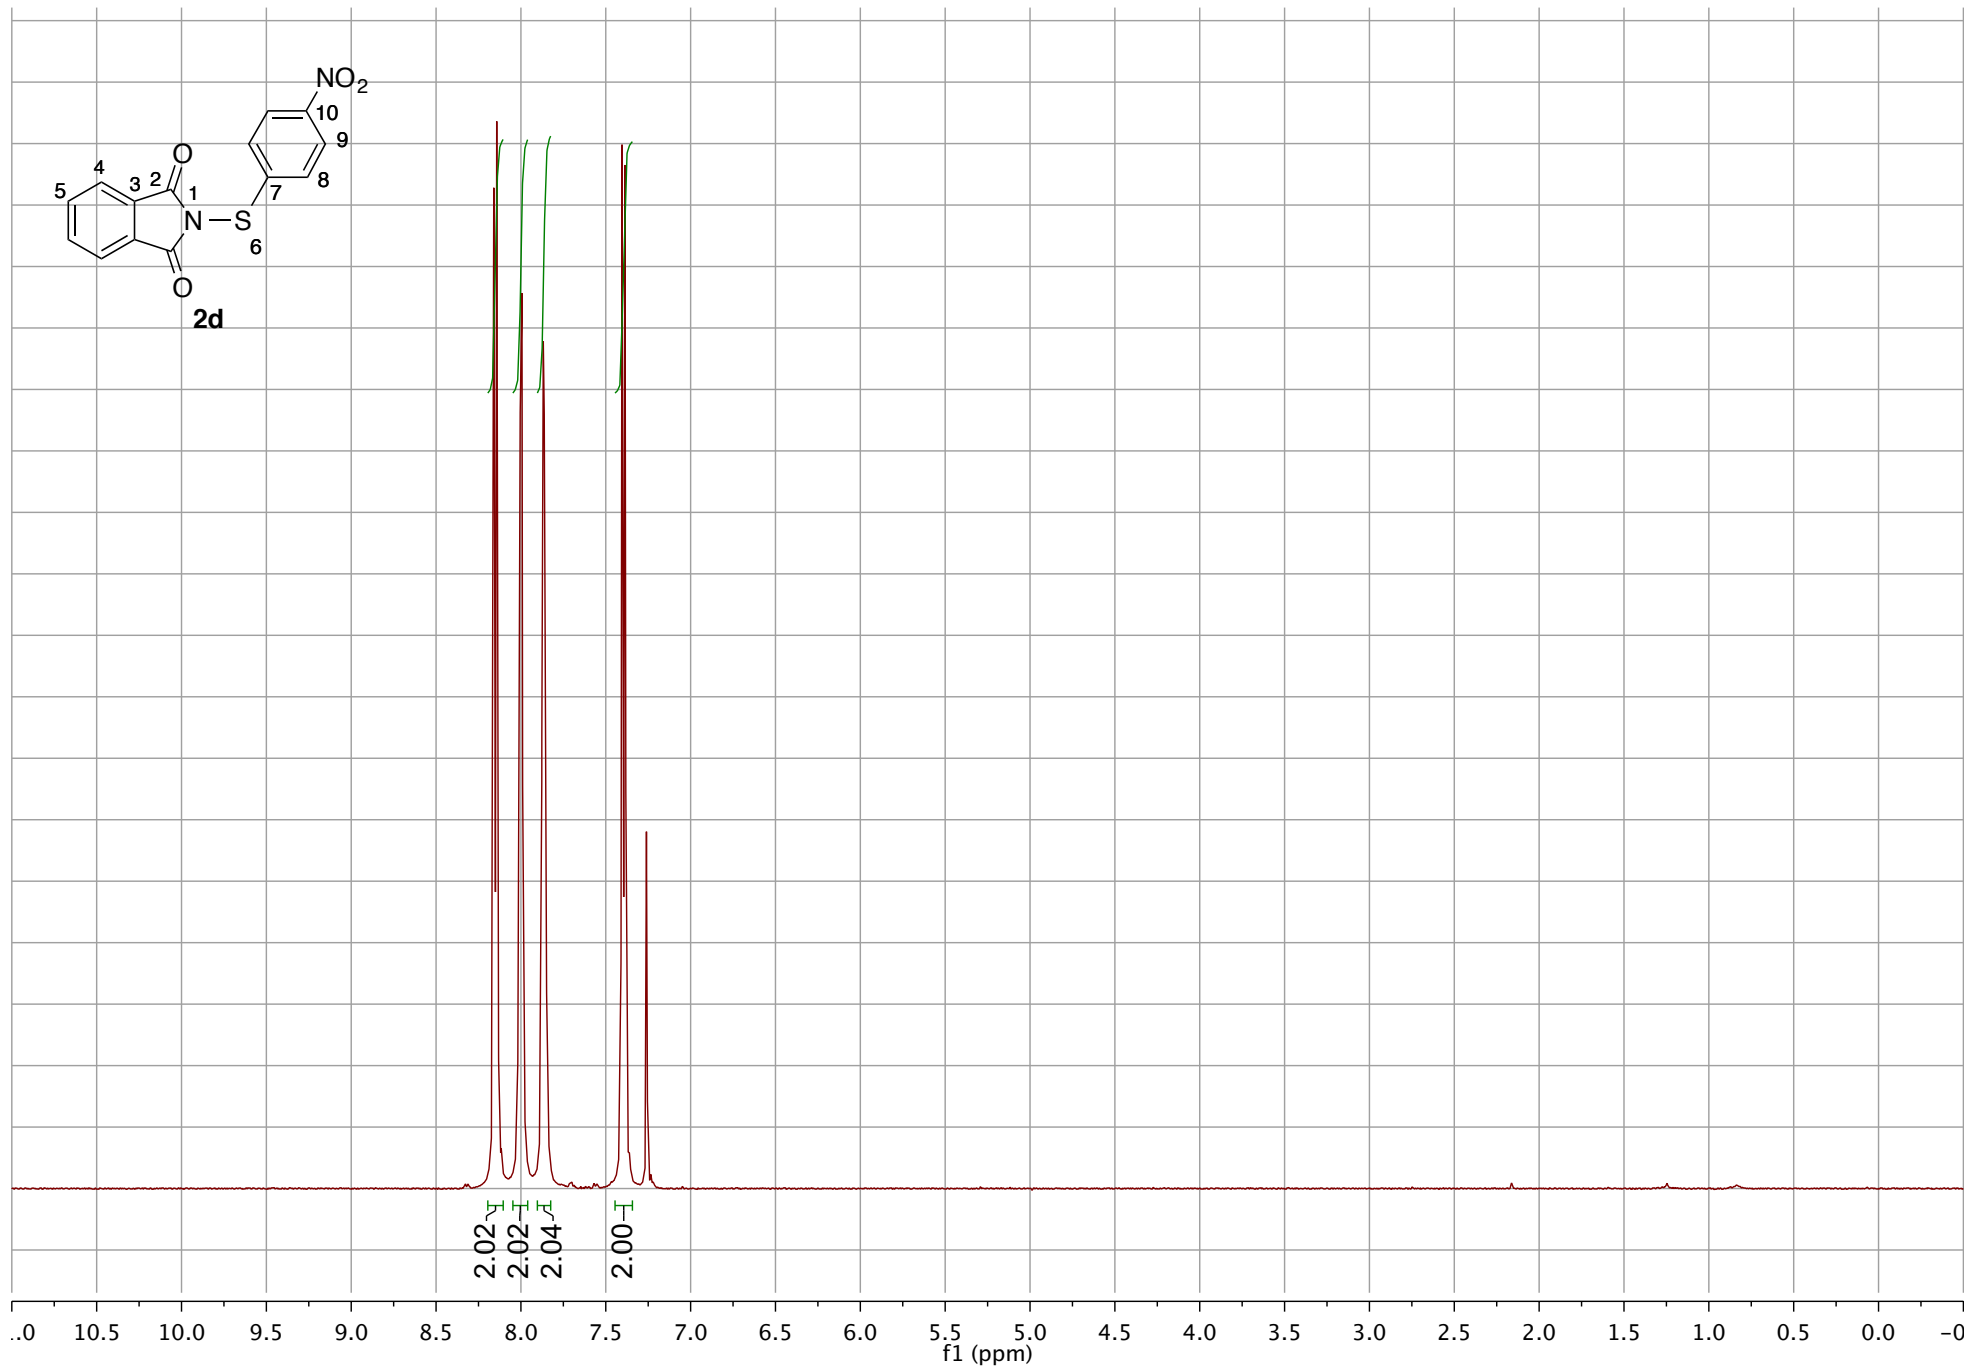

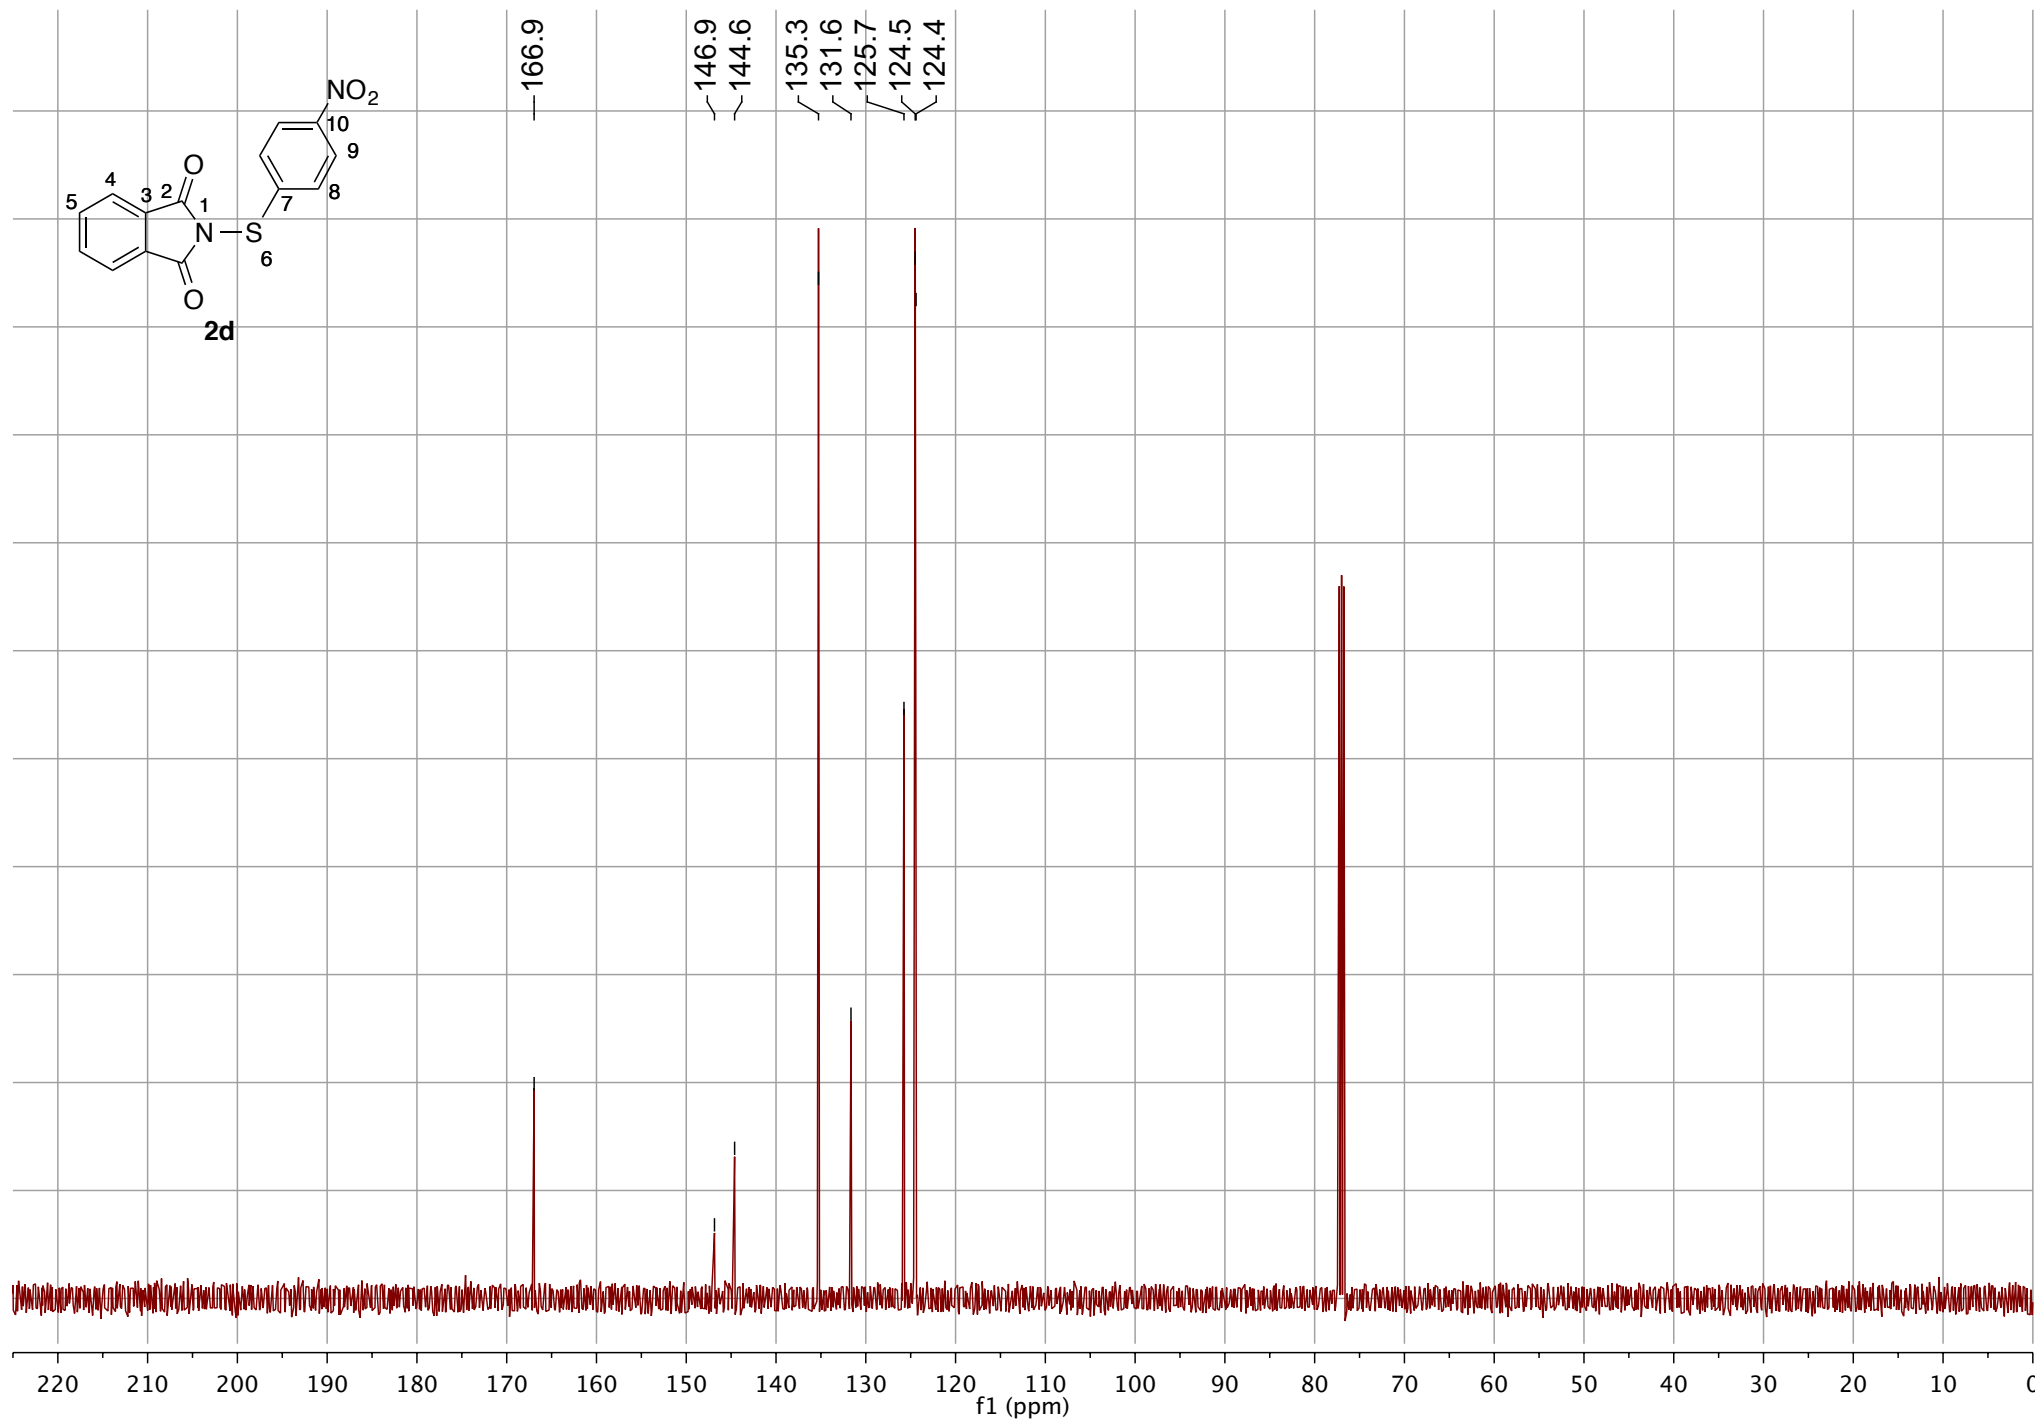



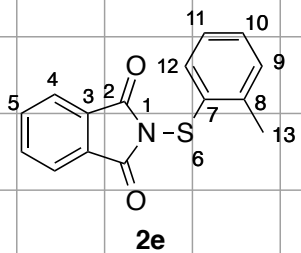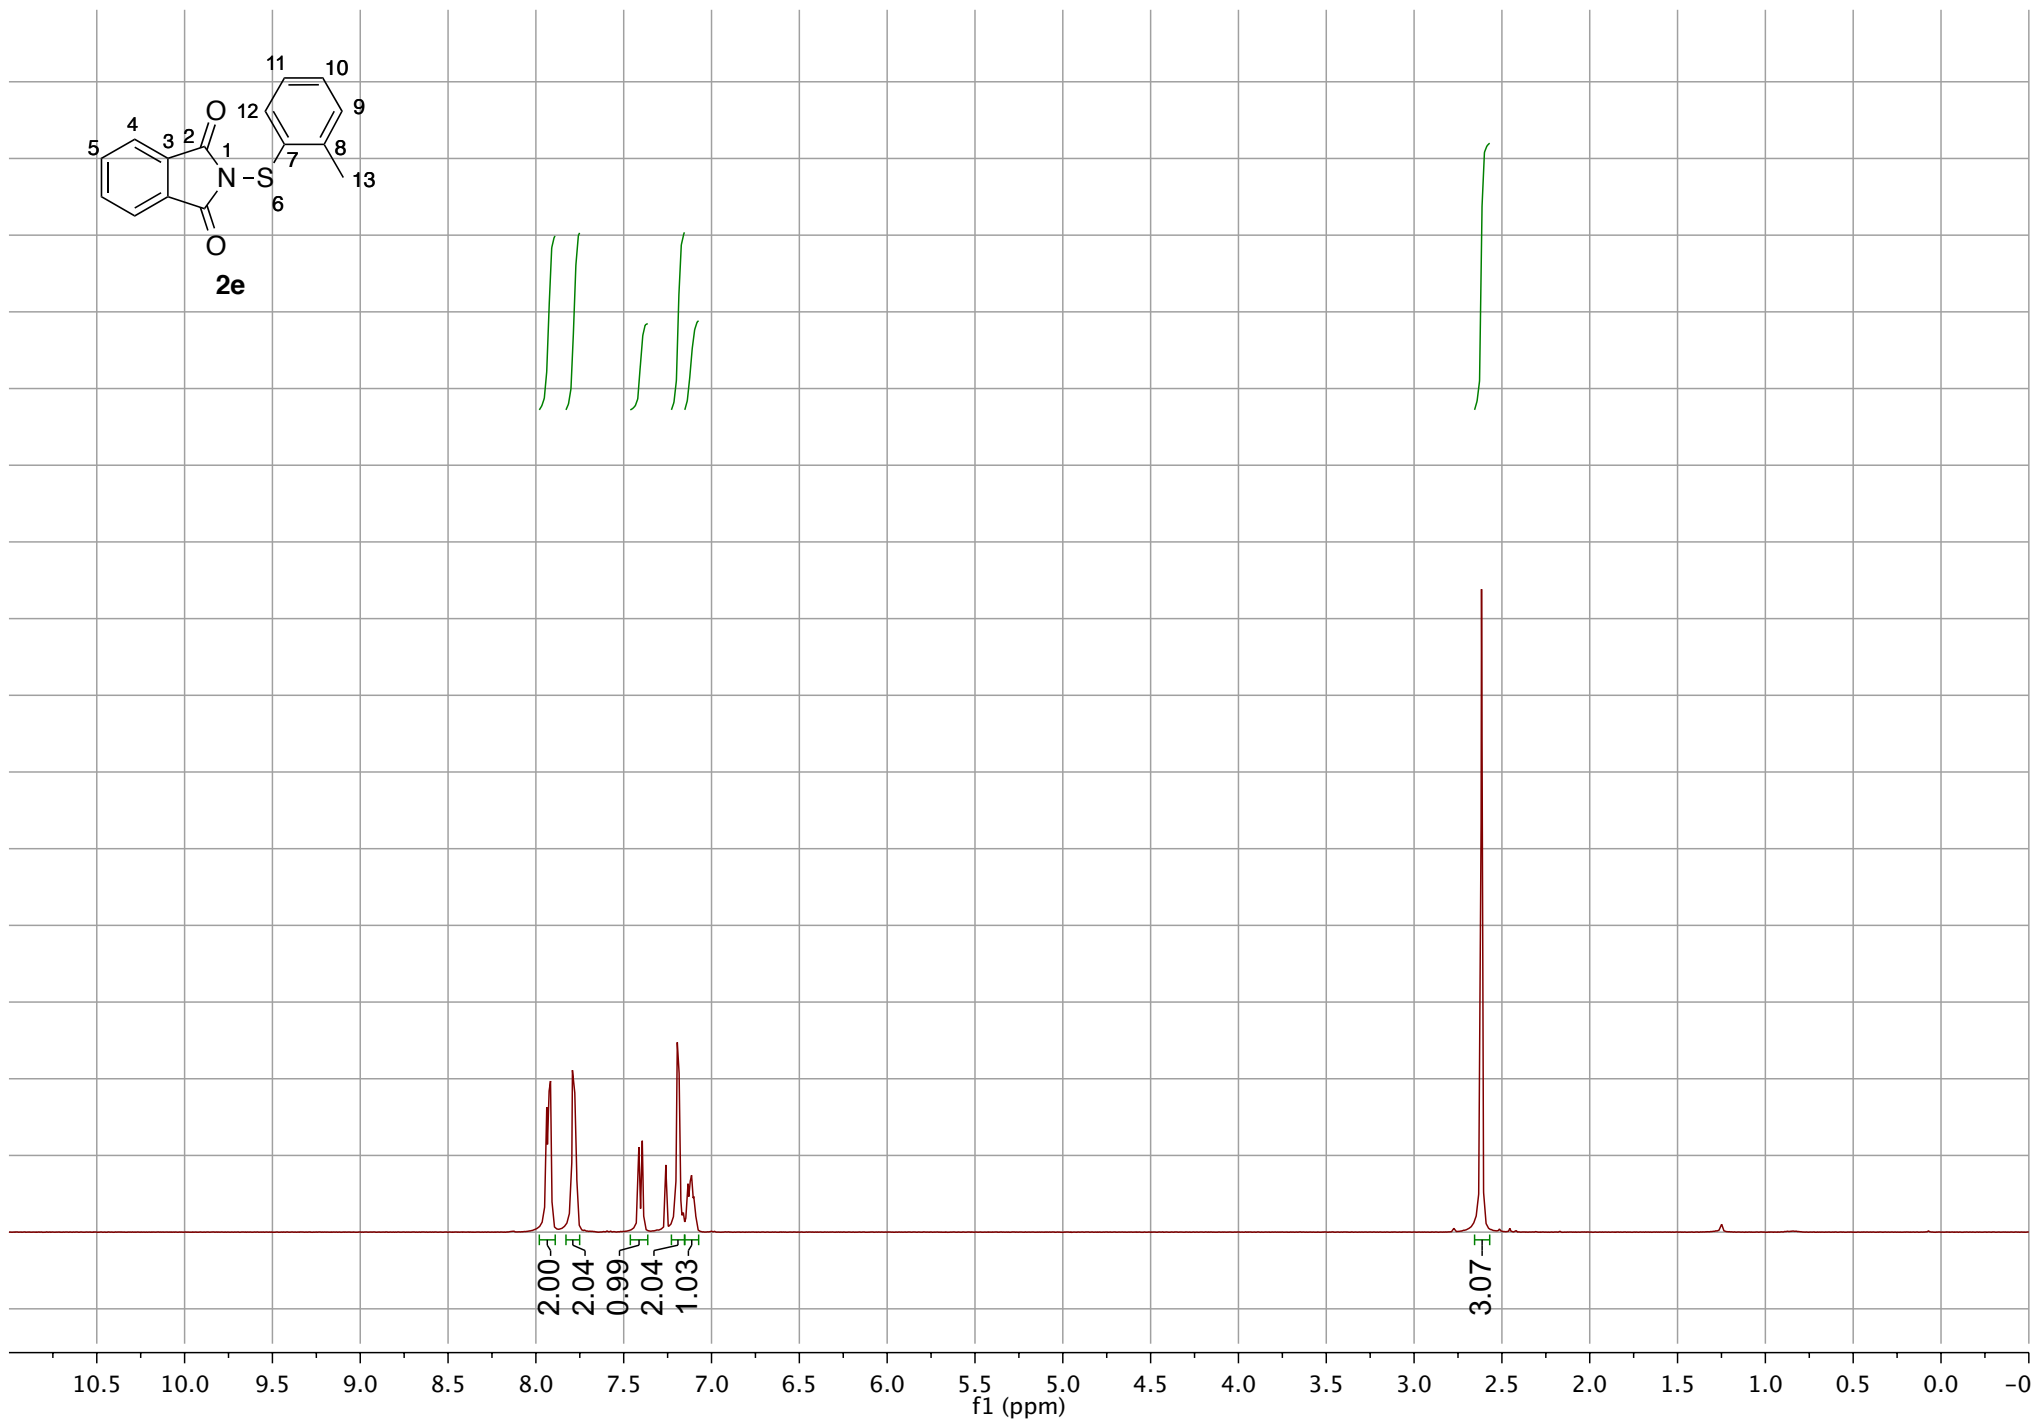

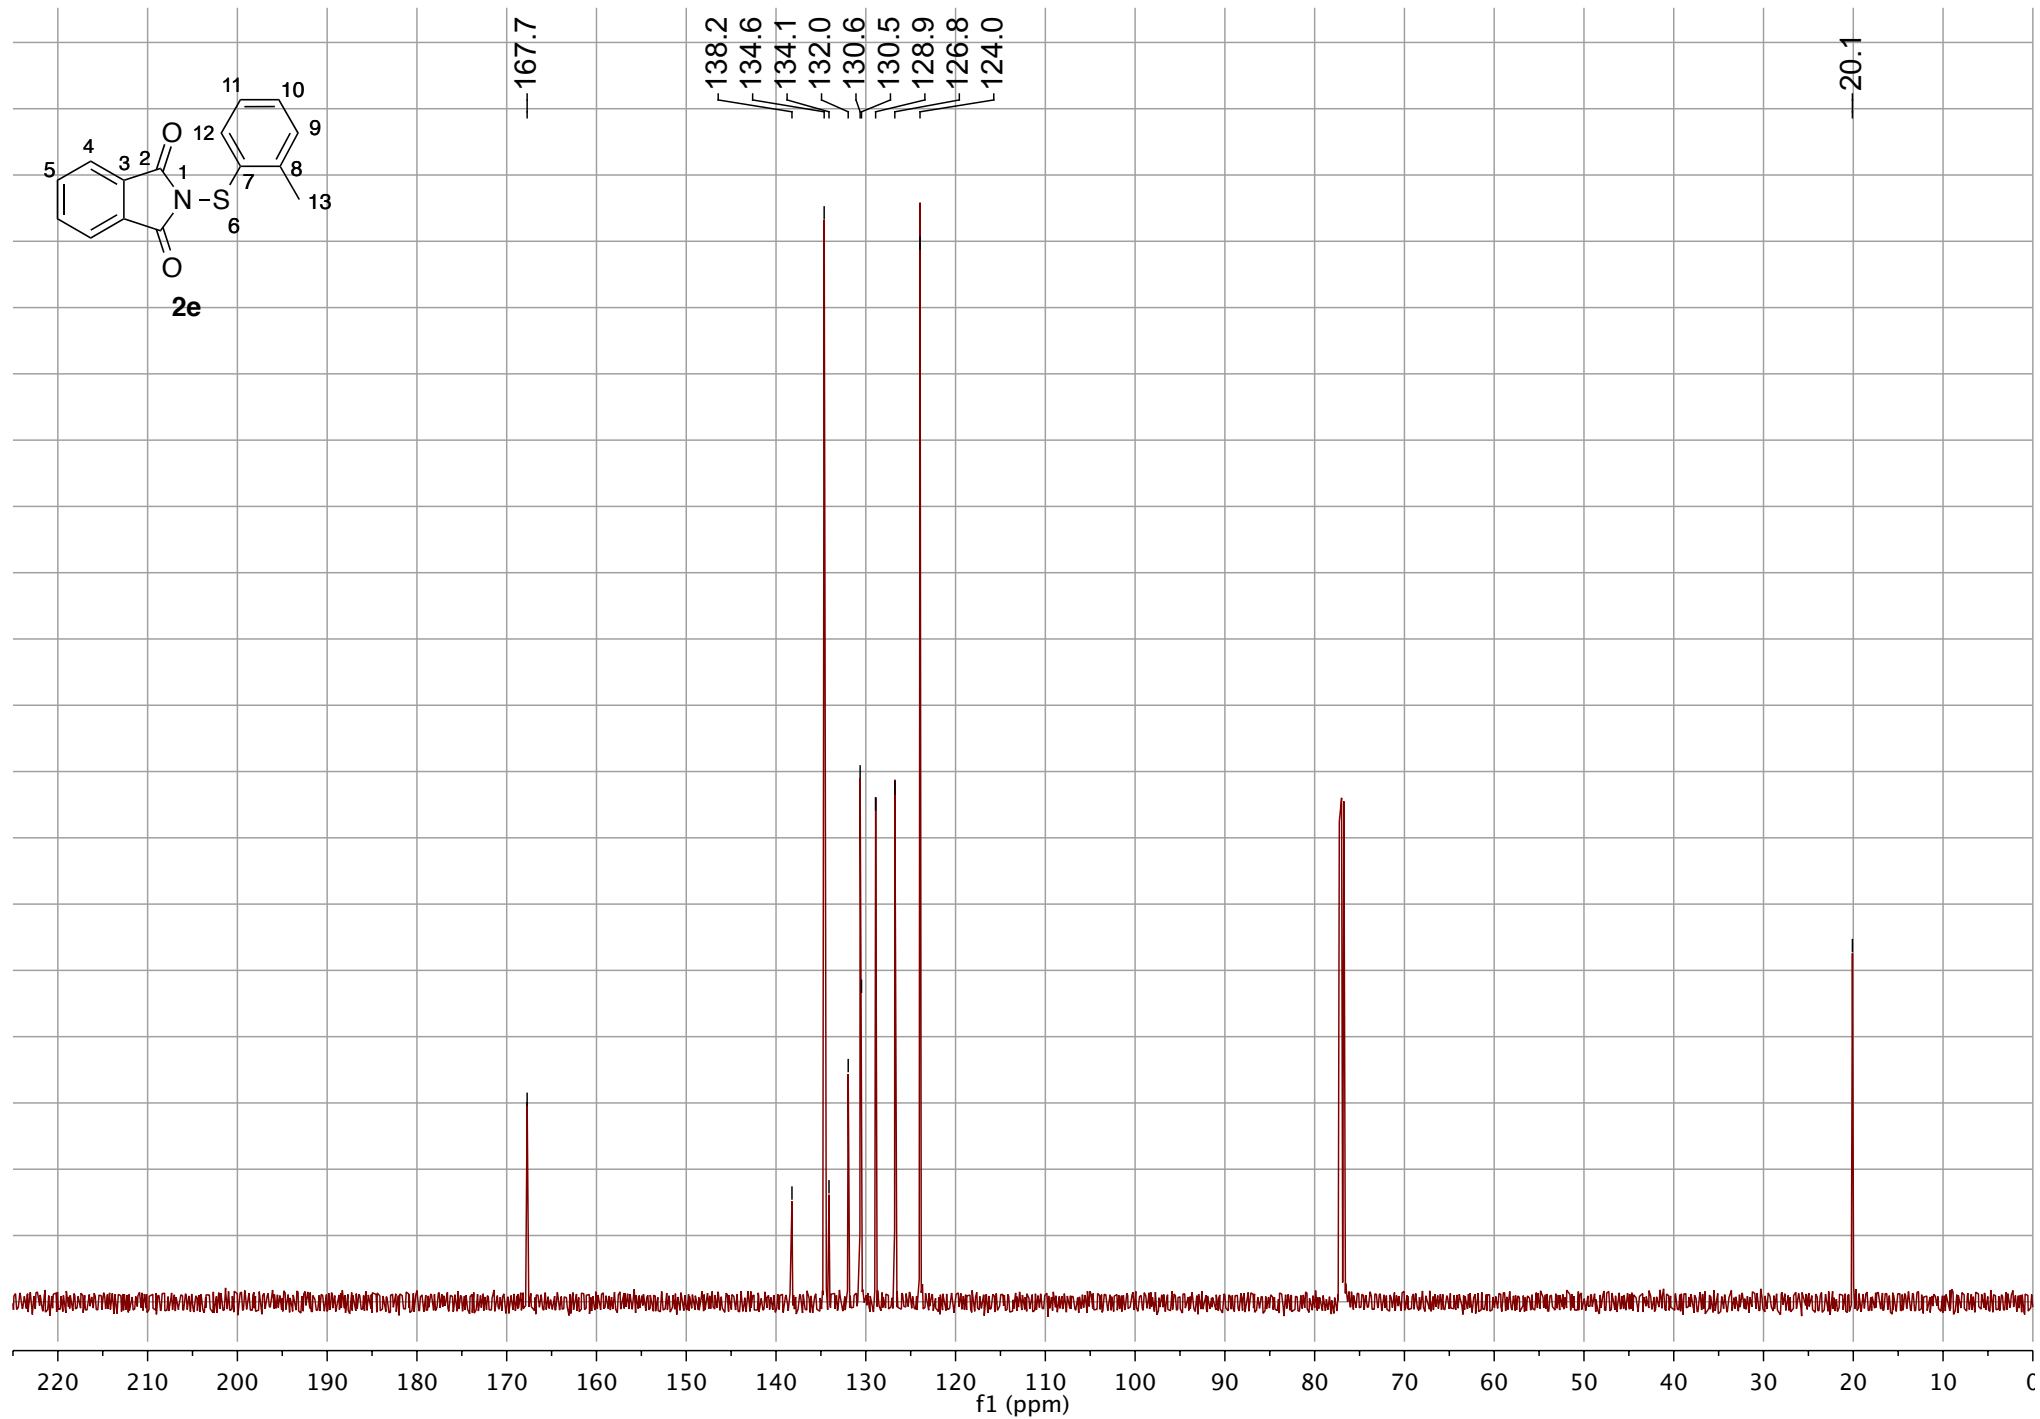

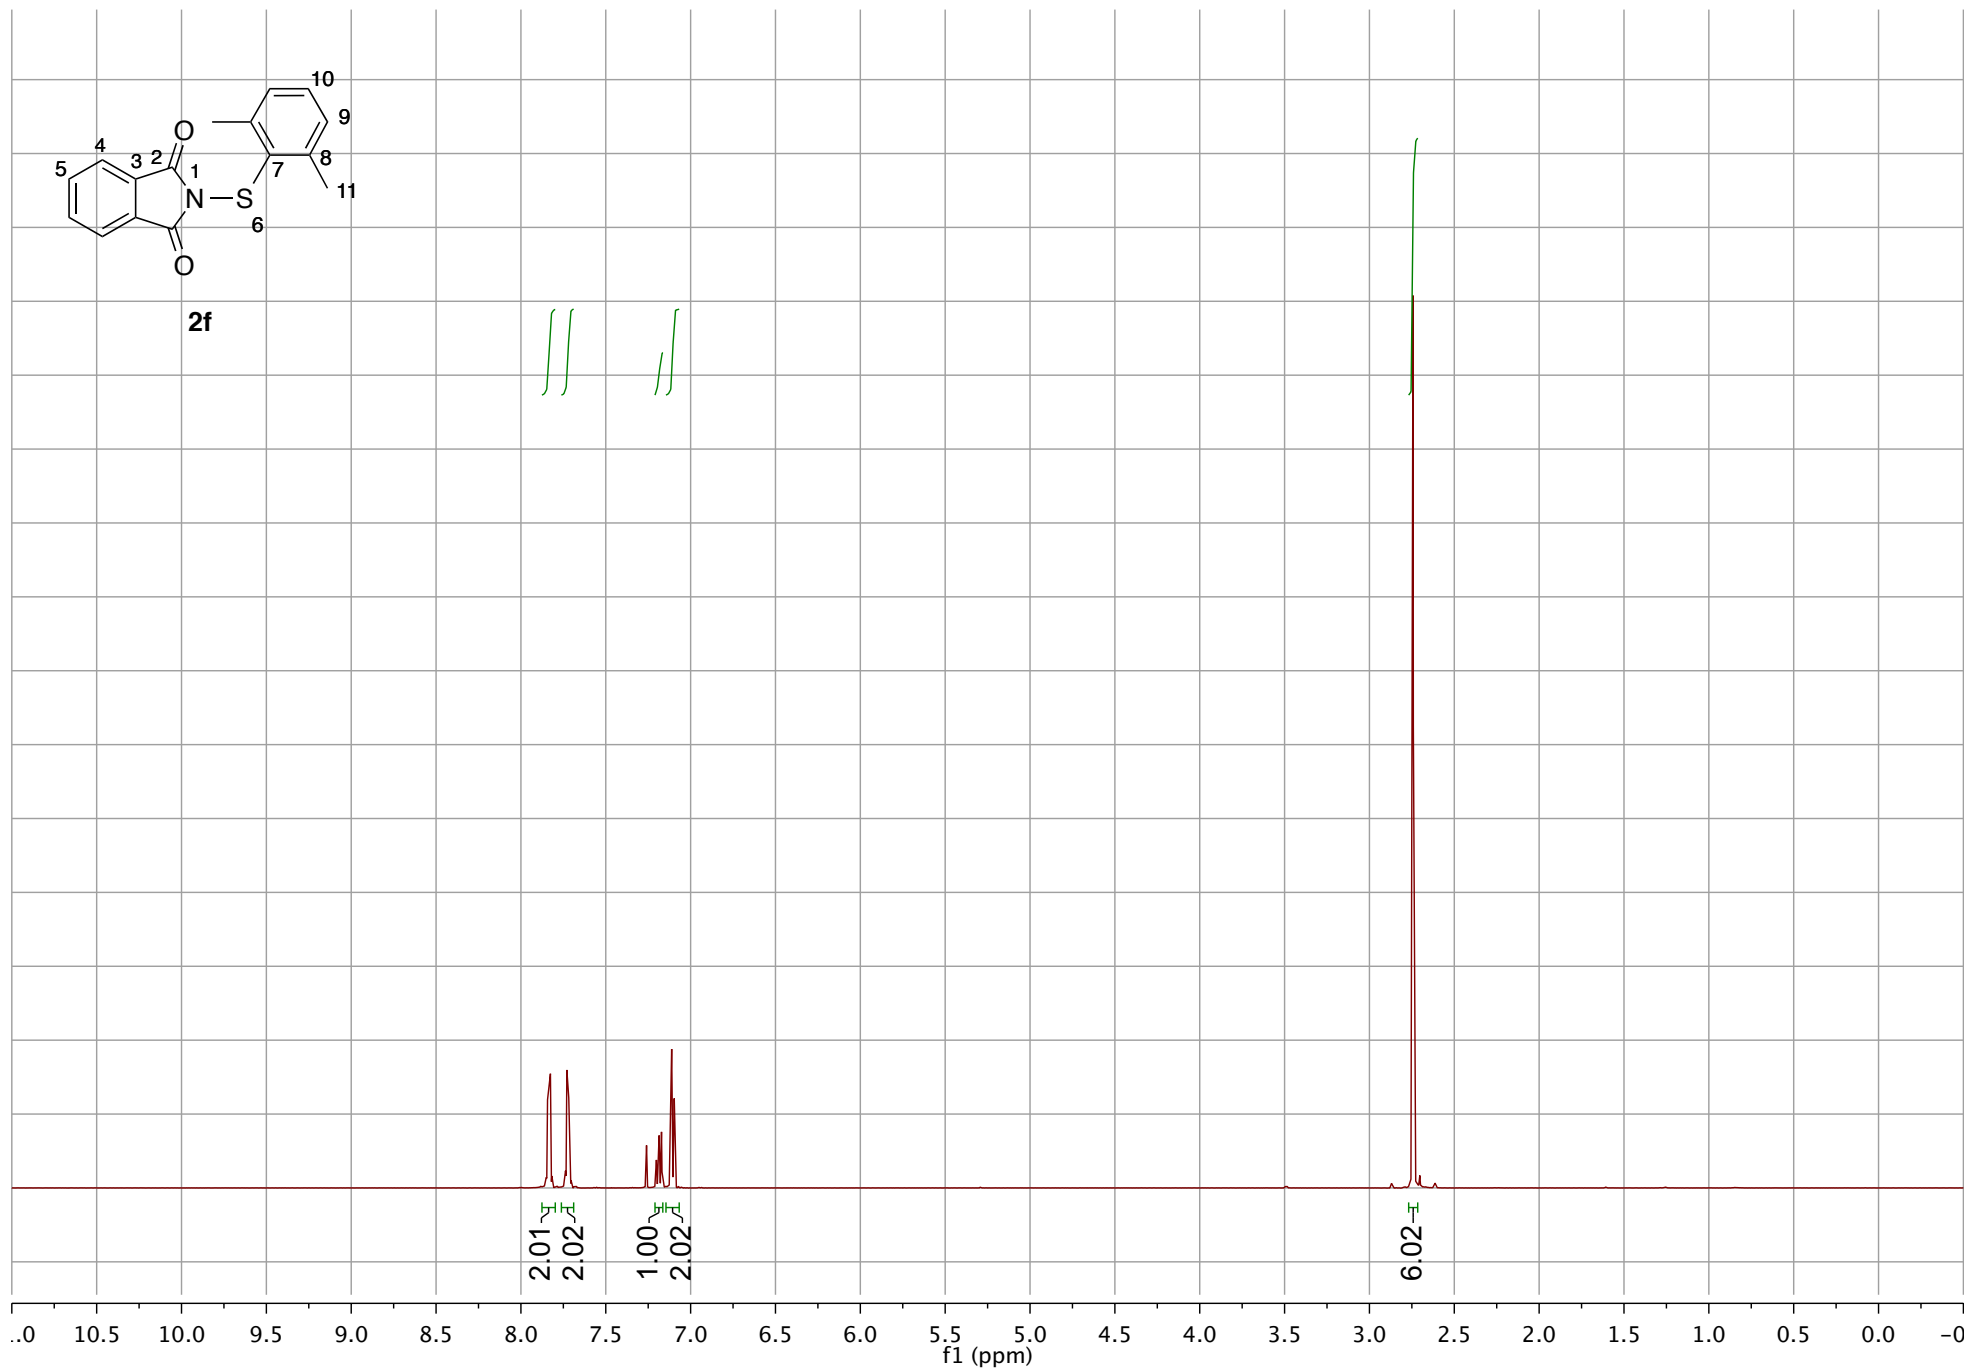

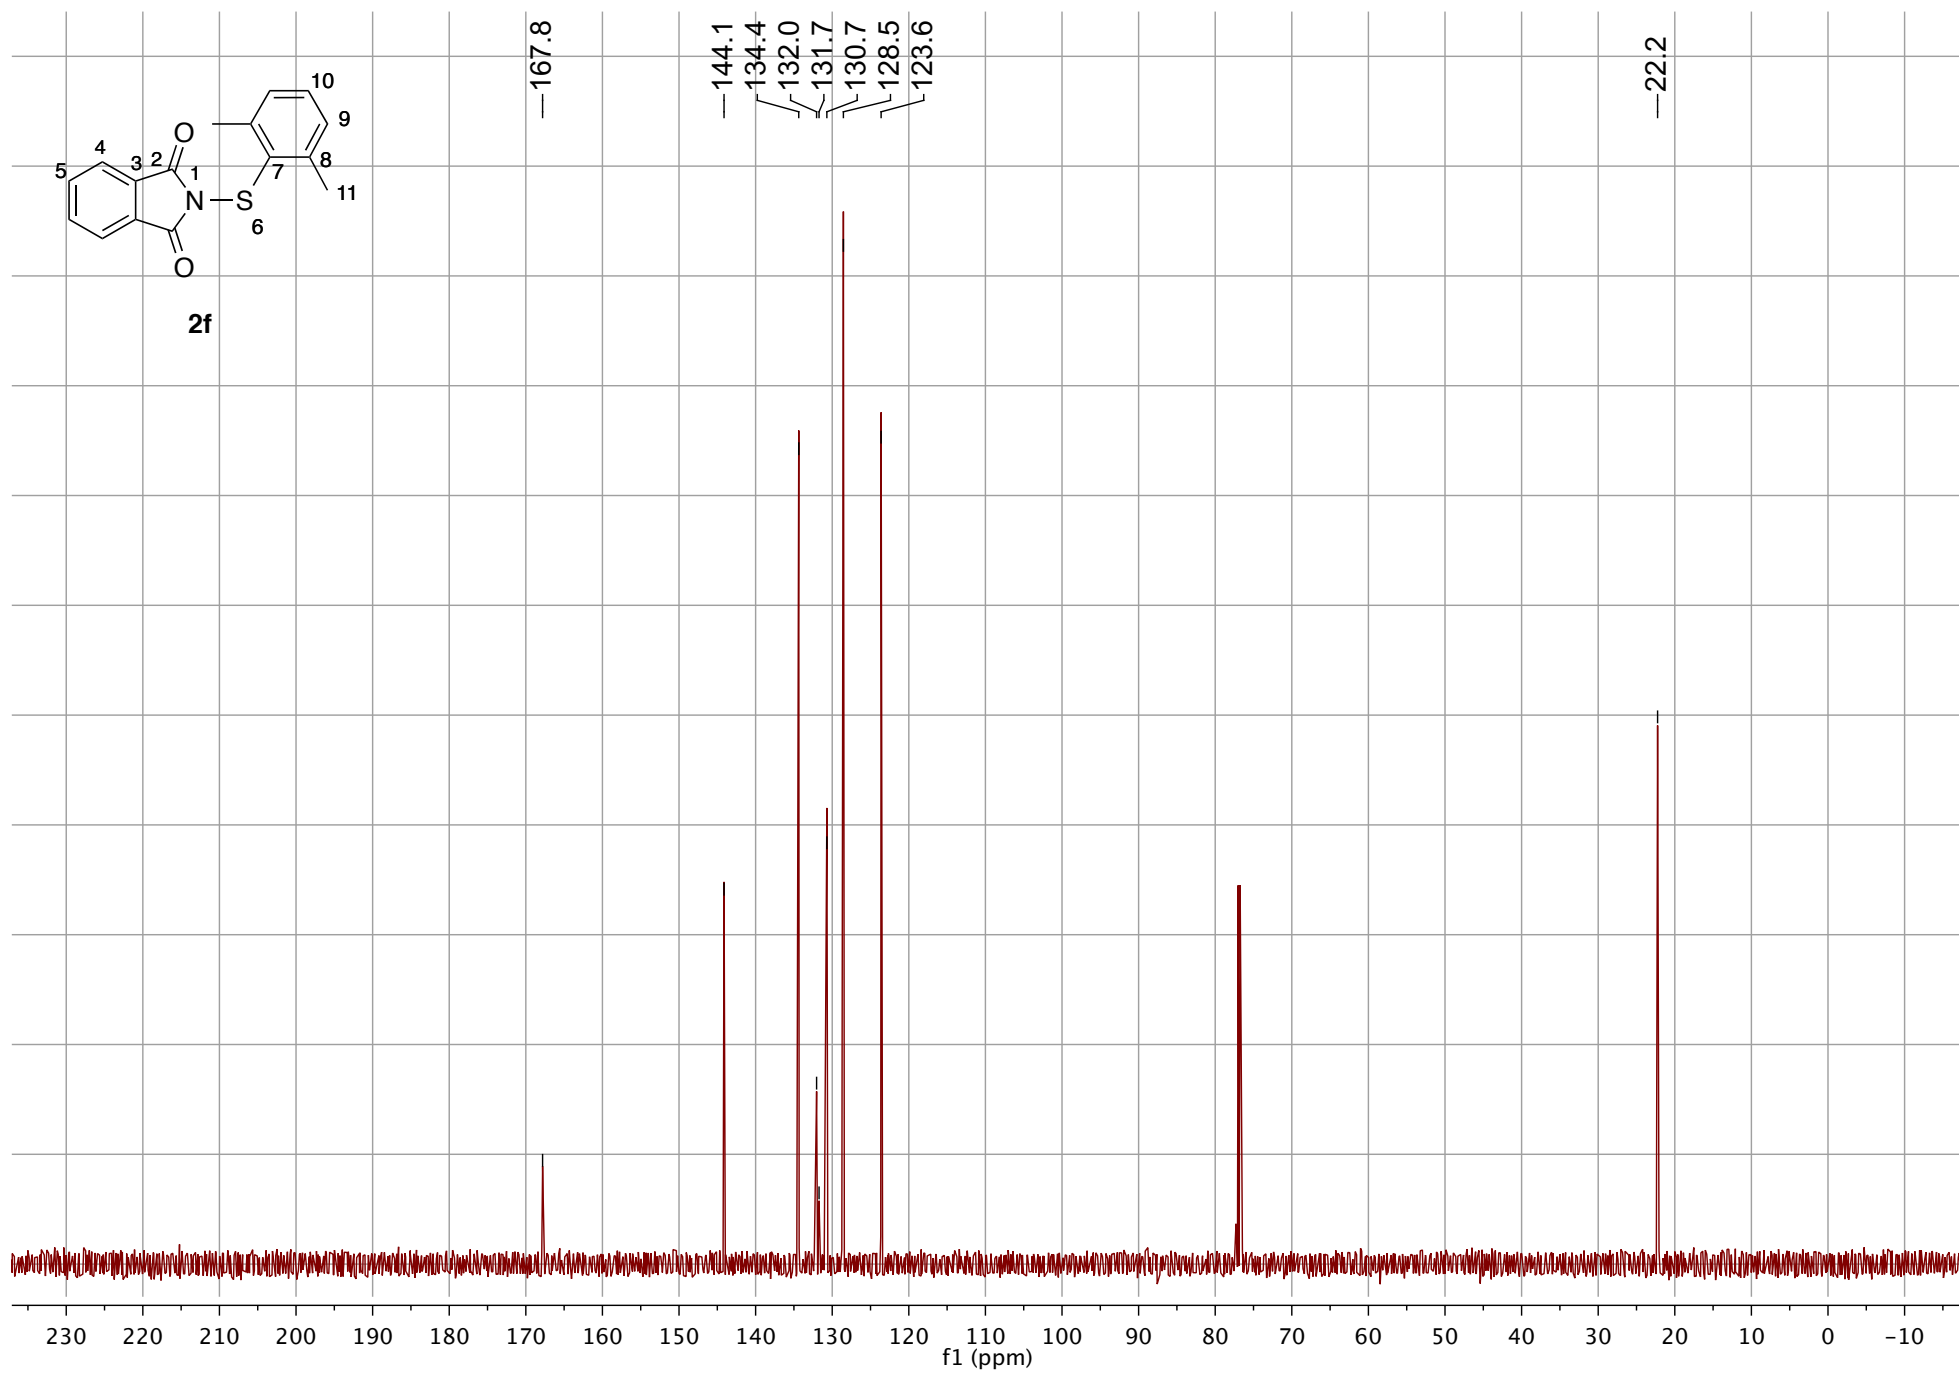

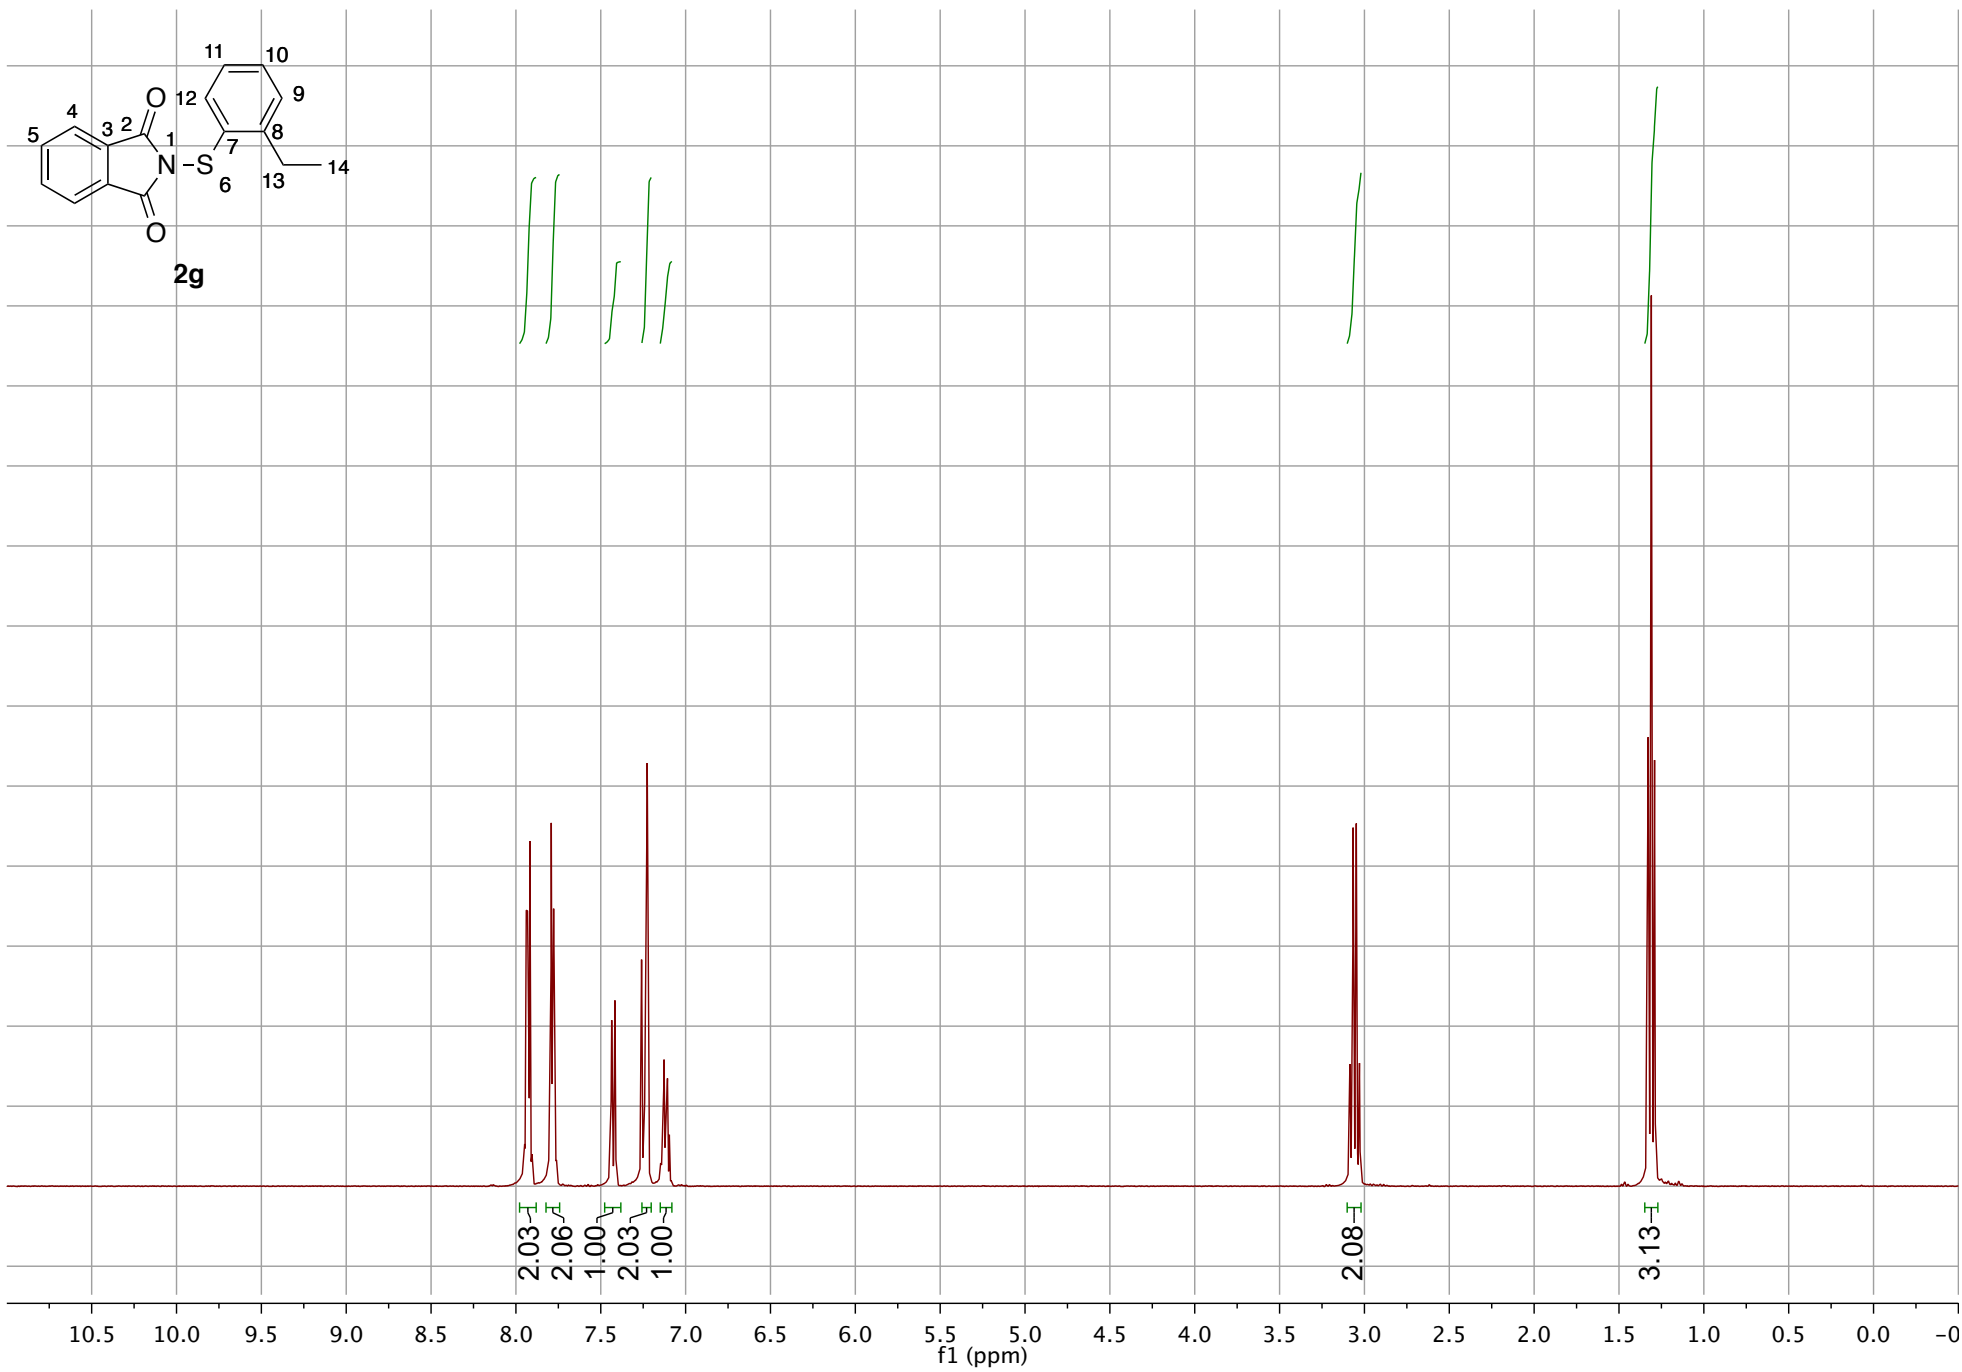

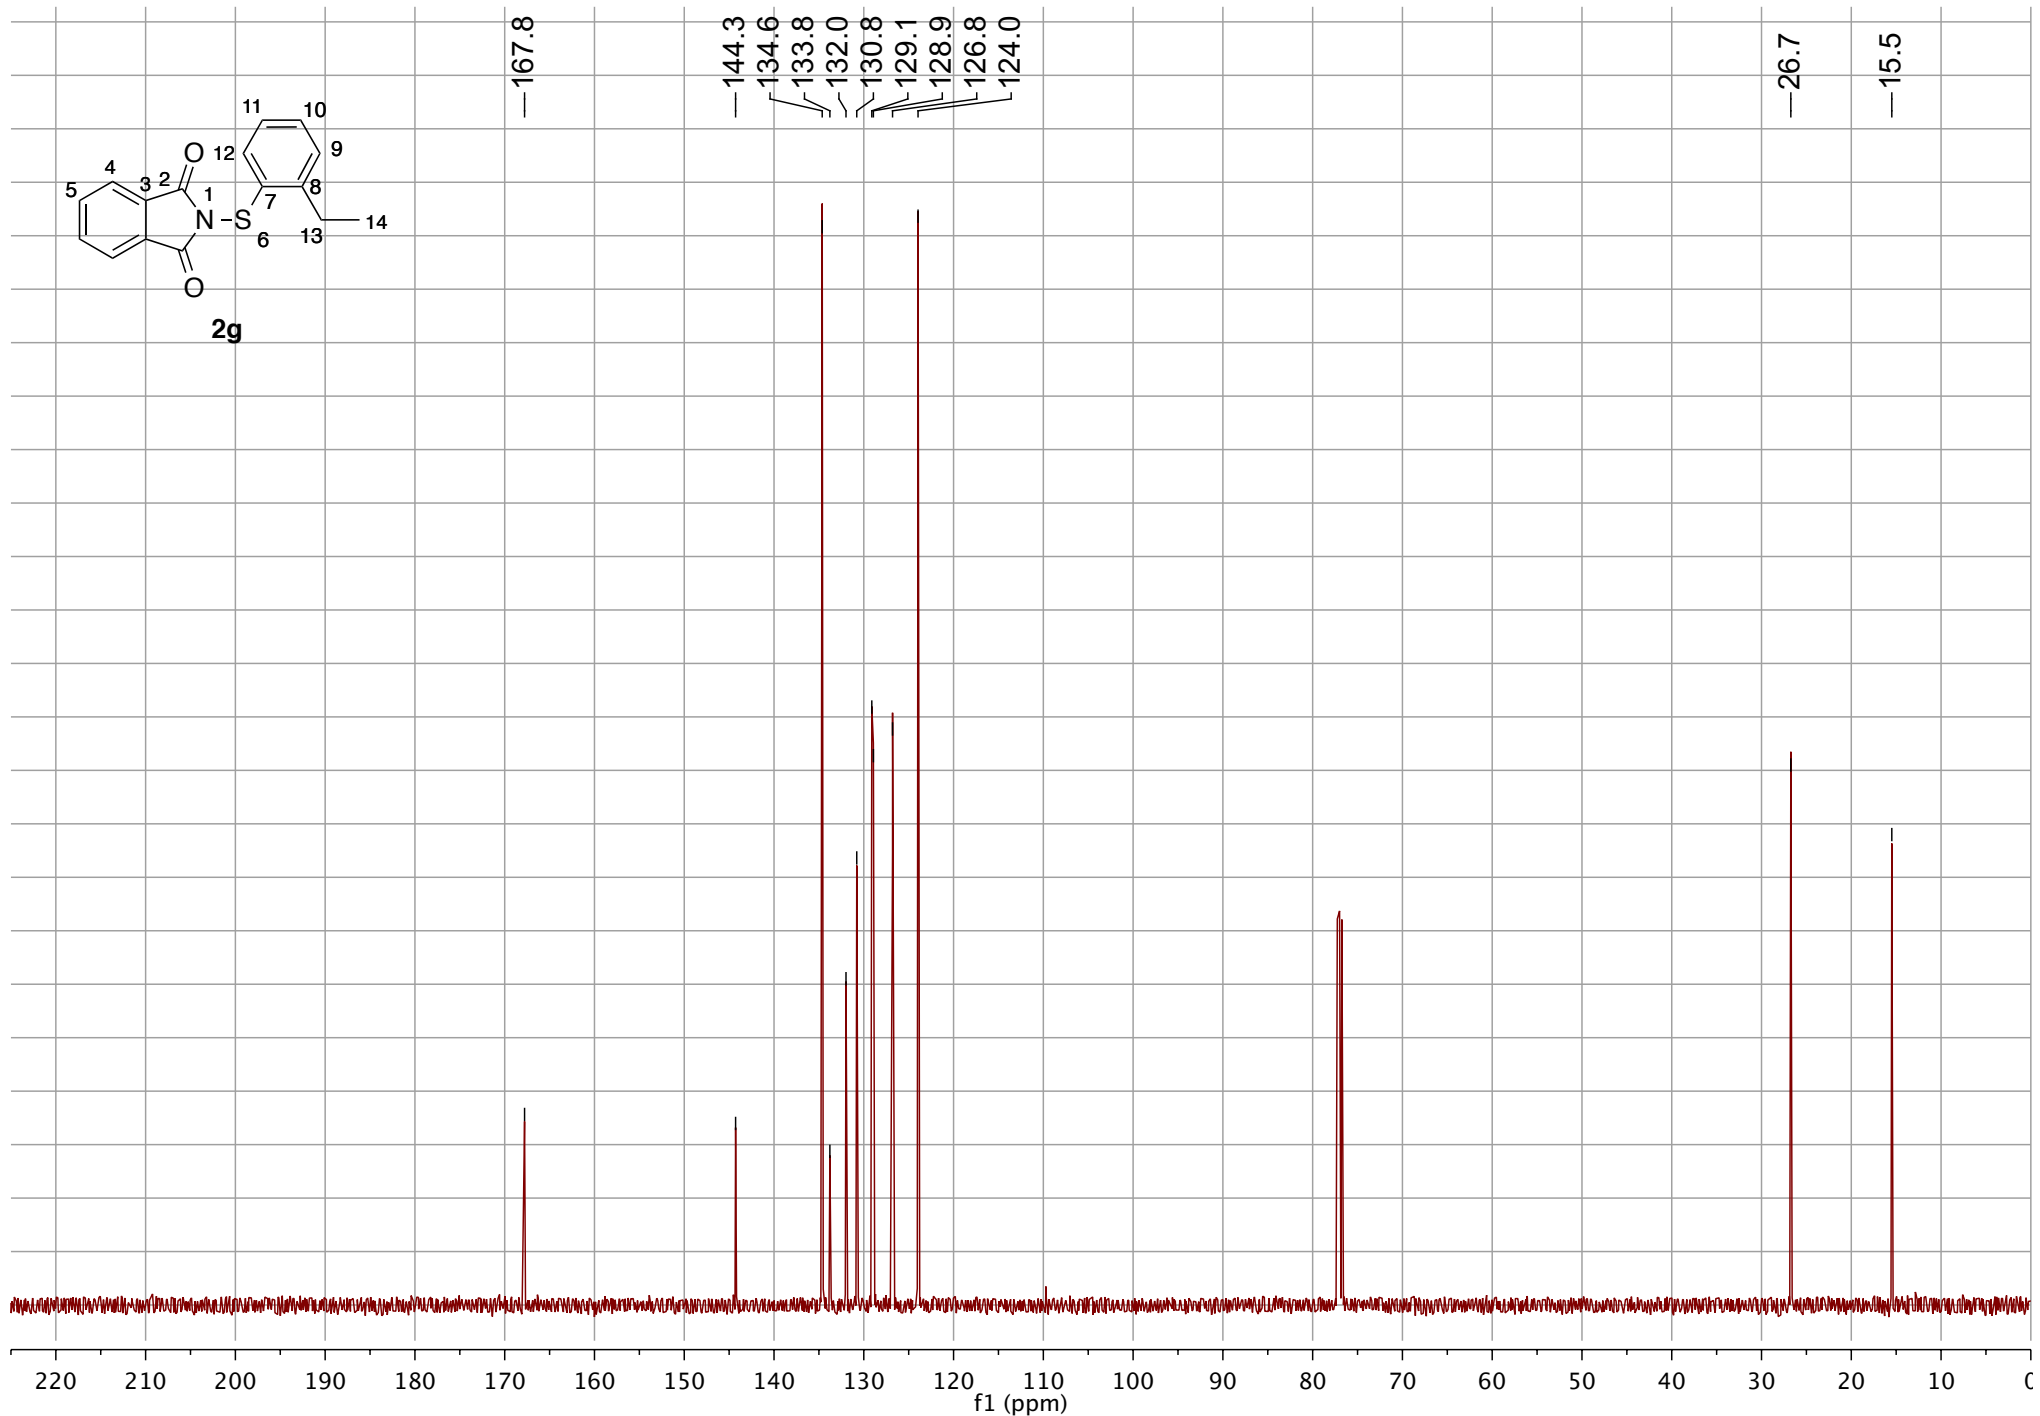

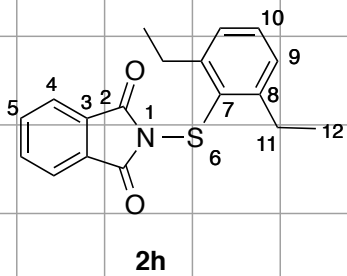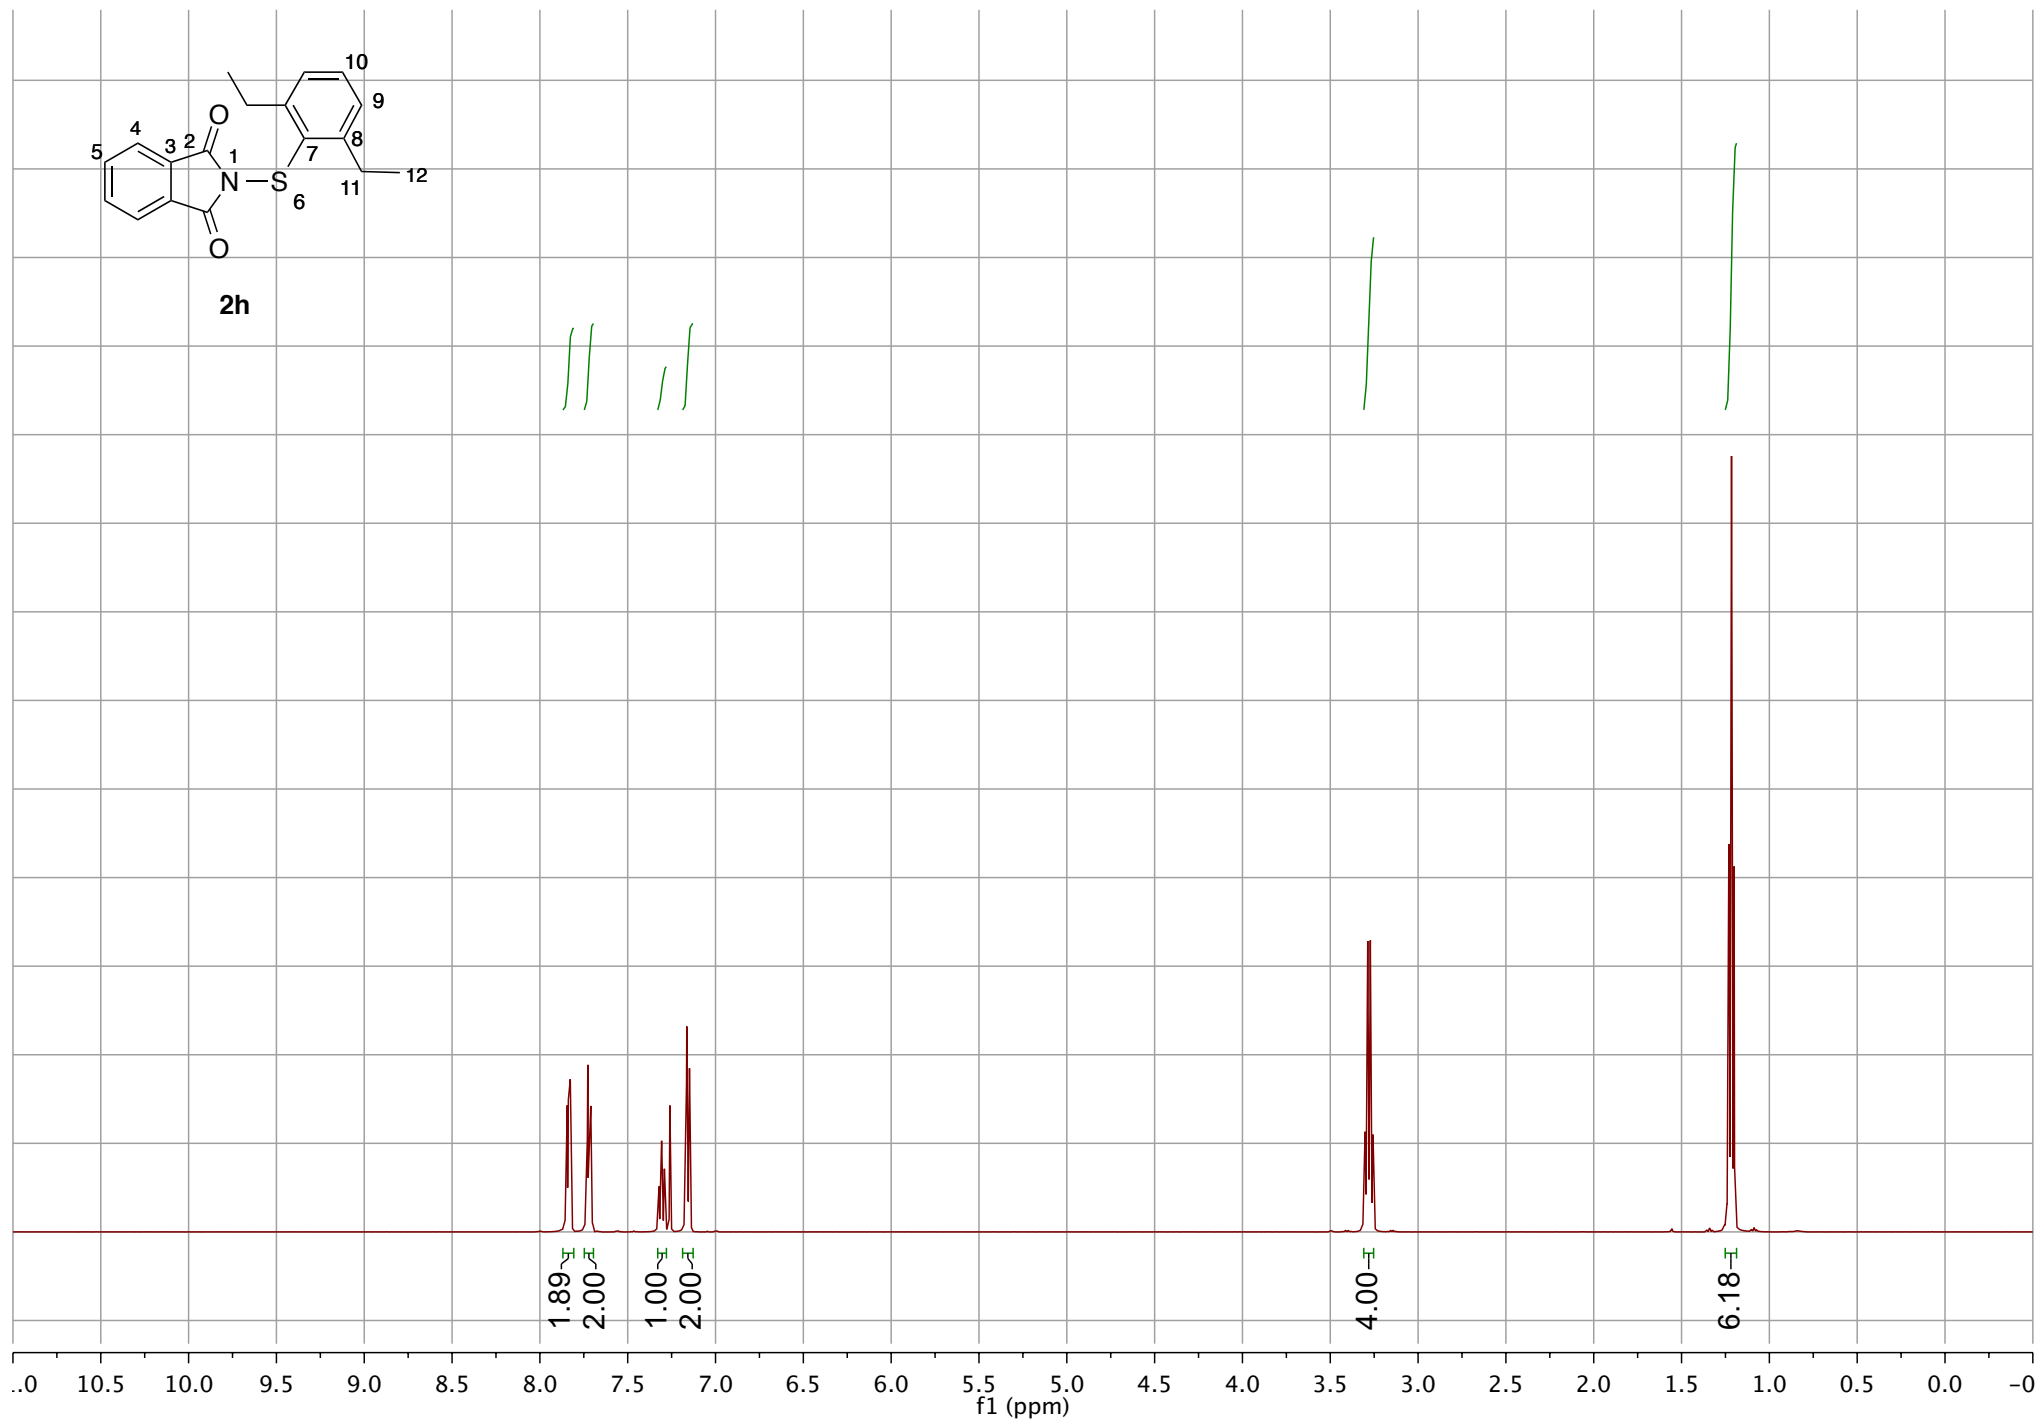

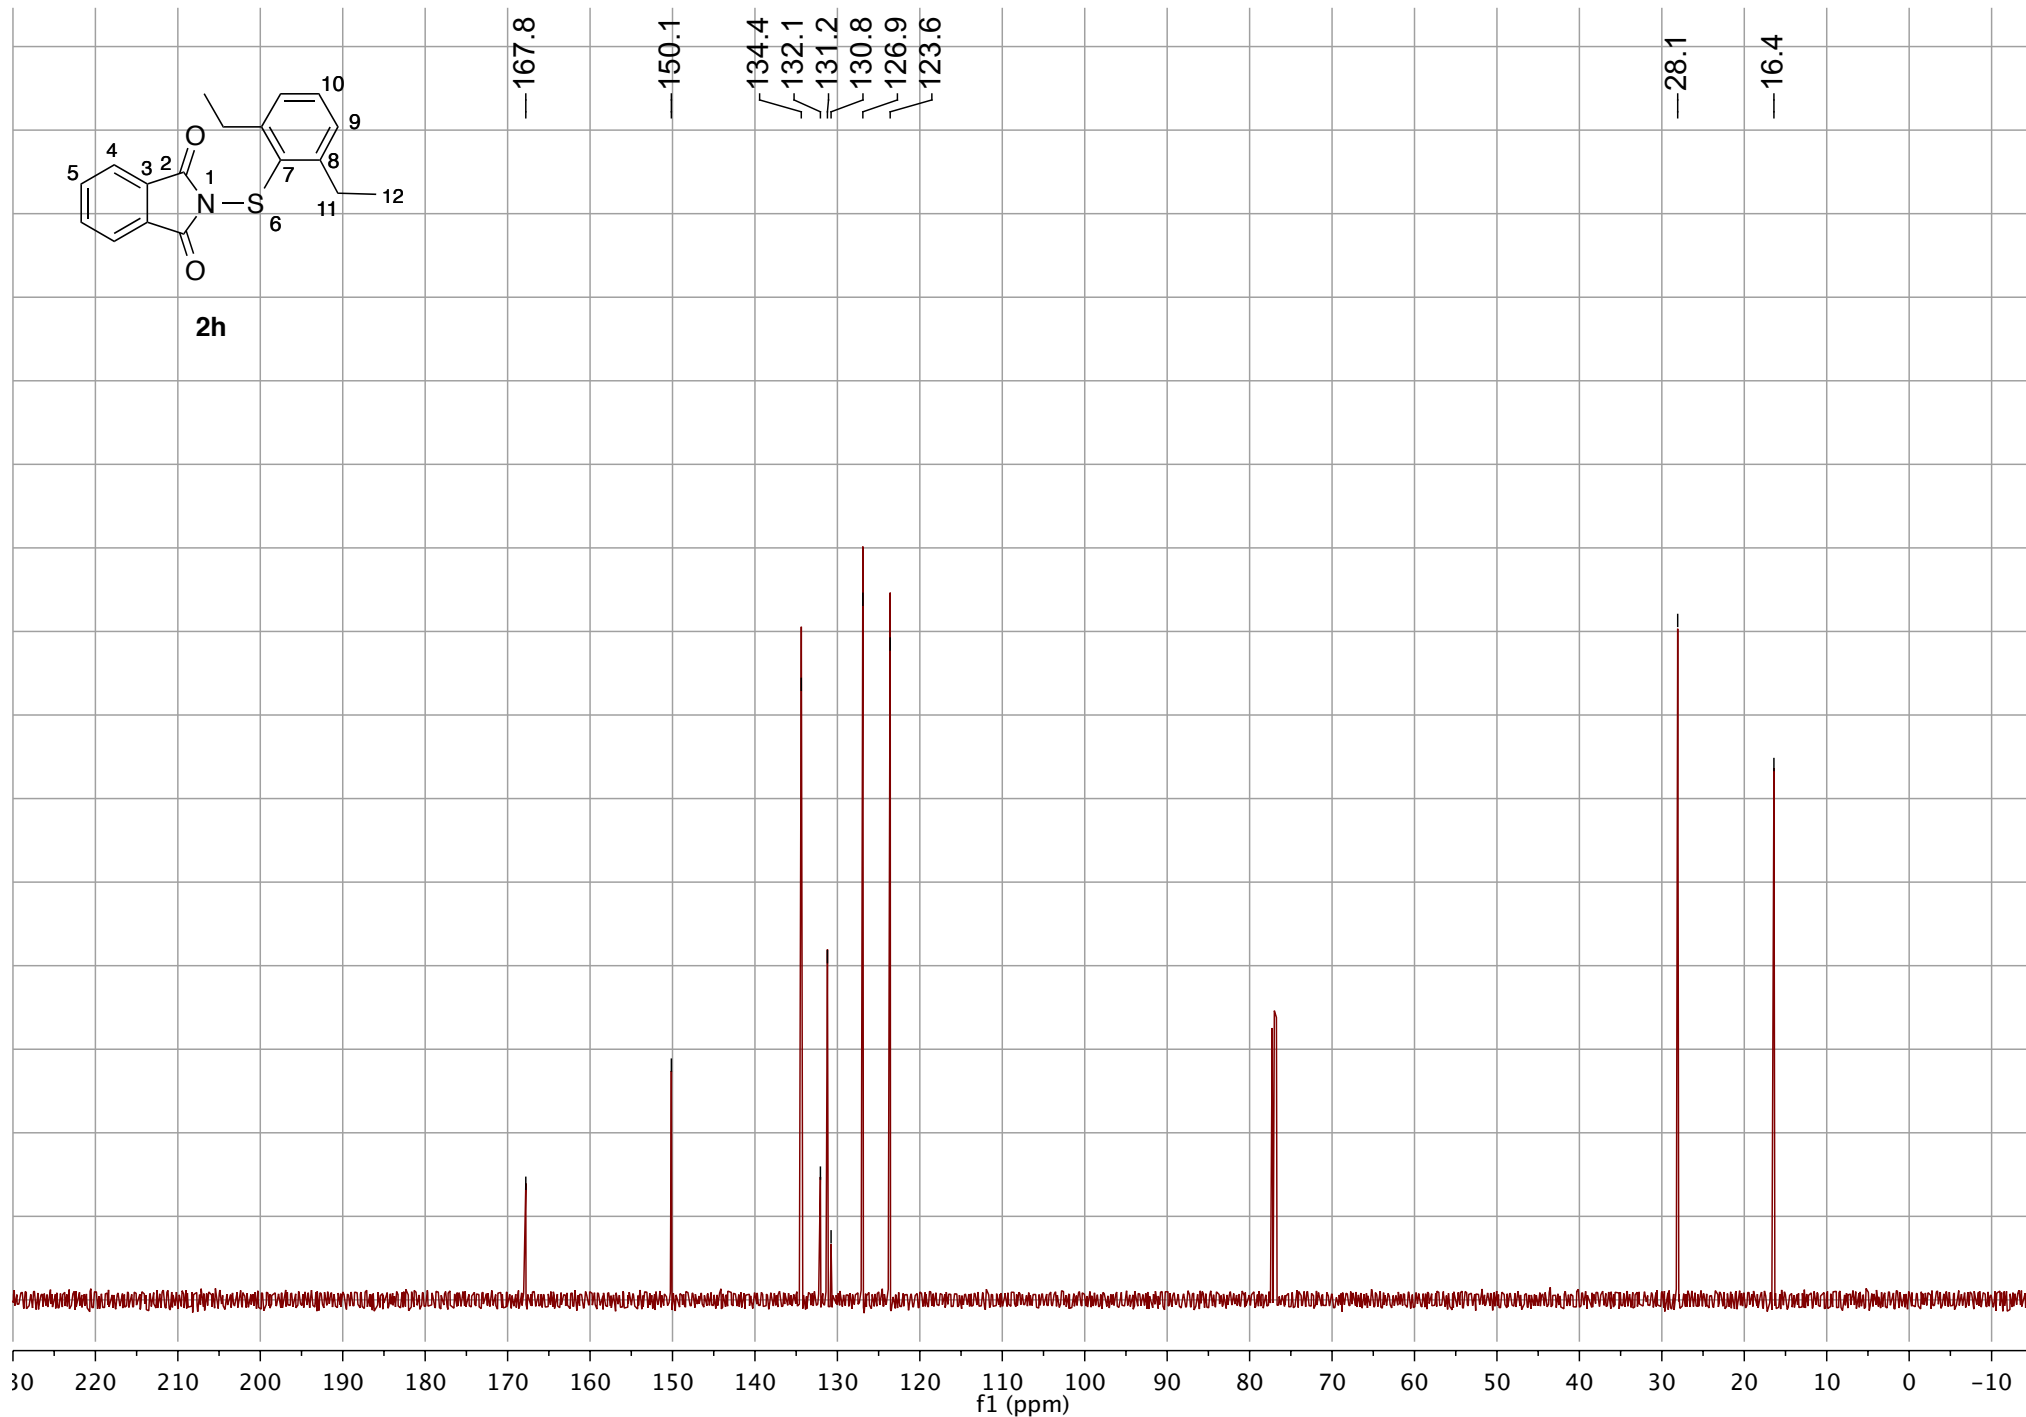



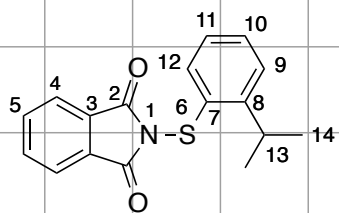

2i

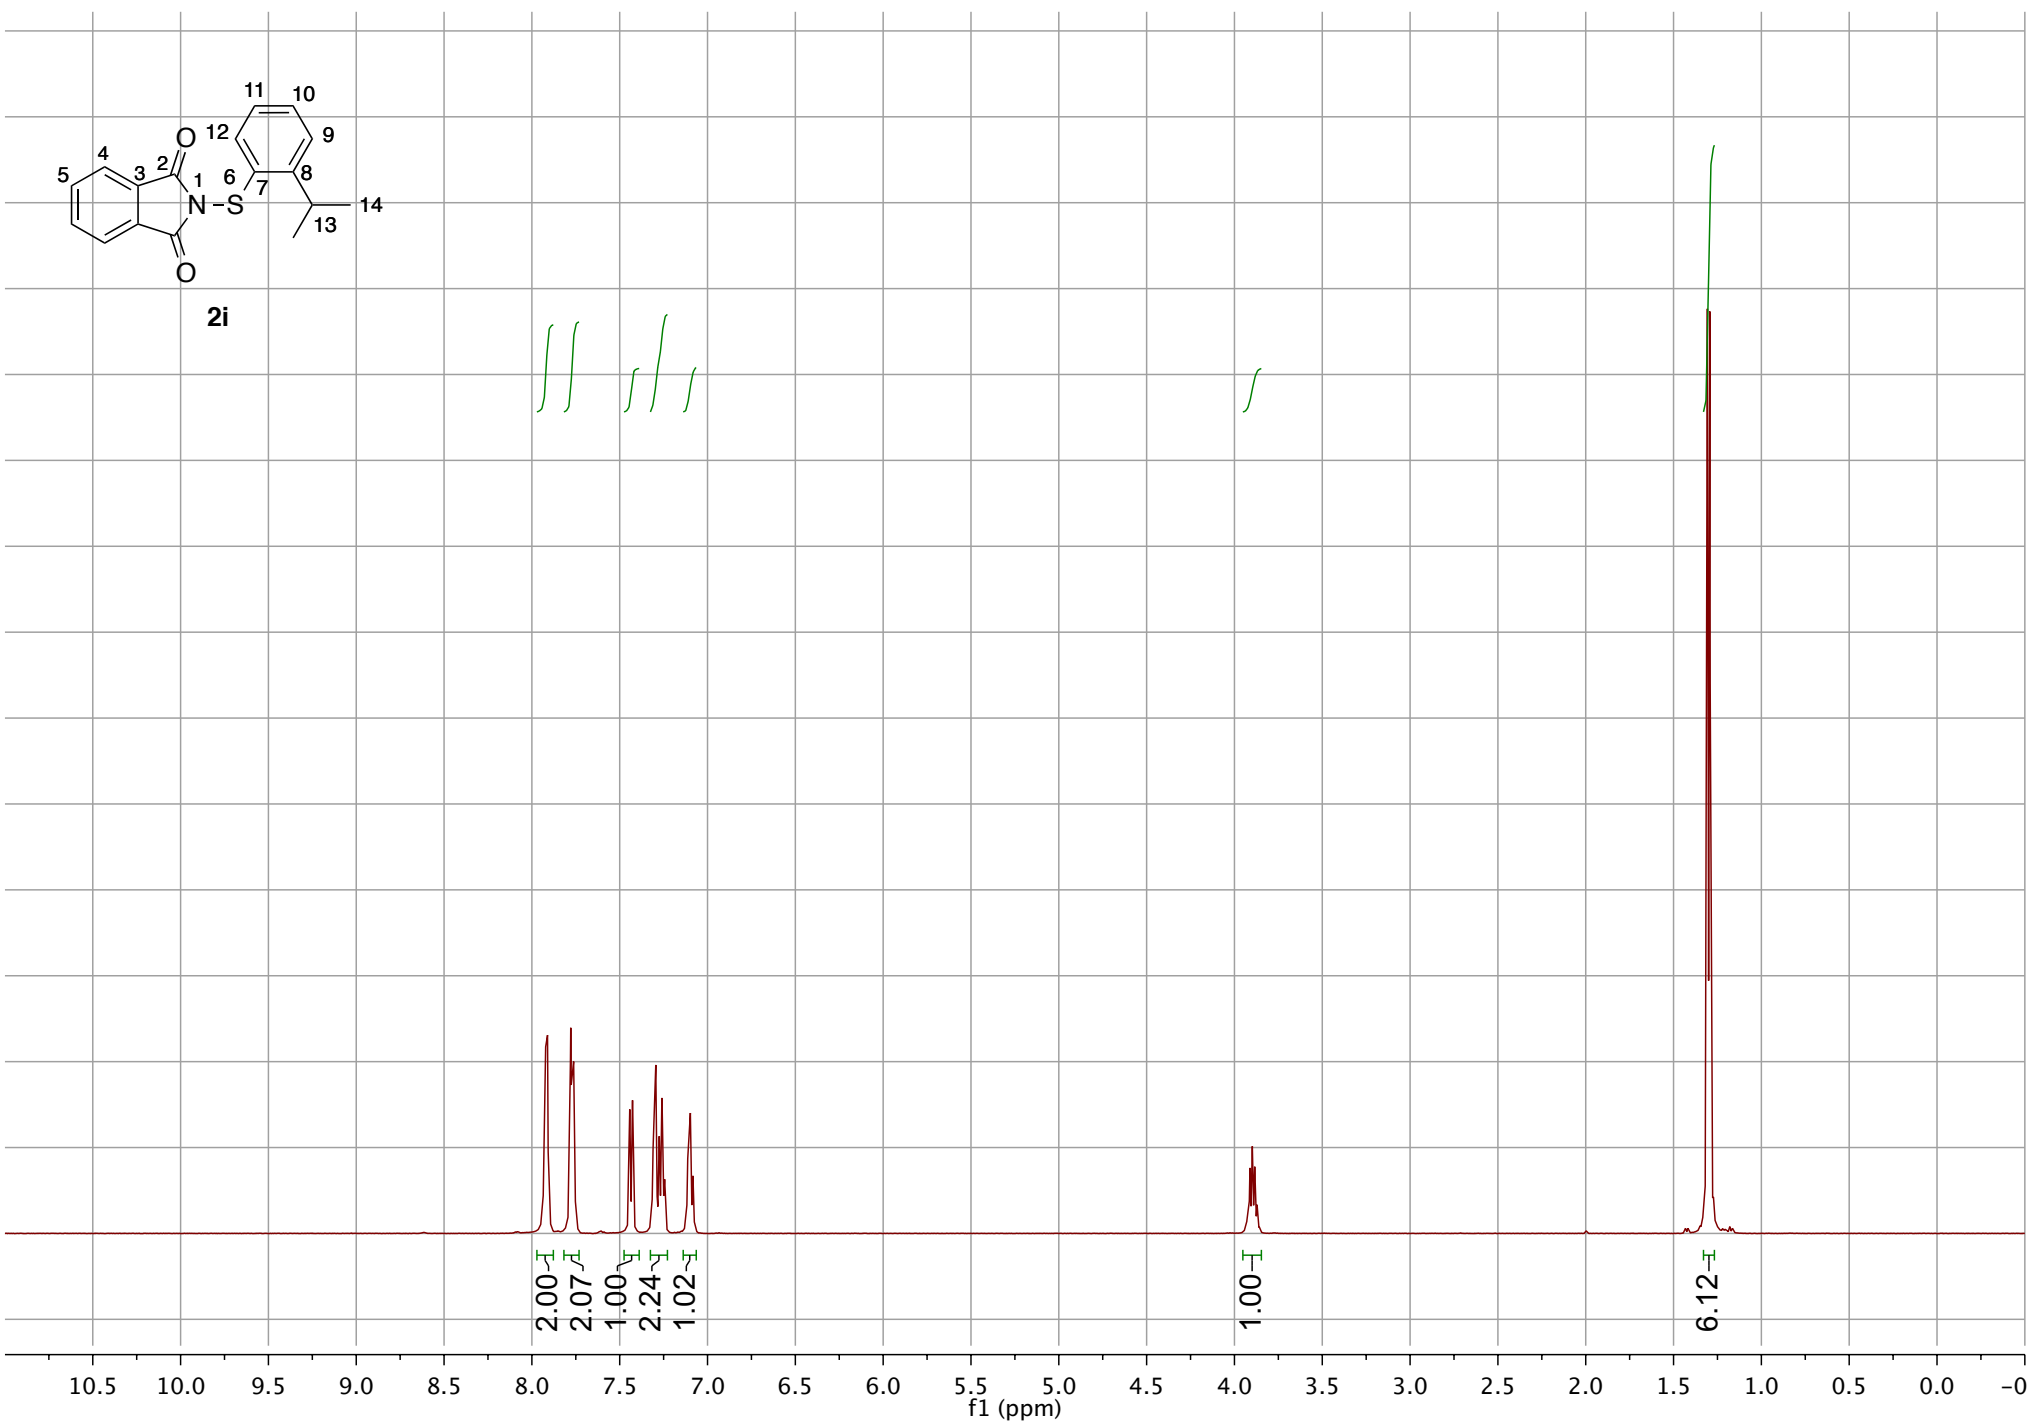

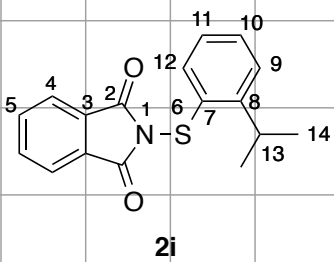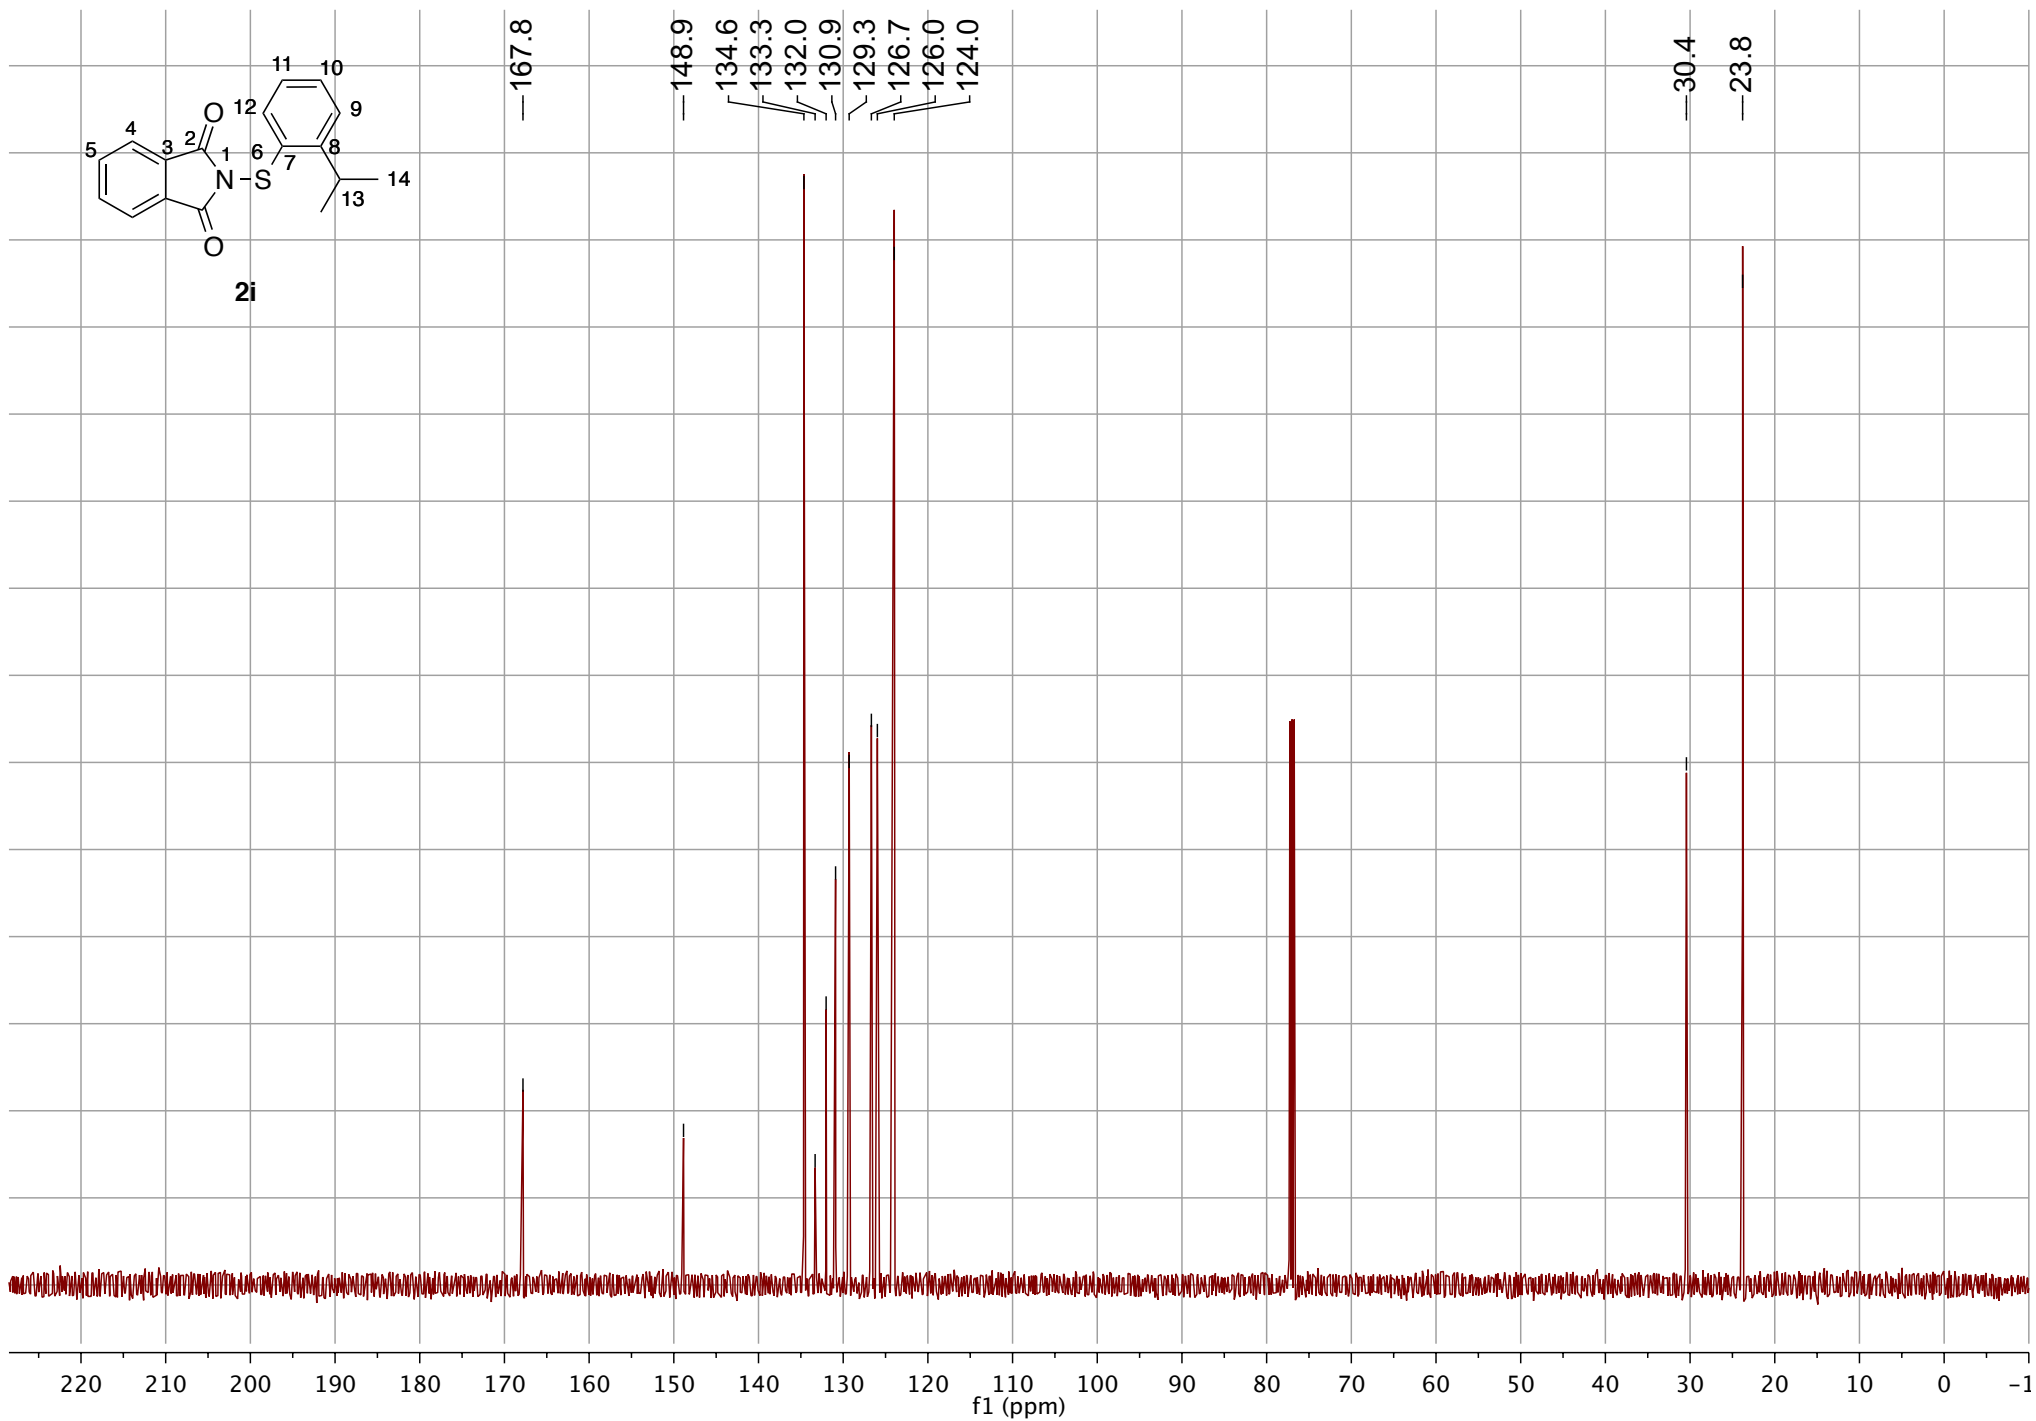

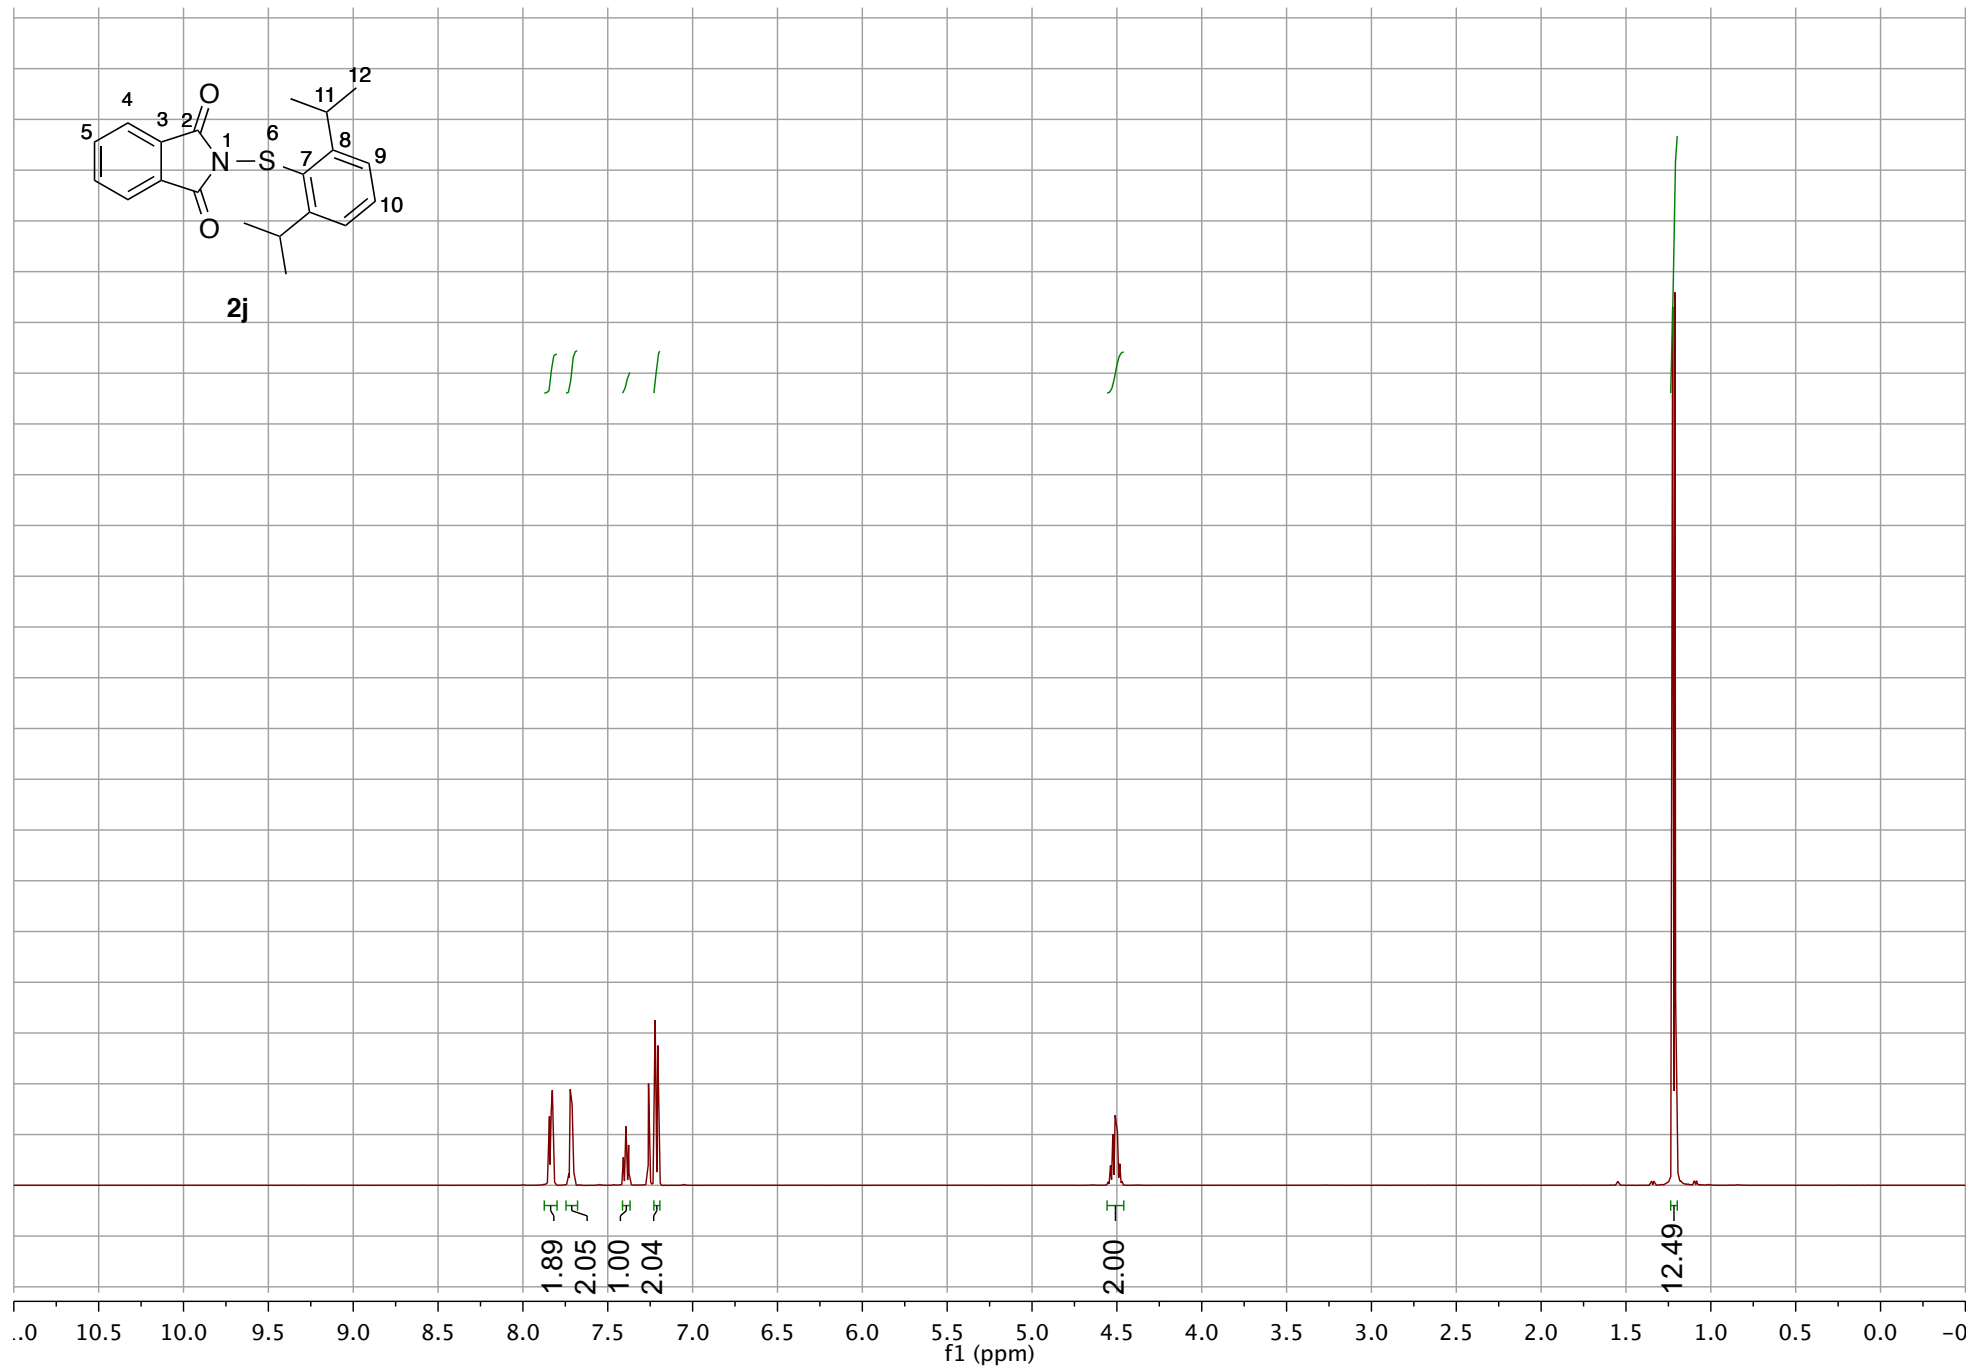

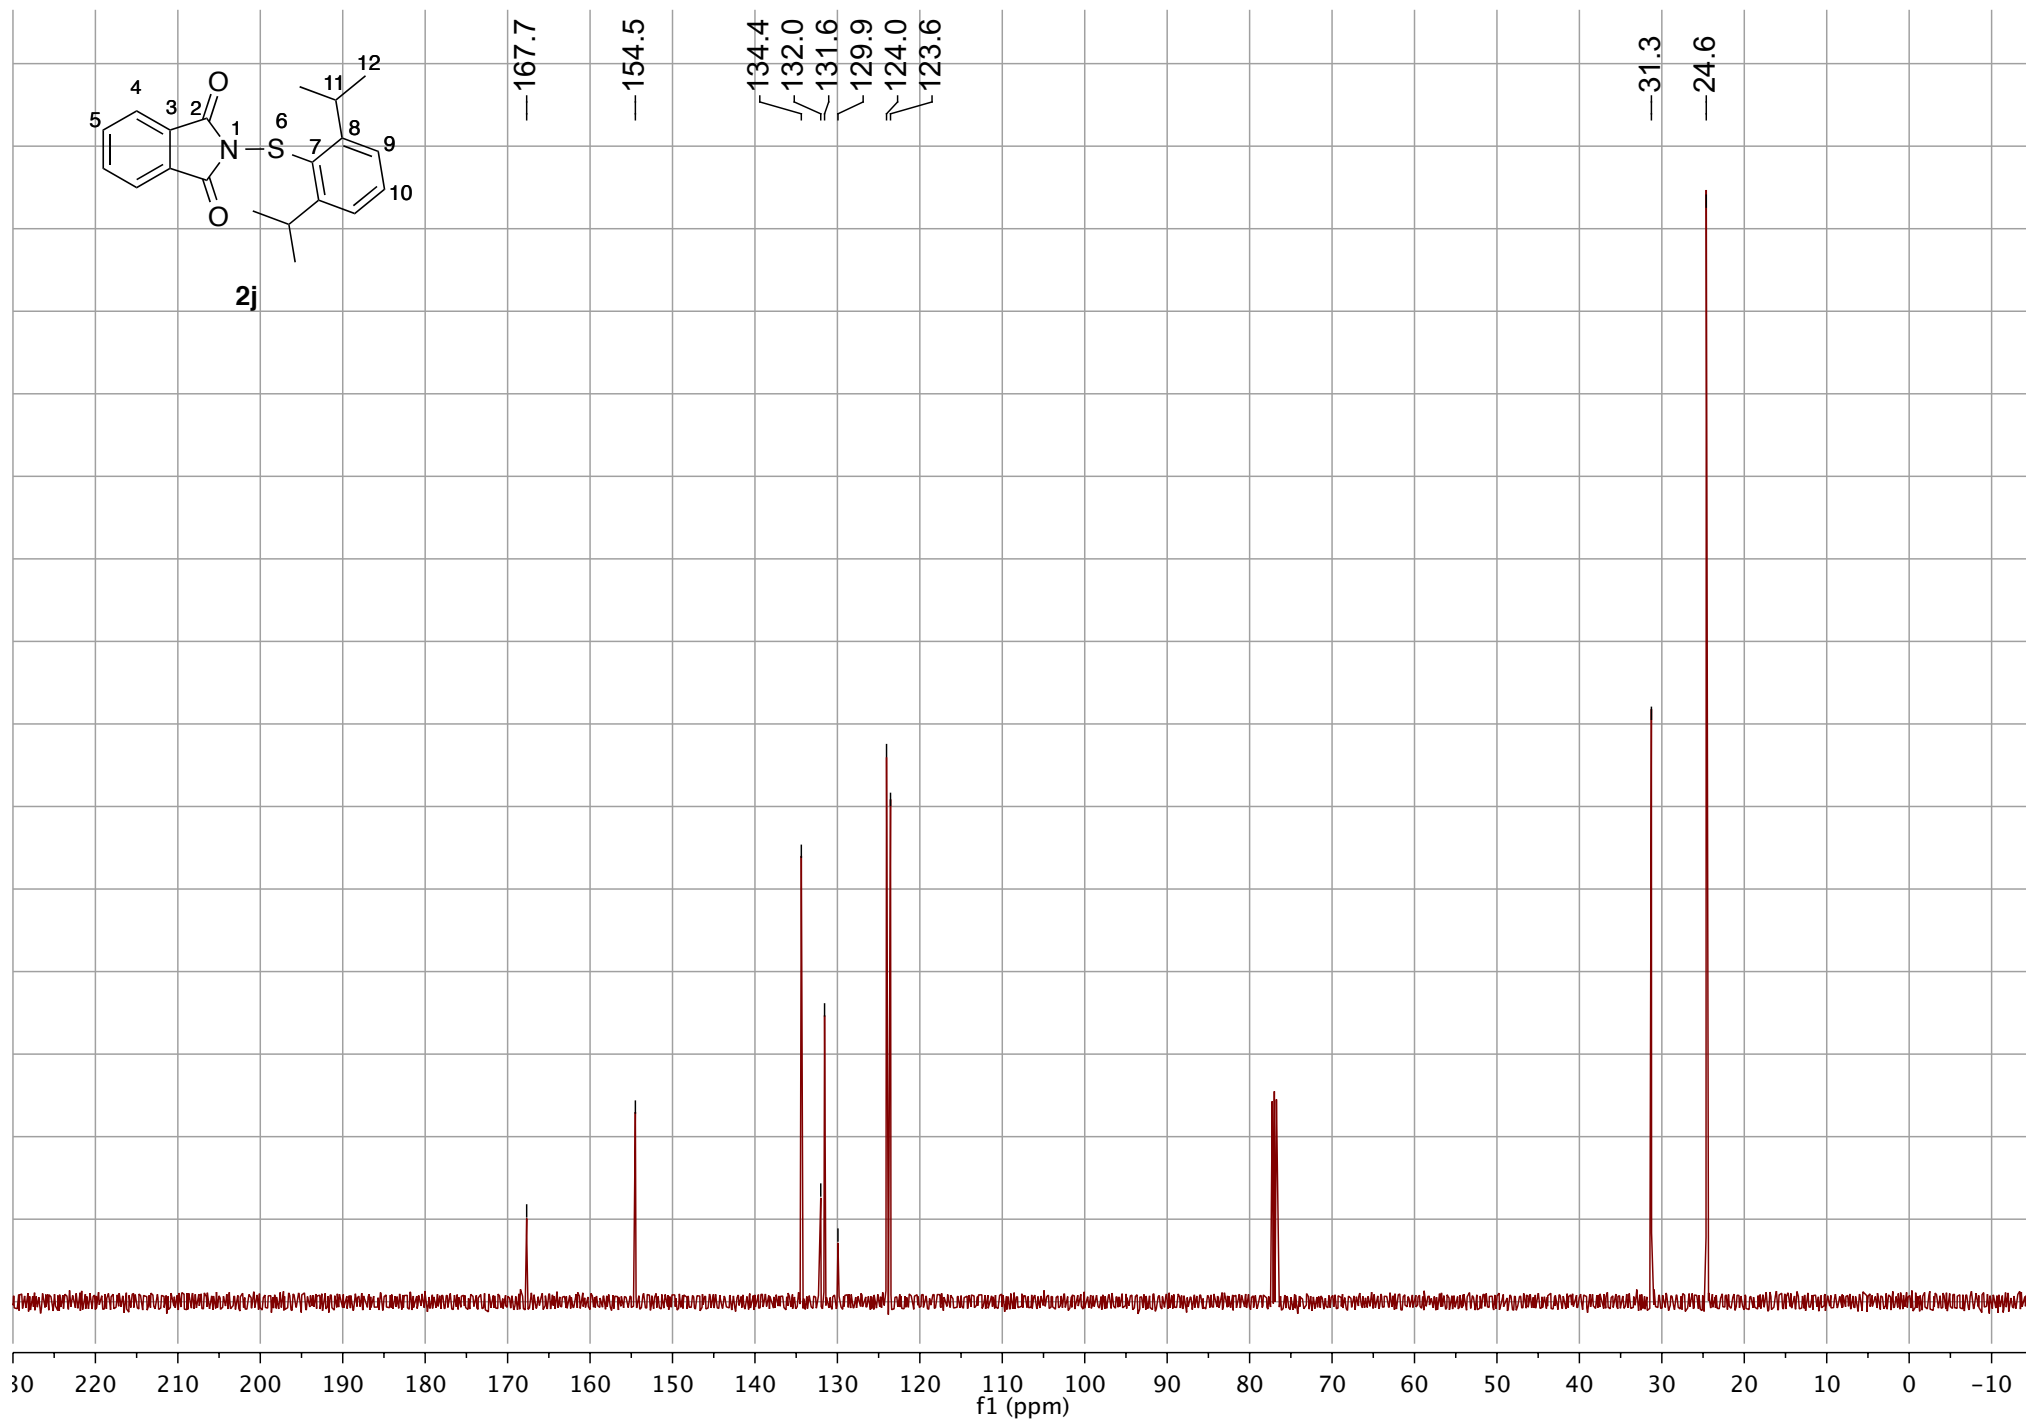

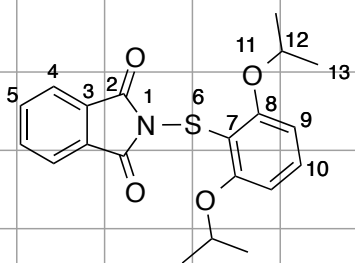

2k

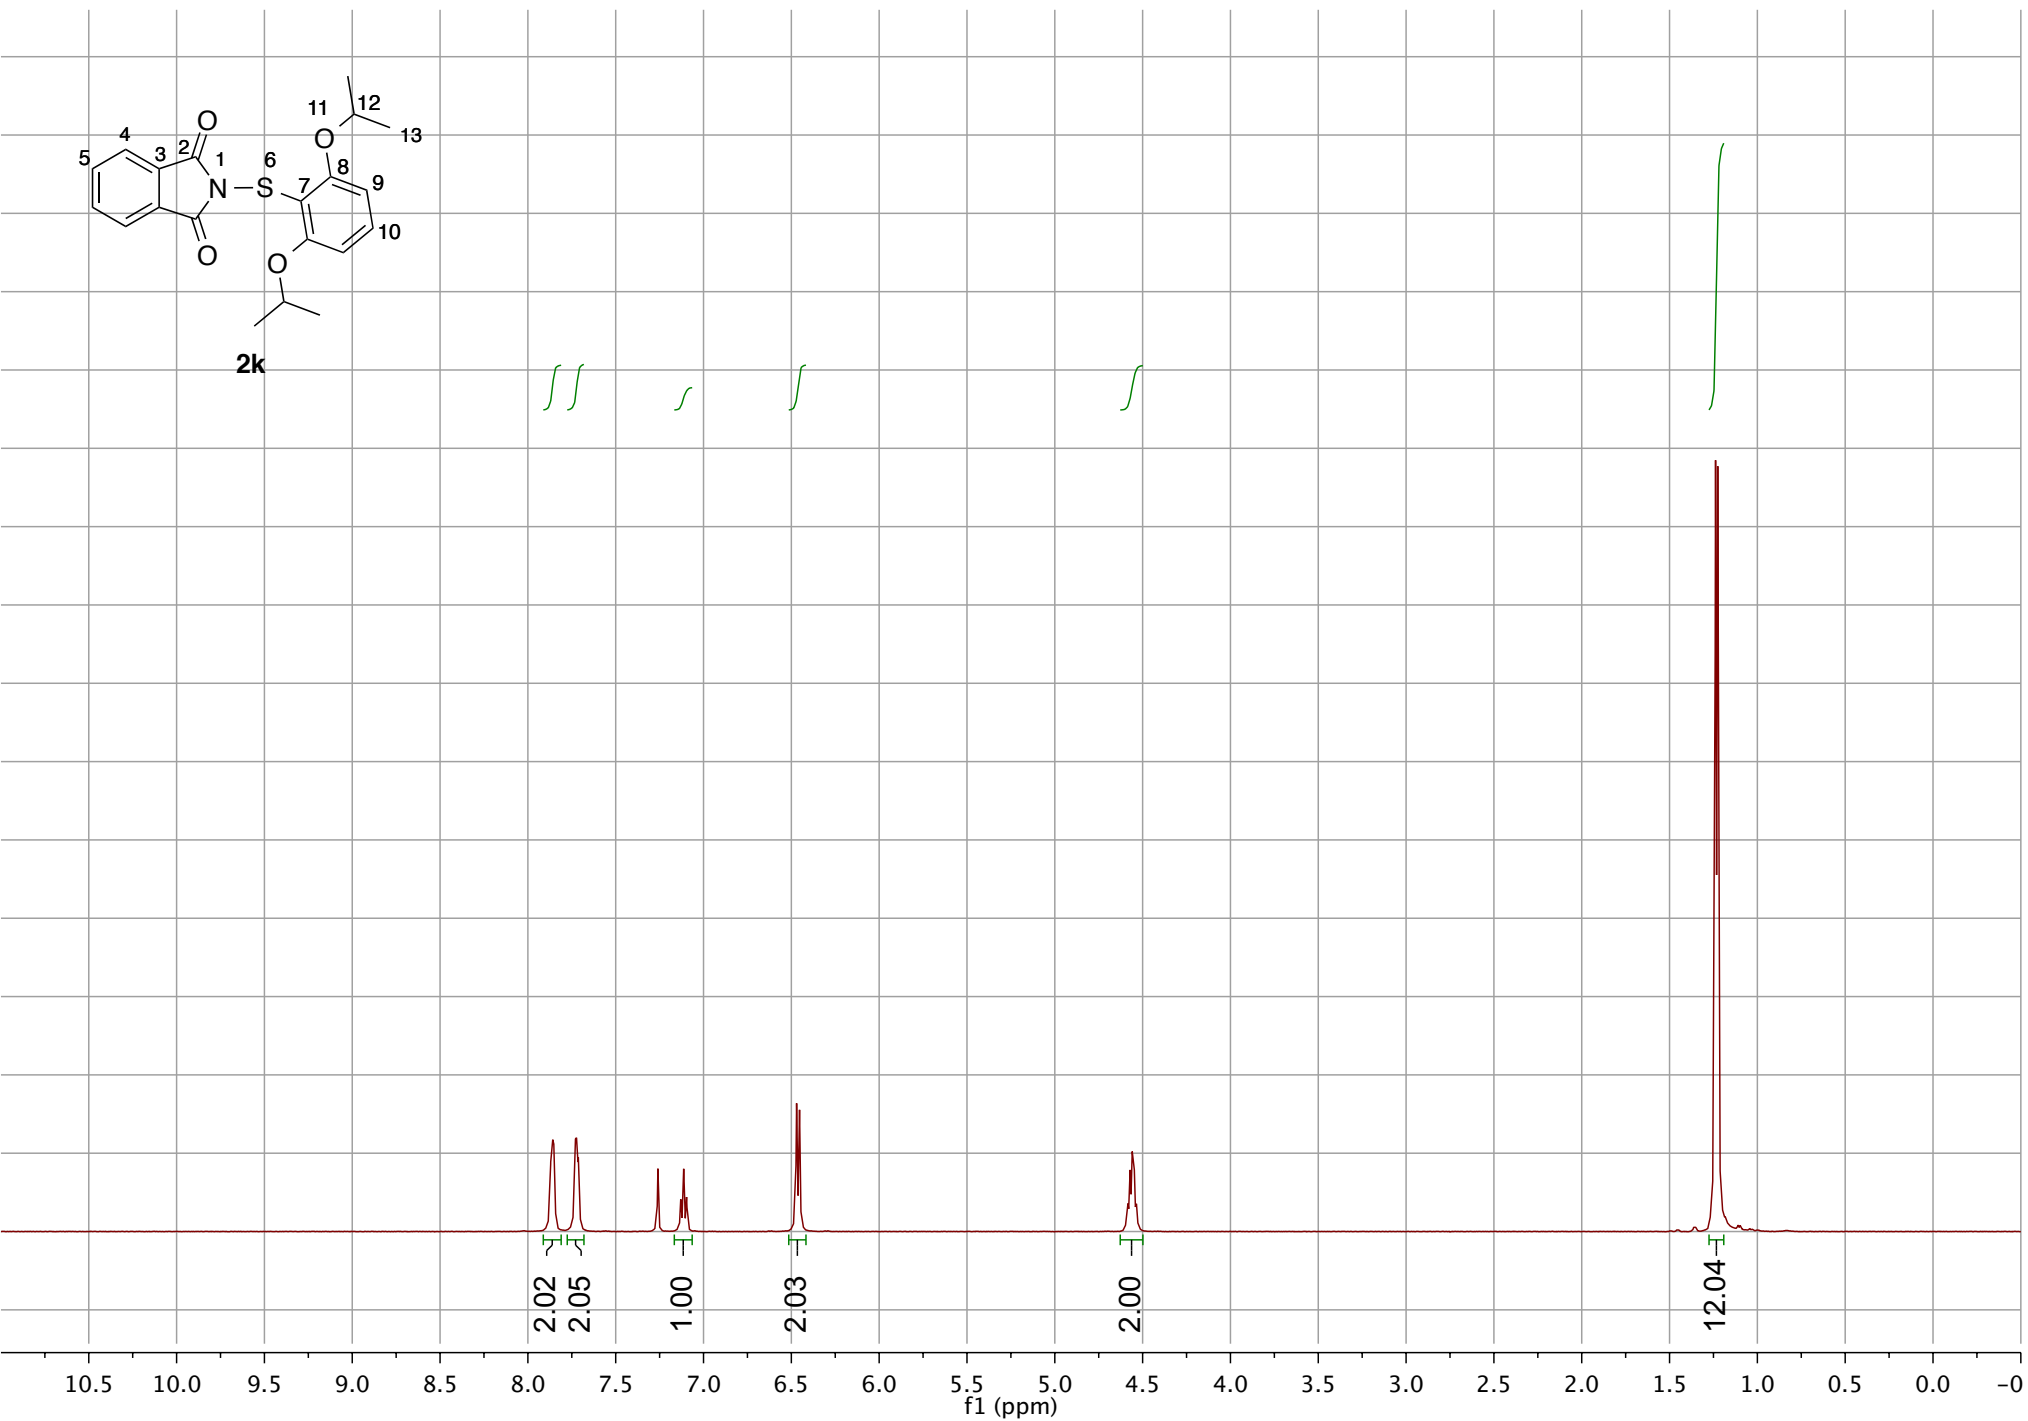

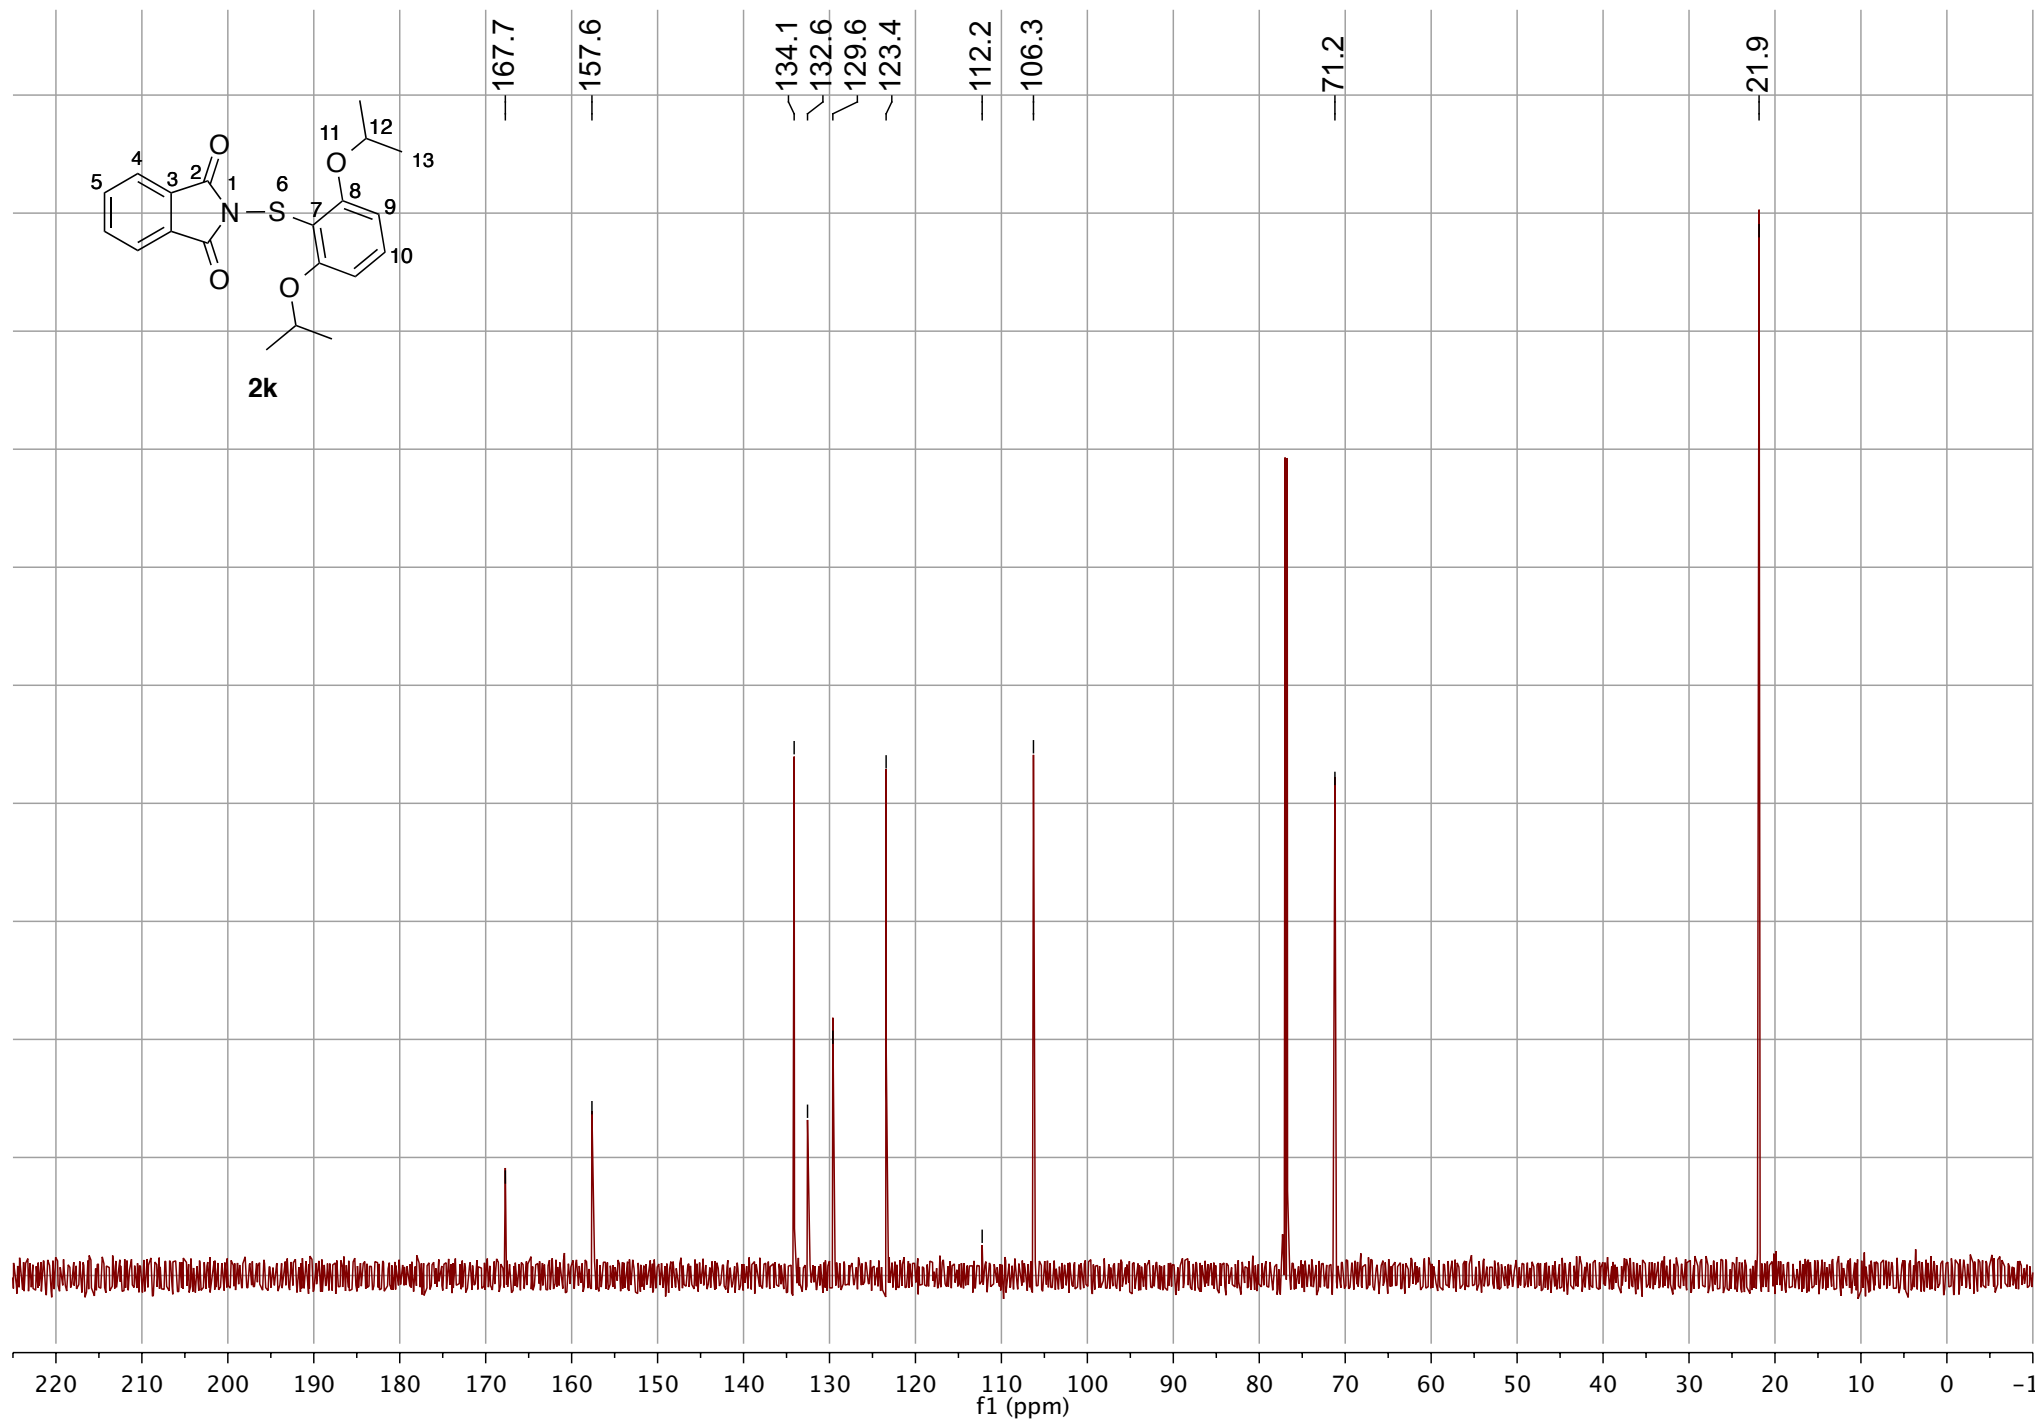

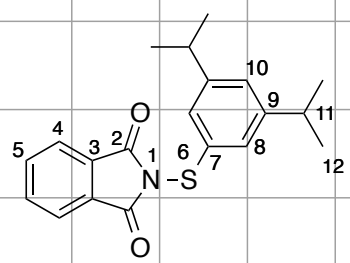

21

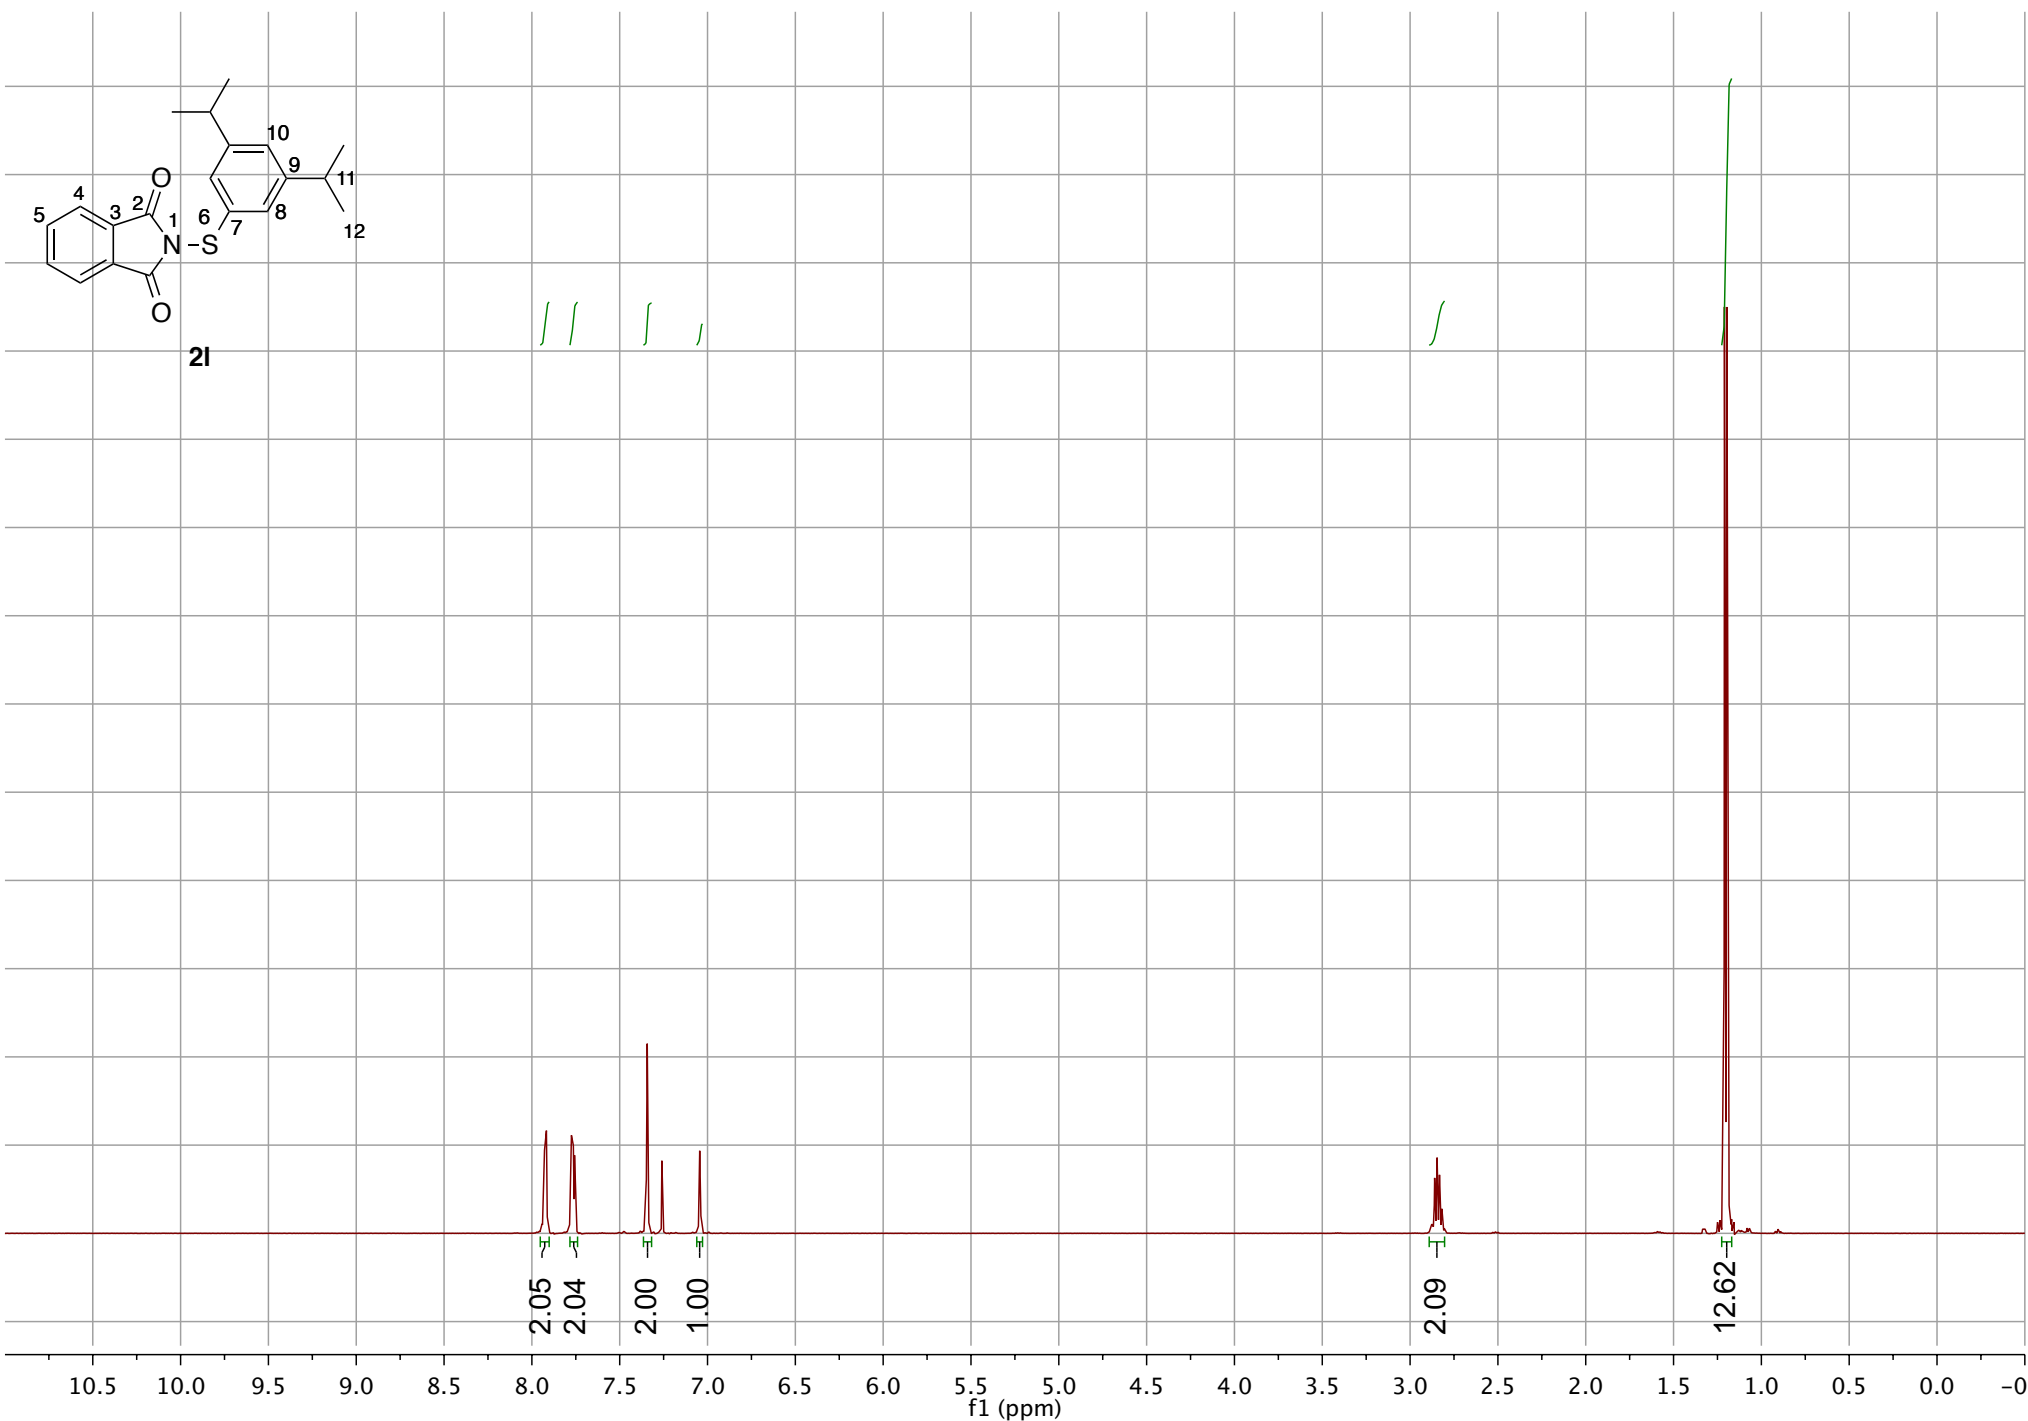

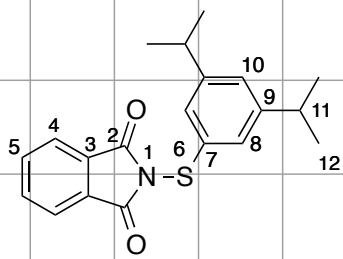

21

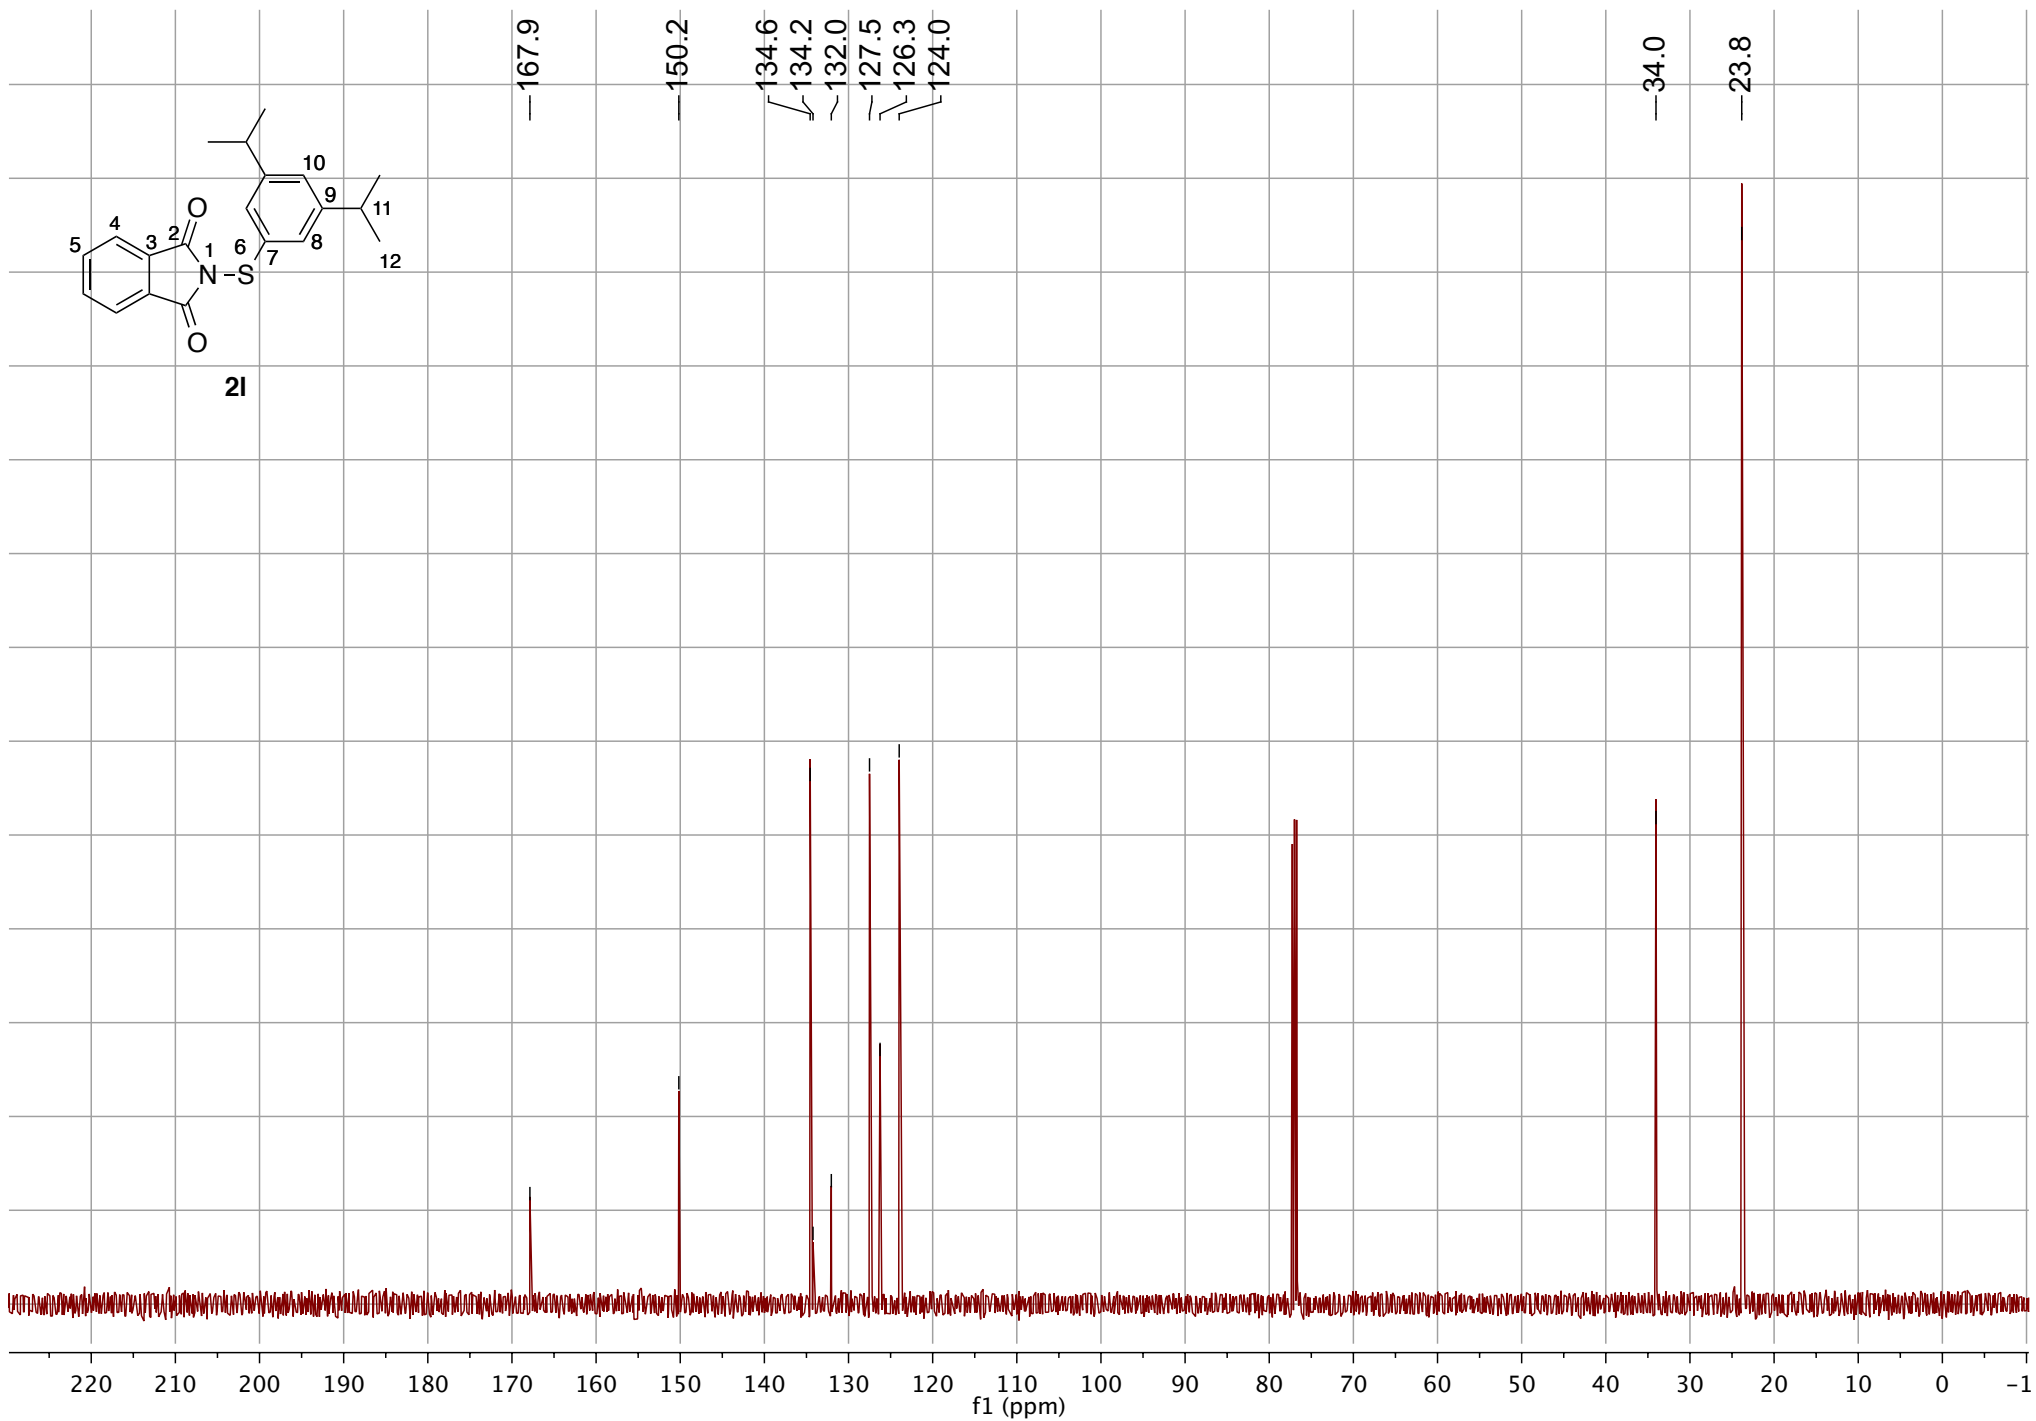



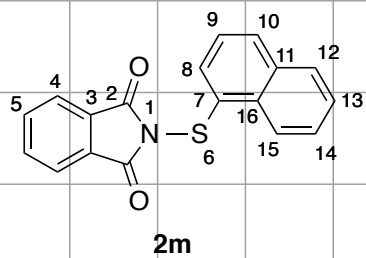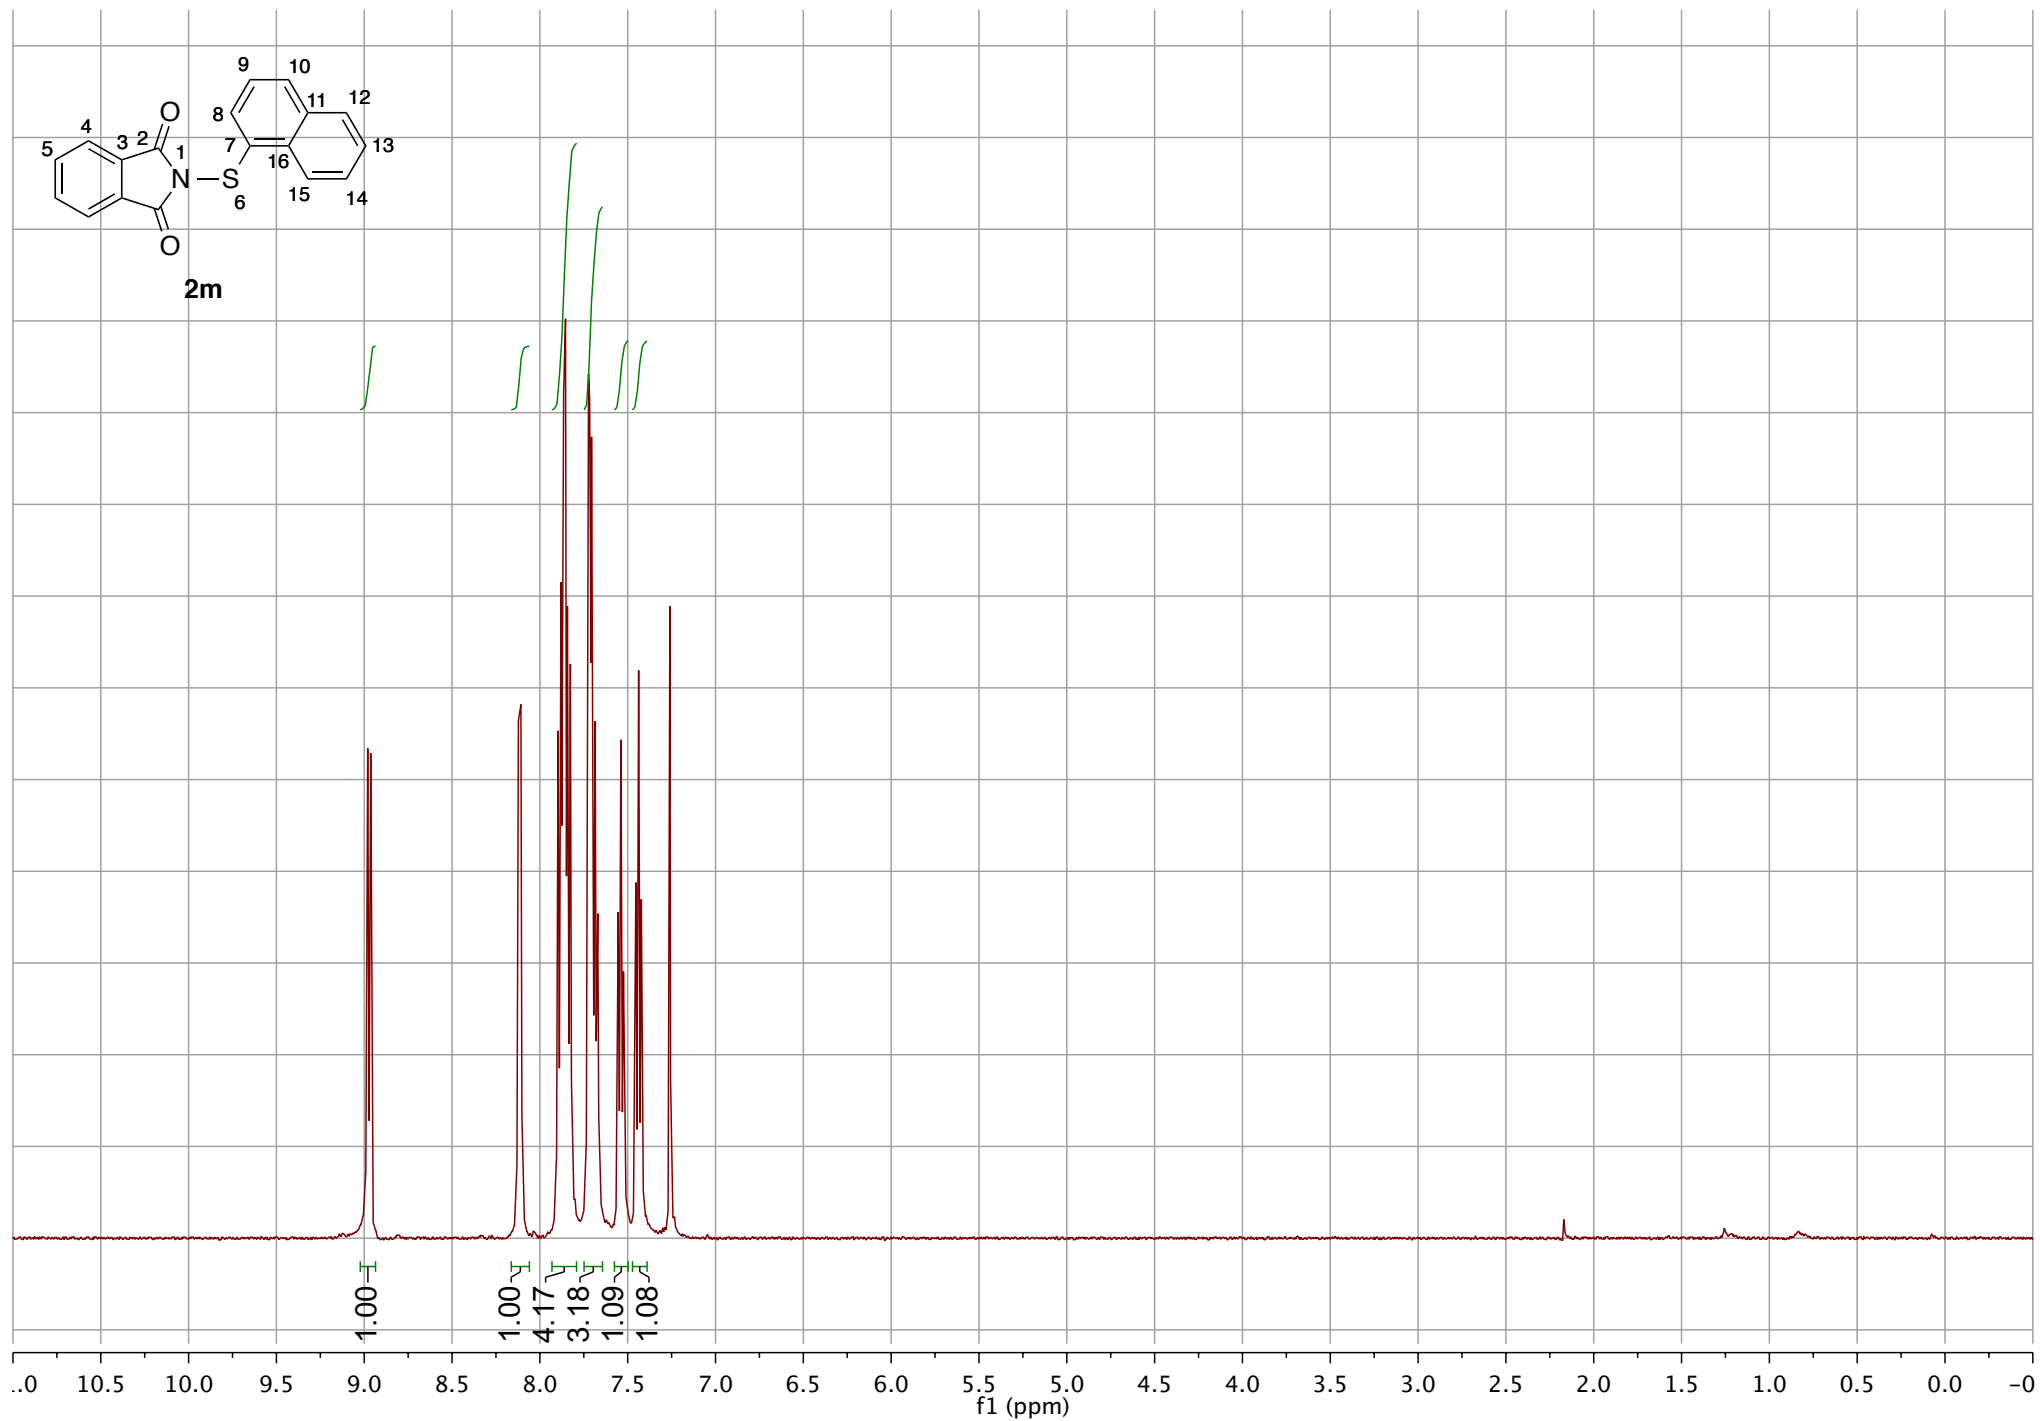

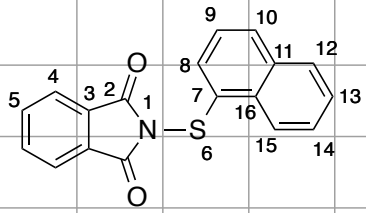

2m

- 167.9
- 134.5
- 134.5
- 134.0
- 133.1
- 132.0
- 131.4
- 131.1
- 128.3
- 127.4
- 126.6
- 125.8
- 125.5
- 123.9

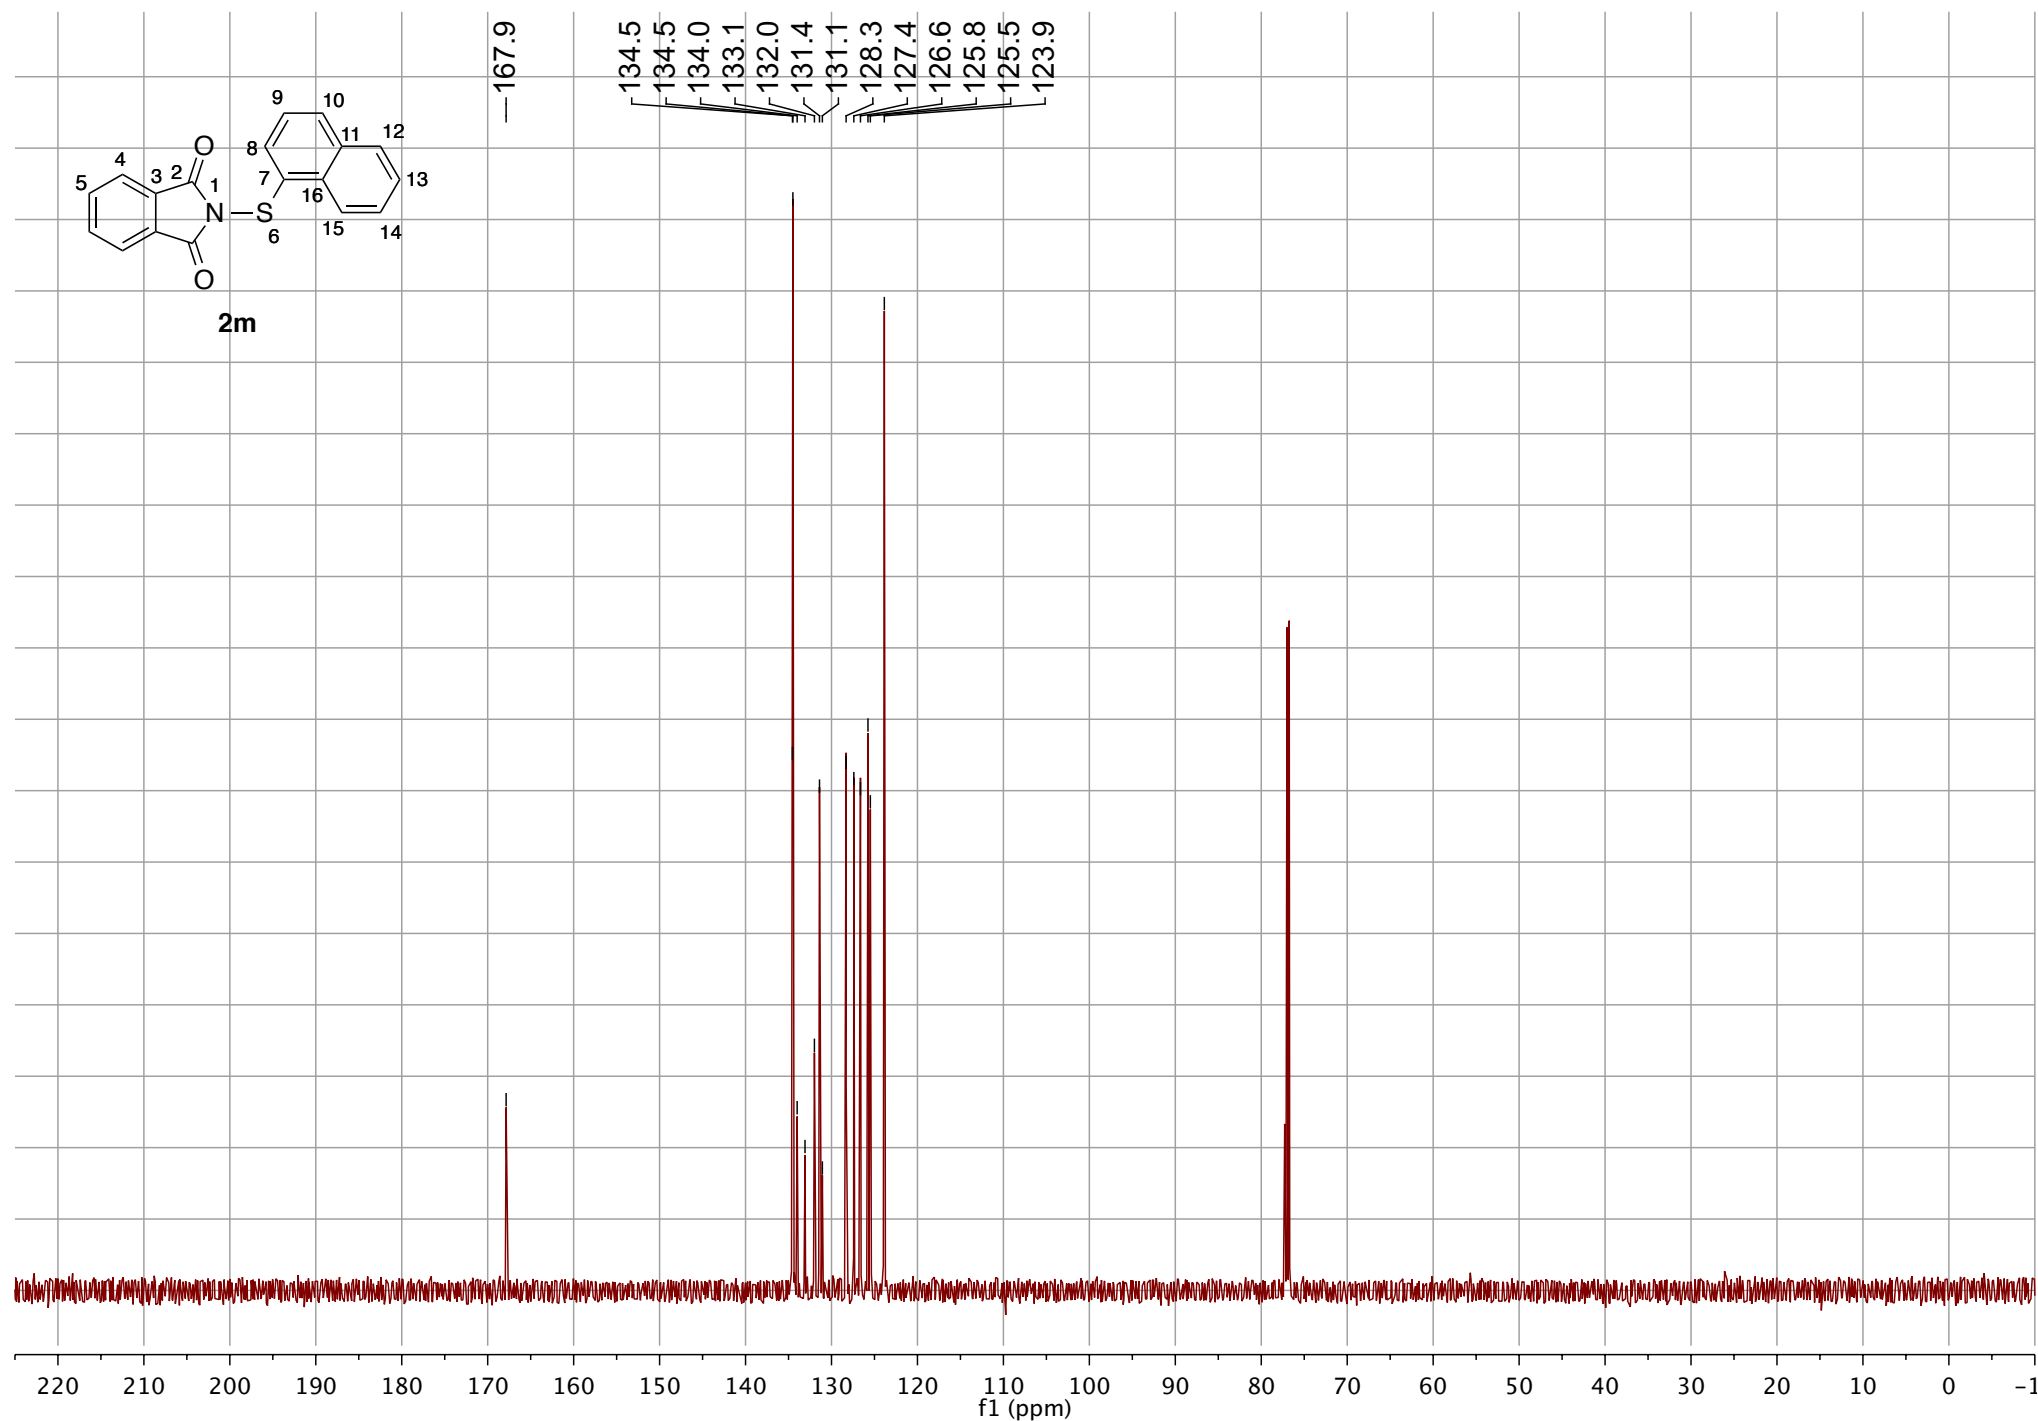

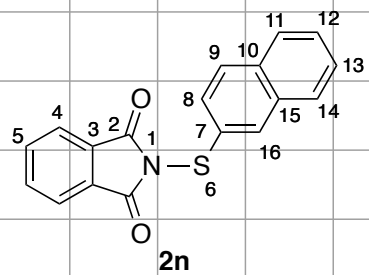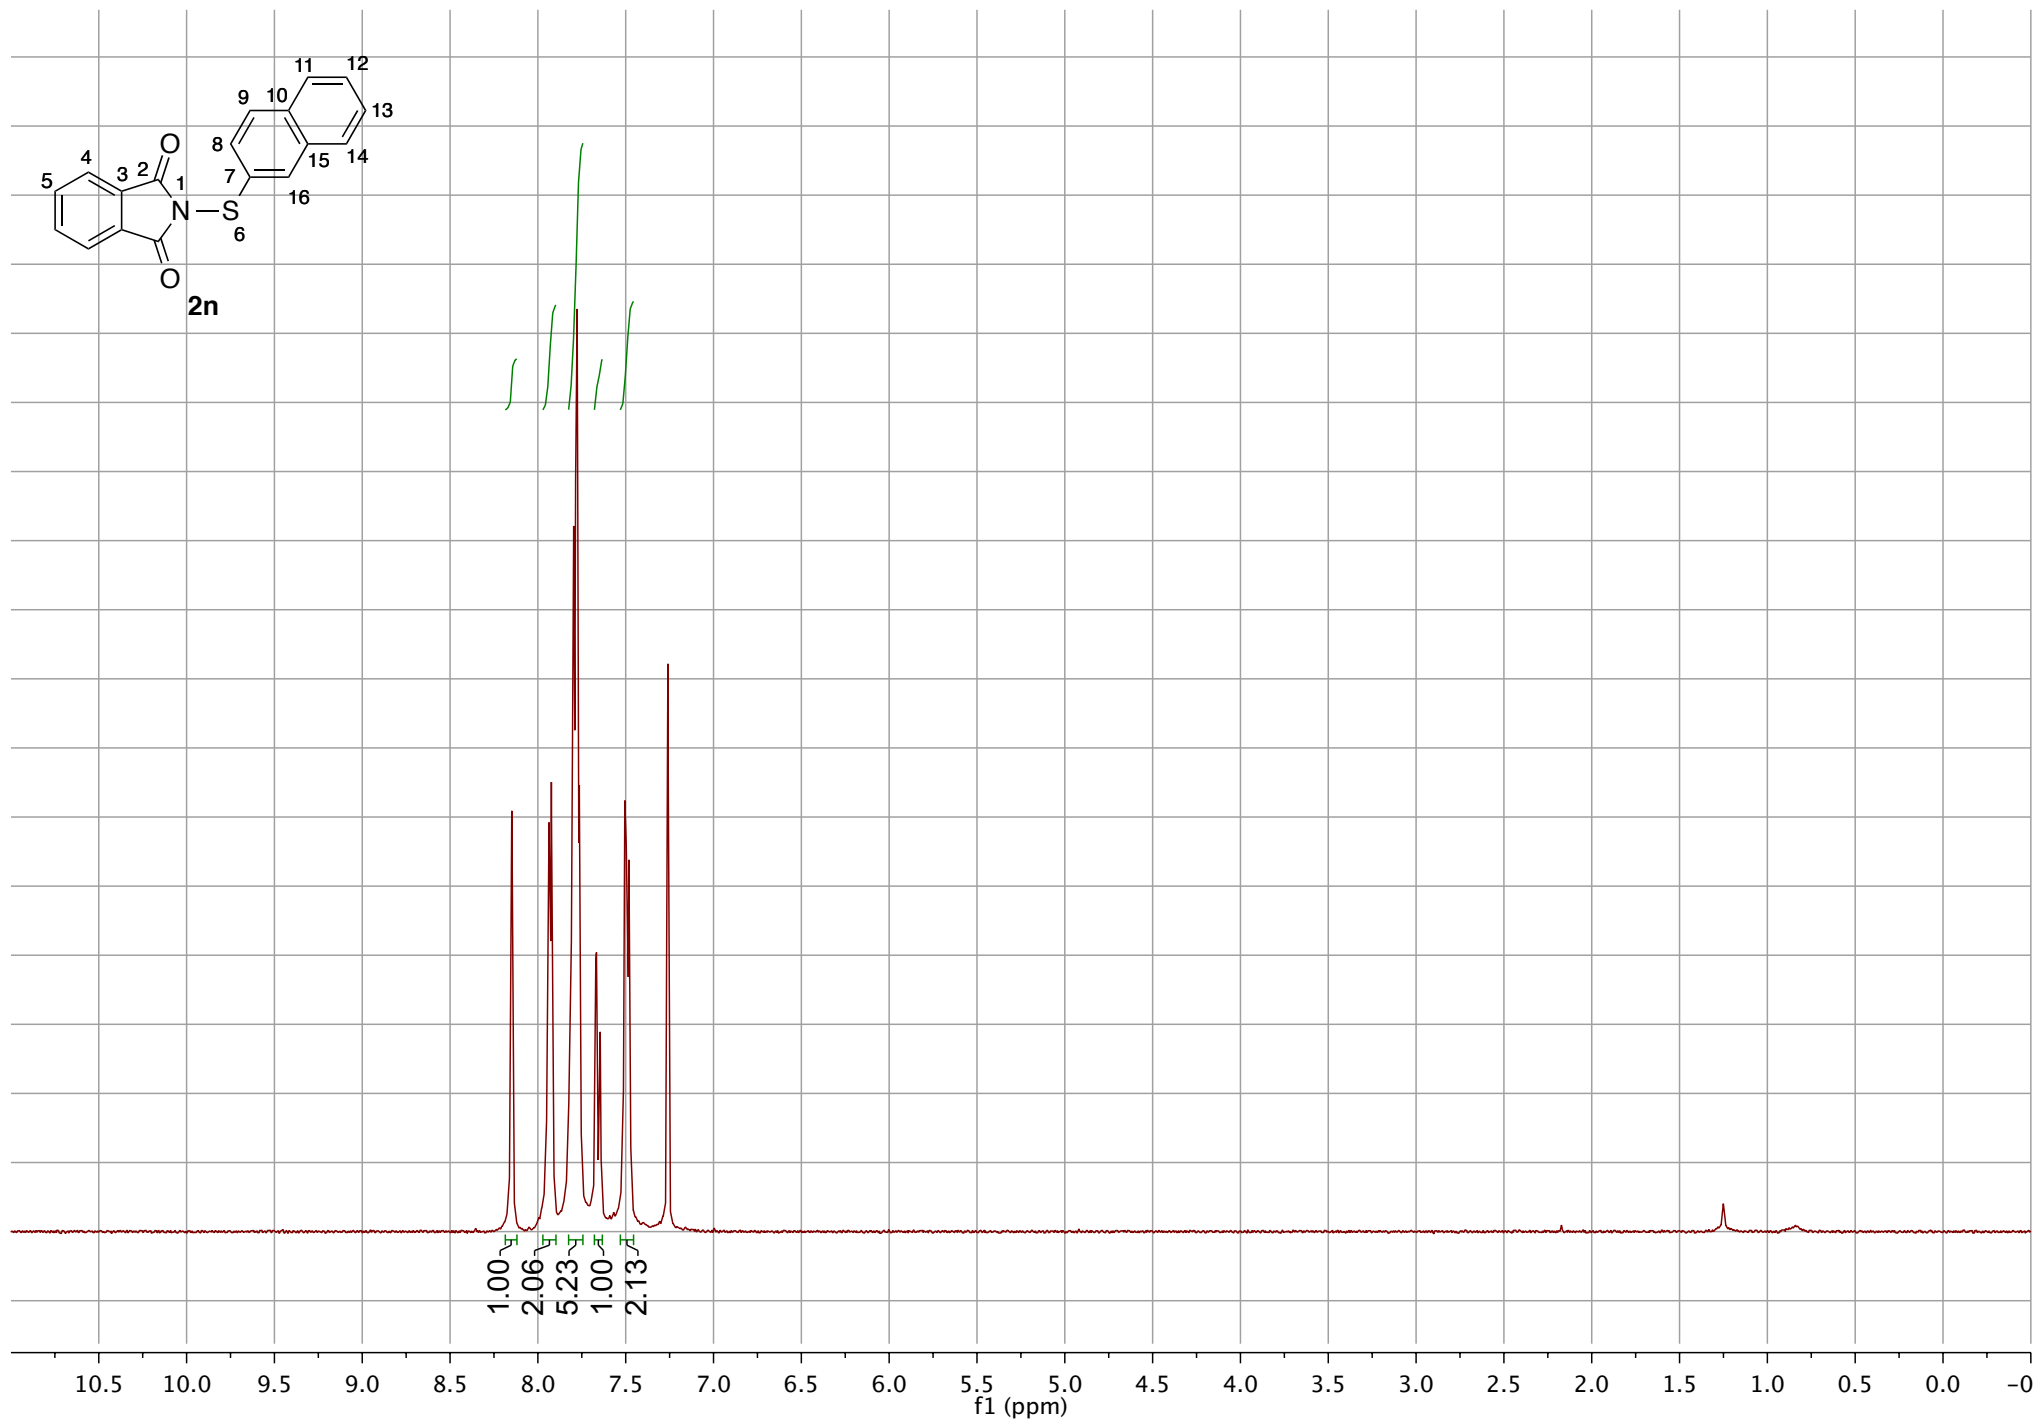

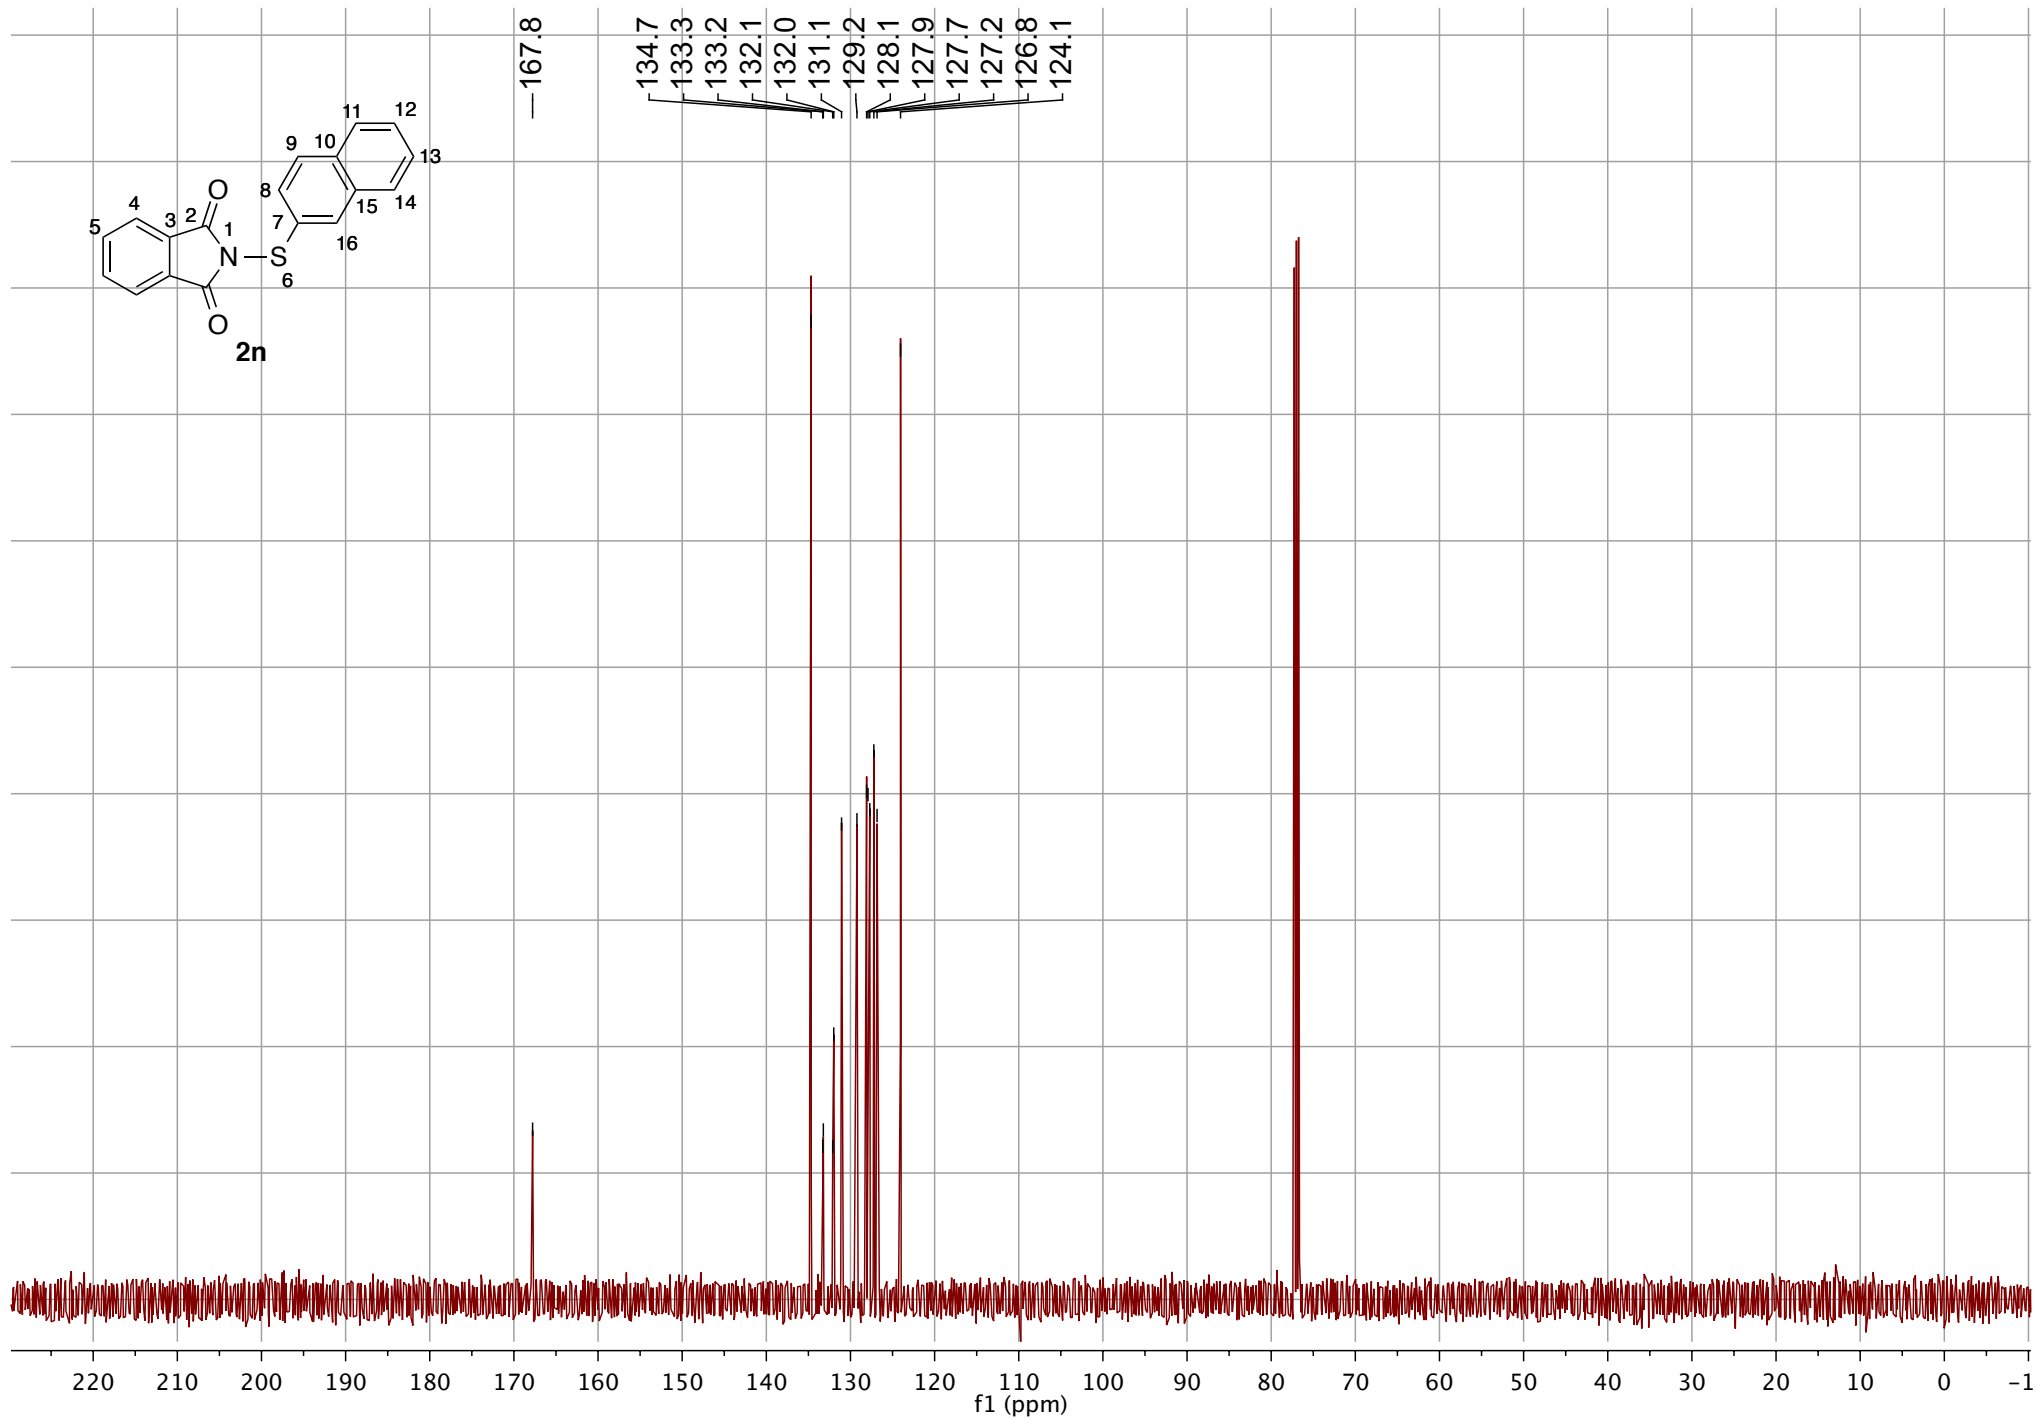

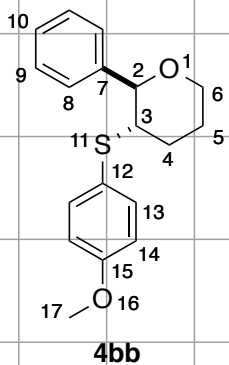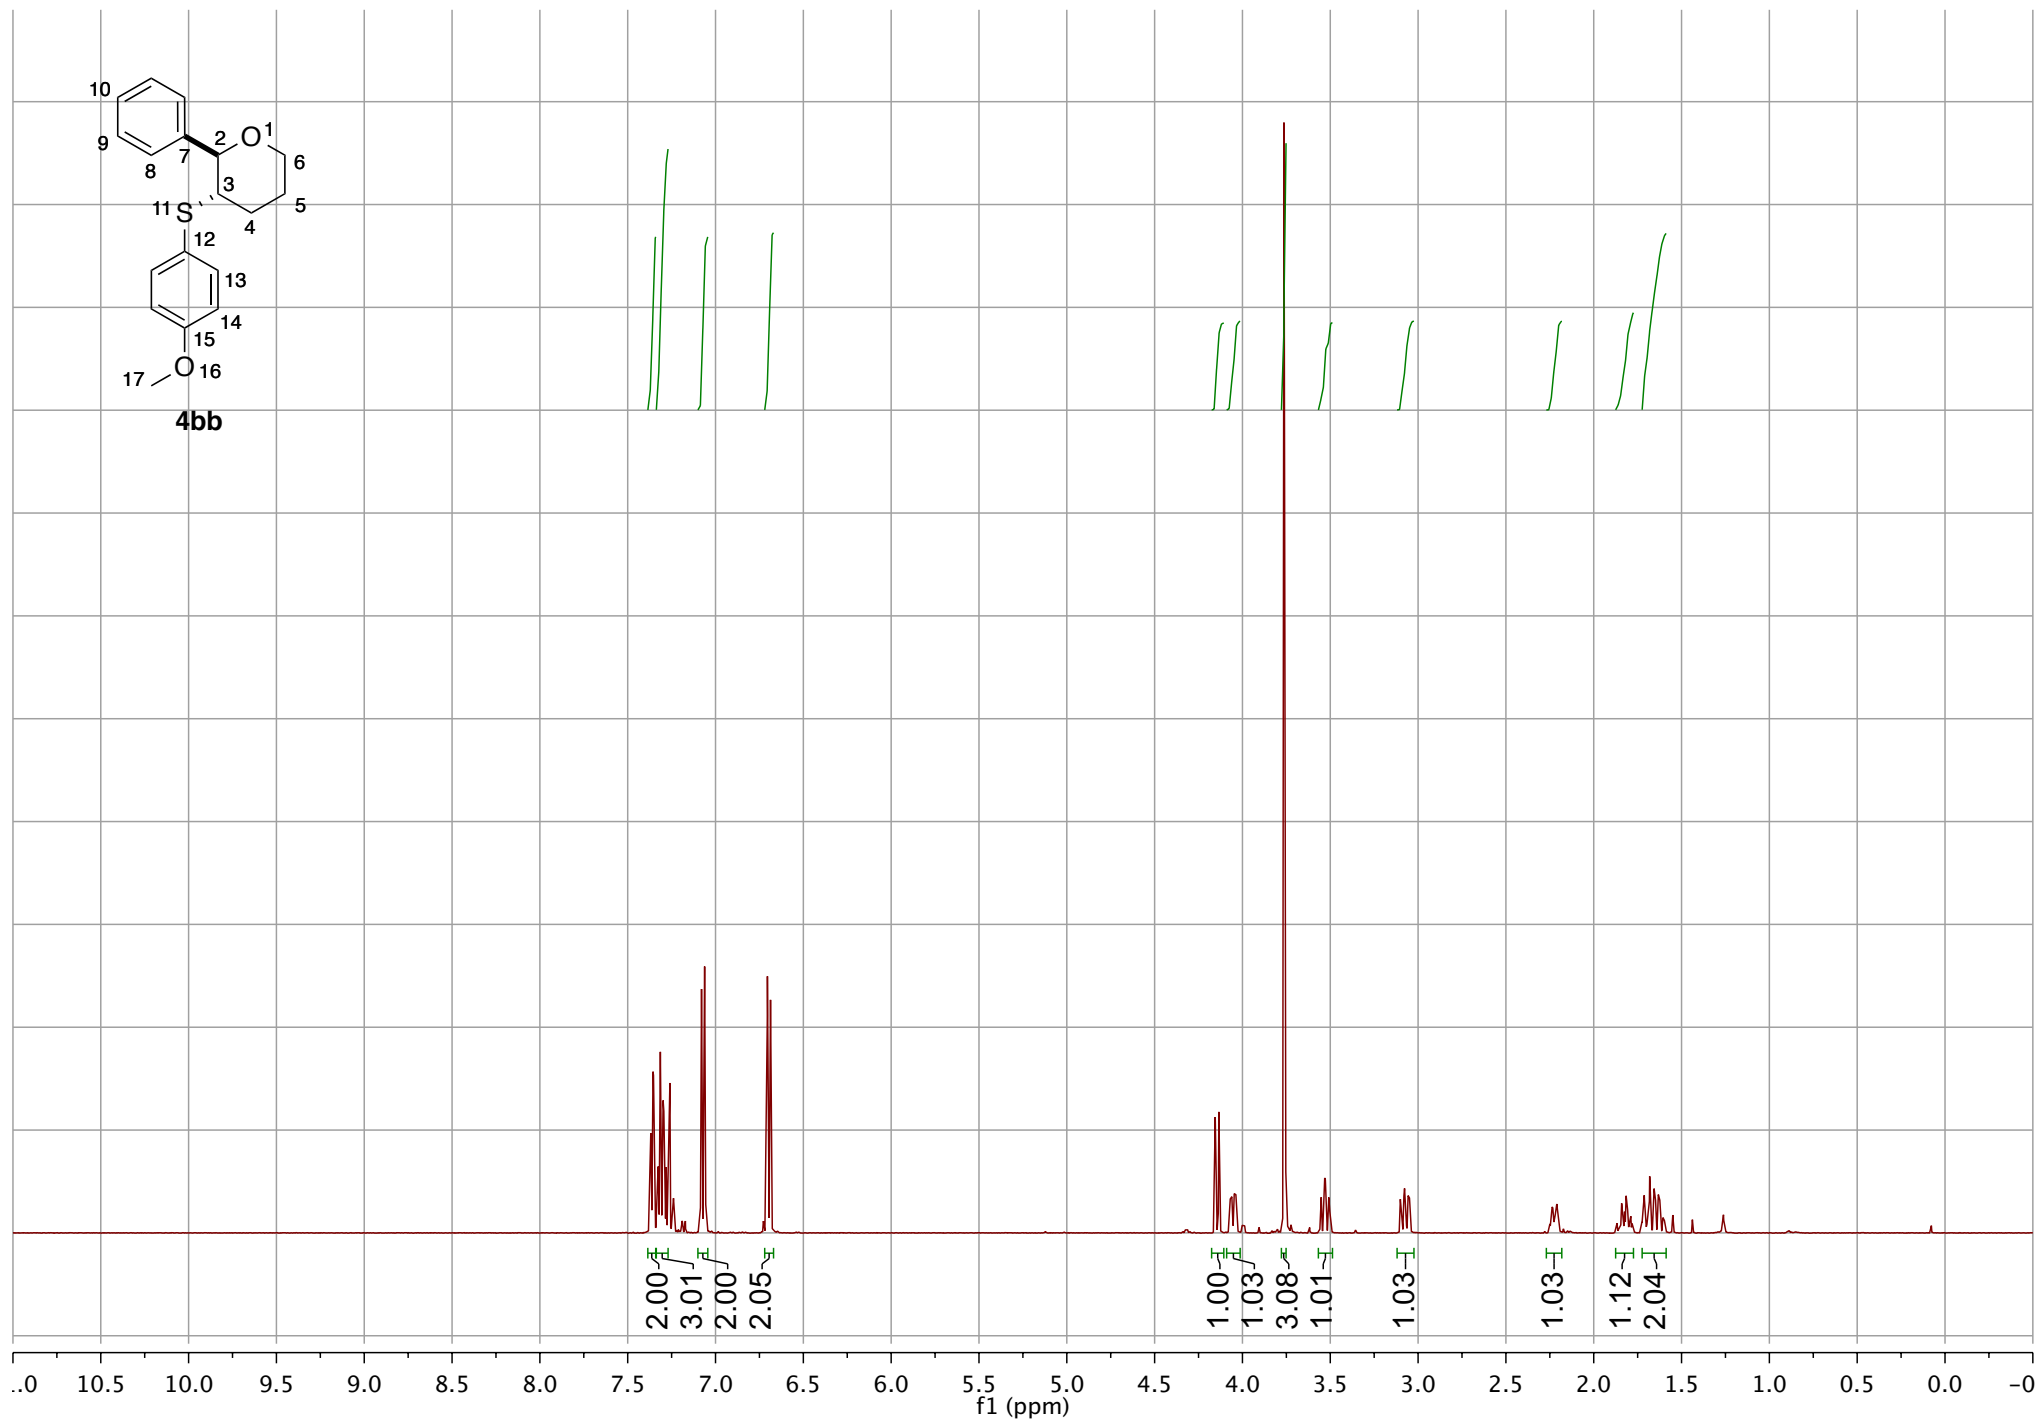

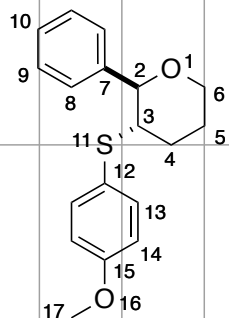

**4bb**

- 159.4
- 140.1
- 136.1
- 128.2
- 127.8
- 123.7
- 114.1
- 85.1
- 68.5
- 55.2
- 51.2
- 32.2
- 27.1

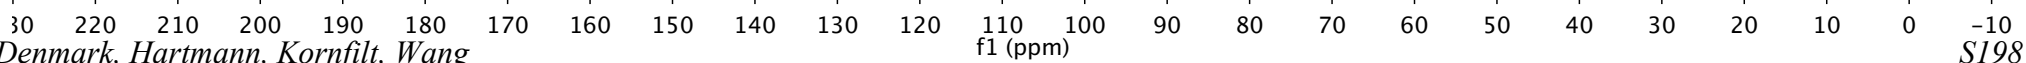

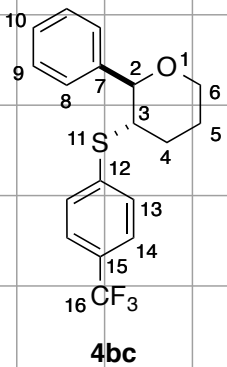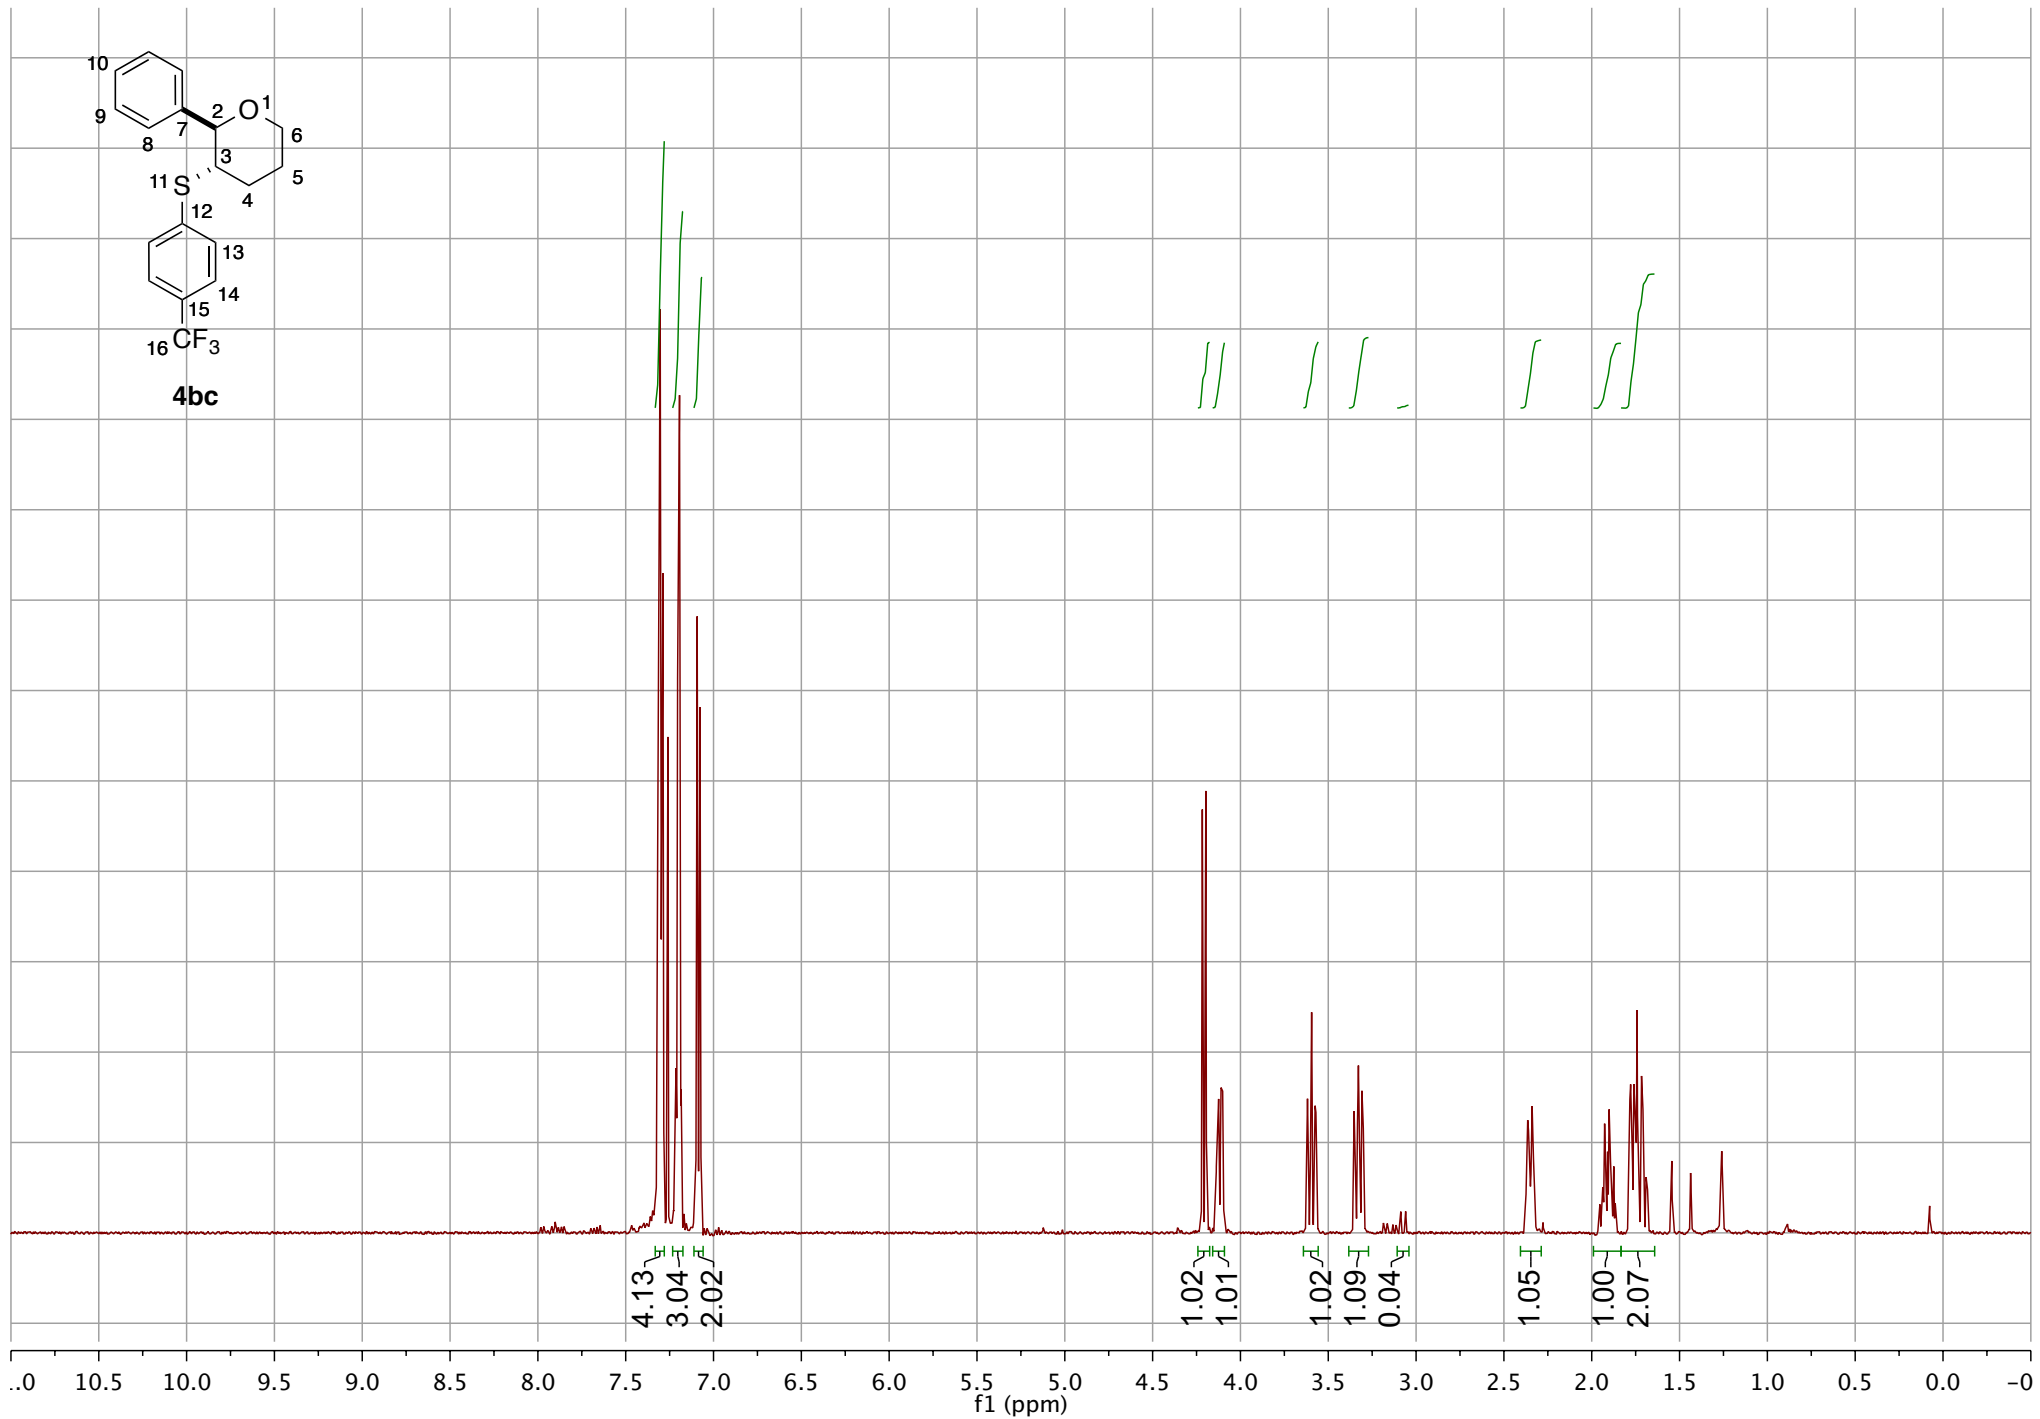

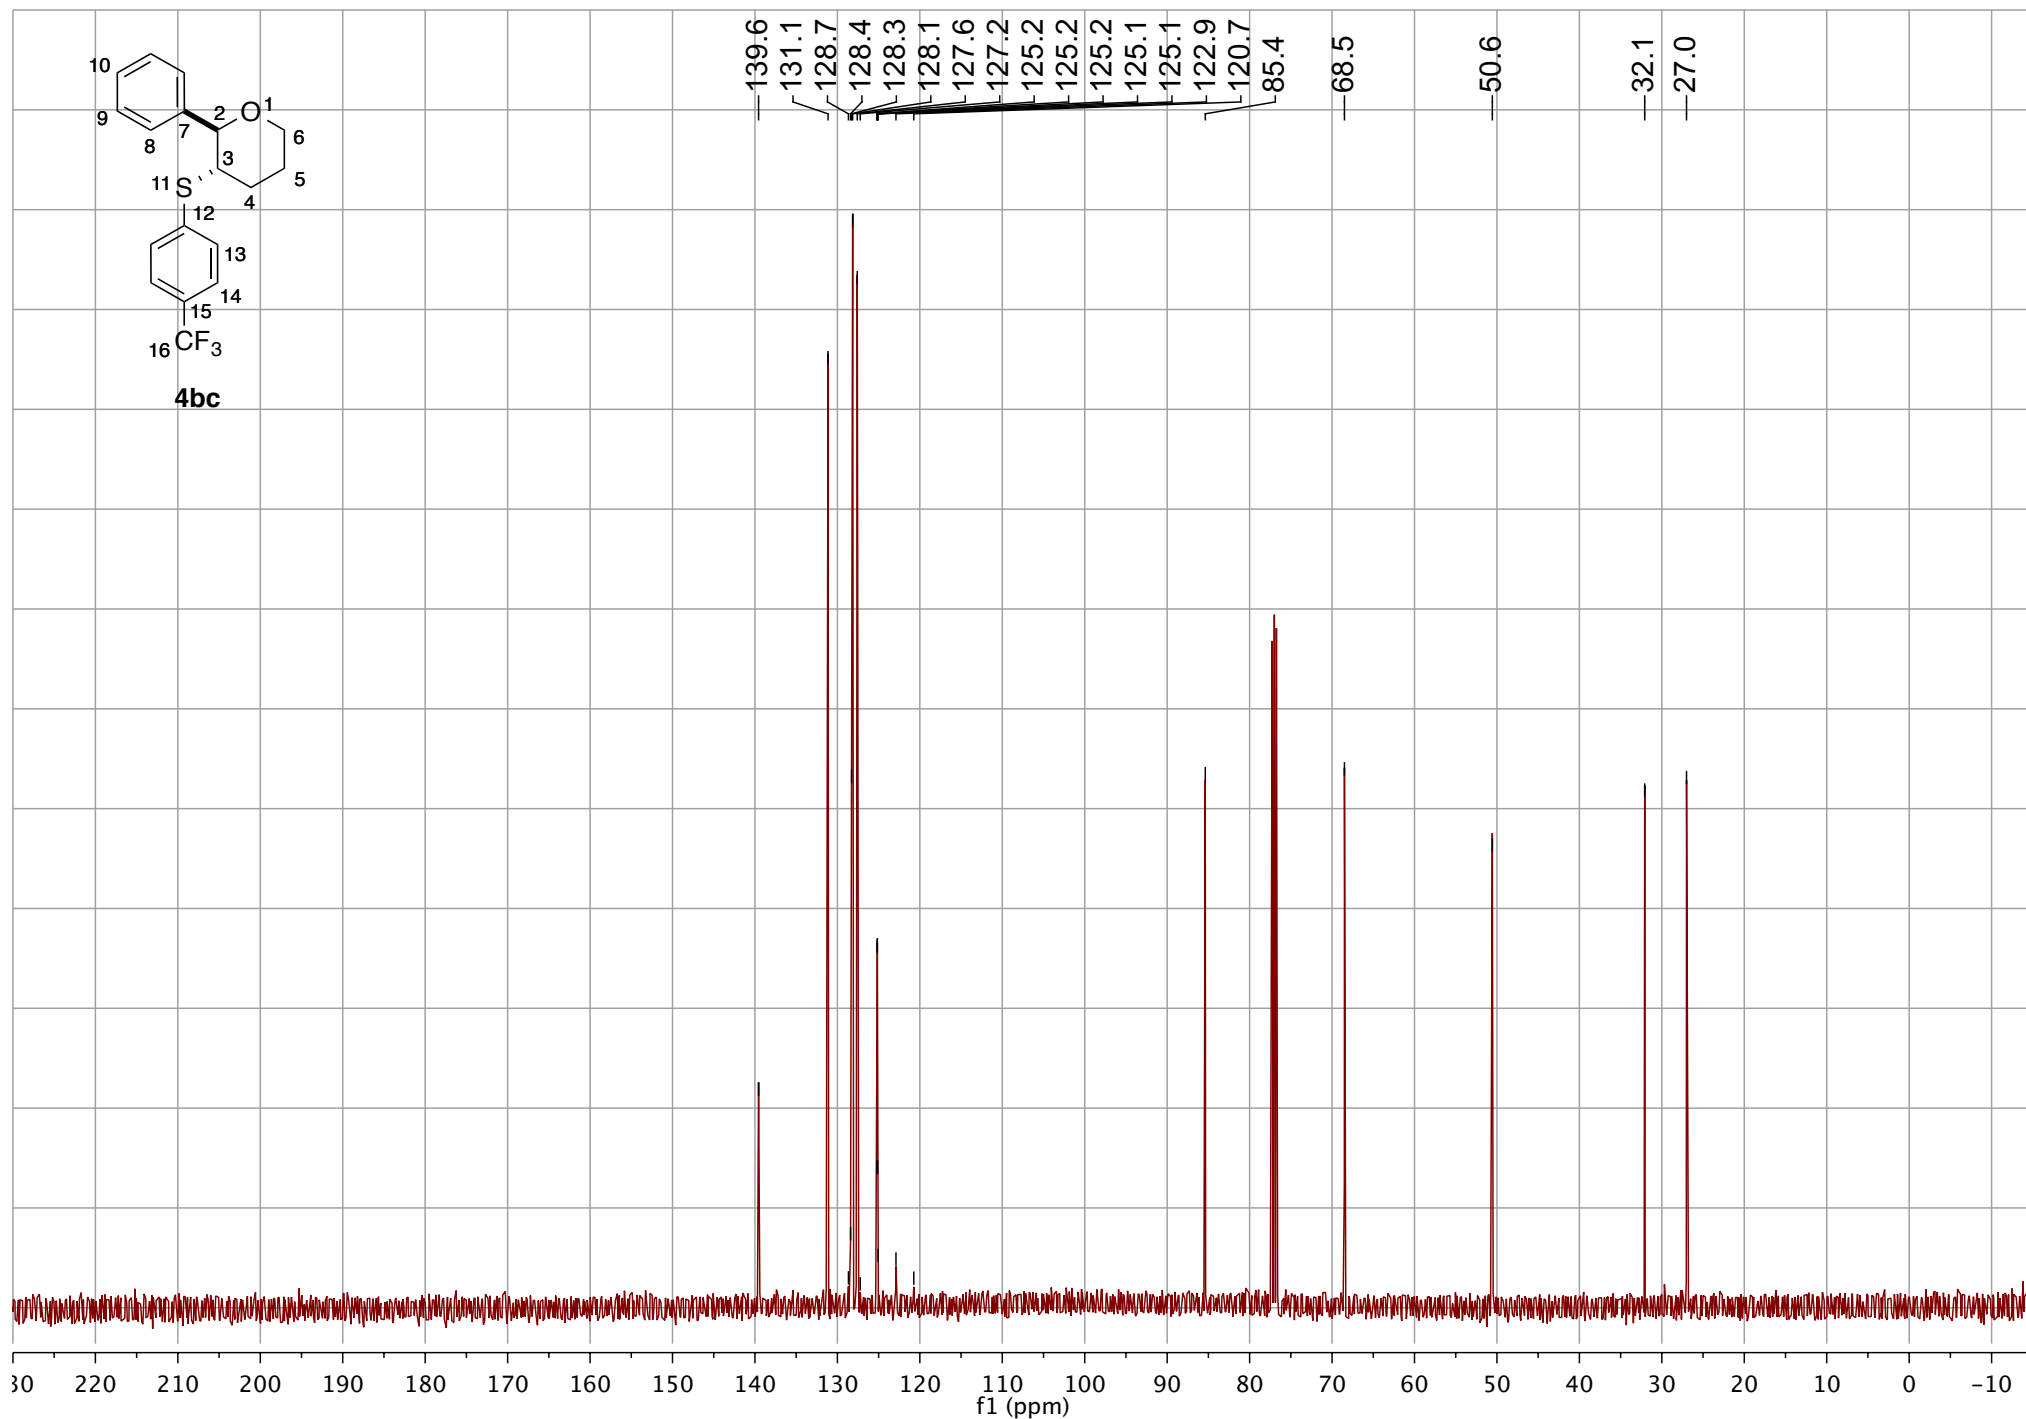



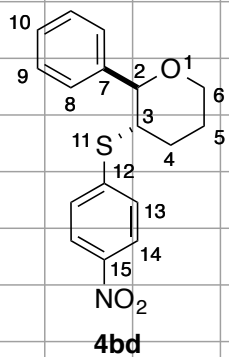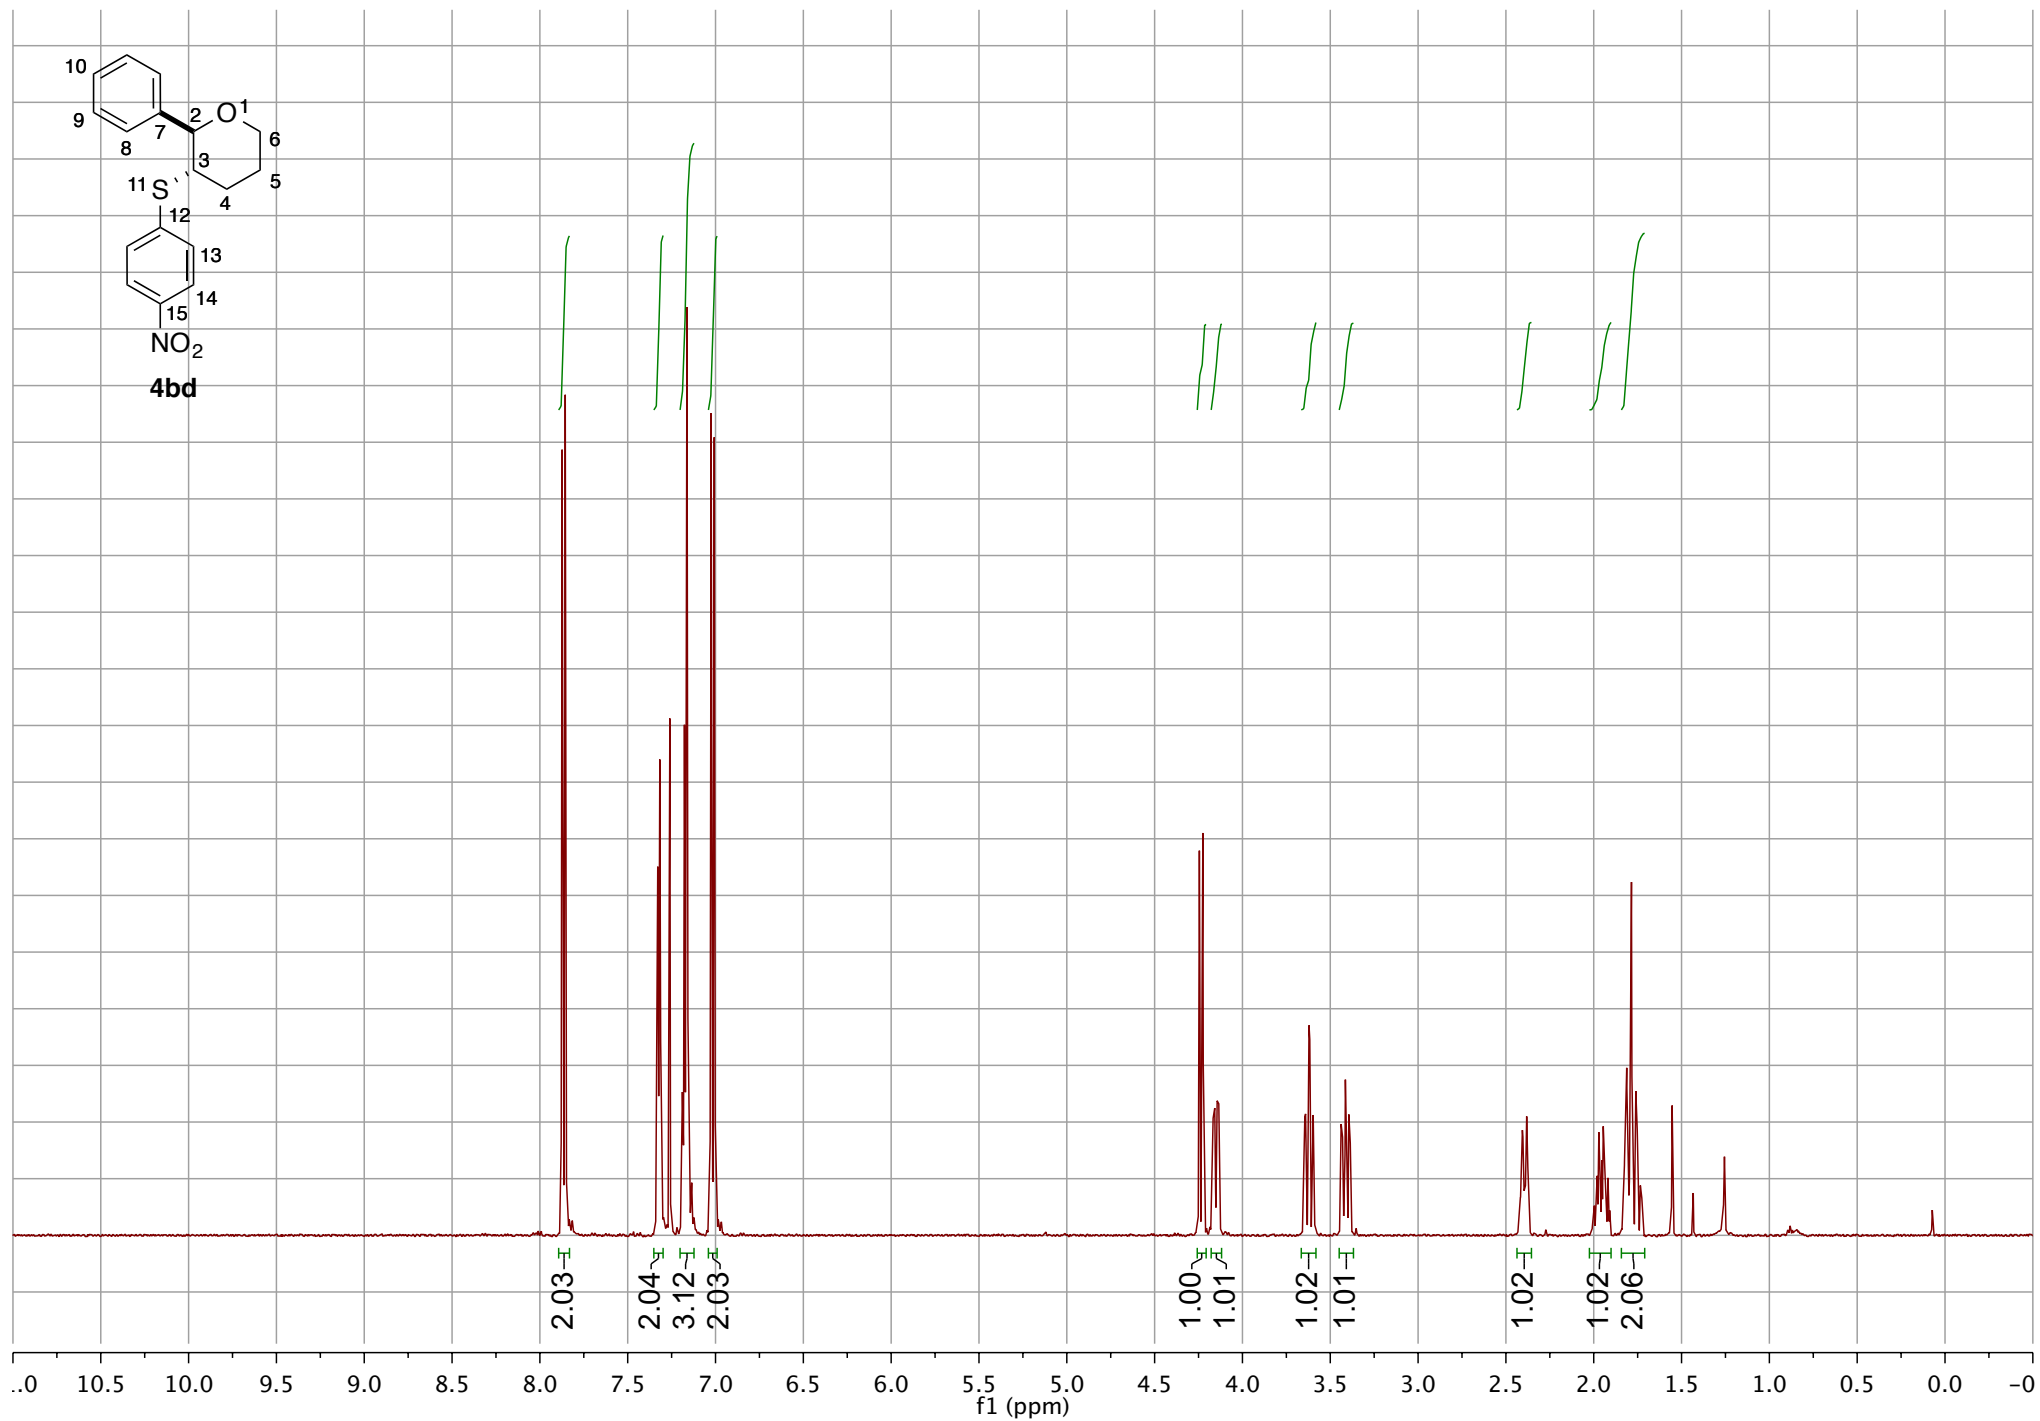

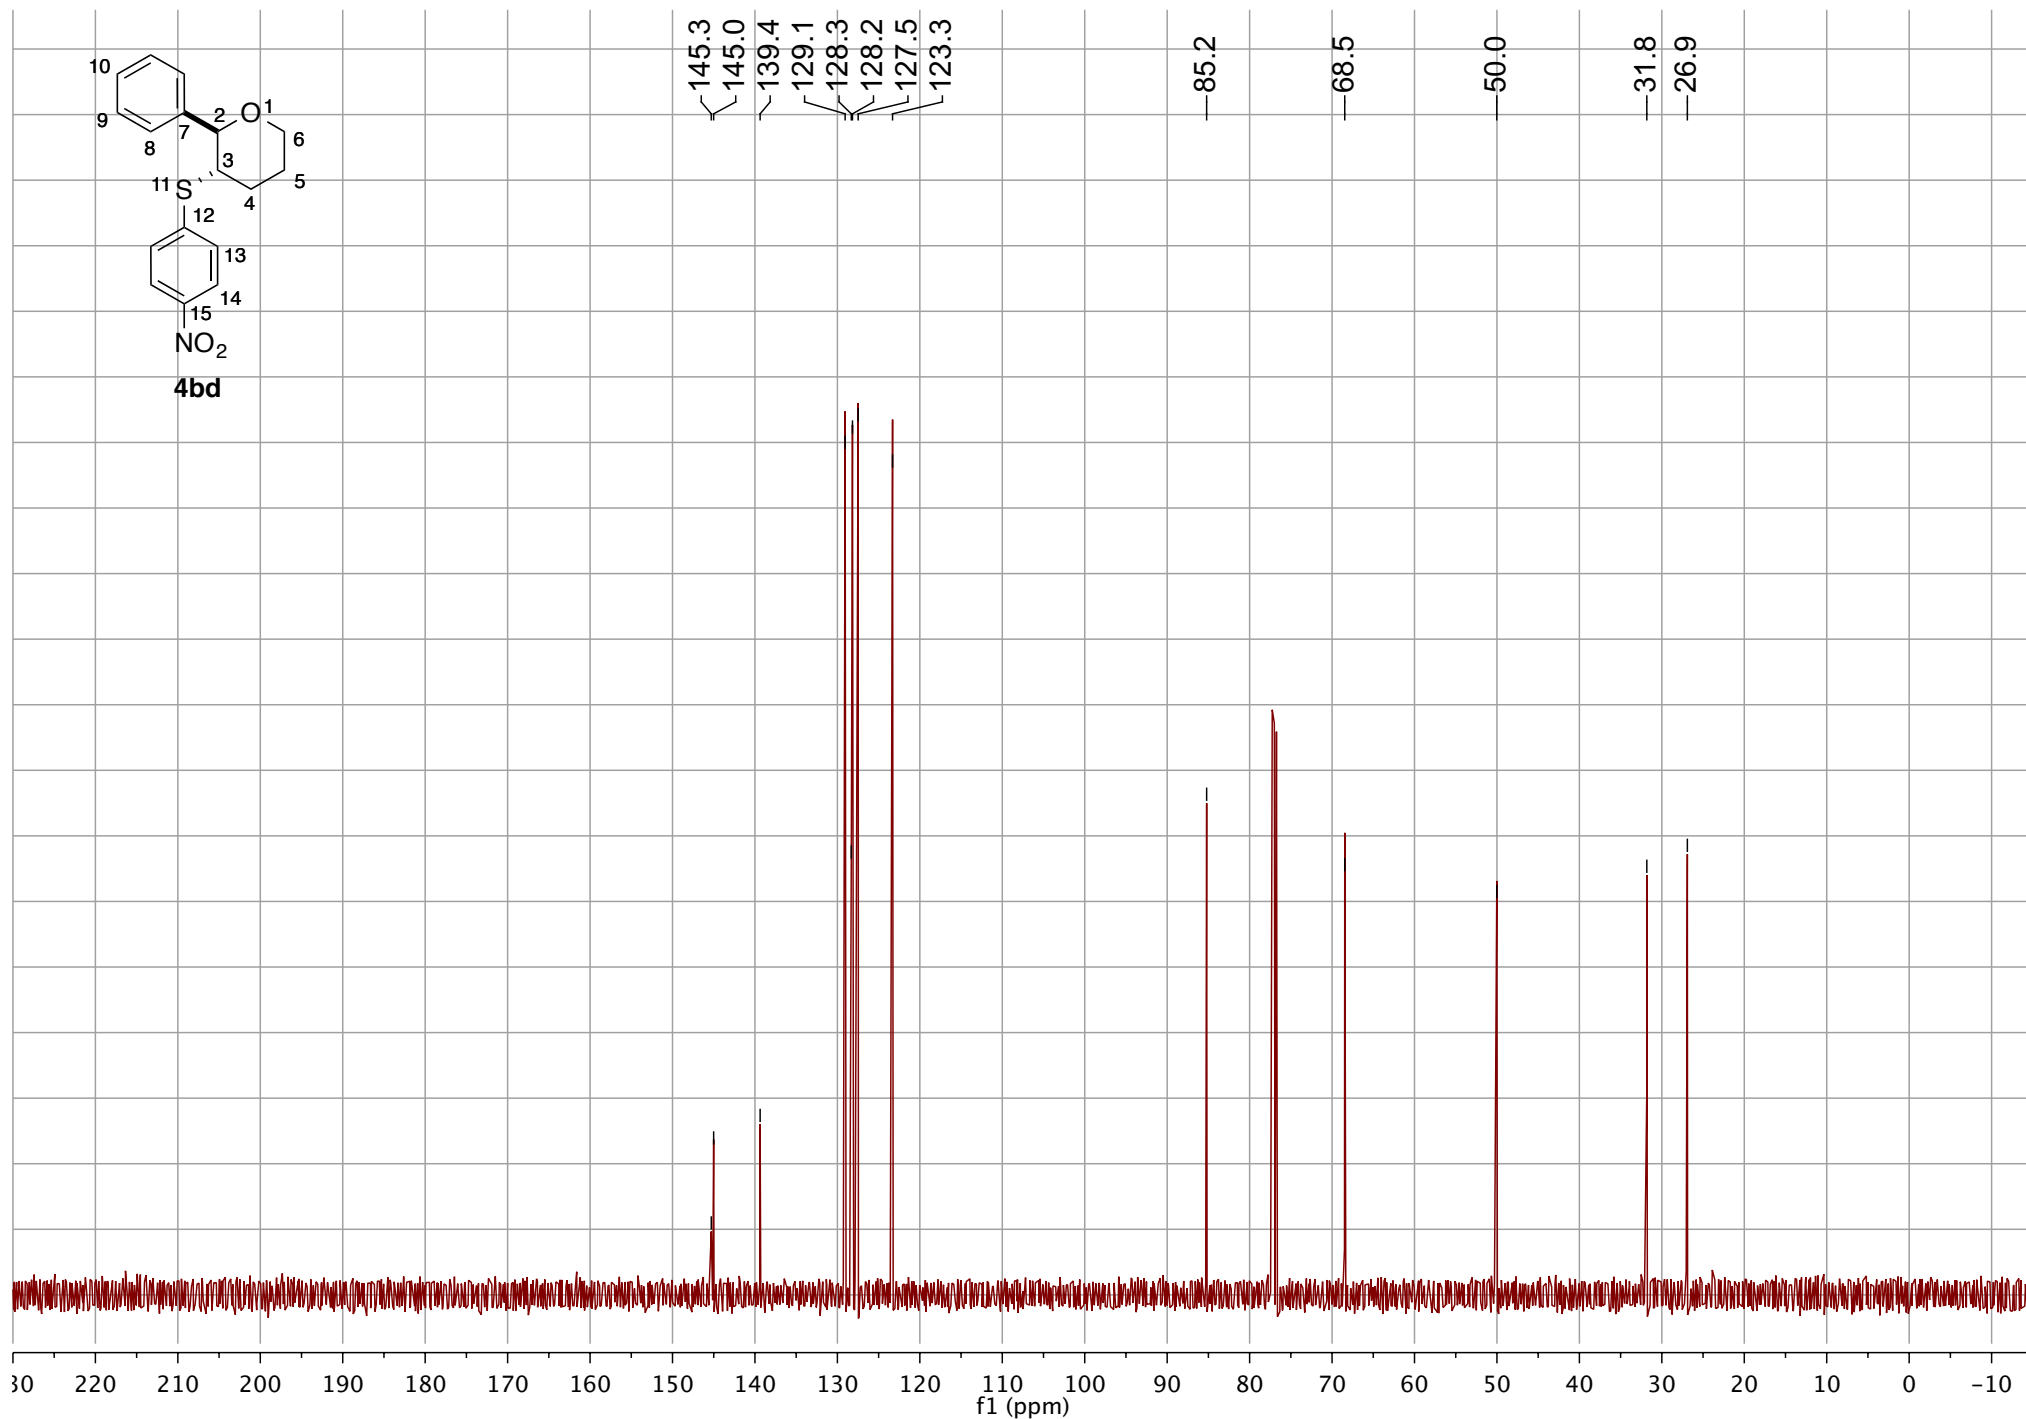

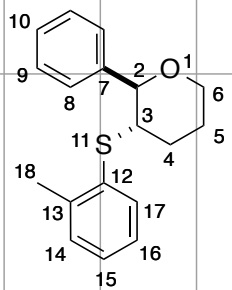

4be

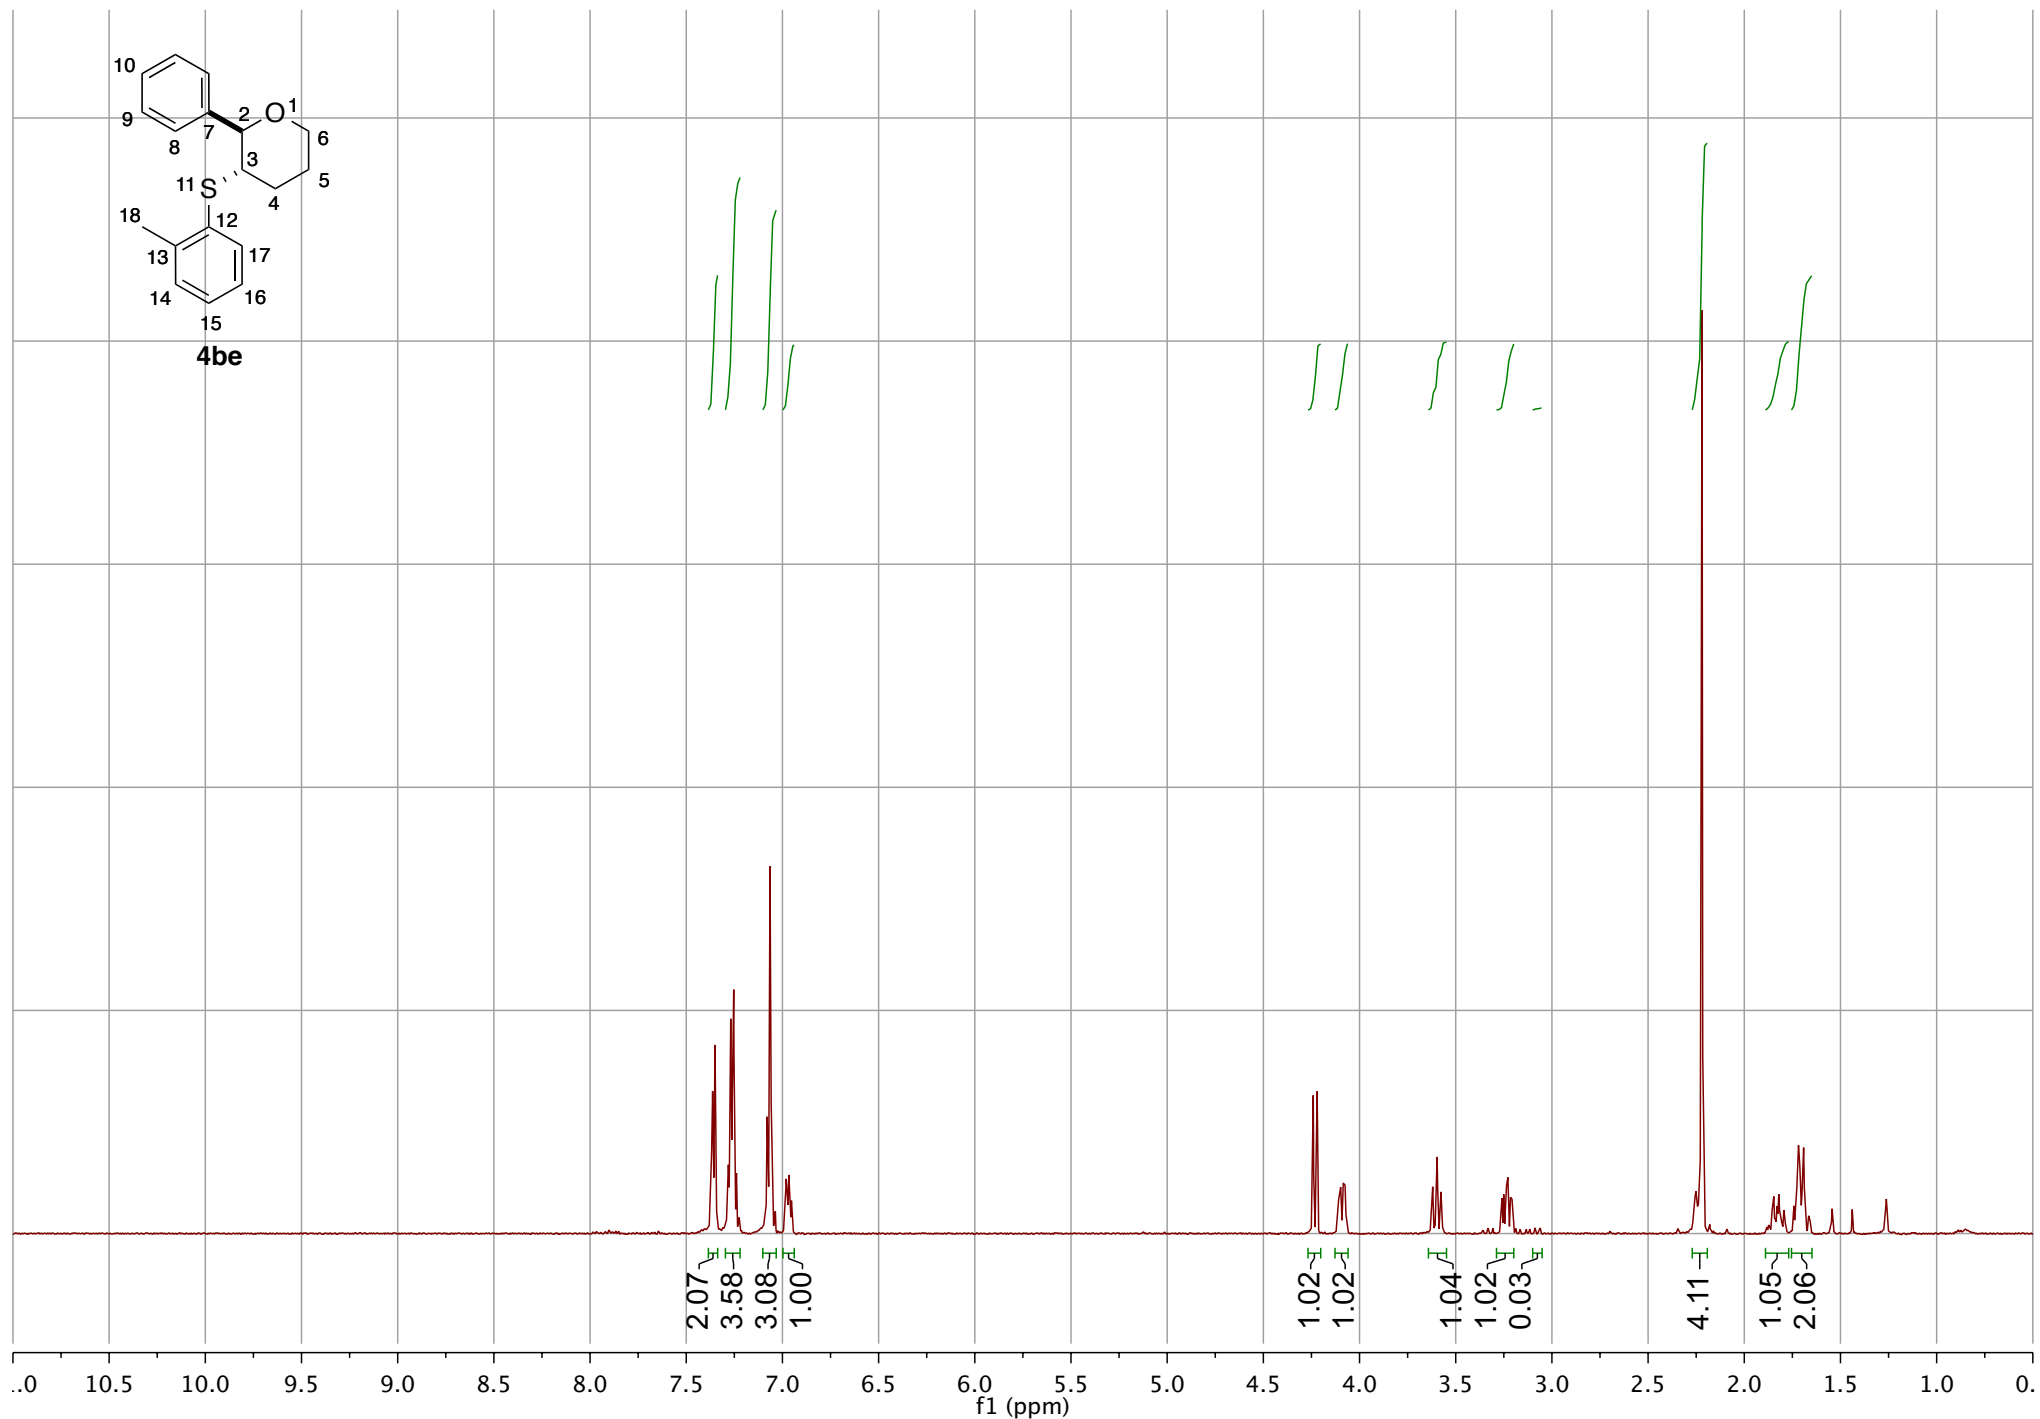

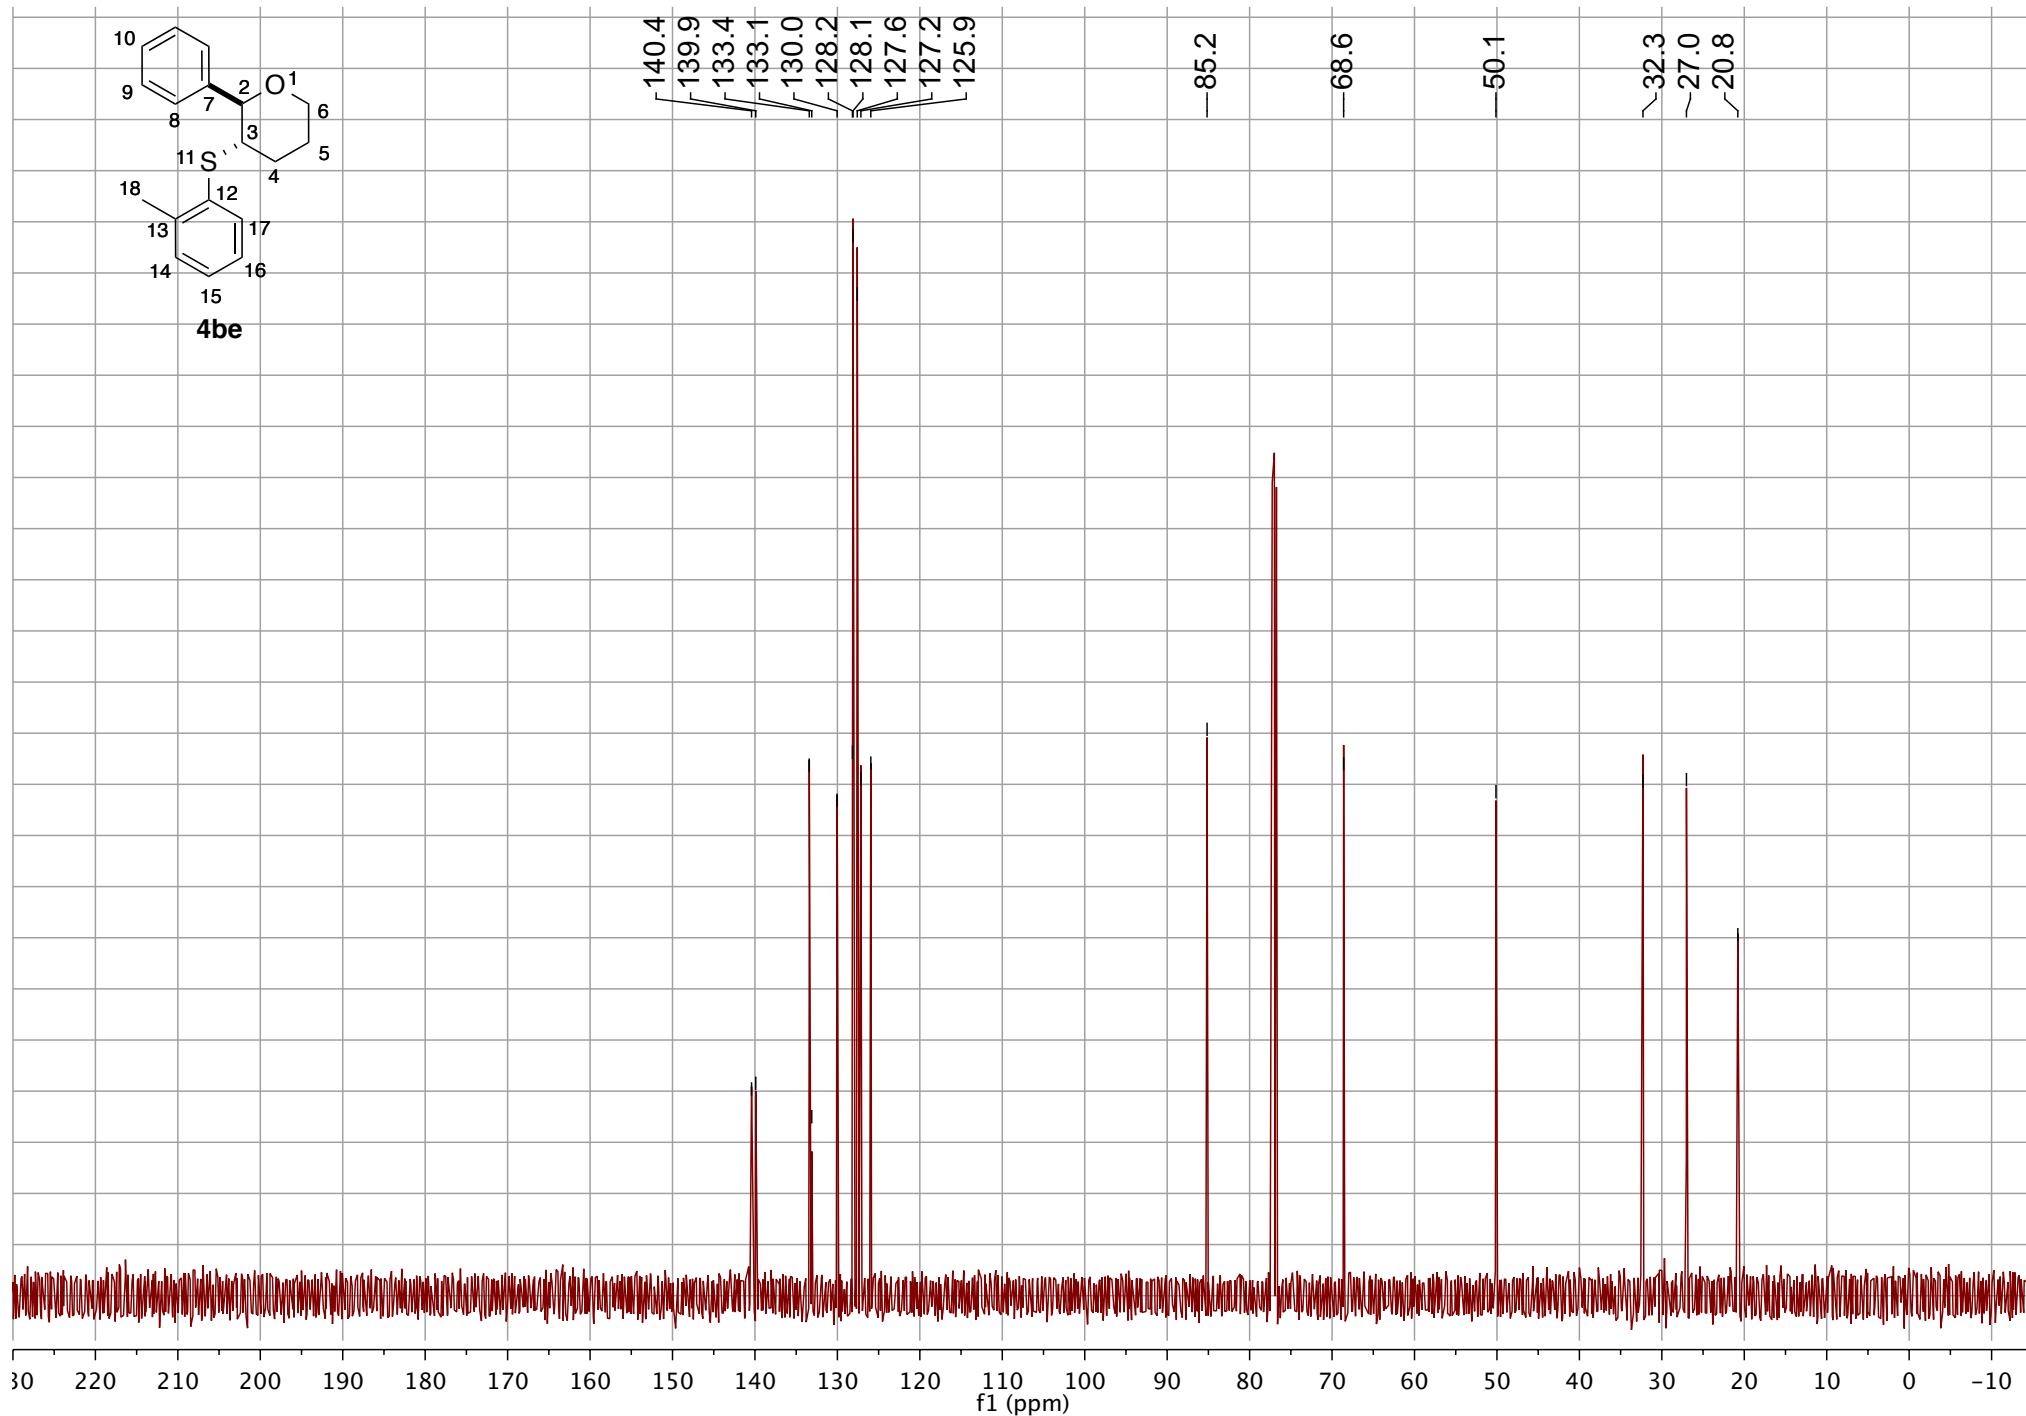

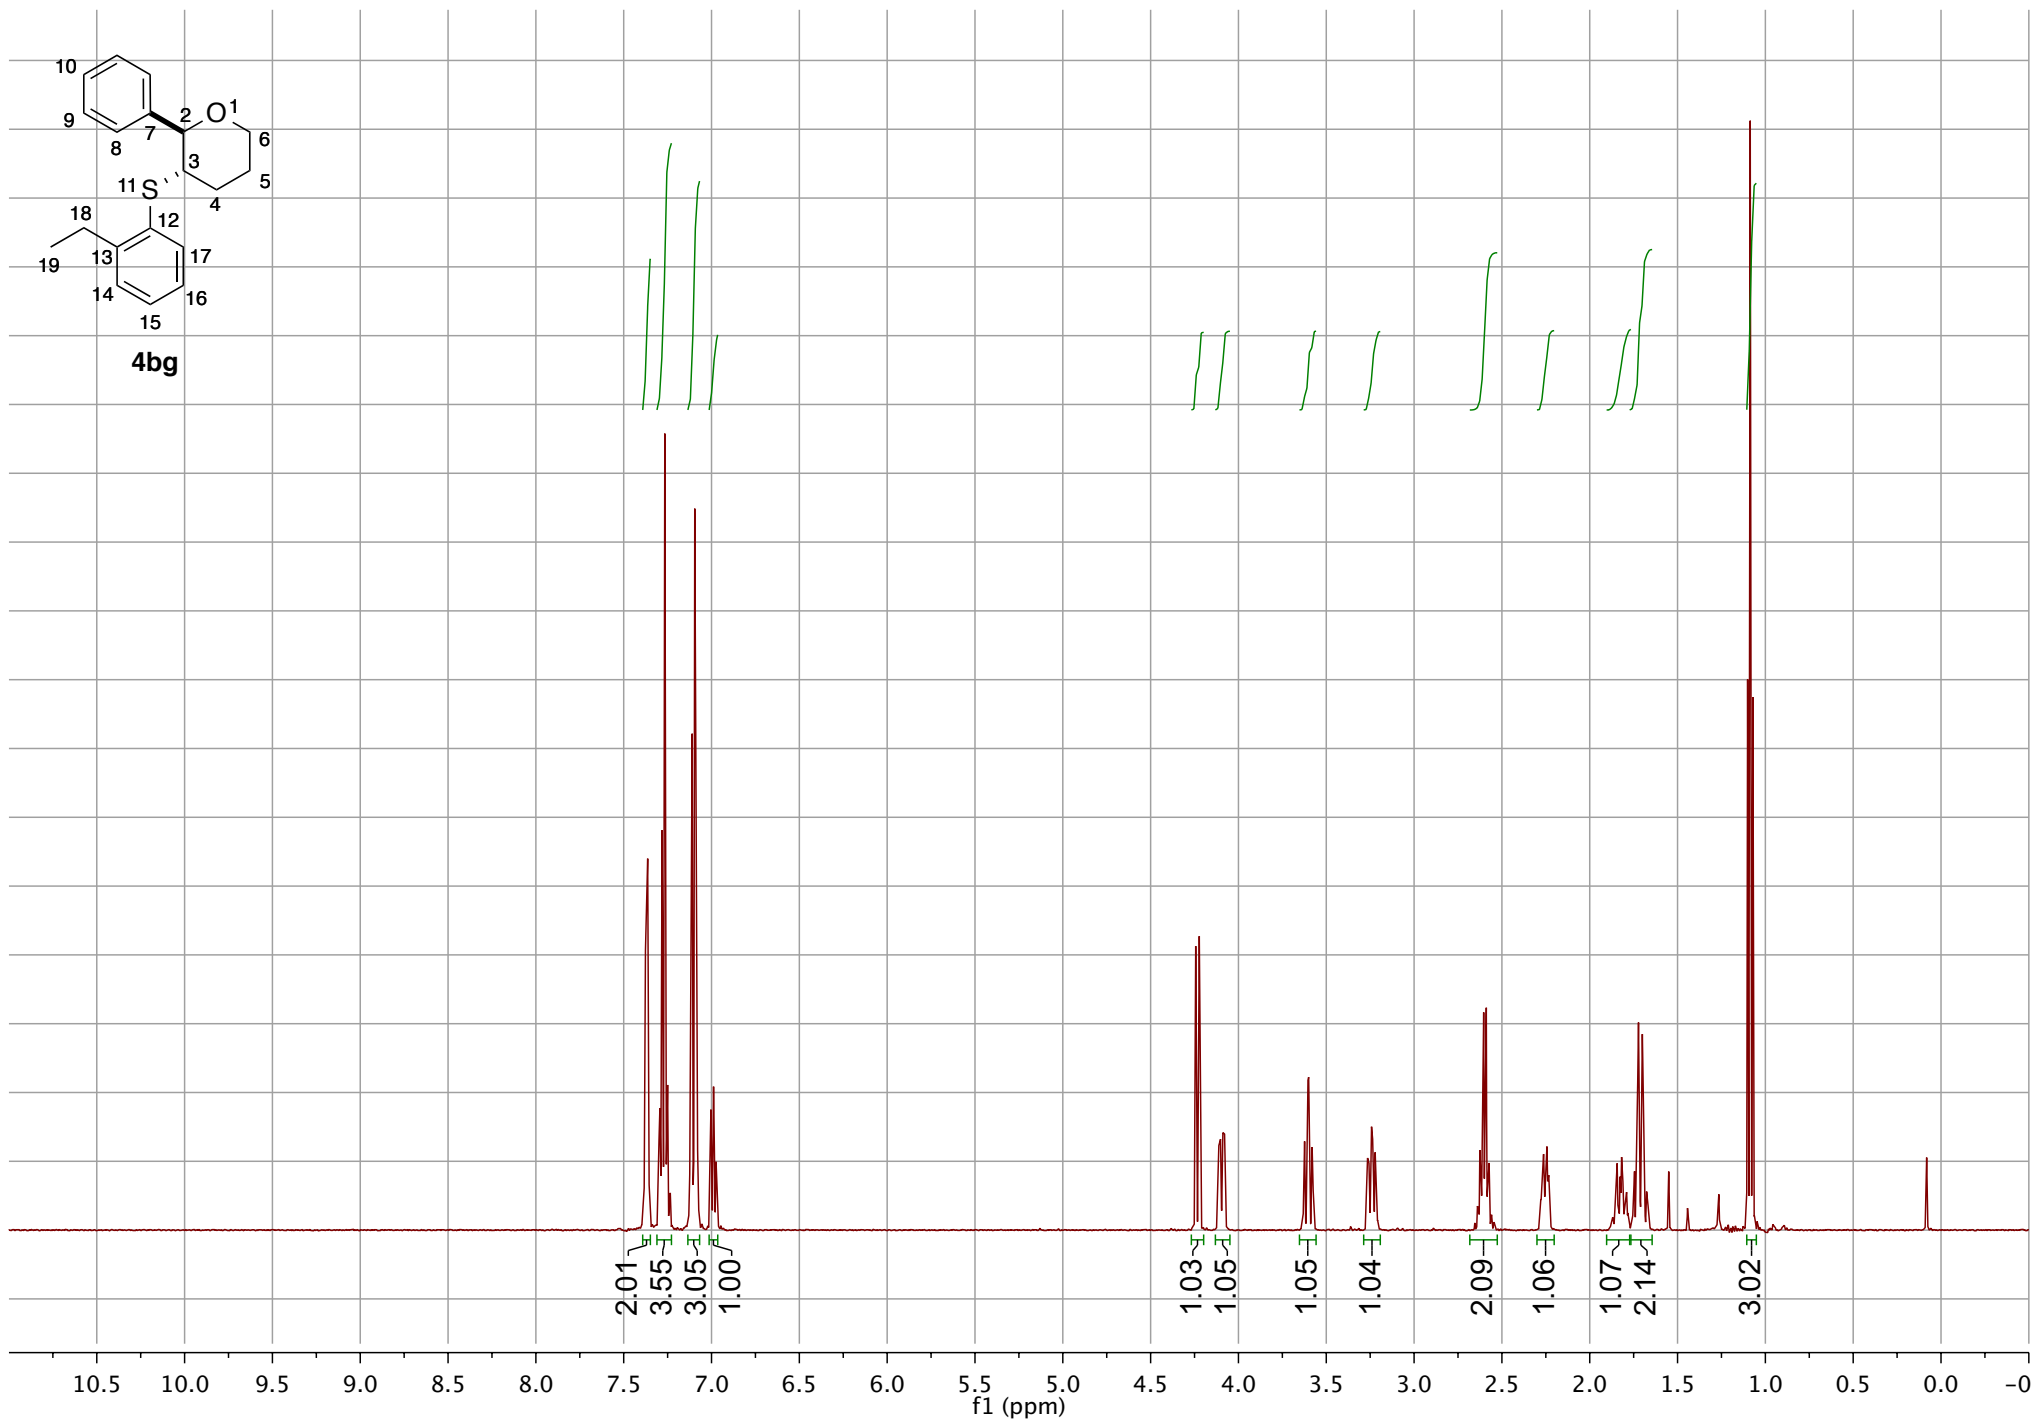

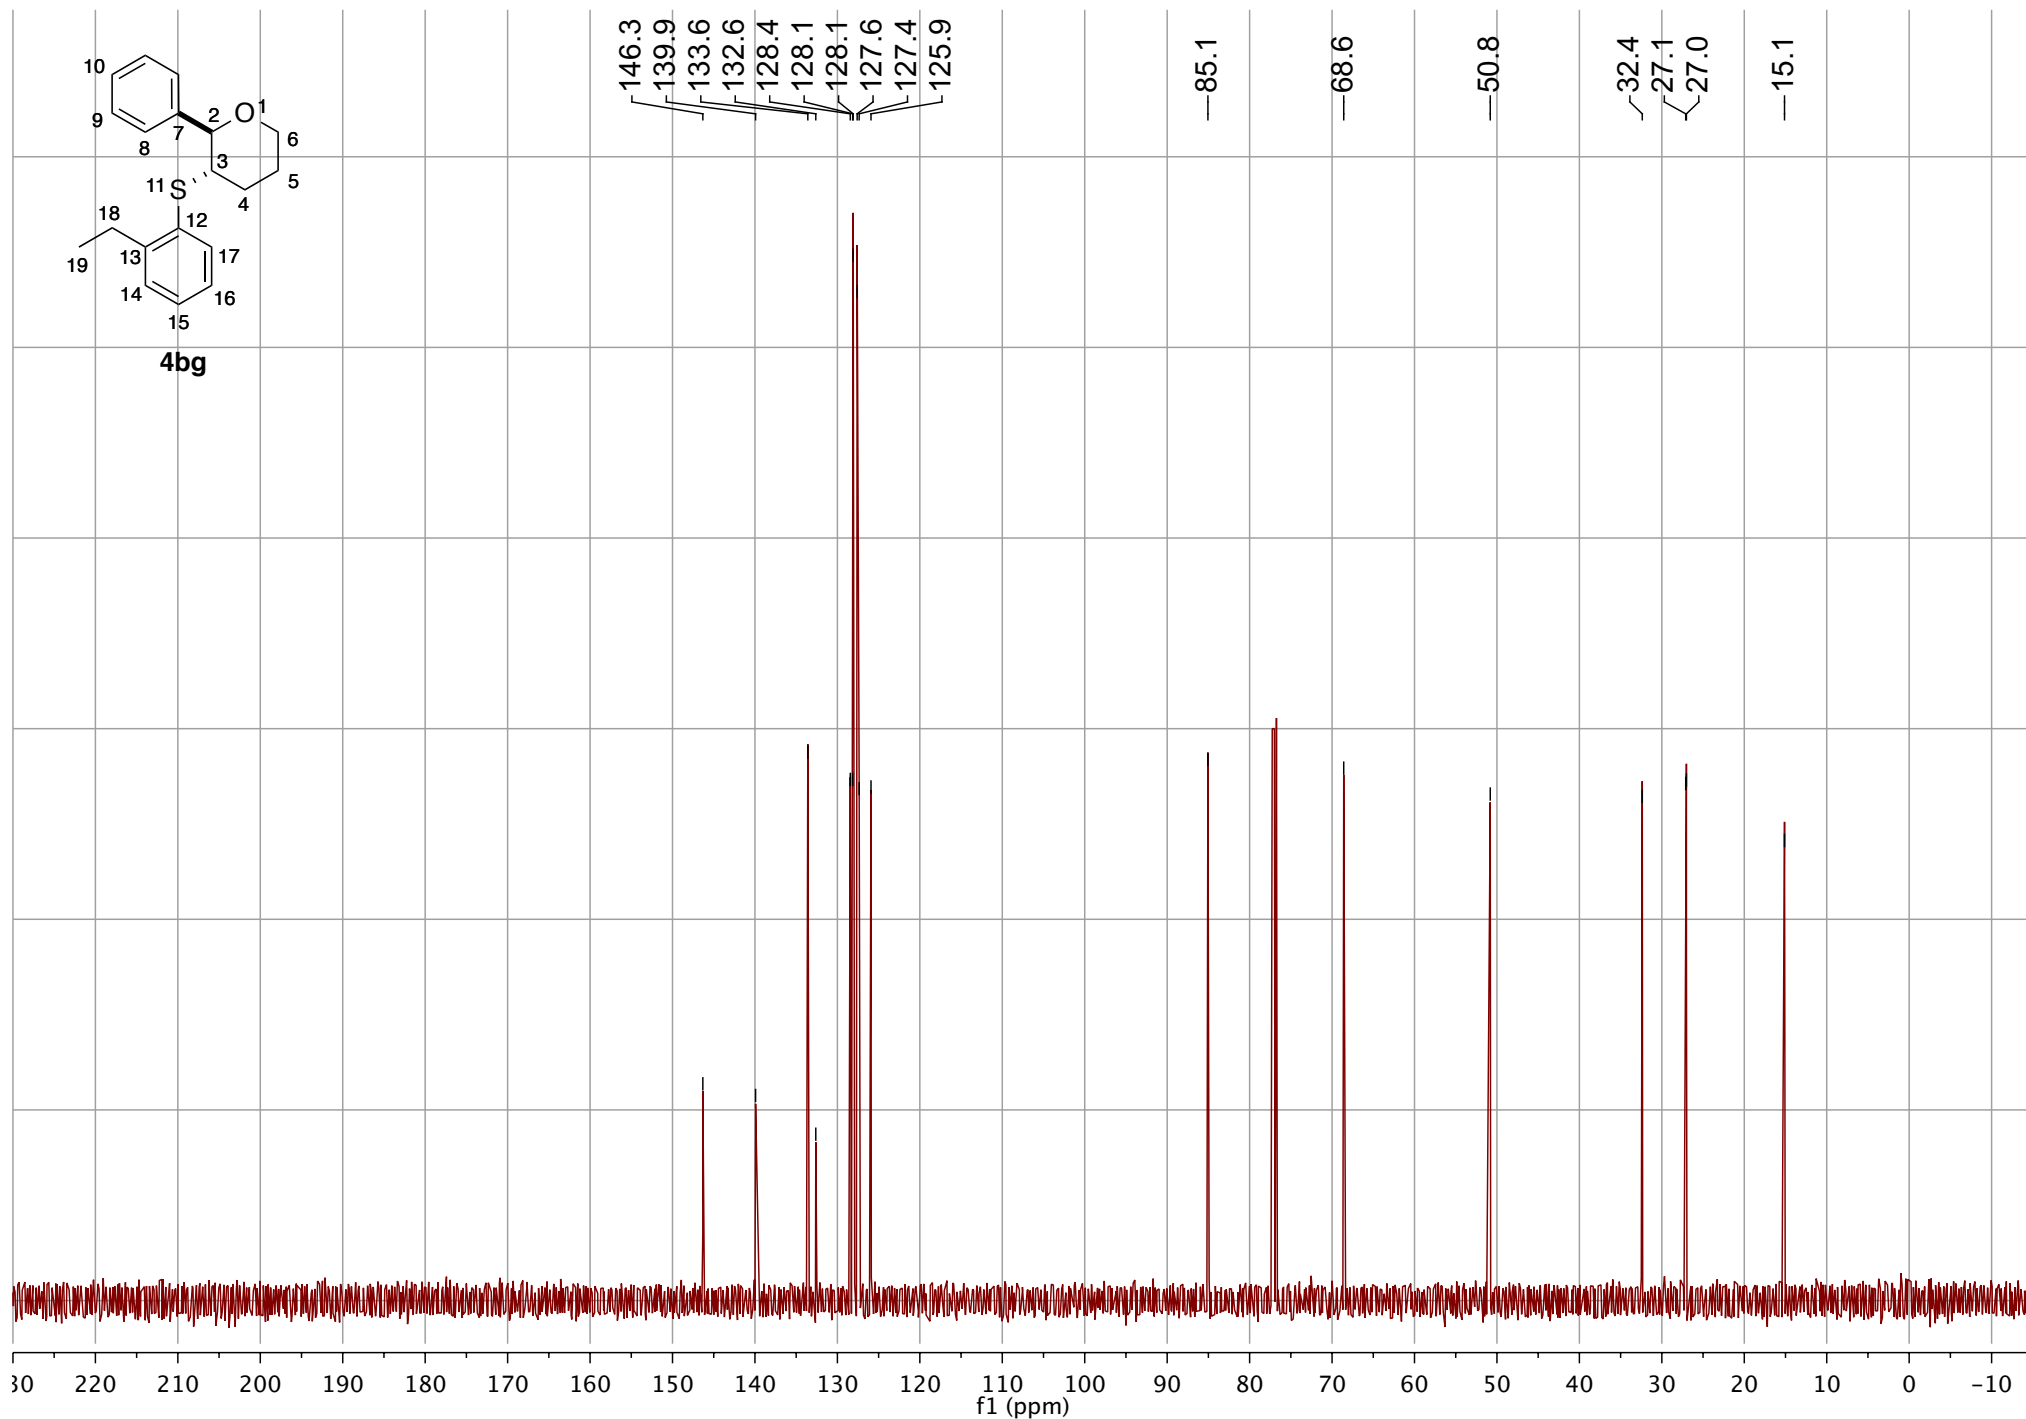

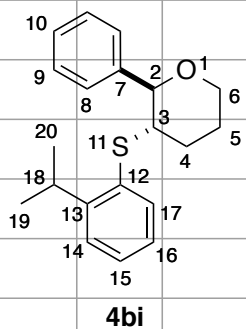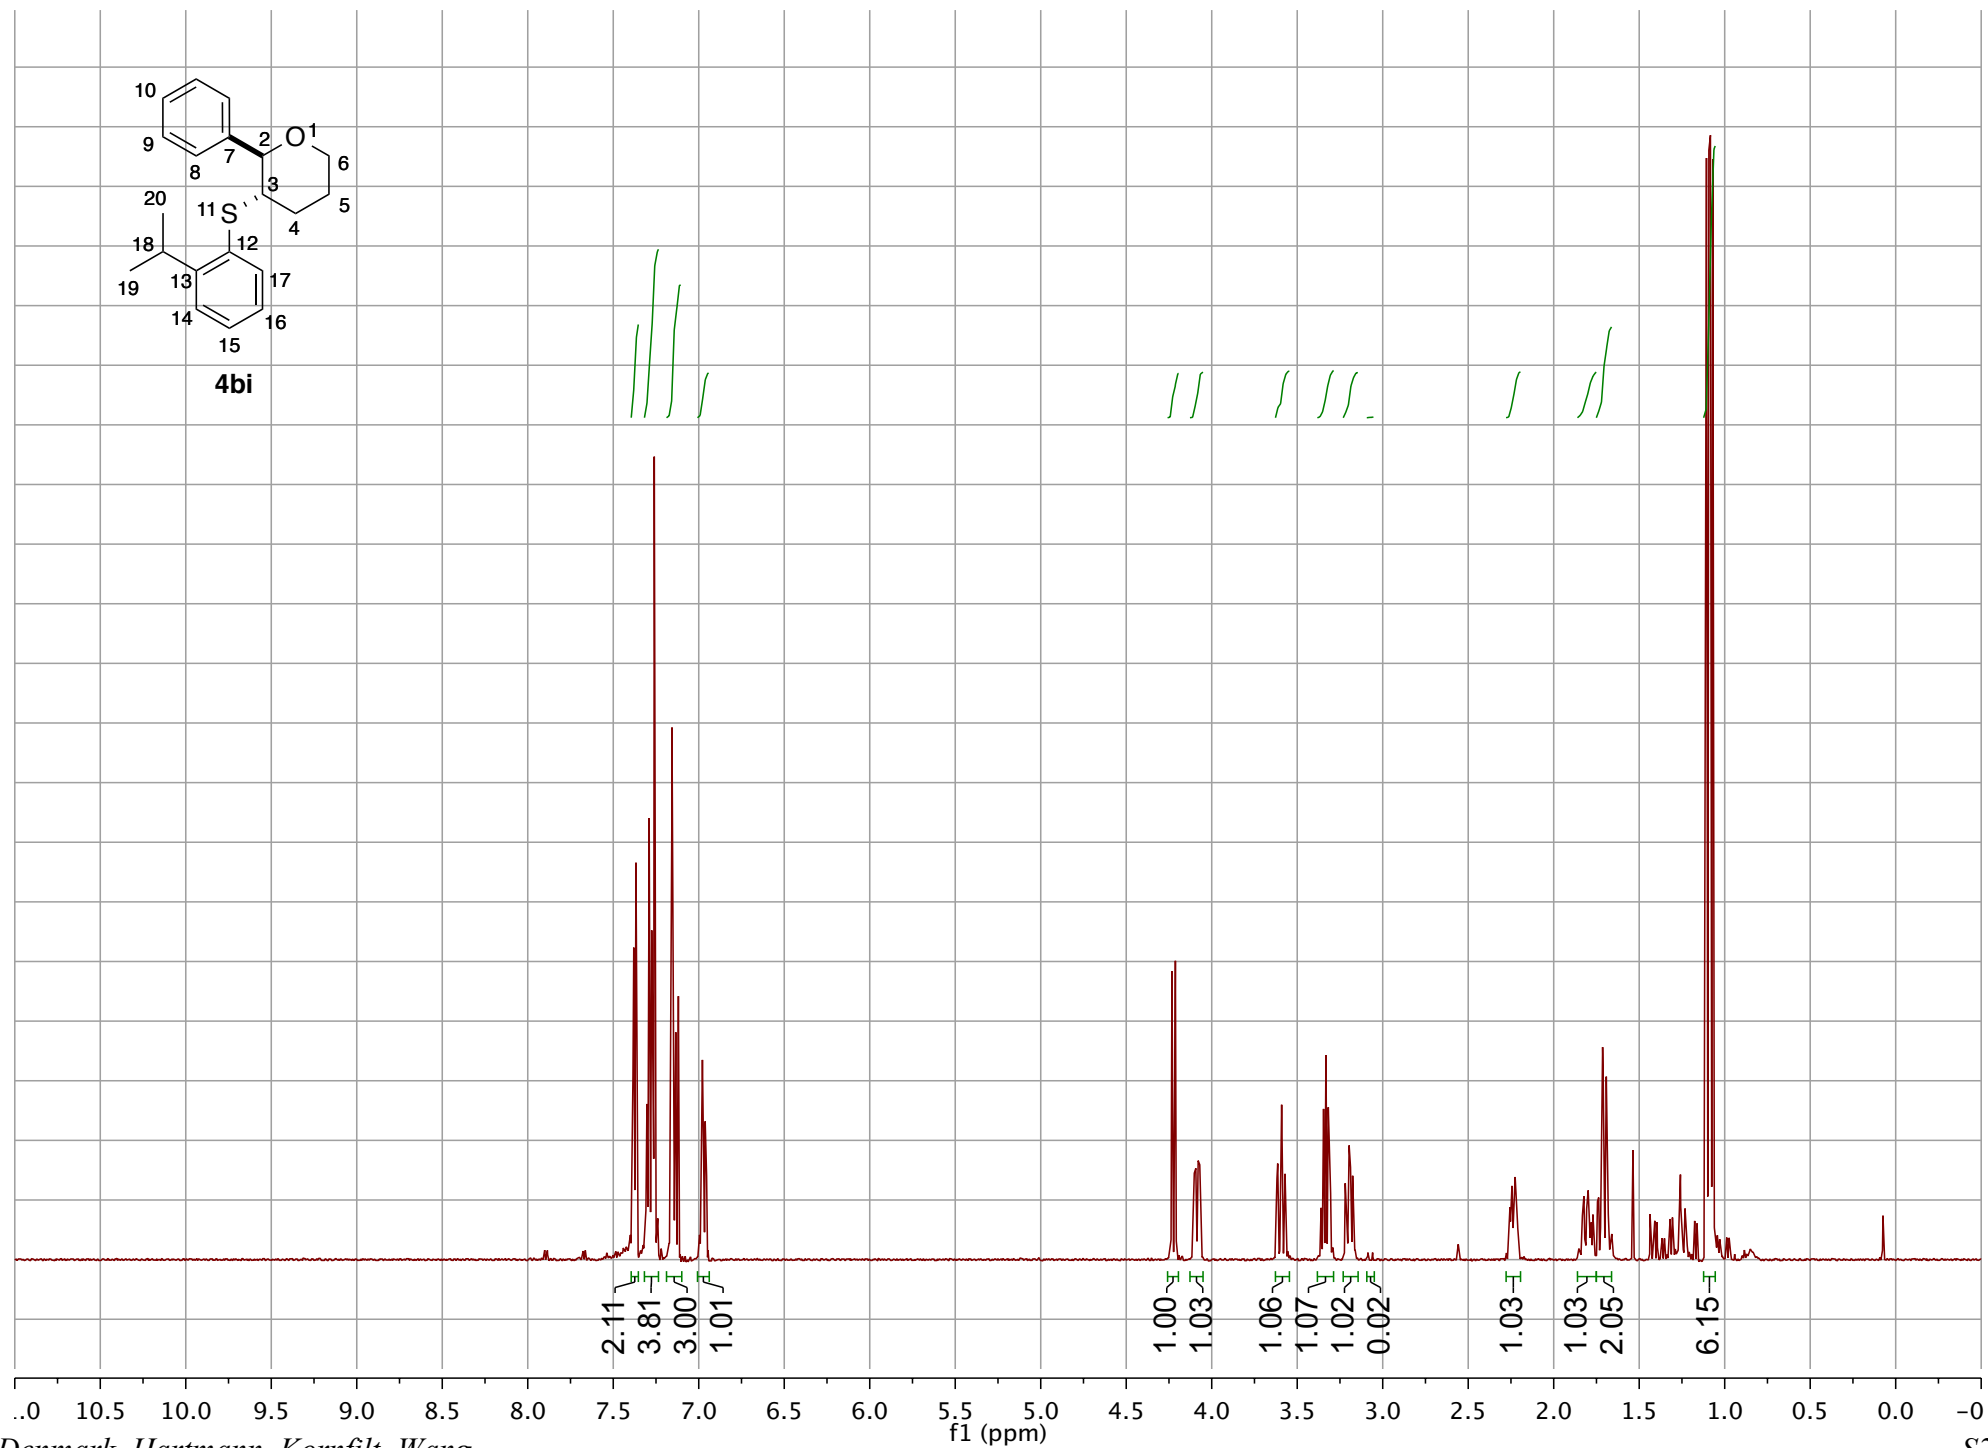

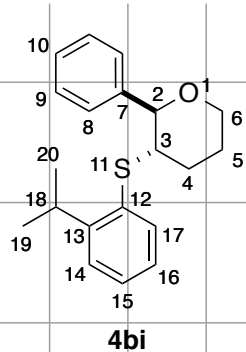

4bi

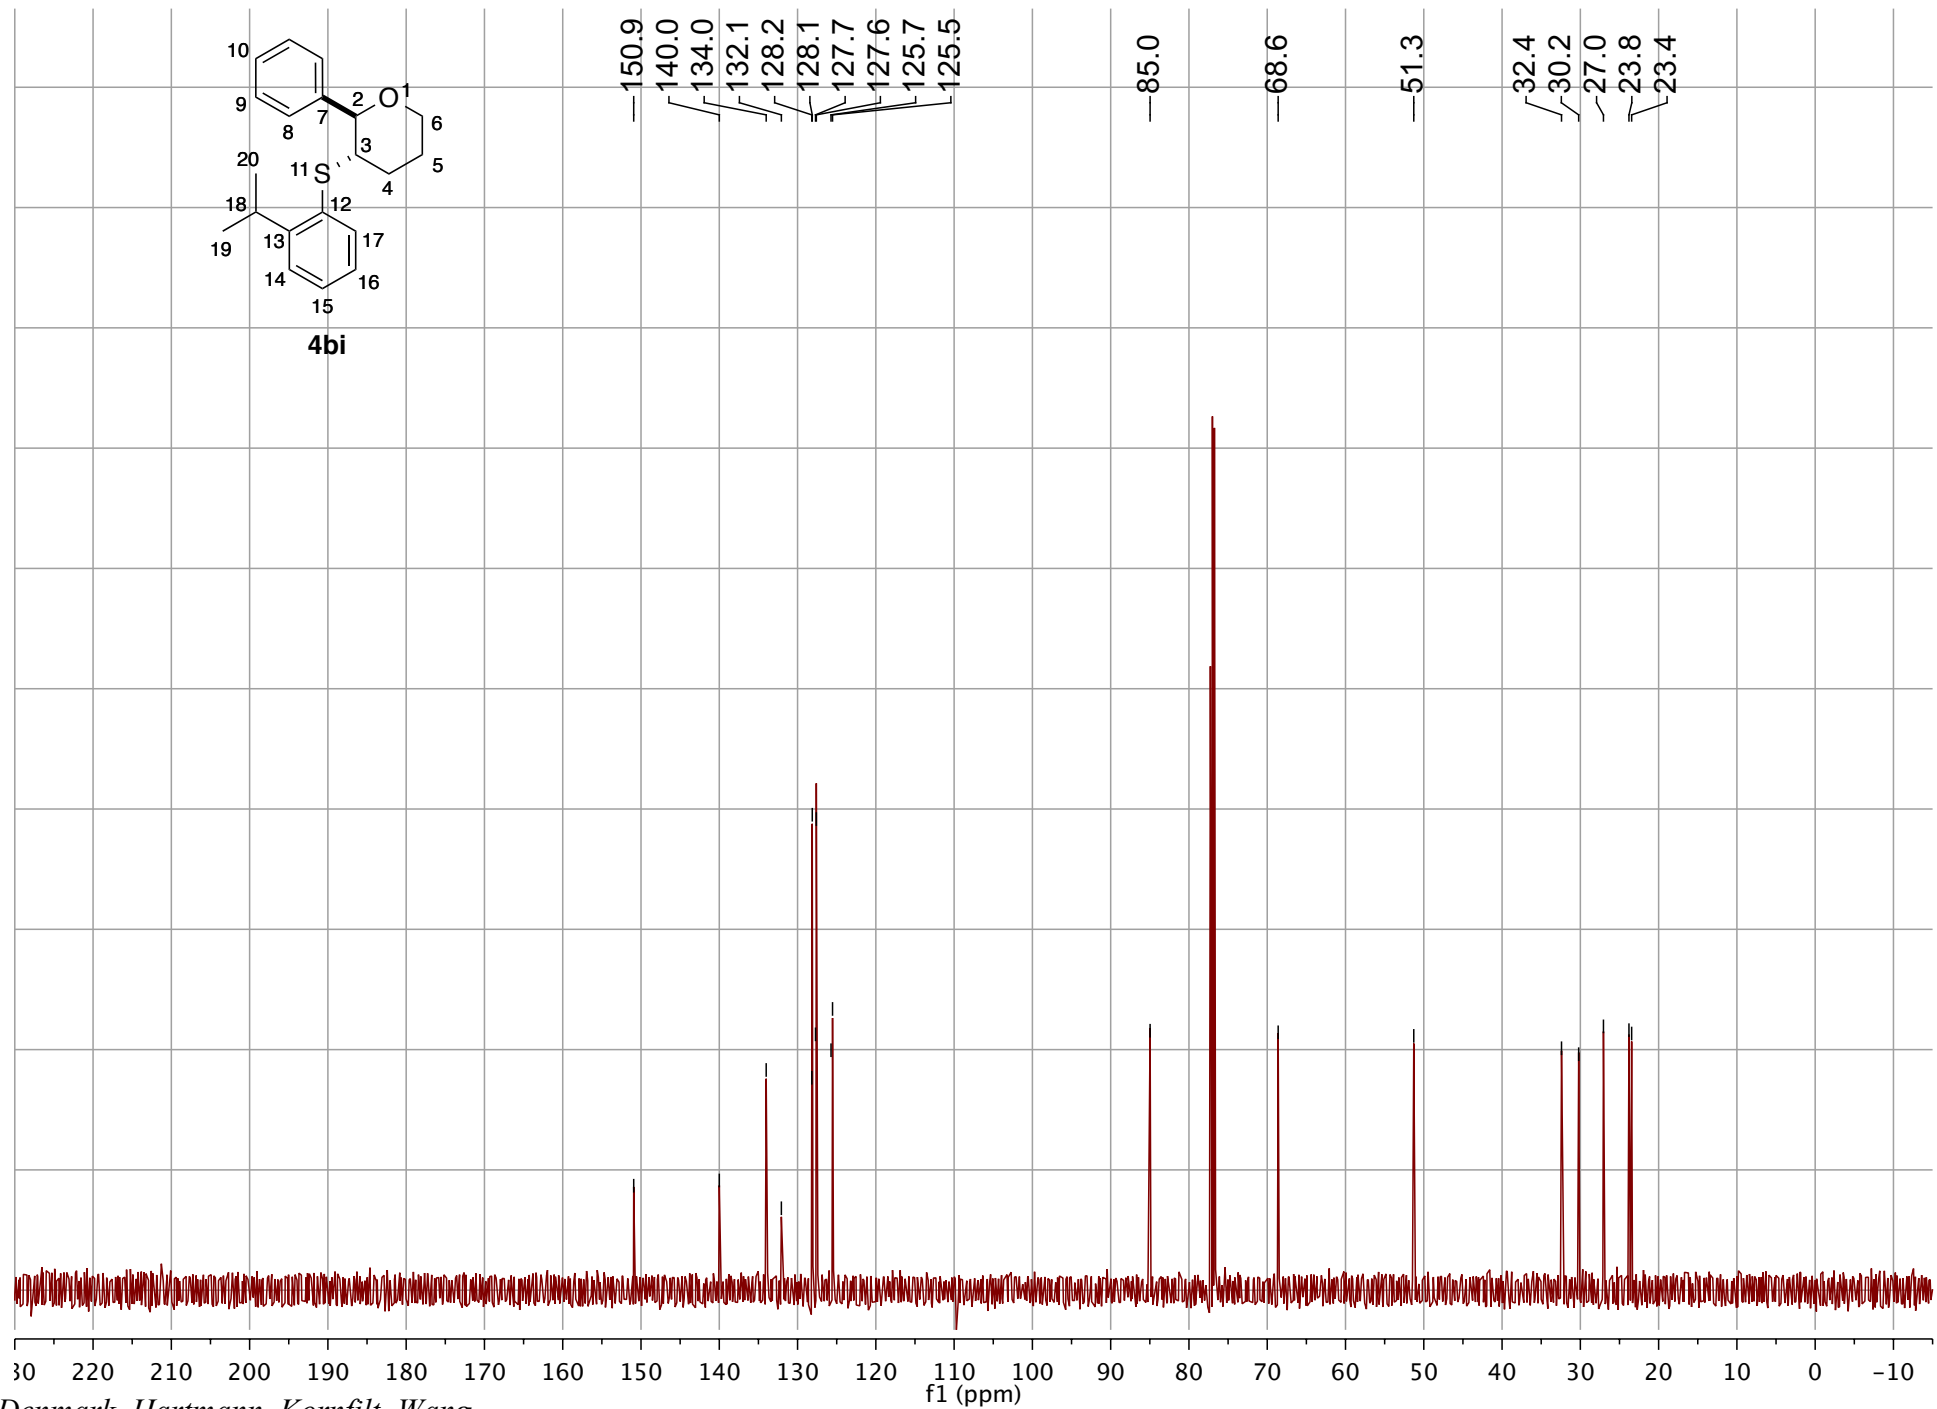



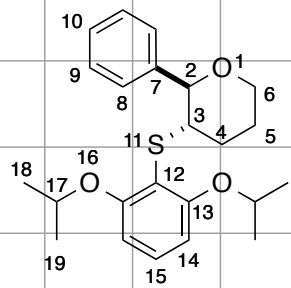

4bk

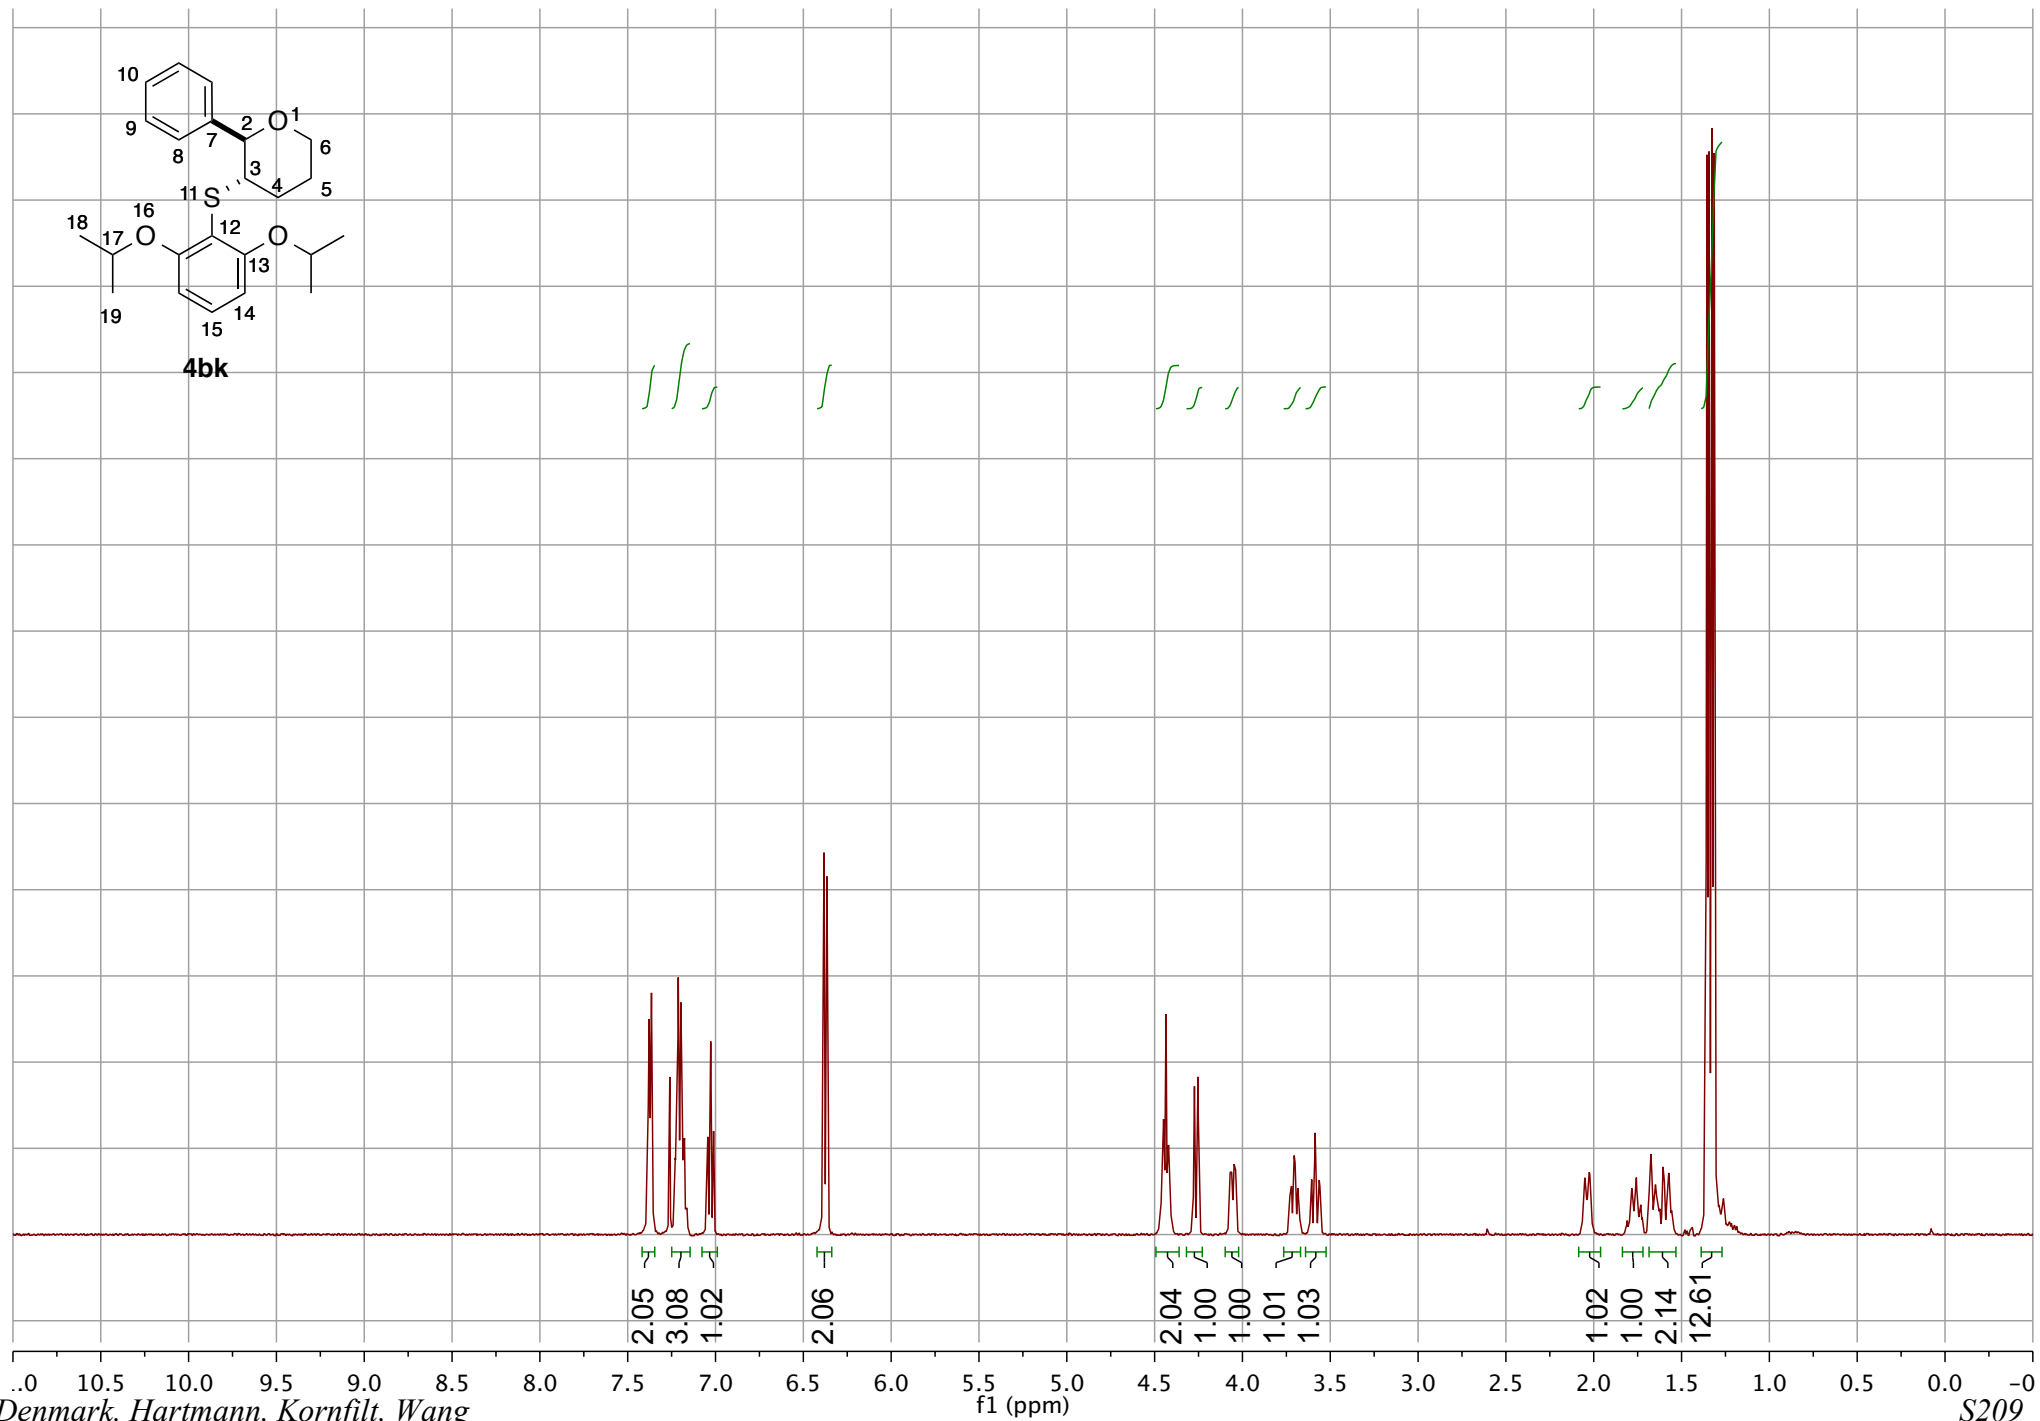

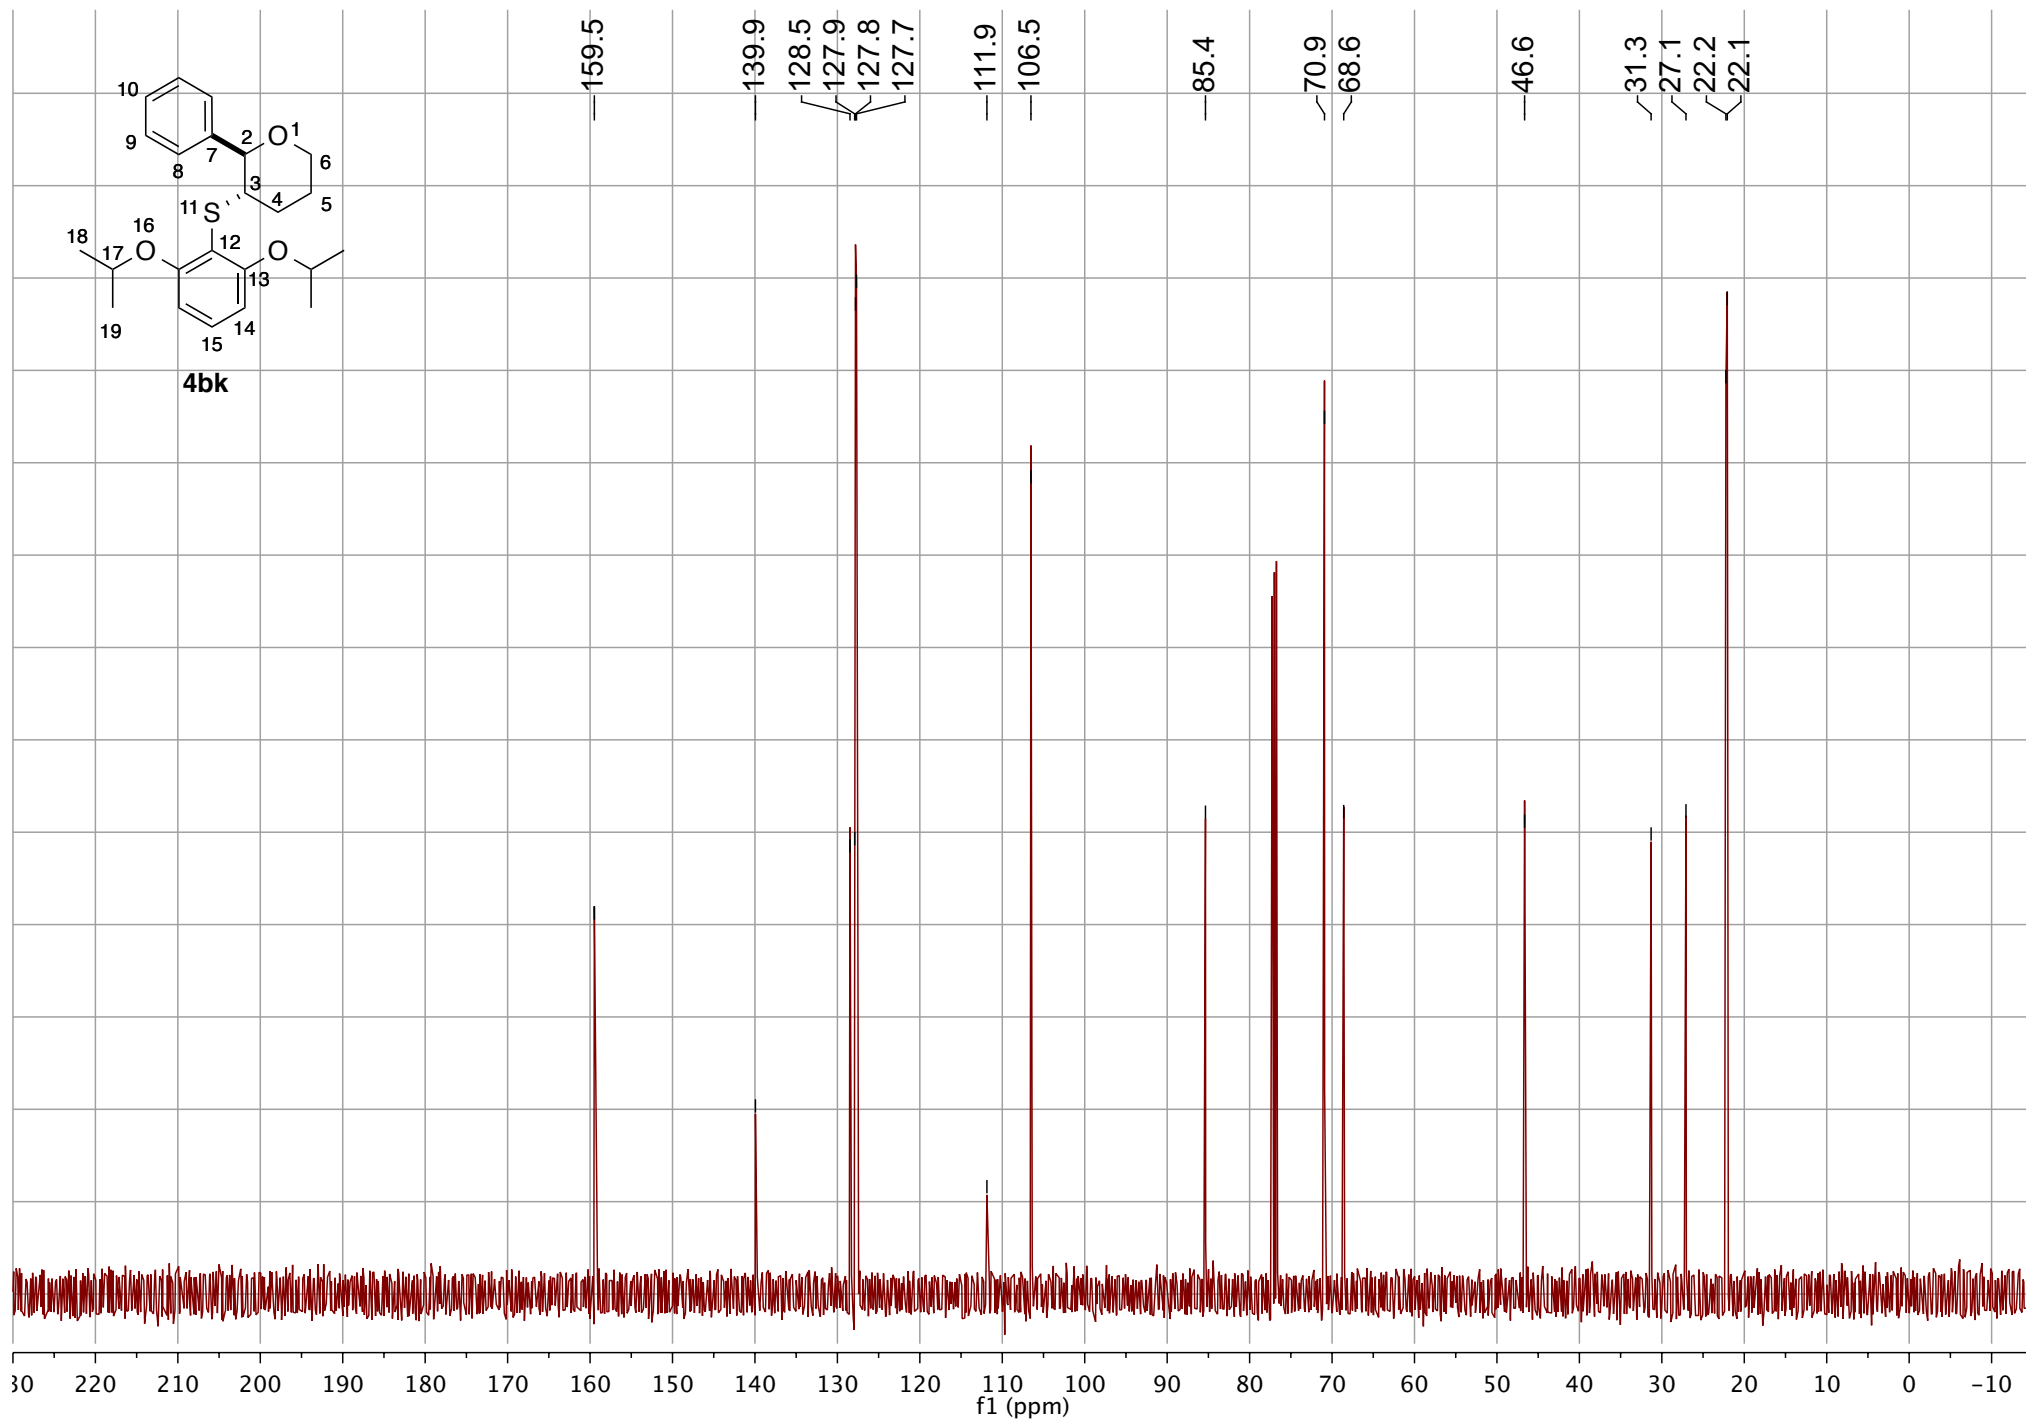

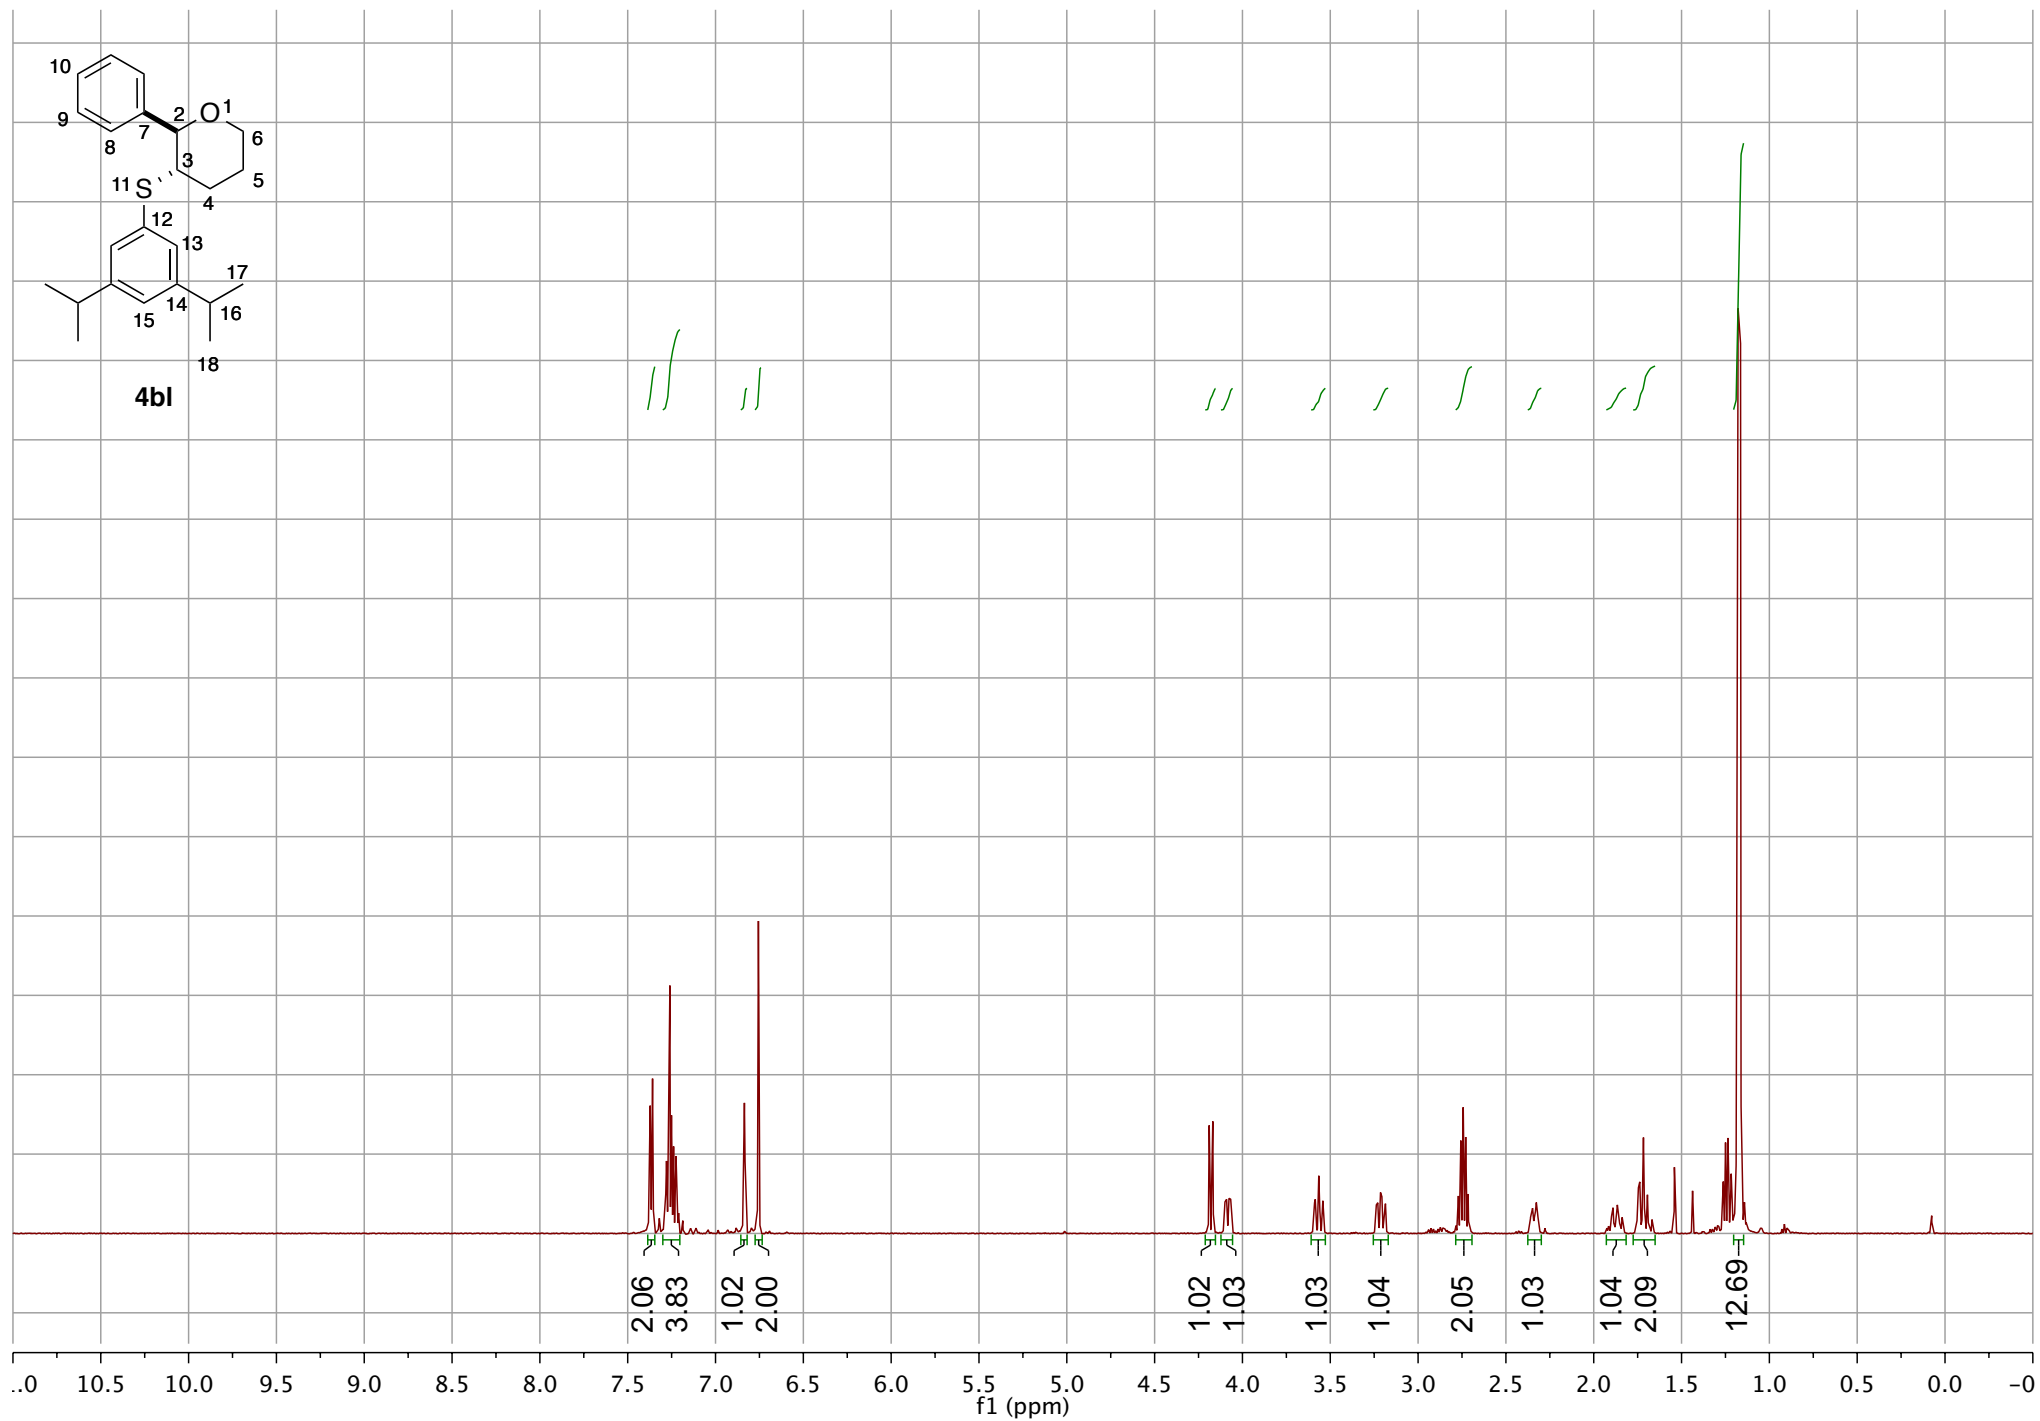

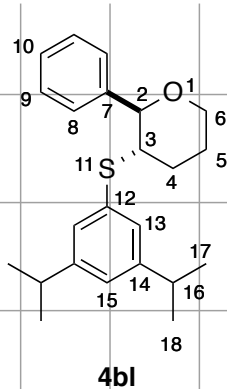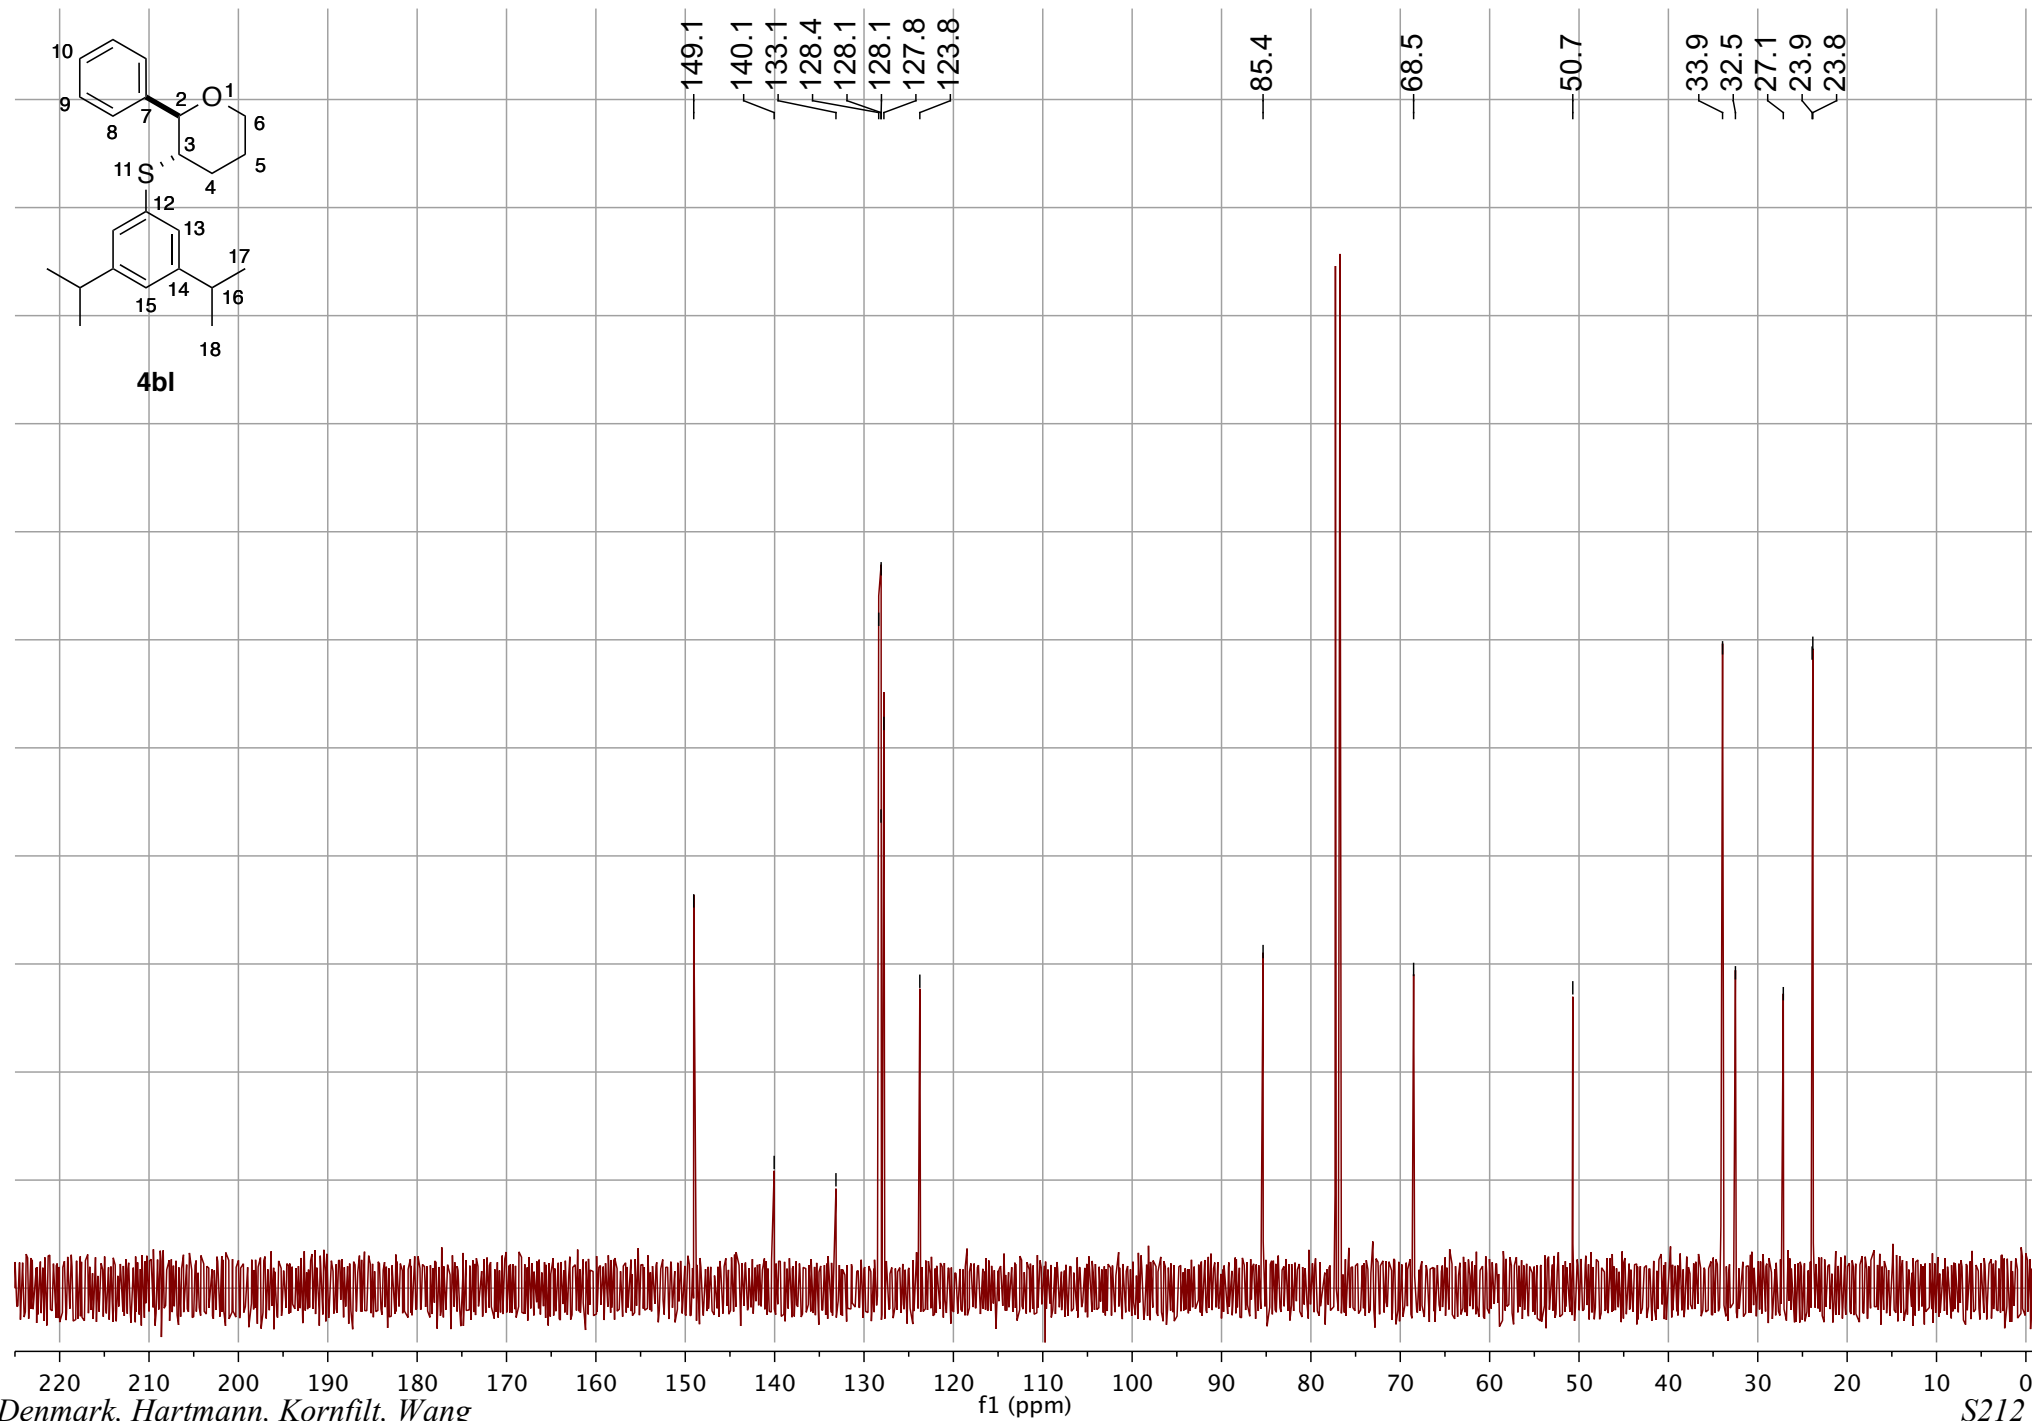

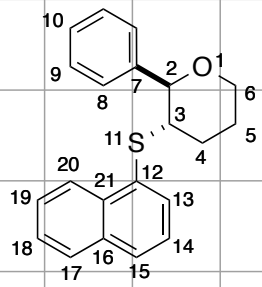

**4bm**

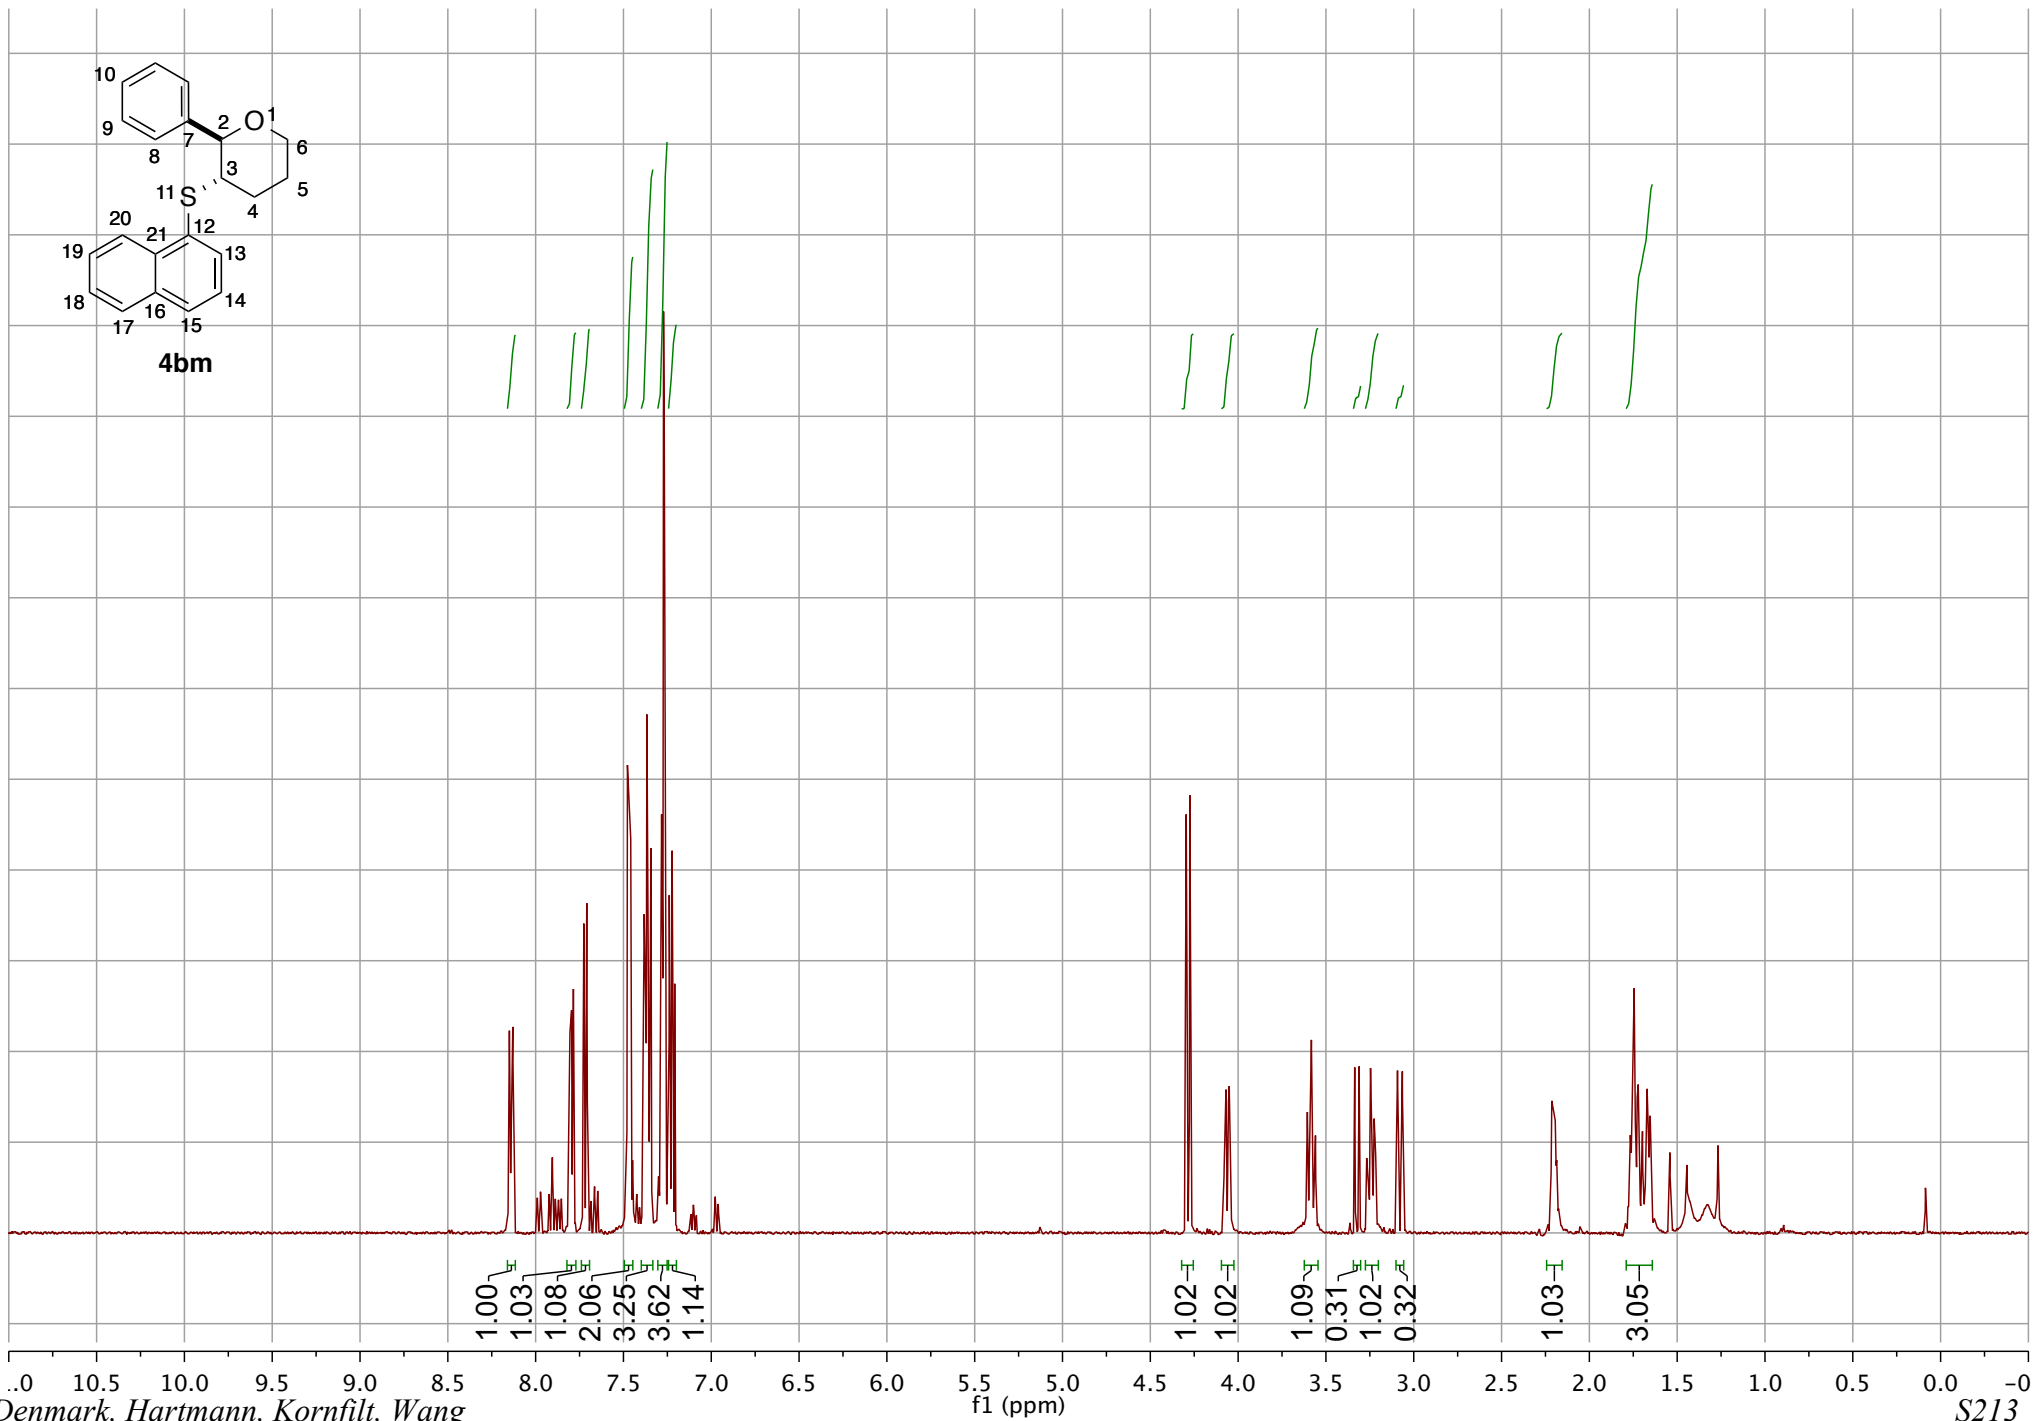

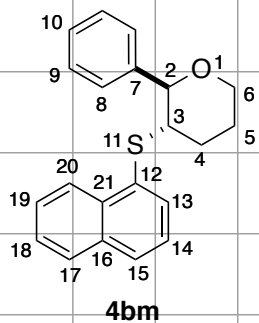

140.0  
134.5  
133.9  
133.6  
130.8  
128.7  
128.4  
128.3  
128.2  
128.1  
127.7  
126.4  
126.0  
125.2

—85.2

—68.5

—50.9

—32.3

—27.0

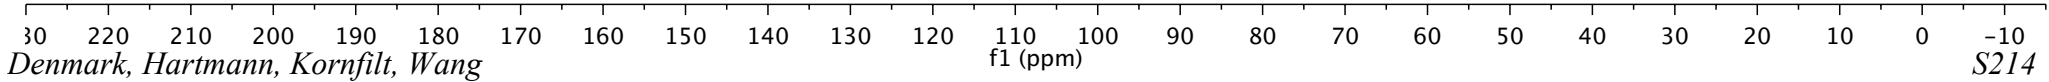

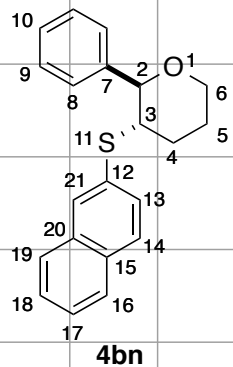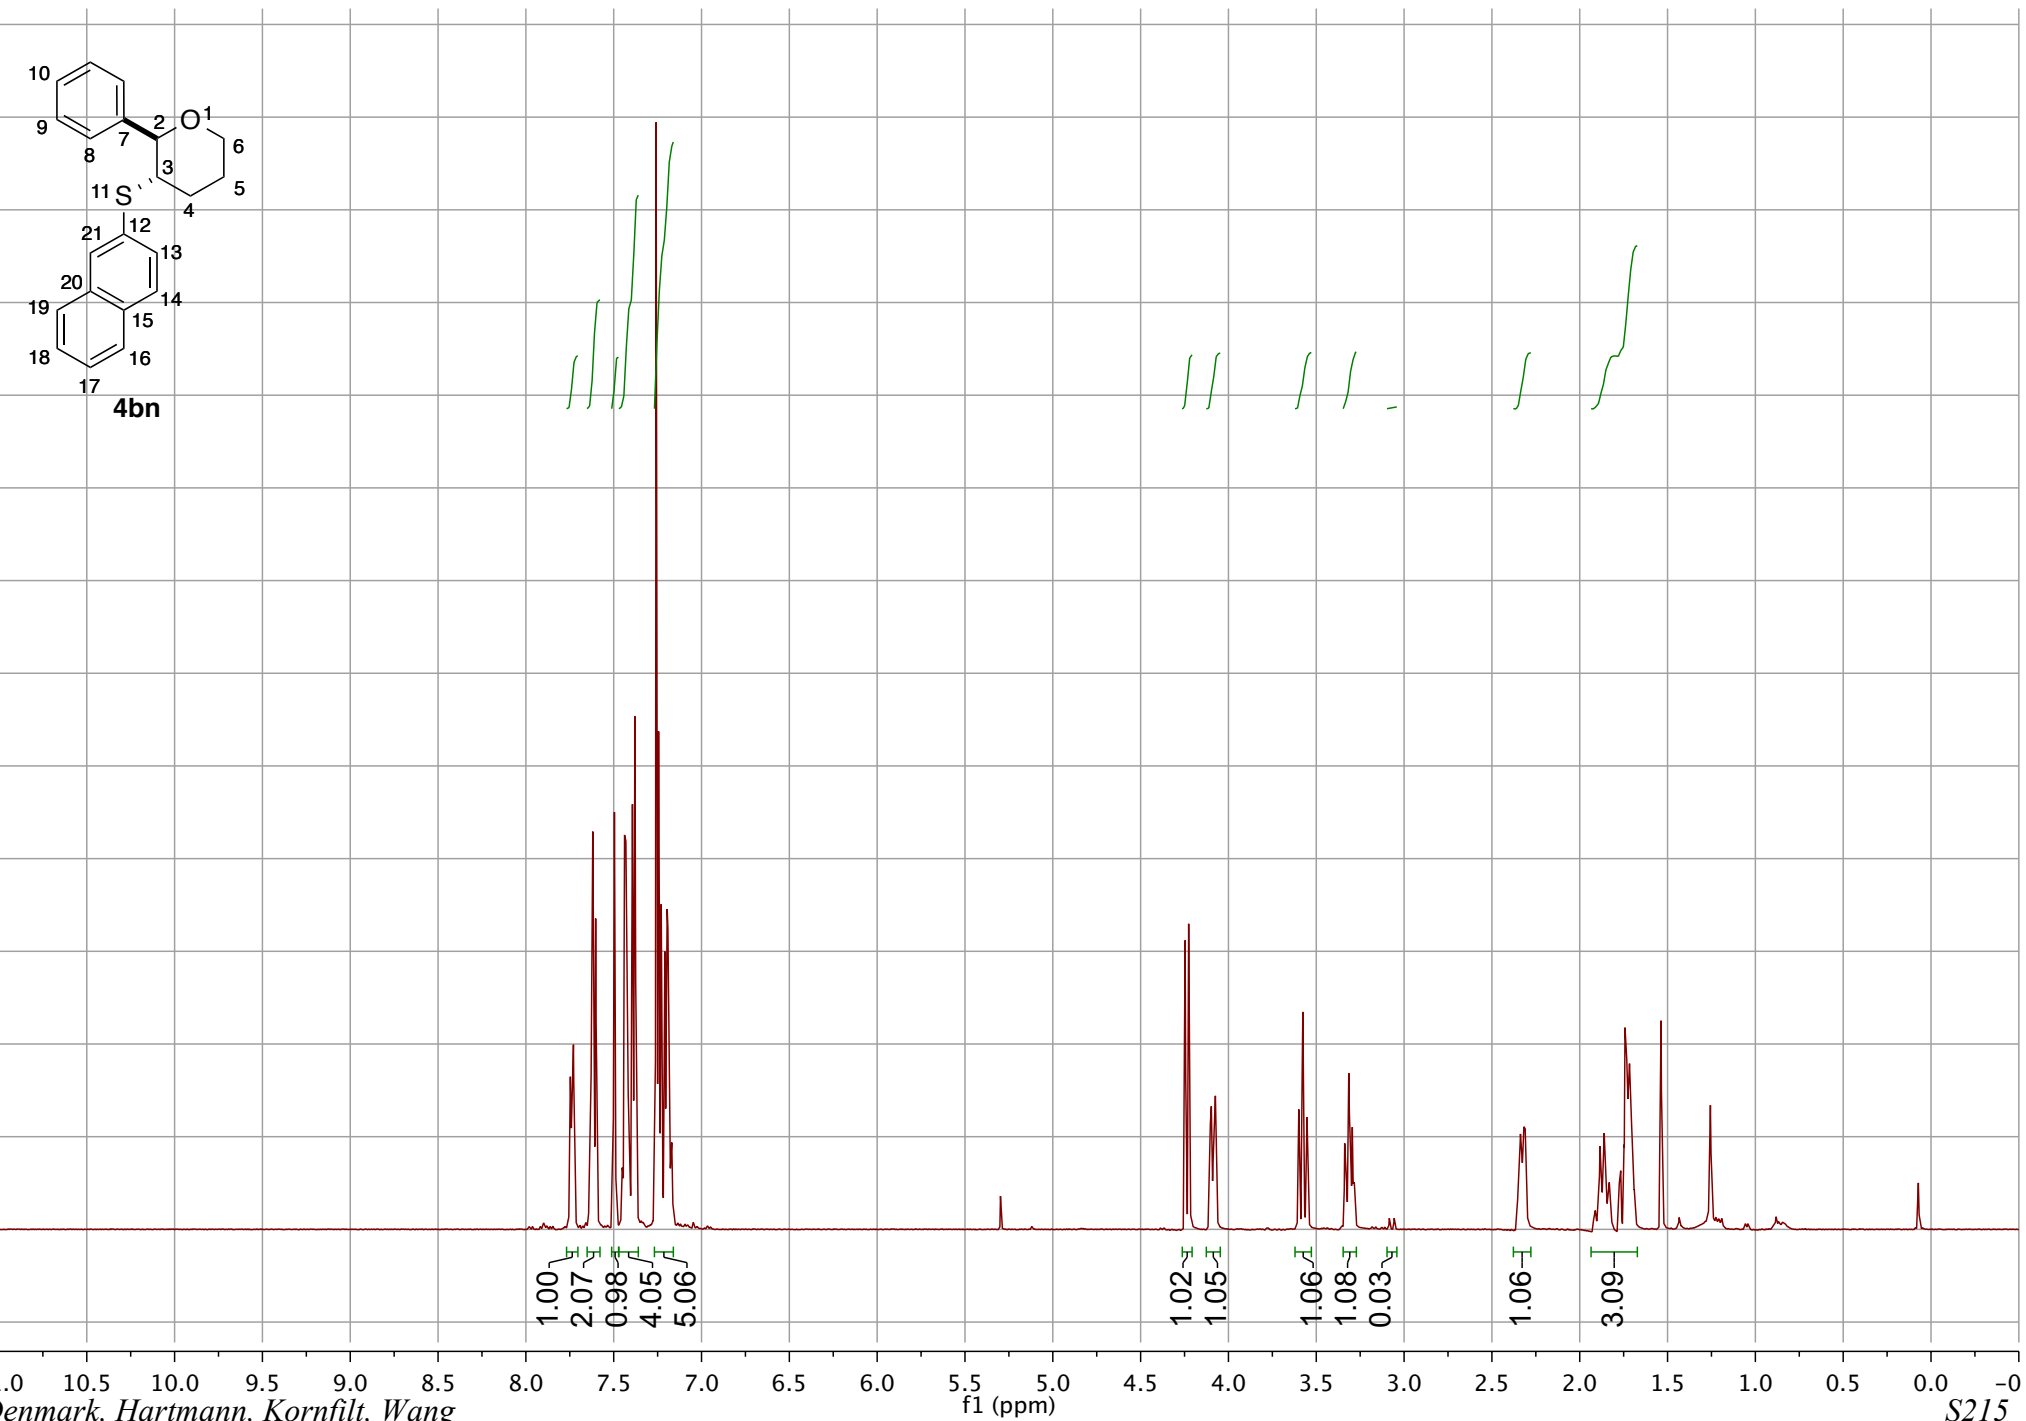

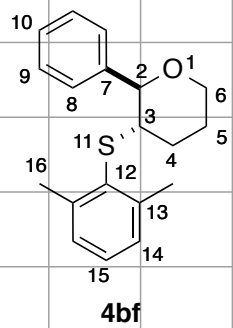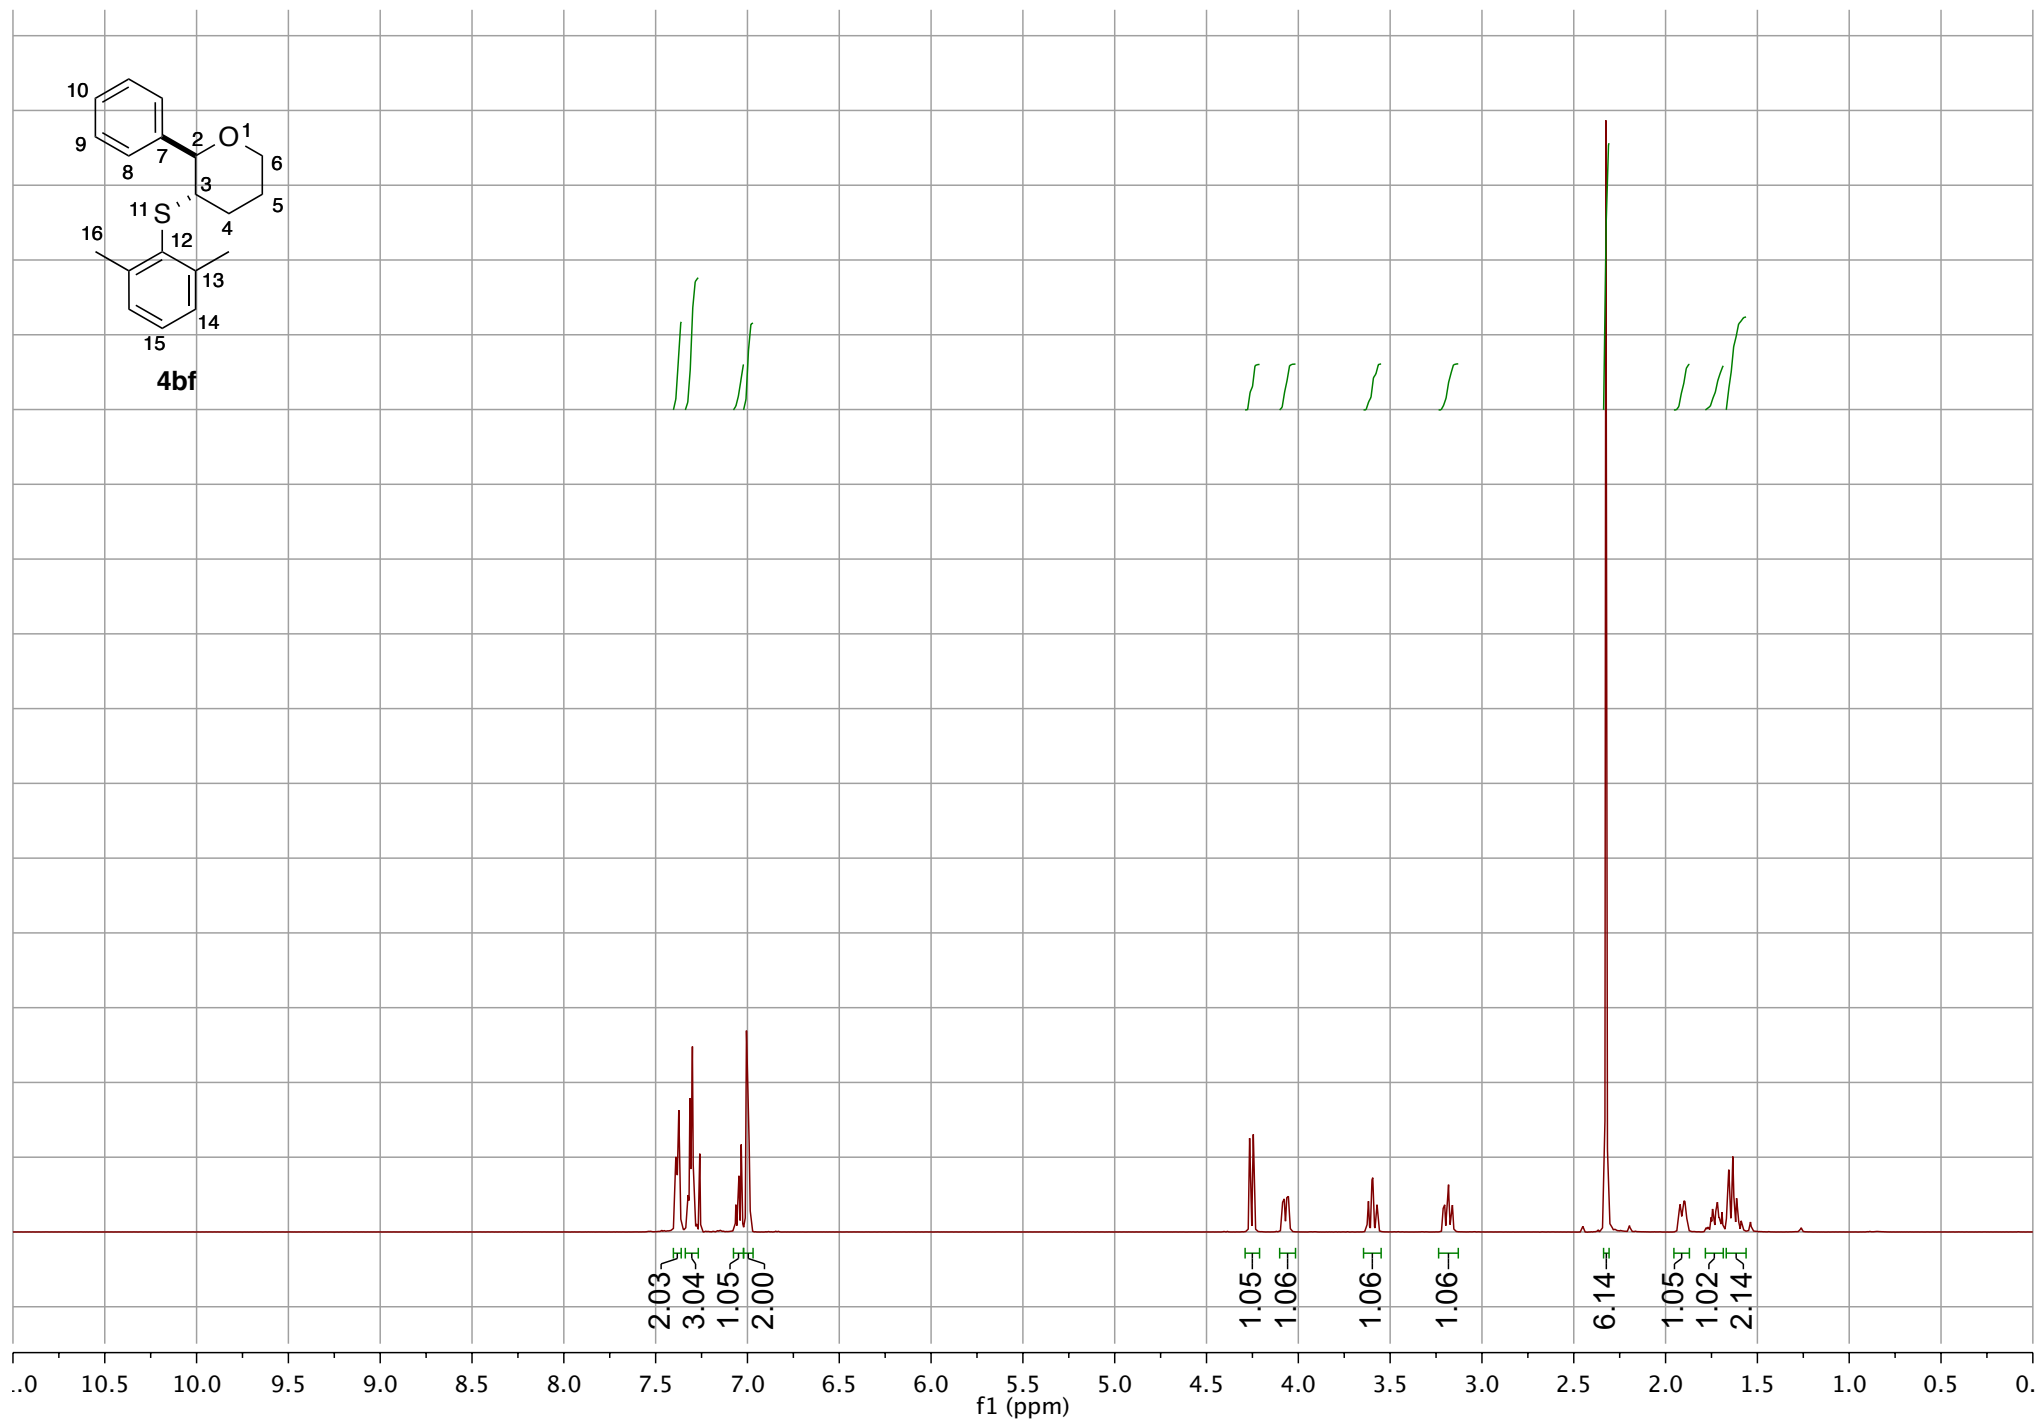



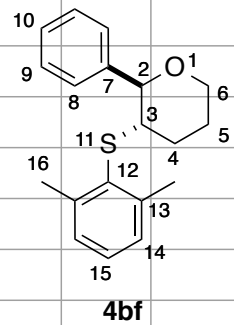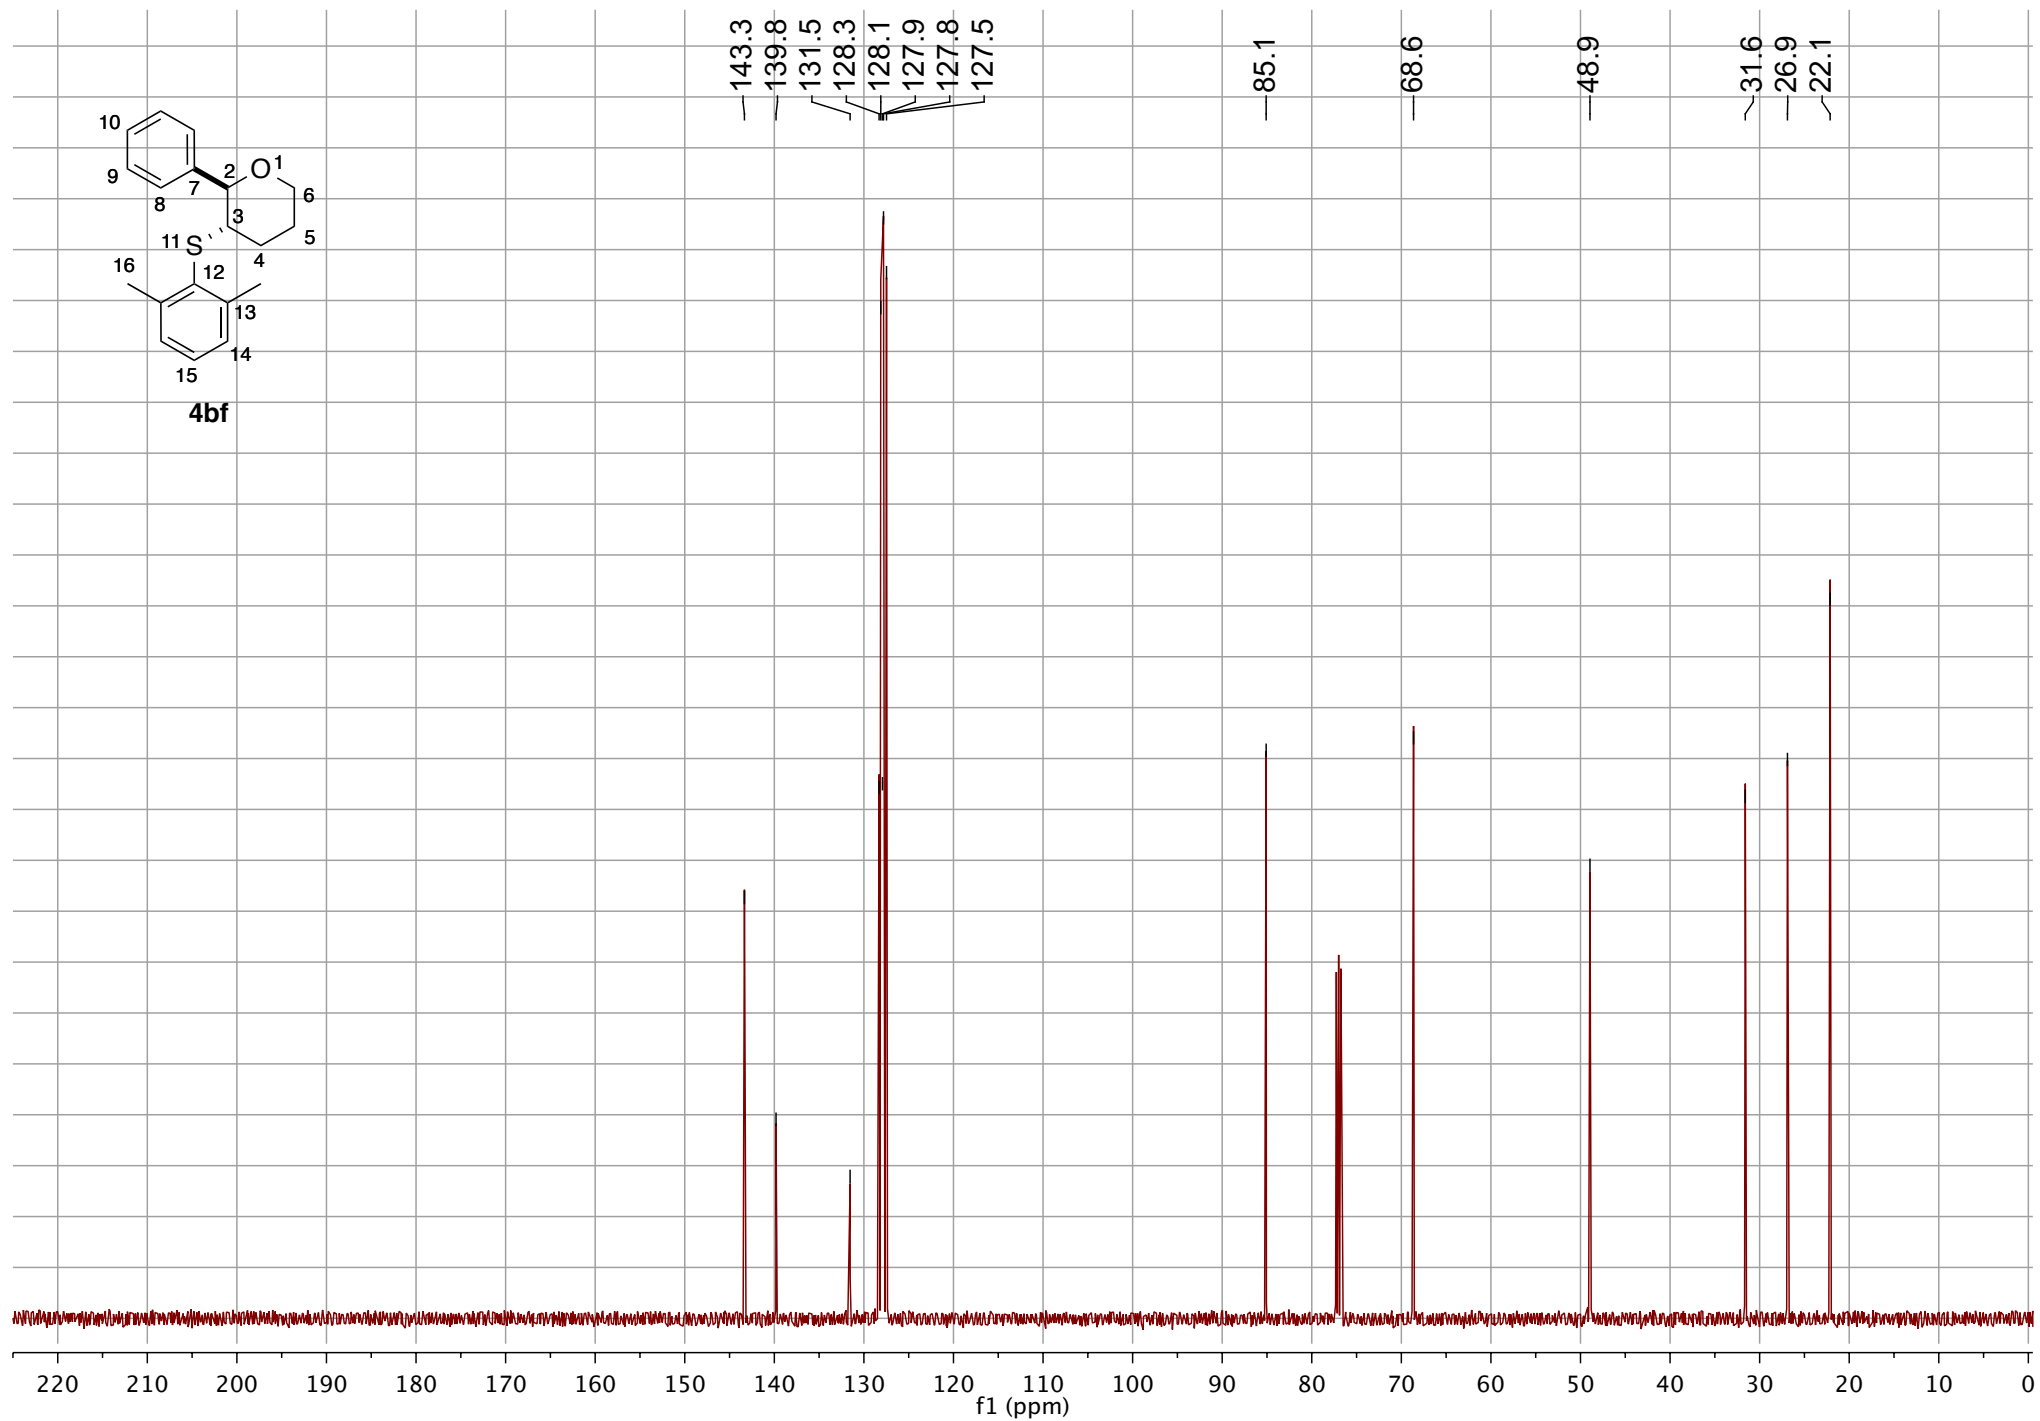

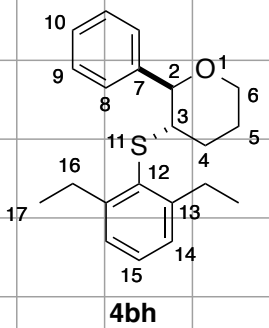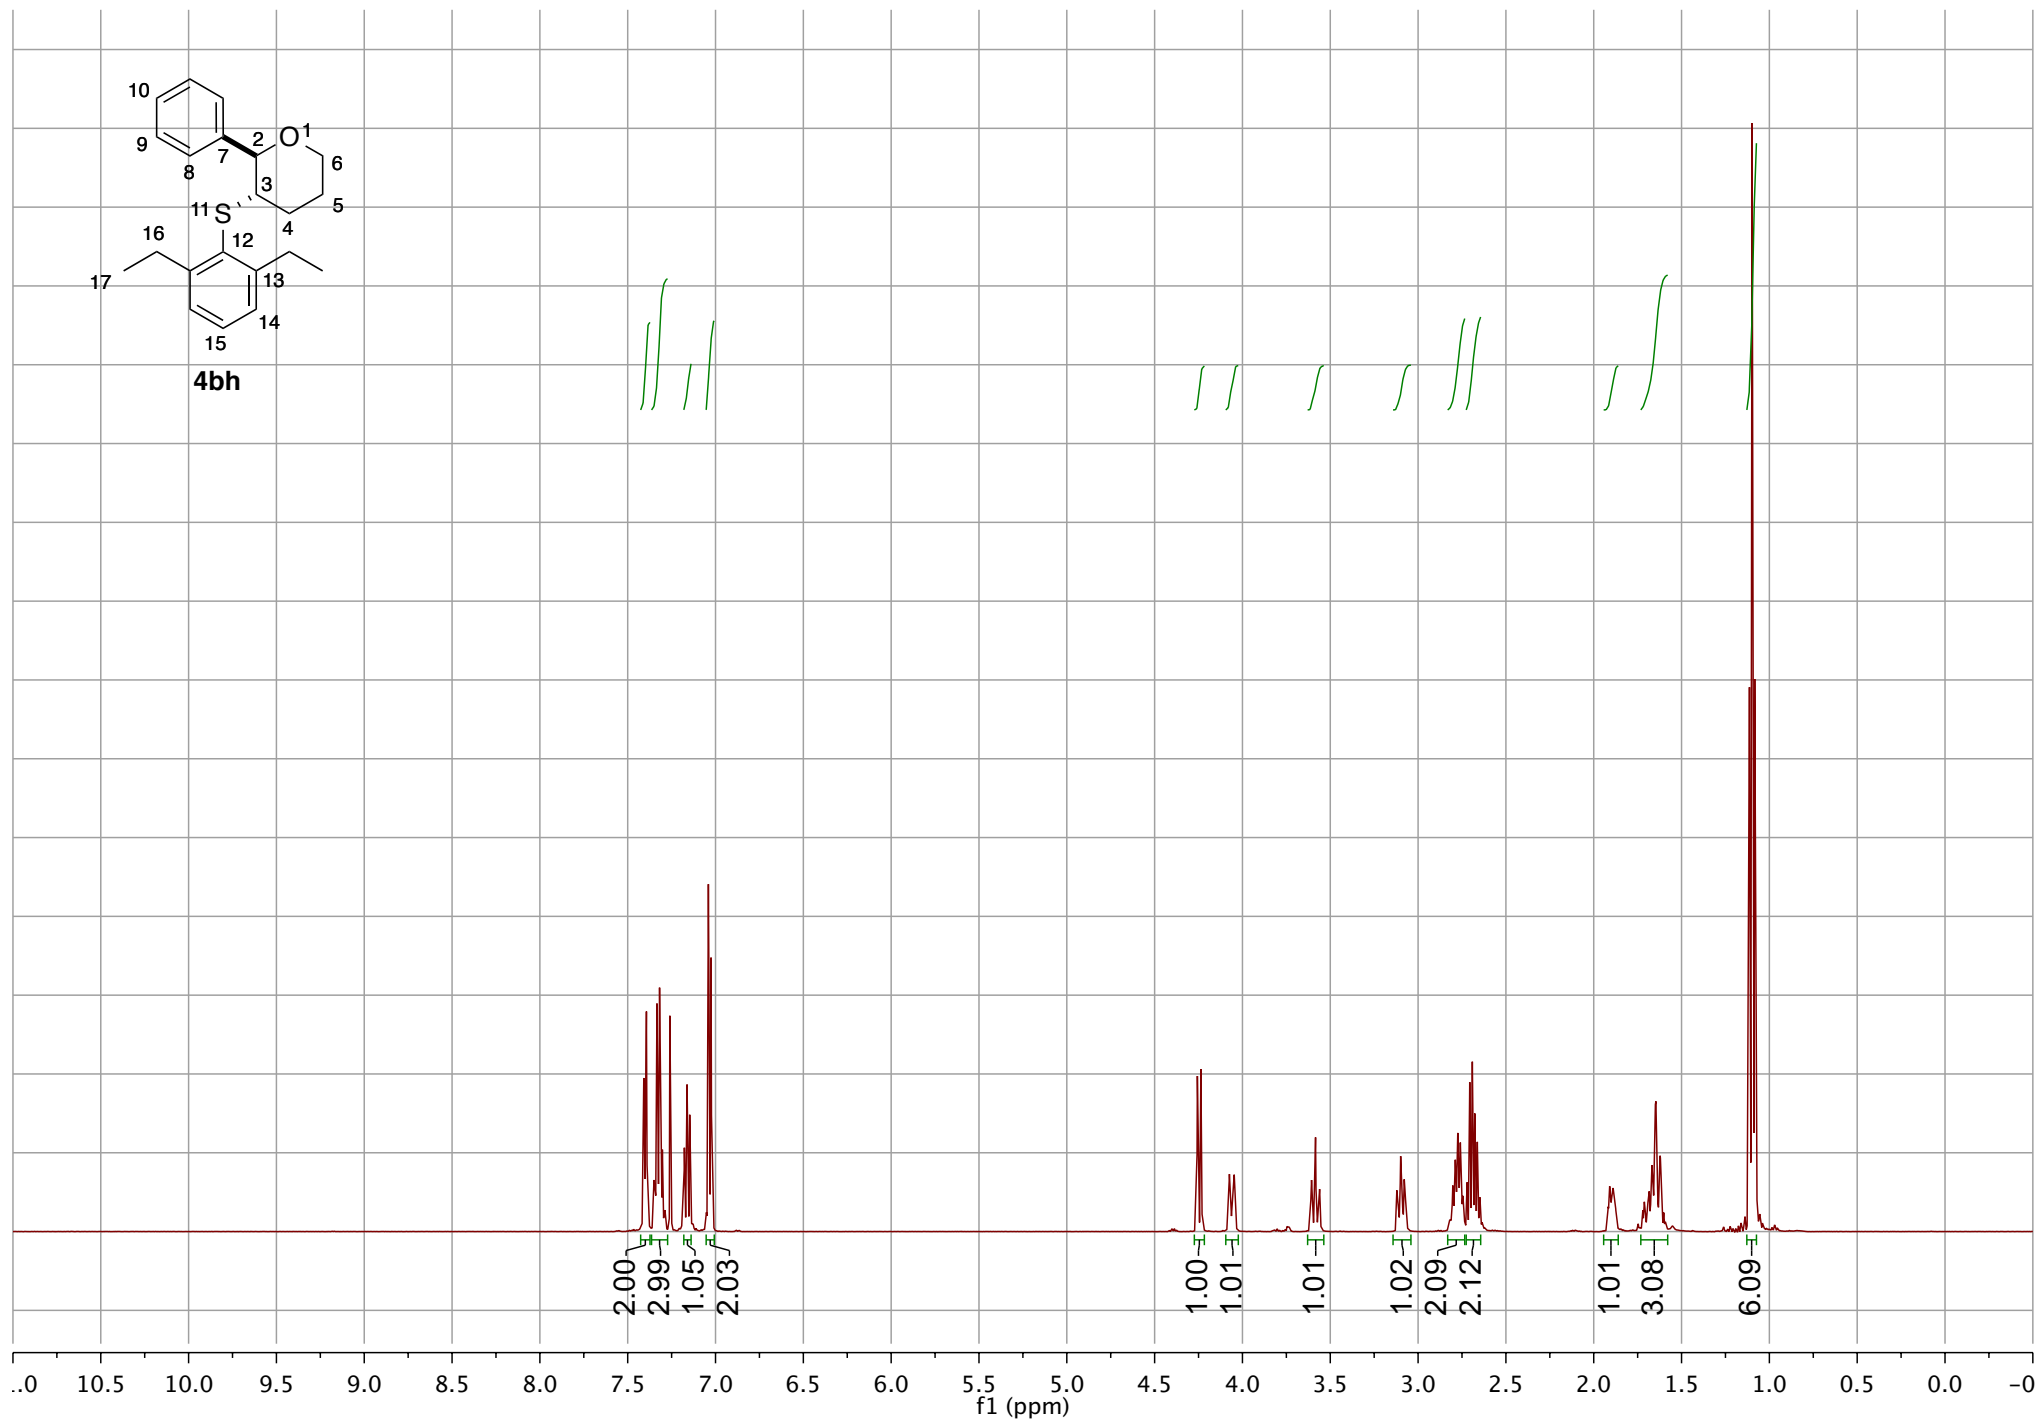

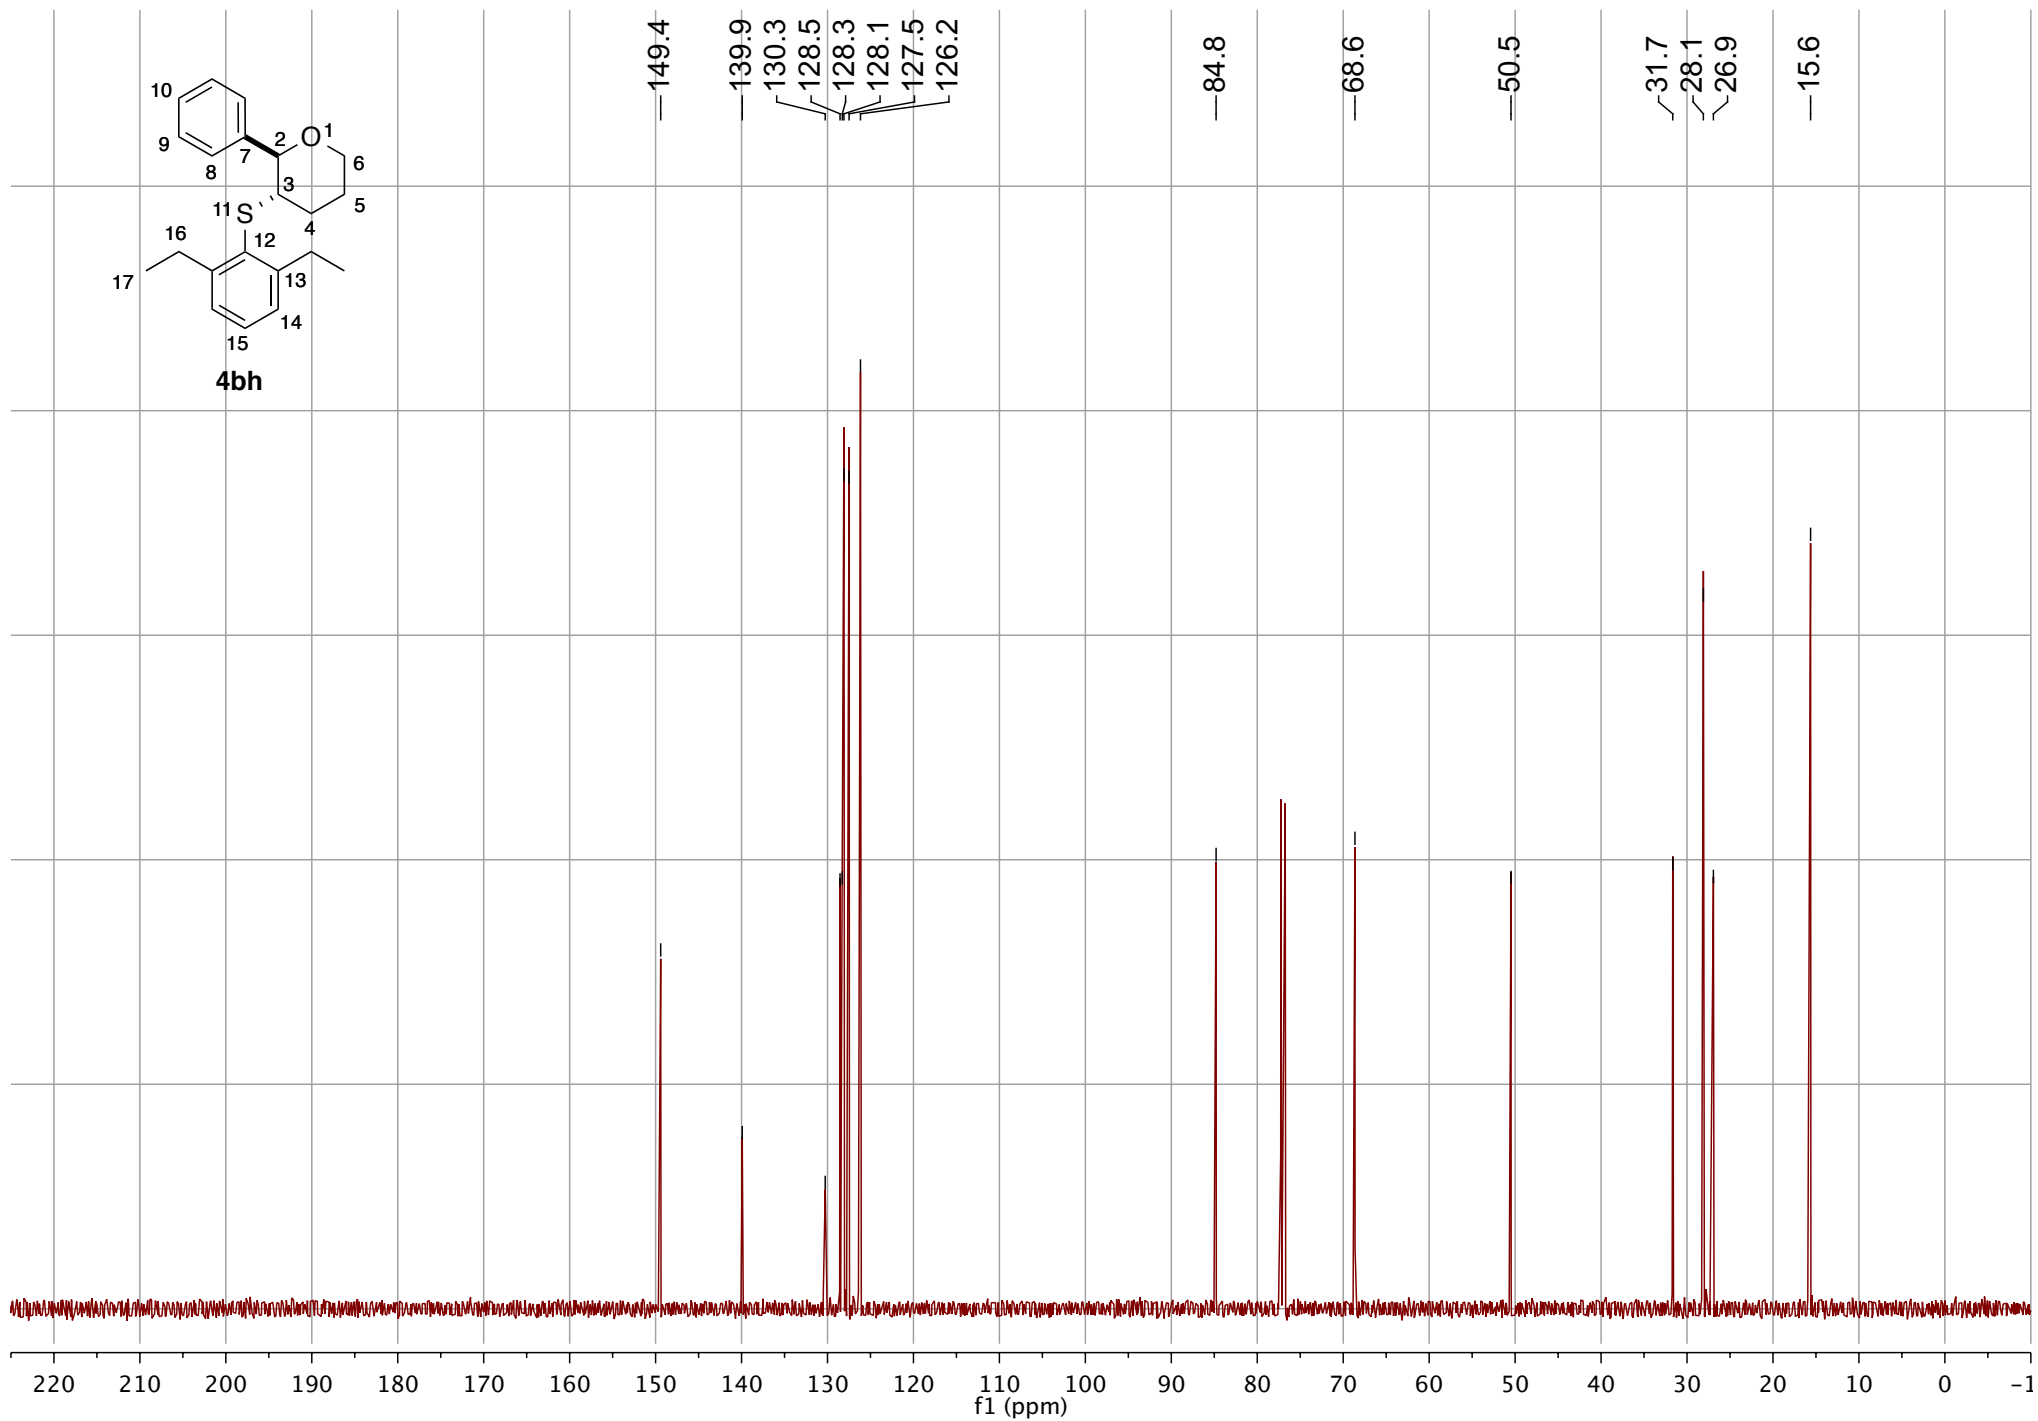

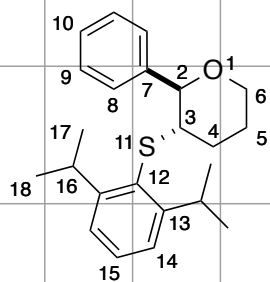

**4bj**

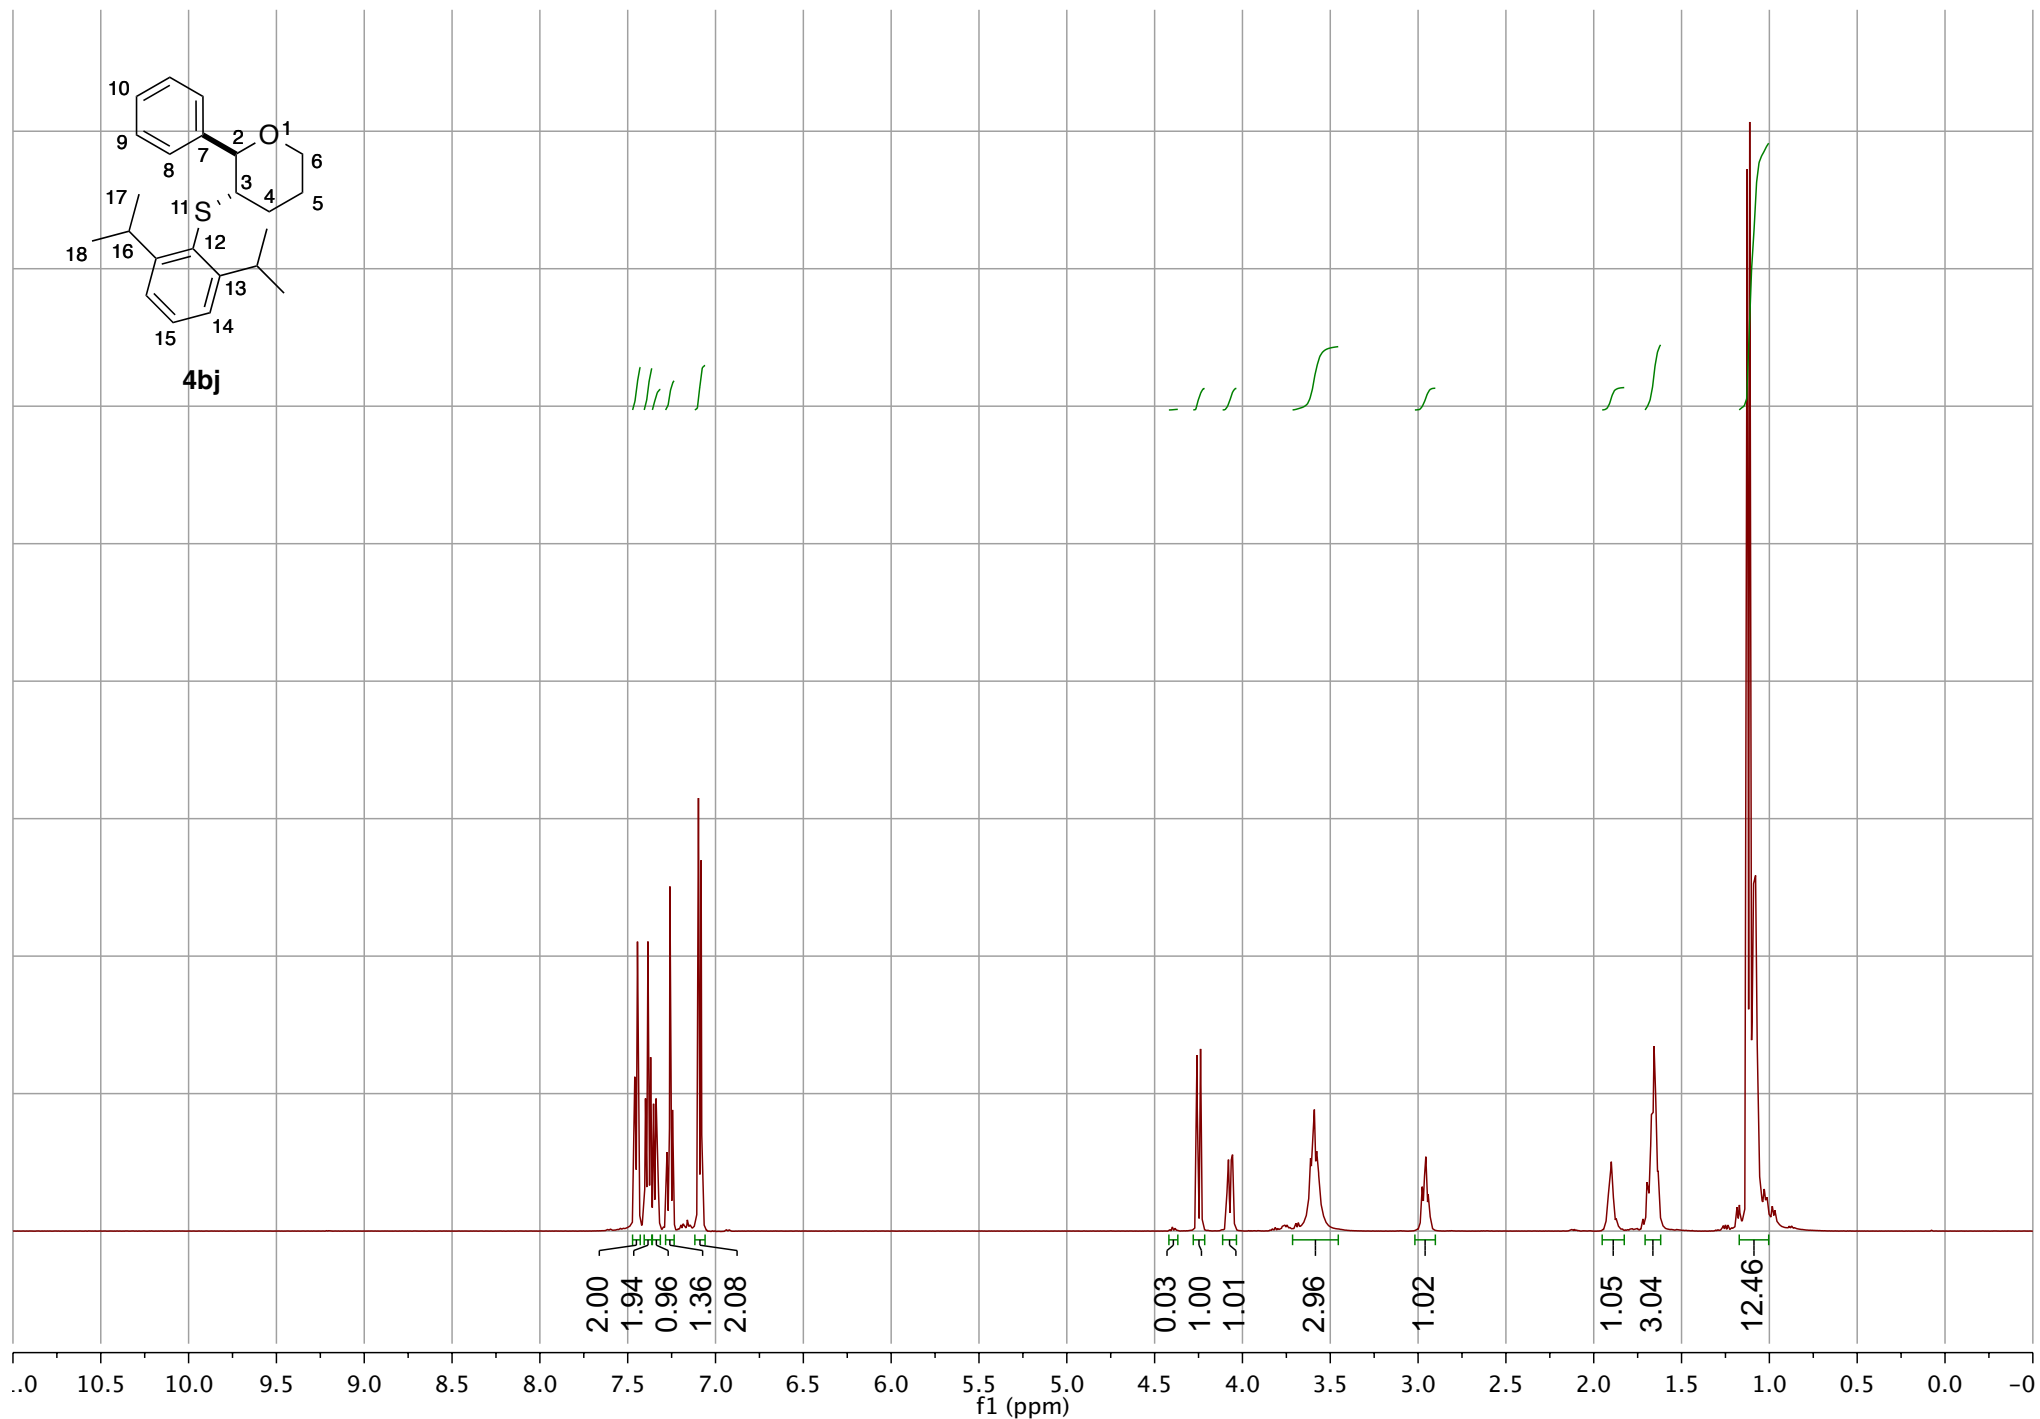

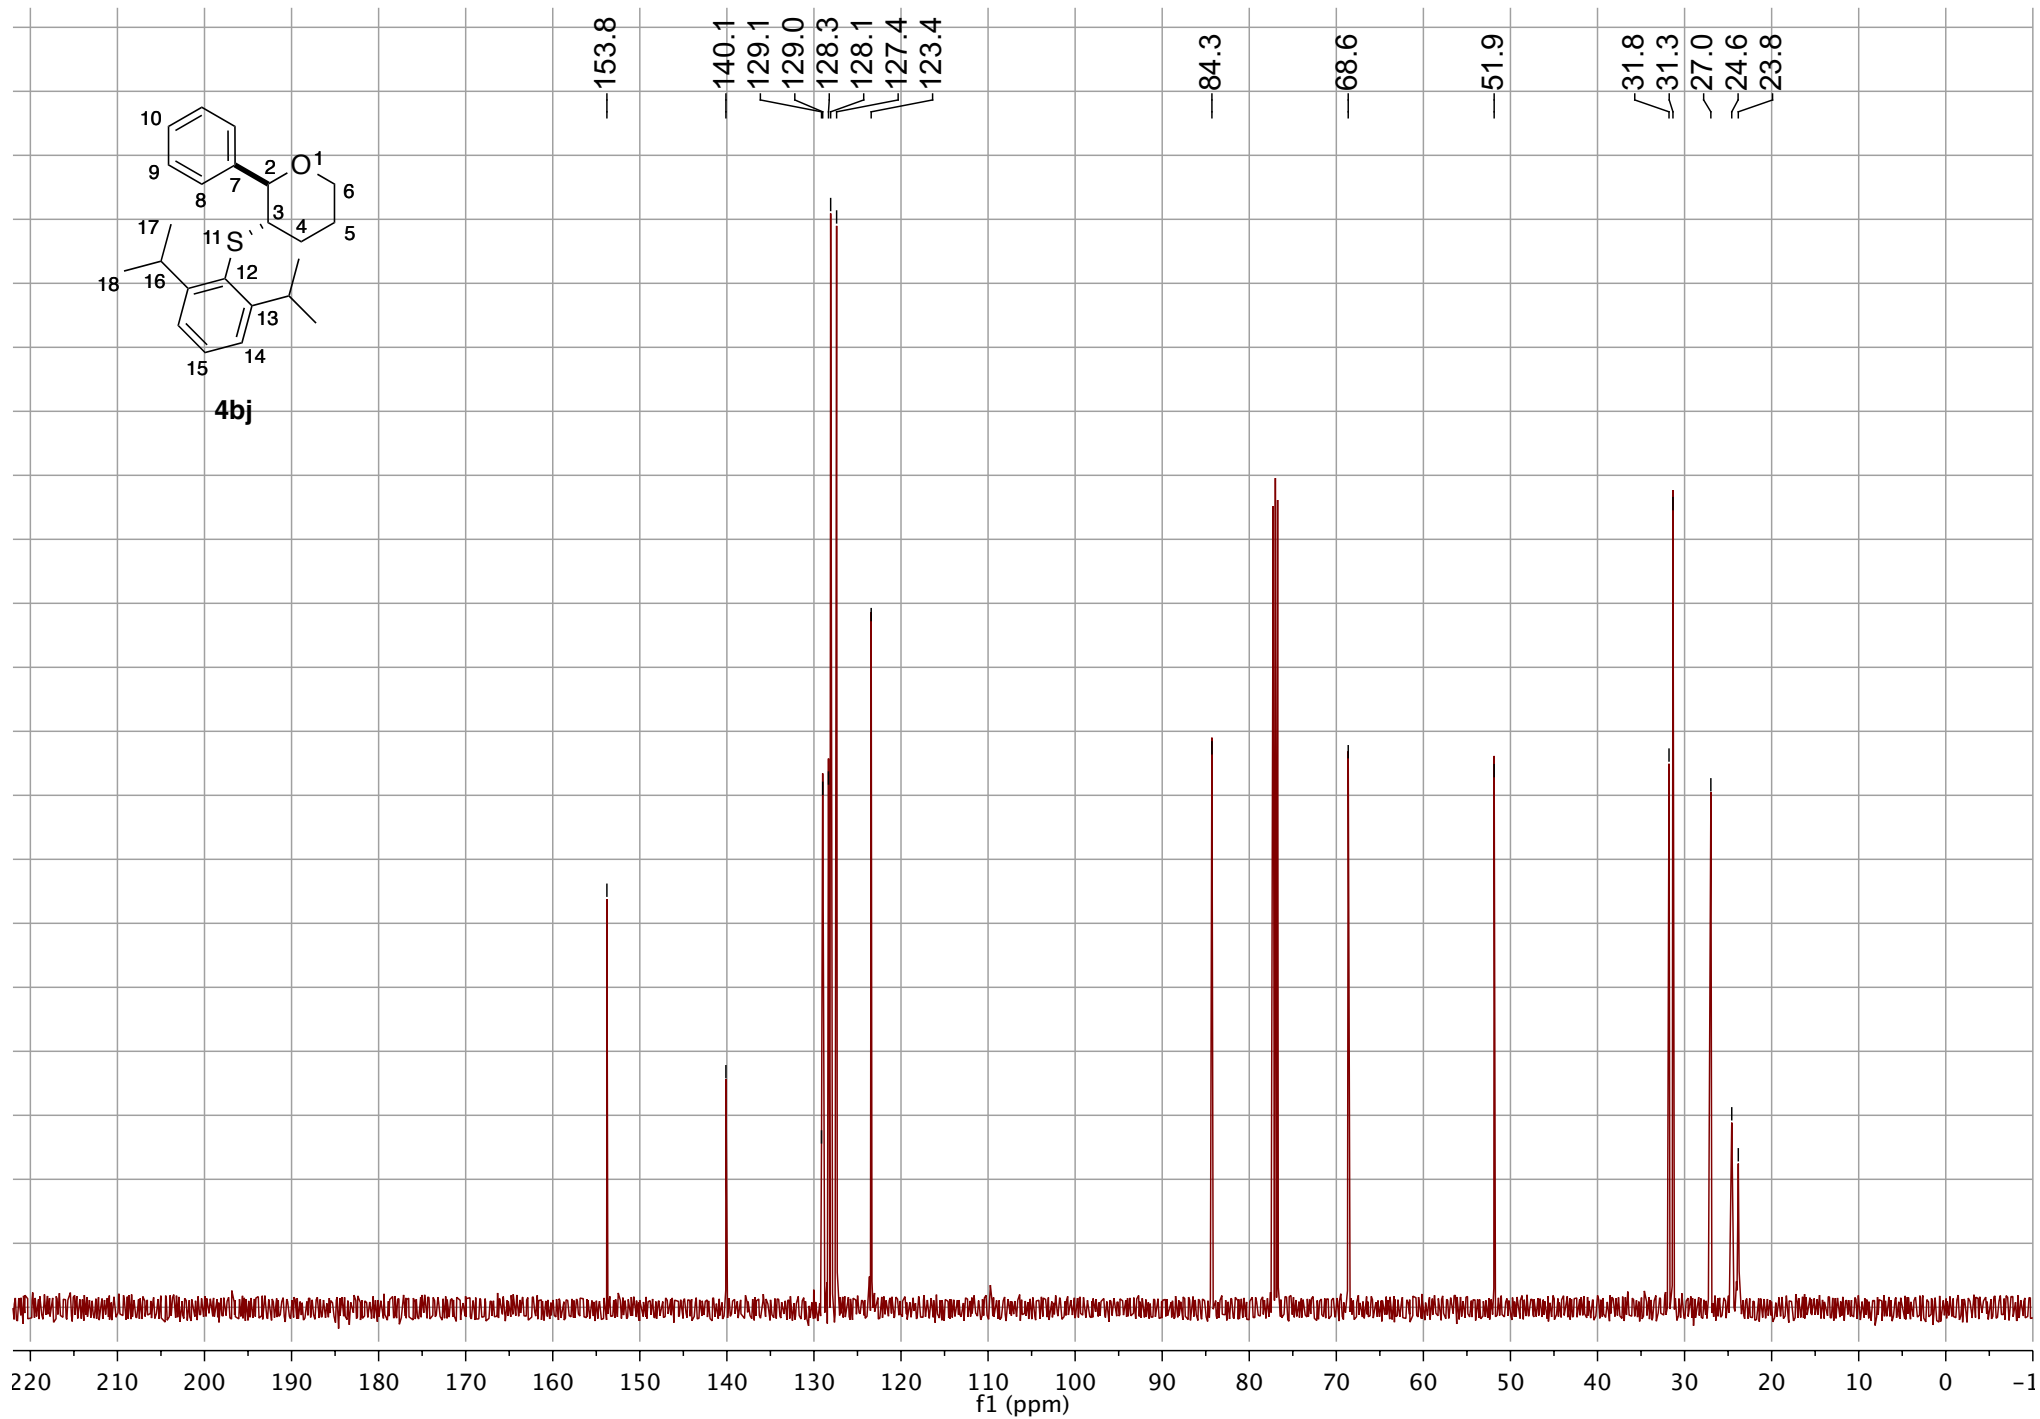

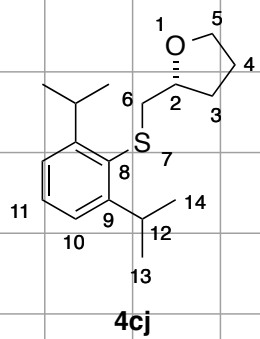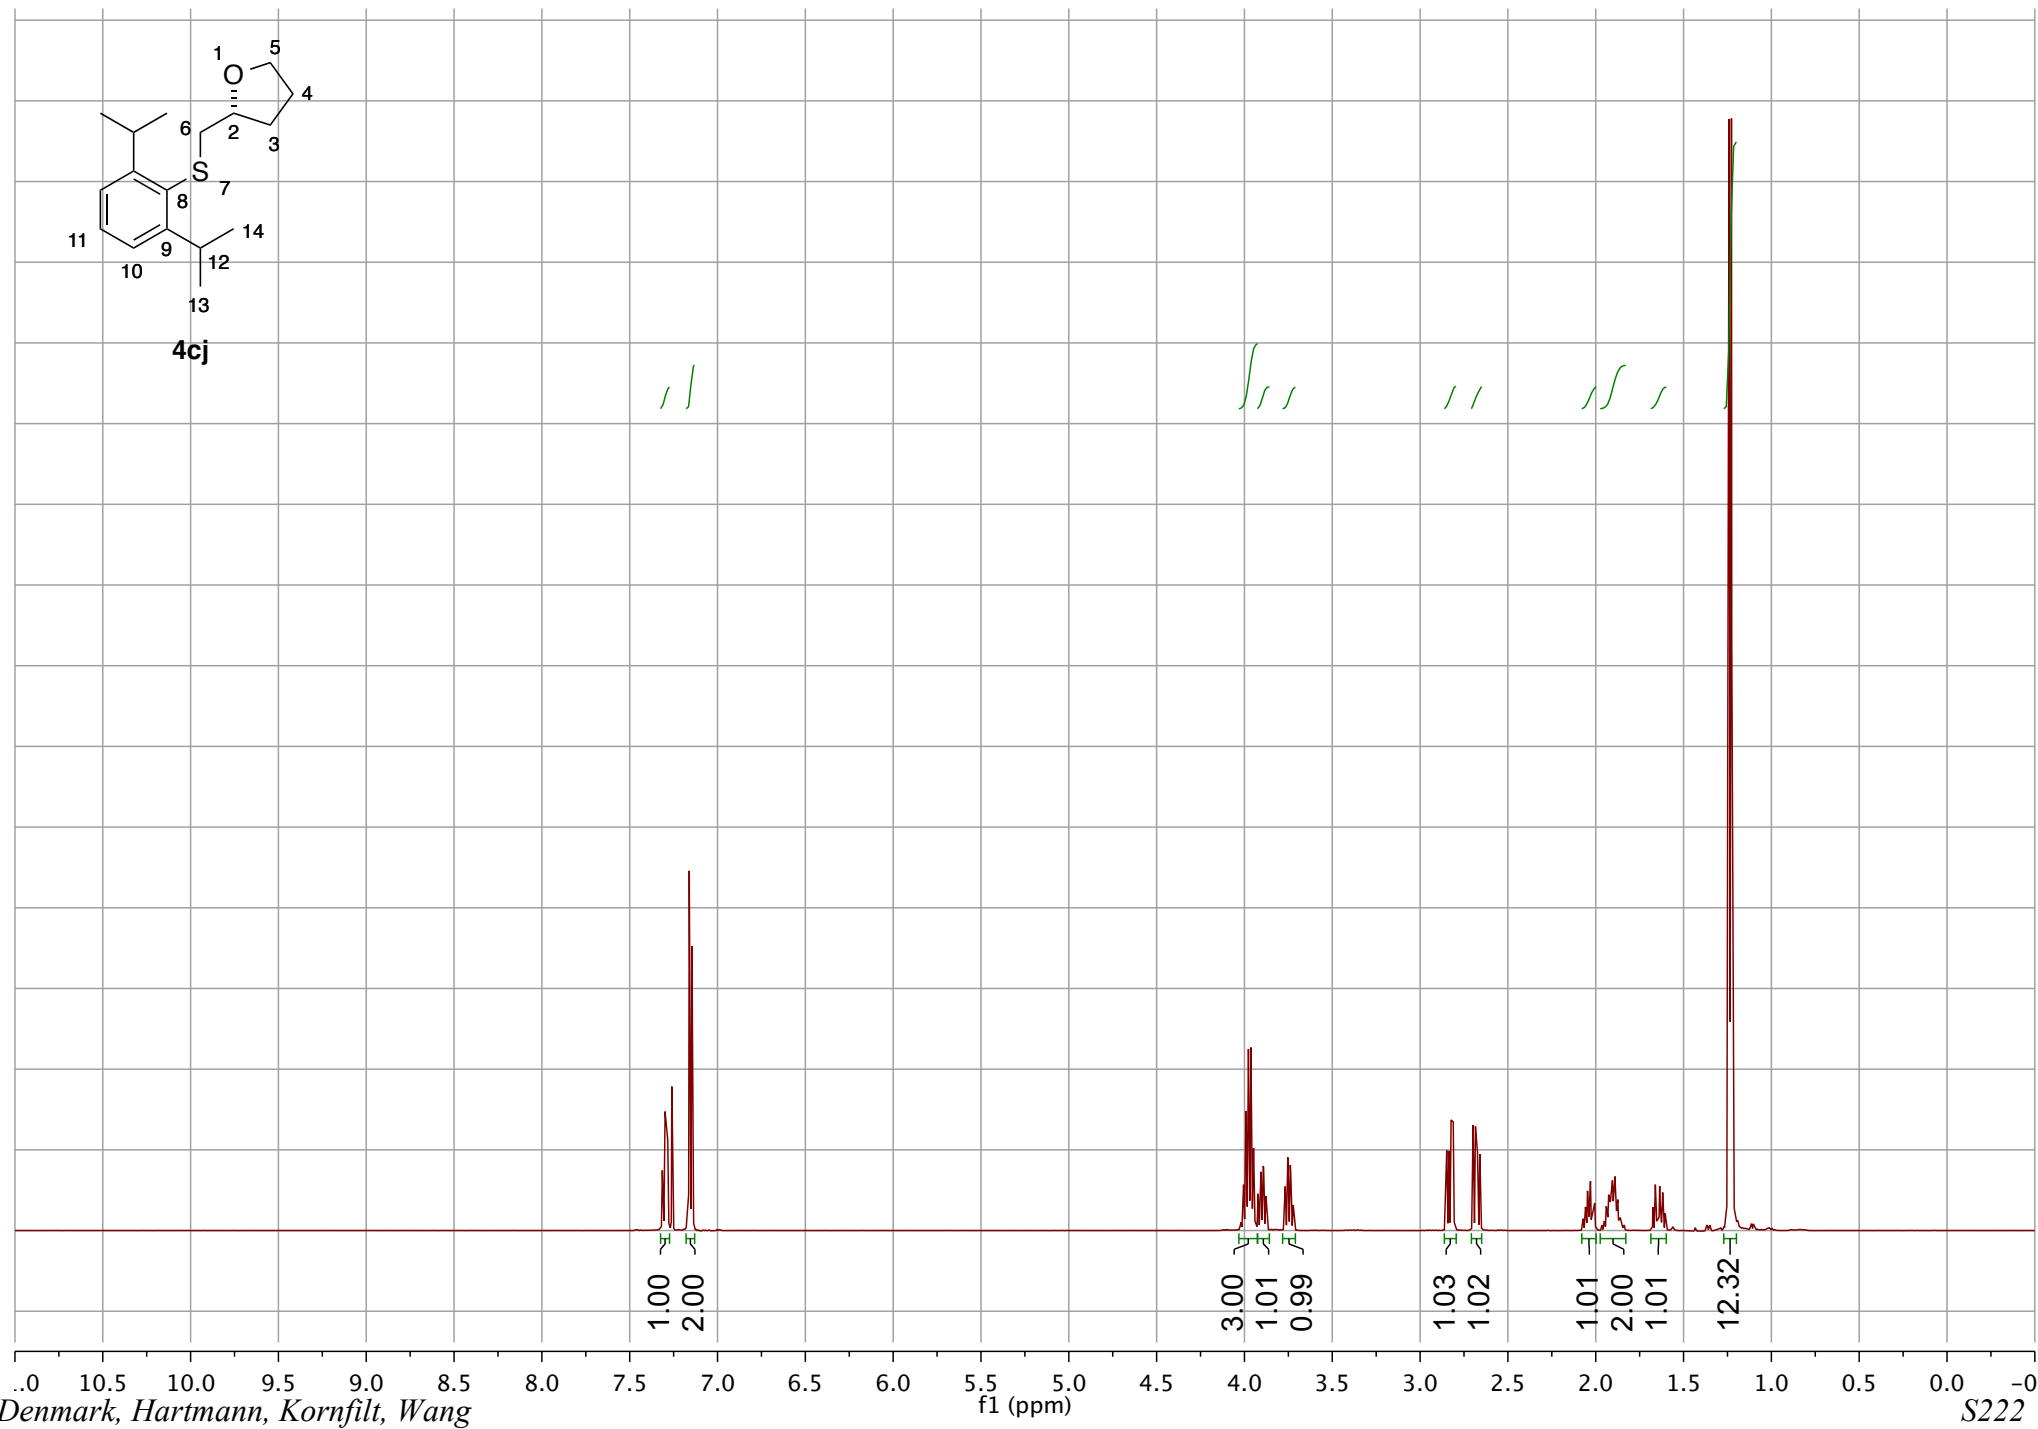

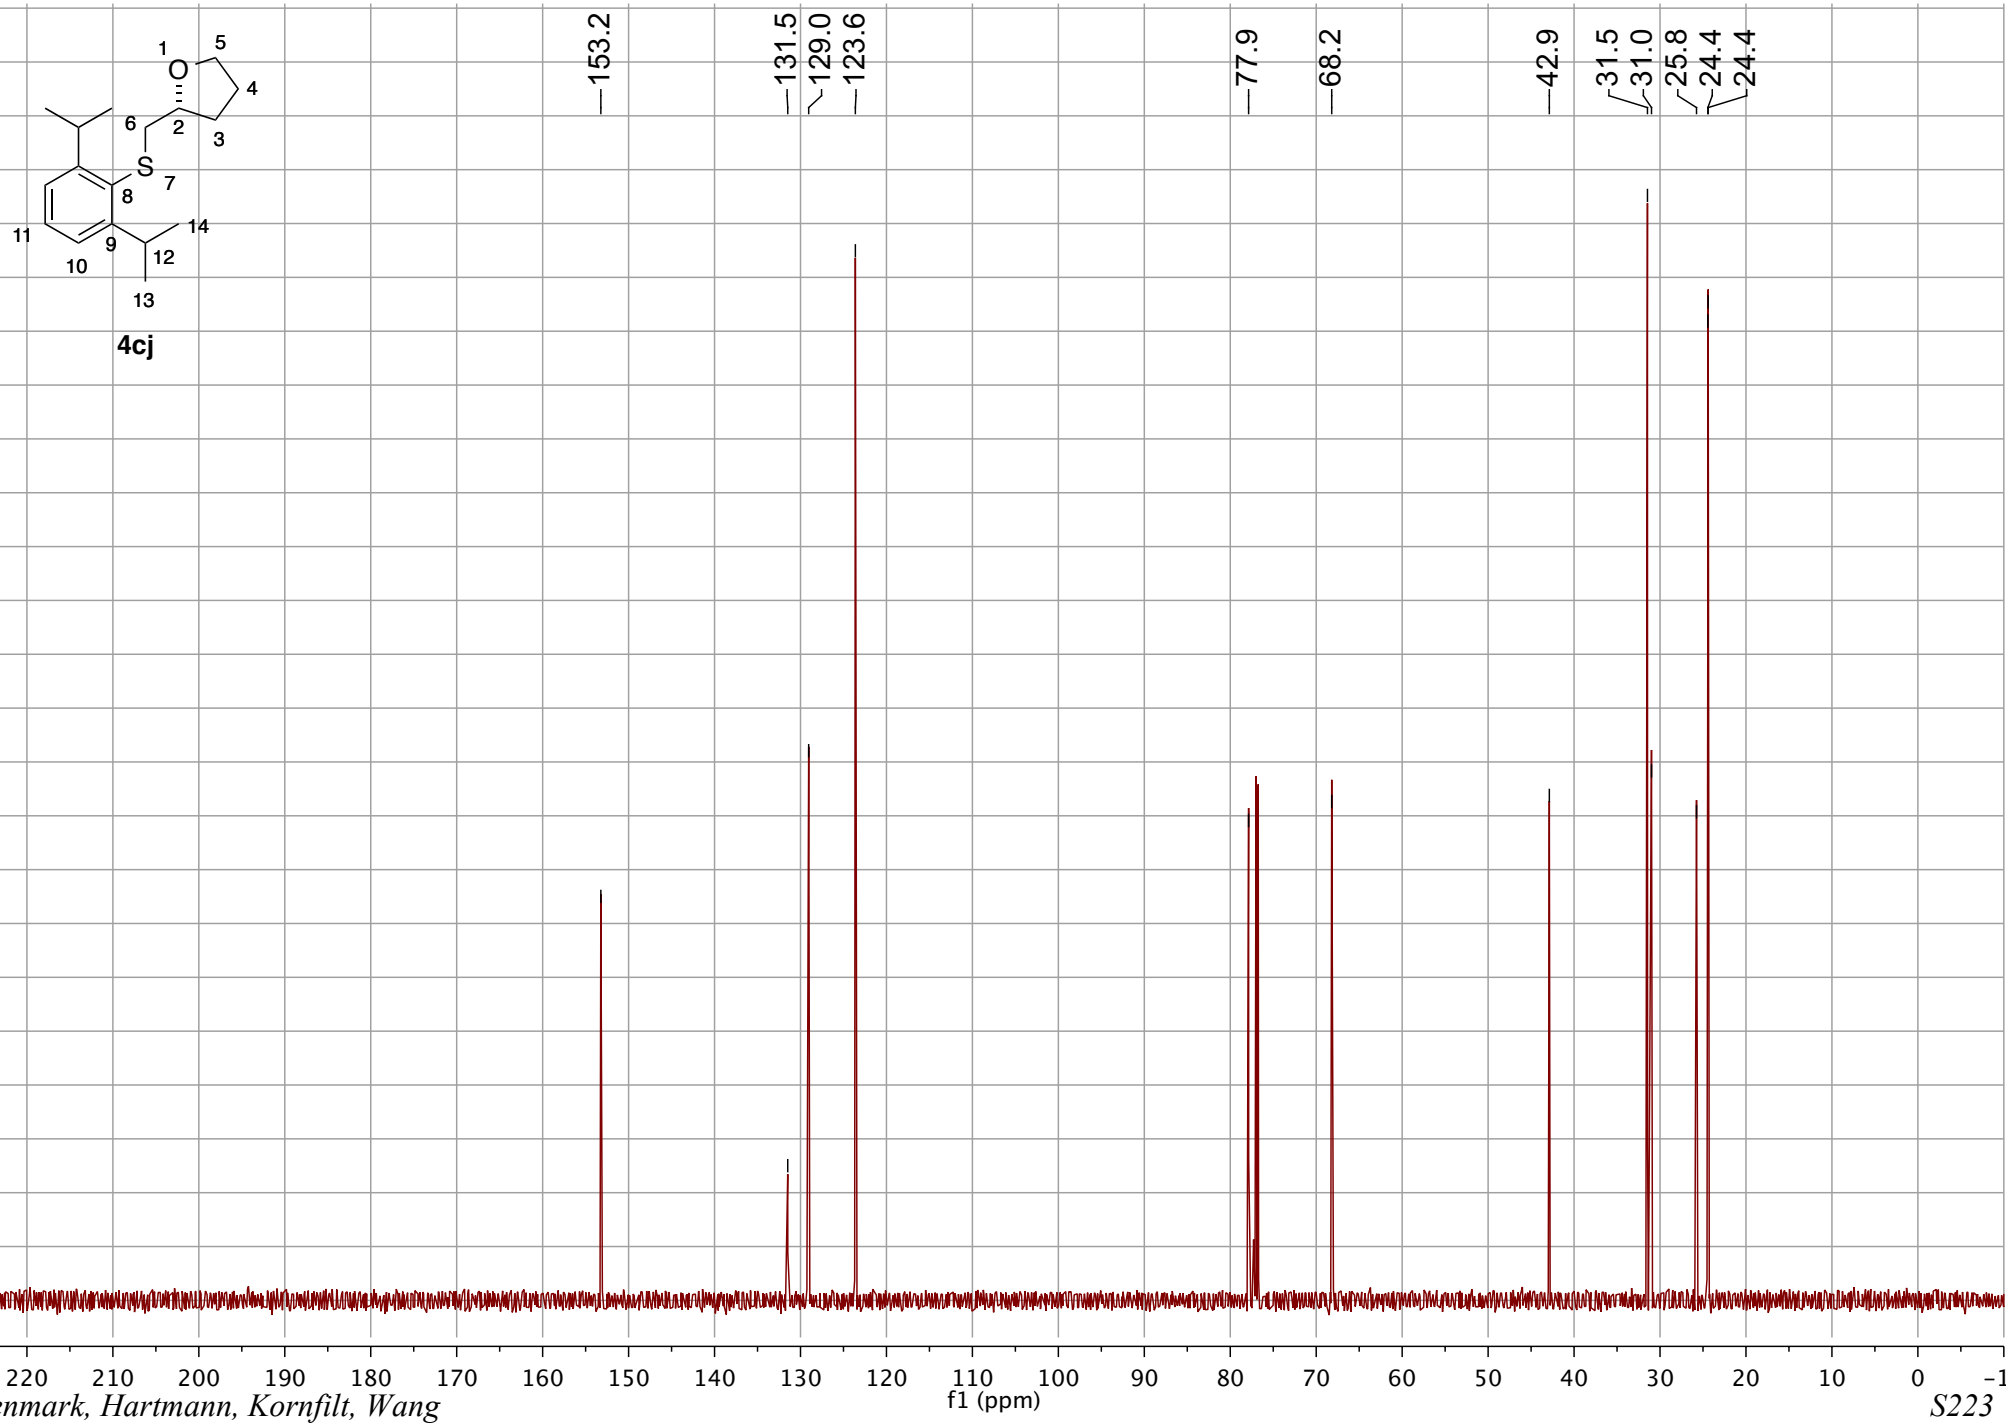

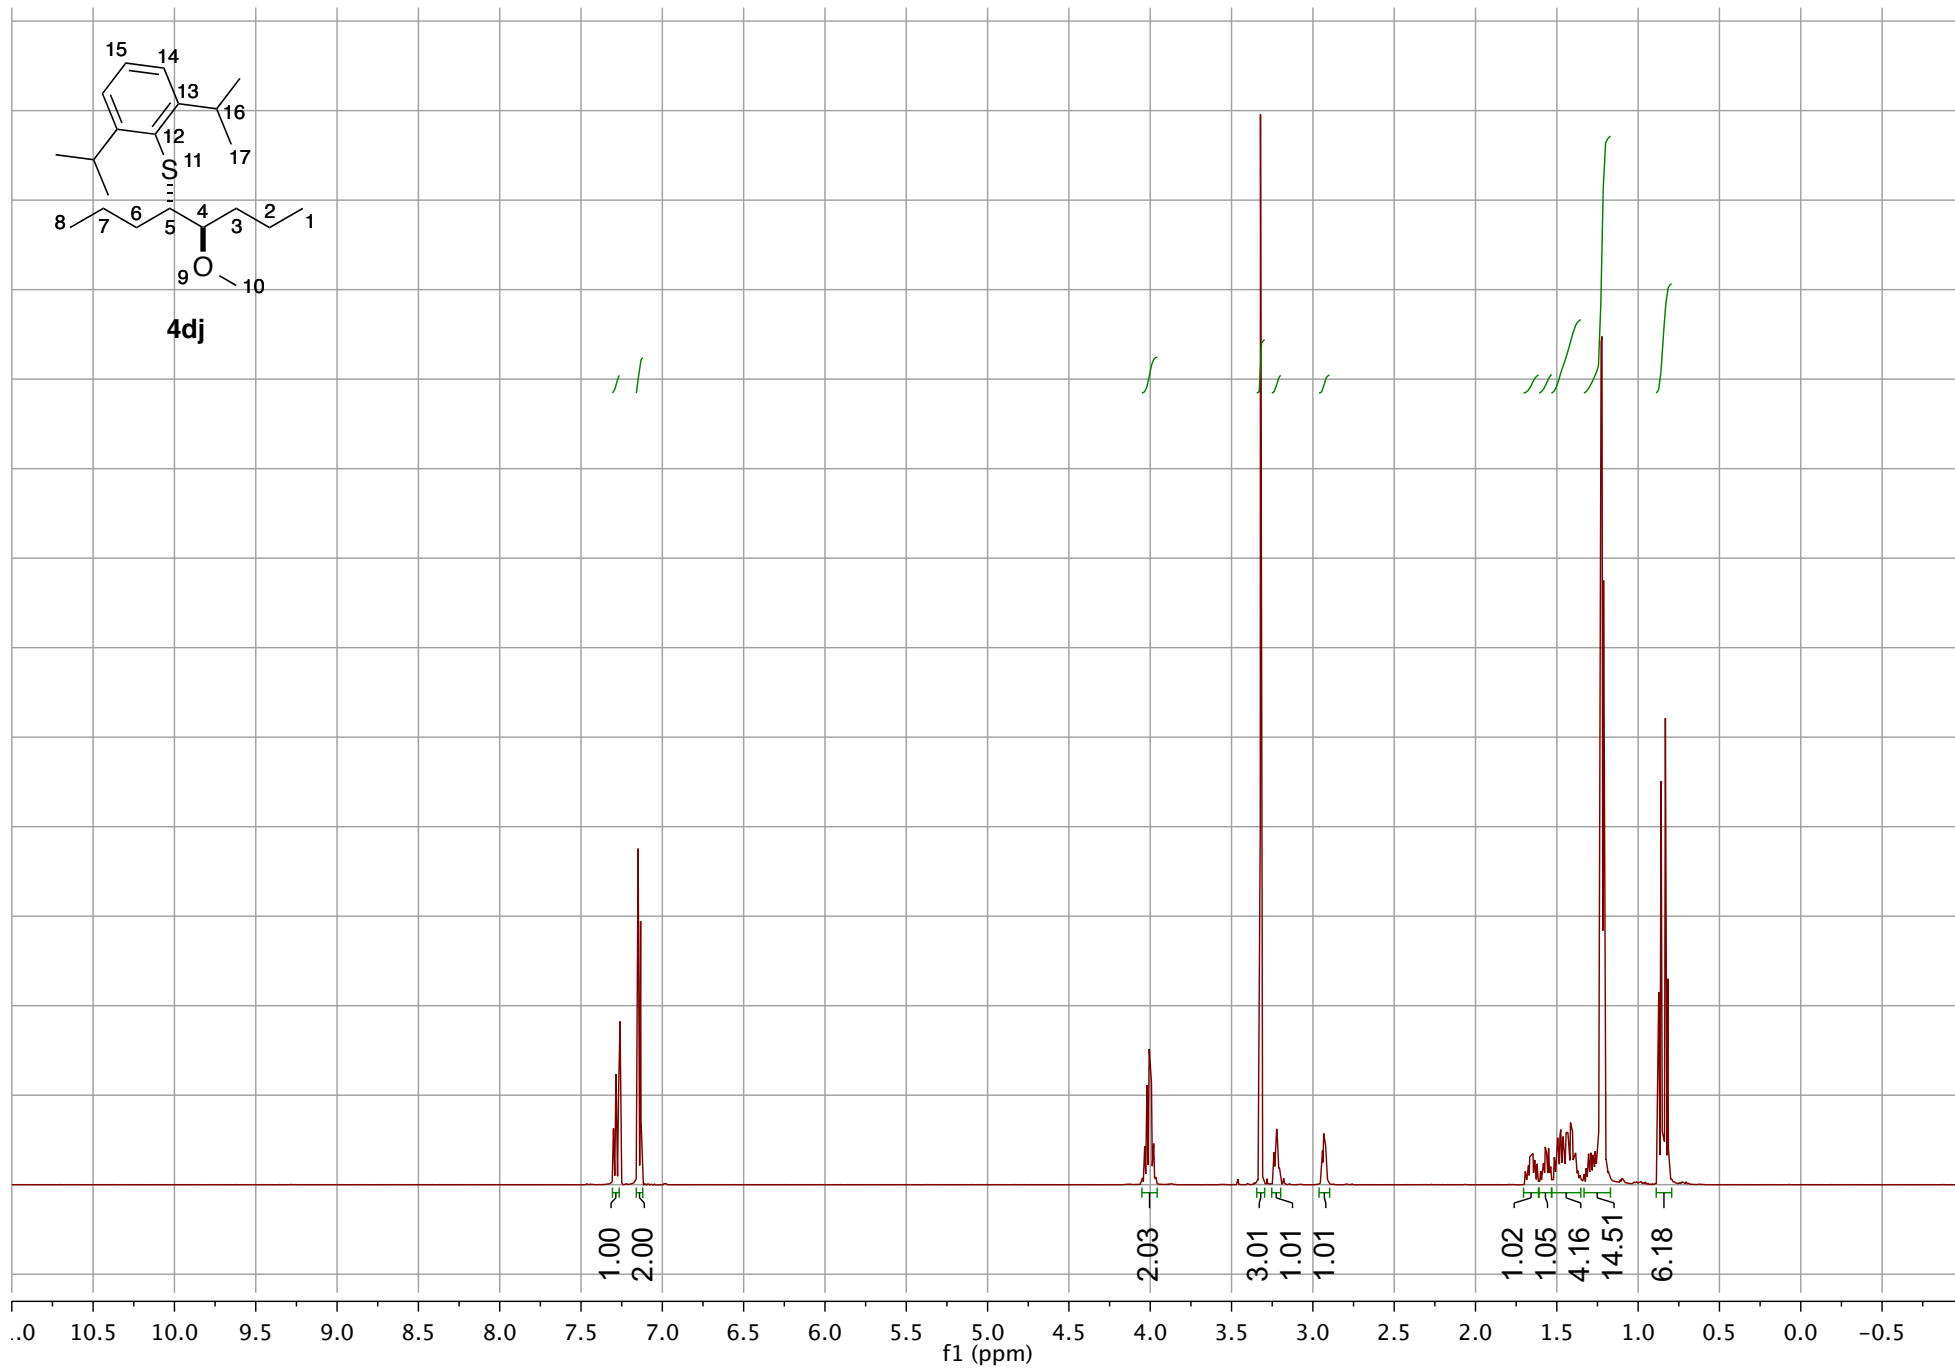



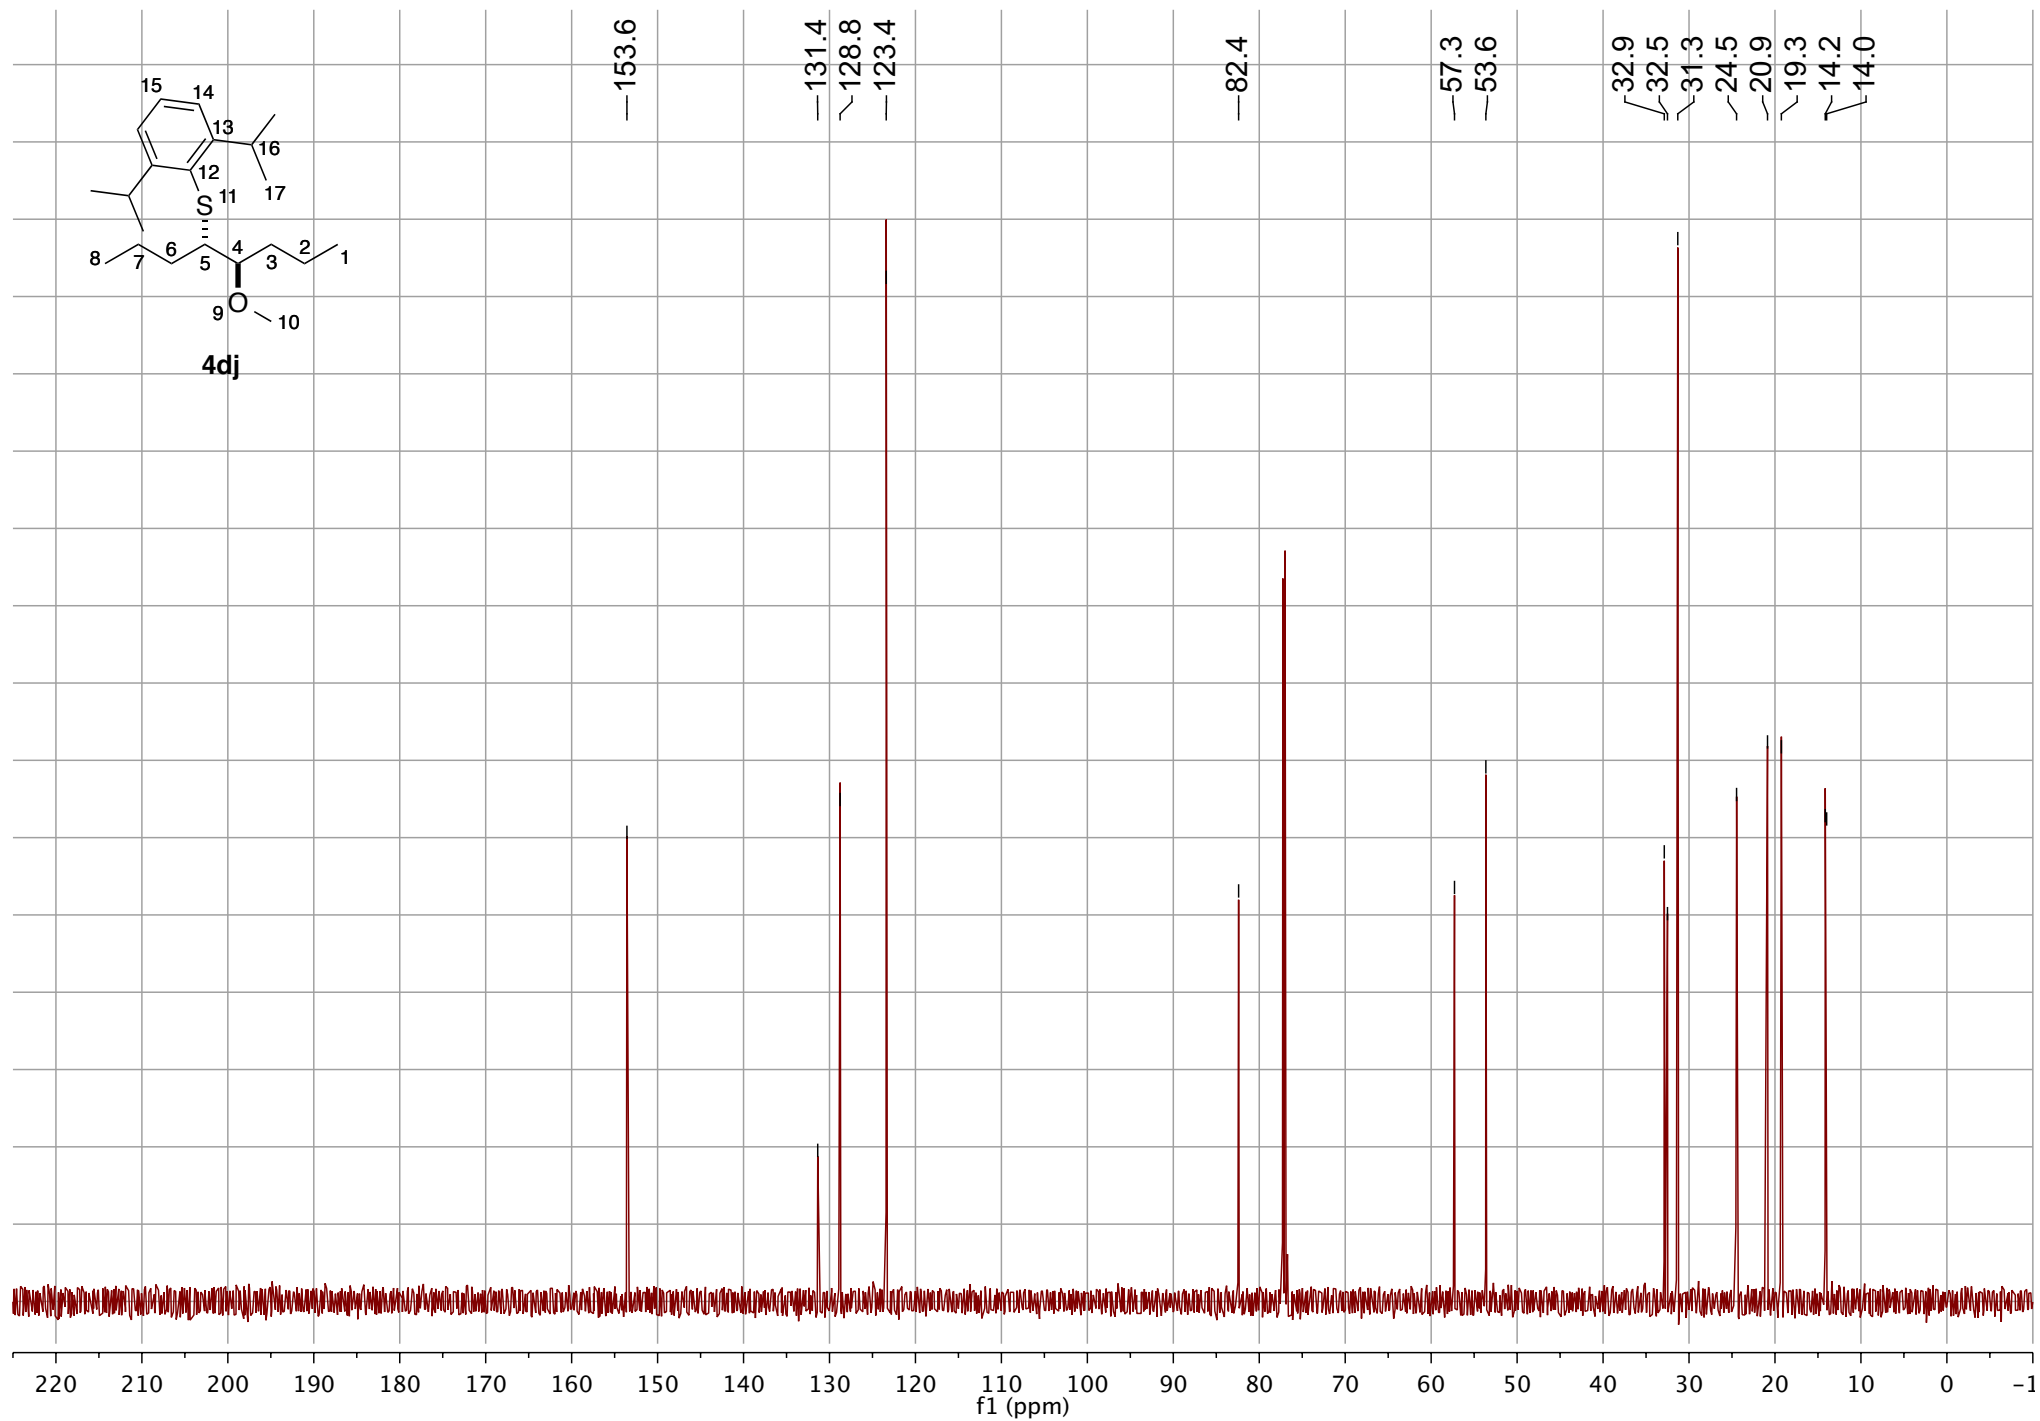

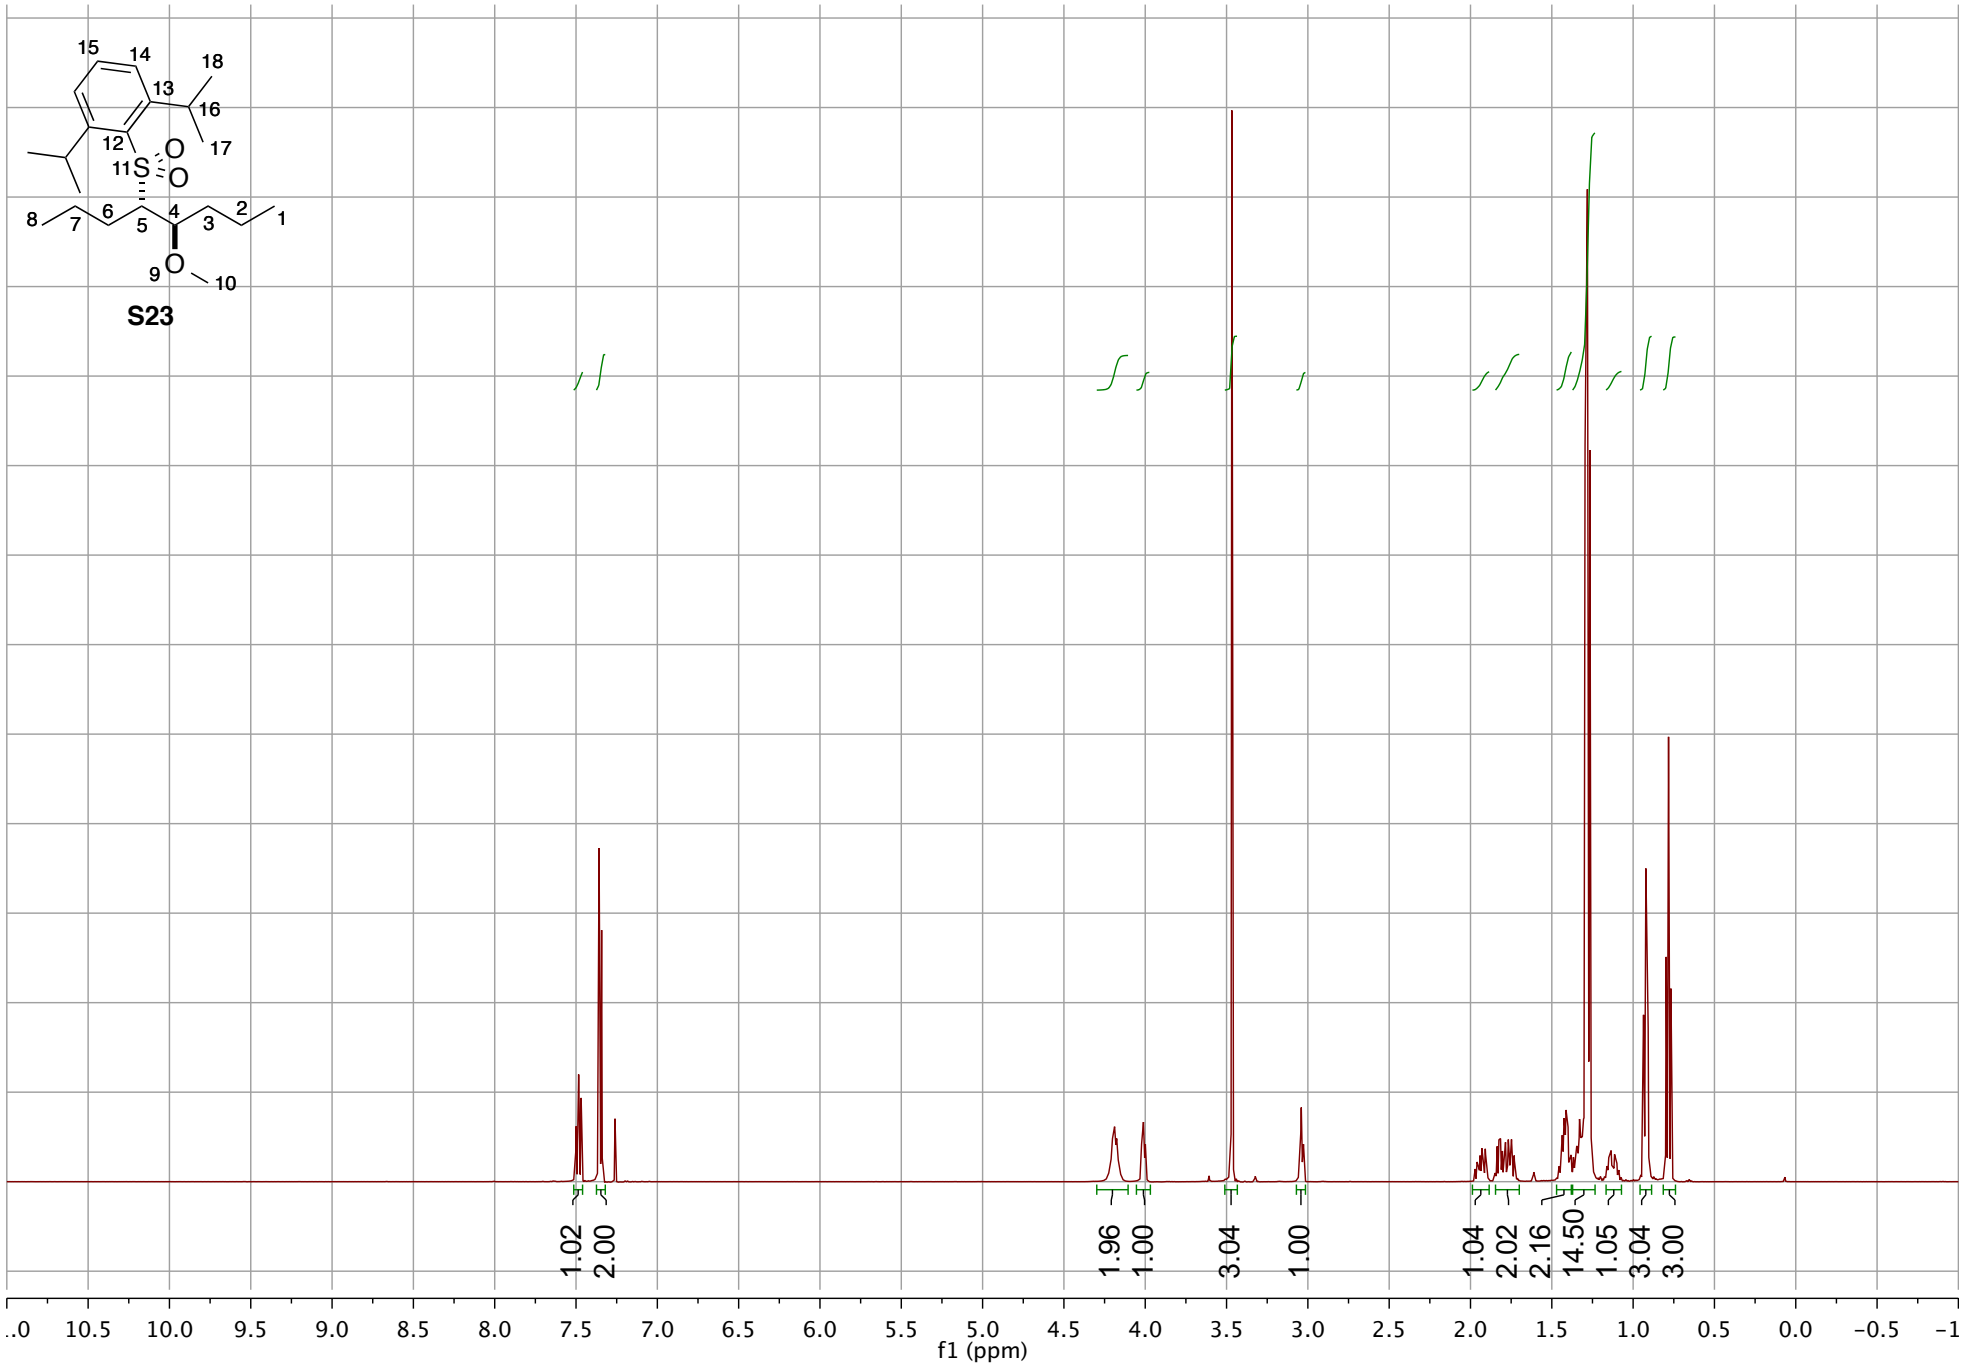

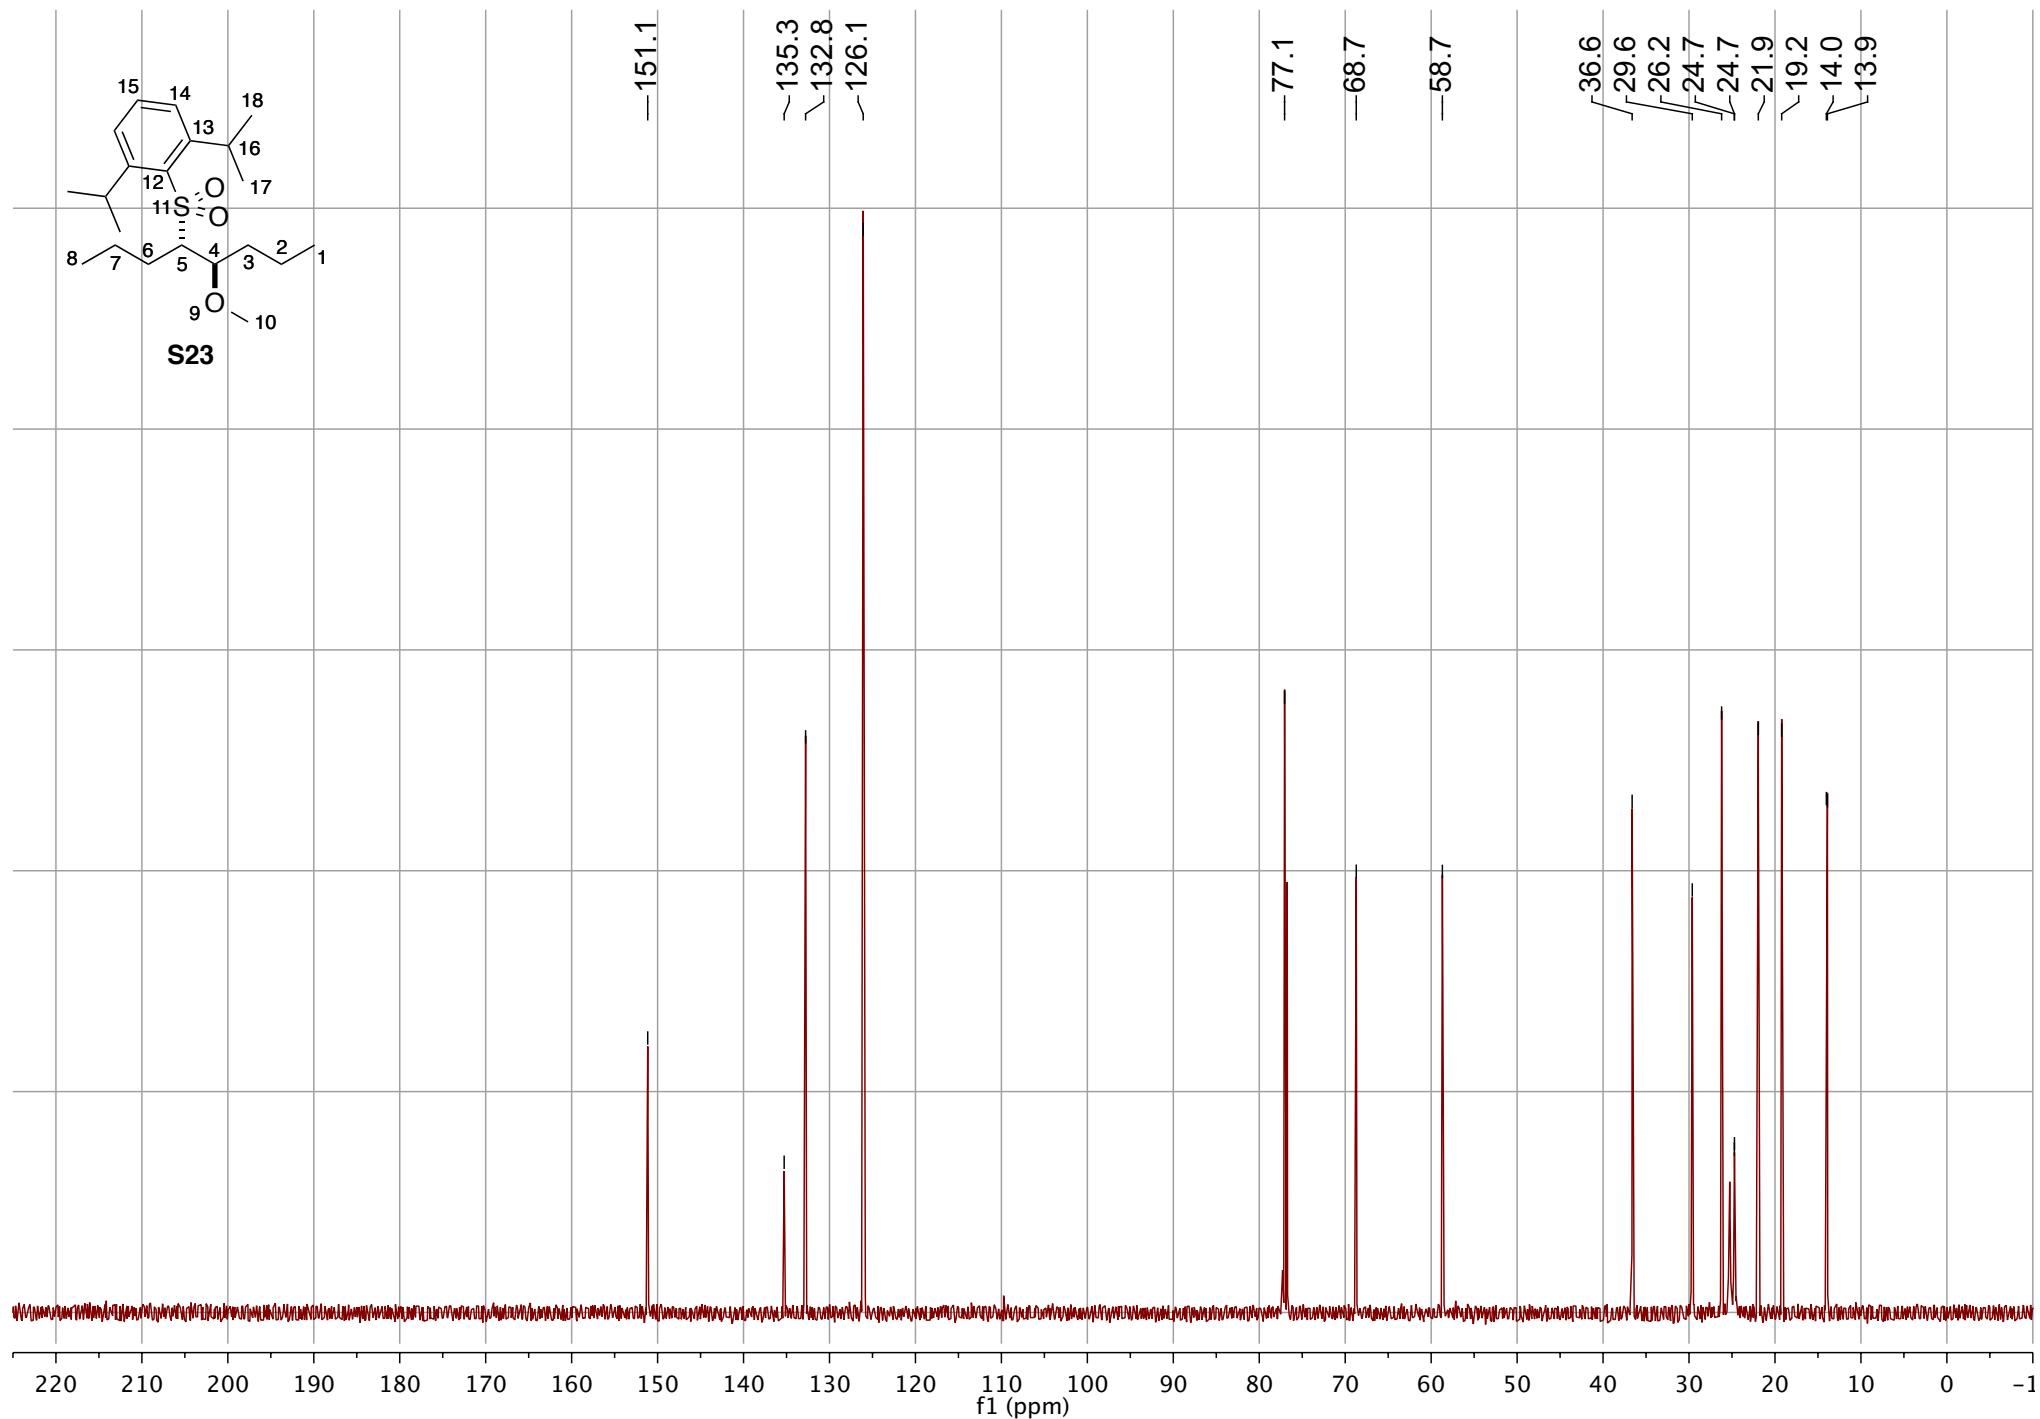

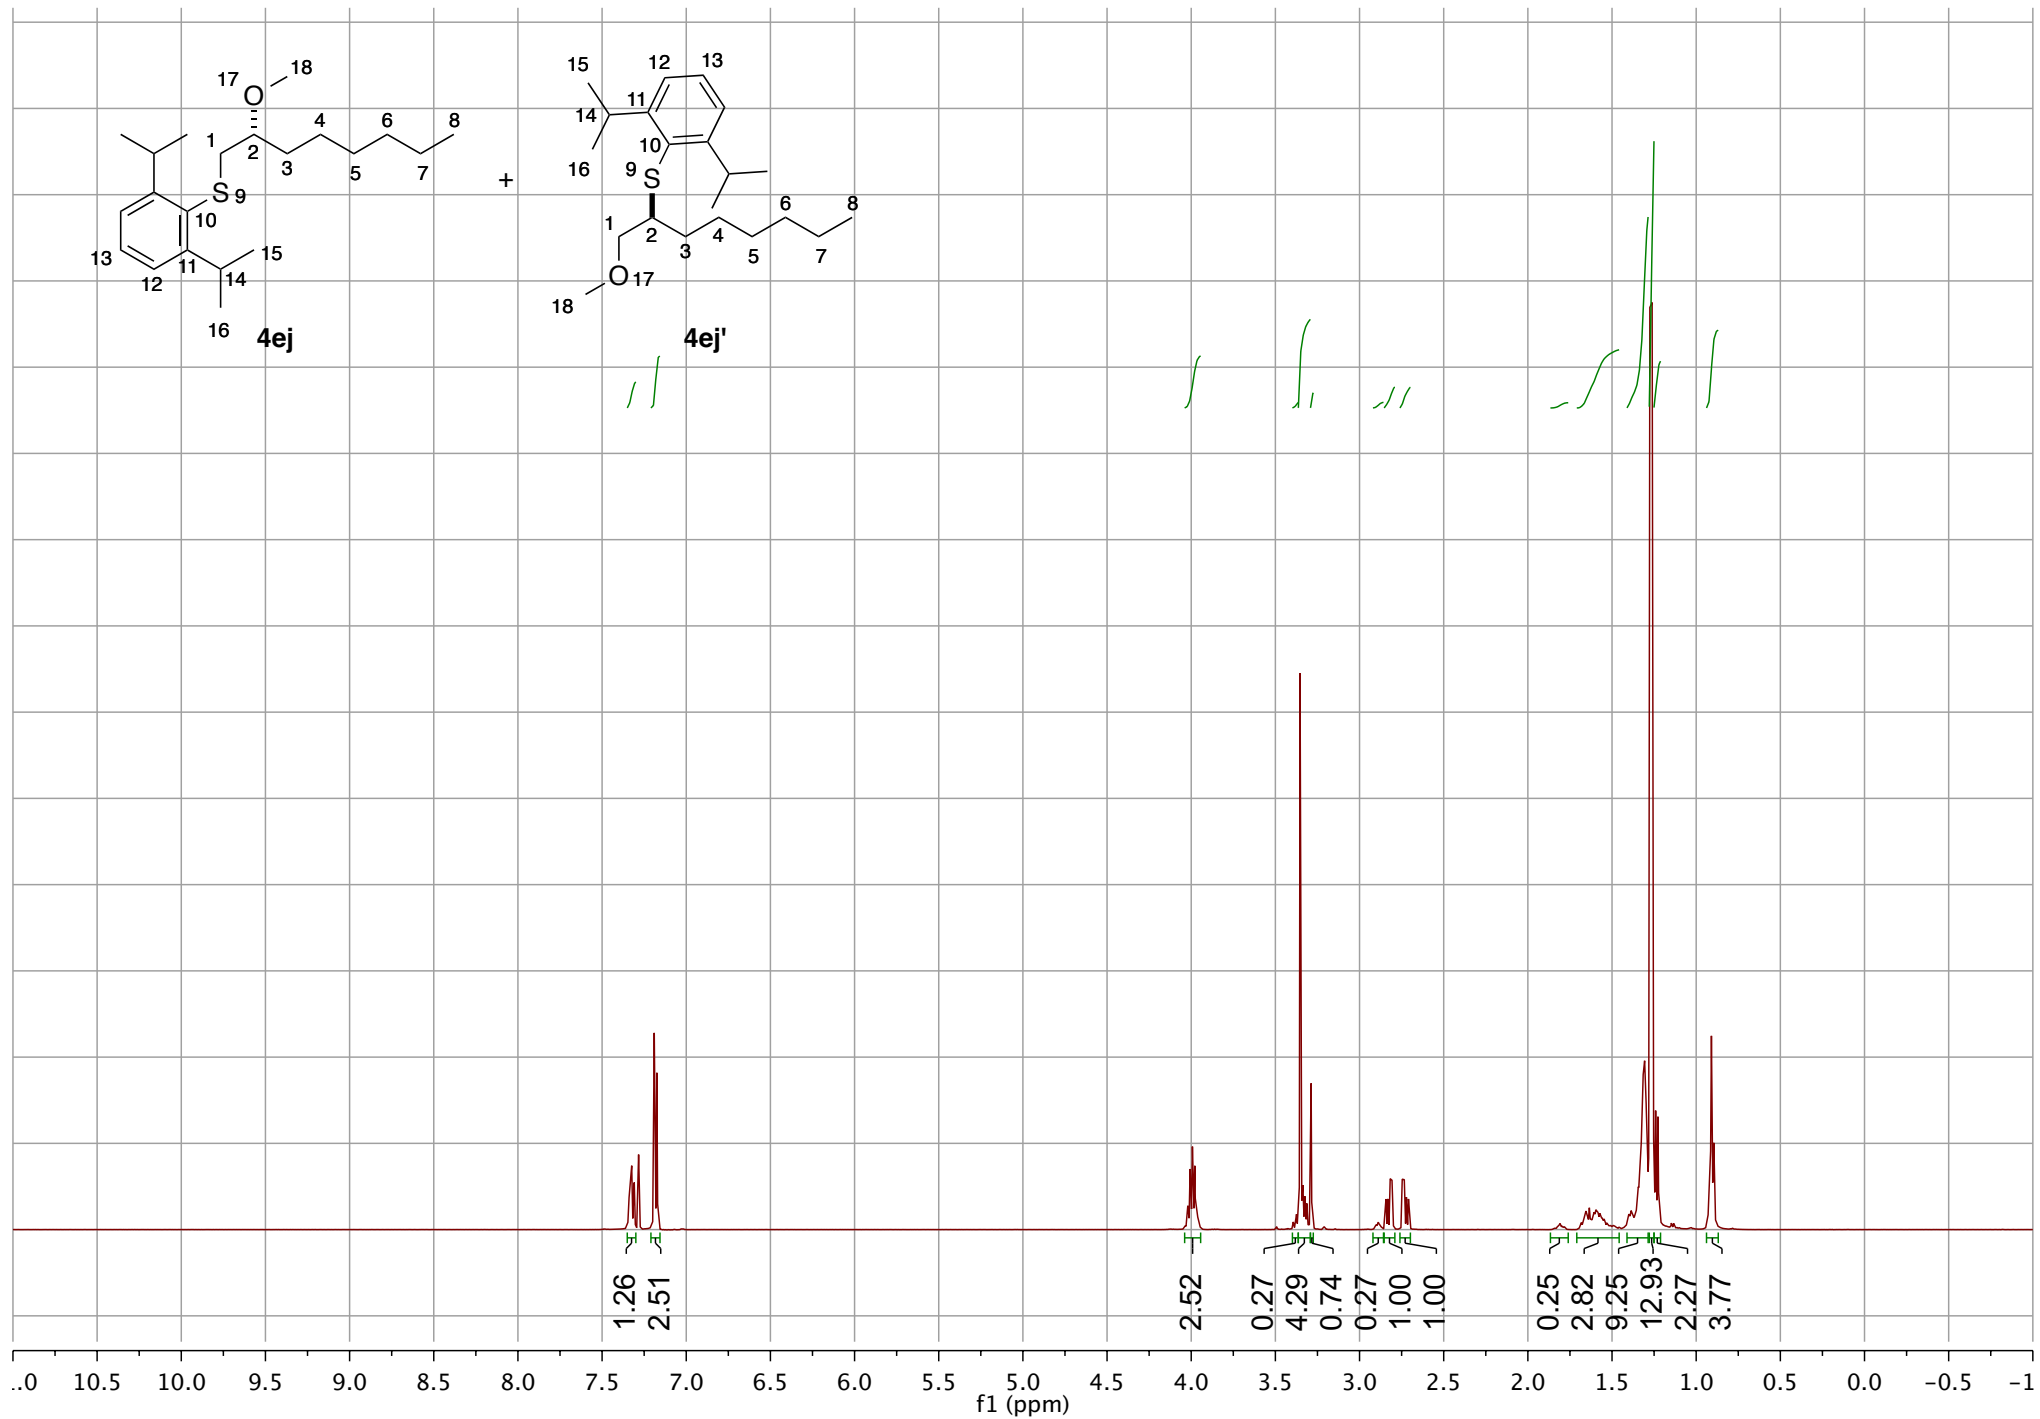

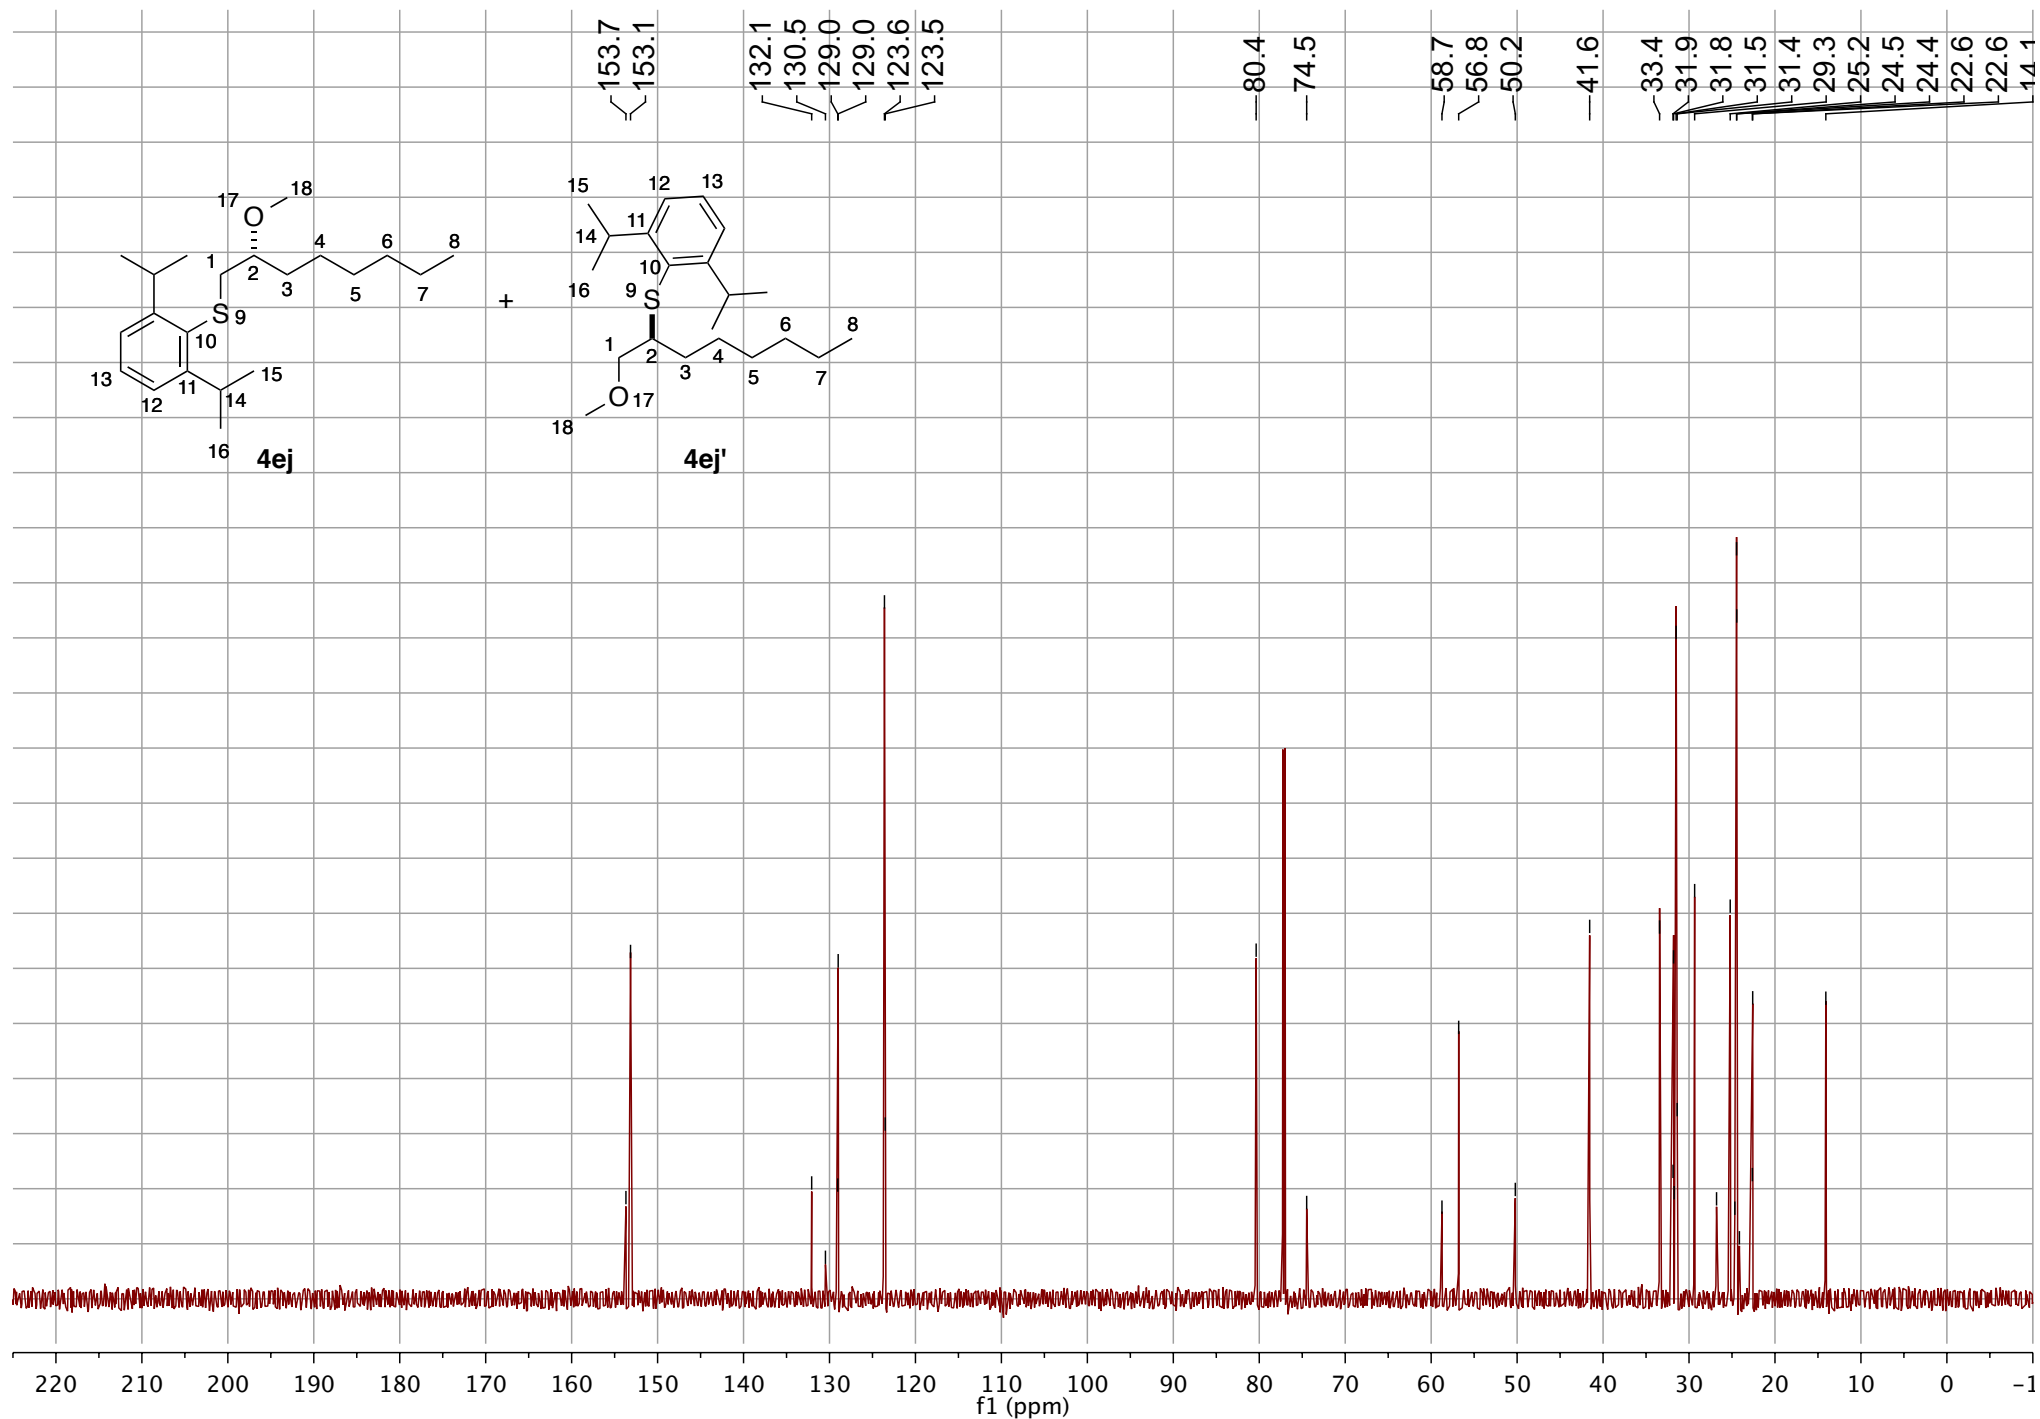

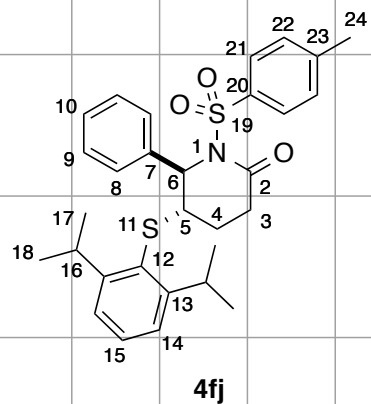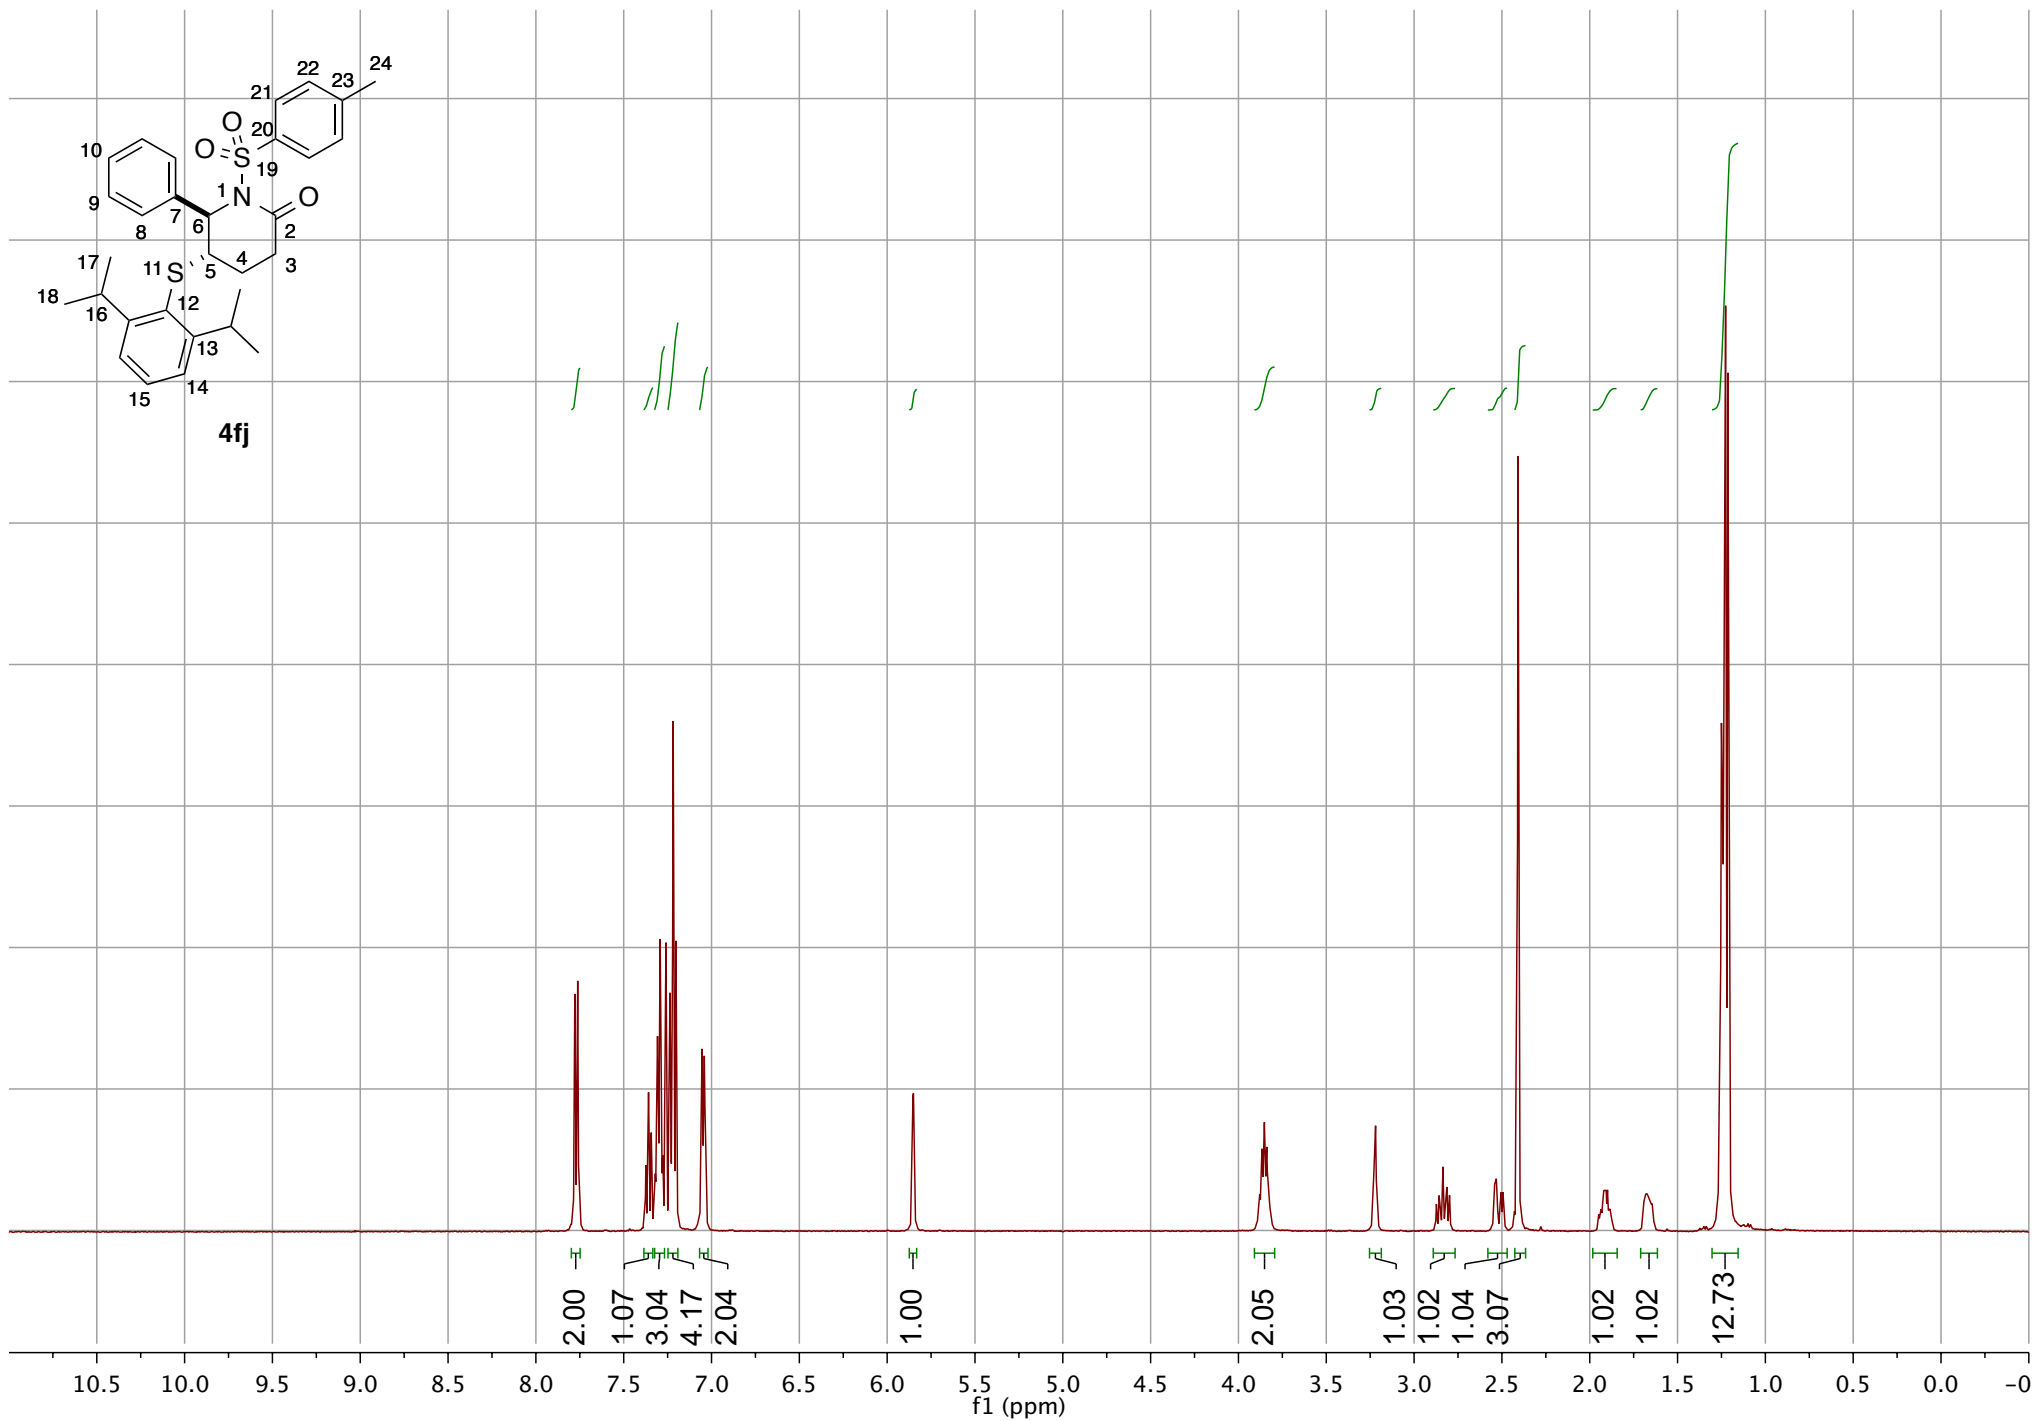

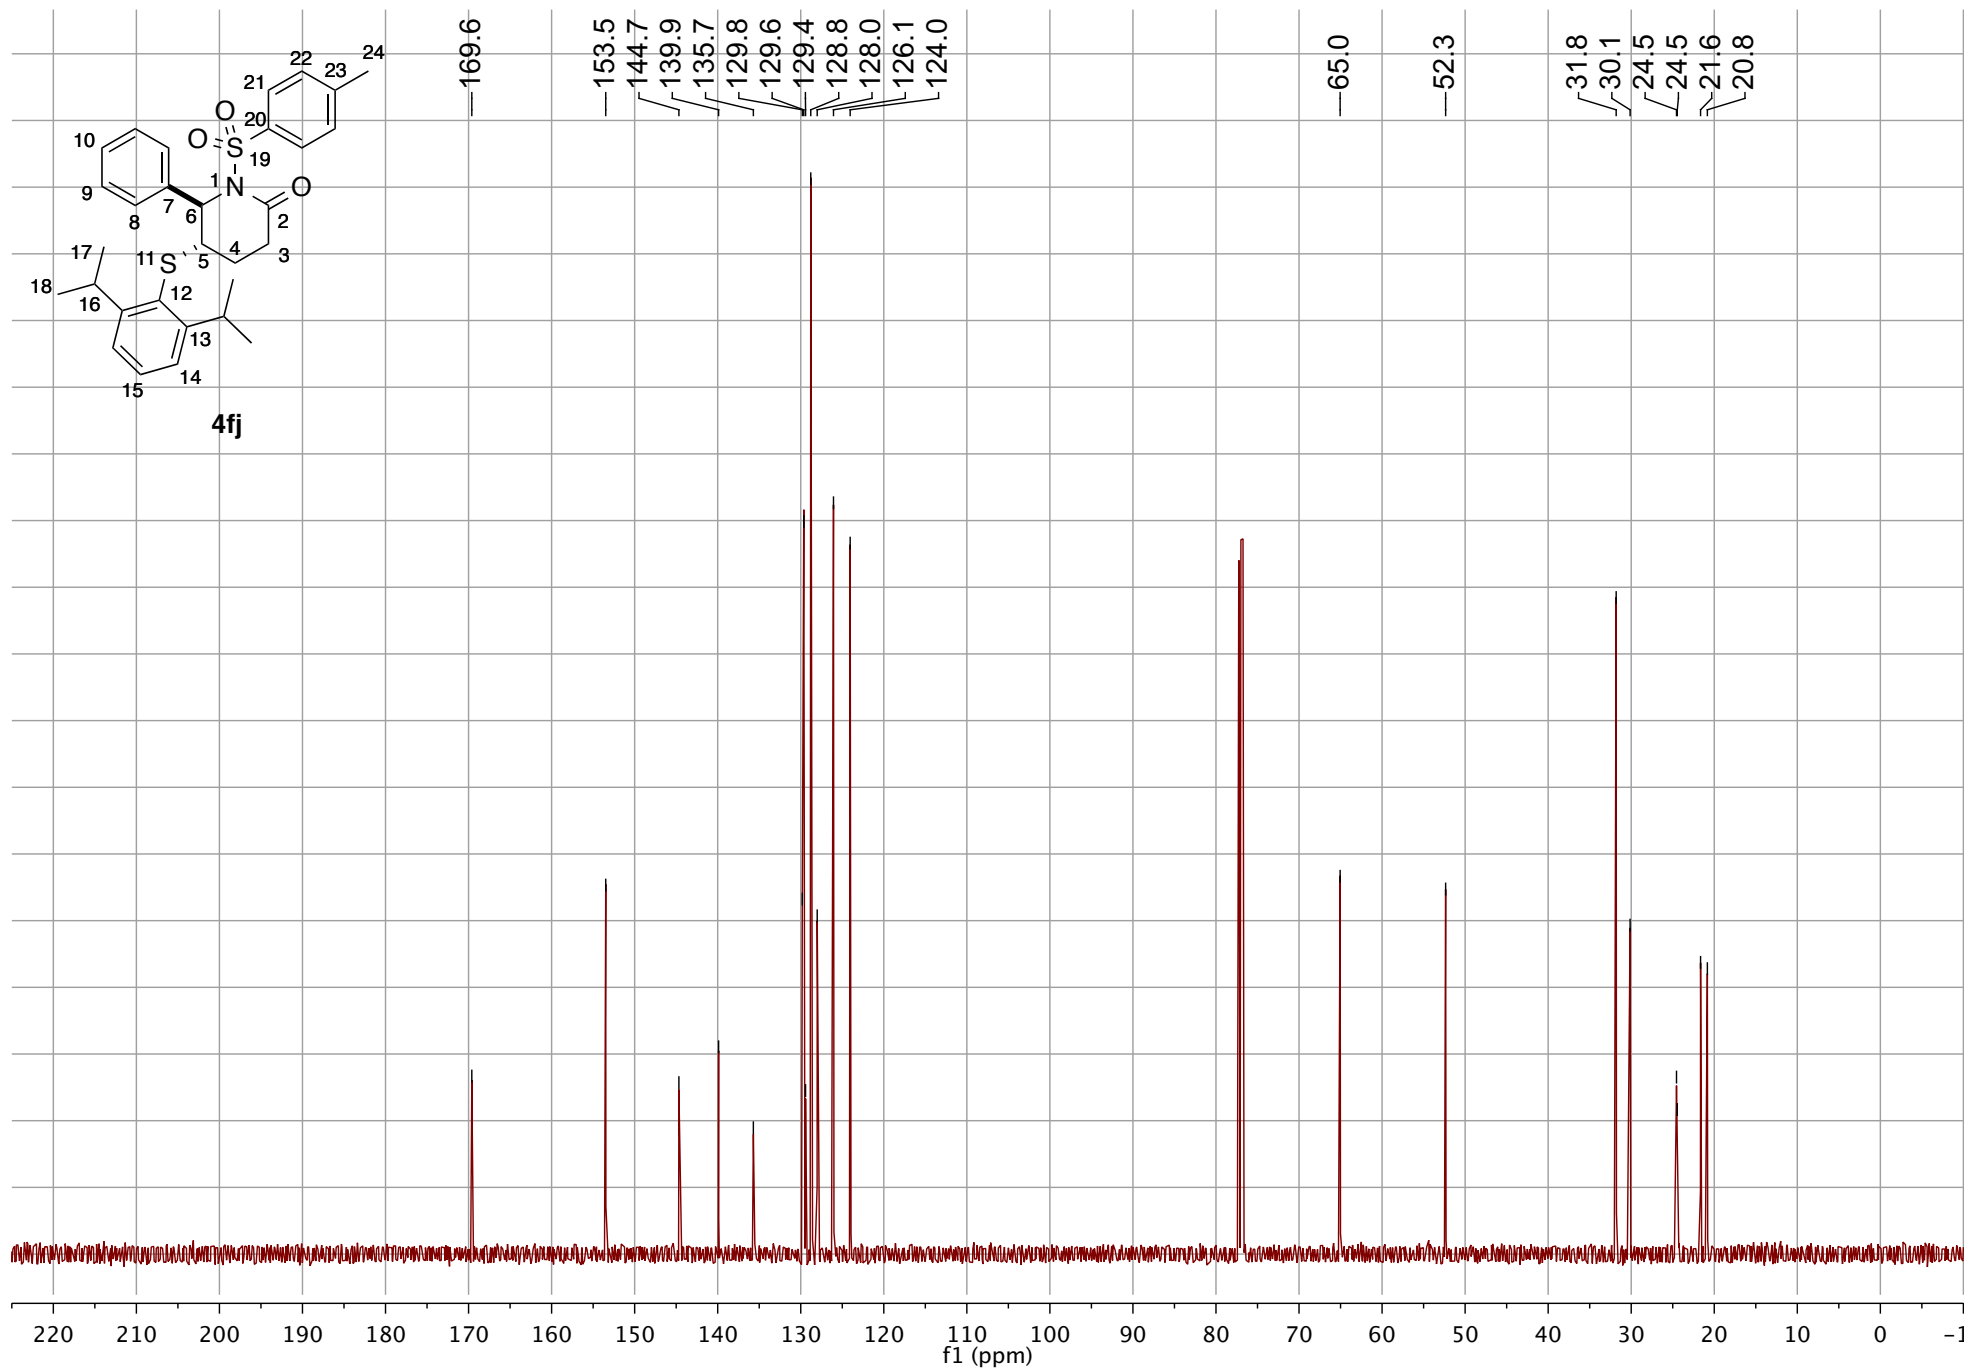

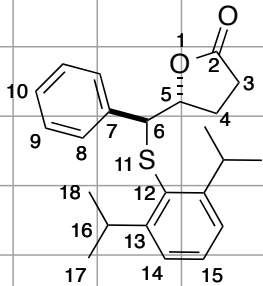

4fj'

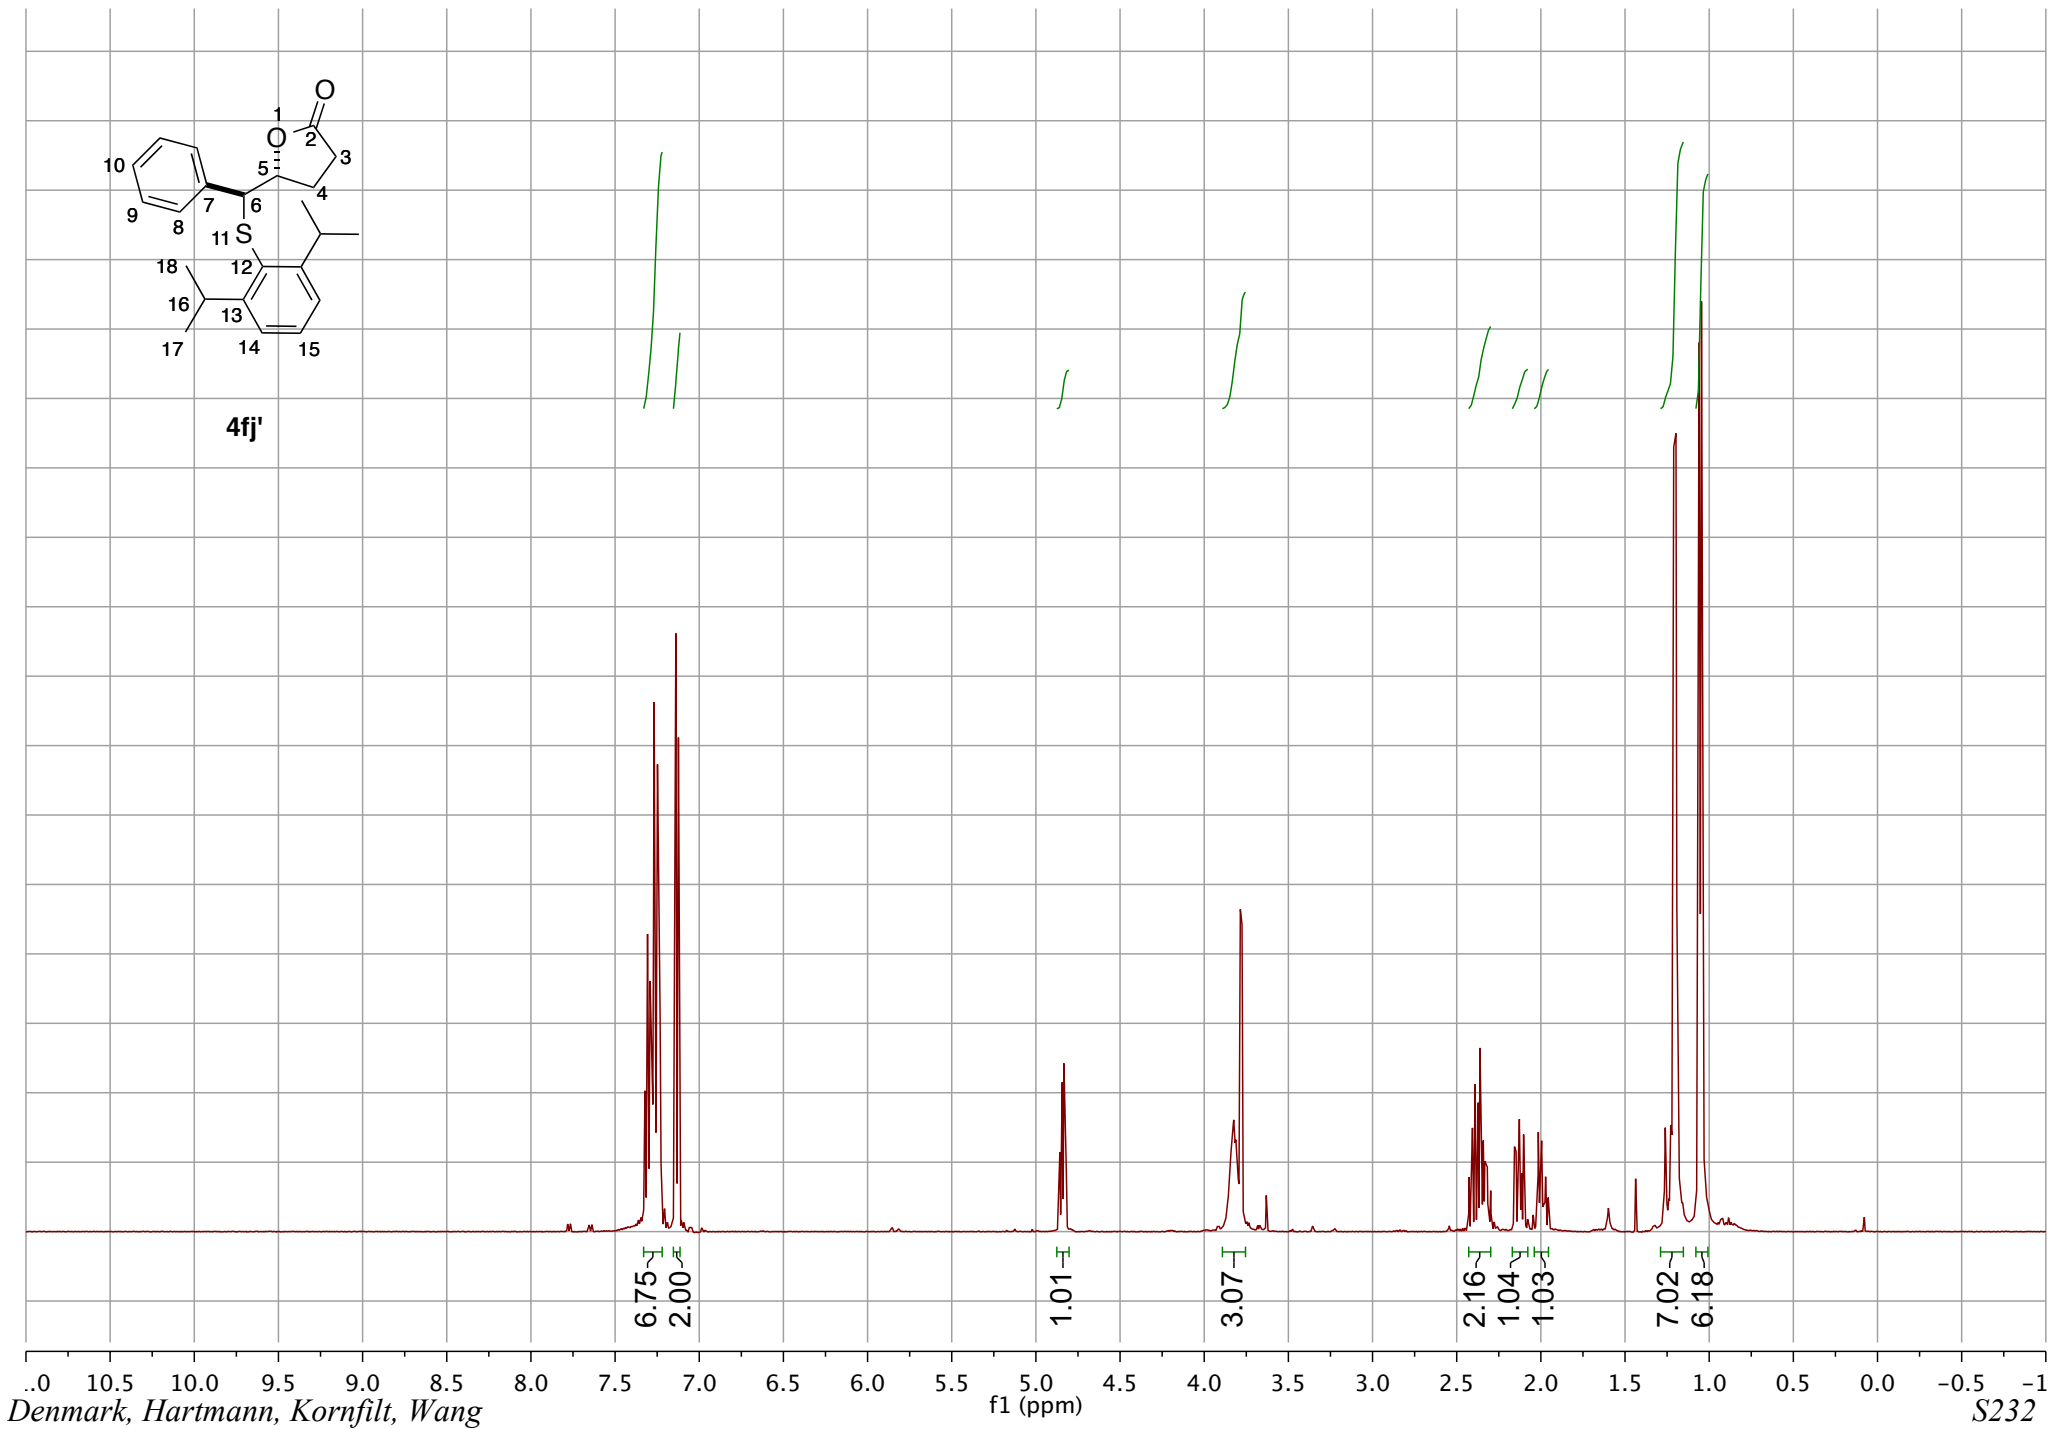



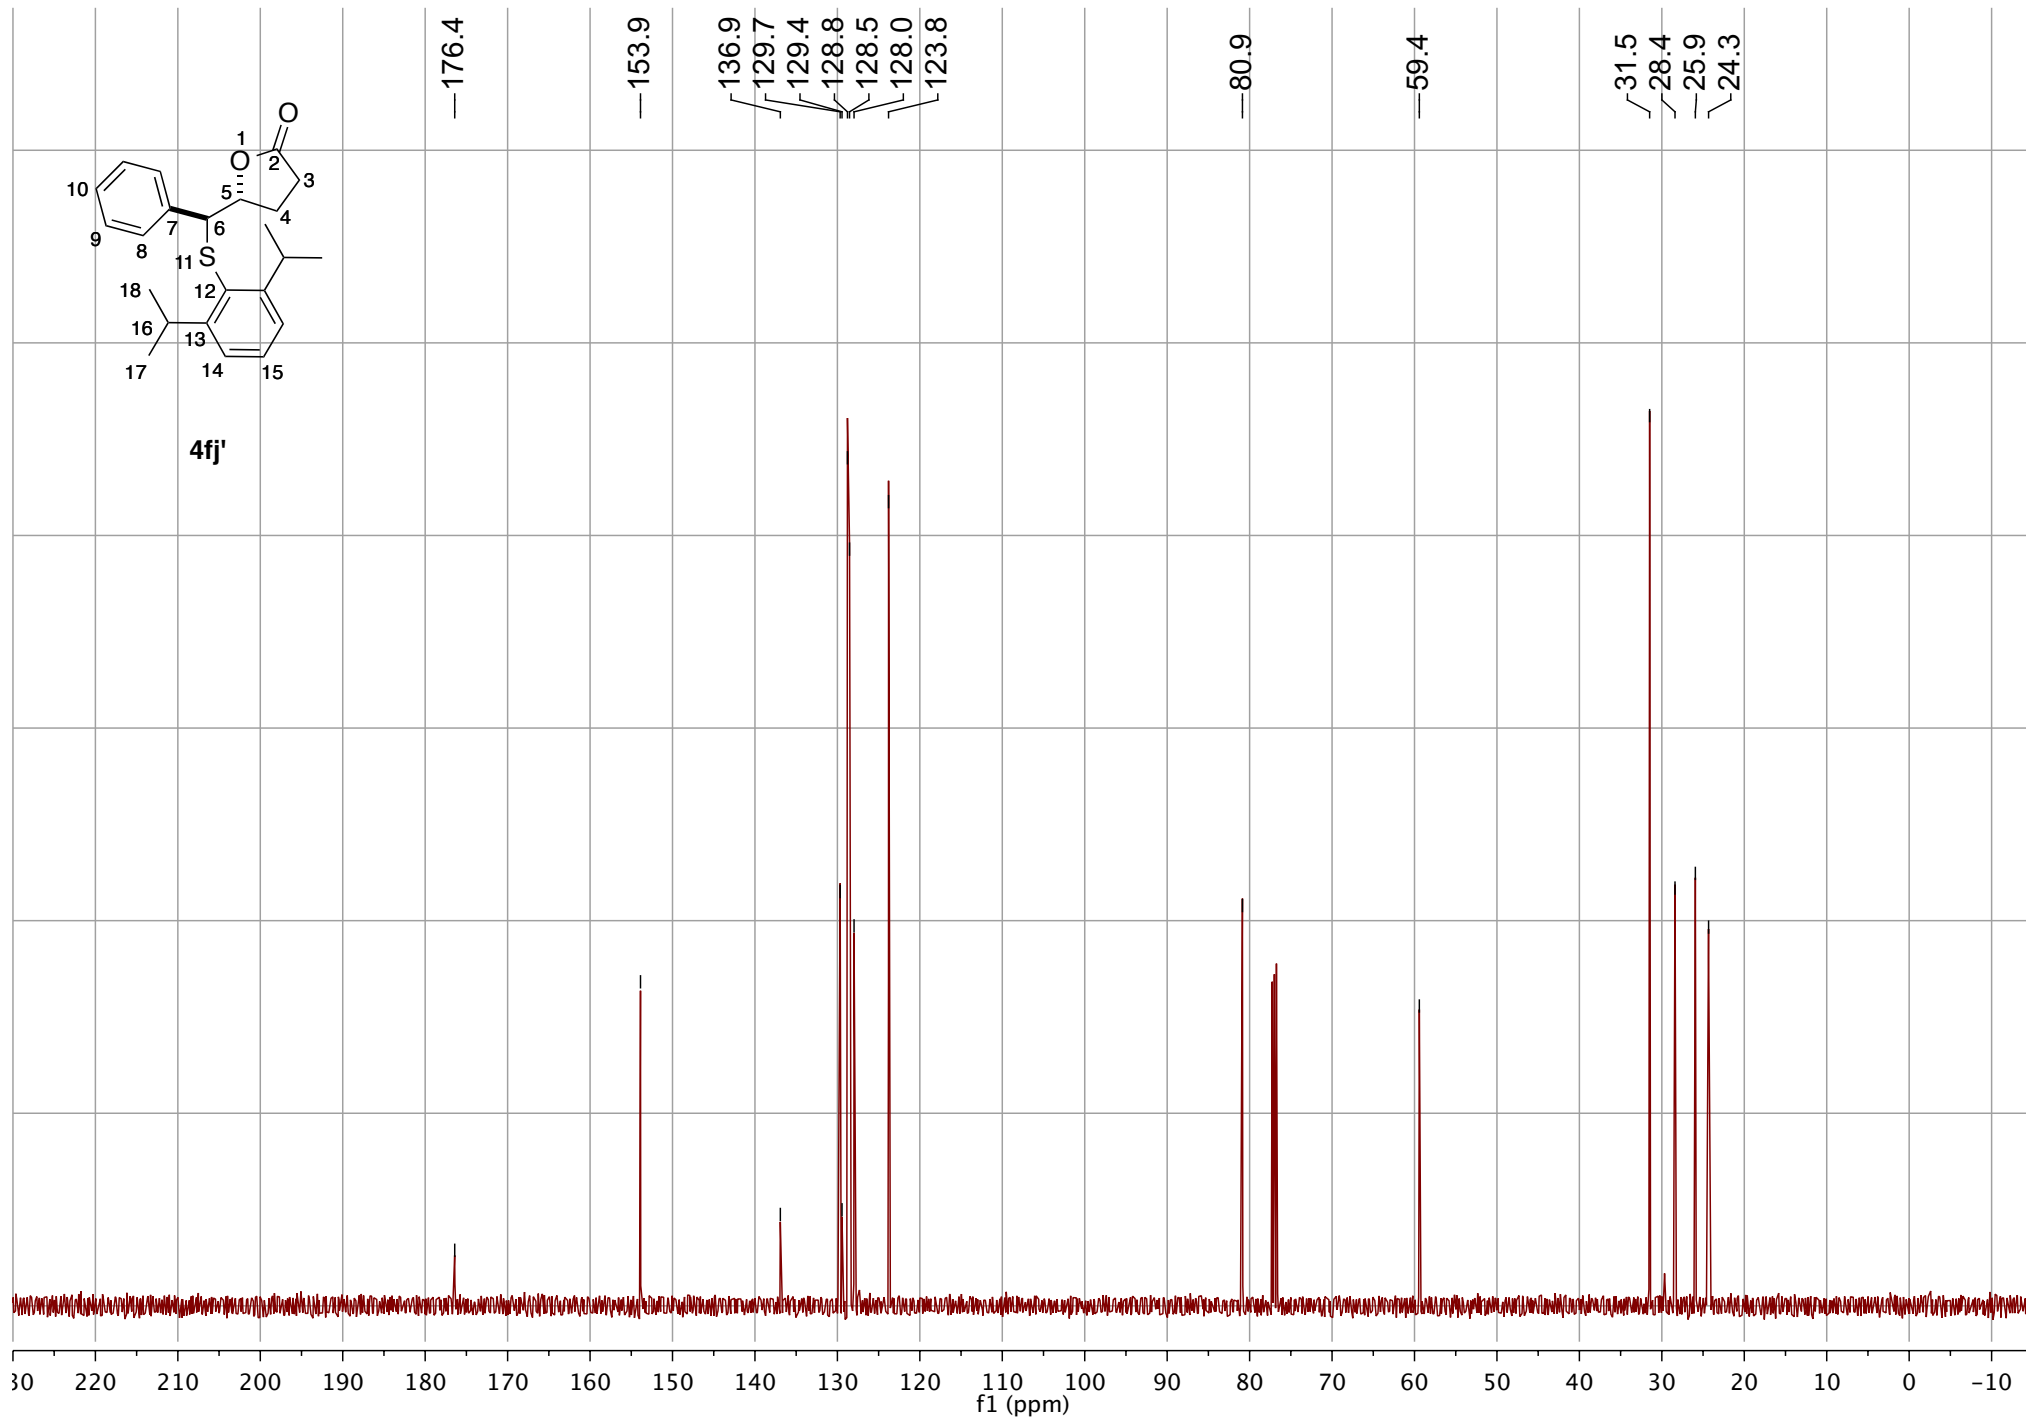

Supplement: NIHMS742352-supplement-SI.pdf [file NIHMS742352-supplement-SI.pdf]
